# Supplementary material for: Transcriptome Analysis Revealed Potential Mechanisms of Resistance to Trichomoniasis gallinae Infection in Pigeon (Columba livia)
Source: Front Vet Sci. 2021 Sep 14;8:672270. doi: 10.3389/fvets.2021.672270 (PMC8477972; doi:10.3389/fvets.2021.672270)
Supplement: Supplementary Table 1 — Genomic locations and types of predicted lncRNA. [file Table_1.XLSX]

## Sheet: Supplementary Table S1
Table S1 Genomic locations and types of predicted lncRNA
LncRNA transcript	Locus	Type
MSTRG.100022.8	NW_004973523.1 : 569849 - 576169	anti-sense_lncRNA
MSTRG.10005.1	NW_004973194.1 : 2571740 - 2583795	anti-sense_lncRNA
MSTRG.10005.2	NW_004973194.1 : 2571952 - 2584222	anti-sense_lncRNA
MSTRG.100201.1	NW_004973526.1 : 236555 - 295123	anti-sense_lncRNA
MSTRG.100201.2	NW_004973526.1 : 277469 - 280139	anti-sense_lncRNA
MSTRG.100292.1	NW_004973526.1 : 854445 - 856683	anti-sense_lncRNA
MSTRG.100321.2	NW_004973526.1 : 1050587 - 1057851	anti-sense_lncRNA
MSTRG.100536.1	NW_004973527.1 : 747864 - 754057	anti-sense_lncRNA
MSTRG.100596.2	NW_004973527.1 : 1188842 - 1204241	anti-sense_lncRNA
MSTRG.100616.1	NW_004973527.1 : 1423669 - 1444800	anti-sense_lncRNA
MSTRG.100678.1	NW_004973529.1 : 181907 - 183846	anti-sense_lncRNA
MSTRG.100680.1	NW_004973529.1 : 184055 - 184593	anti-sense_lncRNA
MSTRG.100737.1	NW_004973529.1 : 407570 - 418062	anti-sense_lncRNA
MSTRG.100737.2	NW_004973529.1 : 407661 - 418062	anti-sense_lncRNA
MSTRG.100737.3	NW_004973529.1 : 407663 - 418048	anti-sense_lncRNA
MSTRG.100737.4	NW_004973529.1 : 408929 - 418062	anti-sense_lncRNA
MSTRG.100753.6	NW_004973529.1 : 567399 - 567881	anti-sense_lncRNA
MSTRG.100761.1	NW_004973529.1 : 647232 - 647871	anti-sense_lncRNA
MSTRG.10077.2	NW_004973194.1 : 2964771 - 2966015	anti-sense_lncRNA
MSTRG.100783.1	NW_004973529.1 : 721732 - 728363	anti-sense_lncRNA
MSTRG.100785.1	NW_004973529.1 : 733671 - 734974	anti-sense_lncRNA
MSTRG.101065.1	NW_004973530.1 : 40081 - 45803	anti-sense_lncRNA
MSTRG.101065.2	NW_004973530.1 : 40170 - 45817	anti-sense_lncRNA
MSTRG.101065.3	NW_004973530.1 : 40170 - 45747	anti-sense_lncRNA
MSTRG.101065.4	NW_004973530.1 : 40170 - 88717	anti-sense_lncRNA
MSTRG.101067.1	NW_004973530.1 : 40527 - 42074	anti-sense_lncRNA
MSTRG.101068.1	NW_004973530.1 : 44359 - 78753	anti-sense_lncRNA
MSTRG.101070.1	NW_004973530.1 : 50902 - 72270	anti-sense_lncRNA
MSTRG.101071.1	NW_004973530.1 : 56471 - 57178	anti-sense_lncRNA
MSTRG.101164.1	NW_004973531.1 : 270119 - 283527	anti-sense_lncRNA
MSTRG.101229.1	NW_004973531.1 : 765286 - 789805	anti-sense_lncRNA
MSTRG.101307.1	NW_004973534.1 : 299282 - 342027	anti-sense_lncRNA
MSTRG.101310.1	NW_004973534.1 : 322908 - 371637	anti-sense_lncRNA
MSTRG.101310.2	NW_004973534.1 : 322908 - 363917	anti-sense_lncRNA
MSTRG.101329.1	NW_004973534.1 : 419237 - 464915	anti-sense_lncRNA
MSTRG.101329.2	NW_004973534.1 : 419239 - 504682	anti-sense_lncRNA
MSTRG.101334.1	NW_004973534.1 : 464419 - 518946	anti-sense_lncRNA
MSTRG.101334.2	NW_004973534.1 : 512595 - 518893	anti-sense_lncRNA
MSTRG.101336.1	NW_004973534.1 : 476501 - 496910	anti-sense_lncRNA
MSTRG.101337.1	NW_004973534.1 : 479213 - 512138	anti-sense_lncRNA
MSTRG.101340.1	NW_004973534.1 : 492841 - 533110	anti-sense_lncRNA
MSTRG.101342.1	NW_004973534.1 : 496939 - 497263	anti-sense_lncRNA
MSTRG.101349.1	NW_004973535.1 : 24268 - 28882	anti-sense_lncRNA
MSTRG.101359.1	NW_004973535.1 : 53421 - 54025	anti-sense_lncRNA
MSTRG.101372.1	NW_004973535.1 : 112574 - 144556	anti-sense_lncRNA
MSTRG.101372.2	NW_004973535.1 : 141458 - 144558	anti-sense_lncRNA
MSTRG.101378.5	NW_004973535.1 : 242709 - 327409	anti-sense_lncRNA
MSTRG.101378.7	NW_004973535.1 : 268487 - 325805	anti-sense_lncRNA
MSTRG.101378.8	NW_004973535.1 : 271810 - 306277	anti-sense_lncRNA
MSTRG.101398.1	NW_004973535.1 : 323610 - 355871	anti-sense_lncRNA
MSTRG.101401.1	NW_004973535.1 : 336346 - 344161	anti-sense_lncRNA
MSTRG.101418.1	NW_004973535.1 : 483687 - 500111	anti-sense_lncRNA
MSTRG.101419.1	NW_004973535.1 : 500261 - 550346	anti-sense_lncRNA
MSTRG.101421.1	NW_004973535.1 : 509497 - 542345	anti-sense_lncRNA
MSTRG.101425.1	NW_004973535.1 : 581400 - 607573	anti-sense_lncRNA
MSTRG.101449.1	NW_004973536.1 : 8871 - 11844	anti-sense_lncRNA
MSTRG.101456.1	NW_004973536.1 : 76012 - 128400	anti-sense_lncRNA
MSTRG.101459.1	NW_004973536.1 : 111835 - 122757	anti-sense_lncRNA
MSTRG.101459.5	NW_004973536.1 : 120512 - 125021	anti-sense_lncRNA
MSTRG.101488.1	NW_004973536.1 : 279966 - 282045	anti-sense_lncRNA
MSTRG.101494.1	NW_004973536.1 : 301804 - 306952	anti-sense_lncRNA
MSTRG.101511.1	NW_004973536.1 : 383720 - 397018	anti-sense_lncRNA
MSTRG.101512.1	NW_004973536.1 : 412864 - 442880	anti-sense_lncRNA
MSTRG.101523.3	NW_004973536.1 : 503632 - 516703	anti-sense_lncRNA
MSTRG.101524.2	NW_004973536.1 : 451851 - 507800	anti-sense_lncRNA
MSTRG.101531.1	NW_004973536.1 : 534681 - 545604	anti-sense_lncRNA
MSTRG.101533.1	NW_004973536.1 : 572088 - 583860	anti-sense_lncRNA
MSTRG.101535.2	NW_004973536.1 : 603217 - 614016	anti-sense_lncRNA
MSTRG.101535.3	NW_004973536.1 : 613645 - 646086	anti-sense_lncRNA
MSTRG.101539.1	NW_004973536.1 : 666078 - 672593	anti-sense_lncRNA
MSTRG.101541.2	NW_004973536.1 : 717412 - 743959	anti-sense_lncRNA
MSTRG.101574.1	NW_004973536.1 : 1088135 - 1088600	anti-sense_lncRNA
MSTRG.101580.1	NW_004973536.1 : 1133429 - 1142988	anti-sense_lncRNA
MSTRG.101580.2	NW_004973536.1 : 1142007 - 1143084	anti-sense_lncRNA
MSTRG.101625.1	NW_004973536.1 : 1298936 - 1307870	anti-sense_lncRNA
MSTRG.101625.2	NW_004973536.1 : 1298936 - 1307870	anti-sense_lncRNA
MSTRG.101625.3	NW_004973536.1 : 1299990 - 1308077	anti-sense_lncRNA
MSTRG.101625.4	NW_004973536.1 : 1301029 - 1307944	anti-sense_lncRNA
MSTRG.101625.6	NW_004973536.1 : 1301030 - 1304686	anti-sense_lncRNA
MSTRG.101625.7	NW_004973536.1 : 1301031 - 1307839	anti-sense_lncRNA
MSTRG.101654.1	NW_004973536.1 : 1441699 - 1464163	anti-sense_lncRNA
MSTRG.101677.1	NW_004973536.1 : 1589578 - 1597272	anti-sense_lncRNA
MSTRG.102015.1	NW_004973537.1 : 1117529 - 1149133	anti-sense_lncRNA
MSTRG.102232.1	NW_004973538.1 : 22226 - 37322	anti-sense_lncRNA
MSTRG.102235.1	NW_004973538.1 : 25352 - 32202	anti-sense_lncRNA
MSTRG.102438.1	NW_004973541.1 : 76525 - 104098	anti-sense_lncRNA
MSTRG.102438.2	NW_004973541.1 : 76525 - 152765	anti-sense_lncRNA
MSTRG.102452.1	NW_004973541.1 : 173684 - 176131	anti-sense_lncRNA
MSTRG.102453.1	NW_004973541.1 : 177158 - 179036	anti-sense_lncRNA
MSTRG.102482.1	NW_004973541.1 : 334631 - 422144	anti-sense_lncRNA
MSTRG.10249.1	NW_004973196.1 : 1676087 - 1687553	anti-sense_lncRNA
MSTRG.102497.1	NW_004973541.1 : 416270 - 435109	anti-sense_lncRNA
MSTRG.102584.1	NW_004973542.1 : 678997 - 717073	anti-sense_lncRNA
MSTRG.102592.1	NW_004973542.1 : 808190 - 812246	anti-sense_lncRNA
MSTRG.102839.1	NW_004973544.1 : 720366 - 721070	anti-sense_lncRNA
MSTRG.102847.3	NW_004973544.1 : 733288 - 733636	anti-sense_lncRNA
MSTRG.102937.1	NW_004973545.1 : 771933 - 830896	anti-sense_lncRNA
MSTRG.102937.2	NW_004973545.1 : 812431 - 858005	anti-sense_lncRNA
MSTRG.102942.1	NW_004973545.1 : 806242 - 826471	anti-sense_lncRNA
MSTRG.103080.1	NW_004973549.1 : 54548 - 57211	anti-sense_lncRNA
MSTRG.103080.2	NW_004973549.1 : 54939 - 57788	anti-sense_lncRNA
MSTRG.103112.2	NW_004973549.1 : 153431 - 154693	anti-sense_lncRNA
MSTRG.103139.1	NW_004973549.1 : 221242 - 221692	anti-sense_lncRNA
MSTRG.103205.1	NW_004973549.1 : 448254 - 451941	anti-sense_lncRNA
MSTRG.103205.2	NW_004973549.1 : 450272 - 451835	anti-sense_lncRNA
MSTRG.103328.1	NW_004973549.1 : 1335374 - 1339370	anti-sense_lncRNA
MSTRG.103328.2	NW_004973549.1 : 1337679 - 1339867	anti-sense_lncRNA
MSTRG.103343.1	NW_004973552.1 : 11744 - 17261	anti-sense_lncRNA
MSTRG.103558.1	NW_004973552.1 : 955369 - 977185	anti-sense_lncRNA
MSTRG.103681.1	NW_004973552.1 : 1211340 - 1212977	anti-sense_lncRNA
MSTRG.103824.1	NW_004973552.1 : 1854673 - 1888393	anti-sense_lncRNA
MSTRG.104125.1	NW_004973552.1 : 3158912 - 3168956	anti-sense_lncRNA
MSTRG.104262.1	NW_004973552.1 : 3868051 - 3910022	anti-sense_lncRNA
MSTRG.104309.3	NW_004973553.1 : 17895 - 128207	anti-sense_lncRNA
MSTRG.104309.4	NW_004973553.1 : 17895 - 129050	anti-sense_lncRNA
MSTRG.104309.6	NW_004973553.1 : 17908 - 128842	anti-sense_lncRNA
MSTRG.104338.1	NW_004973553.1 : 157388 - 248130	anti-sense_lncRNA
MSTRG.104339.1	NW_004973553.1 : 158221 - 161412	anti-sense_lncRNA
MSTRG.10446.1	NW_004973197.1 : 247753 - 272808	anti-sense_lncRNA
MSTRG.10450.1	NW_004973197.1 : 259390 - 278427	anti-sense_lncRNA
MSTRG.104992.1	NW_004973554.1 : 3473924 - 3477228	anti-sense_lncRNA
MSTRG.105156.27	NW_004973555.1 : 1259532 - 1259966	anti-sense_lncRNA
MSTRG.105209.1	NW_004973555.1 : 1362546 - 1408965	anti-sense_lncRNA
MSTRG.105209.2	NW_004973555.1 : 1370815 - 1419282	anti-sense_lncRNA
MSTRG.105359.1	NW_004973557.1 : 816222 - 833193	anti-sense_lncRNA
MSTRG.105420.2	NW_004973557.1 : 1428062 - 1428390	anti-sense_lncRNA
MSTRG.105608.1	NW_004973558.1 : 370781 - 415581	anti-sense_lncRNA
MSTRG.105608.2	NW_004973558.1 : 402960 - 415903	anti-sense_lncRNA
MSTRG.105615.2	NW_004973558.1 : 396107 - 397822	anti-sense_lncRNA
MSTRG.105638.1	NW_004973558.1 : 639926 - 673598	anti-sense_lncRNA
MSTRG.105656.1	NW_004973558.1 : 805541 - 809805	anti-sense_lncRNA
MSTRG.105656.2	NW_004973558.1 : 808032 - 809704	anti-sense_lncRNA
MSTRG.105856.1	NW_004973565.1 : 585304 - 588497	anti-sense_lncRNA
MSTRG.105866.1	NW_004973567.1 : 23615 - 45264	anti-sense_lncRNA
MSTRG.105875.2	NW_004973567.1 : 85394 - 85824	anti-sense_lncRNA
MSTRG.105875.3	NW_004973567.1 : 85394 - 85808	anti-sense_lncRNA
MSTRG.105900.7	NW_004973568.1 : 3836 - 10675	anti-sense_lncRNA
MSTRG.105900.9	NW_004973568.1 : 4609 - 15502	anti-sense_lncRNA
MSTRG.105905.1	NW_004973568.1 : 78279 - 79484	anti-sense_lncRNA
MSTRG.105923.1	NW_004973568.1 : 143047 - 166457	anti-sense_lncRNA
MSTRG.1060.1	NW_004973178.1 : 690151 - 723836	anti-sense_lncRNA
MSTRG.106027.1	NW_004973568.1 : 991648 - 995581	anti-sense_lncRNA
MSTRG.106027.2	NW_004973568.1 : 993468 - 997117	anti-sense_lncRNA
MSTRG.106298.1	NW_004973569.1 : 1122078 - 1126397	anti-sense_lncRNA
MSTRG.106298.2	NW_004973569.1 : 1125993 - 1130314	anti-sense_lncRNA
MSTRG.106310.1	NW_004973569.1 : 1161299 - 1164675	anti-sense_lncRNA
MSTRG.106336.1	NW_004973569.1 : 1257645 - 1259429	anti-sense_lncRNA
MSTRG.106336.2	NW_004973569.1 : 1257811 - 1259429	anti-sense_lncRNA
MSTRG.106336.3	NW_004973569.1 : 1257828 - 1259429	anti-sense_lncRNA
MSTRG.106360.2	NW_004973569.1 : 1415532 - 1417855	anti-sense_lncRNA
MSTRG.106361.1	NW_004973569.1 : 1415773 - 1452000	anti-sense_lncRNA
MSTRG.106576.1	NW_004973569.1 : 2240778 - 2264559	anti-sense_lncRNA
MSTRG.106685.1	NW_004973569.1 : 2860156 - 3343046	anti-sense_lncRNA
MSTRG.106718.2	NW_004973569.1 : 2994134 - 3023088	anti-sense_lncRNA
MSTRG.106718.4	NW_004973569.1 : 3005824 - 3021047	anti-sense_lncRNA
MSTRG.106862.1	NW_004973569.1 : 3431805 - 3434111	anti-sense_lncRNA
MSTRG.106932.2	NW_004973569.1 : 3615023 - 3618302	anti-sense_lncRNA
MSTRG.106932.3	NW_004973569.1 : 3615023 - 3618680	anti-sense_lncRNA
MSTRG.106932.5	NW_004973569.1 : 3615023 - 3618207	anti-sense_lncRNA
MSTRG.106932.9	NW_004973569.1 : 3615778 - 3618207	anti-sense_lncRNA
MSTRG.106939.3	NW_004973569.1 : 3629518 - 3633143	anti-sense_lncRNA
MSTRG.106939.4	NW_004973569.1 : 3630082 - 3633244	anti-sense_lncRNA
MSTRG.106944.1	NW_004973569.1 : 3655084 - 3655541	anti-sense_lncRNA
MSTRG.107092.1	NW_004973571.1 : 731151 - 732467	anti-sense_lncRNA
MSTRG.107104.1	NW_004973573.1 : 10670 - 16715	anti-sense_lncRNA
MSTRG.107262.1	NW_004973575.1 : 170036 - 174310	anti-sense_lncRNA
MSTRG.107262.2	NW_004973575.1 : 172446 - 174408	anti-sense_lncRNA
MSTRG.107293.1	NW_004973575.1 : 322547 - 329355	anti-sense_lncRNA
MSTRG.107300.1	NW_004973575.1 : 331302 - 337743	anti-sense_lncRNA
MSTRG.107301.1	NW_004973575.1 : 332854 - 333179	anti-sense_lncRNA
MSTRG.107362.2	NW_004973575.1 : 570568 - 571245	anti-sense_lncRNA
MSTRG.107421.1	NW_004973575.1 : 779382 - 795402	anti-sense_lncRNA
MSTRG.107473.2	NW_004973575.1 : 1180247 - 1210104	anti-sense_lncRNA
MSTRG.107548.1	NW_004973575.1 : 1420666 - 1422133	anti-sense_lncRNA
MSTRG.107548.2	NW_004973575.1 : 1421187 - 1421628	anti-sense_lncRNA
MSTRG.107550.1	NW_004973575.1 : 1427636 - 1430439	anti-sense_lncRNA
MSTRG.107568.1	NW_004973576.1 : 35461 - 56971	anti-sense_lncRNA
MSTRG.107785.6	NW_004973577.1 : 176000 - 179863	anti-sense_lncRNA
MSTRG.107792.1	NW_004973577.1 : 199464 - 200254	anti-sense_lncRNA
MSTRG.107905.2	NW_004973577.1 : 739332 - 740498	anti-sense_lncRNA
MSTRG.107905.3	NW_004973577.1 : 739846 - 740526	anti-sense_lncRNA
MSTRG.107906.2	NW_004973577.1 : 742977 - 745518	anti-sense_lncRNA
MSTRG.107931.2	NW_004973578.1 : 40924 - 43847	anti-sense_lncRNA
MSTRG.107946.1	NW_004973578.1 : 155975 - 157805	anti-sense_lncRNA
MSTRG.107959.1	NW_004973578.1 : 329979 - 339664	anti-sense_lncRNA
MSTRG.108002.2	NW_004973578.1 : 515307 - 516779	anti-sense_lncRNA
MSTRG.108012.1	NW_004973578.1 : 531101 - 532829	anti-sense_lncRNA
MSTRG.108034.15	NW_004973578.1 : 649435 - 658118	anti-sense_lncRNA
MSTRG.108060.1	NW_004973578.1 : 734315 - 737829	anti-sense_lncRNA
MSTRG.108069.1	NW_004973578.1 : 774859 - 778155	anti-sense_lncRNA
MSTRG.108090.1	NW_004973578.1 : 807840 - 809162	anti-sense_lncRNA
MSTRG.108090.2	NW_004973578.1 : 808675 - 809058	anti-sense_lncRNA
MSTRG.108159.2	NW_004973579.1 : 22118 - 43889	anti-sense_lncRNA
MSTRG.108159.3	NW_004973579.1 : 22133 - 43865	anti-sense_lncRNA
MSTRG.108268.1	NW_004973579.1 : 435638 - 438222	anti-sense_lncRNA
MSTRG.108312.1	NW_004973580.1 : 77804 - 80864	anti-sense_lncRNA
MSTRG.108554.1	NW_004973582.1 : 781992 - 865302	anti-sense_lncRNA
MSTRG.108554.3	NW_004973582.1 : 791350 - 865282	anti-sense_lncRNA
MSTRG.108653.1	NW_004973582.1 : 1862092 - 1894530	anti-sense_lncRNA
MSTRG.108654.1	NW_004973582.1 : 1908179 - 1916338	anti-sense_lncRNA
MSTRG.108664.8	NW_004973582.1 : 2037908 - 2039266	anti-sense_lncRNA
MSTRG.108665.1	NW_004973582.1 : 2003454 - 2017455	anti-sense_lncRNA
MSTRG.108775.1	NW_004973583.1 : 9383 - 15510	anti-sense_lncRNA
MSTRG.108775.2	NW_004973583.1 : 13922 - 34817	anti-sense_lncRNA
MSTRG.108838.2	NW_004973585.1 : 131975 - 136098	anti-sense_lncRNA
MSTRG.108838.3	NW_004973585.1 : 136850 - 138635	anti-sense_lncRNA
MSTRG.108975.1	NW_004973586.1 : 429733 - 459265	anti-sense_lncRNA
MSTRG.109063.10	NW_004973588.1 : 2433 - 64264	anti-sense_lncRNA
MSTRG.109063.39	NW_004973588.1 : 38361 - 134730	anti-sense_lncRNA
MSTRG.109063.43	NW_004973588.1 : 39501 - 134729	anti-sense_lncRNA
MSTRG.109063.45	NW_004973588.1 : 41186 - 134729	anti-sense_lncRNA
MSTRG.109063.46	NW_004973588.1 : 41186 - 134752	anti-sense_lncRNA
MSTRG.109063.5	NW_004973588.1 : 1 - 25512	anti-sense_lncRNA
MSTRG.109063.58	NW_004973588.1 : 41852 - 134729	anti-sense_lncRNA
MSTRG.109063.61	NW_004973588.1 : 41852 - 134729	anti-sense_lncRNA
MSTRG.109063.63	NW_004973588.1 : 41852 - 134729	anti-sense_lncRNA
MSTRG.109063.66	NW_004973588.1 : 41853 - 127271	anti-sense_lncRNA
MSTRG.109063.67	NW_004973588.1 : 41853 - 127271	anti-sense_lncRNA
MSTRG.109063.76	NW_004973588.1 : 83382 - 134727	anti-sense_lncRNA
MSTRG.109063.78	NW_004973588.1 : 84395 - 128015	anti-sense_lncRNA
MSTRG.109063.81	NW_004973588.1 : 84396 - 134752	anti-sense_lncRNA
MSTRG.109063.82	NW_004973588.1 : 84396 - 134727	anti-sense_lncRNA
MSTRG.109063.83	NW_004973588.1 : 84396 - 134730	anti-sense_lncRNA
MSTRG.109063.88	NW_004973588.1 : 84396 - 94489	anti-sense_lncRNA
MSTRG.10914.1	NW_004973198.1 : 34295 - 43452	anti-sense_lncRNA
MSTRG.109200.1	NW_004973590.1 : 40579 - 121816	anti-sense_lncRNA
MSTRG.109210.1	NW_004973590.1 : 190826 - 191808	anti-sense_lncRNA
MSTRG.109336.1	NW_004973593.1 : 226488 - 235694	anti-sense_lncRNA
MSTRG.109336.2	NW_004973593.1 : 226488 - 234404	anti-sense_lncRNA
MSTRG.109403.1	NW_004973595.1 : 54208 - 54866	anti-sense_lncRNA
MSTRG.109408.1	NW_004973595.1 : 58239 - 87841	anti-sense_lncRNA
MSTRG.109467.1	NW_004973595.1 : 175942 - 185782	anti-sense_lncRNA
MSTRG.109468.1	NW_004973595.1 : 189424 - 189741	anti-sense_lncRNA
MSTRG.109526.1	NW_004973595.1 : 528004 - 528452	anti-sense_lncRNA
MSTRG.109550.1	NW_004973595.1 : 581185 - 587812	anti-sense_lncRNA
MSTRG.109550.2	NW_004973595.1 : 581185 - 587765	anti-sense_lncRNA
MSTRG.109550.3	NW_004973595.1 : 581185 - 586108	anti-sense_lncRNA
MSTRG.109670.5	NW_004973595.1 : 1294130 - 1298229	anti-sense_lncRNA
MSTRG.109689.10	NW_004973595.1 : 1323582 - 1327487	anti-sense_lncRNA
MSTRG.109689.9	NW_004973595.1 : 1323582 - 1327487	anti-sense_lncRNA
MSTRG.109711.1	NW_004973595.1 : 1476508 - 1477687	anti-sense_lncRNA
MSTRG.109736.1	NW_004973595.1 : 1588219 - 1590999	anti-sense_lncRNA
MSTRG.10983.1	NW_004973198.1 : 772457 - 814109	anti-sense_lncRNA
MSTRG.109926.1	NW_004973596.1 : 865048 - 865920	anti-sense_lncRNA
MSTRG.109930.22	NW_004973596.1 : 901358 - 906110	anti-sense_lncRNA
MSTRG.10994.4	NW_004973198.1 : 824766 - 828551	anti-sense_lncRNA
MSTRG.110089.1	NW_004973598.1 : 535452 - 535704	anti-sense_lncRNA
MSTRG.110254.1	NW_004973599.1 : 77306 - 78848	anti-sense_lncRNA
MSTRG.110259.2	NW_004973599.1 : 137239 - 152978	anti-sense_lncRNA
MSTRG.110325.1	NW_004973599.1 : 517371 - 518043	anti-sense_lncRNA
MSTRG.110329.1	NW_004973599.1 : 545109 - 613118	anti-sense_lncRNA
MSTRG.110355.1	NW_004973599.1 : 655344 - 655632	anti-sense_lncRNA
MSTRG.110543.1	NW_004973602.1 : 785759 - 788520	anti-sense_lncRNA
MSTRG.110544.1	NW_004973602.1 : 786708 - 789423	anti-sense_lncRNA
MSTRG.110650.1	NW_004973602.1 : 1417910 - 1418701	anti-sense_lncRNA
MSTRG.110706.2	NW_004973602.1 : 2108400 - 2109045	anti-sense_lncRNA
MSTRG.110891.1	NW_004973605.1 : 236849 - 238675	anti-sense_lncRNA
MSTRG.110938.1	NW_004973605.1 : 483601 - 484247	anti-sense_lncRNA
MSTRG.110965.1	NW_004973605.1 : 564807 - 572272	anti-sense_lncRNA
MSTRG.111409.2	NW_004973607.1 : 1814398 - 1837889	anti-sense_lncRNA
MSTRG.111448.1	NW_004973608.1 : 30522 - 108364	anti-sense_lncRNA
MSTRG.111455.1	NW_004973608.1 : 54303 - 103501	anti-sense_lncRNA
MSTRG.111455.2	NW_004973608.1 : 54311 - 97398	anti-sense_lncRNA
MSTRG.111455.3	NW_004973608.1 : 54327 - 103500	anti-sense_lncRNA
MSTRG.111455.4	NW_004973608.1 : 54417 - 97402	anti-sense_lncRNA
MSTRG.11147.1	NW_004973198.1 : 2185891 - 2189638	anti-sense_lncRNA
MSTRG.111487.1	NW_004973609.1 : 342099 - 342570	anti-sense_lncRNA
MSTRG.111503.7	NW_004973609.1 : 448858 - 467164	anti-sense_lncRNA
MSTRG.111503.8	NW_004973609.1 : 450685 - 454539	anti-sense_lncRNA
MSTRG.111543.1	NW_004973609.1 : 638433 - 654238	anti-sense_lncRNA
MSTRG.111557.13	NW_004973609.1 : 879387 - 909675	anti-sense_lncRNA
MSTRG.111557.19	NW_004973609.1 : 938313 - 941312	anti-sense_lncRNA
MSTRG.111557.5	NW_004973609.1 : 871716 - 911403	anti-sense_lncRNA
MSTRG.111557.7	NW_004973609.1 : 871753 - 908832	anti-sense_lncRNA
MSTRG.111557.8	NW_004973609.1 : 871753 - 908832	anti-sense_lncRNA
MSTRG.111906.1	NW_004973611.1 : 25619 - 55136	anti-sense_lncRNA
MSTRG.111907.1	NW_004973611.1 : 39980 - 55457	anti-sense_lncRNA
MSTRG.111915.1	NW_004973611.1 : 86644 - 105028	anti-sense_lncRNA
MSTRG.111919.1	NW_004973611.1 : 138929 - 481219	anti-sense_lncRNA
MSTRG.111989.1	NW_004973614.1 : 49270 - 51746	anti-sense_lncRNA
MSTRG.111989.2	NW_004973614.1 : 50002 - 51828	anti-sense_lncRNA
MSTRG.112030.1	NW_004973614.1 : 184561 - 229048	anti-sense_lncRNA
MSTRG.112031.2	NW_004973614.1 : 198101 - 198972	anti-sense_lncRNA
MSTRG.112035.1	NW_004973614.1 : 232037 - 235188	anti-sense_lncRNA
MSTRG.112035.5	NW_004973614.1 : 235966 - 237498	anti-sense_lncRNA
MSTRG.112037.1	NW_004973614.1 : 238661 - 241625	anti-sense_lncRNA
MSTRG.112039.1	NW_004973614.1 : 247203 - 294853	anti-sense_lncRNA
MSTRG.112041.1	NW_004973614.1 : 291119 - 374206	anti-sense_lncRNA
MSTRG.112076.1	NW_004973614.1 : 804664 - 810215	anti-sense_lncRNA
MSTRG.112080.1	NW_004973614.1 : 841207 - 844356	anti-sense_lncRNA
MSTRG.112138.1	NW_004973614.1 : 1132748 - 1152344	anti-sense_lncRNA
MSTRG.112425.1	NW_004973619.1 : 486643 - 489883	anti-sense_lncRNA
MSTRG.112425.2	NW_004973619.1 : 486643 - 489883	anti-sense_lncRNA
MSTRG.112425.3	NW_004973619.1 : 486643 - 489883	anti-sense_lncRNA
MSTRG.112425.4	NW_004973619.1 : 486643 - 489883	anti-sense_lncRNA
MSTRG.112434.1	NW_004973619.1 : 503986 - 507449	anti-sense_lncRNA
MSTRG.112436.1	NW_004973619.1 : 522900 - 528868	anti-sense_lncRNA
MSTRG.112485.1	NW_004973619.1 : 713604 - 714433	anti-sense_lncRNA
MSTRG.112550.1	NW_004973619.1 : 946726 - 959531	anti-sense_lncRNA
MSTRG.112550.2	NW_004973619.1 : 946726 - 955409	anti-sense_lncRNA
MSTRG.112550.3	NW_004973619.1 : 946768 - 959410	anti-sense_lncRNA
MSTRG.112550.4	NW_004973619.1 : 953127 - 957748	anti-sense_lncRNA
MSTRG.112569.1	NW_004973619.1 : 1027000 - 1043133	anti-sense_lncRNA
MSTRG.112588.1	NW_004973619.1 : 1104430 - 1105272	anti-sense_lncRNA
MSTRG.112615.5	NW_004973619.1 : 1187150 - 1210042	anti-sense_lncRNA
MSTRG.112654.2	NW_004973619.1 : 1300701 - 1321434	anti-sense_lncRNA
MSTRG.112663.1	NW_004973619.1 : 1366471 - 1375666	anti-sense_lncRNA
MSTRG.112669.1	NW_004973619.1 : 1390336 - 1402592	anti-sense_lncRNA
MSTRG.112838.1	NW_004973619.1 : 2086050 - 2093841	anti-sense_lncRNA
MSTRG.112838.2	NW_004973619.1 : 2086133 - 2105597	anti-sense_lncRNA
MSTRG.112859.1	NW_004973619.1 : 2203108 - 2217987	anti-sense_lncRNA
MSTRG.112859.2	NW_004973619.1 : 2205738 - 2217851	anti-sense_lncRNA
MSTRG.112859.3	NW_004973619.1 : 2206646 - 2217840	anti-sense_lncRNA
MSTRG.112859.4	NW_004973619.1 : 2208641 - 2218042	anti-sense_lncRNA
MSTRG.112859.5	NW_004973619.1 : 2209709 - 2218031	anti-sense_lncRNA
MSTRG.112897.1	NW_004973619.1 : 2675508 - 2681993	anti-sense_lncRNA
MSTRG.112897.2	NW_004973619.1 : 2675508 - 2681993	anti-sense_lncRNA
MSTRG.112897.3	NW_004973619.1 : 2675508 - 2681942	anti-sense_lncRNA
MSTRG.112897.4	NW_004973619.1 : 2675508 - 2681920	anti-sense_lncRNA
MSTRG.112897.5	NW_004973619.1 : 2675513 - 2681993	anti-sense_lncRNA
MSTRG.112897.6	NW_004973619.1 : 2675533 - 2681889	anti-sense_lncRNA
MSTRG.112914.1	NW_004973619.1 : 2733692 - 2752688	anti-sense_lncRNA
MSTRG.112954.2	NW_004973619.1 : 2839590 - 2841342	anti-sense_lncRNA
MSTRG.11309.1	NW_004973198.1 : 2996473 - 3033646	anti-sense_lncRNA
MSTRG.11309.16	NW_004973198.1 : 3003833 - 3073632	anti-sense_lncRNA
MSTRG.11309.23	NW_004973198.1 : 3007543 - 3015269	anti-sense_lncRNA
MSTRG.11309.9	NW_004973198.1 : 3003681 - 3050534	anti-sense_lncRNA
MSTRG.113377.1	NW_004973623.1 : 27730 - 28178	anti-sense_lncRNA
MSTRG.113400.39	NW_004973623.1 : 325763 - 373456	anti-sense_lncRNA
MSTRG.113424.1	NW_004973623.1 : 437292 - 449737	anti-sense_lncRNA
MSTRG.11384.1	NW_004973198.1 : 3343908 - 3389393	anti-sense_lncRNA
MSTRG.11384.2	NW_004973198.1 : 3362422 - 3389381	anti-sense_lncRNA
MSTRG.11384.3	NW_004973198.1 : 3365153 - 3389331	anti-sense_lncRNA
MSTRG.11386.4	NW_004973198.1 : 3395951 - 3427938	anti-sense_lncRNA
MSTRG.113930.10	NW_004973624.1 : 933320 - 952697	anti-sense_lncRNA
MSTRG.113930.11	NW_004973624.1 : 934657 - 952697	anti-sense_lncRNA
MSTRG.113930.12	NW_004973624.1 : 934657 - 952697	anti-sense_lncRNA
MSTRG.113930.13	NW_004973624.1 : 935401 - 952705	anti-sense_lncRNA
MSTRG.113930.14	NW_004973624.1 : 935887 - 952701	anti-sense_lncRNA
MSTRG.113930.15	NW_004973624.1 : 935887 - 952701	anti-sense_lncRNA
MSTRG.113930.16	NW_004973624.1 : 936195 - 945034	anti-sense_lncRNA
MSTRG.113930.17	NW_004973624.1 : 938703 - 952709	anti-sense_lncRNA
MSTRG.113930.6	NW_004973624.1 : 928717 - 952771	anti-sense_lncRNA
MSTRG.114117.1	NW_004973627.1 : 162473 - 168048	anti-sense_lncRNA
MSTRG.114266.1	NW_004973627.1 : 748275 - 751277	anti-sense_lncRNA
MSTRG.114271.1	NW_004973627.1 : 756153 - 757099	anti-sense_lncRNA
MSTRG.114323.1	NW_004973628.1 : 618010 - 624528	anti-sense_lncRNA
MSTRG.114360.2	NW_004973630.1 : 75422 - 77235	anti-sense_lncRNA
MSTRG.114360.3	NW_004973630.1 : 75445 - 77130	anti-sense_lncRNA
MSTRG.114360.4	NW_004973630.1 : 75445 - 87391	anti-sense_lncRNA
MSTRG.114360.6	NW_004973630.1 : 79878 - 82005	anti-sense_lncRNA
MSTRG.114444.2	NW_004973632.1 : 57386 - 61588	anti-sense_lncRNA
MSTRG.114505.1	NW_004973633.1 : 89966 - 100052	anti-sense_lncRNA
MSTRG.114505.2	NW_004973633.1 : 98662 - 106862	anti-sense_lncRNA
MSTRG.114505.3	NW_004973633.1 : 100331 - 106740	anti-sense_lncRNA
MSTRG.114505.4	NW_004973633.1 : 102699 - 106939	anti-sense_lncRNA
MSTRG.114505.5	NW_004973633.1 : 103385 - 106923	anti-sense_lncRNA
MSTRG.114505.6	NW_004973633.1 : 103410 - 106937	anti-sense_lncRNA
MSTRG.114509.1	NW_004973633.1 : 112829 - 138230	anti-sense_lncRNA
MSTRG.114516.1	NW_004973633.1 : 206635 - 214508	anti-sense_lncRNA
MSTRG.114548.1	NW_004973633.1 : 404846 - 453352	anti-sense_lncRNA
MSTRG.114551.2	NW_004973633.1 : 510072 - 515584	anti-sense_lncRNA
MSTRG.114553.1	NW_004973633.1 : 475337 - 490267	anti-sense_lncRNA
MSTRG.114555.1	NW_004973633.1 : 497588 - 499728	anti-sense_lncRNA
MSTRG.114580.1	NW_004973633.1 : 673979 - 674861	anti-sense_lncRNA
MSTRG.114600.1	NW_004973635.1 : 77974 - 79072	anti-sense_lncRNA
MSTRG.114613.2	NW_004973635.1 : 134455 - 146913	anti-sense_lncRNA
MSTRG.114704.1	NW_004973636.1 : 425043 - 425958	anti-sense_lncRNA
MSTRG.114836.1	NW_004973636.1 : 848743 - 852395	anti-sense_lncRNA
MSTRG.114890.1	NW_004973637.1 : 2511 - 55595	anti-sense_lncRNA
MSTRG.114893.1	NW_004973637.1 : 17752 - 220901	anti-sense_lncRNA
MSTRG.114893.2	NW_004973637.1 : 17934 - 45295	anti-sense_lncRNA
MSTRG.114896.1	NW_004973637.1 : 37912 - 58854	anti-sense_lncRNA
MSTRG.114899.1	NW_004973637.1 : 92324 - 93592	anti-sense_lncRNA
MSTRG.114903.1	NW_004973637.1 : 289718 - 291277	anti-sense_lncRNA
MSTRG.114916.1	NW_004973637.1 : 410244 - 461723	anti-sense_lncRNA
MSTRG.114917.1	NW_004973637.1 : 413951 - 428206	anti-sense_lncRNA
MSTRG.114919.1	NW_004973637.1 : 428132 - 431049	anti-sense_lncRNA
MSTRG.114921.2	NW_004973637.1 : 480170 - 505793	anti-sense_lncRNA
MSTRG.115201.17	NW_004973640.1 : 556600 - 595729	anti-sense_lncRNA
MSTRG.115201.18	NW_004973640.1 : 560035 - 578884	anti-sense_lncRNA
MSTRG.115234.21	NW_004973640.1 : 748153 - 862376	anti-sense_lncRNA
MSTRG.115236.1	NW_004973640.1 : 702216 - 715096	anti-sense_lncRNA
MSTRG.115236.2	NW_004973640.1 : 702216 - 713414	anti-sense_lncRNA
MSTRG.115256.1	NW_004973640.1 : 897764 - 919448	anti-sense_lncRNA
MSTRG.115278.1	NW_004973640.1 : 953309 - 964130	anti-sense_lncRNA
MSTRG.115514.12	NW_004973640.1 : 2018566 - 2048454	anti-sense_lncRNA
MSTRG.115514.8	NW_004973640.1 : 1982212 - 2048394	anti-sense_lncRNA
MSTRG.115514.9	NW_004973640.1 : 1982659 - 1984105	anti-sense_lncRNA
MSTRG.115537.2	NW_004973640.1 : 2113732 - 2125409	anti-sense_lncRNA
MSTRG.11565.1	NW_004973198.1 : 5379201 - 5381378	anti-sense_lncRNA
MSTRG.115650.1	NW_004973641.1 : 205437 - 206700	anti-sense_lncRNA
MSTRG.115744.1	NW_004973642.1 : 954146 - 955468	anti-sense_lncRNA
MSTRG.115744.2	NW_004973642.1 : 954146 - 954957	anti-sense_lncRNA
MSTRG.1158.1	NW_004973179.1 : 107117 - 114623	anti-sense_lncRNA
MSTRG.115944.1	NW_004973643.1 : 749631 - 750002	anti-sense_lncRNA
MSTRG.115954.2	NW_004973643.1 : 928446 - 940991	anti-sense_lncRNA
MSTRG.115954.5	NW_004973643.1 : 935805 - 940989	anti-sense_lncRNA
MSTRG.115954.6	NW_004973643.1 : 940077 - 940886	anti-sense_lncRNA
MSTRG.1160.1	NW_004973179.1 : 108461 - 109556	anti-sense_lncRNA
MSTRG.116041.1	NW_004973646.1 : 63152 - 167124	anti-sense_lncRNA
MSTRG.116047.1	NW_004973646.1 : 166606 - 176287	anti-sense_lncRNA
MSTRG.116133.1	NW_004973646.1 : 814799 - 1073609	anti-sense_lncRNA
MSTRG.116140.1	NW_004973646.1 : 965616 - 1572302	anti-sense_lncRNA
MSTRG.116144.1	NW_004973646.1 : 1206238 - 1286755	anti-sense_lncRNA
MSTRG.116145.1	NW_004973646.1 : 1210937 - 1229258	anti-sense_lncRNA
MSTRG.116152.1	NW_004973646.1 : 1881203 - 1915419	anti-sense_lncRNA
MSTRG.116159.1	NW_004973646.1 : 1935945 - 1946179	anti-sense_lncRNA
MSTRG.116271.1	NW_004973647.1 : 274736 - 328759	anti-sense_lncRNA
MSTRG.116271.3	NW_004973647.1 : 274736 - 302995	anti-sense_lncRNA
MSTRG.116271.4	NW_004973647.1 : 274736 - 279718	anti-sense_lncRNA
MSTRG.116427.2	NW_004973652.1 : 514401 - 515451	anti-sense_lncRNA
MSTRG.116433.27	NW_004973652.1 : 644153 - 653621	anti-sense_lncRNA
MSTRG.116442.1	NW_004973652.1 : 663712 - 663983	anti-sense_lncRNA
MSTRG.116657.3	NW_004973653.1 : 2053205 - 2081416	anti-sense_lncRNA
MSTRG.116682.1	NW_004973653.1 : 2435183 - 2435647	anti-sense_lncRNA
MSTRG.116703.1	NW_004973653.1 : 3050893 - 3090140	anti-sense_lncRNA
MSTRG.116703.2	NW_004973653.1 : 3050893 - 3123463	anti-sense_lncRNA
MSTRG.116708.1	NW_004973653.1 : 3549009 - 3599258	anti-sense_lncRNA
MSTRG.116709.1	NW_004973653.1 : 3566172 - 4132856	anti-sense_lncRNA
MSTRG.116865.2	NW_004973655.1 : 71211 - 103100	anti-sense_lncRNA
MSTRG.116865.3	NW_004973655.1 : 71284 - 102508	anti-sense_lncRNA
MSTRG.116865.5	NW_004973655.1 : 74898 - 102508	anti-sense_lncRNA
MSTRG.116938.1	NW_004973657.1 : 182483 - 185841	anti-sense_lncRNA
MSTRG.116938.3	NW_004973657.1 : 182483 - 185621	anti-sense_lncRNA
MSTRG.116938.5	NW_004973657.1 : 182923 - 183762	anti-sense_lncRNA
MSTRG.11702.2	NW_004973198.1 : 6231818 - 6233960	anti-sense_lncRNA
MSTRG.11718.10	NW_004973198.1 : 6340658 - 6345544	anti-sense_lncRNA
MSTRG.11718.3	NW_004973198.1 : 6324760 - 6388104	anti-sense_lncRNA
MSTRG.11718.5	NW_004973198.1 : 6324761 - 6335809	anti-sense_lncRNA
MSTRG.11718.6	NW_004973198.1 : 6332395 - 6363892	anti-sense_lncRNA
MSTRG.11718.7	NW_004973198.1 : 6334579 - 6334983	anti-sense_lncRNA
MSTRG.11718.9	NW_004973198.1 : 6340612 - 6345739	anti-sense_lncRNA
MSTRG.117278.2	NW_004973657.1 : 1450831 - 1451216	anti-sense_lncRNA
MSTRG.117298.1	NW_004973657.1 : 1490760 - 1491215	anti-sense_lncRNA
MSTRG.117357.1	NW_004973657.1 : 1695337 - 1698240	anti-sense_lncRNA
MSTRG.117399.1	NW_004973662.1 : 1 - 3483	anti-sense_lncRNA
MSTRG.117401.3	NW_004973662.1 : 6304 - 15232	anti-sense_lncRNA
MSTRG.117401.4	NW_004973662.1 : 8643 - 14725	anti-sense_lncRNA
MSTRG.117449.1	NW_004973662.1 : 296329 - 338063	anti-sense_lncRNA
MSTRG.117449.10	NW_004973662.1 : 330158 - 338048	anti-sense_lncRNA
MSTRG.117449.2	NW_004973662.1 : 306211 - 338288	anti-sense_lncRNA
MSTRG.117449.5	NW_004973662.1 : 308659 - 338053	anti-sense_lncRNA
MSTRG.117449.7	NW_004973662.1 : 312734 - 338043	anti-sense_lncRNA
MSTRG.11747.1	NW_004973198.1 : 6668404 - 6671299	anti-sense_lncRNA
MSTRG.1175.13	NW_004973179.1 : 234407 - 237823	anti-sense_lncRNA
MSTRG.1175.14	NW_004973179.1 : 234418 - 238918	anti-sense_lncRNA
MSTRG.1175.15	NW_004973179.1 : 234439 - 238275	anti-sense_lncRNA
MSTRG.117623.1	NW_004973663.1 : 4373 - 74316	anti-sense_lncRNA
MSTRG.117626.1	NW_004973663.1 : 11869 - 23726	anti-sense_lncRNA
MSTRG.117636.1	NW_004973663.1 : 46957 - 119396	anti-sense_lncRNA
MSTRG.117656.1	NW_004973663.1 : 126687 - 134678	anti-sense_lncRNA
MSTRG.117681.1	NW_004973666.1 : 128631 - 167130	anti-sense_lncRNA
MSTRG.117740.1	NW_004973668.1 : 278085 - 299935	anti-sense_lncRNA
MSTRG.117740.10	NW_004973668.1 : 295464 - 311200	anti-sense_lncRNA
MSTRG.117740.4	NW_004973668.1 : 278085 - 302903	anti-sense_lncRNA
MSTRG.117740.9	NW_004973668.1 : 278085 - 285756	anti-sense_lncRNA
MSTRG.117756.48	NW_004973668.1 : 458925 - 467479	anti-sense_lncRNA
MSTRG.117822.14	NW_004973668.1 : 801044 - 806277	anti-sense_lncRNA
MSTRG.11783.1	NW_004973198.1 : 6944674 - 7236859	anti-sense_lncRNA
MSTRG.11783.2	NW_004973198.1 : 6957005 - 7237769	anti-sense_lncRNA
MSTRG.118157.1	NW_004973668.1 : 2949403 - 2964576	anti-sense_lncRNA
MSTRG.118178.1	NW_004973668.1 : 3036306 - 3036893	anti-sense_lncRNA
MSTRG.118202.1	NW_004973669.1 : 60277 - 64866	anti-sense_lncRNA
MSTRG.118204.1	NW_004973669.1 : 69955 - 72066	anti-sense_lncRNA
MSTRG.118210.1	NW_004973669.1 : 93164 - 93724	anti-sense_lncRNA
MSTRG.118309.1	NW_004973673.1 : 349451 - 350098	anti-sense_lncRNA
MSTRG.118346.1	NW_004973673.1 : 550997 - 561562	anti-sense_lncRNA
MSTRG.11836.1	NW_004973198.1 : 7759011 - 7761879	anti-sense_lncRNA
MSTRG.118427.1	NW_004973673.1 : 1034549 - 1075187	anti-sense_lncRNA
MSTRG.118449.1	NW_004973673.1 : 1070239 - 1128411	anti-sense_lncRNA
MSTRG.1185.1	NW_004973179.1 : 265304 - 766548	anti-sense_lncRNA
MSTRG.118523.1	NW_004973675.1 : 88263 - 94447	anti-sense_lncRNA
MSTRG.118540.1	NW_004973675.1 : 186162 - 186795	anti-sense_lncRNA
MSTRG.118541.1	NW_004973675.1 : 197688 - 205188	anti-sense_lncRNA
MSTRG.11855.1	NW_004973198.1 : 8061413 - 8144205	anti-sense_lncRNA
MSTRG.11867.1	NW_004973198.1 : 8131914 - 8135585	anti-sense_lncRNA
MSTRG.11867.2	NW_004973198.1 : 8131978 - 8135731	anti-sense_lncRNA
MSTRG.118726.1	NW_004973678.1 : 54210 - 56668	anti-sense_lncRNA
MSTRG.118726.3	NW_004973678.1 : 55213 - 55909	anti-sense_lncRNA
MSTRG.118792.1	NW_004973678.1 : 243492 - 244062	anti-sense_lncRNA
MSTRG.118953.1	NW_004973678.1 : 1250028 - 1255084	anti-sense_lncRNA
MSTRG.118968.1	NW_004973678.1 : 1509124 - 1526331	anti-sense_lncRNA
MSTRG.118968.2	NW_004973678.1 : 1513363 - 1526331	anti-sense_lncRNA
MSTRG.118968.3	NW_004973678.1 : 1521156 - 1526331	anti-sense_lncRNA
MSTRG.11904.1	NW_004973198.1 : 8455345 - 8465407	anti-sense_lncRNA
MSTRG.119067.3	NW_004973678.1 : 2007893 - 2013619	anti-sense_lncRNA
MSTRG.119079.1	NW_004973678.1 : 2083483 - 2086919	anti-sense_lncRNA
MSTRG.119139.1	NW_004973678.1 : 2899401 - 3065741	anti-sense_lncRNA
MSTRG.119139.2	NW_004973678.1 : 2943962 - 2985089	anti-sense_lncRNA
MSTRG.119140.1	NW_004973678.1 : 2954646 - 2968829	anti-sense_lncRNA
MSTRG.119159.2	NW_004973679.1 : 19560 - 32030	anti-sense_lncRNA
MSTRG.119183.1	NW_004973680.1 : 70480 - 312349	anti-sense_lncRNA
MSTRG.119239.1	NW_004973680.1 : 559567 - 566022	anti-sense_lncRNA
MSTRG.11926.1	NW_004973198.1 : 8551690 - 8808941	anti-sense_lncRNA
MSTRG.11926.2	NW_004973198.1 : 8552247 - 8619409	anti-sense_lncRNA
MSTRG.119272.1	NW_004973680.1 : 664834 - 673609	anti-sense_lncRNA
MSTRG.119304.1	NW_004973680.1 : 783943 - 872704	anti-sense_lncRNA
MSTRG.119304.2	NW_004973680.1 : 869095 - 873948	anti-sense_lncRNA
MSTRG.119375.1	NW_004973680.1 : 1839233 - 1841121	anti-sense_lncRNA
MSTRG.119397.2	NW_004973680.1 : 2113163 - 2220931	anti-sense_lncRNA
MSTRG.119444.1	NW_004973680.1 : 2257321 - 2263306	anti-sense_lncRNA
MSTRG.119560.22	NW_004973680.1 : 3178092 - 3187257	anti-sense_lncRNA
MSTRG.119604.3	NW_004973680.1 : 3283958 - 3285803	anti-sense_lncRNA
MSTRG.119636.2	NW_004973680.1 : 3369306 - 3369599	anti-sense_lncRNA
MSTRG.119670.2	NW_004973680.1 : 3471081 - 3487530	anti-sense_lncRNA
MSTRG.119688.1	NW_004973680.1 : 3638012 - 3642330	anti-sense_lncRNA
MSTRG.119688.2	NW_004973680.1 : 3638012 - 3642485	anti-sense_lncRNA
MSTRG.119696.1	NW_004973680.1 : 3692653 - 3697199	anti-sense_lncRNA
MSTRG.119705.1	NW_004973680.1 : 3738339 - 3740904	anti-sense_lncRNA
MSTRG.119941.1	NW_004973680.1 : 5257871 - 5258858	anti-sense_lncRNA
MSTRG.119944.1	NW_004973680.1 : 5260843 - 5263265	anti-sense_lncRNA
MSTRG.12000.1	NW_004973198.1 : 9425007 - 9490148	anti-sense_lncRNA
MSTRG.120145.6	NW_004973682.1 : 20714 - 23526	anti-sense_lncRNA
MSTRG.12015.9	NW_004973198.1 : 9649930 - 9650759	anti-sense_lncRNA
MSTRG.120152.1	NW_004973682.1 : 39581 - 41143	anti-sense_lncRNA
MSTRG.120208.1	NW_004973683.1 : 36716 - 37022	anti-sense_lncRNA
MSTRG.120363.1	NW_004973684.1 : 224251 - 227611	anti-sense_lncRNA
MSTRG.120435.3	NW_004973684.1 : 576913 - 577231	anti-sense_lncRNA
MSTRG.120566.1	NW_004973685.1 : 76562 - 82544	anti-sense_lncRNA
MSTRG.120588.2	NW_004973687.1 : 9519 - 30921	anti-sense_lncRNA
MSTRG.120617.2	NW_004973687.1 : 232055 - 237492	anti-sense_lncRNA
MSTRG.120629.1	NW_004973687.1 : 286287 - 289585	anti-sense_lncRNA
MSTRG.120641.1	NW_004973687.1 : 326917 - 354461	anti-sense_lncRNA
MSTRG.120641.2	NW_004973687.1 : 326918 - 355400	anti-sense_lncRNA
MSTRG.120641.3	NW_004973687.1 : 327102 - 337100	anti-sense_lncRNA
MSTRG.120657.1	NW_004973687.1 : 376819 - 377346	anti-sense_lncRNA
MSTRG.120845.1	NW_004973689.1 : 281390 - 283011	anti-sense_lncRNA
MSTRG.12108.1	NW_004973198.1 : 11366428 - 11371134	anti-sense_lncRNA
MSTRG.121321.1	NW_004973689.1 : 2715191 - 2761528	anti-sense_lncRNA
MSTRG.121401.2	NW_004973689.1 : 3204783 - 3207708	anti-sense_lncRNA
MSTRG.121455.1	NW_004973689.1 : 3400330 - 3401347	anti-sense_lncRNA
MSTRG.12148.1	NW_004973198.1 : 11843272 - 11961422	anti-sense_lncRNA
MSTRG.12148.2	NW_004973198.1 : 11843299 - 11896519	anti-sense_lncRNA
MSTRG.121837.1	NW_004973689.1 : 6212459 - 6228751	anti-sense_lncRNA
MSTRG.121852.1	NW_004973689.1 : 6324683 - 6335197	anti-sense_lncRNA
MSTRG.12226.2	NW_004973198.1 : 12941663 - 13018299	anti-sense_lncRNA
MSTRG.123261.1	NW_004973689.1 : 19808798 - 19810415	anti-sense_lncRNA
MSTRG.123445.1	NW_004973689.1 : 22581041 - 22588443	anti-sense_lncRNA
MSTRG.123447.1	NW_004973689.1 : 22601069 - 22602093	anti-sense_lncRNA
MSTRG.123560.1	NW_004973689.1 : 23282243 - 23297689	anti-sense_lncRNA
MSTRG.123573.1	NW_004973689.1 : 23345303 - 23345905	anti-sense_lncRNA
MSTRG.123582.1	NW_004973689.1 : 23377313 - 23379671	anti-sense_lncRNA
MSTRG.123611.1	NW_004973689.1 : 23477128 - 23477434	anti-sense_lncRNA
MSTRG.123634.1	NW_004973691.1 : 49619 - 89277	anti-sense_lncRNA
MSTRG.123656.1	NW_004973691.1 : 164333 - 174405	anti-sense_lncRNA
MSTRG.123708.1	NW_004973692.1 : 26620 - 53302	anti-sense_lncRNA
MSTRG.123708.2	NW_004973692.1 : 31308 - 74599	anti-sense_lncRNA
MSTRG.123708.3	NW_004973692.1 : 51524 - 53302	anti-sense_lncRNA
MSTRG.123708.4	NW_004973692.1 : 68528 - 74551	anti-sense_lncRNA
MSTRG.123713.1	NW_004973692.1 : 49362 - 50610	anti-sense_lncRNA
MSTRG.123715.1	NW_004973692.1 : 58289 - 58701	anti-sense_lncRNA
MSTRG.123726.1	NW_004973692.1 : 78591 - 99846	anti-sense_lncRNA
MSTRG.123761.1	NW_004973692.1 : 147386 - 172903	anti-sense_lncRNA
MSTRG.123761.3	NW_004973692.1 : 152605 - 172888	anti-sense_lncRNA
MSTRG.123761.4	NW_004973692.1 : 167784 - 172903	anti-sense_lncRNA
MSTRG.123948.6	NW_004973693.1 : 615627 - 617507	anti-sense_lncRNA
MSTRG.123952.1	NW_004973693.1 : 619426 - 630801	anti-sense_lncRNA
MSTRG.124079.4	NW_004973695.1 : 1060083 - 1087588	anti-sense_lncRNA
MSTRG.124232.1	NW_004973696.1 : 163094 - 170449	anti-sense_lncRNA
MSTRG.124374.2	NW_004973698.1 : 196871 - 197395	anti-sense_lncRNA
MSTRG.124376.1	NW_004973698.1 : 203103 - 208573	anti-sense_lncRNA
MSTRG.124381.1	NW_004973698.1 : 221918 - 223354	anti-sense_lncRNA
MSTRG.124387.1	NW_004973698.1 : 230840 - 235293	anti-sense_lncRNA
MSTRG.124387.2	NW_004973698.1 : 230896 - 235293	anti-sense_lncRNA
MSTRG.124387.3	NW_004973698.1 : 232517 - 235314	anti-sense_lncRNA
MSTRG.124387.4	NW_004973698.1 : 232527 - 235293	anti-sense_lncRNA
MSTRG.124387.5	NW_004973698.1 : 233473 - 234615	anti-sense_lncRNA
MSTRG.124389.1	NW_004973698.1 : 237753 - 263140	anti-sense_lncRNA
MSTRG.124404.1	NW_004973698.1 : 276992 - 277361	anti-sense_lncRNA
MSTRG.124504.1	NW_004973701.1 : 218025 - 239057	anti-sense_lncRNA
MSTRG.124504.10	NW_004973701.1 : 220856 - 235323	anti-sense_lncRNA
MSTRG.124504.11	NW_004973701.1 : 221074 - 226756	anti-sense_lncRNA
MSTRG.124504.13	NW_004973701.1 : 221074 - 232337	anti-sense_lncRNA
MSTRG.124504.14	NW_004973701.1 : 221074 - 231059	anti-sense_lncRNA
MSTRG.124504.15	NW_004973701.1 : 221074 - 234179	anti-sense_lncRNA
MSTRG.124504.16	NW_004973701.1 : 221074 - 235330	anti-sense_lncRNA
MSTRG.124504.17	NW_004973701.1 : 221074 - 232337	anti-sense_lncRNA
MSTRG.124504.2	NW_004973701.1 : 218285 - 231914	anti-sense_lncRNA
MSTRG.124504.3	NW_004973701.1 : 219580 - 241091	anti-sense_lncRNA
MSTRG.124504.4	NW_004973701.1 : 220243 - 231914	anti-sense_lncRNA
MSTRG.124504.5	NW_004973701.1 : 220283 - 232734	anti-sense_lncRNA
MSTRG.124504.6	NW_004973701.1 : 220544 - 231298	anti-sense_lncRNA
MSTRG.124504.7	NW_004973701.1 : 220544 - 231298	anti-sense_lncRNA
MSTRG.124504.8	NW_004973701.1 : 220578 - 232583	anti-sense_lncRNA
MSTRG.124633.1	NW_004973707.1 : 182106 - 191916	anti-sense_lncRNA
MSTRG.124645.1	NW_004973707.1 : 252004 - 254645	anti-sense_lncRNA
MSTRG.124661.1	NW_004973707.1 : 338887 - 361957	anti-sense_lncRNA
MSTRG.124677.2	NW_004973707.1 : 608929 - 645917	anti-sense_lncRNA
MSTRG.124681.1	NW_004973707.1 : 661533 - 664164	anti-sense_lncRNA
MSTRG.124719.1	NW_004973707.1 : 908053 - 953270	anti-sense_lncRNA
MSTRG.124746.1	NW_004973707.1 : 1138628 - 1155018	anti-sense_lncRNA
MSTRG.124840.1	NW_004973707.1 : 2577151 - 2581308	anti-sense_lncRNA
MSTRG.124853.1	NW_004973707.1 : 2622252 - 2639464	anti-sense_lncRNA
MSTRG.124853.2	NW_004973707.1 : 2622266 - 2632960	anti-sense_lncRNA
MSTRG.124853.3	NW_004973707.1 : 2622356 - 2630943	anti-sense_lncRNA
MSTRG.124879.1	NW_004973709.1 : 10506 - 30904	anti-sense_lncRNA
MSTRG.124896.1	NW_004973709.1 : 193537 - 194415	anti-sense_lncRNA
MSTRG.124898.1	NW_004973709.1 : 194778 - 204986	anti-sense_lncRNA
MSTRG.124986.1	NW_004973711.1 : 92375 - 92776	anti-sense_lncRNA
MSTRG.125254.1	NW_004973717.1 : 1243776 - 1250817	anti-sense_lncRNA
MSTRG.125629.1	NW_004973718.1 : 722460 - 838715	anti-sense_lncRNA
MSTRG.125629.3	NW_004973718.1 : 726561 - 758757	anti-sense_lncRNA
MSTRG.125756.1	NW_004973718.1 : 1171335 - 1176160	anti-sense_lncRNA
MSTRG.125756.2	NW_004973718.1 : 1173541 - 1175765	anti-sense_lncRNA
MSTRG.125775.8	NW_004973718.1 : 1433115 - 1435231	anti-sense_lncRNA
MSTRG.125796.1	NW_004973719.1 : 37368 - 69251	anti-sense_lncRNA
MSTRG.125806.1	NW_004973719.1 : 140449 - 179149	anti-sense_lncRNA
MSTRG.125816.1	NW_004973719.1 : 184686 - 220061	anti-sense_lncRNA
MSTRG.125816.2	NW_004973719.1 : 184723 - 201241	anti-sense_lncRNA
MSTRG.125821.2	NW_004973719.1 : 246362 - 268388	anti-sense_lncRNA
MSTRG.125848.1	NW_004973719.1 : 469794 - 475700	anti-sense_lncRNA
MSTRG.126016.1	NW_004973723.1 : 30542 - 41547	anti-sense_lncRNA
MSTRG.126253.28	NW_004973724.1 : 2205057 - 2207930	anti-sense_lncRNA
MSTRG.126268.1	NW_004973724.1 : 2191102 - 2194908	anti-sense_lncRNA
MSTRG.126272.1	NW_004973724.1 : 2215737 - 2217897	anti-sense_lncRNA
MSTRG.126272.2	NW_004973724.1 : 2216169 - 2217516	anti-sense_lncRNA
MSTRG.126272.3	NW_004973724.1 : 2216341 - 2219199	anti-sense_lncRNA
MSTRG.126324.1	NW_004973726.1 : 247503 - 267424	anti-sense_lncRNA
MSTRG.126325.1	NW_004973726.1 : 259225 - 282875	anti-sense_lncRNA
MSTRG.126340.1	NW_004973726.1 : 652493 - 657463	anti-sense_lncRNA
MSTRG.126386.7	NW_004973729.1 : 77450 - 87794	anti-sense_lncRNA
MSTRG.126542.1	NW_004973729.1 : 956355 - 960471	anti-sense_lncRNA
MSTRG.126542.4	NW_004973729.1 : 956355 - 960278	anti-sense_lncRNA
MSTRG.126542.7	NW_004973729.1 : 956377 - 960307	anti-sense_lncRNA
MSTRG.126611.1	NW_004973729.1 : 1342126 - 1342648	anti-sense_lncRNA
MSTRG.126612.1	NW_004973729.1 : 1351814 - 1354365	anti-sense_lncRNA
MSTRG.126692.1	NW_004973731.1 : 246136 - 256753	anti-sense_lncRNA
MSTRG.126693.1	NW_004973731.1 : 256764 - 290689	anti-sense_lncRNA
MSTRG.126851.1	NW_004973732.1 : 223983 - 224981	anti-sense_lncRNA
MSTRG.126874.1	NW_004973732.1 : 398583 - 493575	anti-sense_lncRNA
MSTRG.127131.6	NW_004973732.1 : 1342810 - 1345449	anti-sense_lncRNA
MSTRG.127136.8	NW_004973732.1 : 1367601 - 1377791	anti-sense_lncRNA
MSTRG.127214.1	NW_004973732.1 : 1701156 - 1847217	anti-sense_lncRNA
MSTRG.127214.2	NW_004973732.1 : 1751056 - 1847217	anti-sense_lncRNA
MSTRG.127234.1	NW_004973734.1 : 16220 - 32534	anti-sense_lncRNA
MSTRG.127234.13	NW_004973734.1 : 16344 - 31786	anti-sense_lncRNA
MSTRG.127234.16	NW_004973734.1 : 22259 - 32598	anti-sense_lncRNA
MSTRG.127234.18	NW_004973734.1 : 22259 - 32534	anti-sense_lncRNA
MSTRG.127234.19	NW_004973734.1 : 22259 - 32534	anti-sense_lncRNA
MSTRG.127234.20	NW_004973734.1 : 22259 - 31786	anti-sense_lncRNA
MSTRG.127234.22	NW_004973734.1 : 22259 - 32534	anti-sense_lncRNA
MSTRG.127234.9	NW_004973734.1 : 16331 - 32263	anti-sense_lncRNA
MSTRG.127627.1	NW_004973740.1 : 237290 - 255881	anti-sense_lncRNA
MSTRG.127633.1	NW_004973740.1 : 248632 - 281100	anti-sense_lncRNA
MSTRG.127638.1	NW_004973740.1 : 291919 - 377759	anti-sense_lncRNA
MSTRG.127638.2	NW_004973740.1 : 302901 - 377743	anti-sense_lncRNA
MSTRG.127638.3	NW_004973740.1 : 302955 - 352582	anti-sense_lncRNA
MSTRG.127649.1	NW_004973740.1 : 391896 - 394926	anti-sense_lncRNA
MSTRG.127695.1	NW_004973740.1 : 584972 - 593914	anti-sense_lncRNA
MSTRG.127716.1	NW_004973740.1 : 633150 - 635169	anti-sense_lncRNA
MSTRG.127716.2	NW_004973740.1 : 633277 - 634926	anti-sense_lncRNA
MSTRG.127720.1	NW_004973740.1 : 637872 - 638162	anti-sense_lncRNA
MSTRG.127729.1	NW_004973740.1 : 651727 - 652765	anti-sense_lncRNA
MSTRG.127738.1	NW_004973740.1 : 721222 - 739738	anti-sense_lncRNA
MSTRG.127797.1	NW_004973740.1 : 1018306 - 1025862	anti-sense_lncRNA
MSTRG.127797.2	NW_004973740.1 : 1018446 - 1019231	anti-sense_lncRNA
MSTRG.127797.3	NW_004973740.1 : 1018446 - 1019548	anti-sense_lncRNA
MSTRG.127802.3	NW_004973742.1 : 18 - 70693	anti-sense_lncRNA
MSTRG.127802.31	NW_004973742.1 : 10472 - 62645	anti-sense_lncRNA
MSTRG.127802.34	NW_004973742.1 : 15135 - 110862	anti-sense_lncRNA
MSTRG.127802.36	NW_004973742.1 : 40681 - 111185	anti-sense_lncRNA
MSTRG.127802.51	NW_004973742.1 : 60664 - 111243	anti-sense_lncRNA
MSTRG.127802.59	NW_004973742.1 : 67933 - 114192	anti-sense_lncRNA
MSTRG.127802.60	NW_004973742.1 : 68435 - 114582	anti-sense_lncRNA
MSTRG.127802.61	NW_004973742.1 : 68435 - 154655	anti-sense_lncRNA
MSTRG.127802.63	NW_004973742.1 : 68435 - 154655	anti-sense_lncRNA
MSTRG.127802.64	NW_004973742.1 : 68562 - 73235	anti-sense_lncRNA
MSTRG.127802.65	NW_004973742.1 : 82451 - 114881	anti-sense_lncRNA
MSTRG.127802.76	NW_004973742.1 : 82616 - 114582	anti-sense_lncRNA
MSTRG.127802.80	NW_004973742.1 : 82996 - 114209	anti-sense_lncRNA
MSTRG.127802.82	NW_004973742.1 : 83418 - 169355	anti-sense_lncRNA
MSTRG.127805.1	NW_004973742.1 : 65381 - 186266	anti-sense_lncRNA
MSTRG.127805.3	NW_004973742.1 : 65470 - 107350	anti-sense_lncRNA
MSTRG.12789.1	NW_004973199.1 : 3780885 - 3795092	anti-sense_lncRNA
MSTRG.12789.2	NW_004973199.1 : 3780885 - 3795092	anti-sense_lncRNA
MSTRG.128074.1	NW_004973746.1 : 37614 - 37954	anti-sense_lncRNA
MSTRG.128303.1	NW_004973748.1 : 1118613 - 1152342	anti-sense_lncRNA
MSTRG.128303.2	NW_004973748.1 : 1118613 - 1186180	anti-sense_lncRNA
MSTRG.128303.3	NW_004973748.1 : 1118625 - 1145412	anti-sense_lncRNA
MSTRG.128303.5	NW_004973748.1 : 1118796 - 1167224	anti-sense_lncRNA
MSTRG.128509.3	NW_004973751.1 : 966102 - 972489	anti-sense_lncRNA
MSTRG.128706.1	NW_004973753.1 : 291260 - 338557	anti-sense_lncRNA
MSTRG.128805.1	NW_004973755.1 : 279652 - 293591	anti-sense_lncRNA
MSTRG.129248.1	NW_004973755.1 : 5047147 - 5087219	anti-sense_lncRNA
MSTRG.129253.1	NW_004973755.1 : 5221639 - 5234390	anti-sense_lncRNA
MSTRG.129638.1	NW_004973760.1 : 1107269 - 1168194	anti-sense_lncRNA
MSTRG.129659.1	NW_004973760.1 : 1245830 - 1287298	anti-sense_lncRNA
MSTRG.129681.1	NW_004973760.1 : 1497786 - 1502065	anti-sense_lncRNA
MSTRG.129694.1	NW_004973760.1 : 1638018 - 1728086	anti-sense_lncRNA
MSTRG.129694.3	NW_004973760.1 : 1670154 - 1728035	anti-sense_lncRNA
MSTRG.129694.4	NW_004973760.1 : 1793899 - 1859121	anti-sense_lncRNA
MSTRG.129694.5	NW_004973760.1 : 1793920 - 1878743	anti-sense_lncRNA
MSTRG.129694.6	NW_004973760.1 : 1802964 - 1849705	anti-sense_lncRNA
MSTRG.129694.7	NW_004973760.1 : 1819251 - 1859169	anti-sense_lncRNA
MSTRG.129694.8	NW_004973760.1 : 1846672 - 1854650	anti-sense_lncRNA
MSTRG.129694.9	NW_004973760.1 : 1846672 - 1848978	anti-sense_lncRNA
MSTRG.129708.1	NW_004973760.1 : 1683233 - 1696298	anti-sense_lncRNA
MSTRG.129716.1	NW_004973760.1 : 1791962 - 1801129	anti-sense_lncRNA
MSTRG.129718.1	NW_004973760.1 : 1798225 - 1864288	anti-sense_lncRNA
MSTRG.129718.2	NW_004973760.1 : 1862080 - 1864291	anti-sense_lncRNA
MSTRG.129718.3	NW_004973760.1 : 1862080 - 1864291	anti-sense_lncRNA
MSTRG.129718.4	NW_004973760.1 : 1862100 - 1864367	anti-sense_lncRNA
MSTRG.129726.5	NW_004973760.1 : 1915591 - 1921931	anti-sense_lncRNA
MSTRG.129728.1	NW_004973760.1 : 1898298 - 1901994	anti-sense_lncRNA
MSTRG.129740.1	NW_004973760.1 : 2073478 - 2100610	anti-sense_lncRNA
MSTRG.129778.6	NW_004973760.1 : 2504172 - 2518451	anti-sense_lncRNA
MSTRG.129785.1	NW_004973760.1 : 2490523 - 2496980	anti-sense_lncRNA
MSTRG.129790.1	NW_004973760.1 : 2524615 - 2543069	anti-sense_lncRNA
MSTRG.129837.1	NW_004973761.1 : 129286 - 138423	anti-sense_lncRNA
MSTRG.129855.1	NW_004973762.1 : 48573 - 65116	anti-sense_lncRNA
MSTRG.129857.1	NW_004973762.1 : 62993 - 87591	anti-sense_lncRNA
MSTRG.129865.1	NW_004973762.1 : 143102 - 156842	anti-sense_lncRNA
MSTRG.130071.1	NW_004973766.1 : 32623 - 45621	anti-sense_lncRNA
MSTRG.130071.2	NW_004973766.1 : 32751 - 45572	anti-sense_lncRNA
MSTRG.1303.1	NW_004973179.1 : 1485279 - 1522379	anti-sense_lncRNA
MSTRG.1303.2	NW_004973179.1 : 1485279 - 1521563	anti-sense_lncRNA
MSTRG.13058.1	NW_004973199.1 : 5167003 - 5173886	anti-sense_lncRNA
MSTRG.130588.12	NW_004973773.1 : 418833 - 427110	anti-sense_lncRNA
MSTRG.130588.4	NW_004973773.1 : 413361 - 426802	anti-sense_lncRNA
MSTRG.130789.1	NW_004973775.1 : 42184 - 43623	anti-sense_lncRNA
MSTRG.130810.2	NW_004973775.1 : 200495 - 201230	anti-sense_lncRNA
MSTRG.130899.1	NW_004973775.1 : 718048 - 724250	anti-sense_lncRNA
MSTRG.130899.2	NW_004973775.1 : 718051 - 758227	anti-sense_lncRNA
MSTRG.130931.1	NW_004973775.1 : 917705 - 922316	anti-sense_lncRNA
MSTRG.130931.2	NW_004973775.1 : 917705 - 922192	anti-sense_lncRNA
MSTRG.130931.3	NW_004973775.1 : 917705 - 922192	anti-sense_lncRNA
MSTRG.130943.38	NW_004973776.1 : 926662 - 990677	anti-sense_lncRNA
MSTRG.130943.39	NW_004973776.1 : 926662 - 990677	anti-sense_lncRNA
MSTRG.130943.42	NW_004973776.1 : 929443 - 1126144	anti-sense_lncRNA
MSTRG.130960.1	NW_004973776.1 : 422161 - 477710	anti-sense_lncRNA
MSTRG.130966.1	NW_004973776.1 : 487201 - 511132	anti-sense_lncRNA
MSTRG.130968.1	NW_004973776.1 : 518440 - 521140	anti-sense_lncRNA
MSTRG.13105.1	NW_004973199.1 : 5685324 - 5713113	anti-sense_lncRNA
MSTRG.13106.2	NW_004973199.1 : 5715906 - 5770359	anti-sense_lncRNA
MSTRG.131138.12	NW_004973777.1 : 708486 - 714901	anti-sense_lncRNA
MSTRG.131153.1	NW_004973777.1 : 578485 - 589941	anti-sense_lncRNA
MSTRG.131153.2	NW_004973777.1 : 583761 - 597824	anti-sense_lncRNA
MSTRG.131210.4	NW_004973777.1 : 883062 - 885774	anti-sense_lncRNA
MSTRG.131210.5	NW_004973777.1 : 883062 - 885975	anti-sense_lncRNA
MSTRG.131227.1	NW_004973778.1 : 6666 - 7614	anti-sense_lncRNA
MSTRG.131545.1	NW_004973781.1 : 2036980 - 2040701	anti-sense_lncRNA
MSTRG.131628.1	NW_004973782.1 : 28932 - 30535	anti-sense_lncRNA
MSTRG.131701.39	NW_004973782.1 : 621959 - 625781	anti-sense_lncRNA
MSTRG.131701.40	NW_004973782.1 : 629444 - 634097	anti-sense_lncRNA
MSTRG.131810.5	NW_004973782.1 : 936744 - 946960	anti-sense_lncRNA
MSTRG.131906.1	NW_004973783.1 : 240011 - 257775	anti-sense_lncRNA
MSTRG.131908.1	NW_004973783.1 : 255728 - 307566	anti-sense_lncRNA
MSTRG.131935.1	NW_004973783.1 : 484548 - 548465	anti-sense_lncRNA
MSTRG.131938.1	NW_004973783.1 : 525782 - 588512	anti-sense_lncRNA
MSTRG.131940.1	NW_004973783.1 : 552384 - 765453	anti-sense_lncRNA
MSTRG.131942.1	NW_004973783.1 : 565952 - 666140	anti-sense_lncRNA
MSTRG.131942.2	NW_004973783.1 : 583898 - 666146	anti-sense_lncRNA
MSTRG.1321.1	NW_004973179.1 : 1562467 - 1563210	anti-sense_lncRNA
MSTRG.132210.1	NW_004973790.1 : 144327 - 149097	anti-sense_lncRNA
MSTRG.132299.1	NW_004973790.1 : 524032 - 531331	anti-sense_lncRNA
MSTRG.132308.8	NW_004973790.1 : 648377 - 649972	anti-sense_lncRNA
MSTRG.132566.3	NW_004973791.1 : 210547 - 270698	anti-sense_lncRNA
MSTRG.132674.1	NW_004973791.1 : 507177 - 520436	anti-sense_lncRNA
MSTRG.132766.1	NW_004973792.1 : 336277 - 367702	anti-sense_lncRNA
MSTRG.132766.2	NW_004973792.1 : 349818 - 367702	anti-sense_lncRNA
MSTRG.132771.1	NW_004973792.1 : 421778 - 511824	anti-sense_lncRNA
MSTRG.132787.1	NW_004973792.1 : 568041 - 569854	anti-sense_lncRNA
MSTRG.132860.1	NW_004973792.1 : 1592639 - 1599584	anti-sense_lncRNA
MSTRG.132866.1	NW_004973792.1 : 1628600 - 1631984	anti-sense_lncRNA
MSTRG.132897.1	NW_004973792.1 : 2003179 - 2007900	anti-sense_lncRNA
MSTRG.132897.2	NW_004973792.1 : 2003201 - 2038011	anti-sense_lncRNA
MSTRG.132897.3	NW_004973792.1 : 2003438 - 2006131	anti-sense_lncRNA
MSTRG.132899.1	NW_004973792.1 : 2027032 - 2035403	anti-sense_lncRNA
MSTRG.133140.1	NW_004973795.1 : 1424902 - 1439207	anti-sense_lncRNA
MSTRG.133183.2	NW_004973796.1 : 29956 - 30590	anti-sense_lncRNA
MSTRG.133187.1	NW_004973796.1 : 33659 - 34371	anti-sense_lncRNA
MSTRG.133192.2	NW_004973796.1 : 39974 - 41134	anti-sense_lncRNA
MSTRG.133214.2	NW_004973799.1 : 64972 - 77973	anti-sense_lncRNA
MSTRG.133214.3	NW_004973799.1 : 65424 - 85329	anti-sense_lncRNA
MSTRG.133289.2	NW_004973809.1 : 149352 - 152849	anti-sense_lncRNA
MSTRG.133478.11	NW_004973809.1 : 1493538 - 1729069	anti-sense_lncRNA
MSTRG.133478.18	NW_004973809.1 : 1530228 - 1663207	anti-sense_lncRNA
MSTRG.133478.20	NW_004973809.1 : 1530906 - 1729069	anti-sense_lncRNA
MSTRG.133478.22	NW_004973809.1 : 1554352 - 1729069	anti-sense_lncRNA
MSTRG.133478.25	NW_004973809.1 : 1671200 - 1729069	anti-sense_lncRNA
MSTRG.133478.26	NW_004973809.1 : 1691916 - 1729069	anti-sense_lncRNA
MSTRG.133478.27	NW_004973809.1 : 1698450 - 1729069	anti-sense_lncRNA
MSTRG.133478.28	NW_004973809.1 : 1698497 - 1729069	anti-sense_lncRNA
MSTRG.133478.29	NW_004973809.1 : 1699426 - 1729069	anti-sense_lncRNA
MSTRG.133478.31	NW_004973809.1 : 1707238 - 1729070	anti-sense_lncRNA
MSTRG.133478.32	NW_004973809.1 : 1707286 - 1729069	anti-sense_lncRNA
MSTRG.133478.33	NW_004973809.1 : 1707296 - 1729069	anti-sense_lncRNA
MSTRG.133478.34	NW_004973809.1 : 1708718 - 1729069	anti-sense_lncRNA
MSTRG.133478.35	NW_004973809.1 : 1708957 - 1729069	anti-sense_lncRNA
MSTRG.133540.3	NW_004973809.1 : 2744281 - 2757748	anti-sense_lncRNA
MSTRG.133540.4	NW_004973809.1 : 2745099 - 2750008	anti-sense_lncRNA
MSTRG.133563.1	NW_004973809.1 : 2946842 - 2964916	anti-sense_lncRNA
MSTRG.133585.1	NW_004973809.1 : 3113439 - 3114680	anti-sense_lncRNA
MSTRG.133801.4	NW_004973809.1 : 4630419 - 4639646	anti-sense_lncRNA
MSTRG.133880.3	NW_004973809.1 : 4894709 - 5027161	anti-sense_lncRNA
MSTRG.133883.1	NW_004973809.1 : 4925632 - 4927596	anti-sense_lncRNA
MSTRG.133885.1	NW_004973809.1 : 4939168 - 4941157	anti-sense_lncRNA
MSTRG.133962.1	NW_004973813.1 : 36950 - 37979	anti-sense_lncRNA
MSTRG.133965.1	NW_004973813.1 : 45387 - 46027	anti-sense_lncRNA
MSTRG.133993.2	NW_004973813.1 : 170031 - 173522	anti-sense_lncRNA
MSTRG.133997.1	NW_004973813.1 : 195537 - 207566	anti-sense_lncRNA
MSTRG.133997.2	NW_004973813.1 : 195544 - 196571	anti-sense_lncRNA
MSTRG.134003.1	NW_004973813.1 : 209348 - 237086	anti-sense_lncRNA
MSTRG.134008.1	NW_004973813.1 : 218094 - 226610	anti-sense_lncRNA
MSTRG.134008.3	NW_004973813.1 : 228320 - 232565	anti-sense_lncRNA
MSTRG.134008.4	NW_004973813.1 : 234753 - 240661	anti-sense_lncRNA
MSTRG.134095.1	NW_004973817.1 : 9837 - 55469	anti-sense_lncRNA
MSTRG.134095.2	NW_004973817.1 : 9837 - 55441	anti-sense_lncRNA
MSTRG.134095.3	NW_004973817.1 : 49282 - 81117	anti-sense_lncRNA
MSTRG.134098.1	NW_004973817.1 : 13514 - 27079	anti-sense_lncRNA
MSTRG.134100.1	NW_004973817.1 : 18043 - 33037	anti-sense_lncRNA
MSTRG.134104.1	NW_004973817.1 : 117369 - 124308	anti-sense_lncRNA
MSTRG.134107.2	NW_004973817.1 : 131247 - 150676	anti-sense_lncRNA
MSTRG.134123.4	NW_004973817.1 : 200868 - 219194	anti-sense_lncRNA
MSTRG.134126.1	NW_004973817.1 : 231929 - 323557	anti-sense_lncRNA
MSTRG.134126.2	NW_004973817.1 : 232218 - 296761	anti-sense_lncRNA
MSTRG.134127.2	NW_004973817.1 : 240414 - 248492	anti-sense_lncRNA
MSTRG.134127.3	NW_004973817.1 : 242418 - 258229	anti-sense_lncRNA
MSTRG.134128.1	NW_004973817.1 : 249996 - 252639	anti-sense_lncRNA
MSTRG.134129.1	NW_004973817.1 : 267292 - 304295	anti-sense_lncRNA
MSTRG.134129.2	NW_004973817.1 : 274490 - 328139	anti-sense_lncRNA
MSTRG.134129.3	NW_004973817.1 : 274505 - 293502	anti-sense_lncRNA
MSTRG.134129.4	NW_004973817.1 : 274514 - 293475	anti-sense_lncRNA
MSTRG.134130.1	NW_004973817.1 : 267859 - 326375	anti-sense_lncRNA
MSTRG.134131.1	NW_004973817.1 : 282877 - 304094	anti-sense_lncRNA
MSTRG.134132.1	NW_004973817.1 : 301580 - 320110	anti-sense_lncRNA
MSTRG.134301.7	NW_004973818.1 : 789045 - 792822	anti-sense_lncRNA
MSTRG.134438.1	NW_004973818.1 : 1470780 - 1515843	anti-sense_lncRNA
MSTRG.134438.2	NW_004973818.1 : 1470780 - 1515843	anti-sense_lncRNA
MSTRG.134438.5	NW_004973818.1 : 1491945 - 1514144	anti-sense_lncRNA
MSTRG.134438.6	NW_004973818.1 : 1492221 - 1515844	anti-sense_lncRNA
MSTRG.134455.1	NW_004973818.1 : 1522200 - 1525191	anti-sense_lncRNA
MSTRG.134489.1	NW_004973819.1 : 165206 - 169932	anti-sense_lncRNA
MSTRG.13450.1	NW_004973199.1 : 7228905 - 7247125	anti-sense_lncRNA
MSTRG.134503.1	NW_004973821.1 : 6099 - 7879	anti-sense_lncRNA
MSTRG.134503.2	NW_004973821.1 : 6162 - 7860	anti-sense_lncRNA
MSTRG.134724.1	NW_004973826.1 : 97805 - 101326	anti-sense_lncRNA
MSTRG.134730.10	NW_004973826.1 : 137314 - 148407	anti-sense_lncRNA
MSTRG.134730.9	NW_004973826.1 : 137307 - 148461	anti-sense_lncRNA
MSTRG.135047.1	NW_004973831.1 : 140707 - 142862	anti-sense_lncRNA
MSTRG.135053.1	NW_004973831.1 : 166244 - 174696	anti-sense_lncRNA
MSTRG.135090.2	NW_004973832.1 : 153078 - 156316	anti-sense_lncRNA
MSTRG.135101.1	NW_004973832.1 : 212525 - 214976	anti-sense_lncRNA
MSTRG.135101.2	NW_004973832.1 : 212525 - 216553	anti-sense_lncRNA
MSTRG.135101.3	NW_004973832.1 : 212525 - 214976	anti-sense_lncRNA
MSTRG.135145.1	NW_004973832.1 : 484125 - 487022	anti-sense_lncRNA
MSTRG.135145.2	NW_004973832.1 : 484196 - 488417	anti-sense_lncRNA
MSTRG.135184.1	NW_004973833.1 : 159108 - 159712	anti-sense_lncRNA
MSTRG.135191.1	NW_004973833.1 : 172549 - 178368	anti-sense_lncRNA
MSTRG.135191.2	NW_004973833.1 : 172549 - 176707	anti-sense_lncRNA
MSTRG.135195.3	NW_004973833.1 : 210508 - 223684	anti-sense_lncRNA
MSTRG.135195.4	NW_004973833.1 : 210510 - 225209	anti-sense_lncRNA
MSTRG.135210.2	NW_004973833.1 : 305899 - 306368	anti-sense_lncRNA
MSTRG.135280.1	NW_004973833.1 : 729530 - 738186	anti-sense_lncRNA
MSTRG.135280.2	NW_004973833.1 : 729684 - 744376	anti-sense_lncRNA
MSTRG.135280.3	NW_004973833.1 : 729709 - 734174	anti-sense_lncRNA
MSTRG.135506.1	NW_004973837.1 : 100509 - 117427	anti-sense_lncRNA
MSTRG.135506.2	NW_004973837.1 : 100571 - 142306	anti-sense_lncRNA
MSTRG.135576.1	NW_004973840.1 : 169361 - 177694	anti-sense_lncRNA
MSTRG.135578.1	NW_004973840.1 : 194791 - 264087	anti-sense_lncRNA
MSTRG.135596.1	NW_004973840.1 : 268805 - 278082	anti-sense_lncRNA
MSTRG.135603.1	NW_004973840.1 : 331143 - 442220	anti-sense_lncRNA
MSTRG.135604.1	NW_004973840.1 : 346528 - 351209	anti-sense_lncRNA
MSTRG.135606.1	NW_004973840.1 : 369520 - 412143	anti-sense_lncRNA
MSTRG.135606.2	NW_004973840.1 : 377662 - 412143	anti-sense_lncRNA
MSTRG.135618.1	NW_004973840.1 : 515003 - 524636	anti-sense_lncRNA
MSTRG.135618.2	NW_004973840.1 : 515162 - 524633	anti-sense_lncRNA
MSTRG.135618.3	NW_004973840.1 : 520779 - 524670	anti-sense_lncRNA
MSTRG.135692.1	NW_004973840.1 : 1081950 - 1173776	anti-sense_lncRNA
MSTRG.135705.1	NW_004973840.1 : 1293723 - 1295698	anti-sense_lncRNA
MSTRG.135837.1	NW_004973847.1 : 716589 - 732639	anti-sense_lncRNA
MSTRG.135843.2	NW_004973847.1 : 790843 - 808617	anti-sense_lncRNA
MSTRG.135843.4	NW_004973847.1 : 790935 - 802894	anti-sense_lncRNA
MSTRG.135849.2	NW_004973847.1 : 828907 - 830256	anti-sense_lncRNA
MSTRG.135873.2	NW_004973847.1 : 924159 - 925806	anti-sense_lncRNA
MSTRG.136104.1	NW_004973847.1 : 2399462 - 2408590	anti-sense_lncRNA
MSTRG.136195.1	NW_004973847.1 : 2666568 - 2666836	anti-sense_lncRNA
MSTRG.136197.1	NW_004973847.1 : 2670212 - 2672783	anti-sense_lncRNA
MSTRG.136218.1	NW_004973847.1 : 2728119 - 2728999	anti-sense_lncRNA
MSTRG.136532.1	NW_004973849.1 : 422925 - 432212	anti-sense_lncRNA
MSTRG.136532.2	NW_004973849.1 : 422973 - 455487	anti-sense_lncRNA
MSTRG.136733.1	NW_004973855.1 : 95087 - 111880	anti-sense_lncRNA
MSTRG.13678.1	NW_004973200.1 : 161030 - 161958	anti-sense_lncRNA
MSTRG.136796.1	NW_004973855.1 : 598938 - 602348	anti-sense_lncRNA
MSTRG.136852.2	NW_004973855.1 : 824458 - 825024	anti-sense_lncRNA
MSTRG.136865.1	NW_004973855.1 : 844258 - 845318	anti-sense_lncRNA
MSTRG.136903.1	NW_004973855.1 : 1056164 - 1058745	anti-sense_lncRNA
MSTRG.136939.2	NW_004973855.1 : 1383394 - 1384648	anti-sense_lncRNA
MSTRG.136984.1	NW_004973855.1 : 1565073 - 1566715	anti-sense_lncRNA
MSTRG.136997.1	NW_004973855.1 : 1627698 - 1635093	anti-sense_lncRNA
MSTRG.137175.1	NW_004973863.1 : 9991 - 13921	anti-sense_lncRNA
MSTRG.137206.1	NW_004973867.1 : 54027 - 55319	anti-sense_lncRNA
MSTRG.137391.3	NW_004973869.1 : 262689 - 263815	anti-sense_lncRNA
MSTRG.137686.1	NW_004973874.1 : 897929 - 909115	anti-sense_lncRNA
MSTRG.137793.1	NW_004973875.1 : 133854 - 151011	anti-sense_lncRNA
MSTRG.13783.9	NW_004973200.1 : 603305 - 604979	anti-sense_lncRNA
MSTRG.13785.1	NW_004973200.1 : 601652 - 602278	anti-sense_lncRNA
MSTRG.137884.20	NW_004973877.1 : 508679 - 529915	anti-sense_lncRNA
MSTRG.137913.2	NW_004973880.1 : 48194 - 53541	anti-sense_lncRNA
MSTRG.137960.1	NW_004973881.1 : 45317 - 51475	anti-sense_lncRNA
MSTRG.13799.1	NW_004973200.1 : 668781 - 672357	anti-sense_lncRNA
MSTRG.137990.1	NW_004973881.1 : 190266 - 190811	anti-sense_lncRNA
MSTRG.137995.1	NW_004973881.1 : 222766 - 228818	anti-sense_lncRNA
MSTRG.137995.2	NW_004973881.1 : 226139 - 228158	anti-sense_lncRNA
MSTRG.137999.1	NW_004973881.1 : 229141 - 229432	anti-sense_lncRNA
MSTRG.138001.1	NW_004973881.1 : 234276 - 235961	anti-sense_lncRNA
MSTRG.138016.7	NW_004973883.1 : 32865 - 33940	anti-sense_lncRNA
MSTRG.138202.1	NW_004973884.1 : 797320 - 798914	anti-sense_lncRNA
MSTRG.138202.2	NW_004973884.1 : 798145 - 799287	anti-sense_lncRNA
MSTRG.138208.1	NW_004973884.1 : 804580 - 805681	anti-sense_lncRNA
MSTRG.138233.1	NW_004973884.1 : 966668 - 968919	anti-sense_lncRNA
MSTRG.138233.2	NW_004973884.1 : 966713 - 968914	anti-sense_lncRNA
MSTRG.138244.38	NW_004973884.1 : 1053957 - 1070078	anti-sense_lncRNA
MSTRG.138256.1	NW_004973884.1 : 1064222 - 1068451	anti-sense_lncRNA
MSTRG.138314.2	NW_004973884.1 : 1331320 - 1334058	anti-sense_lncRNA
MSTRG.138314.3	NW_004973884.1 : 1331320 - 1334062	anti-sense_lncRNA
MSTRG.138314.4	NW_004973884.1 : 1331320 - 1334058	anti-sense_lncRNA
MSTRG.138314.5	NW_004973884.1 : 1331328 - 1334057	anti-sense_lncRNA
MSTRG.138314.6	NW_004973884.1 : 1331341 - 1334062	anti-sense_lncRNA
MSTRG.138337.1	NW_004973884.1 : 1530191 - 1532530	anti-sense_lncRNA
MSTRG.13852.11	NW_004973200.1 : 919367 - 923691	anti-sense_lncRNA
MSTRG.13852.3	NW_004973200.1 : 919246 - 924007	anti-sense_lncRNA
MSTRG.13852.5	NW_004973200.1 : 919299 - 923676	anti-sense_lncRNA
MSTRG.13852.6	NW_004973200.1 : 919305 - 923487	anti-sense_lncRNA
MSTRG.13852.8	NW_004973200.1 : 919312 - 924007	anti-sense_lncRNA
MSTRG.138938.1	NW_004973886.1 : 2371754 - 2373964	anti-sense_lncRNA
MSTRG.139102.1	NW_004973886.1 : 3660405 - 3674966	anti-sense_lncRNA
MSTRG.13914.1	NW_004973200.1 : 1085250 - 1087223	anti-sense_lncRNA
MSTRG.139375.1	NW_004973891.1 : 111560 - 139251	anti-sense_lncRNA
MSTRG.139376.1	NW_004973891.1 : 134077 - 142404	anti-sense_lncRNA
MSTRG.139376.2	NW_004973891.1 : 134112 - 142404	anti-sense_lncRNA
MSTRG.139376.3	NW_004973891.1 : 134123 - 142543	anti-sense_lncRNA
MSTRG.139411.38	NW_004973892.1 : 223984 - 230368	anti-sense_lncRNA
MSTRG.139455.1	NW_004973893.1 : 171297 - 174107	anti-sense_lncRNA
MSTRG.139469.1	NW_004973893.1 : 216663 - 224606	anti-sense_lncRNA
MSTRG.139568.4	NW_004973894.1 : 130155 - 157344	anti-sense_lncRNA
MSTRG.139568.5	NW_004973894.1 : 130155 - 172008	anti-sense_lncRNA
MSTRG.139646.1	NW_004973896.1 : 61148 - 133475	anti-sense_lncRNA
MSTRG.139646.2	NW_004973896.1 : 61164 - 134821	anti-sense_lncRNA
MSTRG.139646.3	NW_004973896.1 : 61385 - 97532	anti-sense_lncRNA
MSTRG.139646.4	NW_004973896.1 : 61425 - 97743	anti-sense_lncRNA
MSTRG.139646.5	NW_004973896.1 : 101287 - 133335	anti-sense_lncRNA
MSTRG.139646.8	NW_004973896.1 : 103628 - 113016	anti-sense_lncRNA
MSTRG.139656.2	NW_004973896.1 : 80444 - 86202	anti-sense_lncRNA
MSTRG.139657.1	NW_004973896.1 : 87793 - 91384	anti-sense_lncRNA
MSTRG.139679.1	NW_004973898.1 : 70716 - 73518	anti-sense_lncRNA
MSTRG.139779.1	NW_004973899.1 : 471 - 26733	anti-sense_lncRNA
MSTRG.139779.2	NW_004973899.1 : 1909 - 21047	anti-sense_lncRNA
MSTRG.139800.1	NW_004973899.1 : 61745 - 62011	anti-sense_lncRNA
MSTRG.139803.1	NW_004973899.1 : 93306 - 99337	anti-sense_lncRNA
MSTRG.139867.1	NW_004973899.1 : 249251 - 250699	anti-sense_lncRNA
MSTRG.139870.1	NW_004973899.1 : 252352 - 253299	anti-sense_lncRNA
MSTRG.139871.1	NW_004973899.1 : 254142 - 255158	anti-sense_lncRNA
MSTRG.139981.1	NW_004973904.1 : 227520 - 251600	anti-sense_lncRNA
MSTRG.140081.6	NW_004973909.1 : 40364 - 75218	anti-sense_lncRNA
MSTRG.140195.1	NW_004973911.1 : 133719 - 144760	anti-sense_lncRNA
MSTRG.140197.1	NW_004973911.1 : 136170 - 137690	anti-sense_lncRNA
MSTRG.140232.1	NW_004973911.1 : 359144 - 361099	anti-sense_lncRNA
MSTRG.140232.2	NW_004973911.1 : 359171 - 362416	anti-sense_lncRNA
MSTRG.140250.1	NW_004973911.1 : 429723 - 432428	anti-sense_lncRNA
MSTRG.140253.1	NW_004973911.1 : 436272 - 456251	anti-sense_lncRNA
MSTRG.140394.3	NW_004973918.1 : 252333 - 276881	anti-sense_lncRNA
MSTRG.140394.7	NW_004973918.1 : 263575 - 269756	anti-sense_lncRNA
MSTRG.140394.8	NW_004973918.1 : 263804 - 269621	anti-sense_lncRNA
MSTRG.140394.9	NW_004973918.1 : 265890 - 269587	anti-sense_lncRNA
MSTRG.140425.1	NW_004973918.1 : 454492 - 457515	anti-sense_lncRNA
MSTRG.140431.2	NW_004973918.1 : 462225 - 477496	anti-sense_lncRNA
MSTRG.140487.1	NW_004973919.1 : 31578 - 53164	anti-sense_lncRNA
MSTRG.140487.2	NW_004973919.1 : 31641 - 57110	anti-sense_lncRNA
MSTRG.140497.1	NW_004973919.1 : 78020 - 97597	anti-sense_lncRNA
MSTRG.140498.1	NW_004973919.1 : 84675 - 166533	anti-sense_lncRNA
MSTRG.140498.2	NW_004973919.1 : 84728 - 166603	anti-sense_lncRNA
MSTRG.140500.2	NW_004973919.1 : 93109 - 122269	anti-sense_lncRNA
MSTRG.140506.1	NW_004973919.1 : 139653 - 160053	anti-sense_lncRNA
MSTRG.140526.1	NW_004973919.1 : 262751 - 324150	anti-sense_lncRNA
MSTRG.140526.2	NW_004973919.1 : 262802 - 274792	anti-sense_lncRNA
MSTRG.140529.2	NW_004973919.1 : 384049 - 393802	anti-sense_lncRNA
MSTRG.140532.1	NW_004973919.1 : 335205 - 372978	anti-sense_lncRNA
MSTRG.140532.2	NW_004973919.1 : 357506 - 372978	anti-sense_lncRNA
MSTRG.140561.1	NW_004973919.1 : 458525 - 459355	anti-sense_lncRNA
MSTRG.140580.1	NW_004973919.1 : 529263 - 534965	anti-sense_lncRNA
MSTRG.140654.1	NW_004973922.1 : 126910 - 204792	anti-sense_lncRNA
MSTRG.140792.1	NW_004973922.1 : 600792 - 607173	anti-sense_lncRNA
MSTRG.140885.2	NW_004973922.1 : 1089497 - 1094503	anti-sense_lncRNA
MSTRG.140925.2	NW_004973922.1 : 1497313 - 1501413	anti-sense_lncRNA
MSTRG.140978.1	NW_004973924.1 : 55987 - 56974	anti-sense_lncRNA
MSTRG.141041.1	NW_004973925.1 : 382829 - 384394	anti-sense_lncRNA
MSTRG.141061.1	NW_004973925.1 : 545281 - 551363	anti-sense_lncRNA
MSTRG.141066.1	NW_004973925.1 : 806907 - 903373	anti-sense_lncRNA
MSTRG.141066.2	NW_004973925.1 : 809203 - 832134	anti-sense_lncRNA
MSTRG.141066.3	NW_004973925.1 : 817575 - 832133	anti-sense_lncRNA
MSTRG.141066.6	NW_004973925.1 : 835314 - 867753	anti-sense_lncRNA
MSTRG.141068.1	NW_004973925.1 : 835925 - 1383387	anti-sense_lncRNA
MSTRG.141068.2	NW_004973925.1 : 1382964 - 1478489	anti-sense_lncRNA
MSTRG.141095.1	NW_004973925.1 : 1279516 - 1319390	anti-sense_lncRNA
MSTRG.141100.1	NW_004973925.1 : 1341394 - 1445020	anti-sense_lncRNA
MSTRG.141102.1	NW_004973925.1 : 1354593 - 1450512	anti-sense_lncRNA
MSTRG.141257.21	NW_004973939.1 : 46372 - 47462	anti-sense_lncRNA
MSTRG.141306.1	NW_004973939.1 : 193244 - 196120	anti-sense_lncRNA
MSTRG.141326.1	NW_004973939.1 : 263818 - 272558	anti-sense_lncRNA
MSTRG.141326.2	NW_004973939.1 : 264047 - 272558	anti-sense_lncRNA
MSTRG.141326.3	NW_004973939.1 : 264062 - 272530	anti-sense_lncRNA
MSTRG.141326.4	NW_004973939.1 : 264801 - 272286	anti-sense_lncRNA
MSTRG.141341.2	NW_004973939.1 : 344047 - 358613	anti-sense_lncRNA
MSTRG.141345.1	NW_004973939.1 : 375753 - 377052	anti-sense_lncRNA
MSTRG.141346.1	NW_004973939.1 : 382387 - 389975	anti-sense_lncRNA
MSTRG.141346.2	NW_004973939.1 : 382387 - 389991	anti-sense_lncRNA
MSTRG.141346.3	NW_004973939.1 : 382409 - 389947	anti-sense_lncRNA
MSTRG.141377.8	NW_004973939.1 : 567670 - 568027	anti-sense_lncRNA
MSTRG.141387.1	NW_004973939.1 : 605360 - 606914	anti-sense_lncRNA
MSTRG.141450.1	NW_004973939.1 : 776305 - 780767	anti-sense_lncRNA
MSTRG.141454.1	NW_004973939.1 : 781300 - 781636	anti-sense_lncRNA
MSTRG.141527.1	NW_004973939.1 : 950555 - 951370	anti-sense_lncRNA
MSTRG.141596.1	NW_004973939.1 : 1148494 - 1153381	anti-sense_lncRNA
MSTRG.1416.1	NW_004973179.1 : 2261851 - 2267612	anti-sense_lncRNA
MSTRG.142053.2	NW_004973953.1 : 247361 - 249560	anti-sense_lncRNA
MSTRG.142167.1	NW_004973953.1 : 556333 - 557023	anti-sense_lncRNA
MSTRG.142175.1	NW_004973953.1 : 571568 - 571839	anti-sense_lncRNA
MSTRG.142214.1	NW_004973953.1 : 651538 - 653630	anti-sense_lncRNA
MSTRG.142245.1	NW_004973956.1 : 39811 - 41187	anti-sense_lncRNA
MSTRG.142245.2	NW_004973956.1 : 39886 - 41149	anti-sense_lncRNA
MSTRG.142326.1	NW_004973960.1 : 57366 - 60233	anti-sense_lncRNA
MSTRG.142326.2	NW_004973960.1 : 58585 - 61605	anti-sense_lncRNA
MSTRG.142326.3	NW_004973960.1 : 59953 - 60722	anti-sense_lncRNA
MSTRG.142337.1	NW_004973960.1 : 85829 - 104283	anti-sense_lncRNA
MSTRG.142345.1	NW_004973960.1 : 127488 - 133296	anti-sense_lncRNA
MSTRG.142352.1	NW_004973960.1 : 158772 - 200596	anti-sense_lncRNA
MSTRG.142508.70	NW_004973967.1 : 209211 - 210365	anti-sense_lncRNA
MSTRG.142518.2	NW_004973967.1 : 194287 - 195520	anti-sense_lncRNA
MSTRG.142519.12	NW_004973967.1 : 201211 - 201614	anti-sense_lncRNA
MSTRG.142520.1	NW_004973967.1 : 202136 - 203674	anti-sense_lncRNA
MSTRG.142520.2	NW_004973967.1 : 202509 - 203088	anti-sense_lncRNA
MSTRG.142568.1	NW_004973971.1 : 19687 - 19942	anti-sense_lncRNA
MSTRG.142571.2	NW_004973971.1 : 24475 - 28498	anti-sense_lncRNA
MSTRG.1427.1	NW_004973179.1 : 2317350 - 2325502	anti-sense_lncRNA
MSTRG.1427.2	NW_004973179.1 : 2317350 - 2324519	anti-sense_lncRNA
MSTRG.1427.3	NW_004973179.1 : 2317393 - 2320656	anti-sense_lncRNA
MSTRG.1427.4	NW_004973179.1 : 2317470 - 2321093	anti-sense_lncRNA
MSTRG.1427.5	NW_004973179.1 : 2317656 - 2324619	anti-sense_lncRNA
MSTRG.1427.6	NW_004973179.1 : 2317679 - 2324519	anti-sense_lncRNA
MSTRG.142722.1	NW_004973980.1 : 176601 - 205545	anti-sense_lncRNA
MSTRG.142743.1	NW_004973980.1 : 443151 - 470297	anti-sense_lncRNA
MSTRG.142750.2	NW_004973980.1 : 591749 - 602157	anti-sense_lncRNA
MSTRG.142935.8	NW_004973996.1 : 129719 - 138125	anti-sense_lncRNA
MSTRG.142935.9	NW_004973996.1 : 131121 - 138142	anti-sense_lncRNA
MSTRG.14295.1	NW_004973200.1 : 3568352 - 3569567	anti-sense_lncRNA
MSTRG.143064.1	NW_004973997.1 : 514725 - 524688	anti-sense_lncRNA
MSTRG.143158.1	NW_004973998.1 : 185129 - 197030	anti-sense_lncRNA
MSTRG.143228.4	NW_004974004.1 : 46329 - 47544	anti-sense_lncRNA
MSTRG.143228.6	NW_004974004.1 : 46487 - 47083	anti-sense_lncRNA
MSTRG.143228.7	NW_004974004.1 : 46499 - 47192	anti-sense_lncRNA
MSTRG.143228.8	NW_004974004.1 : 46500 - 47543	anti-sense_lncRNA
MSTRG.143230.1	NW_004974004.1 : 49396 - 50187	anti-sense_lncRNA
MSTRG.143317.1	NW_004974005.1 : 1094346 - 1118127	anti-sense_lncRNA
MSTRG.143339.1	NW_004974009.1 : 18024 - 19936	anti-sense_lncRNA
MSTRG.143385.1	NW_004974009.1 : 267865 - 277150	anti-sense_lncRNA
MSTRG.143385.2	NW_004974009.1 : 267865 - 273315	anti-sense_lncRNA
MSTRG.143385.3	NW_004974009.1 : 267865 - 276353	anti-sense_lncRNA
MSTRG.143385.4	NW_004974009.1 : 267865 - 277981	anti-sense_lncRNA
MSTRG.143385.5	NW_004974009.1 : 267865 - 277193	anti-sense_lncRNA
MSTRG.143385.6	NW_004974009.1 : 269148 - 273624	anti-sense_lncRNA
MSTRG.143607.1	NW_004974012.1 : 492522 - 505523	anti-sense_lncRNA
MSTRG.143635.1	NW_004974018.1 : 13261 - 17615	anti-sense_lncRNA
MSTRG.14365.1	NW_004973200.1 : 4527838 - 4690419	anti-sense_lncRNA
MSTRG.143762.1	NW_004974022.1 : 106262 - 255853	anti-sense_lncRNA
MSTRG.143785.19	NW_004974022.1 : 494791 - 495397	anti-sense_lncRNA
MSTRG.143807.1	NW_004974022.1 : 677929 - 678881	anti-sense_lncRNA
MSTRG.143809.1	NW_004974022.1 : 703874 - 705040	anti-sense_lncRNA
MSTRG.143818.3	NW_004974022.1 : 782205 - 790269	anti-sense_lncRNA
MSTRG.143818.4	NW_004974022.1 : 782205 - 790269	anti-sense_lncRNA
MSTRG.143818.5	NW_004974022.1 : 782205 - 790269	anti-sense_lncRNA
MSTRG.143818.6	NW_004974022.1 : 782205 - 790269	anti-sense_lncRNA
MSTRG.143818.7	NW_004974022.1 : 782205 - 790266	anti-sense_lncRNA
MSTRG.143882.1	NW_004974022.1 : 1258027 - 1307327	anti-sense_lncRNA
MSTRG.144236.2	NW_004974033.1 : 815181 - 819146	anti-sense_lncRNA
MSTRG.144236.3	NW_004974033.1 : 817768 - 819346	anti-sense_lncRNA
MSTRG.144397.1	NW_004974034.1 : 2489 - 16432	anti-sense_lncRNA
MSTRG.14446.1	NW_004973200.1 : 4763433 - 4777119	anti-sense_lncRNA
MSTRG.14446.10	NW_004973200.1 : 4767338 - 4777063	anti-sense_lncRNA
MSTRG.14446.11	NW_004973200.1 : 4767513 - 4777063	anti-sense_lncRNA
MSTRG.14446.12	NW_004973200.1 : 4767751 - 4777063	anti-sense_lncRNA
MSTRG.14446.2	NW_004973200.1 : 4763433 - 4777063	anti-sense_lncRNA
MSTRG.14446.3	NW_004973200.1 : 4763531 - 4777092	anti-sense_lncRNA
MSTRG.14446.4	NW_004973200.1 : 4763551 - 4777201	anti-sense_lncRNA
MSTRG.14446.5	NW_004973200.1 : 4763551 - 4777119	anti-sense_lncRNA
MSTRG.14446.6	NW_004973200.1 : 4763631 - 4777113	anti-sense_lncRNA
MSTRG.14446.7	NW_004973200.1 : 4766251 - 4777119	anti-sense_lncRNA
MSTRG.14446.8	NW_004973200.1 : 4767215 - 4777201	anti-sense_lncRNA
MSTRG.14446.9	NW_004973200.1 : 4767297 - 4777101	anti-sense_lncRNA
MSTRG.144832.1	NW_004974058.1 : 35683 - 61063	anti-sense_lncRNA
MSTRG.144832.2	NW_004974058.1 : 35705 - 55250	anti-sense_lncRNA
MSTRG.144832.3	NW_004974058.1 : 35705 - 53720	anti-sense_lncRNA
MSTRG.144832.4	NW_004974058.1 : 35734 - 62968	anti-sense_lncRNA
MSTRG.144945.1	NW_004974073.1 : 58719 - 144702	anti-sense_lncRNA
MSTRG.144945.2	NW_004974073.1 : 58954 - 168428	anti-sense_lncRNA
MSTRG.144945.3	NW_004974073.1 : 88587 - 164399	anti-sense_lncRNA
MSTRG.144987.1	NW_004974073.1 : 328939 - 333591	anti-sense_lncRNA
MSTRG.145037.1	NW_004974081.1 : 11461 - 44364	anti-sense_lncRNA
MSTRG.145037.2	NW_004974081.1 : 11463 - 44339	anti-sense_lncRNA
MSTRG.145103.1	NW_004974082.1 : 200705 - 211971	anti-sense_lncRNA
MSTRG.145293.1	NW_004974089.1 : 19262 - 20144	anti-sense_lncRNA
MSTRG.145295.1	NW_004974090.1 : 1787 - 10915	anti-sense_lncRNA
MSTRG.145324.1	NW_004974090.1 : 153308 - 159832	anti-sense_lncRNA
MSTRG.145449.1	NW_004974093.1 : 106897 - 108400	anti-sense_lncRNA
MSTRG.145459.1	NW_004974093.1 : 131963 - 134600	anti-sense_lncRNA
MSTRG.14549.1	NW_004973200.1 : 5203335 - 5259833	anti-sense_lncRNA
MSTRG.145702.1	NW_004974095.1 : 36154 - 94520	anti-sense_lncRNA
MSTRG.145702.2	NW_004974095.1 : 43115 - 94497	anti-sense_lncRNA
MSTRG.145711.1	NW_004974095.1 : 92489 - 100078	anti-sense_lncRNA
MSTRG.145714.1	NW_004974095.1 : 148110 - 168740	anti-sense_lncRNA
MSTRG.145719.1	NW_004974095.1 : 178193 - 182494	anti-sense_lncRNA
MSTRG.145726.1	NW_004974095.1 : 208607 - 209669	anti-sense_lncRNA
MSTRG.145727.1	NW_004974095.1 : 226798 - 227961	anti-sense_lncRNA
MSTRG.145731.1	NW_004974095.1 : 285348 - 301931	anti-sense_lncRNA
MSTRG.145731.2	NW_004974095.1 : 285368 - 302219	anti-sense_lncRNA
MSTRG.145731.3	NW_004974095.1 : 285486 - 302219	anti-sense_lncRNA
MSTRG.145840.1	NW_004974095.1 : 1080078 - 1088723	anti-sense_lncRNA
MSTRG.145865.32	NW_004974095.1 : 1382840 - 1383584	anti-sense_lncRNA
MSTRG.145965.1	NW_004974095.1 : 2021086 - 2026859	anti-sense_lncRNA
MSTRG.146019.2	NW_004974095.1 : 2380280 - 2392334	anti-sense_lncRNA
MSTRG.146098.1	NW_004974095.1 : 2897480 - 2899146	anti-sense_lncRNA
MSTRG.146103.3	NW_004974095.1 : 2926099 - 2927598	anti-sense_lncRNA
MSTRG.146117.1	NW_004974095.1 : 3045139 - 3059643	anti-sense_lncRNA
MSTRG.146117.2	NW_004974095.1 : 3045455 - 3058922	anti-sense_lncRNA
MSTRG.146168.1	NW_004974095.1 : 3274630 - 3288337	anti-sense_lncRNA
MSTRG.146184.1	NW_004974095.1 : 3405181 - 3407770	anti-sense_lncRNA
MSTRG.146249.1	NW_004974095.1 : 3757065 - 3758252	anti-sense_lncRNA
MSTRG.146262.1	NW_004974095.1 : 3801565 - 3802744	anti-sense_lncRNA
MSTRG.146295.1	NW_004974095.1 : 3918851 - 3921209	anti-sense_lncRNA
MSTRG.146360.1	NW_004974095.1 : 4237608 - 4241450	anti-sense_lncRNA
MSTRG.146360.3	NW_004974095.1 : 4237650 - 4240151	anti-sense_lncRNA
MSTRG.146389.19	NW_004974095.1 : 4445792 - 4446987	anti-sense_lncRNA
MSTRG.146422.2	NW_004974096.1 : 52722 - 53209	anti-sense_lncRNA
MSTRG.146438.1	NW_004974098.1 : 1072 - 39812	anti-sense_lncRNA
MSTRG.146440.4	NW_004974098.1 : 3755 - 79838	anti-sense_lncRNA
MSTRG.146447.1	NW_004974098.1 : 71051 - 92870	anti-sense_lncRNA
MSTRG.146629.1	NW_004974099.1 : 1433125 - 1438552	anti-sense_lncRNA
MSTRG.146643.1	NW_004974099.1 : 1656147 - 1659963	anti-sense_lncRNA
MSTRG.146644.1	NW_004974099.1 : 1664697 - 1675576	anti-sense_lncRNA
MSTRG.146652.17	NW_004974099.1 : 1714766 - 1731756	anti-sense_lncRNA
MSTRG.146652.18	NW_004974099.1 : 1716327 - 1724843	anti-sense_lncRNA
MSTRG.14680.1	NW_004973200.1 : 5670235 - 5672262	anti-sense_lncRNA
MSTRG.146809.1	NW_004974099.1 : 2320552 - 2321900	anti-sense_lncRNA
MSTRG.146811.1	NW_004974099.1 : 2352944 - 2355932	anti-sense_lncRNA
MSTRG.146812.1	NW_004974099.1 : 2361120 - 2362118	anti-sense_lncRNA
MSTRG.146826.1	NW_004974099.1 : 2479099 - 2486766	anti-sense_lncRNA
MSTRG.146995.1	NW_004974099.1 : 3733886 - 4208576	anti-sense_lncRNA
MSTRG.14704.1	NW_004973200.1 : 5740909 - 5876001	anti-sense_lncRNA
MSTRG.147082.1	NW_004974103.1 : 89430 - 94003	anti-sense_lncRNA
MSTRG.147111.1	NW_004974103.1 : 243877 - 258473	anti-sense_lncRNA
MSTRG.147192.1	NW_004974107.1 : 59363 - 97955	anti-sense_lncRNA
MSTRG.147192.2	NW_004974107.1 : 59420 - 89370	anti-sense_lncRNA
MSTRG.147192.3	NW_004974107.1 : 86963 - 89375	anti-sense_lncRNA
MSTRG.147194.1	NW_004974107.1 : 64976 - 99509	anti-sense_lncRNA
MSTRG.147205.1	NW_004974107.1 : 130921 - 137090	anti-sense_lncRNA
MSTRG.147244.1	NW_004974107.1 : 365747 - 366340	anti-sense_lncRNA
MSTRG.147248.1	NW_004974107.1 : 399857 - 422662	anti-sense_lncRNA
MSTRG.147248.2	NW_004974107.1 : 400057 - 422572	anti-sense_lncRNA
MSTRG.147264.1	NW_004974107.1 : 524779 - 556788	anti-sense_lncRNA
MSTRG.147267.1	NW_004974107.1 : 550732 - 575212	anti-sense_lncRNA
MSTRG.147594.1	NW_004974123.1 : 4092 - 9957	anti-sense_lncRNA
MSTRG.147598.5	NW_004974123.1 : 19909 - 22166	anti-sense_lncRNA
MSTRG.147598.6	NW_004974123.1 : 26648 - 30952	anti-sense_lncRNA
MSTRG.147638.1	NW_004974124.1 : 2735 - 3700	anti-sense_lncRNA
MSTRG.147684.1	NW_004974124.1 : 117276 - 129367	anti-sense_lncRNA
MSTRG.147709.1	NW_004974124.1 : 227990 - 229682	anti-sense_lncRNA
MSTRG.147709.2	NW_004974124.1 : 228422 - 229035	anti-sense_lncRNA
MSTRG.147726.1	NW_004974124.1 : 275676 - 275936	anti-sense_lncRNA
MSTRG.147757.1	NW_004974126.1 : 9212 - 9810	anti-sense_lncRNA
MSTRG.147768.1	NW_004974127.1 : 17992 - 37046	anti-sense_lncRNA
MSTRG.147771.1	NW_004974127.1 : 40530 - 64290	anti-sense_lncRNA
MSTRG.147806.1	NW_004974130.1 : 16574 - 16877	anti-sense_lncRNA
MSTRG.147821.1	NW_004974133.1 : 1345 - 31370	anti-sense_lncRNA
MSTRG.147841.1	NW_004974133.1 : 129552 - 156041	anti-sense_lncRNA
MSTRG.147848.1	NW_004974133.1 : 162636 - 180398	anti-sense_lncRNA
MSTRG.147848.2	NW_004974133.1 : 162666 - 180394	anti-sense_lncRNA
MSTRG.147848.3	NW_004974133.1 : 166775 - 180491	anti-sense_lncRNA
MSTRG.147865.1	NW_004974134.1 : 24880 - 30676	anti-sense_lncRNA
MSTRG.147868.1	NW_004974134.1 : 33110 - 35809	anti-sense_lncRNA
MSTRG.147873.1	NW_004974134.1 : 58336 - 64245	anti-sense_lncRNA
MSTRG.147926.1	NW_004974140.1 : 195258 - 284983	anti-sense_lncRNA
MSTRG.147928.1	NW_004974140.1 : 236334 - 266034	anti-sense_lncRNA
MSTRG.147928.2	NW_004974140.1 : 236508 - 260801	anti-sense_lncRNA
MSTRG.147929.1	NW_004974140.1 : 271916 - 293785	anti-sense_lncRNA
MSTRG.147958.1	NW_004974144.1 : 14306 - 20723	anti-sense_lncRNA
MSTRG.148169.2	NW_004974150.1 : 177223 - 184651	anti-sense_lncRNA
MSTRG.148169.3	NW_004974150.1 : 181511 - 184651	anti-sense_lncRNA
MSTRG.148265.1	NW_004974151.1 : 90402 - 90859	anti-sense_lncRNA
MSTRG.148304.1	NW_004974151.1 : 374561 - 386676	anti-sense_lncRNA
MSTRG.148423.2	NW_004974151.1 : 794116 - 797747	anti-sense_lncRNA
MSTRG.148423.3	NW_004974151.1 : 794116 - 797747	anti-sense_lncRNA
MSTRG.148631.1	NW_004974174.1 : 40632 - 41000	anti-sense_lncRNA
MSTRG.148672.1	NW_004974174.1 : 147603 - 149547	anti-sense_lncRNA
MSTRG.148695.1	NW_004974174.1 : 218133 - 228444	anti-sense_lncRNA
MSTRG.148725.1	NW_004974176.1 : 8212 - 8543	anti-sense_lncRNA
MSTRG.148784.1	NW_004974179.1 : 122178 - 166128	anti-sense_lncRNA
MSTRG.148784.2	NW_004974179.1 : 146882 - 165853	anti-sense_lncRNA
MSTRG.148784.3	NW_004974179.1 : 146938 - 164595	anti-sense_lncRNA
MSTRG.148784.4	NW_004974179.1 : 147494 - 165454	anti-sense_lncRNA
MSTRG.148996.1	NW_004974214.1 : 19899 - 20619	anti-sense_lncRNA
MSTRG.149033.1	NW_004974218.1 : 57171 - 73471	anti-sense_lncRNA
MSTRG.149042.1	NW_004974218.1 : 96644 - 100168	anti-sense_lncRNA
MSTRG.149163.1	NW_004974221.1 : 207869 - 218545	anti-sense_lncRNA
MSTRG.149200.1	NW_004974221.1 : 418354 - 429034	anti-sense_lncRNA
MSTRG.149200.2	NW_004974221.1 : 418367 - 433175	anti-sense_lncRNA
MSTRG.149259.1	NW_004974228.1 : 82054 - 84102	anti-sense_lncRNA
MSTRG.14928.8	NW_004973200.1 : 7817324 - 7845378	anti-sense_lncRNA
MSTRG.14928.9	NW_004973200.1 : 7817344 - 7845431	anti-sense_lncRNA
MSTRG.149302.2	NW_004974228.1 : 206522 - 207406	anti-sense_lncRNA
MSTRG.149302.3	NW_004974228.1 : 206559 - 207439	anti-sense_lncRNA
MSTRG.149303.1	NW_004974228.1 : 216844 - 219176	anti-sense_lncRNA
MSTRG.149338.2	NW_004974233.1 : 133338 - 166598	anti-sense_lncRNA
MSTRG.149338.3	NW_004974233.1 : 139530 - 215259	anti-sense_lncRNA
MSTRG.149338.4	NW_004974233.1 : 143898 - 215573	anti-sense_lncRNA
MSTRG.149338.5	NW_004974233.1 : 145917 - 215228	anti-sense_lncRNA
MSTRG.149338.6	NW_004974233.1 : 165547 - 215218	anti-sense_lncRNA
MSTRG.149338.7	NW_004974233.1 : 165547 - 215218	anti-sense_lncRNA
MSTRG.149338.8	NW_004974233.1 : 166058 - 170964	anti-sense_lncRNA
MSTRG.149343.1	NW_004974233.1 : 183216 - 187356	anti-sense_lncRNA
MSTRG.149343.2	NW_004974233.1 : 187115 - 189827	anti-sense_lncRNA
MSTRG.149391.1	NW_004974234.1 : 92160 - 153710	anti-sense_lncRNA
MSTRG.149393.1	NW_004974234.1 : 92902 - 96011	anti-sense_lncRNA
MSTRG.149393.2	NW_004974234.1 : 92912 - 96039	anti-sense_lncRNA
MSTRG.149393.3	NW_004974234.1 : 92928 - 107144	anti-sense_lncRNA
MSTRG.149397.1	NW_004974234.1 : 114862 - 162297	anti-sense_lncRNA
MSTRG.149397.2	NW_004974234.1 : 114876 - 143584	anti-sense_lncRNA
MSTRG.149482.2	NW_004974238.1 : 542907 - 543685	anti-sense_lncRNA
MSTRG.14958.1	NW_004973200.1 : 7947603 - 7952333	anti-sense_lncRNA
MSTRG.149689.1	NW_004974241.1 : 676532 - 690032	anti-sense_lncRNA
MSTRG.149750.2	NW_004974242.1 : 71522 - 74491	anti-sense_lncRNA
MSTRG.149750.3	NW_004974242.1 : 71536 - 74489	anti-sense_lncRNA
MSTRG.149758.7	NW_004974242.1 : 122491 - 141440	anti-sense_lncRNA
MSTRG.149774.1	NW_004974242.1 : 188443 - 191629	anti-sense_lncRNA
MSTRG.149790.1	NW_004974242.1 : 287240 - 291095	anti-sense_lncRNA
MSTRG.149844.1	NW_004974242.1 : 543375 - 552375	anti-sense_lncRNA
MSTRG.149904.1	NW_004974242.1 : 985186 - 1035534	anti-sense_lncRNA
MSTRG.14996.1	NW_004973200.1 : 8135363 - 8149765	anti-sense_lncRNA
MSTRG.14996.2	NW_004973200.1 : 8135363 - 8149717	anti-sense_lncRNA
MSTRG.14996.4	NW_004973200.1 : 8135364 - 8149765	anti-sense_lncRNA
MSTRG.14996.5	NW_004973200.1 : 8135364 - 8149727	anti-sense_lncRNA
MSTRG.14996.6	NW_004973200.1 : 8135514 - 8149727	anti-sense_lncRNA
MSTRG.150044.1	NW_004974249.1 : 299151 - 300235	anti-sense_lncRNA
MSTRG.150066.1	NW_004974249.1 : 357607 - 379866	anti-sense_lncRNA
MSTRG.150216.1	NW_004974269.1 : 19231 - 27395	anti-sense_lncRNA
MSTRG.150276.1	NW_004974284.1 : 9710 - 10697	anti-sense_lncRNA
MSTRG.150358.1	NW_004974298.1 : 111774 - 112874	anti-sense_lncRNA
MSTRG.150384.1	NW_004974303.1 : 1981 - 22045	anti-sense_lncRNA
MSTRG.150421.1	NW_004974321.1 : 18533 - 45459	anti-sense_lncRNA
MSTRG.150428.1	NW_004974321.1 : 62249 - 160064	anti-sense_lncRNA
MSTRG.150433.1	NW_004974321.1 : 126143 - 155025	anti-sense_lncRNA
MSTRG.150492.1	NW_004974336.1 : 24347 - 43399	anti-sense_lncRNA
MSTRG.150496.1	NW_004974336.1 : 65666 - 73371	anti-sense_lncRNA
MSTRG.150499.1	NW_004974336.1 : 84897 - 93278	anti-sense_lncRNA
MSTRG.150521.1	NW_004974336.1 : 132157 - 132940	anti-sense_lncRNA
MSTRG.150646.2	NW_004974361.1 : 40205 - 47407	anti-sense_lncRNA
MSTRG.150646.3	NW_004974361.1 : 40576 - 47430	anti-sense_lncRNA
MSTRG.150799.1	NW_004974378.1 : 62744 - 63086	anti-sense_lncRNA
MSTRG.150912.1	NW_004974391.1 : 65950 - 66831	anti-sense_lncRNA
MSTRG.150927.6	NW_004974391.1 : 94968 - 98565	anti-sense_lncRNA
MSTRG.151042.2	NW_004974408.1 : 1191 - 11455	anti-sense_lncRNA
MSTRG.151072.1	NW_004974408.1 : 99139 - 110580	anti-sense_lncRNA
MSTRG.151072.2	NW_004974408.1 : 99143 - 110702	anti-sense_lncRNA
MSTRG.151137.2	NW_004974409.1 : 11641 - 11876	anti-sense_lncRNA
MSTRG.151185.1	NW_004974418.1 : 1090 - 9701	anti-sense_lncRNA
MSTRG.151193.1	NW_004974418.1 : 45456 - 50464	anti-sense_lncRNA
MSTRG.151279.26	NW_004974432.1 : 91626 - 92204	anti-sense_lncRNA
MSTRG.151279.27	NW_004974432.1 : 96708 - 173265	anti-sense_lncRNA
MSTRG.151279.28	NW_004974432.1 : 96708 - 103360	anti-sense_lncRNA
MSTRG.151279.34	NW_004974432.1 : 96779 - 103391	anti-sense_lncRNA
MSTRG.151327.1	NW_004974440.1 : 73030 - 131721	anti-sense_lncRNA
MSTRG.151376.2	NW_004974440.1 : 394633 - 396621	anti-sense_lncRNA
MSTRG.151628.2	NW_004974476.1 : 578468 - 645477	anti-sense_lncRNA
MSTRG.151647.1	NW_004974476.1 : 823290 - 830954	anti-sense_lncRNA
MSTRG.151674.6	NW_004974477.1 : 274517 - 367963	anti-sense_lncRNA
MSTRG.151837.1	NW_004974482.1 : 41039 - 41378	anti-sense_lncRNA
MSTRG.151847.1	NW_004974489.1 : 12380 - 101936	anti-sense_lncRNA
MSTRG.151847.2	NW_004974489.1 : 57787 - 101955	anti-sense_lncRNA
MSTRG.151849.1	NW_004974489.1 : 23506 - 60510	anti-sense_lncRNA
MSTRG.151852.1	NW_004974489.1 : 47264 - 99795	anti-sense_lncRNA
MSTRG.151852.2	NW_004974489.1 : 99391 - 111237	anti-sense_lncRNA
MSTRG.151854.1	NW_004974489.1 : 53636 - 69553	anti-sense_lncRNA
MSTRG.152015.2	NW_004974491.1 : 1261112 - 1282849	anti-sense_lncRNA
MSTRG.152070.1	NW_004974491.1 : 1749621 - 1750590	anti-sense_lncRNA
MSTRG.152074.1	NW_004974491.1 : 1768429 - 1794817	anti-sense_lncRNA
MSTRG.152074.2	NW_004974491.1 : 1768489 - 1769719	anti-sense_lncRNA
MSTRG.152144.1	NW_004974491.1 : 2611339 - 2621831	anti-sense_lncRNA
MSTRG.152161.7	NW_004974491.1 : 2759592 - 2769612	anti-sense_lncRNA
MSTRG.152329.43	NW_004974491.1 : 4167606 - 4173686	anti-sense_lncRNA
MSTRG.152342.15	NW_004974491.1 : 4313222 - 4332357	anti-sense_lncRNA
MSTRG.152476.3	NW_004974491.1 : 4895816 - 4932563	anti-sense_lncRNA
MSTRG.152502.1	NW_004974491.1 : 4945118 - 4978245	anti-sense_lncRNA
MSTRG.152502.2	NW_004974491.1 : 4963888 - 4996773	anti-sense_lncRNA
MSTRG.152502.3	NW_004974491.1 : 4964170 - 4965038	anti-sense_lncRNA
MSTRG.152502.4	NW_004974491.1 : 4964298 - 4981228	anti-sense_lncRNA
MSTRG.152556.1	NW_004974491.1 : 5502171 - 5609213	anti-sense_lncRNA
MSTRG.15262.1	NW_004973202.1 : 532889 - 533500	anti-sense_lncRNA
MSTRG.15262.2	NW_004973202.1 : 532931 - 533502	anti-sense_lncRNA
MSTRG.152635.4	NW_004974491.1 : 5961419 - 5975009	anti-sense_lncRNA
MSTRG.152635.5	NW_004974491.1 : 5961486 - 5969981	anti-sense_lncRNA
MSTRG.15264.1	NW_004973202.1 : 537239 - 548148	anti-sense_lncRNA
MSTRG.15266.1	NW_004973202.1 : 546692 - 547216	anti-sense_lncRNA
MSTRG.152698.1	NW_004974494.1 : 214372 - 215861	anti-sense_lncRNA
MSTRG.152740.1	NW_004974495.1 : 100187 - 102808	anti-sense_lncRNA
MSTRG.152943.1	NW_004974510.1 : 55979 - 108580	anti-sense_lncRNA
MSTRG.152950.1	NW_004974510.1 : 133196 - 147184	anti-sense_lncRNA
MSTRG.153021.1	NW_004974511.1 : 14811 - 21992	anti-sense_lncRNA
MSTRG.153182.1	NW_004974521.1 : 334166 - 356501	anti-sense_lncRNA
MSTRG.153353.1	NW_004974534.1 : 4749 - 28930	anti-sense_lncRNA
MSTRG.153353.2	NW_004974534.1 : 17809 - 22679	anti-sense_lncRNA
MSTRG.153353.3	NW_004974534.1 : 17809 - 22679	anti-sense_lncRNA
MSTRG.153386.1	NW_004974534.1 : 121304 - 135596	anti-sense_lncRNA
MSTRG.153580.2	NW_004974594.1 : 50781 - 52532	anti-sense_lncRNA
MSTRG.153655.1	NW_004974612.1 : 322 - 4488	anti-sense_lncRNA
MSTRG.153655.2	NW_004974612.1 : 3489 - 4823	anti-sense_lncRNA
MSTRG.153658.2	NW_004974612.1 : 5114 - 5844	anti-sense_lncRNA
MSTRG.153677.2	NW_004974613.1 : 35793 - 39670	anti-sense_lncRNA
MSTRG.153689.1	NW_004974613.1 : 115315 - 182567	anti-sense_lncRNA
MSTRG.153690.1	NW_004974613.1 : 123892 - 164747	anti-sense_lncRNA
MSTRG.153762.1	NW_004974654.1 : 33810 - 37021	anti-sense_lncRNA
MSTRG.153801.1	NW_004974676.1 : 28376 - 34053	anti-sense_lncRNA
MSTRG.153855.1	NW_004974676.1 : 229532 - 231946	anti-sense_lncRNA
MSTRG.153855.3	NW_004974676.1 : 229957 - 231946	anti-sense_lncRNA
MSTRG.153977.1	NW_004974684.1 : 27122 - 33303	anti-sense_lncRNA
MSTRG.154053.1	NW_004974692.1 : 31041 - 31572	anti-sense_lncRNA
MSTRG.154084.1	NW_004974696.1 : 6183 - 9688	anti-sense_lncRNA
MSTRG.154084.2	NW_004974696.1 : 7299 - 7713	anti-sense_lncRNA
MSTRG.154088.1	NW_004974696.1 : 24566 - 43262	anti-sense_lncRNA
MSTRG.154088.2	NW_004974696.1 : 24566 - 38574	anti-sense_lncRNA
MSTRG.154214.1	NW_004974753.1 : 37331 - 90932	anti-sense_lncRNA
MSTRG.154218.1	NW_004974753.1 : 43212 - 46851	anti-sense_lncRNA
MSTRG.154228.1	NW_004974753.1 : 76406 - 81665	anti-sense_lncRNA
MSTRG.154229.1	NW_004974753.1 : 88494 - 108832	anti-sense_lncRNA
MSTRG.154231.1	NW_004974753.1 : 102317 - 129497	anti-sense_lncRNA
MSTRG.154234.1	NW_004974753.1 : 118128 - 165139	anti-sense_lncRNA
MSTRG.154234.2	NW_004974753.1 : 118173 - 156725	anti-sense_lncRNA
MSTRG.154402.1	NW_004974783.1 : 165259 - 216397	anti-sense_lncRNA
MSTRG.154402.2	NW_004974783.1 : 176134 - 200294	anti-sense_lncRNA
MSTRG.154402.3	NW_004974783.1 : 176134 - 216397	anti-sense_lncRNA
MSTRG.154810.1	NW_004974867.1 : 11293 - 15102	anti-sense_lncRNA
MSTRG.154900.1	NW_004974914.1 : 120831 - 121414	anti-sense_lncRNA
MSTRG.154931.1	NW_004974914.1 : 209816 - 210502	anti-sense_lncRNA
MSTRG.155127.1	NW_004975040.1 : 10544 - 12906	anti-sense_lncRNA
MSTRG.155152.1	NW_004975072.1 : 9037 - 17736	anti-sense_lncRNA
MSTRG.155152.2	NW_004975072.1 : 9224 - 17674	anti-sense_lncRNA
MSTRG.155156.1	NW_004975072.1 : 31573 - 44253	anti-sense_lncRNA
MSTRG.155157.1	NW_004975072.1 : 34517 - 42429	anti-sense_lncRNA
MSTRG.155194.2	NW_004975072.1 : 256052 - 269709	anti-sense_lncRNA
MSTRG.155194.3	NW_004975072.1 : 257200 - 269953	anti-sense_lncRNA
MSTRG.155194.4	NW_004975072.1 : 263195 - 269748	anti-sense_lncRNA
MSTRG.155196.1	NW_004975072.1 : 201118 - 206783	anti-sense_lncRNA
MSTRG.155197.1	NW_004975072.1 : 205916 - 250709	anti-sense_lncRNA
MSTRG.155197.2	NW_004975072.1 : 205916 - 250639	anti-sense_lncRNA
MSTRG.155239.2	NW_004975072.1 : 418926 - 477804	anti-sense_lncRNA
MSTRG.155245.1	NW_004975072.1 : 494876 - 495538	anti-sense_lncRNA
MSTRG.155323.1	NW_004975106.1 : 5484 - 10302	anti-sense_lncRNA
MSTRG.155464.6	NW_004975212.1 : 8258 - 9866	anti-sense_lncRNA
MSTRG.155465.1	NW_004975212.1 : 10955 - 11781	anti-sense_lncRNA
MSTRG.155592.1	NW_004975396.1 : 22000 - 22399	anti-sense_lncRNA
MSTRG.155676.1	NW_004975472.1 : 3502 - 19200	anti-sense_lncRNA
MSTRG.155687.1	NW_004975472.1 : 81437 - 143014	anti-sense_lncRNA
MSTRG.155708.1	NW_004975485.1 : 19174 - 19925	anti-sense_lncRNA
MSTRG.15580.1	NW_004973203.1 : 3828996 - 3839220	anti-sense_lncRNA
MSTRG.155802.1	NW_004975612.1 : 4721 - 5651	anti-sense_lncRNA
MSTRG.155802.4	NW_004975612.1 : 4728 - 5627	anti-sense_lncRNA
MSTRG.155802.5	NW_004975612.1 : 4728 - 5627	anti-sense_lncRNA
MSTRG.155802.6	NW_004975612.1 : 4728 - 5627	anti-sense_lncRNA
MSTRG.155802.7	NW_004975612.1 : 4742 - 5627	anti-sense_lncRNA
MSTRG.155802.8	NW_004975612.1 : 4742 - 5627	anti-sense_lncRNA
MSTRG.155802.9	NW_004975612.1 : 4742 - 5627	anti-sense_lncRNA
MSTRG.156284.1	NW_004976105.1 : 460 - 822	anti-sense_lncRNA
MSTRG.156546.4	NW_004976531.1 : 74025 - 89377	anti-sense_lncRNA
MSTRG.15942.1	NW_004973207.1 : 611721 - 614233	anti-sense_lncRNA
MSTRG.15983.1	NW_004973207.1 : 812837 - 815403	anti-sense_lncRNA
MSTRG.160656.26	NW_004988091.1 : 334791 - 343561	anti-sense_lncRNA
MSTRG.160656.27	NW_004988091.1 : 336046 - 340768	anti-sense_lncRNA
MSTRG.160672.1	NW_004988091.1 : 392879 - 398944	anti-sense_lncRNA
MSTRG.160681.1	NW_004988091.1 : 469531 - 506640	anti-sense_lncRNA
MSTRG.160681.2	NW_004988091.1 : 469547 - 489345	anti-sense_lncRNA
MSTRG.160681.5	NW_004988091.1 : 473864 - 476641	anti-sense_lncRNA
MSTRG.160750.1	NW_004988091.1 : 1268706 - 1273988	anti-sense_lncRNA
MSTRG.160750.2	NW_004988091.1 : 1269316 - 1273113	anti-sense_lncRNA
MSTRG.160945.1	NW_004988092.1 : 194975 - 208157	anti-sense_lncRNA
MSTRG.161035.1	NW_004988092.1 : 1597065 - 1603092	anti-sense_lncRNA
MSTRG.16376.1	NW_004973209.1 : 680542 - 682450	anti-sense_lncRNA
MSTRG.16376.2	NW_004973209.1 : 680581 - 683513	anti-sense_lncRNA
MSTRG.16438.2	NW_004973209.1 : 1259645 - 1261435	anti-sense_lncRNA
MSTRG.1645.1	NW_004973180.1 : 525414 - 529048	anti-sense_lncRNA
MSTRG.16459.5	NW_004973209.1 : 1330154 - 1333623	anti-sense_lncRNA
MSTRG.16461.1	NW_004973209.1 : 1335378 - 1339201	anti-sense_lncRNA
MSTRG.1647.1	NW_004973180.1 : 529098 - 532742	anti-sense_lncRNA
MSTRG.16592.1	NW_004973210.1 : 193834 - 288556	anti-sense_lncRNA
MSTRG.16614.2	NW_004973211.1 : 1 - 4221	anti-sense_lncRNA
MSTRG.16766.1	NW_004973211.1 : 1075101 - 1079229	anti-sense_lncRNA
MSTRG.16998.54	NW_004973211.1 : 2226272 - 2288927	anti-sense_lncRNA
MSTRG.16998.59	NW_004973211.1 : 2260545 - 2293223	anti-sense_lncRNA
MSTRG.16998.61	NW_004973211.1 : 2264660 - 2299414	anti-sense_lncRNA
MSTRG.16998.62	NW_004973211.1 : 2296627 - 2300901	anti-sense_lncRNA
MSTRG.17075.2	NW_004973211.1 : 2368712 - 2386251	anti-sense_lncRNA
MSTRG.17112.1	NW_004973211.1 : 2720674 - 2778135	anti-sense_lncRNA
MSTRG.17192.20	NW_004973211.1 : 3258290 - 3259192	anti-sense_lncRNA
MSTRG.17532.2	NW_004973212.1 : 641621 - 651921	anti-sense_lncRNA
MSTRG.17587.1	NW_004973212.1 : 1212745 - 1214039	anti-sense_lncRNA
MSTRG.17590.18	NW_004973212.1 : 1237967 - 1239732	anti-sense_lncRNA
MSTRG.17593.1	NW_004973212.1 : 1231053 - 1233257	anti-sense_lncRNA
MSTRG.17593.2	NW_004973212.1 : 1231053 - 1233297	anti-sense_lncRNA
MSTRG.1792.1	NW_004973180.1 : 1435967 - 1439485	anti-sense_lncRNA
MSTRG.18121.1	NW_004973214.1 : 598846 - 623755	anti-sense_lncRNA
MSTRG.18133.1	NW_004973214.1 : 742542 - 747580	anti-sense_lncRNA
MSTRG.18134.1	NW_004973214.1 : 751532 - 754048	anti-sense_lncRNA
MSTRG.18134.3	NW_004973214.1 : 754500 - 757178	anti-sense_lncRNA
MSTRG.18134.8	NW_004973214.1 : 755815 - 758526	anti-sense_lncRNA
MSTRG.18234.1	NW_004973215.1 : 643677 - 645433	anti-sense_lncRNA
MSTRG.18269.1	NW_004973215.1 : 740758 - 786204	anti-sense_lncRNA
MSTRG.18270.1	NW_004973215.1 : 741350 - 749683	anti-sense_lncRNA
MSTRG.18270.3	NW_004973215.1 : 741386 - 763942	anti-sense_lncRNA
MSTRG.18270.5	NW_004973215.1 : 741404 - 745704	anti-sense_lncRNA
MSTRG.18270.6	NW_004973215.1 : 746479 - 747708	anti-sense_lncRNA
MSTRG.18506.1	NW_004973216.1 : 1503033 - 1503754	anti-sense_lncRNA
MSTRG.18506.2	NW_004973216.1 : 1503281 - 1503816	anti-sense_lncRNA
MSTRG.18806.1	NW_004973218.1 : 2071002 - 2133416	anti-sense_lncRNA
MSTRG.18806.3	NW_004973218.1 : 2125469 - 2133416	anti-sense_lncRNA
MSTRG.18808.1	NW_004973218.1 : 2121578 - 2125723	anti-sense_lncRNA
MSTRG.1912.4	NW_004973181.1 : 10525 - 11243	anti-sense_lncRNA
MSTRG.1918.1	NW_004973181.1 : 52314 - 63106	anti-sense_lncRNA
MSTRG.1918.3	NW_004973181.1 : 52314 - 63077	anti-sense_lncRNA
MSTRG.1918.6	NW_004973181.1 : 52314 - 63063	anti-sense_lncRNA
MSTRG.1918.9	NW_004973181.1 : 52314 - 63056	anti-sense_lncRNA
MSTRG.19955.1	NW_004973223.1 : 1075224 - 1078423	anti-sense_lncRNA
MSTRG.19984.1	NW_004973223.1 : 1254511 - 1259134	anti-sense_lncRNA
MSTRG.1999.1	NW_004973181.1 : 2722558 - 2740688	anti-sense_lncRNA
MSTRG.19997.2	NW_004973223.1 : 1448277 - 1451126	anti-sense_lncRNA
MSTRG.20027.1	NW_004973223.1 : 1725801 - 1728892	anti-sense_lncRNA
MSTRG.20094.48	NW_004973223.1 : 2770860 - 2783467	anti-sense_lncRNA
MSTRG.20117.15	NW_004973223.1 : 2826352 - 2840617	anti-sense_lncRNA
MSTRG.20117.16	NW_004973223.1 : 2832983 - 2840515	anti-sense_lncRNA
MSTRG.2053.18	NW_004973182.1 : 223746 - 232106	anti-sense_lncRNA
MSTRG.2053.19	NW_004973182.1 : 223746 - 231004	anti-sense_lncRNA
MSTRG.2053.20	NW_004973182.1 : 225666 - 230955	anti-sense_lncRNA
MSTRG.2053.21	NW_004973182.1 : 228134 - 232106	anti-sense_lncRNA
MSTRG.20577.1	NW_004973224.1 : 19859 - 20550	anti-sense_lncRNA
MSTRG.20577.4	NW_004973224.1 : 21177 - 21512	anti-sense_lncRNA
MSTRG.2076.2	NW_004973182.1 : 337029 - 340460	anti-sense_lncRNA
MSTRG.2077.1	NW_004973182.1 : 339860 - 351262	anti-sense_lncRNA
MSTRG.20930.1	NW_004973225.1 : 645831 - 650048	anti-sense_lncRNA
MSTRG.21059.2	NW_004973226.1 : 158550 - 178282	anti-sense_lncRNA
MSTRG.21186.1	NW_004973226.1 : 909960 - 910809	anti-sense_lncRNA
MSTRG.21194.1	NW_004973226.1 : 930060 - 968498	anti-sense_lncRNA
MSTRG.21194.2	NW_004973226.1 : 930076 - 968498	anti-sense_lncRNA
MSTRG.21194.3	NW_004973226.1 : 934356 - 990203	anti-sense_lncRNA
MSTRG.21194.4	NW_004973226.1 : 936289 - 1025164	anti-sense_lncRNA
MSTRG.21203.1	NW_004973226.1 : 951194 - 967414	anti-sense_lncRNA
MSTRG.21492.1	NW_004973227.1 : 776554 - 803844	anti-sense_lncRNA
MSTRG.21502.1	NW_004973227.1 : 1042807 - 1064399	anti-sense_lncRNA
MSTRG.21681.2	NW_004973227.1 : 4026945 - 4027374	anti-sense_lncRNA
MSTRG.21927.56	NW_004973228.1 : 463721 - 568240	anti-sense_lncRNA
MSTRG.21927.58	NW_004973228.1 : 464200 - 569847	anti-sense_lncRNA
MSTRG.21927.62	NW_004973228.1 : 488348 - 499691	anti-sense_lncRNA
MSTRG.21933.1	NW_004973228.1 : 426724 - 427138	anti-sense_lncRNA
MSTRG.21984.1	NW_004973228.1 : 804606 - 805495	anti-sense_lncRNA
MSTRG.22057.3	NW_004973228.1 : 1431375 - 1464456	anti-sense_lncRNA
MSTRG.22072.1	NW_004973228.1 : 1525652 - 1529525	anti-sense_lncRNA
MSTRG.22076.10	NW_004973228.1 : 1571427 - 1573987	anti-sense_lncRNA
MSTRG.22076.7	NW_004973228.1 : 1569321 - 1576228	anti-sense_lncRNA
MSTRG.22247.1	NW_004973228.1 : 2013586 - 2070742	anti-sense_lncRNA
MSTRG.22295.1	NW_004973228.1 : 2255684 - 2351350	anti-sense_lncRNA
MSTRG.22295.3	NW_004973228.1 : 2280433 - 2351495	anti-sense_lncRNA
MSTRG.22305.6	NW_004973228.1 : 2417345 - 2419618	anti-sense_lncRNA
MSTRG.22306.1	NW_004973228.1 : 2437340 - 2441110	anti-sense_lncRNA
MSTRG.22322.1	NW_004973228.1 : 2495688 - 2543800	anti-sense_lncRNA
MSTRG.22335.1	NW_004973228.1 : 2523163 - 2525791	anti-sense_lncRNA
MSTRG.22350.1	NW_004973228.1 : 2550895 - 2552222	anti-sense_lncRNA
MSTRG.22373.1	NW_004973228.1 : 2786103 - 2793224	anti-sense_lncRNA
MSTRG.22432.1	NW_004973228.1 : 3055784 - 3076414	anti-sense_lncRNA
MSTRG.22432.2	NW_004973228.1 : 3057075 - 3074068	anti-sense_lncRNA
MSTRG.22459.1	NW_004973228.1 : 3506823 - 3553379	anti-sense_lncRNA
MSTRG.22713.1	NW_004973229.1 : 178120 - 195821	anti-sense_lncRNA
MSTRG.22992.1	NW_004973231.1 : 1956181 - 1972876	anti-sense_lncRNA
MSTRG.23380.1	NW_004973232.1 : 2703970 - 2737619	anti-sense_lncRNA
MSTRG.23394.1	NW_004973232.1 : 2765300 - 2829220	anti-sense_lncRNA
MSTRG.23401.1	NW_004973232.1 : 2896099 - 3234848	anti-sense_lncRNA
MSTRG.23408.1	NW_004973232.1 : 3009003 - 3039714	anti-sense_lncRNA
MSTRG.23426.1	NW_004973232.1 : 3367861 - 3817489	anti-sense_lncRNA
MSTRG.23429.1	NW_004973232.1 : 3663337 - 3729508	anti-sense_lncRNA
MSTRG.23433.1	NW_004973232.1 : 3729286 - 3781337	anti-sense_lncRNA
MSTRG.23434.2	NW_004973232.1 : 3744841 - 3817773	anti-sense_lncRNA
MSTRG.23435.1	NW_004973232.1 : 3749870 - 3761408	anti-sense_lncRNA
MSTRG.23436.2	NW_004973232.1 : 3845001 - 3886502	anti-sense_lncRNA
MSTRG.23438.1	NW_004973232.1 : 3787689 - 3871569	anti-sense_lncRNA
MSTRG.23440.1	NW_004973232.1 : 3846526 - 3920019	anti-sense_lncRNA
MSTRG.23457.1	NW_004973234.1 : 121818 - 124077	anti-sense_lncRNA
MSTRG.23525.1	NW_004973234.1 : 868831 - 869414	anti-sense_lncRNA
MSTRG.23572.1	NW_004973234.1 : 1037476 - 1039990	anti-sense_lncRNA
MSTRG.24.1	NW_004973173.1 : 89767 - 101868	anti-sense_lncRNA
MSTRG.24.2	NW_004973173.1 : 94233 - 101868	anti-sense_lncRNA
MSTRG.24106.2	NW_004973234.1 : 3653425 - 3658255	anti-sense_lncRNA
MSTRG.24422.2	NW_004973235.1 : 1824823 - 2370986	anti-sense_lncRNA
MSTRG.24426.11	NW_004973235.1 : 2496008 - 2527960	anti-sense_lncRNA
MSTRG.24426.12	NW_004973235.1 : 2595130 - 2649058	anti-sense_lncRNA
MSTRG.24426.2	NW_004973235.1 : 1915809 - 2007844	anti-sense_lncRNA
MSTRG.24426.3	NW_004973235.1 : 1915831 - 1943487	anti-sense_lncRNA
MSTRG.24426.4	NW_004973235.1 : 1938846 - 2204116	anti-sense_lncRNA
MSTRG.24426.5	NW_004973235.1 : 1957330 - 2010659	anti-sense_lncRNA
MSTRG.24426.6	NW_004973235.1 : 1972081 - 2045912	anti-sense_lncRNA
MSTRG.24426.7	NW_004973235.1 : 1972081 - 2045728	anti-sense_lncRNA
MSTRG.24426.9	NW_004973235.1 : 1975577 - 2045728	anti-sense_lncRNA
MSTRG.24429.1	NW_004973235.1 : 1979048 - 2347714	anti-sense_lncRNA
MSTRG.24447.2	NW_004973235.1 : 2523444 - 2536168	anti-sense_lncRNA
MSTRG.24463.1	NW_004973235.1 : 2688912 - 2721742	anti-sense_lncRNA
MSTRG.24481.1	NW_004973235.1 : 2948621 - 2970766	anti-sense_lncRNA
MSTRG.24481.2	NW_004973235.1 : 2948710 - 2998007	anti-sense_lncRNA
MSTRG.24483.1	NW_004973235.1 : 2972466 - 3000575	anti-sense_lncRNA
MSTRG.24483.2	NW_004973235.1 : 2982421 - 3000599	anti-sense_lncRNA
MSTRG.24485.2	NW_004973235.1 : 3013572 - 3017362	anti-sense_lncRNA
MSTRG.24487.1	NW_004973235.1 : 3033281 - 3034606	anti-sense_lncRNA
MSTRG.24488.1	NW_004973235.1 : 3039026 - 3047424	anti-sense_lncRNA
MSTRG.24489.2	NW_004973235.1 : 3048282 - 3064370	anti-sense_lncRNA
MSTRG.24490.1	NW_004973235.1 : 3048665 - 3055628	anti-sense_lncRNA
MSTRG.24497.1	NW_004973235.1 : 3314262 - 3370049	anti-sense_lncRNA
MSTRG.24521.1	NW_004973235.1 : 3897071 - 3934685	anti-sense_lncRNA
MSTRG.24524.1	NW_004973235.1 : 3910806 - 3952637	anti-sense_lncRNA
MSTRG.24525.1	NW_004973235.1 : 3941971 - 3948460	anti-sense_lncRNA
MSTRG.24526.1	NW_004973235.1 : 3951929 - 4029828	anti-sense_lncRNA
MSTRG.24530.1	NW_004973235.1 : 4073576 - 4123746	anti-sense_lncRNA
MSTRG.24531.1	NW_004973235.1 : 4154283 - 4200593	anti-sense_lncRNA
MSTRG.24549.1	NW_004973235.1 : 4352795 - 4380993	anti-sense_lncRNA
MSTRG.24557.1	NW_004973235.1 : 4406942 - 4418631	anti-sense_lncRNA
MSTRG.24557.2	NW_004973235.1 : 4407908 - 4418612	anti-sense_lncRNA
MSTRG.24574.1	NW_004973235.1 : 4458371 - 4464013	anti-sense_lncRNA
MSTRG.24581.1	NW_004973235.1 : 4498318 - 4573302	anti-sense_lncRNA
MSTRG.24581.2	NW_004973235.1 : 4508941 - 4542388	anti-sense_lncRNA
MSTRG.24581.3	NW_004973235.1 : 4508943 - 4564957	anti-sense_lncRNA
MSTRG.24583.1	NW_004973235.1 : 4510202 - 4604745	anti-sense_lncRNA
MSTRG.24587.1	NW_004973235.1 : 4529276 - 4534295	anti-sense_lncRNA
MSTRG.24588.1	NW_004973235.1 : 4536094 - 4574323	anti-sense_lncRNA
MSTRG.24606.1	NW_004973235.1 : 4755320 - 4755846	anti-sense_lncRNA
MSTRG.24608.1	NW_004973235.1 : 4764929 - 4811250	anti-sense_lncRNA
MSTRG.24609.1	NW_004973235.1 : 4765237 - 4802032	anti-sense_lncRNA
MSTRG.24611.1	NW_004973235.1 : 4782470 - 4823245	anti-sense_lncRNA
MSTRG.24612.1	NW_004973235.1 : 4814354 - 4875676	anti-sense_lncRNA
MSTRG.24613.1	NW_004973235.1 : 4816265 - 4874167	anti-sense_lncRNA
MSTRG.24614.3	NW_004973235.1 : 4960329 - 4974661	anti-sense_lncRNA
MSTRG.24614.4	NW_004973235.1 : 4963498 - 4972725	anti-sense_lncRNA
MSTRG.24618.1	NW_004973235.1 : 4884305 - 4911025	anti-sense_lncRNA
MSTRG.2462.2	NW_004973182.1 : 2257927 - 2263386	anti-sense_lncRNA
MSTRG.2462.3	NW_004973182.1 : 2258006 - 2259256	anti-sense_lncRNA
MSTRG.24624.3	NW_004973235.1 : 4968058 - 5040359	anti-sense_lncRNA
MSTRG.24629.1	NW_004973235.1 : 4973970 - 4981645	anti-sense_lncRNA
MSTRG.24633.1	NW_004973235.1 : 5012703 - 5076116	anti-sense_lncRNA
MSTRG.24649.1	NW_004973235.1 : 5165239 - 5168772	anti-sense_lncRNA
MSTRG.24679.2	NW_004973236.1 : 107171 - 108903	anti-sense_lncRNA
MSTRG.24724.3	NW_004973236.1 : 229563 - 299543	anti-sense_lncRNA
MSTRG.24725.1	NW_004973236.1 : 236488 - 305515	anti-sense_lncRNA
MSTRG.24810.2	NW_004973236.1 : 514181 - 580565	anti-sense_lncRNA
MSTRG.24810.3	NW_004973236.1 : 514183 - 580562	anti-sense_lncRNA
MSTRG.24810.4	NW_004973236.1 : 519733 - 580572	anti-sense_lncRNA
MSTRG.24810.5	NW_004973236.1 : 549992 - 580572	anti-sense_lncRNA
MSTRG.24810.6	NW_004973236.1 : 550002 - 580572	anti-sense_lncRNA
MSTRG.24904.1	NW_004973236.1 : 837284 - 838830	anti-sense_lncRNA
MSTRG.25183.1	NW_004973237.1 : 959867 - 967075	anti-sense_lncRNA
MSTRG.25318.1	NW_004973237.1 : 1672961 - 1793218	anti-sense_lncRNA
MSTRG.25364.1	NW_004973237.1 : 1875190 - 1875496	anti-sense_lncRNA
MSTRG.25389.1	NW_004973237.1 : 1965975 - 1969034	anti-sense_lncRNA
MSTRG.25391.7	NW_004973237.1 : 1969321 - 1971833	anti-sense_lncRNA
MSTRG.25421.1	NW_004973237.1 : 2097712 - 2098728	anti-sense_lncRNA
MSTRG.2543.1	NW_004973182.1 : 2656496 - 2667127	anti-sense_lncRNA
MSTRG.2543.2	NW_004973182.1 : 2659313 - 2666428	anti-sense_lncRNA
MSTRG.25450.1	NW_004973237.1 : 2195907 - 2198629	anti-sense_lncRNA
MSTRG.25503.3	NW_004973238.1 : 480434 - 528698	anti-sense_lncRNA
MSTRG.25682.1	NW_004973241.1 : 65157 - 78602	anti-sense_lncRNA
MSTRG.25704.7	NW_004973242.1 : 28529 - 30677	anti-sense_lncRNA
MSTRG.25754.1	NW_004973242.1 : 159377 - 176912	anti-sense_lncRNA
MSTRG.25754.2	NW_004973242.1 : 159449 - 166213	anti-sense_lncRNA
MSTRG.25754.3	NW_004973242.1 : 159506 - 160294	anti-sense_lncRNA
MSTRG.25777.15	NW_004973242.1 : 348352 - 354280	anti-sense_lncRNA
MSTRG.25777.9	NW_004973242.1 : 343096 - 354280	anti-sense_lncRNA
MSTRG.25778.1	NW_004973242.1 : 354635 - 355450	anti-sense_lncRNA
MSTRG.25875.1	NW_004973242.1 : 848514 - 853329	anti-sense_lncRNA
MSTRG.25907.1	NW_004973242.1 : 1310798 - 1330693	anti-sense_lncRNA
MSTRG.26224.1	NW_004973243.1 : 1051695 - 1063983	anti-sense_lncRNA
MSTRG.26317.1	NW_004973244.1 : 106296 - 115132	anti-sense_lncRNA
MSTRG.2633.1	NW_004973182.1 : 3042071 - 3059949	anti-sense_lncRNA
MSTRG.26590.1	NW_004973244.1 : 2520177 - 2535455	anti-sense_lncRNA
MSTRG.2660.1	NW_004973182.1 : 3299595 - 3300604	anti-sense_lncRNA
MSTRG.2662.1	NW_004973182.1 : 3303952 - 3304833	anti-sense_lncRNA
MSTRG.2662.2	NW_004973182.1 : 3304268 - 3304823	anti-sense_lncRNA
MSTRG.26736.1	NW_004973244.1 : 3104801 - 3106358	anti-sense_lncRNA
MSTRG.2693.1	NW_004973182.1 : 3531493 - 3532952	anti-sense_lncRNA
MSTRG.27031.1	NW_004973247.1 : 218583 - 226110	anti-sense_lncRNA
MSTRG.2707.4	NW_004973182.1 : 3582600 - 3585734	anti-sense_lncRNA
MSTRG.27094.1	NW_004973247.1 : 765953 - 766725	anti-sense_lncRNA
MSTRG.2710.1	NW_004973182.1 : 3603398 - 3607770	anti-sense_lncRNA
MSTRG.27111.1	NW_004973247.1 : 801731 - 804568	anti-sense_lncRNA
MSTRG.27119.1	NW_004973247.1 : 822304 - 823669	anti-sense_lncRNA
MSTRG.27156.1	NW_004973247.1 : 1119847 - 1120897	anti-sense_lncRNA
MSTRG.27159.1	NW_004973247.1 : 1128541 - 1138606	anti-sense_lncRNA
MSTRG.27218.2	NW_004973249.1 : 65283 - 163985	anti-sense_lncRNA
MSTRG.27218.3	NW_004973249.1 : 65519 - 163987	anti-sense_lncRNA
MSTRG.27231.1	NW_004973249.1 : 120771 - 209552	anti-sense_lncRNA
MSTRG.27235.1	NW_004973249.1 : 135509 - 194629	anti-sense_lncRNA
MSTRG.27240.1	NW_004973249.1 : 146264 - 202780	anti-sense_lncRNA
MSTRG.27240.2	NW_004973249.1 : 146610 - 218154	anti-sense_lncRNA
MSTRG.27240.3	NW_004973249.1 : 162000 - 218120	anti-sense_lncRNA
MSTRG.27242.1	NW_004973249.1 : 160278 - 169767	anti-sense_lncRNA
MSTRG.27246.1	NW_004973249.1 : 204702 - 248344	anti-sense_lncRNA
MSTRG.27247.1	NW_004973249.1 : 211578 - 245295	anti-sense_lncRNA
MSTRG.27248.1	NW_004973249.1 : 213742 - 221085	anti-sense_lncRNA
MSTRG.27248.2	NW_004973249.1 : 213823 - 221100	anti-sense_lncRNA
MSTRG.27249.1	NW_004973249.1 : 228584 - 249880	anti-sense_lncRNA
MSTRG.27251.1	NW_004973249.1 : 231051 - 331245	anti-sense_lncRNA
MSTRG.27262.1	NW_004973249.1 : 492873 - 513630	anti-sense_lncRNA
MSTRG.27263.1	NW_004973249.1 : 494708 - 514782	anti-sense_lncRNA
MSTRG.27264.1	NW_004973249.1 : 514358 - 525664	anti-sense_lncRNA
MSTRG.27266.2	NW_004973249.1 : 565765 - 578360	anti-sense_lncRNA
MSTRG.27268.1	NW_004973249.1 : 590022 - 605786	anti-sense_lncRNA
MSTRG.27269.1	NW_004973249.1 : 622419 - 689796	anti-sense_lncRNA
MSTRG.27272.1	NW_004973249.1 : 737617 - 750855	anti-sense_lncRNA
MSTRG.27274.1	NW_004973249.1 : 797661 - 817895	anti-sense_lncRNA
MSTRG.27274.2	NW_004973249.1 : 797662 - 817929	anti-sense_lncRNA
MSTRG.27401.17	NW_004973250.1 : 1257405 - 1325680	anti-sense_lncRNA
MSTRG.27703.3	NW_004973251.1 : 1641002 - 1660722	anti-sense_lncRNA
MSTRG.27736.1	NW_004973252.1 : 97787 - 131188	anti-sense_lncRNA
MSTRG.27764.1	NW_004973252.1 : 287261 - 323795	anti-sense_lncRNA
MSTRG.27764.2	NW_004973252.1 : 287261 - 309664	anti-sense_lncRNA
MSTRG.27764.3	NW_004973252.1 : 287261 - 330803	anti-sense_lncRNA
MSTRG.27764.4	NW_004973252.1 : 287346 - 306710	anti-sense_lncRNA
MSTRG.27767.19	NW_004973252.1 : 547011 - 549124	anti-sense_lncRNA
MSTRG.2779.1	NW_004973182.1 : 3992234 - 3993423	anti-sense_lncRNA
MSTRG.27891.1	NW_004973252.1 : 981125 - 990867	anti-sense_lncRNA
MSTRG.2794.1	NW_004973182.1 : 4055980 - 4056406	anti-sense_lncRNA
MSTRG.27944.1	NW_004973252.1 : 1272007 - 1315534	anti-sense_lncRNA
MSTRG.27944.2	NW_004973252.1 : 1275806 - 1331913	anti-sense_lncRNA
MSTRG.27944.3	NW_004973252.1 : 1275939 - 1330478	anti-sense_lncRNA
MSTRG.27973.1	NW_004973252.1 : 1952661 - 1972535	anti-sense_lncRNA
MSTRG.27973.2	NW_004973252.1 : 1959448 - 1979788	anti-sense_lncRNA
MSTRG.28010.1	NW_004973252.1 : 2134384 - 2141596	anti-sense_lncRNA
MSTRG.2805.1	NW_004973182.1 : 4075173 - 4075671	anti-sense_lncRNA
MSTRG.28070.1	NW_004973252.1 : 2477645 - 2481887	anti-sense_lncRNA
MSTRG.28099.2	NW_004973252.1 : 2610229 - 2619091	anti-sense_lncRNA
MSTRG.2810.1	NW_004973182.1 : 4105672 - 4109371	anti-sense_lncRNA
MSTRG.28191.1	NW_004973252.1 : 3130646 - 3148078	anti-sense_lncRNA
MSTRG.28203.1	NW_004973252.1 : 3474467 - 3476216	anti-sense_lncRNA
MSTRG.28232.1	NW_004973252.1 : 3724573 - 4191329	anti-sense_lncRNA
MSTRG.28238.1	NW_004973252.1 : 3896773 - 3985006	anti-sense_lncRNA
MSTRG.2826.30	NW_004973182.1 : 4261891 - 4309243	anti-sense_lncRNA
MSTRG.28285.31	NW_004973252.1 : 4538159 - 4540260	anti-sense_lncRNA
MSTRG.28363.5	NW_004973252.1 : 5094875 - 5108391	anti-sense_lncRNA
MSTRG.28380.2	NW_004973252.1 : 5134967 - 5166336	anti-sense_lncRNA
MSTRG.28385.3	NW_004973252.1 : 5169954 - 5172120	anti-sense_lncRNA
MSTRG.28507.1	NW_004973252.1 : 6130482 - 6137175	anti-sense_lncRNA
MSTRG.28515.1	NW_004973252.1 : 6237527 - 6239254	anti-sense_lncRNA
MSTRG.28529.1	NW_004973252.1 : 6323465 - 6326236	anti-sense_lncRNA
MSTRG.28554.1	NW_004973252.1 : 6674212 - 6678928	anti-sense_lncRNA
MSTRG.28555.1	NW_004973252.1 : 6679427 - 6680808	anti-sense_lncRNA
MSTRG.28743.1	NW_004973253.1 : 477213 - 478044	anti-sense_lncRNA
MSTRG.2895.1	NW_004973182.1 : 4632532 - 4637446	anti-sense_lncRNA
MSTRG.29015.36	NW_004973253.1 : 2567491 - 2569858	anti-sense_lncRNA
MSTRG.29228.1	NW_004973253.1 : 3539305 - 3543585	anti-sense_lncRNA
MSTRG.29736.1	NW_004973253.1 : 6439851 - 6449352	anti-sense_lncRNA
MSTRG.29736.2	NW_004973253.1 : 6439885 - 6449352	anti-sense_lncRNA
MSTRG.29736.3	NW_004973253.1 : 6441028 - 6449344	anti-sense_lncRNA
MSTRG.29736.4	NW_004973253.1 : 6441788 - 6449344	anti-sense_lncRNA
MSTRG.29766.1	NW_004973253.1 : 6720444 - 6747263	anti-sense_lncRNA
MSTRG.2978.1	NW_004973182.1 : 5348866 - 5378842	anti-sense_lncRNA
MSTRG.29881.2	NW_004973253.1 : 7548390 - 7550227	anti-sense_lncRNA
MSTRG.29950.1	NW_004973253.1 : 7906076 - 7920839	anti-sense_lncRNA
MSTRG.30007.1	NW_004973253.1 : 8109182 - 8138401	anti-sense_lncRNA
MSTRG.30139.1	NW_004973253.1 : 10696155 - 10698241	anti-sense_lncRNA
MSTRG.30139.2	NW_004973253.1 : 10696156 - 10697221	anti-sense_lncRNA
MSTRG.30221.1	NW_004973253.1 : 12227092 - 12229681	anti-sense_lncRNA
MSTRG.30245.1	NW_004973253.1 : 12444977 - 12462714	anti-sense_lncRNA
MSTRG.30251.1	NW_004973253.1 : 12485624 - 12515421	anti-sense_lncRNA
MSTRG.30251.3	NW_004973253.1 : 12485631 - 12495546	anti-sense_lncRNA
MSTRG.30251.4	NW_004973253.1 : 12485634 - 12509332	anti-sense_lncRNA
MSTRG.30251.5	NW_004973253.1 : 12485634 - 12495546	anti-sense_lncRNA
MSTRG.30375.1	NW_004973253.1 : 13589344 - 13622978	anti-sense_lncRNA
MSTRG.30375.2	NW_004973253.1 : 13590848 - 13622985	anti-sense_lncRNA
MSTRG.30580.1	NW_004973253.1 : 15237789 - 15240459	anti-sense_lncRNA
MSTRG.30581.2	NW_004973253.1 : 15242441 - 15248411	anti-sense_lncRNA
MSTRG.30581.3	NW_004973253.1 : 15242466 - 15248812	anti-sense_lncRNA
MSTRG.30581.4	NW_004973253.1 : 15242498 - 15248411	anti-sense_lncRNA
MSTRG.30581.5	NW_004973253.1 : 15243091 - 15248407	anti-sense_lncRNA
MSTRG.306.1	NW_004973175.1 : 1129678 - 1158268	anti-sense_lncRNA
MSTRG.3062.1	NW_004973182.1 : 5772726 - 5773974	anti-sense_lncRNA
MSTRG.30639.1	NW_004973253.1 : 15911386 - 15915951	anti-sense_lncRNA
MSTRG.30639.2	NW_004973253.1 : 15912751 - 15916952	anti-sense_lncRNA
MSTRG.30968.1	NW_004973253.1 : 17348395 - 17494110	anti-sense_lncRNA
MSTRG.31021.1	NW_004973253.1 : 18005164 - 18007135	anti-sense_lncRNA
MSTRG.31047.1	NW_004973253.1 : 18842730 - 18865430	anti-sense_lncRNA
MSTRG.31059.1	NW_004973253.1 : 19060465 - 19083361	anti-sense_lncRNA
MSTRG.31066.1	NW_004973253.1 : 19083531 - 19092365	anti-sense_lncRNA
MSTRG.31066.2	NW_004973253.1 : 19083539 - 19085678	anti-sense_lncRNA
MSTRG.31066.3	NW_004973253.1 : 19084055 - 19085990	anti-sense_lncRNA
MSTRG.31277.1	NW_004973254.1 : 1683847 - 1710376	anti-sense_lncRNA
MSTRG.31323.1	NW_004973254.1 : 1938147 - 1966959	anti-sense_lncRNA
MSTRG.31386.1	NW_004973254.1 : 2401355 - 2425323	anti-sense_lncRNA
MSTRG.31574.1	NW_004973254.1 : 5259518 - 5267123	anti-sense_lncRNA
MSTRG.31610.1	NW_004973254.1 : 5530287 - 5533244	anti-sense_lncRNA
MSTRG.31654.25	NW_004973254.1 : 6018395 - 6023071	anti-sense_lncRNA
MSTRG.31727.1	NW_004973254.1 : 7140997 - 7145270	anti-sense_lncRNA
MSTRG.31736.1	NW_004973254.1 : 7309562 - 7321888	anti-sense_lncRNA
MSTRG.31739.2	NW_004973254.1 : 7350580 - 7357315	anti-sense_lncRNA
MSTRG.31833.1	NW_004973254.1 : 9831010 - 9847267	anti-sense_lncRNA
MSTRG.31833.2	NW_004973254.1 : 9831027 - 9844519	anti-sense_lncRNA
MSTRG.32006.1	NW_004973255.1 : 1238198 - 1248068	anti-sense_lncRNA
MSTRG.32006.2	NW_004973255.1 : 1238238 - 1248084	anti-sense_lncRNA
MSTRG.32090.1	NW_004973255.1 : 1704982 - 1753195	anti-sense_lncRNA
MSTRG.32109.1	NW_004973255.1 : 1917439 - 1923336	anti-sense_lncRNA
MSTRG.32110.1	NW_004973255.1 : 1921844 - 1960297	anti-sense_lncRNA
MSTRG.32162.1	NW_004973255.1 : 2298369 - 2300173	anti-sense_lncRNA
MSTRG.32292.1	NW_004973255.1 : 3074462 - 3095224	anti-sense_lncRNA
MSTRG.32303.1	NW_004973255.1 : 3183867 - 3197282	anti-sense_lncRNA
MSTRG.32309.1	NW_004973255.1 : 3204810 - 3208968	anti-sense_lncRNA
MSTRG.32315.1	NW_004973255.1 : 3237015 - 3240322	anti-sense_lncRNA
MSTRG.32317.1	NW_004973255.1 : 3248802 - 3249213	anti-sense_lncRNA
MSTRG.32319.1	NW_004973255.1 : 3253418 - 3254242	anti-sense_lncRNA
MSTRG.32336.2	NW_004973255.1 : 3401481 - 3402363	anti-sense_lncRNA
MSTRG.32349.1	NW_004973255.1 : 3439839 - 3441710	anti-sense_lncRNA
MSTRG.32359.2	NW_004973255.1 : 3514744 - 3523987	anti-sense_lncRNA
MSTRG.32364.1	NW_004973255.1 : 3572818 - 3573120	anti-sense_lncRNA
MSTRG.32367.1	NW_004973255.1 : 3579036 - 3583161	anti-sense_lncRNA
MSTRG.32371.1	NW_004973255.1 : 3594114 - 3594630	anti-sense_lncRNA
MSTRG.32375.1	NW_004973255.1 : 3655811 - 3656891	anti-sense_lncRNA
MSTRG.32398.1	NW_004973256.1 : 9080 - 11986	anti-sense_lncRNA
MSTRG.32504.9	NW_004973256.1 : 957804 - 961643	anti-sense_lncRNA
MSTRG.32606.1	NW_004973256.1 : 2793651 - 2801203	anti-sense_lncRNA
MSTRG.32871.1	NW_004973256.1 : 4375917 - 4388244	anti-sense_lncRNA
MSTRG.32956.1	NW_004973256.1 : 4977718 - 4981450	anti-sense_lncRNA
MSTRG.33341.1	NW_004973256.1 : 7719582 - 7753001	anti-sense_lncRNA
MSTRG.33341.2	NW_004973256.1 : 7720288 - 7720692	anti-sense_lncRNA
MSTRG.33650.1	NW_004973256.1 : 10772654 - 10828285	anti-sense_lncRNA
MSTRG.33650.3	NW_004973256.1 : 10823758 - 10865164	anti-sense_lncRNA
MSTRG.33651.1	NW_004973256.1 : 10803952 - 10808168	anti-sense_lncRNA
MSTRG.33659.1	NW_004973256.1 : 10847254 - 10857994	anti-sense_lncRNA
MSTRG.3369.1	NW_004973182.1 : 7574591 - 7586743	anti-sense_lncRNA
MSTRG.33690.39	NW_004973256.1 : 11100157 - 11102216	anti-sense_lncRNA
MSTRG.33690.41	NW_004973256.1 : 11108563 - 11112489	anti-sense_lncRNA
MSTRG.33720.4	NW_004973256.1 : 11310976 - 11311662	anti-sense_lncRNA
MSTRG.3378.1	NW_004973182.1 : 7605391 - 7608234	anti-sense_lncRNA
MSTRG.33827.3	NW_004973257.1 : 149325 - 152572	anti-sense_lncRNA
MSTRG.33827.4	NW_004973257.1 : 149678 - 152572	anti-sense_lncRNA
MSTRG.3390.1	NW_004973182.1 : 7676874 - 7677888	anti-sense_lncRNA
MSTRG.33924.1	NW_004973257.1 : 1401072 - 1414881	anti-sense_lncRNA
MSTRG.34415.1	NW_004973257.1 : 12380295 - 12428306	anti-sense_lncRNA
MSTRG.34453.1	NW_004973257.1 : 13328872 - 13335785	anti-sense_lncRNA
MSTRG.34458.1	NW_004973257.1 : 13364575 - 13393428	anti-sense_lncRNA
MSTRG.34496.1	NW_004973257.1 : 13994289 - 13996777	anti-sense_lncRNA
MSTRG.34523.1	NW_004973257.1 : 14447476 - 14498942	anti-sense_lncRNA
MSTRG.34523.5	NW_004973257.1 : 14464758 - 14498652	anti-sense_lncRNA
MSTRG.34523.7	NW_004973257.1 : 14467857 - 14497759	anti-sense_lncRNA
MSTRG.34542.1	NW_004973257.1 : 14832501 - 14870792	anti-sense_lncRNA
MSTRG.34550.1	NW_004973257.1 : 14871329 - 14884736	anti-sense_lncRNA
MSTRG.34556.1	NW_004973257.1 : 15031705 - 15033787	anti-sense_lncRNA
MSTRG.34557.1	NW_004973257.1 : 15034110 - 15034621	anti-sense_lncRNA
MSTRG.34563.15	NW_004973257.1 : 15155791 - 15194742	anti-sense_lncRNA
MSTRG.34563.27	NW_004973257.1 : 15163789 - 15187054	anti-sense_lncRNA
MSTRG.34563.32	NW_004973257.1 : 15163792 - 15194742	anti-sense_lncRNA
MSTRG.34563.33	NW_004973257.1 : 15163792 - 15228564	anti-sense_lncRNA
MSTRG.34563.35	NW_004973257.1 : 15163792 - 15228564	anti-sense_lncRNA
MSTRG.34758.1	NW_004973257.1 : 17895906 - 17904110	anti-sense_lncRNA
MSTRG.34763.1	NW_004973257.1 : 17915682 - 17983125	anti-sense_lncRNA
MSTRG.34763.3	NW_004973257.1 : 17952552 - 17983125	anti-sense_lncRNA
MSTRG.34763.4	NW_004973257.1 : 17961303 - 17969569	anti-sense_lncRNA
MSTRG.34887.1	NW_004973258.1 : 405857 - 411530	anti-sense_lncRNA
MSTRG.34887.2	NW_004973258.1 : 405861 - 411481	anti-sense_lncRNA
MSTRG.34887.3	NW_004973258.1 : 405873 - 411493	anti-sense_lncRNA
MSTRG.34887.4	NW_004973258.1 : 405875 - 411526	anti-sense_lncRNA
MSTRG.34937.2	NW_004973258.1 : 862909 - 868495	anti-sense_lncRNA
MSTRG.3498.1	NW_004973183.1 : 633759 - 645929	anti-sense_lncRNA
MSTRG.35059.1	NW_004973259.1 : 477813 - 478299	anti-sense_lncRNA
MSTRG.35068.1	NW_004973259.1 : 510940 - 514830	anti-sense_lncRNA
MSTRG.35120.1	NW_004973260.1 : 336914 - 337517	anti-sense_lncRNA
MSTRG.35121.1	NW_004973260.1 : 338992 - 388700	anti-sense_lncRNA
MSTRG.35121.2	NW_004973260.1 : 341918 - 349522	anti-sense_lncRNA
MSTRG.35296.1	NW_004973260.1 : 915306 - 923273	anti-sense_lncRNA
MSTRG.3530.6	NW_004973183.1 : 773801 - 782888	anti-sense_lncRNA
MSTRG.35318.1	NW_004973260.1 : 1112944 - 1126186	anti-sense_lncRNA
MSTRG.35382.1	NW_004973261.1 : 485011 - 498341	anti-sense_lncRNA
MSTRG.35388.1	NW_004973261.1 : 526419 - 528482	anti-sense_lncRNA
MSTRG.3540.2	NW_004973183.1 : 873681 - 878555	anti-sense_lncRNA
MSTRG.3540.3	NW_004973183.1 : 874454 - 878472	anti-sense_lncRNA
MSTRG.35432.1	NW_004973261.1 : 931158 - 957079	anti-sense_lncRNA
MSTRG.35438.1	NW_004973261.1 : 976951 - 1049881	anti-sense_lncRNA
MSTRG.35438.2	NW_004973261.1 : 980056 - 1049898	anti-sense_lncRNA
MSTRG.35505.11	NW_004973261.1 : 1603813 - 1607368	anti-sense_lncRNA
MSTRG.35505.12	NW_004973261.1 : 1604159 - 1607380	anti-sense_lncRNA
MSTRG.35505.13	NW_004973261.1 : 1604273 - 1607380	anti-sense_lncRNA
MSTRG.35518.1	NW_004973261.1 : 1629297 - 1630189	anti-sense_lncRNA
MSTRG.35524.1	NW_004973261.1 : 1660362 - 1661310	anti-sense_lncRNA
MSTRG.35580.3	NW_004973261.1 : 2099569 - 2099991	anti-sense_lncRNA
MSTRG.35599.1	NW_004973261.1 : 2158652 - 2161542	anti-sense_lncRNA
MSTRG.35599.2	NW_004973261.1 : 2158652 - 2161951	anti-sense_lncRNA
MSTRG.35639.1	NW_004973261.1 : 2407601 - 2410335	anti-sense_lncRNA
MSTRG.35639.2	NW_004973261.1 : 2407683 - 2410366	anti-sense_lncRNA
MSTRG.35639.3	NW_004973261.1 : 2407683 - 2408844	anti-sense_lncRNA
MSTRG.35643.2	NW_004973261.1 : 2437228 - 2437986	anti-sense_lncRNA
MSTRG.35672.1	NW_004973261.1 : 2640651 - 2641978	anti-sense_lncRNA
MSTRG.35675.1	NW_004973261.1 : 2659427 - 2661695	anti-sense_lncRNA
MSTRG.35675.2	NW_004973261.1 : 2659427 - 2661847	anti-sense_lncRNA
MSTRG.35741.1	NW_004973261.1 : 2951413 - 2968560	anti-sense_lncRNA
MSTRG.35754.1	NW_004973261.1 : 2995306 - 3010020	anti-sense_lncRNA
MSTRG.35789.1	NW_004973261.1 : 3112579 - 3113553	anti-sense_lncRNA
MSTRG.35929.2	NW_004973261.1 : 3919999 - 3942624	anti-sense_lncRNA
MSTRG.35971.4	NW_004973261.1 : 4159052 - 4161776	anti-sense_lncRNA
MSTRG.35971.5	NW_004973261.1 : 4159052 - 4161776	anti-sense_lncRNA
MSTRG.35976.2	NW_004973261.1 : 4178020 - 4187708	anti-sense_lncRNA
MSTRG.35995.1	NW_004973261.1 : 4247475 - 4248129	anti-sense_lncRNA
MSTRG.35996.1	NW_004973261.1 : 4251761 - 4257380	anti-sense_lncRNA
MSTRG.36008.1	NW_004973261.1 : 4314713 - 4315692	anti-sense_lncRNA
MSTRG.3604.1	NW_004973184.1 : 72200 - 93280	anti-sense_lncRNA
MSTRG.3605.1	NW_004973184.1 : 75600 - 121971	anti-sense_lncRNA
MSTRG.3605.3	NW_004973184.1 : 75632 - 101460	anti-sense_lncRNA
MSTRG.3608.1	NW_004973184.1 : 100741 - 121810	anti-sense_lncRNA
MSTRG.36212.4	NW_004973262.1 : 1010422 - 1012494	anti-sense_lncRNA
MSTRG.36429.1	NW_004973262.1 : 2702291 - 2726973	anti-sense_lncRNA
MSTRG.36505.1	NW_004973262.1 : 3534397 - 3550159	anti-sense_lncRNA
MSTRG.36570.4	NW_004973262.1 : 4127464 - 4130156	anti-sense_lncRNA
MSTRG.36771.1	NW_004973262.1 : 6634578 - 6636598	anti-sense_lncRNA
MSTRG.37049.1	NW_004973262.1 : 8458596 - 8460151	anti-sense_lncRNA
MSTRG.37219.1	NW_004973262.1 : 9192363 - 9195042	anti-sense_lncRNA
MSTRG.37277.2	NW_004973262.1 : 9762268 - 9783973	anti-sense_lncRNA
MSTRG.37502.1	NW_004973262.1 : 11544041 - 11562023	anti-sense_lncRNA
MSTRG.37643.2	NW_004973262.1 : 12589366 - 12590113	anti-sense_lncRNA
MSTRG.37862.1	NW_004973262.1 : 14779052 - 14789410	anti-sense_lncRNA
MSTRG.37922.2	NW_004973262.1 : 15907994 - 15911442	anti-sense_lncRNA
MSTRG.37925.1	NW_004973262.1 : 15918580 - 15926354	anti-sense_lncRNA
MSTRG.37925.2	NW_004973262.1 : 15920186 - 15924134	anti-sense_lncRNA
MSTRG.38013.2	NW_004973262.1 : 16213596 - 16216669	anti-sense_lncRNA
MSTRG.38339.1	NW_004973262.1 : 18026026 - 18029581	anti-sense_lncRNA
MSTRG.38339.2	NW_004973262.1 : 18026785 - 18028082	anti-sense_lncRNA
MSTRG.38365.1	NW_004973262.1 : 18081641 - 18082904	anti-sense_lncRNA
MSTRG.38415.1	NW_004973262.1 : 18386247 - 18409042	anti-sense_lncRNA
MSTRG.38415.2	NW_004973262.1 : 18401350 - 18409042	anti-sense_lncRNA
MSTRG.38415.3	NW_004973262.1 : 18401472 - 18409042	anti-sense_lncRNA
MSTRG.38438.1	NW_004973262.1 : 18459221 - 18463270	anti-sense_lncRNA
MSTRG.38679.3	NW_004973262.1 : 19952575 - 19984286	anti-sense_lncRNA
MSTRG.39068.3	NW_004973262.1 : 21548405 - 21563837	anti-sense_lncRNA
MSTRG.39082.2	NW_004973262.1 : 21652956 - 21658009	anti-sense_lncRNA
MSTRG.39085.1	NW_004973262.1 : 21667825 - 21668950	anti-sense_lncRNA
MSTRG.39106.1	NW_004973262.1 : 21765604 - 21792932	anti-sense_lncRNA
MSTRG.39400.1	NW_004973264.1 : 60915 - 65076	anti-sense_lncRNA
MSTRG.39405.42	NW_004973264.1 : 130637 - 133010	anti-sense_lncRNA
MSTRG.39405.44	NW_004973264.1 : 131173 - 133075	anti-sense_lncRNA
MSTRG.39431.1	NW_004973264.1 : 214468 - 215153	anti-sense_lncRNA
MSTRG.3985.3	NW_004973184.1 : 2100939 - 2199262	anti-sense_lncRNA
MSTRG.3985.4	NW_004973184.1 : 2104811 - 2229313	anti-sense_lncRNA
MSTRG.40078.1	NW_004973265.1 : 6033916 - 6036340	anti-sense_lncRNA
MSTRG.40182.1	NW_004973265.1 : 8080321 - 8092156	anti-sense_lncRNA
MSTRG.40182.2	NW_004973265.1 : 8080851 - 8081560	anti-sense_lncRNA
MSTRG.40211.1	NW_004973265.1 : 8345532 - 8357845	anti-sense_lncRNA
MSTRG.4023.1	NW_004973184.1 : 2391477 - 2394097	anti-sense_lncRNA
MSTRG.40355.1	NW_004973265.1 : 9419921 - 9440124	anti-sense_lncRNA
MSTRG.40438.1	NW_004973265.1 : 9717882 - 9738889	anti-sense_lncRNA
MSTRG.40597.1	NW_004973265.1 : 10680611 - 10685500	anti-sense_lncRNA
MSTRG.40715.2	NW_004973265.1 : 12348335 - 12350179	anti-sense_lncRNA
MSTRG.40748.2	NW_004973265.1 : 12620473 - 12622149	anti-sense_lncRNA
MSTRG.40763.1	NW_004973265.1 : 12721067 - 12722955	anti-sense_lncRNA
MSTRG.40786.1	NW_004973265.1 : 12907290 - 12908979	anti-sense_lncRNA
MSTRG.40889.1	NW_004973266.1 : 3395 - 34758	anti-sense_lncRNA
MSTRG.40889.12	NW_004973266.1 : 3859 - 34517	anti-sense_lncRNA
MSTRG.40889.7	NW_004973266.1 : 3564 - 34517	anti-sense_lncRNA
MSTRG.40889.9	NW_004973266.1 : 3830 - 34517	anti-sense_lncRNA
MSTRG.40891.2	NW_004973266.1 : 30565 - 39665	anti-sense_lncRNA
MSTRG.40891.3	NW_004973266.1 : 30565 - 42111	anti-sense_lncRNA
MSTRG.40947.1	NW_004973266.1 : 308084 - 342366	anti-sense_lncRNA
MSTRG.40951.1	NW_004973266.1 : 313871 - 331337	anti-sense_lncRNA
MSTRG.40996.1	NW_004973266.1 : 531309 - 546436	anti-sense_lncRNA
MSTRG.40996.2	NW_004973266.1 : 537634 - 541803	anti-sense_lncRNA
MSTRG.41142.2	NW_004973266.1 : 1140936 - 1143667	anti-sense_lncRNA
MSTRG.41143.1	NW_004973266.1 : 1164610 - 1253354	anti-sense_lncRNA
MSTRG.41815.1	NW_004973268.1 : 22413 - 27042	anti-sense_lncRNA
MSTRG.41937.1	NW_004973268.1 : 877928 - 879262	anti-sense_lncRNA
MSTRG.41962.1	NW_004973268.1 : 1045249 - 1109359	anti-sense_lncRNA
MSTRG.41962.12	NW_004973268.1 : 1058411 - 1109337	anti-sense_lncRNA
MSTRG.41962.14	NW_004973268.1 : 1058785 - 1110743	anti-sense_lncRNA
MSTRG.41962.15	NW_004973268.1 : 1058785 - 1110751	anti-sense_lncRNA
MSTRG.41962.18	NW_004973268.1 : 1058792 - 1110751	anti-sense_lncRNA
MSTRG.41962.19	NW_004973268.1 : 1058792 - 1110705	anti-sense_lncRNA
MSTRG.41962.23	NW_004973268.1 : 1085528 - 1110781	anti-sense_lncRNA
MSTRG.41962.25	NW_004973268.1 : 1085528 - 1110715	anti-sense_lncRNA
MSTRG.41962.27	NW_004973268.1 : 1085528 - 1110743	anti-sense_lncRNA
MSTRG.41962.28	NW_004973268.1 : 1085528 - 1110751	anti-sense_lncRNA
MSTRG.41962.3	NW_004973268.1 : 1045293 - 1112330	anti-sense_lncRNA
MSTRG.41962.30	NW_004973268.1 : 1085537 - 1110705	anti-sense_lncRNA
MSTRG.41962.32	NW_004973268.1 : 1088851 - 1110714	anti-sense_lncRNA
MSTRG.41962.33	NW_004973268.1 : 1092921 - 1110715	anti-sense_lncRNA
MSTRG.41962.8	NW_004973268.1 : 1056222 - 1111928	anti-sense_lncRNA
MSTRG.41966.1	NW_004973268.1 : 1135590 - 1140200	anti-sense_lncRNA
MSTRG.41972.1	NW_004973268.1 : 1183683 - 1211206	anti-sense_lncRNA
MSTRG.41977.2	NW_004973268.1 : 1217816 - 1240911	anti-sense_lncRNA
MSTRG.41979.1	NW_004973268.1 : 1231343 - 1237147	anti-sense_lncRNA
MSTRG.42222.1	NW_004973269.1 : 2366928 - 2369293	anti-sense_lncRNA
MSTRG.42276.1	NW_004973269.1 : 2484312 - 2537124	anti-sense_lncRNA
MSTRG.42438.1	NW_004973270.1 : 95534 - 121585	anti-sense_lncRNA
MSTRG.42441.1	NW_004973270.1 : 149284 - 151979	anti-sense_lncRNA
MSTRG.42446.1	NW_004973270.1 : 162200 - 165678	anti-sense_lncRNA
MSTRG.42448.1	NW_004973270.1 : 188496 - 193503	anti-sense_lncRNA
MSTRG.42478.1	NW_004973270.1 : 513800 - 545960	anti-sense_lncRNA
MSTRG.42494.2	NW_004973270.1 : 625408 - 626732	anti-sense_lncRNA
MSTRG.42494.3	NW_004973270.1 : 625628 - 626106	anti-sense_lncRNA
MSTRG.42498.5	NW_004973270.1 : 673210 - 678835	anti-sense_lncRNA
MSTRG.42507.1	NW_004973270.1 : 692300 - 695619	anti-sense_lncRNA
MSTRG.42536.1	NW_004973270.1 : 819988 - 843113	anti-sense_lncRNA
MSTRG.42545.1	NW_004973270.1 : 915603 - 919905	anti-sense_lncRNA
MSTRG.42547.2	NW_004973270.1 : 953140 - 953673	anti-sense_lncRNA
MSTRG.42561.1	NW_004973270.1 : 1016688 - 1025205	anti-sense_lncRNA
MSTRG.42564.1	NW_004973270.1 : 1064118 - 1070315	anti-sense_lncRNA
MSTRG.42564.2	NW_004973270.1 : 1064118 - 1101121	anti-sense_lncRNA
MSTRG.42564.3	NW_004973270.1 : 1064122 - 1101060	anti-sense_lncRNA
MSTRG.42564.4	NW_004973270.1 : 1064136 - 1069115	anti-sense_lncRNA
MSTRG.42598.1	NW_004973270.1 : 1215512 - 1221931	anti-sense_lncRNA
MSTRG.4261.1	NW_004973187.1 : 1 - 47882	anti-sense_lncRNA
MSTRG.4261.12	NW_004973187.1 : 31301 - 47661	anti-sense_lncRNA
MSTRG.4261.3	NW_004973187.1 : 4114 - 47949	anti-sense_lncRNA
MSTRG.4261.4	NW_004973187.1 : 4114 - 47660	anti-sense_lncRNA
MSTRG.4261.5	NW_004973187.1 : 5742 - 47684	anti-sense_lncRNA
MSTRG.42623.1	NW_004973270.1 : 1478447 - 1484442	anti-sense_lncRNA
MSTRG.42969.1	NW_004973276.1 : 84599 - 88925	anti-sense_lncRNA
MSTRG.42991.13	NW_004973276.1 : 228278 - 250091	anti-sense_lncRNA
MSTRG.42991.17	NW_004973276.1 : 228312 - 250027	anti-sense_lncRNA
MSTRG.42991.18	NW_004973276.1 : 228312 - 250027	anti-sense_lncRNA
MSTRG.42991.2	NW_004973276.1 : 225272 - 250053	anti-sense_lncRNA
MSTRG.42991.20	NW_004973276.1 : 242896 - 250028	anti-sense_lncRNA
MSTRG.42991.4	NW_004973276.1 : 225272 - 249512	anti-sense_lncRNA
MSTRG.42991.6	NW_004973276.1 : 228207 - 250028	anti-sense_lncRNA
MSTRG.43009.1	NW_004973276.1 : 295321 - 296984	anti-sense_lncRNA
MSTRG.43022.1	NW_004973276.1 : 334583 - 346841	anti-sense_lncRNA
MSTRG.43022.2	NW_004973276.1 : 335485 - 343456	anti-sense_lncRNA
MSTRG.4311.1	NW_004973187.1 : 174874 - 217070	anti-sense_lncRNA
MSTRG.4311.2	NW_004973187.1 : 176946 - 206994	anti-sense_lncRNA
MSTRG.43360.8	NW_004973277.1 : 1187598 - 1204699	anti-sense_lncRNA
MSTRG.43360.9	NW_004973277.1 : 1202192 - 1208656	anti-sense_lncRNA
MSTRG.43459.1	NW_004973277.1 : 1145661 - 1152506	anti-sense_lncRNA
MSTRG.43470.1	NW_004973277.1 : 1306511 - 1310098	anti-sense_lncRNA
MSTRG.43533.1	NW_004973277.1 : 2150438 - 2188022	anti-sense_lncRNA
MSTRG.43774.1	NW_004973278.1 : 2300026 - 2300899	anti-sense_lncRNA
MSTRG.43863.1	NW_004973279.1 : 182413 - 183048	anti-sense_lncRNA
MSTRG.43878.1	NW_004973279.1 : 246515 - 265894	anti-sense_lncRNA
MSTRG.44156.2	NW_004973279.1 : 1778388 - 1828443	anti-sense_lncRNA
MSTRG.44156.3	NW_004973279.1 : 1778395 - 1785242	anti-sense_lncRNA
MSTRG.44156.4	NW_004973279.1 : 1778402 - 1828443	anti-sense_lncRNA
MSTRG.44264.1	NW_004973279.1 : 2214940 - 2220840	anti-sense_lncRNA
MSTRG.44395.1	NW_004973280.1 : 14815 - 81824	anti-sense_lncRNA
MSTRG.44398.1	NW_004973280.1 : 35969 - 42184	anti-sense_lncRNA
MSTRG.44409.1	NW_004973280.1 : 124611 - 160644	anti-sense_lncRNA
MSTRG.44412.1	NW_004973280.1 : 170083 - 255815	anti-sense_lncRNA
MSTRG.44425.1	NW_004973280.1 : 345106 - 376766	anti-sense_lncRNA
MSTRG.44455.7	NW_004973280.1 : 668634 - 671300	anti-sense_lncRNA
MSTRG.44568.1	NW_004973280.1 : 1193425 - 1206604	anti-sense_lncRNA
MSTRG.44644.3	NW_004973281.1 : 63421 - 79586	anti-sense_lncRNA
MSTRG.44644.4	NW_004973281.1 : 65047 - 68879	anti-sense_lncRNA
MSTRG.44644.5	NW_004973281.1 : 77065 - 79841	anti-sense_lncRNA
MSTRG.44731.1	NW_004973281.1 : 528388 - 583605	anti-sense_lncRNA
MSTRG.44752.1	NW_004973281.1 : 622523 - 623765	anti-sense_lncRNA
MSTRG.44752.2	NW_004973281.1 : 622694 - 623164	anti-sense_lncRNA
MSTRG.44867.2	NW_004973281.1 : 1101089 - 1105745	anti-sense_lncRNA
MSTRG.44868.1	NW_004973281.1 : 1102345 - 1103719	anti-sense_lncRNA
MSTRG.45236.1	NW_004973284.1 : 737474 - 740818	anti-sense_lncRNA
MSTRG.45264.1	NW_004973284.1 : 781703 - 790103	anti-sense_lncRNA
MSTRG.45357.1	NW_004973285.1 : 131371 - 134274	anti-sense_lncRNA
MSTRG.45672.1	NW_004973285.1 : 1454080 - 1472891	anti-sense_lncRNA
MSTRG.45719.1	NW_004973285.1 : 1692988 - 1693264	anti-sense_lncRNA
MSTRG.45789.1	NW_004973285.1 : 2176104 - 2176499	anti-sense_lncRNA
MSTRG.4584.1	NW_004973187.1 : 2859340 - 2874722	anti-sense_lncRNA
MSTRG.4584.2	NW_004973187.1 : 2859362 - 2876499	anti-sense_lncRNA
MSTRG.4586.1	NW_004973187.1 : 2896766 - 2902633	anti-sense_lncRNA
MSTRG.4592.1	NW_004973187.1 : 2930287 - 2934334	anti-sense_lncRNA
MSTRG.45934.1	NW_004973285.1 : 3334350 - 3341249	anti-sense_lncRNA
MSTRG.45934.2	NW_004973285.1 : 3334350 - 3340827	anti-sense_lncRNA
MSTRG.45934.3	NW_004973285.1 : 3334370 - 3341190	anti-sense_lncRNA
MSTRG.46056.2	NW_004973285.1 : 4133864 - 4139359	anti-sense_lncRNA
MSTRG.46056.3	NW_004973285.1 : 4133864 - 4139359	anti-sense_lncRNA
MSTRG.46056.4	NW_004973285.1 : 4133864 - 4139359	anti-sense_lncRNA
MSTRG.46056.6	NW_004973285.1 : 4133889 - 4139338	anti-sense_lncRNA
MSTRG.46056.7	NW_004973285.1 : 4134052 - 4139135	anti-sense_lncRNA
MSTRG.46056.8	NW_004973285.1 : 4134176 - 4139351	anti-sense_lncRNA
MSTRG.46133.36	NW_004973285.1 : 4620634 - 4624489	anti-sense_lncRNA
MSTRG.46145.1	NW_004973285.1 : 4562141 - 4571274	anti-sense_lncRNA
MSTRG.46152.1	NW_004973285.1 : 4679030 - 4696375	anti-sense_lncRNA
MSTRG.46155.1	NW_004973285.1 : 4696506 - 4702266	anti-sense_lncRNA
MSTRG.46219.1	NW_004973285.1 : 5365341 - 5374433	anti-sense_lncRNA
MSTRG.46447.1	NW_004973287.1 : 135925 - 141156	anti-sense_lncRNA
MSTRG.46447.2	NW_004973287.1 : 135925 - 141098	anti-sense_lncRNA
MSTRG.46451.1	NW_004973287.1 : 165866 - 166330	anti-sense_lncRNA
MSTRG.46458.1	NW_004973287.1 : 210866 - 211372	anti-sense_lncRNA
MSTRG.46460.1	NW_004973287.1 : 275652 - 279312	anti-sense_lncRNA
MSTRG.46518.1	NW_004973287.1 : 718577 - 731360	anti-sense_lncRNA
MSTRG.46661.1	NW_004973287.1 : 1468043 - 1471246	anti-sense_lncRNA
MSTRG.46735.11	NW_004973287.1 : 1797770 - 1931894	anti-sense_lncRNA
MSTRG.46735.12	NW_004973287.1 : 1797844 - 1931862	anti-sense_lncRNA
MSTRG.46735.13	NW_004973287.1 : 1837684 - 1931894	anti-sense_lncRNA
MSTRG.46735.14	NW_004973287.1 : 1840600 - 1931878	anti-sense_lncRNA
MSTRG.46735.16	NW_004973287.1 : 1845290 - 1931878	anti-sense_lncRNA
MSTRG.46735.6	NW_004973287.1 : 1790006 - 1931879	anti-sense_lncRNA
MSTRG.46735.7	NW_004973287.1 : 1791551 - 1931879	anti-sense_lncRNA
MSTRG.46735.9	NW_004973287.1 : 1797131 - 1947857	anti-sense_lncRNA
MSTRG.46755.1	NW_004973287.1 : 1947930 - 1950014	anti-sense_lncRNA
MSTRG.46755.2	NW_004973287.1 : 1949555 - 1959835	anti-sense_lncRNA
[truncated: 27,811 more rows]
