# Supplementary material for: Transcriptome Analysis Revealed Potential Mechanisms of Resistance to Trichomoniasis gallinae Infection in Pigeon (Columba livia)
Source: Front Vet Sci. 2021 Sep 14;8:672270. doi: 10.3389/fvets.2021.672270 (PMC8477972; doi:10.3389/fvets.2021.672270)
Supplement: Supplementary Table 2 — Significantly differentially expressed (DE) lncRNAs and DE genes among control (N), susceptible (S), and tolerant (T) pigeons. DE-lncRNA (a) and DE genes (b) within N vs. S; DE-lncRNA (c) and DE genes (d) within N vs. T; DE-lncRNA (e) and DE genes (f) within S vs. T. [file Table_2.XLSX]

## Sheet: Supplementary Table S2a
Table S2a Significanly differential expressed lncRNAs between susceptible and tolerable birds
LncRNA transcript	S_FPKM	T_FPKM	Pvalue	log2FC	Direction
MSTRG.100123.1	0.07817	0.0349485	0.0298878	-0.954045	down
MSTRG.100451.2	0.282451	0.0721555	0.0480601	-1.32618	down
MSTRG.101427.1	0.200826	0.0939045	0.0033686	-0.980384	down
MSTRG.101447.14	0.130258	0.0284025	0.0175353	-1.54501	down
MSTRG.102015.1	0.276413	0.119822	0.0142667	-1.04423	down
MSTRG.102208.1	0.482312	0.0630935	0.00221976	-2.09084	down
MSTRG.102937.1	0.303147	0.057593	0.00575633	-1.77041	down
MSTRG.103505.1	0.546594	0.332958	5.09e-05	-0.671999	down
MSTRG.10373.4	0.159904	0.0771562	0.034302	-0.909813	down
MSTRG.10394.3	0.576896	0.216726	2.02e-07	-1.35082	down
MSTRG.104304.2	0.205917	0.0112102	0.00104031	-2.39023	down
MSTRG.105256.104	0.123125	0.00346825	0.0029857	-2.24661	down
MSTRG.105256.112	0.262367	0.030841	0.00661689	-1.95337	down
MSTRG.105845.1	0.472068	0.251401	0.000218569	-0.833719	down
MSTRG.105846.1	0.426013	0.204124	9.64e-05	-0.972358	down
MSTRG.105847.1	0.65405	0.383573	9.45e-05	-0.714521	down
MSTRG.107487.23	0.210201	0.0135143	0.00221616	-2.24892	down
MSTRG.108262.2	0.297844	0.0424278	0.00361822	-2.01392	down
MSTRG.109099.1	0.342153	0.199358	0.0307502	-0.672691	down
MSTRG.109624.51	0.205885	0.0759385	0.0138931	-1.23999	down
MSTRG.109646.1	0.283417	0.109197	0.046507	-1.0624	down
MSTRG.109648.1	0.320784	0.198427	0.0250891	-0.611402	down
MSTRG.109725.13	0.374733	0.0471135	0.0282681	-1.63331	down
MSTRG.109913.5	0.334863	0.0162335	0.0042099	-2.15861	down
MSTRG.110107.38	0.0957405	0.0388817	0.0379722	-1.06153	down
MSTRG.111019.6	0.217097	0.0287185	0.000195007	-2.23817	down
MSTRG.111162.1	0.511393	0.254056	4.23e-05	-0.952144	down
MSTRG.111392.23	0.161265	0.0503958	0.0399809	-1.2412	down
MSTRG.111826.26	0.260377	0.068026	0.0439663	-1.39929	down
MSTRG.111906.1	5.18877	2.70579	0.0169442	-0.818749	down
MSTRG.112209.32	0.081785	0.006761	0.0094214	-1.9237	down
MSTRG.112617.1	0.138087	0.0470825	0.0136892	-1.23143	down
MSTRG.113450.3	0.297924	0.017342	0.00796305	-2.0063	down
MSTRG.113450.4	0.310976	0.0327658	0.00015689	-2.34345	down
MSTRG.1143.1	0.173599	0.100993	0.0487006	-0.686744	down
MSTRG.114548.1	0.288661	0.099356	0.015052	-1.15932	down
MSTRG.114552.1	0.246738	0.143221	0.0443943	-0.73355	down
MSTRG.114665.17	0.349845	0.0633902	0.000958995	-1.93325	down
MSTRG.114701.4	0.249374	0.117896	0.0486001	-0.97321	down
MSTRG.114890.1	0.323574	0.17355	0.0492035	-0.735605	down
MSTRG.115520.46	0.116533	0.010192	0.017573	-1.78829	down
MSTRG.115569.3	0.151212	0.00929825	0.00486472	-2.11189	down
MSTRG.115675.16	0.179169	0.0255082	0.00246083	-1.97872	down
MSTRG.115889.1	0.200489	0.0951053	0.0104841	-0.966054	down
MSTRG.116106.1	0.186822	0.0747915	0.0141587	-1.1166	down
MSTRG.116138.2	0.123408	0.0177418	0.0272904	-1.64442	down
MSTRG.116146.1	0.245154	0.124784	0.0361175	-0.877769	down
MSTRG.116229.1	0.279736	0.0657413	0.00878658	-1.52937	down
MSTRG.116384.16	0.281298	0.0569542	0.0433163	-1.46571	down
MSTRG.116710.1	0.433048	0.225615	0.0482559	-0.817628	down
MSTRG.116821.1	0.626463	0.218696	2.12e-05	-1.42959	down
MSTRG.117359.1	0.132509	0.0378825	0.0353207	-1.31647	down
MSTRG.117398.3	0.0757348	0.0192177	0.011273	-1.48836	down
MSTRG.118708.15	0.185448	0.0176413	0.00194345	-2.17994	down
MSTRG.118760.1	0.288695	0.0945775	0.023355	-1.27556	down
MSTRG.120328.1	0.225027	0.0842512	0.0354396	-1.1057	down
MSTRG.120331.2	0.135277	0.00455125	1.26e-06	-3.13566	down
MSTRG.120332.1	0.2218	0.117683	0.0127994	-0.79395	down
MSTRG.120364.43	0.0672838	0.0125515	0.00214144	-1.82196	down
MSTRG.120364.64	0.223008	0.0629393	0.0116995	-1.43207	down
MSTRG.120536.8	0.405923	0.251751	0.0251762	-0.622103	down
MSTRG.120629.1	0.25883	0.0857285	0.0481972	-1.2707	down
MSTRG.121333.10	0.376155	0	2.04e-11	-4.86741	down
MSTRG.122051.14	0.460996	0.257218	0.0232848	-0.732949	down
MSTRG.122842.1	0.456449	0.278743	0.00429789	-0.664599	down
MSTRG.122844.1	0.655279	0.37952	0.0159001	-0.725865	down
MSTRG.123055.1	0.195764	0.0311525	0.0191988	-1.65741	down
MSTRG.123188.1	0.332591	0.187059	0.039391	-0.752592	down
MSTRG.12379.2	1.71989	0.302696	0.00161523	-1.99029	down
MSTRG.124224.1	0.257219	0.121002	0.04755	-0.901738	down
MSTRG.124504.3	0.111671	0.017694	0.0106113	-1.75826	down
MSTRG.124587.1	0.150232	0.0298598	0.0244373	-1.55928	down
MSTRG.124838.3	0.644027	0.312777	0.0366108	-0.945176	down
MSTRG.126027.1	0.406784	0.240297	0.0256756	-0.660286	down
MSTRG.126093.1	0.563097	0.289648	0.0476733	-0.86681	down
MSTRG.126215.33	0.694556	0.264132	0.0492917	-1.12088	down
MSTRG.126254.1	0.621166	0.389643	0.0449533	-0.605934	down
MSTRG.126318.70	0.256541	0.127453	0.00873381	-0.904131	down
MSTRG.126362.7	0.402595	0.133643	0.000328553	-1.45602	down
MSTRG.126528.1	0.124879	0.0424448	0.0020967	-1.31514	down
MSTRG.126571.14	0.511111	0	8.85e-31	-7.35344	down
MSTRG.1270.4	0.145536	0.0163985	0.04077	-1.54779	down
MSTRG.127090.1	0.149132	0.034473	0.0196386	-1.51262	down
MSTRG.128794.26	0.584419	0.293716	0.0358831	-0.92392	down
MSTRG.129766.1	0.310065	0.137711	0.00986562	-1.02158	down
MSTRG.130086.1	0.168155	0.0331787	0.0243674	-1.47156	down
MSTRG.130204.38	0.140805	0	7.52e-23	-6.05178	down
MSTRG.13106.10	0.232218	0.0968035	0.0354741	-1.07988	down
MSTRG.131250.2	0.137734	0.0488888	0.00500016	-1.34206	down
MSTRG.131295.1	0.529014	0.336496	0.0358456	-0.603266	down
MSTRG.132165.1	0.166932	0.0927522	0.0492369	-0.730372	down
MSTRG.132952.1	0.158154	0.072128	0.0357146	-0.982005	down
MSTRG.132989.25	0.137359	0.0636045	0.0364068	-0.982929	down
MSTRG.133006.2	0.296684	0.0200865	0.0106122	-1.92979	down
MSTRG.133880.4	0.164451	0.0152543	0.0481297	-1.48941	down
MSTRG.133942.1	0.54349	0.209759	0.0418628	-1.15564	down
MSTRG.133983.1	0.159768	0.068705	0.0165728	-1.01035	down
MSTRG.134103.2	0.740457	0.307732	0.0024061	-1.13042	down
MSTRG.135074.12	0.144472	0.0164235	0.0408118	-1.54736	down
MSTRG.135075.2	0.136885	0.0621017	0.0290107	-1.00822	down
MSTRG.135355.3	2.48953	0.0132272	0.0394686	-1.48366	down
MSTRG.135550.16	0.667097	0.382782	0.0171068	-0.721713	down
MSTRG.136018.25	0.393656	0.0231433	0.00639087	-2.04432	down
MSTRG.136365.1	0.219457	0.101607	0.0233323	-0.967088	down
MSTRG.137371.1	0.216772	0.114848	0.0165329	-0.792789	down
MSTRG.137499.2	0.301571	0.0890848	0.00791426	-1.40742	down
MSTRG.137523.1	0.326435	0.145676	0.0462358	-0.972271	down
MSTRG.137927.1	0.274164	0.133515	0.0456125	-0.89393	down
MSTRG.137961.1	0.223861	0.098255	0.0437259	-0.964494	down
MSTRG.138219.2	0.877808	0.004579	2.82e-10	-4.12207	down
MSTRG.138219.3	0.282198	0	1.16e-07	-3.74727	down
MSTRG.139942.29	0.153144	0.0272102	0.00234448	-1.83608	down
MSTRG.140930.2	0.172823	0	1.85e-11	-4.63524	down
MSTRG.141056.1	0.194382	0.0763285	0.00749031	-1.17525	down
MSTRG.141060.25	0.366146	0.212124	0.0352027	-0.702115	down
MSTRG.141103.1	0.443195	0.179854	0.0438691	-1.03392	down
MSTRG.141329.27	0.201845	0.0916953	0.0480989	-0.936882	down
MSTRG.142706.2	0.487202	0.219766	0.0142103	-0.988056	down
MSTRG.143251.2	0.240535	0.128436	0.000962958	-0.848446	down
MSTRG.143255.1	0.166214	0.0745765	0.0485924	-0.945101	down
MSTRG.143287.29	0.295452	0.022987	0.0123977	-1.88532	down
MSTRG.143341.49	0.420177	0.252225	0.0312646	-0.64473	down
MSTRG.143767.4	0.594934	0	1.38e-31	-7.39449	down
MSTRG.143873.17	0.110159	0.0242748	0.0328675	-1.50156	down
MSTRG.143889.2	0.119053	0.0229493	0.0100409	-1.6884	down
MSTRG.143974.21	0.254648	0.0527207	0.0129462	-1.63588	down
MSTRG.144121.1	0.381138	0.149588	0.00215392	-1.17241	down
MSTRG.144579.56	1.68178	0.137025	0.0156511	-1.82324	down
MSTRG.144821.1	0.147398	0.0555083	0.00925562	-1.19169	down
MSTRG.145443.1	0.160302	0.0439195	0.0171566	-1.43443	down
MSTRG.146439.23	0.217177	0.0725868	7.61e-05	-1.43288	down
MSTRG.146497.1	0.371356	0.218891	0.0304958	-0.664209	down
MSTRG.146809.1	0.227241	0.0850685	0.0177598	-1.15533	down
MSTRG.149082.7	0.5567	0.326137	0.020577	-0.701735	down
MSTRG.149862.3	0.164535	0.0212617	0.00627573	-1.95233	down
MSTRG.150064.2	0.189302	0.108345	0.0208813	-0.75363	down
MSTRG.150246.1	0.252387	0.112172	0.0122902	-1.03396	down
MSTRG.150251.1	0.155887	0.093195	0.0421516	-0.65998	down
MSTRG.150591.15	0.231818	0.0787993	0.00361357	-1.33228	down
MSTRG.150912.1	0.305939	0.0685468	0.0130355	-1.55419	down
MSTRG.151374.15	0.258862	0.0661305	0.00922271	-1.53711	down
MSTRG.151830.7	0.248976	0	9.71e-14	-4.85598	down
MSTRG.152015.2	0.225068	0.119453	0.00869909	-0.831906	down
MSTRG.152261.1	2.43617	1.46811	0.0495206	-0.699419	down
MSTRG.152262.21	0.606438	0.390784	0.00671309	-0.616396	down
MSTRG.152670.1	0.149322	0.0513885	0.0298702	-1.10452	down
MSTRG.152699.2	0.878077	0.24598	0.0203902	-1.41067	down
MSTRG.153229.4	0.0762435	0.010272	0.0236487	-1.65106	down
MSTRG.153344.2	0.16674	0.00830075	7.77e-05	-2.67491	down
MSTRG.153395.5	0.325886	0.0400638	0.00799147	-1.87079	down
MSTRG.153724.1	0.460103	0.020318	0.0165578	-1.81035	down
MSTRG.154526.3	0.219901	0.069923	0.0442677	-1.17623	down
MSTRG.15481.2	0.100778	0.0013655	0.000131277	-2.86551	down
MSTRG.155239.1	0.508781	0.195886	0.00199438	-1.23763	down
MSTRG.15572.1	0.367	0.177175	0.0496416	-0.857436	down
MSTRG.156087.1	0.233247	0.0349553	0.0212817	-1.66393	down
MSTRG.156089.11	0.656857	0.0911688	0.0234664	-1.67933	down
MSTRG.156437.9	0.357861	0.0271555	0.00319912	-2.17395	down
MSTRG.156558.1	0.343411	0.0795123	0.0180502	-1.49593	down
MSTRG.1590.22	0.227204	0.026781	0.0113556	-1.82323	down
MSTRG.15939.1	0.173888	0.0540885	0.0352955	-1.23454	down
MSTRG.160222.1	0.319434	0.166212	0.0223236	-0.854287	down
MSTRG.160675.19	0.159527	0	2.6e-14	-4.93668	down
MSTRG.160732.60	0.402446	0.143061	0.0199662	-1.24098	down
MSTRG.16592.1	0.623035	0.0871115	0.00165736	-2.02584	down
MSTRG.16710.42	0.12363	0.0305407	0.0123064	-1.47624	down
MSTRG.1681.1	0.310118	0.16245	0.0495931	-0.821079	down
MSTRG.16885.1	0.355292	0.209952	0.0263331	-0.673136	down
MSTRG.16998.7	0.144309	0.0579158	0.0368604	-1.11033	down
MSTRG.17454.1	0.372575	0.179629	0.011043	-0.936771	down
MSTRG.17539.17	0.230031	0.025725	0.0078809	-1.93888	down
MSTRG.17708.13	0.945317	0.356919	0.000477542	-1.3085	down
MSTRG.18785.2	0.82463	0.194021	0.0260527	-1.51998	down
MSTRG.18799.1	0.619253	0.394934	0.0152846	-0.606025	down
MSTRG.1918.42	0.767328	4.825e-05	2.78e-13	-5.12621	down
MSTRG.19571.1	0.468077	0.167618	0.00934043	-1.24882	down
MSTRG.2006.2	0.416262	0.239598	0.0101198	-0.714745	down
MSTRG.20225.1	0.243595	0.141394	0.0458208	-0.72351	down
MSTRG.2090.1	0.274512	0.156778	0.0331813	-0.73955	down
MSTRG.21489.2	0.266346	0.0581025	0.0010168	-1.65835	down
MSTRG.22806.1	0.213145	0.0908097	0.00867823	-1.13508	down
MSTRG.23423.41	0.2599	3.5e-06	4.9e-16	-5.40217	down
MSTRG.23423.44	0.136034	0.0523612	0.038181	-1.08286	down
MSTRG.23972.1	0.417974	0.237918	0.0344711	-0.724161	down
MSTRG.24025.1	0.19162	0.065218	0.005502	-1.33517	down
MSTRG.24407.20	0.386904	0.0365337	0.0414306	-1.53978	down
MSTRG.24407.81	0.921787	0.042886	7.76e-11	-3.63054	down
MSTRG.24426.2	0.304258	0.132287	0.0134344	-1.03955	down
MSTRG.24447.2	0.390711	0.208466	0.0276754	-0.793451	down
MSTRG.24810.2	0.25555	0.047469	0.00695921	-1.75599	down
MSTRG.24856.4	0.303953	0.144138	0.0325741	-0.998154	down
MSTRG.25458.1	0.370479	0.16169	0.0439418	-1.02333	down
MSTRG.26582.64	0.27446	0.00636175	0.037023	-1.53729	down
MSTRG.2663.23	1.38418	0.071312	6.34e-10	-3.43528	down
MSTRG.27215.99	0.25597	0.0853882	0.00863642	-1.36108	down
MSTRG.27508.1	0.148977	0.0546517	0.0037545	-1.2769	down
MSTRG.27973.1	0.224066	0.07969	0.0204059	-1.1483	down
MSTRG.28186.18	0.221129	0.032176	0.0115346	-1.78337	down
MSTRG.28237.54	0.497901	0.131919	0.00142704	-1.65422	down
MSTRG.30203.1	0.192054	0.053789	0.0310324	-1.35319	down
MSTRG.30581.5	0.35865	0.080124	0.0178937	-1.55672	down
MSTRG.31014.1	0.331288	0.149703	0.046334	-1.02878	down
MSTRG.31846.1	0.489744	0.298697	0.0114444	-0.640455	down
MSTRG.32397.6	0.049963	0.00792225	0.0429821	-1.49919	down
MSTRG.32518.8	0.419714	0.228259	0.0234129	-0.766818	down
MSTRG.32691.2	0.195132	0.0571627	0.0200197	-1.37342	down
MSTRG.3334.1	0.299203	0.190074	0.0195664	-0.597129	down
MSTRG.3343.1	0.360716	0.22339	0.0146315	-0.637736	down
MSTRG.3352.1	0.588019	0.0281307	0.0375953	-1.54566	down
MSTRG.33896.1	0.320398	0.079112	0.000871909	-1.5711	down
MSTRG.34377.1	0.223791	0.0351805	0.000250619	-2.07348	down
MSTRG.3484.1	0.473522	0.284614	0.0219449	-0.663351	down
MSTRG.35050.1	0.34319	0.183399	0.0344583	-0.798534	down
MSTRG.36571.1	0.259614	0.10942	0.0132389	-1.05283	down
MSTRG.36736.1	0.801396	0.322054	0.020452	-1.17896	down
MSTRG.39470.18	0.181165	0	8.89e-06	-3.32822	down
MSTRG.40710.1	0.284118	0.13547	0.032762	-0.900293	down
MSTRG.41065.1	0.208358	0.0963362	0.0337343	-0.92779	down
MSTRG.4137.1	0.150266	0.0560213	0.0108597	-1.18884	down
MSTRG.41717.10	0.23166	0.116559	0.0475747	-0.818656	down
MSTRG.41718.1	0.392883	0.240282	0.00846823	-0.68273	down
MSTRG.41962.1	0.315301	0.00673225	4.31e-05	-3.02528	down
MSTRG.4204.15	0.199072	0	9.86e-16	-5.44541	down
MSTRG.4204.16	0.111373	0.0113035	0.0165215	-1.8001	down
MSTRG.4220.1	0.268215	0.137218	0.023726	-0.863481	down
MSTRG.42594.1	0.313219	0.095983	0.00163711	-1.44809	down
MSTRG.42782.1	0.507604	0.168029	0.0063739	-1.25365	down
MSTRG.42991.6	0.14201	0.0200997	0.00162307	-2.02336	down
MSTRG.43024.9	2.38856	0.155559	0.0138088	-1.86229	down
MSTRG.4352.50	0.942142	0.530832	0.019156	-0.756711	down
MSTRG.44406.1	0.34711	0.183565	0.0402525	-0.772859	down
MSTRG.44711.23	0.160435	0.036412	0.0130179	-1.58332	down
MSTRG.44843.1	0.373362	0.0472578	0.0383151	-1.55916	down
MSTRG.45737.25	0.209974	0.0850232	0.00679536	-1.14835	down
MSTRG.46133.2	0.304919	0.037226	0.0395192	-1.55678	down
MSTRG.46310.9	0.180059	0.0156997	2.3e-05	-2.65008	down
MSTRG.46447.2	0.425353	0.12407	0.0381372	-1.29756	down
MSTRG.46739.1	0.175234	0.0911867	0.0147125	-0.851832	down
MSTRG.48356.12	0.304595	0.131118	0.0309615	-1.0441	down
MSTRG.48996.1	0.660984	0.3057	0.000674133	-1.04818	down
MSTRG.49138.1	0.17508	0.079254	0.0469493	-0.931822	down
MSTRG.49260.1	0.107298	0.0187877	0.0374515	-1.5333	down
MSTRG.49873.8	0.230252	0.00018325	1.21e-11	-4.86106	down
MSTRG.5020.17	0.269215	0.0597087	5.17e-05	-1.946	down
MSTRG.51462.60	0.439934	0.160051	0.0334051	-1.17101	down
MSTRG.51778.37	0.221882	0.0508062	0.0353732	-1.48589	down
MSTRG.51782.1	0.276235	0.128894	0.00985185	-1.01674	down
MSTRG.51782.2	0.139855	0.0134457	0.00813494	-1.91611	down
MSTRG.52038.1	0.247035	0.0836087	0.00879833	-1.2529	down
MSTRG.5205.2	0.301254	0.005346	3.94e-06	-3.35558	down
MSTRG.5208.1	0.835317	0.535259	2.05e-06	-0.614756	down
MSTRG.52134.2	0.266336	0.108762	0.0498644	-1.00706	down
MSTRG.5215.1	1.13067	0.616965	0.0451037	-0.830463	down
MSTRG.52158.1	0.236086	0.0202387	0.000617873	-2.39981	down
MSTRG.5216.19	0.146648	0.0631493	0.0267534	-1.08798	down
MSTRG.52334.1	0.296075	0.0978513	0.0218832	-1.26028	down
MSTRG.53108.1	0.183103	0.0409523	0.0404525	-1.45849	down
MSTRG.53880.12	0.210078	0.0386305	0.0452092	-1.46824	down
MSTRG.54358.1	0.141705	0.039153	0.0147691	-1.45752	down
MSTRG.55990.1	0.343684	0.211888	0.00513993	-0.650791	down
MSTRG.57715.3	0.252121	0.0280978	0.0247871	-1.68873	down
MSTRG.58375.4	0.156547	0.0425763	0.0277319	-1.37804	down
MSTRG.59463.1	0.296031	0.118616	0.0168452	-1.09029	down
MSTRG.59672.1	0.406896	0.207091	0.0183745	-0.868055	down
MSTRG.59868.2	0.24833	0.034721	0.0101318	-1.7561	down
MSTRG.61078.2	0.124987	0.0176392	0.0156201	-1.77208	down
MSTRG.61769.1	0.195762	0.0978487	0.00296632	-0.920459	down
MSTRG.62144.61	0.204706	0.0019365	1.83e-12	-4.30906	down
MSTRG.62575.1	0.330142	0.200375	0.0465576	-0.657185	down
MSTRG.62827.131	0.586534	0.0663135	0.0400697	-1.53733	down
MSTRG.63244.2	0.423185	0.0243942	0.0140086	-1.85911	down
MSTRG.635.1	0.110516	0.0417175	0.0330284	-1.12271	down
MSTRG.63964.2	0.592717	0.167225	0.0196154	-1.34899	down
MSTRG.64271.1	0.167241	0.060182	0.0432084	-1.13512	down
MSTRG.64839.2	0.366572	0.0284295	2.79e-12	-3.23418	down
MSTRG.65156.30	0.22308	0.0525328	0.0123671	-1.55587	down
MSTRG.65401.1	0.219734	0.11139	0.0272325	-0.854489	down
MSTRG.65404.1	0.148378	0.0741248	0.0144942	-0.886067	down
MSTRG.66909.17	0.685511	0.0561987	0.00193797	-2.24802	down
MSTRG.67122.7	0.250509	0.0787883	0.0398476	-1.22737	down
MSTRG.67370.7	0.378157	0.0176982	0.0132459	-1.87406	down
MSTRG.68052.60	0.273767	0.0742417	0.0114294	-1.49888	down
MSTRG.69646.1	0.369345	0.223229	0.0241006	-0.675663	down
MSTRG.71238.4	0.328719	0.088819	0.0401026	-1.39883	down
MSTRG.72197.1	0.513222	0.0218677	3.1e-09	-3.48237	down
MSTRG.73855.1	0.620972	0.240794	0.0069349	-1.17693	down
MSTRG.73904.2	0.341364	0.15982	0.0378573	-0.92461	down
MSTRG.73907.1	0.549851	0.160758	0.00826653	-1.42052	down
MSTRG.74009.2	0.217048	0.0753242	0.0181671	-1.19858	down
MSTRG.74016.3	0.229396	0.0950093	0.00473213	-1.12458	down
MSTRG.74674.23	0.357747	0.148053	0.000651111	-1.16877	down
MSTRG.7491.1	0.458256	0.240577	0.034148	-0.864164	down
MSTRG.75004.21	0.211717	0.0259435	0.0180098	-1.74885	down
MSTRG.75251.5	0.343023	0.105885	0.0273335	-1.35308	down
MSTRG.75386.30	0.172482	0.033859	0.0232022	-1.59464	down
MSTRG.7630.13	0.0795572	0.0369143	0.0173357	-0.932371	down
MSTRG.76509.1	0.410731	0.207877	0.00424527	-0.901914	down
MSTRG.76965.21	0.0708702	0.00914675	0.0305899	-1.62308	down
MSTRG.78221.1	0.122183	0.0560833	0.0239301	-0.955705	down
MSTRG.80192.1	0.257879	0.0835733	0.0433485	-1.2204	down
MSTRG.80736.1	0.182198	0.0789508	0.00632052	-1.06837	down
MSTRG.80955.2	0.239654	0.086933	0.017636	-1.16246	down
MSTRG.82676.1	0.367937	0.0878132	0.00161491	-1.70003	down
MSTRG.82779.1	0.309152	0.0507017	0.00314107	-1.87227	down
MSTRG.82779.63	0.323821	0.079153	0.0309609	-1.4784	down
MSTRG.82817.1	0.210816	0.0254697	0.00410298	-1.96341	down
MSTRG.82819.1	0.213675	0.101563	0.0219873	-0.904343	down
MSTRG.82960.1	0.277525	0.132014	0.0238235	-0.929353	down
MSTRG.83287.1	0.185502	0.0932188	0.0422723	-0.89994	down
MSTRG.83296.7	0.719581	0.0373978	4.21e-06	-3.11043	down
MSTRG.8426.32	0.0438127	0.0082515	0.0311365	-1.55466	down
MSTRG.86010.3	0.211874	0.0611485	0.00810445	-1.42821	down
MSTRG.86020.1	0.2003	0.0596535	0.0197174	-1.32196	down
MSTRG.86558.1	0.131568	0.0494703	0.0292077	-1.0758	down
MSTRG.86701.2	0.393923	0.004482	7.17e-06	-3.33052	down
MSTRG.86802.1	0.197354	0.0640505	0.00297429	-1.40237	down
MSTRG.88364.31	0.153698	4.1e-05	2.39e-12	-5.04802	down
MSTRG.88554.1	0.339194	0.133814	0.00865855	-1.17133	down
MSTRG.88894.4	0.266987	0.0878373	0.0339173	-1.30907	down
MSTRG.88959.2	0.071271	0.0138808	0.0297464	-1.55028	down
MSTRG.89107.1	0.274939	0.0524398	0.0248833	-1.554	down
MSTRG.89868.3	0.116643	0.052474	0.0292207	-0.981809	down
MSTRG.89989.30	0.158669	0.034921	0.0329834	-1.49885	down
MSTRG.89989.63	0.21242	0.0539868	0.0421134	-1.36657	down
MSTRG.90655.1	0.163152	0.0446187	0.0209152	-1.36591	down
MSTRG.92189.1	0.209959	0.0407585	0.0331396	-1.5211	down
MSTRG.92482.1	0.168524	0.0577225	0.00924545	-1.34883	down
MSTRG.92788.1	0.219281	0.107341	0.0493009	-0.863179	down
MSTRG.92806.1	0.266284	0.162057	0.0216638	-0.659356	down
MSTRG.93377.11	0.317072	0.0713215	0.0375568	-1.44693	down
MSTRG.93756.4	0.0986627	0.0053495	0.0114951	-1.91164	down
MSTRG.9400.9	0.260175	0.0754028	0.00565045	-1.47848	down
MSTRG.94558.3	0.069006	0.0157935	0.047737	-1.34836	down
MSTRG.94639.1	0.295298	0.130675	0.0139346	-1.04625	down
MSTRG.94842.11	0.238006	0.149772	0.0190389	-0.640812	down
MSTRG.94981.1	0.140493	0.081259	0.019902	-0.698764	down
MSTRG.95205.3	1.30507	0.299482	0.000996474	-1.8007	down
MSTRG.95899.1	0.136206	0.069546	0.048562	-0.859445	down
MSTRG.96061.37	0.524712	0	3.34e-06	-3.50095	down
MSTRG.96097.1	0.235501	0.137847	0.04932	-0.656153	down
MSTRG.9710.2	0.0815753	0.0123842	0.0227365	-1.66325	down
MSTRG.97387.1	0.221521	0.13966	0.027833	-0.618117	down
MSTRG.97551.1	0.188711	0.0734232	0.0194366	-1.10807	down
MSTRG.97932.36	0.145932	0.0729535	0.0296822	-0.892599	down
MSTRG.98034.1	0.293726	0.170248	0.043175	-0.690566	down
MSTRG.98128.18	0.319092	0.149784	0.00844487	-1.02284	down
MSTRG.98161.1	0.219315	0.065856	0.0349259	-1.22964	down
MSTRG.9898.2	0.428778	0.270881	0.00983	-0.590154	down
MSTRG.99763.1	0.465153	0.284162	0.0281025	-0.658966	down
MSTRG.100022.7	0	0.267331	2.2e-14	5.04675	up
MSTRG.100347.1	0.0601185	0.218945	0.0244775	1.43374	up
MSTRG.100767.2	0.033828	0.690037	0.02602	1.67254	up
MSTRG.101060.28	0.0960105	0.399798	0.0410972	1.42983	up
MSTRG.101075.7	0.418	1.56587	0.000132165	1.75765	up
MSTRG.101325.1	0.0681428	0.172573	0.0359924	1.11494	up
MSTRG.101325.3	0.0347535	0.139838	0.00931975	1.50842	up
MSTRG.101326.1	0.114789	0.400807	0.000196118	1.60333	up
MSTRG.101327.3	0.114106	0.278444	0.0420205	1.1108	up
MSTRG.101331.1	0.287671	0.562099	0.0391366	0.916464	up
MSTRG.101352.4	0.0265918	0.181709	0.0126887	1.79556	up
MSTRG.101378.25	0.0135722	0.133085	0.0302227	1.62934	up
MSTRG.101378.5	0.167397	0.31304	0.00807866	0.891469	up
MSTRG.101378.90	0.0840987	0.170815	0.00535511	0.969805	up
MSTRG.101382.1	0.107801	0.237397	0.0209833	1.04159	up
MSTRG.101534.2	0.0665785	0.267122	0.0477144	1.34327	up
MSTRG.101559.1	0.0701667	0.131589	0.0314245	0.838826	up
MSTRG.101688.1	0.210398	0.381055	0.0332073	0.815348	up
MSTRG.102132.3	0.057064	0.288191	0.0276636	1.52902	up
MSTRG.102452.1	0.106937	0.214763	0.0186066	0.948538	up
MSTRG.102472.2	0.00020875	0.191932	3.02e-14	4.74594	up
MSTRG.102980.3	0.0313735	0.203599	0.0264801	1.62324	up
MSTRG.103037.1	0.0698162	0.157307	0.0385567	1.0163	up
MSTRG.103505.2	0	0.201549	1.26e-23	6.27936	up
MSTRG.104045.1	0.0324115	0.137109	0.0161207	1.48637	up
MSTRG.104992.1	0.0362338	0.107997	0.0287187	1.25746	up
MSTRG.104996.1	0.0646812	0.149092	0.0251765	1.01583	up
MSTRG.105156.4	0.0317853	0.249447	0.0015506	2.13117	up
MSTRG.105161.1	0.0476235	0.139994	0.0382092	1.25895	up
MSTRG.105192.1	0.08953	0.285915	0.00793998	1.39035	up
MSTRG.105827.1	0.116579	0.191876	0.0474603	0.682914	up
MSTRG.105864.14	0.0918795	0.337974	0.0218042	1.43089	up
MSTRG.105864.39	0.121024	1.09819	0.0146263	1.79827	up
MSTRG.105872.2	0	0.272763	3.69e-15	5.2197	up
MSTRG.106506.1	0.0466005	0.153455	0.000633705	1.52491	up
MSTRG.108238.1	0.0774072	0.12698	0.0155931	0.674622	up
MSTRG.108247.1	0.127311	0.210068	0.0168228	0.700745	up
MSTRG.108679.1	0.487741	0.846806	0.0493589	0.737776	up
MSTRG.109084.1	0.0476347	0.100366	0.0453674	0.935695	up
MSTRG.109100.3	0.00803475	0.101344	0.0118848	1.89001	up
MSTRG.109143.1	0.0552638	0.29327	0.00184966	1.84837	up
MSTRG.109200.3	0.104941	0.243741	0.0196164	1.14669	up
MSTRG.10922.1	0.248784	0.422387	0.0350099	0.697394	up
MSTRG.109336.2	0.0184248	0.303306	0.0117265	1.90679	up
MSTRG.109909.35	0.165111	0.282595	0.00324509	0.779059	up
MSTRG.110539.3	0.108435	0.331103	0.00436376	1.41414	up
MSTRG.110705.1	0.262752	0.522695	0.0283039	0.910839	up
MSTRG.11096.2	0.0316548	0.184134	0.00800404	1.7938	up
MSTRG.111368.14	0.0538835	0.426783	0.0171597	1.74405	up
MSTRG.111458.13	0.0268075	0.150868	0.000101792	2.01829	up
MSTRG.111474.8	0.111948	0.312074	0.0410921	1.20853	up
MSTRG.111942.1	0.0533	0.114381	0.0143235	1.00694	up
MSTRG.113034.1	0.143072	0.287041	0.0177599	0.915666	up
MSTRG.113047.1	0.044455	0.138588	0.0311688	1.26524	up
MSTRG.113663.11	0.00375875	0.048674	0.00986818	1.94375	up
MSTRG.113754.1	0.0469408	0.255463	0.0418202	1.45545	up
MSTRG.115178.1	0.0806572	0.170323	0.00885837	0.97387	up
MSTRG.115551.2	0.0966163	0.331712	0.0438589	1.3006	up
MSTRG.115571.3	0.0222575	0.161825	0.0104052	1.83093	up
MSTRG.115682.4	0.024025	0.245823	0.0214819	1.72869	up
MSTRG.115720.2	0.0632505	0.194382	0.00169027	1.42889	up
MSTRG.115731.2	0.0616035	0.20509	0.00113678	1.47218	up
MSTRG.115732.1	0.105934	0.206758	0.0150331	0.879803	up
MSTRG.115790.1	0.0690132	0.151875	0.0422739	1.00852	up
MSTRG.116014.10	0.143765	0.224225	0.0472799	0.645804	up
MSTRG.116065.1	0.0939037	0.291207	0.00366628	1.37853	up
MSTRG.116703.1	0.211686	0.53261	0.0323552	1.10903	up
MSTRG.116821.2	0.0440217	0.436841	0.0461561	1.50731	up
MSTRG.117153.1	0.121664	0.215803	0.0325999	0.813113	up
MSTRG.117305.16	0.0481118	0.173689	0.0264	1.38402	up
MSTRG.117449.1	0.0193437	0.148654	0.0351218	1.5698	up
MSTRG.117740.10	0.040066	0.146443	0.0429977	1.36786	up
MSTRG.118269.1	0.284553	0.517971	0.01924	0.851892	up
MSTRG.118620.1	0.0291663	0.132252	0.00370209	1.68312	up
MSTRG.11998.13	0.149817	0.371277	0.035019	1.1132	up
MSTRG.120012.1	0.0901465	0.134476	0.0332387	0.606567	up
MSTRG.120127.1	0.052421	0.135107	0.0429221	1.10562	up
MSTRG.120154.1	0.0506705	0.137727	0.0471461	1.12148	up
MSTRG.12041.1	0.0612173	0.116906	0.0379423	0.856856	up
MSTRG.12077.2	0.033972	0.195382	0.0337802	1.52848	up
MSTRG.12085.1	0.135338	0.390858	0.010966	1.22455	up
MSTRG.122283.1	0.134775	0.277684	0.0190911	0.964572	up
MSTRG.123708.1	0.100821	0.200925	0.00606901	1.00634	up
MSTRG.12422.1	0.0451465	0.16867	0.0155891	1.39138	up
MSTRG.124688.9	0.0371682	0.14768	0.00897374	1.62024	up
MSTRG.12470.1	0.342255	0.601468	0.0133617	0.792436	up
MSTRG.125629.1	0.024099	0.168827	0.028626	1.61899	up
MSTRG.125629.5	0.004871	0.0478645	0.00166495	2.19784	up
MSTRG.125629.6	0.15071	0.279021	0.015369	0.891682	up
MSTRG.125769.34	0.126747	0.225886	0.0258331	0.82436	up
MSTRG.126222.6	0.0204973	0.106671	0.0442232	1.47545	up
MSTRG.126318.54	0.074955	0.282482	0.00106188	1.62069	up
MSTRG.126542.1	0.025601	0.118496	0.0325891	1.50432	up
MSTRG.126882.1	0.0918545	0.292173	0.0340483	1.25605	up
MSTRG.127024.2	0.0469272	0.158614	0.00104986	1.54652	up
MSTRG.127373.1	0.184602	0.529459	0.00405044	1.31221	up
MSTRG.129744.1	0.26125	0.402222	0.0474752	0.612847	up
MSTRG.130197.1	0.0069335	0.0328842	0.0342037	1.46496	up
MSTRG.130567.2	0.0161207	0.139338	0.00465971	2.01733	up
MSTRG.130780.32	0.260249	2.70855	0.00666726	1.99588	up
MSTRG.130874.1	0.0189032	0.196213	0.0412845	1.54411	up
MSTRG.130886.1	0.0286345	0.204881	0.00789015	1.88531	up
MSTRG.130943.53	0.0338972	0.0888758	0.0153036	1.21296	up
MSTRG.130978.1	0.0632562	0.175533	0.0211351	1.20527	up
MSTRG.130982.34	0.0966303	0.219807	0.0244074	1.06972	up
MSTRG.130997.1	0.172283	0.287886	0.0246283	0.727263	up
MSTRG.131732.1	0.089031	0.17842	0.041822	0.863341	up
MSTRG.131733.1	0.0337008	0.104088	0.0142241	1.30812	up
MSTRG.132785.22	0.0144008	0.128972	0.0063534	1.91649	up
MSTRG.133281.1	0.109997	0.194174	0.0149153	0.837382	up
MSTRG.133725.46	0.0585465	0.194931	0.0042461	1.46788	up
MSTRG.133755.1	0.786143	1.17715	0.00228284	0.599513	up
MSTRG.133953.15	0.0136708	0.128555	0.011944	1.83003	up
MSTRG.134438.1	0.0793685	0.212519	0.0366178	1.16623	up
MSTRG.13450.1	0.0430852	0.164052	0.00026881	1.59473	up
MSTRG.134822.1	0.0631103	0.15578	0.0283152	1.09047	up
MSTRG.135050.1	0.106308	0.253171	0.00305737	1.12654	up
MSTRG.135270.1	0.124152	0.196051	0.0362043	0.642645	up
MSTRG.135275.1	0.0641442	0.107568	0.0150439	0.720663	up
MSTRG.135333.1	3.83917	6.0752	0.0339491	0.646535	up
MSTRG.135397.27	0.0131045	0.195703	0.0104621	1.93602	up
MSTRG.135571.15	0.0613348	0.261657	0.00800615	1.66282	up
MSTRG.136177.1	0.0413593	0.257833	2.5e-05	2.16057	up
MSTRG.136261.1	0.0252313	2.69354	1.1e-14	4.56959	up
MSTRG.136808.1	0.0642873	0.406413	0.000377683	2.12499	up
MSTRG.136881.9	0.0611937	0.212097	0.0143563	1.41641	up
MSTRG.137995.1	0.228528	0.410414	0.0225276	0.851396	up
MSTRG.138016.14	0.17859	0.401255	0.01936	1.07074	up
MSTRG.138236.2	0.107455	0.445223	0.0206642	1.59053	up
MSTRG.138314.4	0.0253092	0.166776	0.0366415	1.5404	up
MSTRG.139402.25	0.311042	0.804586	0.000819823	1.29398	up
MSTRG.139896.9	0.0970603	0.246257	0.010009	1.19881	up
MSTRG.139907.1	0.0785692	0.21486	5.96e-05	1.37836	up
MSTRG.139909.1	0.19032	0.357106	0.00282229	0.915996	up
MSTRG.140096.1	0.166123	0.34637	0.0356281	0.97947	up
MSTRG.140169.2	0.0206997	0.235263	0.0215317	1.73372	up
MSTRG.141326.3	0.050177	0.267205	0.0252888	1.58007	up
MSTRG.141641.1	0.18304	0.361094	0.027243	0.898198	up
MSTRG.141713.1	0.0896845	0.252787	0.0177425	1.23892	up
MSTRG.142810.1	0.01077	0.169584	0.0328002	1.60927	up
MSTRG.142989.1	0.082262	0.187282	0.0164569	1.03742	up
MSTRG.143034.3	0.0408258	0.139293	0.0389247	1.33582	up
MSTRG.143749.62	0.026781	0.31325	0.00879303	1.96211	up
MSTRG.143767.2	0.0249435	0.296928	4.29e-06	2.81792	up
MSTRG.143792.7	0.0155515	0.154278	0.0278628	1.66046	up
MSTRG.144614.37	0.0862373	0.466145	0.0257768	1.59451	up
MSTRG.146439.8	0.0217528	0.18941	0.00129296	2.09052	up
MSTRG.146473.1	0.0327415	0.127245	0.00480468	1.56394	up
MSTRG.147176.5	0.103615	0.337306	0.00255226	1.53932	up
MSTRG.148077.1	0.0295755	0.110635	0.0102421	1.50727	up
MSTRG.148169.2	0	0.205095	3.03e-11	4.70273	up
MSTRG.148529.1	0.030625	0.168366	0.0171739	1.64968	up
MSTRG.149338.4	0.069826	0.24686	0.0424521	1.31927	up
MSTRG.149638.1	0.0607945	0.21284	0.0470346	1.30698	up
MSTRG.149862.1	0.0640287	0.154679	0.0363221	1.10514	up
MSTRG.150879.1	0.094373	0.310347	0.000896684	1.48331	up
MSTRG.151461.1	0.066523	0.286118	0.00320191	1.71295	up
MSTRG.151859.1	0.0678157	0.153384	0.0125862	1.07334	up
MSTRG.152143.1	0.0391925	0.187558	0.000220406	1.80903	up
MSTRG.152341.1	0.063647	0.200727	0.0237591	1.34412	up
MSTRG.15239.1	0.0476005	0.096073	0.0377747	0.882789	up
MSTRG.153095.12	0.0163625	0.0939355	0.0266085	1.62489	up
MSTRG.153518.1	0.110632	2.13815	1.15e-05	2.94736	up
MSTRG.153518.2	0.118765	0.862452	0.00207102	2.06315	up
MSTRG.153522.2	0.0232098	0.226459	0.0455758	1.51252	up
MSTRG.153691.1	0.190717	0.381607	0.0476537	0.872678	up
MSTRG.153815.1	0.727317	1.10941	0.0212031	0.617496	up
MSTRG.153889.11	0.67068	5.10316	0.0341366	1.58937	up
MSTRG.154402.2	0.0311975	0.134421	0.0331182	1.43086	up
MSTRG.154526.1	0.112641	0.224879	0.033483	0.885856	up
MSTRG.154639.1	0.0655918	0.203738	0.0381574	1.21358	up
MSTRG.155016.1	0.149665	0.386586	0.0170854	1.15325	up
MSTRG.155397.4	0	83.9054	1.64e-67	9.8253	up
MSTRG.15541.42	0.0128252	0.227554	0.0308722	1.62477	up
MSTRG.156449.3	0.0200248	0.162867	0.0476467	1.49815	up
MSTRG.156823.1	0.00635475	0.197036	3.84e-08	3.34928	up
MSTRG.156832.1	0.356608	0.693977	0.0431406	0.871924	up
MSTRG.15843.1	0.573341	2.6395	0.0465723	1.39718	up
MSTRG.16470.1	0.0222922	0.100534	0.00247176	1.70686	up
MSTRG.16544.2	0.00469725	0.117368	0.0176165	1.7837	up
MSTRG.18141.1	0.174547	0.28086	0.00506047	0.682455	up
MSTRG.18269.3	0.0195062	0.154231	0.00143526	2.08637	up
MSTRG.18361.1	0.091405	0.336296	0.000999544	1.62295	up
MSTRG.19556.1	0.0530648	0.127754	0.00567273	1.10529	up
MSTRG.19672.23	0.265507	0.419917	0.00915825	0.644295	up
MSTRG.21194.1	0.0576827	0.351063	0.000843551	2.00164	up
MSTRG.22767.17	0.023689	0.472893	0.00084132	2.47675	up
MSTRG.24262.19	0.0388025	0.330604	0.0339885	1.59671	up
MSTRG.24262.23	0.01623	0.148834	0.0196981	1.73293	up
MSTRG.24306.1	0.042796	0.205868	0.00745027	1.67137	up
MSTRG.24407.76	0.462923	1.10661	0.00163381	1.16499	up
MSTRG.24502.37	0.02094	0.246735	0.0342244	1.60108	up
MSTRG.24541.1	0.176525	0.2638	0.0367974	0.589151	up
MSTRG.2462.2	0.0263593	0.121499	0.0292219	1.51078	up
MSTRG.24667.1	0.100662	0.188999	0.0489471	0.817385	up
MSTRG.25617.10	0.058141	0.186595	0.0244213	1.31175	up
MSTRG.26107.1	0.113625	0.253767	0.0385977	0.957525	up
MSTRG.26582.63	0.0395143	0.290094	0.0279834	1.63768	up
MSTRG.26710.1	0.318233	0.555049	0.0287265	0.748392	up
MSTRG.26782.30	0.0254072	0.121784	0.0216459	1.55572	up
MSTRG.2693.1	0.056215	0.208689	0.0230833	1.3824	up
MSTRG.27215.129	0.215541	0.377724	0.0336527	0.744301	up
MSTRG.27240.1	0.0697357	0.192101	0.0123144	1.21641	up
MSTRG.27764.2	0.0429957	0.226949	0.0238326	1.59507	up
MSTRG.27944.4	0.0704225	0.20859	0.0177833	1.27626	up
MSTRG.29736.1	0.025152	0.204051	0.0254066	1.66763	up
MSTRG.30045.1	0.029805	0.0908468	0.0454729	1.16674	up
MSTRG.30231.1	0.0351158	0.357156	0.025088	1.6877	up
MSTRG.30231.3	0.0832583	0.296063	0.0149313	1.45341	up
MSTRG.31066.1	0.183178	0.394485	0.00199657	1.05826	up
MSTRG.32158.40	0.263282	0.593915	0.0325706	1.06085	up
MSTRG.32309.1	0.07641	0.166998	0.00517453	1.04237	up
MSTRG.32315.1	0.070121	0.149799	0.035062	0.944512	up
MSTRG.32493.1	0.395406	0.658207	0.0399629	0.691103	up
MSTRG.32507.1	0.0447587	0.18576	0.0408344	1.39525	up
MSTRG.33097.1	0.0415872	0.13776	0.000865187	1.47855	up
MSTRG.3331.3	0	0.187116	5.1e-19	5.71937	up
MSTRG.3338.5	0.007405	0.117477	7.79e-05	2.70667	up
MSTRG.3352.4	0.051353	0.295741	0.00253444	1.88998	up
MSTRG.33743.12	0.184156	0.310591	0.00843127	0.743407	up
MSTRG.34539.1	0.0558915	0.152245	0.0149357	1.23666	up
MSTRG.34555.20	0.0101592	0.091764	0.000809947	2.13086	up
MSTRG.3479.1	0.0537103	0.145411	0.00207095	1.29211	up
MSTRG.34982.57	0.100823	0.321165	0.0028978	1.44733	up
MSTRG.35438.2	0.0605622	0.167208	0.0042983	1.2483	up
MSTRG.35640.6	0.45812	0.718045	0.00348052	0.666792	up
MSTRG.38415.6	0.016489	0.34803	0.000382939	2.60913	up
MSTRG.39495.41	0.003035	0.068237	0.0252389	1.68052	up
MSTRG.39862.1	0.429702	0.72421	0.0472078	0.716108	up
MSTRG.39932.1	0.0757798	0.164154	0.0406773	0.96199	up
MSTRG.3999.3	0.0498105	0.155041	0.00223737	1.44461	up
MSTRG.40168.1	0.0596477	0.159714	0.0225616	1.14139	up
MSTRG.41962.20	0.00163925	0.235253	0.0141734	1.81884	up
MSTRG.41962.33	0.048341	0.117916	0.0383353	1.12339	up
MSTRG.42038.28	0.0267103	0.154048	0.00744952	1.78963	up
MSTRG.42223.1	0.0627702	0.162033	1.04e-05	1.31451	up
MSTRG.42325.1	0.210935	0.444917	0.00862966	1.07558	up
MSTRG.42680.1	0.0465838	0.134816	0.02955	1.20929	up
MSTRG.42699.9	0.0307115	0.379688	0.000580608	2.35408	up
MSTRG.42918.1	0.040072	0.784305	2.05e-18	3.8842	up
MSTRG.43360.1	0.155991	10.7764	0.0137784	1.83737	up
MSTRG.43415.77	0.0453283	0.242334	0.000262964	2.05461	up
MSTRG.43415.82	0.321197	0.528459	0.0136089	0.70744	up
MSTRG.43516.26	0.229951	0.352421	0.0360142	0.591515	up
MSTRG.43516.28	0.170617	0.293976	0.0159918	0.741411	up
MSTRG.43516.32	0.0553047	0.44775	0.0343033	1.59553	up
MSTRG.44125.69	0.0442278	0.212657	0.0221962	1.57113	up
MSTRG.44182.4	0.026476	0.422931	0.000327282	2.51915	up
MSTRG.44182.9	0.11065	0.555522	0.000286975	1.94551	up
MSTRG.44328.33	0.0580398	0.203512	0.0491009	1.31329	up
MSTRG.44644.4	0.0935057	0.230072	0.0301857	1.0937	up
MSTRG.44753.27	0.0382455	0.117105	0.00924085	1.35905	up
MSTRG.44758.1	0.0201673	0.10443	0.000581981	1.89096	up
MSTRG.44877.5	0.00548275	0.0771122	0.0441196	1.51687	up
MSTRG.45024.16	0.0517647	0.166986	0.0195209	1.34965	up
MSTRG.4508.1	0.0255177	0.226994	0.00914486	1.89582	up
MSTRG.4513.1	0.0373998	0.248739	0.0402665	1.53264	up
MSTRG.45745.1	0.188127	0.308	0.00295213	0.721429	up
MSTRG.45762.9	0.138306	0.316134	0.0412786	1.02372	up
MSTRG.46667.1	0.202514	0.384068	0.0171298	0.905828	up
MSTRG.46697.1	0.213782	0.402521	0.00930503	0.880402	up
MSTRG.47052.3	0.0832155	0.214001	0.00836807	1.22889	up
MSTRG.4890.1	0.0956695	0.213242	0.00346859	1.07202	up
MSTRG.4895.4	0.250572	0.410699	0.0359324	0.710744	up
MSTRG.4901.1	0.176947	0.633242	0.0297587	1.36615	up
MSTRG.4902.2	0.110069	0.289595	0.0294332	1.17778	up
MSTRG.49260.2	0.01494	0.135235	0.00318178	2.09241	up
MSTRG.49630.1	0.127752	0.275904	0.012884	1.02616	up
MSTRG.49731.19	0.0102125	0.181012	0.000276913	2.614	up
MSTRG.50478.1	0.0745668	0.151254	0.019166	0.95599	up
MSTRG.51082.1	0.0717705	0.133319	0.00562604	0.85972	up
MSTRG.51365.1	0.0294862	0.18779	0.01606	1.68293	up
MSTRG.51694.19	0.070071	0.185199	0.0147995	1.18962	up
MSTRG.51955.1	0.06053	0.186846	0.0070942	1.35694	up
MSTRG.5209.2	2.5e-07	1.16435	6.67e-26	6.99949	up
MSTRG.5209.9	0.00832325	0.145998	0.00345913	2.18964	up
MSTRG.5221.1	0.0947637	0.225561	0.0105801	1.1379	up
MSTRG.52748.23	0.230248	0.413385	0.0163416	0.794249	up
MSTRG.52782.1	0.0514408	0.481242	0.00168108	2.17381	up
MSTRG.53140.79	3.3e-05	0.22426	5.92e-21	6.01472	up
MSTRG.53410.1	0.159311	0.334629	0.0370309	0.918428	up
MSTRG.53568.2	0.0550863	0.184568	0.0315228	1.32908	up
MSTRG.53869.1	0.059162	0.253966	0.0396923	1.44403	up
MSTRG.53880.5	0.0013555	0.156771	9.43e-17	4.87997	up
MSTRG.54768.1	0.103082	0.224996	0.0483524	0.985633	up
MSTRG.54859.11	0	0.140916	3.3e-10	4.4519	up
MSTRG.5507.1	0.0267465	0.0791745	0.0457789	1.22186	up
MSTRG.55341.11	0.140719	0.301852	0.0344378	0.989431	up
MSTRG.55351.1	0.0563447	0.193111	0.0417856	1.23938	up
MSTRG.55441.11	0.153498	0.325556	0.0460574	0.933004	up
MSTRG.55487.1	0.0798125	0.285619	0.000854367	1.52192	up
MSTRG.56208.1	0.057178	0.12542	0.0340602	1.00068	up
MSTRG.56688.1	0.429494	0.644577	0.01087	0.608235	up
MSTRG.56851.8	0.0513745	0.318012	0.0229929	1.68063	up
MSTRG.57017.1	0.05603	0.164392	0.00720639	1.33874	up
MSTRG.57880.1	0.0764253	0.225308	0.0120554	1.3274	up
MSTRG.57898.6	0.115247	0.219318	0.0310793	0.867024	up
MSTRG.58102.1	0.153404	0.351851	0.00187319	1.1282	up
MSTRG.58521.7	0.0306925	0.180616	0.016856	1.70264	up
MSTRG.58524.21	0.112828	0.444963	0.0110999	1.55534	up
MSTRG.58951.1	0.0209355	0.139759	0.00849261	1.81074	up
MSTRG.59448.27	0.0714925	0.33974	0.00636227	1.71572	up
MSTRG.60323.1	0.254754	0.998568	0.0247658	1.47209	up
MSTRG.60345.1	0.034385	0.172181	0.00182256	1.78324	up
MSTRG.60969.1	0.149506	0.312486	0.00815709	1.00066	up
MSTRG.61406.23	0.130536	0.413482	0.00617024	1.43306	up
MSTRG.61419.4	0.0280528	1.4091	0.000253118	2.7541	up
MSTRG.61494.1	0.058127	0.131583	0.0211738	1.02794	up
MSTRG.61636.1	0.0967105	0.215315	0.0434962	1.00007	up
MSTRG.62078.1	0.130212	0.554954	0.0183107	1.53447	up
MSTRG.62144.32	0.00766825	0.106285	0.00789898	1.98013	up
MSTRG.62412.1	0.0458765	0.111414	0.0208883	1.15224	up
MSTRG.62759.1	0.0433357	0.0770165	0.0484633	0.763805	up
MSTRG.63004.1	0.0619375	0.170589	0.000428802	1.35529	up
MSTRG.63046.27	0.078966	0.215934	0.00313818	1.30367	up
MSTRG.6318.1	0.0753955	0.211299	0.0152025	1.28581	up
MSTRG.6318.3	0.00929025	0.078133	0.0313591	1.61974	up
MSTRG.63322.1	0.104507	0.204888	0.0051737	0.938644	up
MSTRG.6345.15	0.00100075	0.159885	9.13e-13	4.6108	up
MSTRG.63458.1	0.263711	0.403205	0.010287	0.607298	up
MSTRG.63745.1	0.110231	0.259967	0.0087368	1.13185	up
MSTRG.63751.6	0.18825	0.369146	0.0486792	0.900665	up
MSTRG.63752.1	0.252401	0.39896	0.0490856	0.650038	up
MSTRG.63964.1	0.0248993	0.311958	0.000209395	2.50948	up
MSTRG.64218.21	0.0307963	0.109953	0.00097398	1.65858	up
MSTRG.64314.1	0.124409	0.289228	0.0367208	1.035	up
MSTRG.64318.1	0.120101	0.300809	0.0119264	1.1657	up
MSTRG.64322.1	0.0234655	0.211029	0.000486758	2.22846	up
MSTRG.64327.1	0.0671807	0.160541	0.0310463	1.08668	up
MSTRG.64342.1	0.0670355	0.175891	0.0434805	1.13101	up
MSTRG.64346.2	0.0104603	0.078601	0.0268231	1.63976	up
MSTRG.64513.1	0.197398	0.365546	0.0424292	0.82344	up
MSTRG.64958.6	0.436204	1.64989	0.0291485	1.42996	up
MSTRG.65096.1	0.199133	0.349086	0.0141914	0.816188	up
MSTRG.65202.5	0	0.247056	9.51e-13	4.83545	up
MSTRG.65340.39	0.099235	0.222079	0.0411206	0.982825	up
MSTRG.65455.1	0.0801488	0.161004	0.0225091	0.915294	up
MSTRG.65610.10	0.00863675	0.190609	0.000799202	2.4827	up
MSTRG.65869.2	0.0280232	0.140819	0.00772576	1.7877	up
MSTRG.66139.1	0.0561675	0.123784	0.0202867	1.02208	up
MSTRG.6700.5	0.0685898	0.227871	0.00803439	1.48808	up
MSTRG.67093.1	0.172891	0.447395	0.0285543	1.10906	up
MSTRG.67105.29	0.124281	0.340012	0.0394109	1.23077	up
MSTRG.67124.1	0.385623	0.614084	0.00380422	0.660912	up
MSTRG.67180.2	0.0007925	0.208812	9.81e-15	4.91643	up
MSTRG.67759.6	0.0421557	0.119361	0.00960567	1.32099	up
MSTRG.693.1	0.062265	0.179508	0.0127367	1.26367	up
MSTRG.7035.1	0.0733957	0.137367	0.00332459	0.88847	up
MSTRG.70704.1	0.121735	0.343834	0.0367544	1.19255	up
MSTRG.70707.1	0.0873975	0.220194	0.00741333	1.17608	up
MSTRG.71597.2	0.10186	0.399288	0.00645238	1.60297	up
MSTRG.72007.22	0	0.291992	1.8e-26	6.59304	up
MSTRG.72671.1	0.30498	0.566936	0.0392893	0.85688	up
MSTRG.72835.1	0.187412	0.339237	0.000855688	0.852877	up
MSTRG.73322.1	0.0921248	0.192477	0.0473878	0.950816	up
MSTRG.73888.38	0.042984	0.129944	0.0230916	1.31556	up
MSTRG.74069.1	0.0326265	0.369148	0.0228678	1.71917	up
MSTRG.74654.3	0.0674327	0.157785	0.0304641	1.05985	up
MSTRG.74749.1	0.203049	0.34162	0.00254453	0.732259	up
MSTRG.75075.1	0.0708348	0.193761	0.042119	1.17689	up
MSTRG.75297.52	0.0244658	0.204778	0.00140341	2.15067	up
MSTRG.75405.3	0.0981672	0.200572	0.0325464	0.94303	up
MSTRG.76814.4	0.15788	0.249656	0.0174876	0.639292	up
MSTRG.76841.9	0.0318405	0.231192	0.00554709	1.90896	up
MSTRG.76860.7	0.0153577	0.172659	0.00476252	2.07848	up
MSTRG.77262.1	0.0485823	0.19441	0.03881	1.35481	up
MSTRG.77857.1	0.043443	0.177946	0.0394096	1.39011	up
MSTRG.79999.2	0.0914043	0.213268	0.0217579	1.07285	up
MSTRG.80158.1	0.0107277	0.143613	0.0125675	1.87171	up
MSTRG.80268.1	0.0329573	0.157886	0.0048971	1.71047	up
MSTRG.80501.29	0.00925625	0.273454	0.0125166	1.88292	up
MSTRG.81051.1	0.0619325	0.193341	0.0286432	1.32645	up
MSTRG.81669.27	0.00278275	0.191113	9.16e-05	2.93523	up
MSTRG.81678.9	0.0148748	0.166727	0.000674965	2.40665	up
MSTRG.82101.32	0.178185	0.300242	0.0281354	0.719712	up
MSTRG.82779.16	0.00841325	0.164566	0.00194457	2.31727	up
MSTRG.82779.23	0.0161355	0.122565	0.00540982	1.96016	up
MSTRG.82779.33	0.004994	0.245474	7.82e-06	3.24546	up
MSTRG.83216.1	0.0579737	0.136663	0.00835418	1.07564	up
MSTRG.83362.10	0.0588905	0.197113	0.0487033	1.23248	up
MSTRG.83678.1	0.208226	0.368073	0.0287241	0.761054	up
MSTRG.83834.8	0.024276	0.185748	0.0024345	2.05663	up
MSTRG.83935.3	0.0239758	0.148847	0.00173037	1.96686	up
MSTRG.84053.1	0.062744	0.110248	0.0434644	0.791439	up
MSTRG.84552.20	0.0168085	0.248459	0.00038407	2.51966	up
MSTRG.84605.38	0.00721675	0.041601	0.0320625	1.55976	up
MSTRG.84612.1	0.110868	0.218322	0.0192156	0.907183	up
MSTRG.86315.2	0.178052	0.320488	0.0015815	0.815325	up
MSTRG.86315.5	0.0980338	0.254724	0.0168608	1.22581	up
MSTRG.86635.4	0.0986335	0.217892	0.00695637	1.09208	up
MSTRG.86945.2	0.0295505	0.105935	0.0462311	1.30984	up
MSTRG.86957.1	0.133096	0.234549	0.039773	0.795831	up
MSTRG.88212.1	0.0635913	0.208615	0.00249779	1.47663	up
MSTRG.88959.8	0.0315667	0.149928	0.00376246	1.83455	up
MSTRG.89105.1	0.082853	0.177119	0.0409654	0.993377	up
MSTRG.89322.2	0.043913	0.20279	0.022222	1.55567	up
MSTRG.90461.1	0.0750028	0.220341	0.00809283	1.31329	up
MSTRG.90680.8	0.0173862	0.260833	0.0327263	1.6071	up
MSTRG.90820.11	0.02007	0.114518	0.0224163	1.64116	up
MSTRG.90953.1	0.0596505	0.182269	0.0402621	1.23149	up
MSTRG.91458.1	0.0456543	0.129052	0.0364633	1.21837	up
MSTRG.91503.8	0.0148048	0.095892	0.000629794	2.09218	up
MSTRG.91610.1	0.026721	0.125242	0.0147141	1.54777	up
MSTRG.92168.1	0.208191	0.340675	0.0301239	0.697737	up
MSTRG.92702.1	0.0411178	0.198542	0.000140545	1.942	up
MSTRG.92983.1	0.021401	0.133825	0.0224501	1.56518	up
MSTRG.93386.4	0.255527	0.405948	0.00695651	0.670087	up
MSTRG.93403.10	0.0648985	0.127557	0.00685838	0.964512	up
MSTRG.93750.1	0.028778	0.186383	3.25e-07	2.31309	up
MSTRG.93772.11	0.0193733	0.0722085	0.044054	1.34265	up
MSTRG.93947.1	0.264506	0.917817	0.0424004	1.31448	up
MSTRG.94904.2	0.0202375	0.197981	5.23e-06	2.55784	up
MSTRG.94909.1	0.118684	0.292586	0.0132497	1.1699	up
MSTRG.95666.15	0.004278	0.059595	0.00202575	2.25019	up
MSTRG.95734.1	0.0339072	0.115987	0.0195235	1.33289	up
MSTRG.95880.1	0.0522528	0.235528	3.91e-06	1.99756	up
MSTRG.96130.2	0.0325327	0.111128	0.00904766	1.52502	up
MSTRG.98545.84	0.0508137	0.372742	0.0177646	1.75765	up
MSTRG.98766.5	0.193702	0.338535	0.039324	0.818148	up
MSTRG.9896.5	0.137511	0.456442	0.0122656	1.44062	up
MSTRG.99077.2	0.081309	0.212133	0.00323928	1.25842	up
MSTRG.99830.1	0.0748247	0.161896	0.0426444	0.951614	up

## Sheet: Supplementary Table S2b
Table S2b Significanly differential expressed genes between susceptible and tolerable birds
Gene	S_FPKM	T_FPKM	Pvalue	log2FC	Direction
ACAT2	7.82357	3.4969	0.0039997	-0.647347	down
CD101	2.97294	1.10052	0.00816606	-0.641903	down
CRTAP	9.42741	4.76836	0.00767454	-0.619813	down
CUNH10orf71	3.45652	1.47435	0.00229542	-0.738411	down
CUNH1orf116	3.49851	1.11703	0.0150255	-0.586857	down
CUNH1orf198	21.2562	13.5057	0.00795727	-0.640618	down
DHX37	5.7962	2.83528	0.00372501	-0.686761	down
DNAJC19	4.14583	1.88741	1.41e-05	-0.724138	down
DUSP5	1.24578	0.713743	0.00376668	-0.620156	down
FAAH	6.18017	3.83526	0.00012019	-0.60292	down
FAM167A	1.78972	0.714755	0.0158574	-0.587106	down
FGF2	3.55892	2.42943	9.35e-07	-0.714664	down
HPSE	4.04028	2.27322	0.000229038	-0.73356	down
LOC102084847	8.91956	5.41111	0.0118057	-0.605572	down
LOC102085001	0.441223	0.111639	0.000246498	-0.892864	down
LOC102098806	0.493986	0.164247	1.85e-05	-1.04057	down
LPAR3	1.74896	0.448249	0.00348966	-0.694279	down
OSR2	7.99567	4.34593	0.0101148	-0.621259	down
PCBD1	1.61075	0.637427	0.0142077	-0.587603	down
PPP3R1	15.1089	8.49331	4.69e-05	-0.790722	down
RGS10	6.45502	1.45172	1.41e-05	-1.05932	down
RGS11	0.986214	0.569211	0.00698565	-0.591736	down
STRN	7.29541	3.01491	0.00697504	-0.590004	down
VASH1	9.83919	5.54553	0.00121899	-0.746016	down
WDR20	1.41787	0.739289	0.00297157	-0.697412	down
YWHAG	6.93253	1.8835	7.93e-05	-0.961523	down
Columba_livia_newGene_3167	0.65931	0	3.4e-51	-3.61179	down
Columba_livia_newGene_5345	0.660831	0.48807	0.00676104	-0.60139	down
Columba_livia_newGene_8799	0.708069	0.081164	0.000144919	-0.870807	down
Columba_livia_newGene_15903	20.4057	11.6531	4.08e-05	-0.876252	down
Columba_livia_newGene_24396	0.806588	0.411129	0.00783112	-0.623623	down
Columba_livia_newGene_86339	0.513002	0.261301	3.44e-05	-0.873328	down
Columba_livia_newGene_90140	0.352125	0	1.48e-10	-1.48539	down
Columba_livia_newGene_90309	0.446388	0.142893	0.00178478	-0.747372	down
ACADM	18.5292	37.8884	0.00855466	0.632975	up
AMER3	1.03593	1.72211	0.00421013	0.590383	up
ANKRD1	11.5647	68.4925	0.000236118	0.857743	up
CGGBP1	2.67125	5.80558	0.00306843	0.709788	up
CHGB	9.35184	15.5681	6.28e-05	0.661739	up
CUNH9orf78	3.25243	6.33397	0.00828777	0.605868	up
DDIT4	10.4479	17.8491	1.81e-05	0.694049	up
FAM76A	1.99123	5.51583	0.000625139	0.833349	up
GCNT7	0.925447	1.64545	0.00947561	0.592746	up
GHDC	0.702886	1.29507	0.00281071	0.68036	up
HAO1	0.576018	2.56685	5.22e-05	0.965569	up
HSPH1	6.68396	14.8267	0.0120362	0.610185	up
IGSF21	1.00029	2.37606	0.00393903	0.698711	up
LOC102084454	0.733375	1.47165	0.00505349	0.630541	up
LOC102084708	1.00845	3.06004	0.000821099	0.816216	up
LOC102086122	5.29101	14.2521	0.00393108	0.703597	up
LOC102086561	0.801621	1.70868	0.0109091	0.621069	up
LOC102087856	8.73559	21.6653	0.00877594	0.63943	up
LOC102089597	12.5831	27.0676	0.00986611	0.627896	up
LOC102090214	11.7241	33.8794	0.00578682	0.668521	up
LOC102098485	4.66924	9.31385	0.00240632	0.68293	up
LOC106145774	0.283724	0.593706	0.0102273	0.593002	up
LOC110355096	1.23255	2.40051	0.0136565	0.586951	up
LOC110356420	1.86694	6.78069	0.00533366	0.659639	up
LOC110364088	1.85537	3.68324	0.00134371	0.710423	up
MATN3	5.29488	11.7794	0.00941136	0.63348	up
RRAD	5.57579	21.0272	0.00963461	0.590094	up
RSAD2	0.475096	1.40745	0.000502134	0.825209	up
SAMD9L	1.21286	2.76773	0.0103673	0.624069	up
SLC38A6	2.80798	4.02506	0.00454712	0.668159	up
SMIM4	8.97135	15.7324	0.000649983	0.682864	up
SOCS3	3.20402	11.8828	0.00914095	0.598229	up
STEAP1	2.16801	5.14015	0.00522323	0.681122	up
TMED5	2.88594	14.8121	6.04e-06	1.10308	up
TRADD	1.40627	1.18073	0.00919623	0.619858	up
TRMT10C	0	2.59795	2.98e-07	1.12477	up
UBC	0.883133	6.48205	0.00337073	0.614585	up
USP18	2.44893	5.08895	5.15e-07	1.0195	up
Columba_livia_newGene_776	0.602412	1.1712	0.00259855	0.649662	up
Columba_livia_newGene_1546	0.307078	0.8014	0.000861165	0.800883	up
Columba_livia_newGene_4033	1.32333	2.10348	0.0067852	0.640612	up
Columba_livia_newGene_7118	1.50916	2.88161	0.00595836	0.632172	up
Columba_livia_newGene_8106	0.159044	0.384883	0.00474713	0.687223	up
Columba_livia_newGene_15973	0.572162	0.935905	0.00785988	0.621702	up
Columba_livia_newGene_23141	0.498706	0.802329	0.00013559	0.865779	up
Columba_livia_newGene_25935	0.166277	0.60471	0.00687902	0.631225	up
Columba_livia_newGene_34576	0.173114	0.36948	0.0101427	0.61383	up
Columba_livia_newGene_35856	0.22444	0.787528	0.000205123	0.903057	up
Columba_livia_newGene_45293	0.476479	1.12279	0.00670053	0.650856	up
Columba_livia_newGene_47212	0.189029	0.575958	0.000331917	0.873532	up
Columba_livia_newGene_48016	1.17807	2.19376	0.000568024	0.695207	up
Columba_livia_newGene_68442	18.352	66.1894	0.000386688	0.865241	up
Columba_livia_newGene_70329	0.285363	0.589803	0.0148278	0.590989	up
Columba_livia_newGene_71448	1.68276	4.59452	0.000153323	0.880225	up
Columba_livia_newGene_71547	0.844331	1.75089	0.00335166	0.694075	up
Columba_livia_newGene_72814	0.167437	0.559464	0.00437053	0.694478	up
Columba_livia_newGene_76246	0.0330555	0.121008	0.00367993	0.690636	up
Columba_livia_newGene_76279	0.575221	1.66218	0.00143518	0.692814	up
Columba_livia_newGene_88572	0.0750028	0.220341	0.0108583	0.611399	up
Columba_livia_newGene_90647	0.067082	0.253445	0.00498043	0.657144	up
Columba_livia_newGene_91007	0.798325	1.5522	0.00329767	0.710414	up

## Sheet: Supplementary Table S2c
Table S2c Significanly differential expressed lncRNAs between uninfected and tolerable birds
LncRNA transcript	N_FPKM	T_FPKM	Pvalue	log2FC	Direction
MSTRG.100022.1	0.323264	0.109925	0.0173872	-1.2206	down
MSTRG.100022.3	0	0.123356	0.000162749	3.2817	up
MSTRG.100022.6	0	0.65696	0.0310314	1.88521	up
MSTRG.100022.7	0.00966367	0.267331	4.89e-05	3.18906	up
MSTRG.100123.1	0.206179	0.0349485	0.00452902	-1.88616	down
MSTRG.100125.1	0.297357	0.0999282	0.0256222	-1.21033	down
MSTRG.100267.1	0.425888	0.591852	0.0371672	0.648633	up
MSTRG.100307.1	0.511777	0.270716	0.00654817	-0.711238	down
MSTRG.100601.2	0.450252	0.73573	0.0192931	0.88977	up
MSTRG.100603.49	0.393845	0.0452258	0.00841262	-2.05261	down
MSTRG.100767.2	0.376998	0.690037	0.0314767	1.00883	up
MSTRG.101060.28	0.083713	0.399798	0.0203271	1.83076	up
MSTRG.101075.1	0.284368	0.0165308	0.0215718	-2.02669	down
MSTRG.101373.2	0.1401	0.326534	0.00304342	1.33201	up
MSTRG.101378.78	0.190774	0.022087	0.021156	-1.89828	down
MSTRG.101427.1	0.209826	0.0939045	0.0242322	-0.864069	down
MSTRG.101447.13	0.112692	0.00099425	0.00010246	-3.37164	down
MSTRG.101929.3	0.0455323	0.142597	0.048264	1.34736	up
MSTRG.102015.2	0	0.173697	3.04e-05	3.59953	up
MSTRG.102168.1	0.0149157	0.0821875	0.00854729	2.01692	up
MSTRG.102423.2	0	0.487509	3.79e-05	3.57812	up
MSTRG.102423.4	0	0.500927	0.0299034	1.89922	up
MSTRG.102423.5	0	0.318476	3e-05	3.61392	up
MSTRG.10245.1	0.0992433	0.189678	0.0166279	1.04875	up
MSTRG.102810.19	0	0.303895	0.0139124	2.16712	up
MSTRG.102814.3	0.0255233	0.278773	0.00302609	2.43135	up
MSTRG.103079.1	0.045921	0.154058	0.0377643	1.49286	up
MSTRG.103505.1	0.60014	0.332958	0.0039662	-0.614069	down
MSTRG.10394.3	0.457545	0.216726	0.0273162	-0.826196	down
MSTRG.104435.18	0	0.179775	0.000832399	2.94187	up
MSTRG.10446.1	0.335066	0.056951	0.0273452	-1.71768	down
MSTRG.10446.2	0.188918	0.03176	0.00195018	-1.88885	down
MSTRG.104528.3	0.0297893	0.157786	0.0419756	1.69268	up
MSTRG.104530.7	0.206913	0	1.11e-07	-4.2735	down
MSTRG.105192.1	0.154108	0.285915	0.0374191	0.99685	up
MSTRG.105218.12	0.0271753	0.416178	0.0459272	1.76282	up
MSTRG.105622.45	0	0.126229	0.00820721	2.33467	up
MSTRG.105632.2	0.786328	0.199457	0.0258323	-1.46315	down
MSTRG.105864.38	1.66596	0	5.99e-12	-5.30877	down
MSTRG.105872.2	0.052593	0.272763	0.000141018	2.1883	up
MSTRG.106021.2	0.196648	0.0200588	0.00301074	-2.2391	down
MSTRG.106024.48	0.010239	0.22148	0.0291808	1.92629	up
MSTRG.106298.1	0.115851	0.295525	0.0296005	1.29559	up
MSTRG.106336.1	0.163395	0.56249	0.0444719	1.47769	up
MSTRG.106410.2	0.679405	0.0560665	0.0215446	-1.98252	down
MSTRG.106997.24	0.235446	0	3.8e-15	-5.92434	down
MSTRG.107262.2	0.181033	0.0569713	0.0429006	-1.18087	down
MSTRG.107702.1	0.503055	0.671265	0.0358381	0.610426	up
MSTRG.107773.1	0.076137	0.128335	0.0228489	0.878519	up
MSTRG.108159.2	0.003911	0.0981082	0.00083113	2.76497	up
MSTRG.108236.3	0.151194	0	6.01e-15	-5.93865	down
MSTRG.108262.2	0.20796	0.0424278	0.0447342	-1.5856	down
MSTRG.108315.1	0	0.0403935	0.0211065	2.02774	up
MSTRG.108315.2	0.00755	0.13688	5.64e-05	3.13522	up
MSTRG.108368.1	0.000322	0.114221	0.00774181	2.34657	up
MSTRG.108600.6	0	0.106169	0.0071906	2.37405	up
MSTRG.10914.1	0.0910567	0.153358	0.019989	0.913729	up
MSTRG.109200.1	0.153077	0.295072	0.042676	1.02269	up
MSTRG.109472.3	0.249454	0.0310315	0.00184457	-2.17731	down
MSTRG.109646.2	0.148907	0	1.23e-07	-4.50651	down
MSTRG.109679.1	0.184372	0.0374408	0.0238464	-1.54391	down
MSTRG.109725.13	0.860838	0.0471135	4.12e-06	-3.1388	down
MSTRG.109909.34	0.0831467	0.132543	0.0246485	0.845676	up
MSTRG.110227.2	0.176306	0.0243415	0.0244337	-1.83588	down
MSTRG.11036.13	0.95057	5.55158	0.0207409	1.92116	up
MSTRG.110716.1	0.0296533	0.166802	0.0261918	1.78588	up
MSTRG.110865.32	0.108751	0.174656	0.0480463	0.82569	up
MSTRG.111019.6	0.288576	0.0287185	0.000857892	-2.3847	down
MSTRG.111458.13	0.0109953	0.150868	0.000149454	2.81017	up
MSTRG.111496.41	4.52696	2.12199	0.0207907	-0.882164	down
MSTRG.111501.30	6.5e-05	0.247754	6.28e-10	5.0277	up
MSTRG.111554.41	0.304812	0.769622	0.00499262	1.45234	up
MSTRG.112006.3	0.0807467	0.320972	0.00119573	1.86756	up
MSTRG.112009.1	0.275202	0.45108	0.00750415	0.922952	up
MSTRG.112028.1	0.250118	0.513229	0.0257888	1.10584	up
MSTRG.112034.1	0.120831	0.273029	0.00979409	1.24801	up
MSTRG.112035.11	0.270596	0.104826	0.0208527	-1.04499	down
MSTRG.112897.5	0.74612	0.00032525	1.78e-12	-5.62855	down
MSTRG.113346.1	0.038553	0.158118	0.0270196	1.59133	up
MSTRG.113399.1	0.358806	0.583629	0.0426833	0.833753	up
MSTRG.113660.8	0	0.218948	0.0129577	2.19028	up
MSTRG.113668.1	0.307523	0.132749	0.0338909	-0.92335	down
MSTRG.114049.50	0.73457	0	3.13e-09	-5.04724	down
MSTRG.114339.2	0	0.204772	0.0260542	1.95011	up
MSTRG.114365.1	0.0882953	0.162506	0.0107329	1.03476	up
MSTRG.114540.51	0.05236	0.313388	0.0291635	1.74905	up
MSTRG.114665.10	0	0.152356	0.0219791	2.01225	up
MSTRG.114696.1	0.0240537	0.125366	0.0133975	1.85906	up
MSTRG.114701.4	0.310362	0.117896	0.0192804	-1.11159	down
MSTRG.114731.7	0	0.17167	0.0324858	1.86952	up
MSTRG.114849.42	0.211417	0.01327	0.0364936	-1.84716	down
MSTRG.114891.28	0.0374653	0.00423575	0.00435482	-2.11953	down
MSTRG.114917.1	0.0968483	0.252704	0.0305422	1.20708	up
MSTRG.114919.1	0.314062	0.114503	0.0490634	-0.993263	down
MSTRG.114923.1	0.355159	0.0906138	0.0479066	-1.41327	down
MSTRG.115236.1	0.286712	0.796486	0.00241116	1.52415	up
MSTRG.115628.11	0	0.422117	0.0332235	1.85951	up
MSTRG.115636.20	0.00554933	0.209966	8.98e-05	3.26168	up
MSTRG.115662.43	0.00148767	0.121797	0.00700784	2.37814	up
MSTRG.115680.2	0	0.17631	7.33e-07	4.08343	up
MSTRG.115732.1	0.129396	0.206758	0.0493522	0.796832	up
MSTRG.115733.3	0.0380447	0.123276	0.0478565	1.43601	up
MSTRG.115790.1	0.0587307	0.151875	0.043961	1.29632	up
MSTRG.115870.2	0.016893	0.254597	0.0194382	2.04129	up
MSTRG.115873.1	0.123036	0.360119	0.010913	1.49531	up
MSTRG.116065.1	0.0849203	0.291207	0.000769991	1.67546	up
MSTRG.116106.1	0.266715	0.0747915	0.0101671	-1.38095	down
MSTRG.116136.46	0.283736	0.126771	0.0206209	-0.926598	down
MSTRG.116147.1	0.436173	0.236145	0.0305295	-0.653154	down
MSTRG.116345.11	0.153891	1.95e-05	3.83e-08	-4.39655	down
MSTRG.116372.3	0	0.148022	0.016753	2.10531	up
MSTRG.116702.17	0.0396373	0.364233	0.00589847	2.20359	up
MSTRG.11718.6	0.001723	0.0116618	0.0191311	1.89256	up
MSTRG.117305.16	0.0480837	0.173689	0.0399371	1.50066	up
MSTRG.117323.1	0.512492	0.175875	0.0193558	-1.15252	down
MSTRG.117449.2	0.001711	0.037376	0.0219375	2.0219	up
MSTRG.11790.12	0.519944	1.27864	0.0210047	1.33076	up
MSTRG.118080.2	0	0.271888	2.83e-16	6.22484	up
MSTRG.118316.1	0.061528	0.175141	0.0426629	1.35483	up
MSTRG.118620.1	0.0413503	0.132252	0.0241015	1.50221	up
MSTRG.118936.40	0	0.396012	0.0410269	1.77761	up
MSTRG.119139.1	0.388365	0	5.13e-07	-4.19375	down
MSTRG.119140.1	0.250025	0.066215	0.0308981	-1.38961	down
MSTRG.119331.19	0.523442	1.31342	0.000509371	1.40195	up
MSTRG.119806.9	0.132446	0.742538	0.00051932	2.29272	up
MSTRG.120038.1	0.158057	0.0635823	0.00988848	-0.999302	down
MSTRG.120156.2	0	0.141509	1.32e-09	4.90771	up
MSTRG.120203.1	0.0576707	0.238233	0.0479891	1.5314	up
MSTRG.120229.98	0	0.296047	0.0440641	1.75052	up
MSTRG.120327.1	0.284901	0.114683	0.000540235	-1.02944	down
MSTRG.120328.1	0.187273	0.0842512	0.0287146	-0.843469	down
MSTRG.120331.2	0.271136	0.00455125	1.35e-06	-3.6898	down
MSTRG.120332.1	0.248232	0.117683	0.0462095	-0.76341	down
MSTRG.120364.43	0.0882893	0.0125515	0.00112067	-2.07291	down
MSTRG.12077.2	0.0262813	0.195382	0.0222407	1.90984	up
MSTRG.12083.1	0.202864	0.434893	0.000852562	1.2337	up
MSTRG.120959.1	0.152445	0.509768	0.0362663	1.47111	up
MSTRG.121255.1	0.726998	0.40379	0.042423	-0.589368	down
MSTRG.121455.1	0.268006	0.0153907	0.000605553	-2.6364	down
MSTRG.12148.2	0.132393	0.230717	0.0426812	0.967026	up
MSTRG.121743.7	0.38007	0.0149202	0.0390007	-1.80669	down
MSTRG.121917.1	0.212252	0.077234	0.0446684	-1.12274	down
MSTRG.122840.4	0.239798	0.0181553	0.0130036	-2.13607	down
MSTRG.123018.6	0.0799113	0.338025	0.00734398	1.81426	up
MSTRG.123018.7	0.098842	0.273677	0.0106835	1.50083	up
MSTRG.123762.2	0	0.079927	0.0173471	2.09396	up
MSTRG.123792.1	0.322402	0.168761	0.0492637	-0.677995	down
MSTRG.123871.1	0.0531827	0.155266	0.0251717	1.45148	up
MSTRG.124238.1	0.327012	0.457693	0.0246317	0.688881	up
MSTRG.124389.4	0.007674	0.236773	0.0314369	1.90033	up
MSTRG.124826.6	0.183033	0.00920725	3.09e-06	-3.27029	down
MSTRG.124826.7	0	0.079178	0.0215427	2.01865	up
MSTRG.124826.8	0	0.063783	0.0105178	2.25727	up
MSTRG.12518.65	0.108832	0	5.51e-14	-5.63596	down
MSTRG.125328.4	0.156522	0.333527	0.0174544	1.159	up
MSTRG.125629.2	0.243836	0.0985532	0.0452016	-1.01644	down
MSTRG.126306.1	0.326691	0.102673	0.0252908	-1.2195	down
MSTRG.126318.54	0.086892	0.282482	0.0119069	1.581	up
MSTRG.126318.70	0.320187	0.127453	0.0216848	-1.03178	down
MSTRG.126330.3	0.4249	0.176548	0.0481757	-0.950719	down
MSTRG.127024.2	0.0795483	0.158614	0.0489836	1.06439	up
MSTRG.127128.3	0.0586867	0.174066	0.0278818	1.46949	up
MSTRG.127234.20	0.192844	0.00317275	0.0460739	-1.70312	down
MSTRG.127373.1	0.246701	0.529459	0.0286783	1.15842	up
MSTRG.127508.1	0.158982	0.0228925	0.00122108	-1.99409	down
MSTRG.127508.6	0.011091	0.121656	0.00268997	2.39757	up
MSTRG.127566.27	0	0.0921515	0.0175149	2.09004	up
MSTRG.127643.1	0.106783	0.297831	4.42e-06	1.60023	up
MSTRG.128083.1	3.176	4.48117	0.00579944	0.720266	up
MSTRG.12874.1	0.0707283	0.141671	0.0416169	1.04859	up
MSTRG.129437.3	0.267103	0.0271447	0.00344508	-2.17702	down
MSTRG.130173.28	0.291294	0.0569528	0.0224616	-1.68997	down
MSTRG.130204.38	0.110792	0	5.09e-16	-5.92137	down
MSTRG.1303.1	0.087653	0.584933	0.00259459	2.24738	up
MSTRG.130448.1	0.307813	0.100185	0.0491816	-1.23698	down
MSTRG.130562.2	0.143158	0.0141035	0.0255278	-1.88338	down
MSTRG.130570.8	0	0.266927	0.00798537	2.34217	up
MSTRG.130679.2	0.02725	0.130541	0.0367077	1.70271	up
MSTRG.130780.32	0.231255	2.70855	0.0138908	2.11248	up
MSTRG.130796.55	0.0345633	0.14303	0.011364	1.7781	up
MSTRG.130874.1	0.0215003	0.196213	0.0439139	1.76126	up
MSTRG.130959.11	0.061699	0.291028	0.040124	1.68248	up
MSTRG.130959.16	0.0211783	0.228075	0.0442621	1.77478	up
MSTRG.130999.2	0.182685	0	1.49e-09	-4.81874	down
MSTRG.131137.1	0.255377	0.118947	0.00594375	-0.830911	down
MSTRG.131250.3	0	0.222901	0.000496317	3.05593	up
MSTRG.131250.6	0.000325333	0.0762427	0.04941	1.71252	up
MSTRG.131251.27	0.247915	0.0362805	0.0393472	-1.71434	down
MSTRG.131391.1	0.0857333	0.215352	0.0202528	1.27491	up
MSTRG.131701.50	0.100683	0.651631	0.0396877	1.7738	up
MSTRG.131732.1	0.0912657	0.17842	0.0284714	1.05093	up
MSTRG.131832.2	0.180106	0.0206065	0.0210347	-1.94222	down
MSTRG.132174.1	0.0393193	0.0954475	0.0286608	1.25264	up
MSTRG.132746.84	2.2e-05	0.285411	0.00198759	2.72628	up
MSTRG.132775.1	0.273263	0.394594	0.0180147	0.725452	up
MSTRG.132834.12	0.213373	0.02784	0.0453379	-1.70636	down
MSTRG.132865.10	0.618265	0.013392	0.00853467	-2.32311	down
MSTRG.132981.6	0.0125213	0.102656	0.0297266	1.87018	up
MSTRG.133001.1	0.000357333	0.129032	0.00248081	2.65059	up
MSTRG.133007.1	1.16043	0.659047	0.00578412	-0.597427	down
MSTRG.133135.14	0.270575	0.0602697	0.0266841	-1.52167	down
MSTRG.133135.15	0	0.294499	0.019837	2.04707	up
MSTRG.133135.5	0	0.399574	2.87e-06	3.99116	up
MSTRG.133257.1	0.05121	0.174631	0.0319708	1.47897	up
MSTRG.133478.20	0.0648997	0.33241	0.0115865	1.913	up
MSTRG.133500.14	0	2.95388	0.000236891	3.22249	up
MSTRG.133537.1	0.0688383	0.149275	0.02346	1.18971	up
MSTRG.133552.1	0.0410457	0.136553	0.0346668	1.48599	up
MSTRG.1337.6	0.0114253	0.15159	0.000540177	2.60016	up
MSTRG.133755.1	0.744424	1.17715	0.00536568	0.85624	up
MSTRG.133952.1	0.087228	0.225271	0.0140928	1.40315	up
MSTRG.133953.15	0.00749233	0.128555	0.0324679	1.88531	up
MSTRG.133953.4	0.20643	0.482298	0.0386873	1.21993	up
MSTRG.134123.4	0.076621	0.311025	0.00354441	1.88491	up
MSTRG.134129.1	0.155971	0.349554	0.0135496	1.20249	up
MSTRG.134822.1	0.0558057	0.15578	0.0284709	1.31363	up
MSTRG.134933.12	0.196241	0.0634923	0.0149906	-1.23693	down
MSTRG.135045.4	0.294615	0.0884535	0.018755	-1.30482	down
MSTRG.135134.27	0	0.113537	0.00512884	2.47153	up
MSTRG.135134.37	0.00458433	0.161236	0.00452988	2.47939	up
MSTRG.135145.3	0	0.149952	0.00416488	2.52647	up
MSTRG.135280.1	0.045124	0.137013	0.0403937	1.42826	up
MSTRG.135355.3	2.01118	0.0132272	0.000622969	-3.02077	down
MSTRG.135484.1	0.069673	0.176895	4.52e-06	1.48413	up
MSTRG.135550.16	0.719809	0.382782	0.0120866	-0.662129	down
MSTRG.135945.1	0.0759133	0.273998	0.0216328	1.49083	up
MSTRG.135998.1	0.0303067	0.162132	0.027287	1.77298	up
MSTRG.136018.22	0.098556	1.31021	0.045438	1.76576	up
MSTRG.136018.25	0.386022	0.0231433	0.0197766	-2.03774	down
MSTRG.136168.1	0.316046	0.663613	0.0111604	1.16142	up
MSTRG.136235.19	0.239111	0.0354148	0.034851	-1.73436	down
MSTRG.136235.32	0	0.193307	0.0277741	1.92641	up
MSTRG.136605.1	0.0129617	0.140833	0.0114143	2.15686	up
MSTRG.136741.2	0.184568	0.279534	0.0202013	0.79534	up
MSTRG.136806.1	0.191268	0.273143	0.0396062	0.693392	up
MSTRG.137144.4	0.00121333	0.219509	9.77e-07	3.88628	up
MSTRG.137465.11	1.76496	0.448854	0.0395155	-1.42939	down
MSTRG.137500.1	0.604611	0.225327	0.0495292	-1.06242	down
MSTRG.137546.1	0.083649	0.0409915	0.0479041	-0.783065	down
MSTRG.13757.22	0.344691	0.0258878	0.0394978	-1.81423	down
MSTRG.137579.4	0	0.153884	0.00399606	2.54057	up
MSTRG.137803.10	0.249827	0.507464	0.0144032	1.126	up
MSTRG.137806.9	0	0.207273	0.019712	2.04953	up
MSTRG.138138.2	0.166823	0.521814	0.0469449	1.42087	up
MSTRG.138599.18	0.12553	0.300984	0.0248911	1.3294	up
MSTRG.139402.25	0.416996	0.804586	0.0254569	1.06411	up
MSTRG.139437.31	0.134514	3.525e-05	2.83e-07	-4.27545	down
MSTRG.139568.3	0.176314	0.324718	0.0273135	1.03028	up
MSTRG.139909.1	0.139529	0.357106	0.000436434	1.50462	up
MSTRG.139916.5	0	0.13698	3.8e-06	3.78747	up
MSTRG.140078.10	0.183738	0.0146468	0.049226	-1.73522	down
MSTRG.140078.7	0.351665	0.105226	0.0407159	-1.25813	down
MSTRG.14034.3	0.067038	0.236474	0.00358209	1.70698	up
MSTRG.140356.14	0.092851	0.184451	0.0237119	1.06895	up
MSTRG.140649.1	0.0351977	0.149096	0.018244	1.65291	up
MSTRG.140799.3	0.0767827	0.123554	0.0192422	0.851545	up
MSTRG.140975.27	0.0396543	0.210154	0.00199237	2.04244	up
MSTRG.14134.7	0.001073	0.192305	0.0122205	2.16709	up
MSTRG.141356.1	0.186404	0.292507	0.0280018	0.82143	up
MSTRG.141575.3	0.247766	0.010574	0.00291864	-2.55835	down
MSTRG.141700.33	0.08812	0.170611	0.0453777	1.0232	up
MSTRG.141732.1	0.166659	0.0605705	0.0331979	-1.09665	down
MSTRG.142137.2	0.105244	0.537	0.0346995	1.697	up
MSTRG.142352.1	0.335209	0.0687585	0.0024311	-1.70532	down
MSTRG.142466.1	0.210676	0.0693452	0.00269289	-1.25627	down
MSTRG.142571.2	0.136813	0.268383	0.00690611	1.11401	up
MSTRG.142573.14	0.25205	0.00462675	5.28e-06	-3.68781	down
MSTRG.142810.12	6e-05	0.186113	0.000133179	3.33095	up
MSTRG.142810.13	0.249118	0.0013155	0.00315154	-2.59898	down
MSTRG.142810.42	0	0.17041	1.7e-21	6.89865	up
MSTRG.143046.33	0	0.140301	0.0160553	2.12034	up
MSTRG.143046.35	0.024749	0.0675375	0.0090693	1.43875	up
MSTRG.143079.3	0.163522	0.0431267	0.0104715	-1.41834	down
MSTRG.143230.1	0.364131	0.116542	0.02881	-1.18802	down
MSTRG.143278.1	0.130284	0.207929	0.0494758	0.865638	up
MSTRG.143325.1	0.0997207	0.417579	0.0151348	1.69693	up
MSTRG.143339.1	0.0366837	0.100592	0.0288914	1.31512	up
MSTRG.143526.1	0.125399	0.27559	0.0433505	1.22662	up
MSTRG.143673.21	0	0.119138	1.08e-07	4.44314	up
MSTRG.143749.25	0.12883	0	6.23e-14	-5.9724	down
MSTRG.143749.45	0.111785	0.001711	0.0194482	-2.0428	down
MSTRG.143818.3	0.323441	0.123194	0.0189005	-1.13874	down
MSTRG.143818.7	0	0.156473	2.87e-09	4.86528	up
MSTRG.143976.4	0.001884	0.0907885	0.0198947	2.0564	up
MSTRG.144004.1	0.153703	0.0529558	0.0374827	-1.15912	down
MSTRG.144121.1	0.399264	0.149588	0.0273859	-1.04448	down
MSTRG.144519.21	0.28481	0.101268	0.0426033	-1.12843	down
MSTRG.144591.1	0.0854023	0.326607	0.0382593	1.57457	up
MSTRG.144615.2	0.0368723	0.229543	0.025046	1.86476	up
MSTRG.144940.13	0.001358	0.084483	0.00960861	2.28591	up
MSTRG.145459.1	0.0748397	0.194118	0.0131875	1.36745	up
MSTRG.145840.1	0.118632	0.206752	0.0321925	0.930126	up
MSTRG.146439.23	0.240588	0.0725868	0.000493757	-1.40079	down
MSTRG.146439.7	0.042373	0.199884	0.0281387	1.70662	up
MSTRG.146439.9	0.218085	0.0711882	0.0301813	-1.19578	down
MSTRG.146468.1	1.28688	0.18409	0.00267901	-2.02635	down
MSTRG.14657.1	0	0.241738	0.00790674	2.34596	up
MSTRG.147082.1	0.134308	0.042304	0.0390011	-1.23522	down
MSTRG.147176.5	0.114764	0.337306	0.0460976	1.44169	up
MSTRG.147297.14	0.520891	0.0599175	0.0277165	-1.86924	down
MSTRG.147846.1	0.162817	0.240487	0.0224014	0.750696	up
MSTRG.147897.2	0.0310217	0.188633	0.0284538	1.79999	up
MSTRG.148153.1	0.321338	0.150132	0.0107605	-0.851439	down
MSTRG.14829.1	0.403233	0.137197	0.0496461	-1.11445	down
MSTRG.148430.3	8.76667e-05	0.754972	0.0180946	2.08237	up
MSTRG.148529.1	0.0559737	0.168366	0.0387248	1.40012	up
MSTRG.148598.2	0.317437	0.0860507	0.049711	-1.28138	down
MSTRG.1487.1	0.0436753	0.0938965	0.0291185	1.17965	up
MSTRG.148784.5	0.302498	0.0612685	0.00277009	-1.81856	down
MSTRG.148883.1	0.029402	0.0916862	0.0196165	1.39861	up
MSTRG.148905.39	0	0.400813	8.81e-05	3.39375	up
MSTRG.148961.1	1.06481	0.338645	0.0120722	-1.29007	down
MSTRG.148961.2	0.341067	0.109941	0.0167982	-1.24257	down
MSTRG.148961.8	0	0.121382	0.00374654	2.55646	up
MSTRG.148973.1	0.108504	0.429266	0.0218791	1.6955	up
MSTRG.148975.2	0.00711267	0.11702	0.000754114	2.6481	up
MSTRG.148975.4	0.002277	0.138024	7.25e-06	3.50496	up
MSTRG.148975.48	0	0.403433	0.00350136	2.57284	up
MSTRG.149224.1	0.527781	0.739639	0.00842228	0.677707	up
MSTRG.14924.1	0.0832747	0.320784	0.0204055	1.47177	up
MSTRG.149308.4	2.27397	0.216046	0.0103596	-2.10972	down
MSTRG.149341.1	0.210338	0.088273	0.0161897	-0.946671	down
MSTRG.149638.1	0.0235037	0.21284	0.00422065	2.27713	up
MSTRG.149750.2	0.0529157	0.188491	0.0205088	1.55792	up
MSTRG.150246.1	0.354373	0.112172	0.0139226	-1.29136	down
MSTRG.150247.1	0.323894	0.0721192	0.0446793	-1.3269	down
MSTRG.150251.1	0.196706	0.093195	0.0210058	-0.81371	down
MSTRG.150256.6	0.0857497	1.98929	0.00104401	2.75841	up
MSTRG.150434.4	0	0.357226	0.0150719	2.14043	up
MSTRG.150626.3	0	0.152	0.00560952	2.44613	up
MSTRG.150645.41	0.469119	0.101724	0.0224268	-1.58651	down
MSTRG.150879.1	0.0427827	0.310347	1.12e-05	2.40965	up
MSTRG.150880.1	0.0469993	0.155968	0.0214701	1.47426	up
MSTRG.150897.10	0	0.23138	0.0104879	2.26005	up
MSTRG.150897.19	0	0.443412	0.00499229	2.47963	up
MSTRG.151580.1	0.0404243	0.12085	0.0337541	1.39924	up
MSTRG.151594.38	0.014553	0.227705	0.00137947	2.62118	up
MSTRG.151599.6	0.0680393	0.00312325	0.00937321	-2.28149	down
MSTRG.15216.1	0.45478	0.0523793	0.0278891	-1.86102	down
MSTRG.152190.1	0.119116	0.267966	0.0478649	1.14248	up
MSTRG.15240.45	0.006402	0.330306	0.00193779	2.71118	up
MSTRG.15240.48	0.04343	0.174159	0.0338504	1.67453	up
MSTRG.152515.2	1.09608	0.02086	0.00323151	-2.59986	down
MSTRG.153048.89	0	0.18721	0.00946932	2.2904	up
MSTRG.153141.1	0.953406	0.329582	0.0239936	-1.20035	down
MSTRG.153229.4	0.0498357	0.010272	0.0136505	-1.61045	down
MSTRG.153424.14	0.187571	0	7.72e-09	-4.61337	down
MSTRG.153424.17	0.000827667	0.329398	0.00079461	2.92816	up
MSTRG.153518.1	0.130184	2.13815	0.000548841	2.79035	up
MSTRG.153518.2	0.104395	0.862452	0.00427392	2.25924	up
MSTRG.153522.2	0.000526	0.226459	4.33e-07	4.20666	up
MSTRG.153653.2	0	0.452285	0.00892033	2.30878	up
MSTRG.153686.42	0.38111	0.00844825	0.0107755	-2.24724	down
MSTRG.153713.2	0	1.66853	0.0212481	2.02306	up
MSTRG.153724.1	1.08343	0.020318	0.00500417	-2.47911	down
MSTRG.154096.1	0.0669403	0.15753	0.0469059	1.17313	up
MSTRG.1541.10	0.227307	0.0985395	0.0403156	-0.85949	down
MSTRG.154625.3	0.0353693	0.141176	0.0345459	1.59995	up
MSTRG.154625.5	0.241925	0.0726305	0.0397559	-1.27036	down
MSTRG.15481.1	0.10695	0.25454	0.0497284	1.21842	up
MSTRG.15481.2	0.228008	0.0013655	2.13e-05	-3.68463	down
MSTRG.154980.1	0.8822	1.73802	0.0216042	1.09327	up
MSTRG.154990.3	0.413675	0.076099	0.00445843	-1.85014	down
MSTRG.155194.1	0.0580133	0.179727	0.0251677	1.49634	up
MSTRG.155194.4	0.232883	0.0403818	0.0230685	-1.6541	down
MSTRG.155239.4	0.043135	0.279603	0.000939496	2.2784	up
MSTRG.155397.5	89.5288	8.36801	0.0364011	-1.81434	down
MSTRG.15541.42	0.010318	0.227554	0.00126017	2.72453	up
MSTRG.155472.3	0.950621	1.22533	0.0189629	0.600646	up
MSTRG.155751.29	0	0.138687	0.00160509	2.78117	up
MSTRG.155918.1	0.689449	0.009456	4.35e-11	-4.52256	down
MSTRG.156018.37	0.918044	0.0791605	0.0168651	-2.02668	down
MSTRG.156087.1	0.589374	0.0349553	0.00295104	-2.48648	down
MSTRG.156091.4	0.891916	0.005325	2.83e-10	-4.6584	down
MSTRG.156300.2	0	0.181306	4.93e-07	4.05069	up
MSTRG.156449.1	0	0.246804	1.2e-06	3.97438	up
MSTRG.156449.2	0.00316767	0.232487	0.00725519	2.36826	up
MSTRG.156484.3	0.173352	0.593634	0.0377328	1.58666	up
MSTRG.156505.1	0.0574943	0.294527	0.0492736	1.62298	up
MSTRG.156558.6	0	0.199436	0.0057293	2.43965	up
MSTRG.156699.11	0	0.344279	0.00281125	2.62932	up
MSTRG.156832.5	0.000308333	0.413206	5.09e-06	3.57424	up
MSTRG.156920.11	0.026813	0.623904	0.0432844	1.78282	up
MSTRG.156949.2	0	0.226482	0.00403832	2.53356	up
MSTRG.157134.2	0.948752	0.0165525	0.0466206	-1.69769	down
MSTRG.160673.1	0	0.174143	0.00647521	2.40483	up
MSTRG.160675.17	0.0379313	0.144128	0.0343584	1.5727	up
MSTRG.160675.19	0.201936	0	1.13e-08	-4.68081	down
MSTRG.160711.1	0.0554077	0.138267	0.0298043	1.26868	up
MSTRG.160732.39	0.227936	0.541441	0.0291336	1.24835	up
MSTRG.160734.5	0	0.198332	0.0206006	2.03407	up
MSTRG.16230.2	0	0.0631587	0.00611938	2.42105	up
MSTRG.16366.1	0.186543	0.056147	0.027013	-1.26732	down
MSTRG.16386.18	0	0.230156	0.0445234	1.74547	up
MSTRG.16386.20	0	0.093014	1.66e-12	5.39314	up
MSTRG.16386.8	0.0909583	0.279328	0.0407474	1.44777	up
MSTRG.16386.9	0	0.0592688	0.00691548	2.38551	up
MSTRG.1646.34	5.83333e-05	0.0957127	0.000340799	3.06325	up
MSTRG.1647.1	0.0517883	0.100813	0.012663	1.10847	up
MSTRG.1666.23	0.104978	0.202514	0.0236425	1.07452	up
MSTRG.1666.50	0.20758	0.0248762	0.00463859	-2.0998	down
MSTRG.1669.56	0.005772	0.124495	0.000239044	2.93181	up
MSTRG.1669.60	0.008313	0.127581	0.0495008	1.73495	up
MSTRG.1669.79	0	0.135313	0.0128678	2.19405	up
MSTRG.16885.1	0.465984	0.209952	0.036287	-0.835384	down
MSTRG.16998.34	0	0.0805935	0.00478933	2.49025	up
MSTRG.17002.1	0.0489303	0.183236	0.00262585	1.63872	up
MSTRG.17071.6	0.20862	0.0214128	0.00072737	-2.12647	down
MSTRG.17346.2	0.0963937	0.171749	0.00888176	1.004	up
MSTRG.17448.14	0	0.0928445	0.00509005	2.4726	up
MSTRG.17527.15	0.099037	0	7.51e-07	-4.01341	down
MSTRG.17703.12	0.000641	0.0519635	0.0094244	2.29196	up
MSTRG.17703.6	0.243143	0.0858327	0.04662	-1.10715	down
MSTRG.18025.56	0.484883	0.0684267	0.0120819	-1.93868	down
MSTRG.18056.4	0.00340967	0.212389	0.0118715	2.22224	up
MSTRG.18086.1	0.154012	0.495734	0.00516215	1.60305	up
MSTRG.18231.2	0.177648	0.401983	0.0022769	1.29169	up
MSTRG.18234.1	0.166391	0.0445248	0.00573494	-1.44778	down
MSTRG.18296.2	0.000485667	0.340753	0.00737247	2.36658	up
MSTRG.18312.1	0.0238803	0.312594	0.0166021	2.04622	up
MSTRG.18361.1	0.146271	0.336296	0.0345248	1.19534	up
MSTRG.18390.2	0.0330457	0.473167	0.0120336	2.18387	up
MSTRG.18676.1	0.051145	0.152992	0.0274168	1.45052	up
MSTRG.18728.1	0.311643	0.165669	0.0238116	-0.671086	down
MSTRG.18728.2	0.00391767	0.181028	2.88e-09	3.91266	up
MSTRG.1918.32	2.33333e-05	0.064885	6.2e-07	4.00739	up
MSTRG.20358.22	0	0.378964	4.03e-31	7.95253	up
MSTRG.20693.2	1.06667e-05	0.255713	0.0222268	2.00852	up
MSTRG.21044.22	0	0.18341	0.00697408	2.38301	up
MSTRG.21111.2	0	0.155585	0.00660158	2.39914	up
MSTRG.2116.31	2.73333e-05	0.112629	0.00116686	2.84471	up
MSTRG.21194.2	0	0.344367	0.00785101	2.34771	up
MSTRG.21650.1	0.339016	0.636148	0.0112554	1.05267	up
MSTRG.2173.1	0.0913703	0.205914	0.0112994	1.23719	up
MSTRG.21916.2	0.331988	0.033074	0.0249717	-1.91402	down
MSTRG.21927.56	0.0435497	0.259176	0.000153068	2.3123	up
MSTRG.22803.2	0.204856	0.0701652	0.00855567	-1.27234	down
MSTRG.22904.2	0.208415	0.877675	0.0389129	1.65206	up
MSTRG.23423.39	0.000678333	0.081996	0.0125008	2.20508	up
MSTRG.23423.41	0.380517	3.5e-06	7.15e-22	-6.64212	down
MSTRG.23438.1	0.747696	0.0511692	0.0198777	-2.04877	down
MSTRG.23514.1	0.183406	0.382802	0.0267713	1.12779	up
MSTRG.23972.1	0.548831	0.237918	0.0453891	-0.912709	down
MSTRG.24001.3	0	0.32685	2.23e-07	4.18027	up
MSTRG.24070.2	0	0.0570512	0.00616708	2.41824	up
MSTRG.24262.23	0.000952667	0.148834	0.0043898	2.50717	up
MSTRG.24557.2	0.391436	0	1.19e-14	-5.85432	down
MSTRG.24566.16	0.47566	0.0686772	0.0110684	-1.9567	down
MSTRG.24574.1	0.120457	0.285714	0.0443674	1.14609	up
MSTRG.2462.2	0.031595	0.121499	0.0188846	1.66116	up
MSTRG.24624.1	0.469685	0.132604	0.00846395	-1.37889	down
MSTRG.24661.2	0.338007	0.0473348	0.0251377	-1.79137	down
MSTRG.24790.2	0.574153	0.106179	0.0176411	-1.72783	down
MSTRG.24810.1	0.375649	0.155821	0.0328995	-0.889654	down
MSTRG.25503.4	0	0.255435	0.00409167	2.53582	up
MSTRG.25505.1	0.308409	0.699821	0.0371437	1.20562	up
MSTRG.25509.1	0.0247237	0.137904	0.00235139	1.98066	up
MSTRG.25511.1	0.133029	0.297734	0.0185146	1.23579	up
MSTRG.25681.3	0.060212	0.250879	0.00322573	1.87642	up
MSTRG.25720.1	0.090082	0.15359	0.0432526	0.905965	up
MSTRG.25745.28	0.78268	0.005016	0.000118429	-3.38628	down
MSTRG.26107.1	0.100122	0.253767	0.0388084	1.33313	up
MSTRG.26782.31	0.311338	0.150762	0.0405323	-0.78588	down
MSTRG.26782.44	0.0595053	0.558218	0.0475923	1.74286	up
MSTRG.2680.20	0.206945	0.0248253	0.00788442	-2.04006	down
MSTRG.27094.1	0.512691	1.08809	0.00813474	1.23538	up
MSTRG.27215.93	0	0.220095	2.02e-07	4.23184	up
MSTRG.27258.17	0.138047	0.310704	0.021348	1.2061	up
MSTRG.2732.1	0.996289	1.57986	0.000544625	0.877381	up
MSTRG.2765.3	0	0.0873402	0.0386529	1.80172	up
MSTRG.28186.18	0.2047	0.032176	0.0451781	-1.63404	down
MSTRG.28296.1	0.0395687	0.205867	0.0168489	1.8471	up
MSTRG.29728.1	0.0117847	0.187688	0.000918684	2.66232	up
MSTRG.2984.2	0	0.147302	0.0101117	2.2707	up
MSTRG.30201.1	0.0258897	0.0914882	0.0300429	1.49117	up
MSTRG.30231.1	0.0443373	0.357156	0.0155393	2.01477	up
MSTRG.30231.2	0.0565373	0.329189	0.0258279	1.83851	up
MSTRG.30251.4	1.70803	0.019427	0.000103015	-3.35834	down
MSTRG.3074.36	0.184356	7.65e-05	1.13e-06	-4.09316	down
MSTRG.3076.1	0.343575	0.102755	0.00776655	-1.34736	down
MSTRG.3077.1	0.259855	0.111929	0.0437205	-0.931055	down
MSTRG.3079.1	0.312304	0.13039	0.0411848	-1.00658	down
MSTRG.31063.6	0.00581667	0.0790737	1.22e-05	3.03539	up
MSTRG.31066.1	0.240288	0.394485	0.00223215	0.891211	up
MSTRG.31245.1	0.246829	0.12369	0.0345168	-0.746049	down
MSTRG.31574.1	0.0616003	0.179131	0.00326174	1.51841	up
MSTRG.3204.1	0.177869	0.032025	0.00247682	-1.84752	down
MSTRG.32107.1	0.0388893	0.197416	0.0166723	1.73041	up
MSTRG.32309.1	0.10107	0.166998	0.0466328	0.857436	up
MSTRG.32374.26	0.191255	0.008617	0.0233187	-2.00306	down
MSTRG.32413.1	0.154052	0.0328007	0.0117041	-1.48255	down
MSTRG.32691.1	0.149768	0.014559	0.000592676	-2.41338	down
MSTRG.32758.16	0.0134077	0.247143	0.00471946	2.43117	up
MSTRG.33007.4	0.177218	0.0306567	0.00437014	-1.93061	down
MSTRG.33097.1	0.0660367	0.13776	0.04229	1.10289	up
MSTRG.3331.3	0.093985	0.187116	0.0143688	1.12549	up
MSTRG.3352.3	0.274865	0	4.89e-20	-6.65978	down
MSTRG.33828.1	0.587695	0.150493	0.0135531	-1.51628	down
MSTRG.3398.4	0.653771	0.00699625	1.65e-13	-4.8878	down
MSTRG.34396.1	0.113871	0.259686	0.0434918	1.15369	up
MSTRG.34555.35	0.00693033	0.0685048	0.0281935	1.90269	up
MSTRG.34883.6	0	0.130011	0.0180709	2.07993	up
MSTRG.34887.4	0.101327	0.320612	0.0258401	1.45267	up
MSTRG.34945.2	0.000762	0.074861	0.0130485	2.18825	up
MSTRG.34982.57	0.16104	0.321165	0.0347242	1.06218	up
MSTRG.35016.4	0.056517	0.135387	0.0285524	1.23823	up
MSTRG.35016.56	0.428334	0.0105437	0.0450981	-1.73403	down
MSTRG.35078.1	0.206579	0.863622	1.36e-09	2.16863	up
MSTRG.3531.2	0.430608	0.107214	0.00863901	-1.57693	down
MSTRG.35434.2	0.160988	0.626721	0.00051574	1.89201	up
MSTRG.35541.1	0.235942	0.1116	0.0442361	-0.797999	down
MSTRG.35872.1	0.106263	0.219308	0.0486799	1.04746	up
MSTRG.35971.4	0.77984	1.52158	0.0218206	1.05353	up
MSTRG.36087.27	0.158236	0.00712	0.000382354	-2.91434	down
MSTRG.3639.1	0.0513233	0.185375	0.0029673	1.75217	up
MSTRG.36855.1	0.329167	0.100246	0.0130086	-1.34986	down
MSTRG.38173.2	0	0.168936	0.0121919	2.2103	up
MSTRG.3857.1	0.133311	0.0536893	0.0242231	-0.968034	down
MSTRG.39405.34	0	0.136237	1.03e-21	6.73928	up
MSTRG.39405.36	0	0.144485	1.2e-11	5.30468	up
MSTRG.39405.37	0	0.0583313	2.24e-06	4.01099	up
MSTRG.39405.38	0	0.141143	0.0318809	1.87513	up
MSTRG.39405.39	0	0.131554	0.0190726	2.06131	up
MSTRG.39495.34	0.000203	0.15466	0.0218344	2.01449	up
MSTRG.39640.10	0.292831	0.145644	0.00807726	-0.748329	down
MSTRG.3999.3	0.0622647	0.155041	0.0296746	1.26308	up
MSTRG.40535.1	0.100149	0.299746	0.033713	1.43363	up
MSTRG.41962.1	0.163813	0.00673225	0.0146804	-2.15456	down
MSTRG.41962.15	0.218343	0.052232	0.0265172	-1.46274	down
MSTRG.41962.27	0.18496	0.0507325	0.0355288	-1.34959	down
MSTRG.41962.28	0.0912017	0.0252622	0.00914202	-1.42959	down
MSTRG.4204.26	0.182687	0.037954	0.0440377	-1.53131	down
MSTRG.42092.27	0.261901	0.0805397	0.0472917	-1.294	down
MSTRG.42330.1	0.328959	0.11683	0.0394236	-1.13721	down
MSTRG.42561.1	0.455421	0.119312	0.00955605	-1.44263	down
MSTRG.42575.1	0.168087	0.023016	0.0176284	-1.72865	down
MSTRG.42588.1	0.297654	0.103007	0.00879046	-1.18471	down
MSTRG.42609.43	0.703978	0.061585	0.0291711	-1.89846	down
MSTRG.42991.14	0.100667	0.0068095	0.0453607	-1.76645	down
MSTRG.42991.17	0.00199933	0.161988	0.00902834	2.29585	up
MSTRG.42991.6	0.217052	0.0200997	0.00812858	-2.15919	down
MSTRG.43415.77	0.0669893	0.242334	0.00689749	1.77259	up
MSTRG.43415.82	0.357195	0.528459	0.0110719	0.752762	up
MSTRG.43415.88	0	0.110257	0.00616307	2.41906	up
MSTRG.43606.87	0	0.398704	0.0488334	1.70766	up
MSTRG.43606.88	0	0.325317	0.0381071	1.80671	up
MSTRG.44182.4	0	0.422931	1.83e-09	4.77955	up
MSTRG.44182.5	0	0.161207	1.2e-05	3.69114	up
MSTRG.44182.9	0.0339143	0.555522	0.00136885	2.62835	up
MSTRG.44466.47	0.216509	7.2e-05	5.88e-08	-4.60301	down
MSTRG.44711.23	0.129208	0.036412	0.0438634	-1.32905	down
MSTRG.44753.34	0	0.127994	0.00407158	2.52974	up
MSTRG.44760.1	0	0.122586	0.000128632	3.28446	up
MSTRG.4477.2	0.288241	0.117487	0.0323119	-0.990644	down
MSTRG.44791.14	0.0269133	0.181038	0.021508	1.90134	up
MSTRG.44819.1	0.044294	0.142966	0.00464382	1.515	up
MSTRG.44877.4	0.335717	0.035233	0.0423241	-1.78047	down
MSTRG.45042.4	0.424512	0.100007	0.000878014	-1.71889	down
MSTRG.4508.1	0.016126	0.226994	0.0349773	1.85903	up
MSTRG.4510.1	0.0123687	0.313882	0.00104254	2.78119	up
MSTRG.4512.1	0.026364	0.269232	0.039361	1.80543	up
MSTRG.4513.1	0.0185653	0.248739	0.0195628	2.03882	up
MSTRG.45678.16	0	0.113227	0.0195348	2.05366	up
MSTRG.45745.1	0.208634	0.308	0.0224213	0.75611	up
MSTRG.45782.1	0.0470037	0.122657	0.00884864	1.36291	up
MSTRG.46202.1	0.0787377	0.155408	0.000236619	1.14189	up
MSTRG.46350.1	0.256551	1.03188	0.0023228	1.94366	up
MSTRG.46424.41	0.181207	0.0310682	0.038527	-1.64044	down
MSTRG.46424.46	0.162346	0.27385	0.0428419	0.888801	up
MSTRG.46447.1	0.0377213	0.269807	0.00106872	2.3446	up
MSTRG.46623.1	0.74038	0.413717	0.0435078	-0.601927	down
MSTRG.46625.1	0.065369	0.200334	0.0105177	1.53767	up
MSTRG.46671.5	0.448448	0.00012475	2.32e-07	-4.37252	down
MSTRG.46739.1	0.238729	0.0911867	0.0335006	-1.0536	down
MSTRG.47127.2	0.00439633	0.157327	0.00397869	2.49997	up
MSTRG.48190.1	0.319291	0.0850615	0.0103209	-1.42791	down
MSTRG.48565.6	0.0338523	0.164527	0.0286816	1.69138	up
MSTRG.4890.1	0.114615	0.213242	0.0170142	1.01882	up
MSTRG.48996.1	0.789835	0.3057	0.004766	-1.10344	down
MSTRG.48996.2	0.004874	0.30331	0.00661678	2.39674	up
MSTRG.49074.1	0.0902413	0.229186	0.017492	1.2911	up
MSTRG.49097.2	0.177274	0.013118	0.002081	-2.1708	down
MSTRG.49138.1	0.231371	0.079254	0.0128375	-1.17833	down
MSTRG.49162.2	0	0.094628	7.23e-07	4.05722	up
MSTRG.49260.7	0.306889	0.054036	0.0321044	-1.64515	down
MSTRG.49526.1	0.0223167	0.130496	0.0101582	1.86144	up
MSTRG.49533.1	0.268373	0.430313	0.0127573	0.839011	up
MSTRG.49713.4	0.00621133	0.140236	0.0345094	1.86501	up
MSTRG.49721.1	0.077301	0.26369	0.0466394	1.4779	up
MSTRG.49762.1	0.016315	0.0985083	0.0418173	1.69054	up
MSTRG.49959.35	0.244482	0.405871	0.00109311	0.917021	up
MSTRG.49989.1	0.147775	0.0152357	0.00991769	-1.99865	down
MSTRG.50206.6	0.285188	0.590239	0.0106223	1.15829	up
MSTRG.5023.1	0.034308	0.120542	0.00116537	1.74681	up
MSTRG.50629.1	0.120975	0.296907	0.00311597	1.35913	up
MSTRG.51462.63	0.0146927	0.0606195	0.0442718	1.56974	up
MSTRG.51694.19	0.0301057	0.185199	0.00449584	2.05002	up
MSTRG.5205.2	0.191694	0.005346	0.00779389	-2.34912	down
MSTRG.52178.8	0.00639	0.105836	0.00269073	2.52917	up
MSTRG.5230.44	0.0486293	0.430712	0.00601783	2.25596	up
MSTRG.52378.1	0.349494	0.14457	0.0348562	-0.961106	down
MSTRG.52706.10	0.0952887	0	9.05e-09	-4.80327	down
MSTRG.52706.62	0	0.118835	0.00333425	2.59211	up
MSTRG.52955.5	0	0.234183	0.0426233	1.76249	up
MSTRG.53056.28	0.141171	0	2.92e-10	-5.05131	down
MSTRG.53059.2	0.14521	0.0114285	0.0223094	-1.93062	down
MSTRG.53111.1	0.242717	0.0917788	0.00891599	-1.08385	down
MSTRG.53327.4	0	0.126187	0.0250726	1.96599	up
MSTRG.53370.17	0.00635233	0.126759	0.0103372	2.23958	up
MSTRG.53370.24	0.111103	1.55e-05	3.17e-12	-5.09701	down
MSTRG.53370.28	0.00445267	0.112417	0.00334621	2.49294	up
MSTRG.53370.3	0.25239	0.622272	0.012587	1.33415	up
MSTRG.53379.1	0.0722943	0.257436	0.005256	1.67241	up
MSTRG.53730.3	0.463613	0.126181	0.00123134	-1.47848	down
MSTRG.53880.5	0	0.156771	2.75e-14	5.67802	up
MSTRG.54358.1	0.17018	0.039153	0.0299585	-1.51381	down
MSTRG.54564.1	0.0399137	0.0947805	0.0263618	1.27548	up
MSTRG.54655.11	0.317045	0.66937	0.00218651	1.22945	up
MSTRG.54859.11	0	0.140916	6.29e-08	4.44453	up
MSTRG.54965.1	0.247349	0.0335563	0.00401521	-1.9154	down
MSTRG.55188.1	0	0.10008	0.00690288	2.38607	up
MSTRG.55264.1	0.191731	0.0498865	0.0107078	-1.40803	down
MSTRG.55330.1	0.107317	0.352092	0.0142961	1.5618	up
MSTRG.55338.29	0.265058	0.0129923	0.00377082	-2.46856	down
MSTRG.55338.4	0.0192403	0.181382	0.00387111	2.34399	up
MSTRG.55390.1	0.357675	0.084693	0.000764919	-1.65496	down
MSTRG.55570.5	0	0.12851	0.0190557	2.06091	up
MSTRG.55991.1	0.178296	0.390612	0.00990442	1.21017	up
MSTRG.56028.1	0.392536	0.0915082	0.00886496	-1.51138	down
MSTRG.56209.2	0.29524	0.119092	0.00245469	-1.03116	down
MSTRG.56241.2	0.184695	0.0116892	0.0226098	-1.98362	down
MSTRG.56246.1	0.0120133	0.105941	0.00383179	2.24011	up
MSTRG.56874.4	0	0.145026	0.000199667	3.22353	up
MSTRG.57798.1	0.104295	0.00930325	0.0170064	-1.99549	down
MSTRG.58156.9	0	0.240808	0.0399628	1.78816	up
MSTRG.58271.23	0.241184	0.351459	0.0116517	0.739254	up
MSTRG.58271.8	0.0144213	0.131341	0.0488193	1.72835	up
MSTRG.58299.1	0.111517	0.191287	0.0115557	0.92463	up
MSTRG.58521.4	0.256438	0.09347	0.0315384	-1.11051	down
MSTRG.58521.8	0.0228253	0.082476	0.0279412	1.55398	up
MSTRG.58534.1	0.09313	0.217753	0.0437931	1.22272	up
MSTRG.61113.1	0.0697233	0.28261	0.0185982	1.62888	up
MSTRG.61382.1	0.0868373	0.206209	0.0292857	1.20922	up
MSTRG.61663.2	0.0215673	0.0812477	0.0234462	1.58481	up
MSTRG.62144.8	0	0.146976	1.49e-17	6.3076	up
MSTRG.6244.1	0.116348	0.025765	0.0117458	-1.56139	down
MSTRG.62573.57	0.0224467	0.19964	0.0297325	1.88912	up
MSTRG.62614.1	0.0411697	0.131717	0.0105639	1.61742	up
MSTRG.62628.5	0	0.114859	0.0277178	1.92729	up
MSTRG.62827.87	0.447614	0.0184472	0.0267954	-1.94998	down
MSTRG.63145.7	0.319032	0.0656723	0.00643059	-1.67118	down
MSTRG.6318.4	0	0.0647305	3.42e-08	4.34681	up
MSTRG.6319.3	0.0501317	0.127536	0.0385954	1.3709	up
MSTRG.63244.2	0.208123	0.0243942	0.020908	-1.93206	down
MSTRG.63351.21	0.00389567	0.126076	0.00065519	2.86575	up
MSTRG.63423.16	0	0.271998	0.0316073	1.87837	up
MSTRG.6345.16	0.0658753	0.250838	0.0071802	1.7699	up
MSTRG.635.1	0.119657	0.0417175	0.0245871	-1.14988	down
MSTRG.64163.33	0.193454	0.0265225	0.0481237	-1.70325	down
MSTRG.64271.1	0.233654	0.060182	0.00532612	-1.48408	down
MSTRG.64318.1	0.137399	0.300809	0.031143	1.15861	up
MSTRG.64322.1	0.0416743	0.211029	0.0146249	1.74081	up
MSTRG.64343.1	0.088539	0.219205	0.031814	1.29645	up
MSTRG.64574.1	0.108833	0.194726	0.0168485	0.966826	up
MSTRG.64799.1	1.37185	0.699184	0.0398838	-0.72907	down
MSTRG.65153.3	0	0.306034	0.0308744	1.88756	up
MSTRG.65396.1	0.204821	0.047472	0.00250192	-1.65988	down
MSTRG.65397.4	0.165498	0.010405	0.00785946	-2.28713	down
MSTRG.65404.1	0.271496	0.0741248	0.0125073	-1.39823	down
MSTRG.65445.2	0.00226533	0.255822	5.58e-05	3.45113	up
MSTRG.65455.1	0.089608	0.161004	0.0495228	0.936023	up
MSTRG.65651.1	0.099187	0.152814	0.00354808	0.842479	up
MSTRG.661.1	0.23798	0.34371	0.0139395	0.721292	up
MSTRG.6648.1	0.0529723	0.131193	0.0387998	1.3179	up
MSTRG.66909.86	1.43714	0.363797	0.00234151	-1.57763	down
MSTRG.67001.10	0.009064	0.235985	0.0439549	1.77623	up
MSTRG.67054.2	0	0.171064	0.0252097	1.96201	up
MSTRG.67187.23	0.00293233	0.136059	0.00549533	2.44104	up
MSTRG.67214.1	0.261055	0.0765688	0.0225852	-1.35382	down
MSTRG.67440.14	0.159565	0.0195515	0.0480621	-1.70122	down
MSTRG.67662.1	0.280599	0.0748702	0.0186953	-1.27529	down
MSTRG.67879.7	0.275085	0.11027	0.0453086	-0.982646	down
MSTRG.68019.2	0.0797117	0.195227	0.0237733	1.27961	up
MSTRG.68052.50	0.303426	0	7.35e-16	-6.37589	down
MSTRG.693.1	0.034832	0.179508	0.00633105	1.91108	up
MSTRG.70093.13	0.000373	0.222458	0.00736982	2.36662	up
MSTRG.70635.2	0.223466	0	6.21e-08	-4.39717	down
MSTRG.71293.1	0.244834	0.0444613	0.0476492	-1.51336	down
MSTRG.71565.1	0.186744	0.388318	0.0157526	1.17816	up
MSTRG.71878.8	0.288643	0.0108625	0.0158843	-2.12921	down
MSTRG.71929.1	0.156094	0.0720927	0.00972987	-0.859942	down
MSTRG.72835.1	0.255803	0.339237	0.0438375	0.621701	up
MSTRG.73100.1	0.192496	0.0531148	0.0157465	-1.4284	down
MSTRG.73320.4	0.222361	0.389603	0.00314437	1.00568	up
MSTRG.73322.1	0.078642	0.192477	0.0165225	1.31263	up
MSTRG.73351.1	0.0550317	0.201794	0.000519332	1.80934	up
MSTRG.73505.4	0.0231727	0.184453	0.0349639	1.79071	up
MSTRG.73820.2	0.379324	0.724901	0.000980629	1.12696	up
MSTRG.73888.58	0.016828	0.13986	0.0120582	2.05988	up
MSTRG.73954.1	0	0.141016	0.012148	2.21334	up
MSTRG.74128.5	0.099495	0.165041	0.0139328	0.878864	up
MSTRG.74616.3	0	0.166385	0.0142716	2.16129	up
MSTRG.7510.4	0.005051	0.209839	0.000197046	3.05289	up
MSTRG.75297.53	0	0.105963	1.04e-06	4.08021	up
MSTRG.75297.61	0	0.137431	0.0148884	2.14468	up
MSTRG.75297.64	0.0288027	0.117337	0.0319506	1.60208	up
MSTRG.75345.1	0.0154017	0.0984725	0.0375591	1.73372	up
MSTRG.75386.30	0.673752	0.033859	0.00126855	-2.71357	down
MSTRG.76292.11	0	3.13512	2.37e-14	5.93328	up
MSTRG.76299.1	0.0890707	0.169665	0.0262719	1.02762	up
MSTRG.7630.9	0.113302	0.0522953	0.00454984	-0.869088	down
MSTRG.76805.11	0.0614503	0.305554	0.0475555	1.65225	up
MSTRG.76934.1	0.0601263	0.342204	0.0429486	1.68686	up
MSTRG.77098.1	0.128652	0.313001	0.0065639	1.33244	up
MSTRG.77156.1	0.097397	0.240724	0.0431699	1.22355	up
MSTRG.77691.1	0.252419	0.05903	0.0292678	-1.4885	down
MSTRG.77850.13	0.0220937	0.334855	0.00160407	2.61676	up
MSTRG.77850.9	0.001356	0.19429	0.0218535	2.0175	up
MSTRG.77999.2	0	0.206257	0.00705173	2.37983	up
MSTRG.78165.1	0.4561	0.235865	0.0233972	-0.694997	down
MSTRG.79306.1	0	0.11547	0.00691086	2.38271	up
MSTRG.7970.2	0.0900967	0.183501	0.0337605	1.1096	up
MSTRG.79999.2	0.0715523	0.213268	0.00171589	1.55838	up
MSTRG.80324.1	0.160746	0.0114038	0.02648	-1.93089	down
MSTRG.8046.2	0.112404	0.025897	0.00820312	-1.6145	down
MSTRG.80486.31	0.506054	0.112215	0.0169854	-1.65903	down
MSTRG.80578.5	0.00631733	0.329239	4.89e-06	3.61052	up
MSTRG.81053.8	1.48821	0.0267333	0.0019846	-2.72425	down
MSTRG.81317.4	0.195141	0.0746762	0.0147929	-1.0615	down
MSTRG.81669.45	0	0.166273	0.000424295	3.09237	up
MSTRG.81672.2	0.169606	0.00412	3.96e-05	-3.35769	down
MSTRG.81687.3	0.298662	0.135222	0.00583162	-0.887623	down
MSTRG.81727.1	0.214512	0.0931022	0.0124915	-0.949906	down
MSTRG.81783.1	0.166442	0.0622785	0.019845	-1.05788	down
MSTRG.81801.1	0.153213	0.0371973	0.0351489	-1.42879	down
MSTRG.82043.2	0	0.109334	0.0230607	1.99564	up
MSTRG.82377.1	0.20281	0.43021	0.0483447	1.12551	up
MSTRG.82779.33	0.102824	0.245474	0.0101534	1.33032	up
MSTRG.82817.1	0.147171	0.0254697	0.00621531	-1.75038	down
MSTRG.8336.10	0.408152	0.0380072	0.0220799	-1.97094	down
MSTRG.83462.1	0.249495	0.0100325	0.000105395	-3.02029	down
MSTRG.83488.1	0.0483153	0.18976	0.0439459	1.50804	up
MSTRG.83678.1	0.206874	0.368073	0.0265011	1.00172	up
MSTRG.83834.1	0.3443	0.109423	0.00198055	-1.32693	down
MSTRG.83834.25	0.366528	0.168897	0.0384368	-0.814748	down
MSTRG.83834.8	0.0335737	0.185748	0.0100261	1.97425	up
MSTRG.84049.1	0.154614	0.036575	0.00828481	-1.55013	down
MSTRG.84232.9	0	0.234719	0.0084109	2.3271	up
MSTRG.8426.32	0.0587797	0.0082515	0.0159075	-1.88776	down
MSTRG.8426.39	0.0726023	0.121649	0.0425635	0.905571	up
MSTRG.84442.19	0.2034	0.0281918	0.0201387	-1.87956	down
MSTRG.84442.26	0.0130847	0.187152	0.0415922	1.79894	up
MSTRG.84540.2	0	0.123749	0.0117978	2.22069	up
MSTRG.84552.20	0.00647267	0.248459	0.00303582	2.58697	up
MSTRG.84556.1	0.0525193	0.128218	0.0310122	1.27088	up
MSTRG.84605.40	0.0256227	0.250422	0.00442571	2.2901	up
MSTRG.84705.1	0.346887	0.80212	0.0218273	1.30585	up
MSTRG.85203.1	0.0677567	0.132552	0.0433066	1.0452	up
MSTRG.85382.1	0.0120113	0.112727	0.0112471	2.09531	up
MSTRG.85428.1	0.0930737	0.228012	0.0273597	1.28564	up
MSTRG.86190.2	0.180243	0.552906	0.0101135	1.59511	up
MSTRG.86190.3	0.376996	0.0208935	0.00631957	-2.3563	down
MSTRG.86282.1	0.087789	0.16255	0.0417287	0.9853	up
MSTRG.86315.2	0.198748	0.320488	0.0176789	0.846836	up
MSTRG.86579.12	0.100095	0.00321925	0.00347087	-2.56544	down
MSTRG.86635.4	0.049801	0.217892	0.00479929	1.87265	up
MSTRG.86701.2	0.41732	0.004482	1.64e-15	-5.17456	down
MSTRG.8693.24	0	0.086914	0.00465385	2.49908	up
MSTRG.86948.2	0	0.182944	2.01e-17	6.11913	up
MSTRG.87297.1	0.050669	0.0963955	0.00905675	1.06347	up
MSTRG.87506.31	0.448381	0.766899	0.0492778	0.925037	up
MSTRG.88212.1	0.058617	0.208615	9.83e-05	1.85836	up
MSTRG.88755.2	0.122938	0.514509	5.11e-07	2.16542	up
MSTRG.88818.1	0.133532	0.0555585	0.0413884	-0.90446	down
MSTRG.88959.2	0.174196	0.0138808	0.0108494	-2.15873	down
MSTRG.89544.57	0.0809933	0.213438	0.0151835	1.43992	up
MSTRG.89544.59	0.91291	0	1.93e-21	-7.24037	down
MSTRG.89858.43	0.000123667	0.030253	0.0198348	2.05041	up
MSTRG.89989.63	0.341612	0.0539868	0.0192512	-1.77388	down
MSTRG.90820.10	0.111962	0.00560775	0.0343872	-1.86798	down
MSTRG.91046.28	0.000271667	0.261124	3.88e-12	5.49778	up
MSTRG.91046.30	0.462648	0.0149005	0.0310254	-1.88948	down
MSTRG.92172.1	0	0.142516	0.0127626	2.1964	up
MSTRG.92556.2	0.0185963	0.264132	0.000534197	2.65727	up
MSTRG.92558.5	0	0.188079	0.00203434	2.72206	up
MSTRG.92989.44	0	0.106046	0.00569127	2.44225	up
MSTRG.93008.10	0.292065	0.112819	0.0320833	-1.0357	down
MSTRG.93263.4	0.257527	0.665543	0.0284636	1.31762	up
MSTRG.93386.4	0.238164	0.405948	0.0013123	0.954612	up
MSTRG.93939.1	0.0784963	0.145902	0.0256675	1.01694	up
MSTRG.93947.1	0.241654	0.917817	0.0458296	1.52397	up
MSTRG.94204.3	0.000631	0.397347	0.016812	2.10929	up
MSTRG.94558.3	0.29452	0.0157935	0.00412942	-2.44529	down
MSTRG.94558.4	0.24618	0.0130968	3.83e-05	-3.04627	down
MSTRG.94558.6	0.290509	0.0331258	0.0229443	-1.87544	down
MSTRG.94794.1	0.021268	0.0882763	0.0057317	1.72917	up
MSTRG.94981.1	0.176461	0.081259	0.0463142	-0.811368	down
MSTRG.95166.2	0.0787957	0.21026	0.0346944	1.29492	up
MSTRG.95218.1	0.13342	0.204408	0.0289203	0.794311	up
MSTRG.95357.60	0.337876	0.0990577	0.0216308	-1.39852	down
MSTRG.95712.15	0.134284	0.270394	0.0321422	1.10128	up
MSTRG.95728.111	0	0.0844667	0.023801	1.98386	up
MSTRG.95728.116	0.0777797	0.00015775	3.09e-08	-4.45615	down
MSTRG.95728.48	0.0970873	0	1.02e-17	-6.28649	down
MSTRG.95728.65	0.126653	0.00728225	0.0486069	-1.73622	down
MSTRG.95734.1	0.046808	0.115987	0.0354902	1.20737	up
MSTRG.95748.3	0.0955267	0.14084	0.0154089	0.737952	up
MSTRG.95900.1	0.271327	0.115568	0.0294029	-0.971274	down
MSTRG.96454.3	0.176558	0	5.57e-12	-5.32961	down
MSTRG.9710.2	0.0776873	0.0123842	0.00955404	-1.89779	down
MSTRG.9710.3	0.040952	0.138407	0.0185797	1.57394	up
MSTRG.97480.11	0.0147937	0.127736	0.0205258	1.94741	up
MSTRG.97521.2	0	0.187201	0.00807924	2.33892	up
MSTRG.97954.1	0.007666	0.388794	0.0156672	2.13324	up
MSTRG.97954.9	0.0861563	0.355973	0.0476941	1.5655	up
MSTRG.98230.2	0.0172337	0.110776	0.0342893	1.76014	up
MSTRG.98287.3	0.0542693	0.11765	0.0493779	1.1812	up
MSTRG.98291.5	0	0.134585	0.000187647	3.25763	up
MSTRG.98310.1	0.081481	0.184238	0.00208993	1.28819	up
MSTRG.9832.1	0.137018	0.252026	0.0352466	1.01798	up
MSTRG.98418.1	1.5537	4.20479	0.00212178	1.52308	up
MSTRG.9896.5	0.105822	0.456442	0.00350032	1.90962	up
MSTRG.99126.8	0.333823	1.13149	0.0327153	1.52584	up
MSTRG.99152.22	0.087402	0.248254	0.0150685	1.43875	up
MSTRG.99155.1	0.240938	0.125177	0.0391901	-0.680716	down
MSTRG.99190.1	0.0964537	0.376927	0.04523	1.59096	up
MSTRG.99310.35	0.066151	0.163666	0.0225122	1.31467	up
MSTRG.99904.20	0.00207233	0.0757947	0.00116816	2.79257	up

## Sheet: Supplementary Table S2d
Table S2d Significanly differential expressed genes between uninfected and tolerable birds
Gene	N_FPKM	T_FPKM	Pvalue	log2FC	Direction
AGBL1	4.55826	2.24594	0.00465029	-0.71961	down
AMT	4.05802	2.09004	0.00923137	-0.635735	down
ANGPT1	2.18196	1.11502	0.0176244	-0.632345	down
ANGPT4	2.33158	1.3723	4.34e-05	-0.747777	down
CCDC181	2.59095	0.759857	0.00109892	-0.871314	down
CUNH1orf74	20.3757	9.69817	0.0129077	-0.644495	down
DAPL1	2.30732	0.685698	0.0180694	-0.611502	down
DFFA	17.1847	10.0161	0.0110162	-0.610268	down
DGKK	2.0403	0.904401	0.0194151	-0.612837	down
DNASE1L3	4.7574	2.443	0.0200231	-0.588797	down
DUSP28	0.98376	0.280026	0.0115255	-0.617685	down
LOC102084847	13.9163	5.41111	0.0104003	-0.686743	down
LOC102084875	8.46301	2.25606	0.00161758	-0.793046	down
LOC102087220	0.455495	0.093248	0.000126059	-1.01643	down
LOC102087368	12.6802	4.57873	0.000498842	-0.86599	down
LOC102089266	1.49773	0.125047	0.000387776	-0.884369	down
LOC102090444	9.20188	2.25889	0.00158956	-0.841136	down
LOC102091110	2.76168	1.48934	0.000622015	-0.752644	down
LOC102093616	1.63569	0.855408	0.00132307	-0.742556	down
LOC102096675	1.35572	0.462208	0.0033359	-0.787269	down
LOC102098806	0.645172	0.164247	1.1e-10	-1.6257	down
LOC106146053	1.25035	0.524768	0.0219447	-0.610294	down
LOC110357300	0.878727	0.323151	0.00762467	-0.703293	down
LOC110363298	0.847885	0.398078	0.00490629	-0.733428	down
LRRC28	4.97725	3.19009	0.0166293	-0.585196	down
MAML1	2.79301	1.40458	2.91e-05	-0.80229	down
MCOLN3	0.834832	0.300612	0.00137756	-0.843756	down
NECAB3	0.520476	0.202115	0.0104411	-0.68529	down
NUPL2	3.81408	1.94012	0.00173535	-0.683571	down
OSR2	8.32156	4.34593	0.0105762	-0.673746	down
PHACTR4	30.5614	9.45287	0.0192576	-0.588041	down
PRKG2	0.990368	0.419336	0.0199885	-0.624132	down
PYGO1	1.42998	0.700788	0.0257325	-0.588915	down
RGS11	1.17397	0.569211	0.00679	-0.679677	down
SCNN1D	1.19136	0.429133	0.0223844	-0.590429	down
SGSM1	2.16742	1.17169	2.58e-05	-0.619746	down
SLC35F2	1.17555	0.614359	0.000253041	-0.705325	down
SNAP91	0.629953	0.152288	0.0148492	-0.647617	down
SULT4A1	1.42843	1.07243	0.0104636	-0.638731	down
TAF1D	11.9708	6.12223	0.0063712	-0.636529	down
TG	4.38425	0.75892	0.00780831	-0.647043	down
TMEM110	3.25145	2.08837	0.00721139	-0.624849	down
TMEM26	0.953403	0.32524	0.0224488	-0.607009	down
TMEM71	0.690951	0.253496	0.00304214	-0.701151	down
TRPM6	0.133583	0.0539717	0.0259799	-0.596763	down
USH1C	0.709497	0.239759	0.00229985	-0.805967	down
ZCCHC10	1.62831	1.05474	0.00828475	-0.607348	down
Columba_livia_newGene_1841	2.89974	1.54388	0.0134001	-0.641244	down
Columba_livia_newGene_5204	0.725739	0.314366	0.0243894	-0.602918	down
Columba_livia_newGene_6572	0.651894	0.365772	0.00212529	-0.69692	down
Columba_livia_newGene_7462	4.66786	2.24857	0.00687474	-0.686514	down
Columba_livia_newGene_11828	2.01331	0.746506	0.0121202	-0.639244	down
Columba_livia_newGene_12685	1.38905	0.814748	0.00175786	-0.783258	down
Columba_livia_newGene_14909	3.23686	0.903571	7.37e-09	-1.48395	down
Columba_livia_newGene_23303	4.41889	2.15974	0.0236751	-0.59682	down
Columba_livia_newGene_23407	1.44028	0.77045	0.00961931	-0.665079	down
Columba_livia_newGene_28681	2.53608	1.41866	0.00329514	-0.638153	down
Columba_livia_newGene_31706	0.196706	0.093195	0.0196342	-0.612578	down
Columba_livia_newGene_32902	1.16365	0.403939	0.00383154	-0.775808	down
Columba_livia_newGene_33553	2.76801	1.94116	0.00197938	-0.601546	down
Columba_livia_newGene_33783	1.63855	0.615754	0.0164157	-0.633106	down
Columba_livia_newGene_35242	4.80053	2.07116	0.0244442	-0.602565	down
Columba_livia_newGene_47095	0.660604	0.355789	0.0123814	-0.636327	down
Columba_livia_newGene_48019	1.56607	0.69545	0.00236838	-0.633233	down
Columba_livia_newGene_49495	1.16139	0.425795	0.00427422	-0.766092	down
Columba_livia_newGene_56139	0.991097	0.332107	0.00757384	-0.715013	down
Columba_livia_newGene_57840	1.13137	0.744822	0.0141231	-0.652163	down
Columba_livia_newGene_64121	1.06316	0.449852	0.0227935	-0.591142	down
Columba_livia_newGene_64691	0.459465	0.142896	0.00953056	-0.668978	down
Columba_livia_newGene_71999	0.223517	0.0895115	0.0271759	-0.592004	down
Columba_livia_newGene_75532	2.1192	0	5.43e-17	-2.20116	down
Columba_livia_newGene_78293	6.58345	2.87782	2.97e-06	-0.92685	down
Columba_livia_newGene_78295	3.21706	2.04222	0.00147073	-0.816012	down
Columba_livia_newGene_83956	1.45038	0.671461	0.0224257	-0.610862	down
Columba_livia_newGene_86046	0.766027	0.328227	0.0028118	-0.739474	down
Columba_livia_newGene_86145	0.89197	0.206806	0.00287028	-0.773094	down
ACAD9	28.2588	39.9532	9.93e-05	0.602333	up
ADORA2A	0.689273	1.13093	0.00139893	0.721521	up
ADPRM	0.893256	1.68014	0.0189164	0.622532	up
ARMC10	2.51667	4.50356	7.54e-08	0.728986	up
ATIC	4.0565	7.27525	0.0121023	0.651519	up
BLCAP	4.4632	10.5874	0.00100494	0.872248	up
C3	3.76029	10.3155	0.00664527	0.727569	up
C7	2.52206	10.2198	0.00333339	0.780639	up
CLU	37.2123	88.6905	0.0134045	0.646092	up
COMP	35.5333	80.1866	0.000246275	0.880506	up
CRISPLD2	26.8023	47.9853	0.00457389	0.668926	up
DCK	2.07723	5.16697	0.0217579	0.61272	up
ELP6	1.83628	3.74702	0.00101579	0.743307	up
FGG	0.441895	5.26531	0.000520088	0.85729	up
GPR1	1.39641	3.10184	0.0133185	0.661783	up
GPRC5B	5.41418	9.11803	0.0119971	0.596001	up
GTPBP10	3.39038	4.61232	5.91e-05	0.809038	up
GZF1	0.424098	1.26004	0.00434882	0.759327	up
HAO1	0.579632	2.56685	0.0012013	0.868398	up
HSF2BP	0.887089	1.97025	0.0245123	0.6032	up
HSPH1	4.65691	14.8267	0.000313934	0.952702	up
ITIH2	0.147933	4.79518	0.00536461	0.606774	up
LOC102084454	0.621643	1.47165	0.000633485	0.858063	up
LOC102084914	0.142206	0.747949	0.00401634	0.685925	up
LOC102086527	8.01247	19.2448	0.00205719	0.796448	up
LOC102088006	1.1479	2.34654	0.0114774	0.659571	up
LOC102088960	2.11093	5.52676	0.000627017	0.89303	up
LOC102089105	22.6769	66.9401	5.55e-05	1.03405	up
LOC102089597	13.49	27.0676	0.0233448	0.603681	up
LOC102091695	0.541643	2.04069	0.00128437	0.85974	up
LOC102092663	8.64245	14.39	0.000685776	0.695829	up
LOC102097290	4.69595	4.86104	0.00739401	0.659279	up
LOC110355493	0.774979	1.3596	0.0185943	0.60468	up
LOC110356702	2.13419	7.94136	0.0129015	0.64086	up
LOC110361972	0	0.418724	6.67e-12	1.82452	up
LYSMD4	0.193558	1.22459	0.00295671	0.752808	up
MATN3	4.08258	11.7794	0.0100097	0.684645	up
MFSD4B	2.74468	6.15436	0.0091125	0.698208	up
NAMPT	7.67017	16.3188	0.00226213	0.79275	up
NFIL3	4.88519	10.0038	0.00805076	0.676549	up
NUDCD3	7.54736	11.956	0.00267153	0.624398	up
OAT	17.6862	31.4321	0.00488384	0.632699	up
OIT3	1.0703	2.54058	0.00106486	0.777098	up
OTUD1	13.8815	25.8215	0.0110348	0.640488	up
PAIP2B	3.33716	6.59164	0.00683383	0.695935	up
PGPEP1L	0.247595	0.814225	0.00444378	0.763167	up
PRG4	1.16528	7.12269	0.00158514	0.80874	up
PRSS35	0.0530077	0.172534	0.00977457	0.684379	up
RCAN3	2.97915	5.13407	0.0161426	0.590296	up
RETREG1	11.5909	23.7997	0.019065	0.627721	up
SERINC5	2.38719	12.3088	1.12e-20	1.72998	up
SFT2D2	1.36587	5.29278	2.24e-07	1.28303	up
SLC19A2	2.18957	4.11917	0.00453313	0.685487	up
SMAD4	3.82006	6.89481	3.49e-05	0.823382	up
SOD3	12.4865	25.8731	0.0206874	0.617146	up
TMEM184C	1.89733	3.44466	0.000954518	0.704752	up
TRMT10C	0	2.59795	3.35e-05	1.0054	up
TXLNB	6.03153	10.006	0.00127758	0.659757	up
UGP2	135.212	233.921	0.00272565	0.66663	up
WWTR1	6.32948	12.2892	0.0273258	0.587011	up
ZMAT3	1.25366	1.45339	0.00755389	0.586861	up
Columba_livia_newGene_2025	0.431389	2.19468	0.012751	0.623269	up
Columba_livia_newGene_12962	0.106681	0.197188	0.00385113	0.697645	up
Columba_livia_newGene_14905	0.561182	1.18596	0.0257869	0.592751	up
Columba_livia_newGene_18049	0.210747	0.367359	0.0167204	0.641923	up
Columba_livia_newGene_25824	0.19639	0.423183	0.0166123	0.641811	up
Columba_livia_newGene_31710	0.0937303	3.71786	0.000827368	0.781783	up
Columba_livia_newGene_33639	0.234579	3.00061	0.000399649	0.883159	up
Columba_livia_newGene_39315	11.3897	30.6004	4.46e-05	1.01356	up
Columba_livia_newGene_43539	0	0.378964	3.95e-20	2.46545	up
Columba_livia_newGene_44380	0.76305	1.74094	0.0174867	0.623768	up
Columba_livia_newGene_46297	0.0144203	0.537608	0.00412324	0.63175	up
Columba_livia_newGene_46620	1.19262	2.12976	0.00550331	0.660869	up
Columba_livia_newGene_51430	0.741417	2.56829	0.00338657	0.772301	up
Columba_livia_newGene_52773	0.194966	0.340686	0.00237776	0.723652	up
Columba_livia_newGene_58306	0.272396	2.03837	6.95e-05	1.03843	up
Columba_livia_newGene_58758	0.651442	0.528555	0.0193928	0.619818	up
Columba_livia_newGene_59569	0.256551	1.03188	0.00582096	0.714712	up
Columba_livia_newGene_79021	0.121445	3.23762	0.00143398	0.807174	up
Columba_livia_newGene_79516	0.629312	2.21872	0.00945342	0.672096	up
Columba_livia_newGene_93396	1.5537	4.20479	0.00135399	0.848649	up

## Sheet: Supplementary Table S2e
Table S2e Significanly differential expressed lncRNAs between uninfected and susceptible birds
LncRNA transcript	N_FPKM	S_FPKM	Pvalue	log2FC	Direction
MSTRG.100021.1	0.171574	0.0415343	0.0071267	-1.59031	down
MSTRG.100125.1	0.297357	0.141161	0.0398041	-0.827008	down
MSTRG.100603.49	0.393845	0.0744333	0.0390883	-1.60598	down
MSTRG.101075.1	0.284368	0.0032475	0.00016448	-3.27943	down
MSTRG.101075.7	1.55458	0.418	0.0031271	-1.50522	down
MSTRG.101075.8	2.22121	0.683985	0.0177409	-1.33151	down
MSTRG.101271.1	0.303586	0.0611925	0.000972516	-1.88438	down
MSTRG.101322.1	0.177389	0.028138	0.0158534	-1.61983	down
MSTRG.101373.1	0.438051	0.0711375	0.00393892	-1.94455	down
MSTRG.101528.1	0.267554	0.0665145	0.00241706	-1.54173	down
MSTRG.101764.1	0.187664	0.0555093	0.0205965	-1.34144	down
MSTRG.101801.1	0.218682	0.0744925	0.00185772	-1.22563	down
MSTRG.102284.1	0.134366	0.0401277	0.0224916	-1.30253	down
MSTRG.102433.2	0.242443	0	4.79e-09	-4.58078	down
MSTRG.102499.2	0.210209	0.043029	0.0230929	-1.60525	down
MSTRG.103037.1	0.230621	0.0698162	0.0242509	-1.32378	down
MSTRG.10446.1	0.335066	0.008374	2.48e-05	-3.31419	down
MSTRG.10446.2	0.188918	0.0186433	0.0246664	-1.90384	down
MSTRG.105256.123	0.113377	0.0271575	0.0423287	-1.43082	down
MSTRG.105256.45	0.616586	1.5e-06	0.00428662	-2.48638	down
MSTRG.105256.66	0.15265	0.0167105	0.0457522	-1.74482	down
MSTRG.105274.1	0.236678	0.125807	0.0487643	-0.690643	down
MSTRG.105780.1	0.337012	0.123548	0.01761	-1.0802	down
MSTRG.106021.2	0.196648	0.0324438	0.0408354	-1.64939	down
MSTRG.106506.1	0.197416	0.0466005	0.00826297	-1.5629	down
MSTRG.107262.2	0.181033	0.0339277	0.00633165	-1.72578	down
MSTRG.108069.1	0.489407	0.0598368	0.012993	-1.99114	down
MSTRG.108238.1	0.216019	0.0774072	6.05e-07	-1.24416	down
MSTRG.108247.1	0.243182	0.127311	0.033209	-0.686101	down
MSTRG.108969.1	0.225687	0.0673347	0.0100825	-1.39367	down
MSTRG.109084.1	0.116191	0.0476347	0.0352874	-0.950348	down
MSTRG.109100.3	0.124621	0.00803475	0.0470795	-1.74809	down
MSTRG.109143.1	0.267428	0.0552638	0.0482605	-1.51753	down
MSTRG.109336.2	0.34227	0.0184248	0.00187885	-2.6165	down
MSTRG.109646.2	0.148907	0.020858	0.0232163	-1.79624	down
MSTRG.109686.1	0.138	0.0388278	0.00702195	-1.42652	down
MSTRG.109707.1	0.405263	0.139009	0.041952	-1.1063	down
MSTRG.110227.2	0.176306	0.0156183	0.0109931	-2.12238	down
MSTRG.110539.4	0.469358	0.16082	0.000225883	-1.288	down
MSTRG.110646.1	0.323999	0.0260778	0.00297008	-2.30149	down
MSTRG.111395.1	0.137504	0.017383	0.0233947	-1.80781	down
MSTRG.112035.29	0.684293	0.207496	0.000983067	-1.41581	down
MSTRG.112615.26	0.356933	0.109311	0.0469668	-1.24759	down
MSTRG.113663.11	0.137048	0.00375875	0.0185542	-2.06407	down
MSTRG.114342.3	0.149993	0.0358948	0.0474974	-1.40788	down
MSTRG.114445.45	0.124849	0.026392	0.040982	-1.54356	down
MSTRG.114543.1	0.211471	0.0526862	0.0375405	-1.39098	down
MSTRG.114544.1	0.398971	0.104811	0.0295745	-1.33604	down
MSTRG.114766.1	0.215702	0.0317243	0.00468389	-1.93885	down
MSTRG.114849.42	0.211417	0.00043225	1.12e-06	-4.12816	down
MSTRG.114923.1	0.355159	0.0551193	0.00889211	-1.92928	down
MSTRG.114930.1	0.410271	0.125713	0.0466099	-1.21951	down
MSTRG.115236.2	0.407979	0.064605	0.0381487	-1.64295	down
MSTRG.115537.2	0.215178	0.045001	0.0273711	-1.54952	down
MSTRG.115562.1	0.229096	0.109637	0.00755848	-0.819648	down
MSTRG.115571.3	0.15786	0.0222575	0.0449864	-1.68318	down
MSTRG.115945.52	0.792291	0.0438658	0.000548176	-2.76999	down
MSTRG.116018.1	0.18732	0.0621585	0.0049204	-1.23203	down
MSTRG.116136.52	1.03297	0.589774	0.0146219	-0.600836	down
MSTRG.116345.11	0.153891	0	8.54e-09	-4.70239	down
MSTRG.116433.17	0.216458	0	4.96e-10	-4.96608	down
MSTRG.116812.25	0.493024	0.158023	0.0402208	-1.21376	down
MSTRG.118204.1	0.694564	0.338525	0.0298406	-0.787059	down
MSTRG.118226.1	0.391648	0.117395	0.000444759	-1.38734	down
MSTRG.118365.1	0.208285	0.0778092	0.0454624	-1.0528	down
MSTRG.11880.1	0.194892	0.095994	0.00439237	-0.785839	down
MSTRG.119139.1	0.388365	0.0487153	0.0138355	-1.93943	down
MSTRG.11998.13	0.578956	0.149817	0.0164609	-1.48215	down
MSTRG.119997.1	0.174979	0.0619483	0.0357196	-1.14346	down
MSTRG.120012.1	0.202077	0.0901465	0.004953	-0.921818	down
MSTRG.120038.1	0.158057	0.05499	0.0173361	-1.15745	down
MSTRG.120158.1	0.178218	0.0307383	0.0174852	-1.69169	down
MSTRG.121917.1	0.212252	0.0560185	0.0129355	-1.47782	down
MSTRG.123311.1	0.226935	0.102084	0.0208682	-0.910451	down
MSTRG.123708.1	0.296801	0.100821	6.91e-05	-1.304	down
MSTRG.125629.5	0.194379	0.004871	0.000933651	-2.85561	down
MSTRG.125734.1	0.181324	0.0638192	0.0050717	-1.21844	down
MSTRG.126306.1	0.326691	0.0863047	0.0249951	-1.34825	down
MSTRG.126311.1	0.900237	0.337753	0.0349907	-1.04717	down
MSTRG.126330.3	0.4249	0.089059	0.0014358	-1.72214	down
MSTRG.127144.1	0.315619	0.0953865	0.0192929	-1.2306	down
MSTRG.127639.27	0.31058	0.08421	0.0137687	-1.47755	down
MSTRG.130197.1	0.160216	0.0069335	0.0167319	-2.10338	down
MSTRG.130567.2	0.142866	0.0161207	0.0216918	-1.91309	down
MSTRG.130679.3	0.194606	0.006748	0.00968812	-2.27654	down
MSTRG.130771.2	0.295345	0.0130563	0.0191906	-2.05865	down
MSTRG.130997.1	0.345667	0.172283	0.0406772	-0.774087	down
MSTRG.131825.13	0.0814937	0.011607	0.00857303	-2.00041	down
MSTRG.132308.2	0.173329	0.053704	0.0125951	-1.30188	down
MSTRG.132865.10	0.618265	0.0496743	0.0416381	-1.7879	down
MSTRG.133135.11	0.263803	0.0234183	0.0233183	-1.95323	down
MSTRG.133456.1	0.178291	0.0306967	0.0321953	-1.62902	down
MSTRG.133762.1	0.163726	0.0602227	0.0434941	-1.06863	down
MSTRG.134683.2	0.0954507	0.00238125	1.84e-06	-3.63289	down
MSTRG.135397.27	0.44295	0.0131045	0.00352753	-2.55564	down
MSTRG.136008.11	0.0772803	0.004894	0.00518001	-2.3532	down
MSTRG.136824.1	0.574645	0.320464	0.0144938	-0.628142	down
MSTRG.137465.11	1.76496	0.42864	0.0260002	-1.49937	down
MSTRG.137500.1	0.604611	0.0863353	0.0145024	-1.82326	down
MSTRG.137656.1	0.178702	0.0335385	0.0228152	-1.57559	down
MSTRG.137889.2	0.878549	0.280717	0.048257	-1.24897	down
MSTRG.138366.1	0.310665	0.0908333	0.033891	-1.26115	down
MSTRG.139032.1	0.898952	0.485583	0.0342964	-0.652626	down
MSTRG.139385.3	0.200544	0.0646667	0.0119796	-1.28129	down
MSTRG.139603.1	0.164354	0.0615902	0.0332885	-1.0168	down
MSTRG.139896.9	0.265539	0.0970603	0.0368757	-1.13338	down
MSTRG.140090.1	0.409803	0.150792	0.0203336	-1.14886	down
MSTRG.140173.19	0.144648	0	4.62e-07	-4.08004	down
MSTRG.141003.1	0.601944	0.116422	0.00527625	-1.70409	down
MSTRG.141706.1	0.614582	0.269076	0.0205071	-0.923998	down
MSTRG.141713.1	0.315839	0.0896845	0.00544107	-1.4156	down
MSTRG.142570.1	0.340119	0.0842727	0.00349866	-1.57759	down
MSTRG.142573.14	0.25205	0.00551725	0.00332562	-2.57875	down
MSTRG.142735.28	0.0830117	0	4.31e-09	-4.74773	down
MSTRG.143304.7	0.220606	0	2.61e-11	-5.29085	down
MSTRG.143749.62	0.28714	0.026781	0.0311458	-1.86359	down
MSTRG.144419.3	2.1236	1.09976	0.0132876	-0.725102	down
MSTRG.144519.21	0.28481	0.0688295	0.000804863	-1.67911	down
MSTRG.144940.10	0.37205	0.0654985	0.0381652	-1.63065	down
MSTRG.145361.1	0.484228	0.196453	0.0327628	-0.970722	down
MSTRG.145419.1	0.203581	0.0828732	0.0109345	-1.00906	down
MSTRG.146373.1	1.00332	0.386997	0.00173221	-1.0868	down
MSTRG.146468.1	1.28688	0.149792	0.00115674	-2.24882	down
MSTRG.146473.1	0.0976263	0.0327415	0.016807	-1.15468	down
MSTRG.147297.14	0.520891	0	1.89e-11	-5.11902	down
MSTRG.148153.1	0.321338	0.126319	0.00403814	-1.09036	down
MSTRG.148507.2	0.407996	0.079347	0.0279887	-1.54972	down
MSTRG.14871.1	0.15517	0.0315418	0.0484795	-1.51095	down
MSTRG.148853.1	0.281608	0.022375	0.0378596	-1.82308	down
MSTRG.148961.2	0.341067	0.101533	0.00473835	-1.36937	down
MSTRG.149308.4	2.27397	0.195481	0.0149641	-2.06486	down
MSTRG.149605.1	0.454666	0.10924	0.00700518	-1.57348	down
MSTRG.14967.3	0.277731	0.151934	0.0169898	-0.650078	down
MSTRG.150247.1	0.323894	0.0891553	0.00912233	-1.33298	down
MSTRG.150249.1	0.370012	0.135992	0.038829	-1.03983	down
MSTRG.150640.3	0.324189	0.0138362	4.88e-06	-3.3064	down
MSTRG.150645.41	0.469119	0.093319	0.0117575	-1.7266	down
MSTRG.150967.22	0.282	0.0683067	0.00300228	-1.63176	down
MSTRG.151642.31	0.221067	0.0862172	0.0300844	-1.02383	down
MSTRG.151859.1	0.175639	0.0678157	0.0431757	-1.05632	down
MSTRG.15216.2	0.28469	0.101573	0.0159193	-1.17367	down
MSTRG.152502.4	0.0967277	0.0321538	0.0428034	-1.15408	down
MSTRG.153141.1	0.953406	0.374101	0.0314407	-1.03948	down
MSTRG.153424.14	0.187571	0	6.18e-09	-4.61445	down
MSTRG.153424.18	0.255609	0	1.39e-12	-5.31816	down
MSTRG.153503.2	0.2666	0.132901	0.0496536	-0.745735	down
MSTRG.153699.2	0.20439	0.0429428	0.00671714	-1.53944	down
MSTRG.154218.1	0.346742	0.0785948	0.00526908	-1.62544	down
MSTRG.15473.38	0.256268	0	6.14e-17	-6.53564	down
MSTRG.155130.1	0.37882	0.0151568	8.13e-06	-3.25402	down
MSTRG.15536.1	0.116806	0.0296707	0.024379	-1.35733	down
MSTRG.156299.1	0.268745	0.094919	0.0233283	-1.05075	down
MSTRG.156449.3	0.429464	0.0200248	0.00662583	-2.35842	down
MSTRG.157008.2	0.812486	0.201369	2.39e-05	-1.67462	down
MSTRG.157095.4	2.22583	0.368516	0.00218617	-1.98943	down
MSTRG.157134.2	0.948752	0	1.02e-05	-3.86841	down
MSTRG.157134.3	0.252717	0.00925175	0.0326043	-1.87256	down
MSTRG.157216.1	0.873146	0.321119	0.0467284	-1.05544	down
MSTRG.157634.3	0.889732	0.18911	0.0399845	-1.50115	down
MSTRG.16015.8	0.142782	0.002813	0.00848396	-2.31396	down
MSTRG.16825.13	0.24617	0.0691025	0.00852542	-1.4314	down
MSTRG.17071.6	0.20862	0.0205295	0.000563905	-2.25805	down
MSTRG.17527.15	0.099037	0	6.45e-07	-4.01286	down
MSTRG.17703.16	0.178328	0.0283867	0.00802014	-1.95481	down
MSTRG.18269.3	0.136254	0.0195062	0.000247151	-2.16997	down
MSTRG.18719.2	0.31581	0.020611	0.03644	-1.84177	down
MSTRG.18801.26	0.675527	0.35217	0.0423908	-0.713074	down
MSTRG.18907.1	0.197914	0.00356125	1.53e-05	-3.39738	down
MSTRG.19569.10	0.174485	0.00966225	0.00957216	-2.2475	down
MSTRG.19672.23	0.771154	0.265507	0.00188447	-1.24723	down
MSTRG.19790.1	0.347074	0.131812	0.0275929	-1.06684	down
MSTRG.20405.8	0.365636	0.0232405	0.000395687	-2.72506	down
MSTRG.21639.2	0.674122	0.188369	0.0134714	-1.44089	down
MSTRG.21907.3	0.110291	0.0106877	0.0314024	-1.81632	down
MSTRG.21927.58	0.28626	0.130001	0.0322142	-0.896587	down
MSTRG.22393.1	0.456874	0.221029	0.0201525	-0.799116	down
MSTRG.24469.1	0.738291	0.0092295	1.29e-07	-4.23439	down
MSTRG.24502.36	0.525631	0.276561	0.025092	-0.671696	down
MSTRG.24502.8	0.220863	0.0158093	0.0123585	-2.11265	down
MSTRG.24661.2	0.338007	0.0512457	0.044077	-1.67634	down
MSTRG.24790.2	0.574153	0.0753942	0.00406643	-2.09597	down
MSTRG.25433.1	0.477562	0.168473	0.0347718	-1.07647	down
MSTRG.25742.1	0.485402	0.169475	0.0160874	-1.16281	down
MSTRG.25745.28	0.78268	6.9e-05	2.82e-37	-8.19747	down
MSTRG.25830.1	0.156711	0.0403085	0.00259697	-1.4994	down
MSTRG.26782.29	0.243527	0.134192	0.0433251	-0.628216	down
MSTRG.26782.31	0.311338	0.13763	0.00525025	-0.920428	down
MSTRG.26782.33	0.247736	0.121374	0.00927737	-0.803239	down
MSTRG.2680.20	0.206945	0.0243105	0.0051116	-2.13025	down
MSTRG.2688.1	0.272494	0.117138	0.0402231	-0.965931	down
MSTRG.28296.2	0.190312	0.019295	0.0154455	-1.97929	down
MSTRG.30251.4	1.70803	0.0814625	0.0198934	-2.04856	down
MSTRG.3077.1	0.259855	0.13963	0.0381403	-0.66562	down
MSTRG.3078.1	0.333835	0.132106	0.0232265	-1.06615	down
MSTRG.3079.1	0.312304	0.132052	0.0178914	-0.981312	down
MSTRG.3204.1	0.177869	0.0606768	0.00535739	-1.23364	down
MSTRG.33274.1	0.332382	0.0566745	0.00302099	-1.9003	down
MSTRG.3331.3	0.093985	0	3.17e-12	-5.26804	down
MSTRG.3338.5	0.057748	0.007405	0.0349906	-1.75522	down
MSTRG.33916.2	0.416407	0.0916592	0.036742	-1.54908	down
MSTRG.33962.2	0.364533	0.136567	0.0387915	-1.0963	down
MSTRG.3398.4	0.653771	0.0170898	2.63e-10	-4.0353	down
MSTRG.34052.1	0.270133	0.0938155	0.00471751	-1.22622	down
MSTRG.34142.1	0.146925	0.038891	0.0490738	-1.31234	down
MSTRG.34937.5	0.257896	0	1.62e-13	-5.48501	down
MSTRG.34997.3	0.295527	0.014054	0.0219709	-2.01604	down
MSTRG.35438.2	0.222162	0.0605622	0.00937672	-1.41091	down
MSTRG.35791.1	0.143814	0.0241845	0.0116246	-1.74662	down
MSTRG.36087.27	0.158236	0.00239475	1.5e-07	-4.0638	down
MSTRG.36855.1	0.329167	0.111088	0.0125155	-1.26381	down
MSTRG.36949.1	0.650911	0.367091	0.000808574	-0.616427	down
MSTRG.38415.6	0.452696	0.016489	0.00117543	-2.76579	down
MSTRG.39495.41	0.279639	0.003035	0.0010783	-2.87355	down
MSTRG.39640.10	0.292831	0.164572	0.0485663	-0.608464	down
MSTRG.39942.2	0.359642	0	1.26e-09	-4.70057	down
MSTRG.40182.1	0.158918	0.0545293	0.0420118	-1.12672	down
MSTRG.41962.15	0.218343	0.040851	0.0318425	-1.63698	down
MSTRG.41962.20	0.319538	0.00163925	2.3e-07	-4.36546	down
MSTRG.42038.28	0.161685	0.0267103	0.0335455	-1.66589	down
MSTRG.42099.13	1.26433	0.637228	0.0115358	-0.763845	down
MSTRG.42223.1	0.176639	0.0627702	0.00197836	-1.17712	down
MSTRG.42330.1	0.328959	0.0948975	0.0146057	-1.40017	down
MSTRG.42403.1	0.677674	0.311032	0.0484947	-0.845113	down
MSTRG.42536.22	0.253305	0.033793	0.00253733	-2.1743	down
MSTRG.42561.1	0.455421	0.14107	0.0405306	-1.21791	down
MSTRG.42588.1	0.297654	0.096735	0.00291813	-1.26971	down
MSTRG.42609.43	0.703978	0.073787	0.0318675	-1.8515	down
MSTRG.42668.10	0.0312857	0.0008835	6.31e-05	-3.18736	down
MSTRG.42677.1	0.336517	0.134103	0.0251246	-1.03849	down
MSTRG.42679.1	0.231117	0.077859	0.0348171	-1.12689	down
MSTRG.43016.1	1.78758	0.835563	0.0341741	-0.846934	down
MSTRG.4311.3	0.708077	0.147745	0.00378195	-1.71996	down
MSTRG.43728.1	0.205554	0.0659248	0.0407917	-1.19381	down
MSTRG.43799.1	0.144178	0.0191657	0.00809116	-1.94592	down
MSTRG.44125.69	0.332727	0.0442278	0.0294736	-1.80713	down
MSTRG.44723.1	1.01703	0.304505	0.000672876	-1.3983	down
MSTRG.45024.16	0.377304	0.0517647	0.000200759	-2.30863	down
MSTRG.45091.6	0.235521	0.045953	0.0489598	-1.51221	down
MSTRG.46149.3	0.211235	0.045586	0.0122955	-1.58808	down
MSTRG.46616.66	0.257917	0.0760597	0.000415299	-1.47848	down
MSTRG.46834.14	0.554666	0.289855	0.0410668	-0.696402	down
MSTRG.4853.1	0.322434	0.0961157	0.0349382	-1.22623	down
MSTRG.4895.4	0.573183	0.250572	0.0179925	-0.924491	down
MSTRG.49260.2	0.223051	0.01494	0.00981092	-2.21671	down
MSTRG.49260.5	0.373256	0.113885	0.00285623	-1.39917	down
MSTRG.49304.20	1.96521	0.465517	0.0087876	-1.6215	down
MSTRG.49586.1	0.660112	0.336229	0.0329021	-0.739755	down
MSTRG.49873.19	0.216993	0.00567025	0.0424273	-1.74886	down
MSTRG.51365.1	0.250703	0.0294862	0.0412068	-1.72666	down
MSTRG.53059.2	0.14521	0	4.79e-09	-4.5633	down
MSTRG.53110.1	0.323698	0.066433	0.00608345	-1.71372	down
MSTRG.53869.1	0.207587	0.059162	0.0188937	-1.38046	down
MSTRG.54298.22	0.588393	0.272398	0.0455687	-0.882441	down
MSTRG.5507.1	0.199308	0.0267465	0.0445667	-1.68454	down
MSTRG.55341.11	0.426924	0.140719	0.0440012	-1.17966	down
MSTRG.55487.1	0.387404	0.0798125	0.00147629	-1.72221	down
MSTRG.55653.2	0.0908013	0	4.93e-09	-4.91828	down
MSTRG.56208.6	0.234749	0.114832	0.038541	-0.794068	down
MSTRG.56209.13	0.315968	0.137345	0.0433381	-0.909111	down
MSTRG.56851.28	0.225416	0.0262233	0.0310944	-1.82295	down
MSTRG.56851.8	0.854188	0.0513745	0.00054363	-2.75273	down
MSTRG.57017.1	0.133947	0.05603	0.0259914	-0.963453	down
MSTRG.57515.5	0.20747	0.0768097	0.00230562	-1.15335	down
MSTRG.57588.1	0.184263	0.0802222	0.0460992	-0.91453	down
MSTRG.58951.1	0.119114	0.0209355	0.03247	-1.64184	down
MSTRG.59297.1	0.236648	0.0683663	0.0075131	-1.39092	down
MSTRG.60345.1	0.195191	0.034385	0.0209711	-1.69857	down
MSTRG.61406.8	0.454334	0	7.71e-15	-6.21461	down
MSTRG.61419.4	1.93558	0.0280528	9.26e-05	-3.35707	down
MSTRG.62412.1	0.197851	0.0458765	0.00171639	-1.70108	down
MSTRG.62497.6	0.308416	0.0869873	0.0483315	-1.31438	down
MSTRG.62759.1	0.148414	0.0433357	0.0345353	-1.33397	down
MSTRG.62992.2	0.270679	0.0970025	0.00633769	-1.16537	down
MSTRG.63751.6	0.363427	0.18825	0.0210085	-0.725553	down
MSTRG.63752.1	0.583849	0.252401	0.0197474	-0.954553	down
MSTRG.63796.1	0.326603	0.0859122	0.00654708	-1.47765	down
MSTRG.64218.2	0.120784	0.008496	0.0105826	-2.18392	down
MSTRG.64228.32	0.446357	0.0796883	0.0248385	-1.69951	down
MSTRG.64259.1	0.175316	0.0742125	0.0336379	-0.927297	down
MSTRG.64269.1	0.318149	0.112316	0.0110095	-1.17104	down
MSTRG.65610.10	0.222575	0.00863675	0.00698905	-2.35234	down
MSTRG.65651.3	0.216597	0	6.26e-16	-5.97376	down
MSTRG.65869.2	0.165197	0.0280232	0.0231976	-1.7417	down
MSTRG.66909.86	1.43714	0.468572	0.0179673	-1.26594	down
MSTRG.6700.5	0.141774	0.0685898	0.0455123	-0.806472	down
MSTRG.67067.9	0.0862633	0.00237375	0.0093361	-2.28859	down
MSTRG.68052.50	0.303426	0	4.37e-16	-6.38823	down
MSTRG.69966.1	0.299059	0.106546	0.0180713	-1.12813	down
MSTRG.7035.1	0.128806	0.0733957	0.0105894	-0.602481	down
MSTRG.70704.1	0.478614	0.121735	0.00972457	-1.48418	down
MSTRG.70707.1	0.385053	0.0873975	0.00195049	-1.67732	down
MSTRG.71250.3	0.221359	0.025501	0.00149023	-2.25235	down
MSTRG.71597.2	0.333884	0.10186	0.0461825	-1.2813	down
MSTRG.72694.22	0.804065	0.232961	0.0194239	-1.37093	down
MSTRG.73345.87	0.268622	0.0543787	0.0294121	-1.64719	down
MSTRG.73543.1	0.166783	0.040172	0.0253725	-1.46581	down
MSTRG.73851.1	0.144761	0.0156282	0.00108466	-2.28622	down
MSTRG.75233.3	1.85324	0.0856393	0.00185439	-2.60826	down
MSTRG.75297.52	0.18422	0.0244658	0.00426562	-2.06029	down
MSTRG.7541.1	0.177783	0.0380368	0.0193391	-1.54795	down
MSTRG.75592.3	0.333146	0.117836	0.048613	-1.11118	down
MSTRG.76727.6	0.338598	0.006812	0.0248348	-1.94919	down
MSTRG.76805.15	0.12675	0	8.29e-12	-5.35369	down
MSTRG.76935.2	0.23154	0	1.44e-08	-4.64176	down
MSTRG.78678.1	0.227245	0.027712	0.0387362	-1.74327	down
MSTRG.79718.1	0.184768	0.0616775	0.00636792	-1.25214	down
MSTRG.80043.1	0.159228	0.0698567	0.0475176	-0.909729	down
MSTRG.80997.1	0.33249	0	3.12e-07	-4.21563	down
MSTRG.81669.25	0.334517	0.0238613	0.0349186	-1.85414	down
MSTRG.82272.3	0.233674	0.0017085	1.15e-06	-4.0587	down
MSTRG.82329.12	0.619132	0.308543	0.0171747	-0.78687	down
MSTRG.82450.3	0.0988843	0.0178757	0.000200319	-1.90955	down
MSTRG.82541.15	0.674043	0.304079	0.000351025	-0.923405	down
MSTRG.82779.33	0.102824	0.004994	0.0189844	-2.06184	down
MSTRG.82779.38	0.229312	0.0540443	0.0299174	-1.41061	down
MSTRG.83014.11	0.242349	0.000289	1.14e-10	-5.15475	down
MSTRG.84049.1	0.154614	0.0435813	0.0171072	-1.26183	down
MSTRG.84053.1	0.153615	0.062744	0.00235669	-1.03171	down
MSTRG.84291.1	0.323375	0.149219	0.037369	-0.842136	down
MSTRG.84442.19	0.2034	0.015357	0.00077552	-2.62459	down
MSTRG.84601.26	0.255067	0.0768475	0.0238793	-1.27414	down
MSTRG.84605.1	0.178588	0.017731	0.00188477	-2.32707	down
MSTRG.84605.38	0.148422	0.00721675	0.0280167	-1.93425	down
MSTRG.84610.1	0.197161	0.046176	7.89e-05	-1.74979	down
MSTRG.84612.1	0.314618	0.110868	0.0130654	-1.18643	down
MSTRG.856.1	6.15496	2.51016	0.0277463	-1.00605	down
MSTRG.85910.2	0.284251	0	7.68e-07	-3.98808	down
MSTRG.86189.5	0.196126	0.0621042	0.0234904	-1.22643	down
MSTRG.86190.3	0.376996	0.0334052	0.00375413	-2.27399	down
MSTRG.86451.6	0.234858	0.030097	0.0246266	-1.85675	down
MSTRG.86945.2	0.202048	0.0295505	0.0283639	-1.75172	down
MSTRG.86951.1	0.213362	0.102339	0.0392182	-0.822292	down
MSTRG.8742.37	0.196104	0.016998	1.14e-05	-2.7518	down
MSTRG.88426.2	0.160332	0.0166125	0.0373993	-1.79597	down
MSTRG.89323.1	0.230783	0.0648588	0.0196922	-1.33422	down
MSTRG.90680.3	0.187044	0.0097975	0.0236596	-1.98915	down
MSTRG.90973.51	0.138582	0.034357	0.00200999	-1.63093	down
MSTRG.91458.1	0.187555	0.0456543	0.0428201	-1.41354	down
MSTRG.91503.8	0.165529	0.0148048	0.0175458	-2.03671	down
MSTRG.91506.1	0.216415	0.0698135	0.0347206	-1.21602	down
MSTRG.92183.4	1.41091	0.157931	0.0189735	-1.95763	down
MSTRG.92813.1	0.440684	0.132769	0.0299284	-1.32176	down
MSTRG.93008.10	0.292065	0.059085	0.0031246	-1.77464	down
MSTRG.93537.11	0.295123	0.0156328	0.0150035	-2.1351	down
MSTRG.93750.1	0.094737	0.028778	0.0288613	-1.28455	down
MSTRG.93757.3	0.177928	0	2.87e-10	-5.08925	down
MSTRG.93772.8	0.418049	0.025745	0.00675813	-2.31557	down
MSTRG.94304.29	0.240256	0.0751015	0.0422276	-1.28561	down
MSTRG.94558.4	0.24618	0.00484	8.17e-09	-4.08715	down
MSTRG.94909.1	0.359902	0.118684	0.010355	-1.26094	down
MSTRG.95357.60	0.337876	0.0727575	0.0228127	-1.58768	down
MSTRG.95728.82	0.174901	0.0150533	0.01283	-2.08633	down
MSTRG.95744.4	0.0664457	0.0033905	0.00228659	-2.55897	down
MSTRG.95880.1	0.144156	0.0522528	0.0204227	-1.1357	down
MSTRG.95892.14	0.26291	0.104513	0.0113154	-1.04656	down
MSTRG.96130.2	0.17711	0.0325327	0.00818793	-1.8055	down
MSTRG.97803.1	0.222069	0.0203	0.00284029	-2.33486	down
MSTRG.98766.5	0.40966	0.193702	0.0152983	-0.851162	down
MSTRG.99077.2	0.19978	0.081309	0.0340242	-0.994003	down
MSTRG.99904.19	0.364326	0	3.26e-23	-7.25019	down
MSTRG.100208.32	0.498628	0.665647	5.32e-05	0.606096	up
MSTRG.101263.1	0.17233	0.27079	0.000833165	0.83404	up
MSTRG.101373.2	0.1401	0.323288	0.0449081	1.19414	up
MSTRG.101512.1	0.064152	0.277576	0.048408	1.50057	up
MSTRG.101548.1	0.10165	0.242336	0.045941	1.1638	up
MSTRG.102005.1	0.075874	0.142378	0.0281588	0.990524	up
MSTRG.102006.1	0.176382	0.264244	0.00187383	0.764373	up
MSTRG.102168.1	0.0149157	0.0643975	0.00664997	1.88572	up
MSTRG.102521.9	0	0.250648	0.00460932	2.49168	up
MSTRG.103771.1	0.828693	1.55758	0.00018596	1.0692	up
MSTRG.104391.11	0	0.176388	0.0232833	1.98392	up
MSTRG.104528.3	0.0297893	0.198547	0.00288915	2.18637	up
MSTRG.104569.4	0.0946273	0.268994	0.0202317	1.41499	up
MSTRG.105847.1	0.491768	0.65405	0.0141443	0.602703	up
MSTRG.106024.24	0	0.142816	3e-10	4.95002	up
MSTRG.107421.1	0.0628243	0.160036	0.0168417	1.32458	up
MSTRG.107780.11	0.0286187	0.200444	0.00788191	2.1133	up
MSTRG.108144.1	14.6485	20.3662	0.00159788	0.669402	up
MSTRG.108315.2	0.00755	0.0566038	0.0148424	2.02563	up
MSTRG.108366.32	0	0.105333	0.00873991	2.30812	up
MSTRG.108527.11	0	0.40336	0.0377962	1.804	up
MSTRG.109063.55	0.075658	0.179934	0.0218425	1.27773	up
MSTRG.109063.64	0.152602	0.43176	0.0453511	1.36578	up
MSTRG.109211.1	0.110845	0.395871	0.00102001	1.71126	up
MSTRG.109646.1	0.144249	0.283417	0.0466284	1.0177	up
MSTRG.110120.1	0.160302	0.283033	0.00385137	0.967696	up
MSTRG.110543.1	0.211624	0.384139	0.00620391	0.981155	up
MSTRG.110831.1	0.390893	0.554345	0.00234003	0.676778	up
MSTRG.111009.3	0	0.207521	0.00390552	2.53502	up
MSTRG.111366.3	0.0274377	0.335857	0.00583604	2.31415	up
MSTRG.111406.38	0.00756833	0.179479	0.0351844	1.85359	up
MSTRG.111492.2	0.102106	0.220737	0.00768684	1.22815	up
MSTRG.111544.2	0.0166073	0.149328	0.00766881	2.17744	up
MSTRG.111808.2	0.0182537	0.237068	0.00506926	2.17335	up
MSTRG.111826.18	0.144764	0.32235	0.0283564	1.18144	up
MSTRG.111826.21	0.24594	0.391764	0.0236385	0.81859	up
MSTRG.111826.25	0.145366	0.257748	0.0237003	0.937214	up
MSTRG.111826.26	0	0.260377	5.29e-17	6.06746	up
MSTRG.112006.3	0.0807467	0.289239	0.008731	1.66711	up
MSTRG.112163.2	0.0727373	0.209888	0.0419001	1.383	up
MSTRG.11253.1	0.148867	0.27149	0.0164561	0.981148	up
MSTRG.112617.1	0.036297	0.138087	0.0052272	1.62402	up
MSTRG.11309.16	0.05574	0.131325	0.0153466	1.22541	up
MSTRG.113399.1	0.358806	0.6034	0.0299745	0.907287	up
MSTRG.113666.3	0.018711	0.264577	0.0341163	1.85605	up
MSTRG.113738.1	0.033041	0.081126	0.0266733	1.28674	up
MSTRG.113930.15	0	0.0956552	0.00438016	2.5029	up
MSTRG.114063.1	0.239719	0.432154	0.000909764	1.01053	up
MSTRG.114064.1	0.342451	0.514037	0.0201905	0.752887	up
MSTRG.114665.14	0	0.230923	8.61e-11	5.01942	up
MSTRG.114696.1	0.0240537	0.190191	0.0153478	1.9924	up
MSTRG.114731.5	0	0.0489545	0.00758198	2.35078	up
MSTRG.114890.1	0.154738	0.323574	0.00931837	1.12754	up
MSTRG.114891.54	0.122293	0.893548	0.0408587	1.76105	up
MSTRG.115511.64	0	0.159641	0.00693213	2.37716	up
MSTRG.115520.46	0.005707	0.116533	0.00765461	2.31041	up
MSTRG.115546.27	0	0.157815	0.0199167	2.04052	up
MSTRG.115662.9	0	0.09715	0.0206751	2.02671	up
MSTRG.115682.2	0	0.103939	0.0286612	1.90906	up
MSTRG.115716.1	0.103141	0.197056	0.0486509	1.01638	up
MSTRG.115870.2	0.016893	0.258462	0.0152218	2.10197	up
MSTRG.115874.1	0.205909	0.394913	0.0228994	1.02487	up
MSTRG.115959.1	0.144957	0.323051	0.0393606	1.11558	up
MSTRG.116107.1	0.324204	0.54616	0.0404825	0.910241	up
MSTRG.116271.1	0.082811	0.445451	0.0205966	1.84179	up
MSTRG.116271.2	0.021801	0.142583	0.0109624	1.97085	up
MSTRG.116276.1	0.020886	0.268676	0.0186484	2.04147	up
MSTRG.116372.3	0	0.162362	0.012749	2.18828	up
MSTRG.116812.9	0.0117207	0.077402	0.0490803	1.68409	up
MSTRG.117449.2	0.001711	0.033364	0.00766639	2.29925	up
MSTRG.11814.45	0.334174	0.774137	0.00740113	1.26434	up
MSTRG.118269.2	0	0.332054	0.0110839	2.23313	up
MSTRG.118278.1	0.0663673	0.872785	0.00343527	2.4269	up
MSTRG.118708.15	0.02627	0.185448	0.0179134	1.93922	up
MSTRG.118708.19	0	0.16956	0.0332847	1.8529	up
MSTRG.118936.40	0	0.327458	0.0467355	1.7194	up
MSTRG.119560.22	0.0222267	0.196095	0.00983998	2.09028	up
MSTRG.119806.9	0.132446	0.756562	0.000146582	2.3442	up
MSTRG.120156.2	0	0.07044	0.0148567	2.13887	up
MSTRG.12148.2	0.132393	0.30059	0.00841398	1.24805	up
MSTRG.121609.1	0.245785	0.365416	0.0210313	0.746623	up
MSTRG.121675.26	0.108961	0.257901	0.0380147	1.23715	up
MSTRG.122783.1	0.197574	0.479699	0.00295066	1.36774	up
MSTRG.123013.1	0.0482687	0.176547	0.00481947	1.6323	up
MSTRG.123018.7	0.098842	0.216668	0.0137371	1.20556	up
MSTRG.123762.2	0	0.0667598	0.0311057	1.87939	up
MSTRG.123863.1	0	0.210734	0.00737125	2.35875	up
MSTRG.123963.36	0.0976673	0.215481	0.0324034	1.16898	up
MSTRG.124238.1	0.327012	0.486189	0.000539826	0.747325	up
MSTRG.125752.2	0	0.310975	0.034782	1.83572	up
MSTRG.126222.2	0.0772823	0.147813	0.0473464	1.03269	up
MSTRG.126530.14	0.0379813	0.228422	0.00150684	2.1115	up
MSTRG.126571.14	0	0.511111	1.33e-22	7.22371	up
MSTRG.126598.23	0.000494333	0.25008	1.46e-11	5.19949	up
MSTRG.127128.6	0.00850633	0.0648035	0.0154986	1.97795	up
MSTRG.127128.7	0.006414	0.0760222	0.00442792	2.32114	up
MSTRG.127508.6	0.011091	0.175373	3.73e-07	3.29125	up
MSTRG.127627.1	0.0355827	0.285541	0.00273303	2.28596	up
MSTRG.12874.1	0.0707283	0.122457	0.0244629	0.907776	up
MSTRG.129746.1	0.035159	0.284419	0.0249102	1.91335	up
MSTRG.129783.1	0	0.148167	0.00570425	2.43339	up
MSTRG.129983.1	0.0380567	0.143729	0.041554	1.48166	up
MSTRG.1303.1	0.087653	0.641143	0.000242376	2.48634	up
MSTRG.1303.2	0.02974	0.494731	0.0142843	2.13334	up
MSTRG.130556.8	0.0125453	0.107304	0.00831649	2.14095	up
MSTRG.130574.1	0.162994	0.253985	0.0494075	0.773448	up
MSTRG.130588.12	0	0.0768222	0.029787	1.89485	up
MSTRG.130780.25	0.00317733	0.107467	0.00210307	2.64807	up
MSTRG.130959.16	0.0211783	0.58756	0.03694	1.83443	up
MSTRG.130966.1	0.446712	1.21167	0.041638	1.34965	up
MSTRG.131250.3	0	0.182537	0.00154419	2.78144	up
MSTRG.131250.6	0.000325333	0.12219	0.0211098	2.02211	up
MSTRG.131288.55	0.030847	0.420398	0.00787316	2.26909	up
MSTRG.131423.14	0.315885	0.789311	0.00580182	1.37421	up
MSTRG.131932.1	0.09002	0.473419	0.0014386	2.01482	up
MSTRG.131939.1	0.306814	0.581772	0.0254935	1.00313	up
MSTRG.132501.3	0	0.978564	0.000316722	3.1505	up
MSTRG.132501.4	0.04237	0.380751	0.00848454	2.16163	up
MSTRG.132733.1	0.0384113	0.116236	0.0483844	1.30852	up
MSTRG.132768.10	0.0861437	0.44039	0.00529826	1.98172	up
MSTRG.132775.1	0.273263	0.398752	0.00371576	0.717224	up
MSTRG.132977.13	0.110921	0.229701	0.00134545	1.16827	up
MSTRG.133113.1	0.131099	0.185835	0.0112599	0.673121	up
MSTRG.133478.20	0.0648997	0.309239	0.00754428	1.90179	up
MSTRG.1337.1	0.00559033	0.268438	0.00622366	2.39252	up
MSTRG.133880.4	0.0196427	0.164451	0.00989454	2.10467	up
MSTRG.134123.4	0.076621	0.197936	0.0220478	1.34933	up
MSTRG.134307.21	0.308074	0.589067	0.0316483	1.02693	up
MSTRG.134947.4	0	0.198321	0.0154764	2.12532	up
MSTRG.135076.1	0.170316	0.27157	0.0349592	0.818068	up
MSTRG.135077.1	0.0880587	0.208119	0.00812306	1.27385	up
MSTRG.135280.1	0.045124	0.138858	0.0373258	1.428	up
MSTRG.135550.30	0.128571	0.342745	0.0312474	1.30246	up
MSTRG.135740.28	0	0.172384	0.0147064	2.14163	up
MSTRG.135930.17	0	0.20138	0.0220505	2.00616	up
MSTRG.136018.22	0.098556	0.752366	0.0498229	1.69726	up
MSTRG.13608.16	0.174138	0.317934	0.0387523	0.957949	up
MSTRG.136168.1	0.316046	0.589323	0.0277632	1.00366	up
MSTRG.13622.6	0.0411473	0.243753	0.0113047	1.96535	up
MSTRG.136235.32	0	0.237923	0.0347892	1.83534	up
MSTRG.136605.1	0.0129617	0.126714	0.0011865	2.50973	up
MSTRG.136930.1	0.0354363	0.279143	0.00361097	2.27554	up
MSTRG.137499.2	0.0202707	0.301571	1.09e-05	3.05192	up
MSTRG.137520.1	0.045591	0.158019	0.00347508	1.53505	up
MSTRG.137741.1	0.0142153	0.127794	0.00162841	2.43901	up
MSTRG.138168.2	0.0793117	0.22007	0.0335539	1.3287	up
MSTRG.138219.3	0	0.282198	2.29e-06	3.84823	up
MSTRG.13852.6	0.00625467	0.0477308	0.013728	1.9928	up
MSTRG.1393.3	0	0.15339	0.0324786	1.8628	up
MSTRG.139646.3	0.0272677	0.363133	0.0179825	2.04909	up
MSTRG.139707.1	0.158954	0.281238	0.0456381	0.903195	up
MSTRG.139924.1	0	0.170635	0.00730869	2.36161	up
MSTRG.139942.29	0.0292067	0.153144	0.0104039	1.89195	up
MSTRG.140077.4	0	0.217941	0.024172	1.97084	up
MSTRG.140078.13	0.00847633	0.282535	4.99e-06	3.5516	up
MSTRG.140090.3	0.0433343	0.312968	0.000194432	2.42822	up
MSTRG.14034.3	0.067038	0.286394	0.00129991	1.91719	up
MSTRG.140649.1	0.0351977	0.152011	0.0147588	1.71177	up
MSTRG.140930.2	6.86667e-05	0.172823	2.08e-08	4.33252	up
MSTRG.141101.1	0.0750517	0.215117	0.0335238	1.3831	up
MSTRG.141103.1	0.179894	0.443195	0.0324101	1.23026	up
MSTRG.142571.2	0.136813	0.229988	0.0196444	0.888065	up
MSTRG.142591.1	0.110895	0.187488	0.0407032	0.870411	up
MSTRG.142810.42	0	0.120711	0.00106846	2.87345	up
MSTRG.143027.1	0.02563	0.153094	0.0125839	1.95092	up
MSTRG.143046.33	0	0.17739	0.0129403	2.18366	up
MSTRG.143046.35	0.024749	0.102344	0.0223771	1.6556	up
MSTRG.143255.1	0.0577013	0.166214	0.0121905	1.39289	up
MSTRG.143271.5	0.00433767	0.108767	0.0343099	1.86322	up
MSTRG.143278.1	0.130284	0.213196	0.032941	0.867005	up
MSTRG.143280.2	0.00164433	0.100079	0.00697742	2.37136	up
MSTRG.143287.26	0.0179857	0.174118	0.00454162	2.29662	up
MSTRG.143341.51	0	0.152036	0.0160945	2.11158	up
MSTRG.143526.1	0.125399	0.375897	0.00124595	1.62074	up
MSTRG.143673.21	0	0.0665038	0.01233	2.19925	up
MSTRG.143715.18	0.321705	0.556681	0.0458164	0.905459	up
MSTRG.143976.4	0.001884	0.090635	7.24e-06	3.46901	up
MSTRG.144110.1	0.0493757	0.145902	0.0355313	1.38962	up
MSTRG.144821.1	0.0750587	0.147398	0.0276397	1.05511	up
MSTRG.144890.1	0.0492227	0.148819	0.0387883	1.39718	up
MSTRG.144940.14	0.001729	0.157415	0.000334897	3.08683	up
MSTRG.145704.1	0.0350087	0.086085	0.0442898	1.21236	up
MSTRG.145840.1	0.118632	0.234991	0.00633369	1.11462	up
MSTRG.146389.19	0.042117	0.111864	0.0384322	1.18862	up
MSTRG.146501.1	0.146312	0.294988	0.00387814	1.14321	up
MSTRG.147297.12	0	0.228576	0.00829357	2.32396	up
MSTRG.147320.1	0.110778	0.177092	0.0437885	0.811026	up
MSTRG.148883.1	0.029402	0.111062	0.00634668	1.63006	up
MSTRG.149082.7	0.37671	0.5567	0.00017782	0.745794	up
MSTRG.149226.1	0.710875	1.37978	0.00173082	1.08497	up
MSTRG.14928.8	0.0299367	0.0823712	0.0432862	1.27153	up
MSTRG.149338.7	0.0375437	0.308553	0.0492427	1.71283	up
MSTRG.149626.1	0.029462	0.122843	0.0436589	1.55287	up
MSTRG.149627.2	0.0310893	0.114047	0.0194089	1.46121	up
MSTRG.149862.3	0.00428767	0.164535	6.43e-05	3.30149	up
MSTRG.150244.57	0	0.166557	0.005708	2.43271	up
MSTRG.150421.2	0.085251	0.203941	0.049521	1.08949	up
MSTRG.151038.1	0.215647	0.450453	0.0460292	1.06314	up
MSTRG.151374.15	0.132002	0.258862	0.00600084	1.09891	up
MSTRG.152190.1	0.119116	0.259952	0.0462029	1.07491	up
MSTRG.152224.1	0.0559443	0.176893	0.00331547	1.62504	up
MSTRG.15240.45	0.006402	0.272675	0.0390656	1.80767	up
MSTRG.153048.89	0	0.308027	2.49e-12	5.34454	up
MSTRG.153086.2	0	0.145883	4.87e-06	3.73694	up
MSTRG.153092.1	0.210935	0.377253	0.0035718	0.975562	up
MSTRG.153395.5	0	0.325886	2.81e-08	4.53328	up
MSTRG.153424.20	0	0.374553	0.0164997	2.10332	up
MSTRG.153789.15	0.00974367	0.586531	1.54e-06	3.83716	up
MSTRG.153789.3	0	0.693323	0.0118916	2.21081	up
MSTRG.154232.1	0.21533	0.342413	0.0417449	0.809446	up
MSTRG.154980.1	0.8822	1.63074	0.00417033	1.04908	up
MSTRG.154990.1	0.003119	0.163792	0.0155015	2.12985	up
MSTRG.155054.5	0	0.213431	0.0255368	1.95287	up
MSTRG.155197.2	0.107604	0.365924	0.0220015	1.55228	up
MSTRG.155585.2	0	0.168123	0.00626302	2.40664	up
MSTRG.155590.20	0.0142783	0.157219	0.00835726	2.17347	up
MSTRG.155665.3	0	0.954787	0.00908387	2.2955	up
MSTRG.156089.11	0.0147973	0.656857	0.00751225	2.34302	up
MSTRG.156478.1	0.0550393	0.24188	0.0071481	1.87394	up
MSTRG.156505.1	0.0574943	0.289214	0.0431348	1.63138	up
MSTRG.156546.12	0	0.17749	0.0425819	1.75673	up
MSTRG.156558.1	0.0524957	0.343411	0.0230385	1.80742	up
MSTRG.156585.1	7.90519	10.819	0.00238598	0.636079	up
MSTRG.156630.5	0.153004	0.408284	0.0241006	1.33422	up
MSTRG.157095.1	0.079498	1.40915	1.16e-05	3.22498	up
MSTRG.15904.2	0	0.11012	0.000235226	3.18202	up
MSTRG.15997.1	0.396851	0.539169	0.00151857	0.620148	up
MSTRG.160732.39	0.227936	0.59243	0.0299843	1.30555	up
MSTRG.16250.1	0.109995	0.250682	0.0437469	1.09514	up
MSTRG.16998.7	0.05315	0.144309	0.0415261	1.30272	up
MSTRG.17002.1	0.0489303	0.203839	0.00574904	1.6767	up
MSTRG.17454.1	0.18666	0.372575	0.0204294	1.07357	up
MSTRG.17530.2	0.00899033	0.239518	0.000848095	2.70582	up
MSTRG.17539.17	0.0206173	0.230031	0.0134405	2.11516	up
MSTRG.17545.11	0	0.264369	0.0430048	1.75272	up
MSTRG.17703.7	0.108571	0.238131	0.0422294	1.15636	up
MSTRG.17762.7	0.189344	0.361515	0.0100704	1.06885	up
MSTRG.18056.4	0.00340967	0.309642	1.57e-06	3.95299	up
MSTRG.1826.20	0.028289	0.134965	0.0437031	1.62817	up
MSTRG.18296.2	0.000485667	0.181832	0.000249197	3.16817	up
MSTRG.18305.46	0.0319157	0.222292	0.00771884	2.12513	up
MSTRG.18319.2	0	0.280614	0.0232791	1.98381	up
MSTRG.18390.2	0.0330457	0.234246	0.0199636	1.94181	up
MSTRG.18676.1	0.051145	0.123028	0.0350466	1.24983	up
MSTRG.18717.1	0.173512	0.324493	0.0445907	0.975837	up
MSTRG.18728.2	0.00391767	0.284168	8.24e-12	4.40849	up
MSTRG.18783.1	0.212116	0.313254	0.0479079	0.711938	up
MSTRG.18785.2	0.113826	0.82463	0.00717157	2.13438	up
MSTRG.19476.8	0.000142333	0.134187	0.0115028	2.22426	up
MSTRG.19613.1	0	0.200163	0.00472681	2.48559	up
MSTRG.19984.1	0.0538477	0.151054	0.0419769	1.28792	up
MSTRG.20206.12	0.00682367	0.260423	0.0123392	2.2022	up
MSTRG.20693.2	1.06667e-05	0.401321	1e-14	5.86981	up
MSTRG.2090.1	0.144505	0.274512	0.0133208	1.03911	up
MSTRG.21359.1	0.046449	0.222647	0.0112331	1.83985	up
MSTRG.21486.1	0.16974	0.48643	0.0219479	1.414	up
MSTRG.22294.1	0.0447597	0.155846	0.00319508	1.69856	up
MSTRG.22803.1	0.0893	0.200863	0.0072429	1.27394	up
MSTRG.23438.6	0.010988	0.219359	0.00511224	2.41867	up
MSTRG.23514.1	0.183406	0.305307	0.0371635	0.832494	up
MSTRG.23544.1	0.113884	0.262992	0.00115062	1.31712	up
MSTRG.24025.1	0.0756293	0.19162	0.030472	1.28359	up
MSTRG.24262.18	0.00983333	0.0545003	0.037663	1.70186	up
MSTRG.24407.81	0.0158567	0.921787	1.42e-21	5.19919	up
MSTRG.24469.4	0	0.550608	0.0363587	1.8185	up
MSTRG.24492.1	0.146152	0.252337	0.0455744	0.897604	up
MSTRG.24532.14	0	0.211396	0.00687375	2.3793	up
MSTRG.24613.2	0.066733	0.287022	0.0183937	1.52578	up
MSTRG.24724.4	0.0486797	0.190974	0.0215151	1.70278	up
MSTRG.24810.10	0	0.222548	0.00863287	2.311	up
MSTRG.25503.4	0	0.199243	0.0403456	1.77806	up
MSTRG.25511.1	0.133029	0.27407	0.0111372	1.13761	up
MSTRG.25720.1	0.090082	0.173186	0.00166198	1.08043	up
MSTRG.25762.10	0.037815	0.113334	0.00615971	1.55561	up
MSTRG.25880.43	0.001458	0.146237	0.00546302	2.44445	up
MSTRG.26082.32	0.023585	0.136329	0.0346247	1.75304	up
MSTRG.2663.23	0.134494	1.38418	0.000189511	2.7054	up
MSTRG.27215.93	0	0.243222	9.14e-11	4.89541	up
MSTRG.27215.99	0.0495873	0.25597	0.035763	1.70902	up
MSTRG.2732.1	0.996289	1.51633	0.00389765	0.769364	up
MSTRG.28224.33	0.498312	0.78958	0.0495267	0.807523	up
MSTRG.29294.7	0.0619603	0.238082	0.0153179	1.68514	up
MSTRG.30086.1	0.071047	1.45957	0.00139478	2.69928	up
MSTRG.30429.1	0.275125	0.384962	0.0119343	0.651356	up
MSTRG.31063.6	0.00581667	0.142039	3.49e-05	3.20919	up
MSTRG.31153.1	0.771782	1.09827	0.0234261	0.69176	up
MSTRG.31574.1	0.0616003	0.155593	0.0199248	1.2787	up
MSTRG.31655.5	0.0691107	0.241153	0.0191565	1.5885	up
MSTRG.31781.1	0.0841137	0.317071	0.0181233	1.54202	up
MSTRG.31846.1	0.338758	0.489744	0.00961322	0.697494	up
MSTRG.32398.2	0	0.183521	0.00709901	2.37012	up
MSTRG.32487.2	0.39327	2.86498	0.0445788	1.73108	up
MSTRG.32745.1	0.207452	0.398839	0.0480044	1.00392	up
MSTRG.32758.16	0.0134077	0.166907	0.0148696	2.09954	up
MSTRG.33288.13	0.240472	0.37481	0.0274681	0.787372	up
MSTRG.34377.1	0.048513	0.223791	0.00669281	1.87601	up
MSTRG.34382.3	0.334488	0.462049	0.0425432	0.638699	up
MSTRG.34396.1	0.113871	0.255774	0.0331072	1.1594	up
MSTRG.35016.6	0.0836077	0.14743	0.0419233	0.935864	up
MSTRG.3530.30	0	0.220386	0.0239784	1.9731	up
MSTRG.3547.15	0.0275597	0.302364	0.0223207	1.98077	up
MSTRG.35639.2	0	0.146324	0.00603449	2.41748	up
MSTRG.35971.4	0.77984	1.38859	0.0447935	0.919023	up
MSTRG.36570.4	0	0.158441	0.011321	2.22681	up
MSTRG.36736.1	0.220518	0.801396	0.000317933	1.87379	up
MSTRG.38173.2	0	0.360421	5.7e-20	6.39223	up
MSTRG.39457.4	0	0.0600958	0.00941139	2.28584	up
MSTRG.39470.29	0	0.212204	3.62e-13	5.40243	up
MSTRG.39495.34	0.000203	0.340837	0.0321689	1.86568	up
MSTRG.39495.40	0.0399627	0.271799	0.0226588	1.87611	up
MSTRG.3987.1	0.333025	0.570587	0.0136773	0.902864	up
MSTRG.39939.2	0	0.161798	0.00548142	2.44502	up
MSTRG.39940.1	0.0577207	0.336919	0.0200603	1.85224	up
MSTRG.40207.1	0.260915	0.361213	0.0272104	0.639264	up
MSTRG.40535.1	0.100149	0.344753	0.0251562	1.49629	up
MSTRG.40547.1	0.0806087	0.190181	0.039033	1.13364	up
MSTRG.40711.1	0.0377397	0.168127	0.0149701	1.72347	up
MSTRG.41046.1	0.0311113	0.16272	0.0436413	1.63878	up
MSTRG.4137.1	0.043657	0.150266	0.0440274	1.41759	up
MSTRG.4137.3	0.0284753	0.127585	0.0117284	1.78021	up
MSTRG.42038.27	0.004229	0.191059	0.0338058	1.86157	up
MSTRG.42092.41	0.0187033	0.160972	0.00552689	2.23732	up
MSTRG.42467.1	0.0616443	0.140597	0.00877573	1.18065	up
MSTRG.42608.1	0.10117	0.291887	0.0318106	1.24613	up
MSTRG.43516.15	0.37741	0.631677	0.0241469	0.869426	up
MSTRG.4352.50	0.503613	0.942142	0.000600981	1.06179	up
MSTRG.43543.1	0.229712	0.623567	0.0321273	1.32029	up
MSTRG.43606.88	0	0.355616	0.0380564	1.80081	up
MSTRG.43610.1	0.284602	0.681901	0.0216449	1.27382	up
MSTRG.43702.2	9.66667e-06	0.163844	2.33e-12	4.89777	up
MSTRG.43961.1	0.106578	0.193629	0.0431674	0.93392	up
MSTRG.43996.7	0	0.195368	0.0118945	2.21138	up
MSTRG.44125.93	0.132748	0.219274	0.0190901	0.888501	up
MSTRG.44140.1	0.086136	0.221094	0.0339811	1.259	up
MSTRG.44261.31	0.00415067	0.439303	0.0417718	1.7732	up
MSTRG.44470.2	0	0.107786	0.00919591	2.29166	up
MSTRG.44791.6	0	0.105457	0.00032349	3.13253	up
MSTRG.44818.1	0.029729	0.0785197	0.0284657	1.21825	up
MSTRG.45024.5	0.309191	0.440057	0.000660422	0.693103	up
MSTRG.45092.1	0.0390603	0.116148	0.00497095	1.51123	up
MSTRG.45225.15	0.0975383	0.396815	0.00115942	1.90689	up
MSTRG.45681.1	0.176592	0.357461	0.0203044	1.09495	up
MSTRG.45782.1	0.0470037	0.10111	0.00560242	1.1751	up
MSTRG.46310.9	0.0155817	0.180059	0.000142175	2.79328	up
MSTRG.4691.35	0.001424	0.159336	0.0062328	2.40638	up
MSTRG.47127.2	0.00439633	0.31143	1.73e-14	4.76372	up
MSTRG.47152.1	0	0.0930818	8.62e-06	3.73646	up
MSTRG.47331.1	0.757425	1.07054	0.0135627	0.668861	up
MSTRG.48565.6	0.0338523	0.195581	0.0130368	1.88946	up
MSTRG.4895.3	0.053987	0.284375	0.0192508	1.82182	up
MSTRG.4896.2	0.000172333	0.183507	0.000441736	3.06323	up
MSTRG.49522.3	0.141209	0.22509	0.0217201	0.825137	up
MSTRG.49619.16	0.139878	0.415389	0.042352	1.38734	up
MSTRG.49731.14	0	0.198621	8.61e-10	4.99072	up
MSTRG.49733.1	0.0970863	0.235977	0.0114294	1.30851	up
MSTRG.49762.1	0.016315	0.190243	0.0101935	2.1676	up
MSTRG.5020.16	0.158207	0.309022	0.0064247	1.1101	up
MSTRG.5020.17	0.0685553	0.269215	0.00444658	1.84323	up
MSTRG.5048.1	0.10109	0.211111	0.0168574	1.16086	up
MSTRG.50629.1	0.120975	0.22376	0.0298975	0.992012	up
MSTRG.50978.3	0.18626	0.428019	0.00199087	1.31336	up
MSTRG.51464.1	0.085595	0.170766	0.0330479	1.04112	up
MSTRG.51778.37	0.00138767	0.221882	1.27e-11	4.79638	up
MSTRG.51962.1	0.0658187	0.207252	0.0101052	1.50237	up
MSTRG.5215.1	0.41932	1.13067	0.013306	1.43355	up
MSTRG.52158.1	0.130992	0.236086	0.0410183	0.97949	up
MSTRG.52159.2	0.000342	0.125234	0.00889125	2.30248	up
MSTRG.5236.2	3.53333e-05	0.0937853	0.011205	2.22931	up
MSTRG.52497.2	0	0.231187	0.00893918	2.30057	up
MSTRG.52559.1	0.107124	0.182767	0.00978879	0.907485	up
MSTRG.52706.57	0.17283	0.367773	0.0491041	1.12423	up
MSTRG.52782.4	0.0208443	0.18113	0.0113894	2.10239	up
MSTRG.52811.1	0.005851	0.089547	0.0455434	1.75959	up
MSTRG.53059.1	0.101815	0.21448	0.00639987	1.19412	up
MSTRG.53345.2	0.0395757	0.228884	0.0117823	1.85358	up
MSTRG.53370.3	0.25239	0.749807	0.00102578	1.60496	up
MSTRG.53846.5	0.010903	0.0882825	0.00332565	2.25371	up
MSTRG.54298.16	6.4e-05	0.066596	0.0334153	1.85737	up
MSTRG.54564.1	0.0399137	0.119409	0.0313123	1.4347	up
MSTRG.55282.1	0.013775	0.429612	0.00177124	2.63124	up
MSTRG.55312.1	0.0884877	0.288627	0.0095812	1.52607	up
MSTRG.55338.39	0	0.502053	7.94e-09	4.73114	up
MSTRG.55338.4	0.0192403	0.207092	0.0321983	1.8585	up
MSTRG.56127.5	0.0353317	0.131085	0.030693	1.58043	up
MSTRG.56209.12	0.00445367	0.143473	0.0049803	2.44734	up
MSTRG.56246.1	0.0120133	0.130016	0.0152373	2.04868	up
MSTRG.56874.4	0	0.204863	4.1e-10	4.76979	up
MSTRG.56875.1	0.311028	0.413794	0.00328508	0.606005	up
MSTRG.56926.34	0.0212413	0.266157	4.74e-10	3.39276	up
MSTRG.56972.4	0.275632	0.515709	0.00374668	1.03956	up
MSTRG.56979.3	0.0787217	0.272468	0.0251787	1.46046	up
MSTRG.57768.1	0.104443	0.209419	0.0201809	1.08055	up
MSTRG.58270.2	0.0166727	0.165909	0.0287288	1.89672	up
MSTRG.58298.1	0.0533597	0.200372	0.00675105	1.55328	up
MSTRG.58374.12	0	0.10976	0.00636796	2.40157	up
MSTRG.58374.18	0.001021	0.0644703	0.00129438	2.76606	up
MSTRG.58500.1	0.0819863	0.225036	0.0404867	1.3139	up
MSTRG.58521.8	0.0228253	0.135542	9.54e-05	2.35177	up
MSTRG.58524.23	0.0202633	0.126748	0.0165842	1.80321	up
MSTRG.58534.1	0.09313	0.162984	0.0485025	0.921398	up
MSTRG.59410.3	0	0.141413	0.0155211	2.12347	up
MSTRG.59672.1	0.227323	0.406896	0.0471754	0.93979	up
MSTRG.60208.2	0	0.134035	0.0230654	1.98733	up
MSTRG.60250.4	0	0.258109	0.023389	1.98233	up
MSTRG.60396.2	0.00246833	0.215137	0.0284425	1.92052	up
MSTRG.61078.2	0.004361	0.124987	3.29e-05	3.32433	up
MSTRG.61768.1	0.077132	0.138477	0.00876004	0.999425	up
MSTRG.61769.1	0.108906	0.195762	0.00714026	0.972946	up
MSTRG.61778.1	0.0940337	0.158044	0.0441589	0.845989	up
MSTRG.62144.6	0.00657467	0.11186	0.0478945	1.74147	up
MSTRG.63097.1	0.0362307	0.140943	0.0131938	1.62789	up
MSTRG.63248.5	0.017683	0.238157	0.0289455	1.91132	up
MSTRG.63782.6	0.102929	1.1421	0.0466392	1.74938	up
MSTRG.63964.2	0.282808	0.592717	0.0131742	1.14475	up
MSTRG.63975.1	2.28674	5.87134	0.0232499	1.36224	up
MSTRG.64439.1	0.117535	0.528251	0.048819	1.5803	up
MSTRG.64620.1	0	0.18578	0.0165017	2.10341	up
MSTRG.64695.5	0.022377	0.147384	0.0119458	2.00698	up
MSTRG.64804.1	0.0446087	0.116807	0.0250168	1.34187	up
MSTRG.65156.30	0.0760087	0.22308	0.00999777	1.45202	up
MSTRG.65308.1	0.005771	0.088298	0.0472587	1.73773	up
MSTRG.65390.1	0.00140733	0.121182	0.000486221	2.92037	up
MSTRG.65397.1	0.0593707	0.245925	0.00303756	1.9011	up
MSTRG.65445.2	0.00226533	0.0492985	0.0107849	2.22264	up
MSTRG.65888.1	0.182543	0.349704	0.0429783	1.03208	up
MSTRG.66071.22	0	0.218326	0.0161167	2.1113	up
MSTRG.66082.2	0	0.254073	0.00986316	2.27054	up
MSTRG.66211.18	0.146842	0.30856	0.04959	1.08839	up
MSTRG.66715.1	0.0330607	0.158533	0.009337	1.80213	up
MSTRG.66909.61	0.0549627	0.403994	0.0097657	2.074	up
MSTRG.67094.1	0.042237	0.140024	0.018656	1.43411	up
MSTRG.67187.23	0.00293233	0.118886	0.0204316	2.04094	up
MSTRG.67244.54	0.0131487	0.277838	0.0336058	1.87063	up
MSTRG.67416.1	0.0745193	0.183838	0.0174372	1.32266	up
MSTRG.67618.5	0.0128943	0.200628	0.037273	1.81635	up
MSTRG.67640.11	5.66667e-05	0.228731	1.74e-22	6.45026	up
MSTRG.71762.2	0.190972	0.334285	0.0173176	0.933968	up
MSTRG.72425.1	0.0233013	0.301521	0.000848705	2.53702	up
MSTRG.72805.1	0.05696	0.156515	0.0437587	1.33284	up
MSTRG.73351.1	0.0550317	0.19171	0.000438361	1.74344	up
MSTRG.7376.2	0	0.226131	5.03e-06	3.83167	up
MSTRG.73853.29	0.0307903	0.241048	0.0247856	1.89808	up
MSTRG.73855.1	0.285009	0.620972	0.0298612	1.09734	up
MSTRG.73863.1	0.651141	1.16371	0.00978585	0.987263	up
MSTRG.73907.1	0.221739	0.549851	0.047134	1.24288	up
MSTRG.74004.3	0.145876	0.350353	0.00725383	1.3036	up
MSTRG.74069.8	0.0585183	0.232156	0.021848	1.6544	up
MSTRG.74084.27	0.0853767	0.184259	0.0152863	1.16479	up
MSTRG.74416.3	0.043574	0.162772	0.000337784	1.85551	up
MSTRG.7487.4	0	0.0653123	0.0183184	2.06945	up
MSTRG.75004.21	0.028815	0.211717	0.042638	1.74303	up
MSTRG.7510.4	0.005051	0.207033	1.32e-10	4.04039	up
MSTRG.75297.64	0.0288027	0.0676487	0.00902664	1.28139	up
MSTRG.76292.11	0	3.06426	0.042656	1.75598	up
MSTRG.76725.9	0	0.296059	0.0101649	2.2617	up
MSTRG.76933.11	0.0584487	0.248568	0.0323704	1.64226	up
MSTRG.77087.1	0.107127	0.220351	0.0192234	1.11464	up
MSTRG.77098.1	0.128652	0.345486	0.00116311	1.49077	up
MSTRG.77850.13	0.0220937	0.270728	0.00236786	2.48676	up
MSTRG.77999.2	0	0.211974	0.012798	2.18861	up
MSTRG.80113.1	0.170847	0.275238	0.00469048	0.850114	up
MSTRG.80614.1	0.0916877	0.207138	0.0219801	1.18059	up
MSTRG.80736.1	0.106584	0.182198	0.04532	0.881341	up
MSTRG.81.6	0.000421333	0.054559	0.000743882	2.87843	up
MSTRG.81292.4	0.0216953	0.198403	0.00967343	2.07445	up
MSTRG.81672.1	0.117537	0.173054	0.0026973	0.73009	up
MSTRG.81720.1	0.134627	0.222291	0.00876395	0.855806	up
MSTRG.82509.2	0.104902	0.218918	0.0479757	1.07835	up
MSTRG.82615.2	0	0.229269	0.00615671	2.41153	up
MSTRG.82702.39	0.116833	0.253267	0.0331107	1.16783	up
MSTRG.82779.1	0.044345	0.309152	0.00307934	2.19654	up
MSTRG.82949.27	0.0347223	0.219697	0.00502891	2.07593	up
MSTRG.82987.2	0	0.0512022	0.00497765	2.47074	up
MSTRG.83076.1	0.0333903	0.135099	0.0489254	1.52678	up
MSTRG.83296.7	0.0166403	0.719581	9.08e-16	4.76763	up
MSTRG.83353.2	0.000169667	0.160085	0.0127643	2.18581	up
MSTRG.84442.26	0.0130847	0.164136	0.0123907	2.15211	up
MSTRG.84519.24	0	0.949815	0.046468	1.72159	up
MSTRG.85910.4	1.38929	5.07734	0.0180442	1.66802	up
MSTRG.86020.1	0.0821283	0.2003	0.0453063	1.21947	up
MSTRG.86106.159	0.222777	0.402726	0.0140413	0.988571	up
MSTRG.86190.2	0.180243	0.44536	0.0113275	1.34081	up
MSTRG.86284.1	0.138322	0.196271	0.00379802	0.673754	up
MSTRG.86315.3	0.008585	0.09514	0.0216977	1.95715	up
MSTRG.86948.2	0	0.095849	0.00986361	2.2699	up
MSTRG.86971.25	0.286605	0.427321	0.00653646	0.758487	up
MSTRG.86976.1	0.0571747	0.10955	0.0479653	1.00025	up
MSTRG.87119.1	0.235842	0.412792	0.0361437	0.922667	up
MSTRG.8742.38	0.067688	0.372856	0.0191769	1.85576	up
MSTRG.88894.4	0.0968213	0.266987	0.0367711	1.35651	up
MSTRG.89303.44	0	0.238133	0.0345977	1.83747	up
MSTRG.89495.2	0.036022	0.142617	0.00112321	1.81749	up
MSTRG.89868.5	0	0.164751	5.96e-21	6.5222	up
MSTRG.89989.31	0	0.155095	0.0219682	2.00565	up
MSTRG.90552.1	0.0540877	0.222921	0.00125435	1.80145	up
MSTRG.91046.28	0.000271667	0.105219	0.0103049	2.25699	up
MSTRG.91046.31	8e-06	0.153561	0.0103667	2.25385	up
MSTRG.9220.3	0	0.14395	0.00618095	2.41056	up
MSTRG.92221.8	0	0.09934	1.64e-05	3.69526	up
MSTRG.92482.1	0.0686837	0.168524	0.0223921	1.30372	up
MSTRG.92780.9	0.052055	0.241567	0.0496415	1.60314	up
MSTRG.92790.1	0.147325	0.335284	0.0461179	1.16872	up
MSTRG.92813.3	0	0.220365	0.00619746	2.40966	up
MSTRG.92989.26	0	0.159615	0.0138243	2.16239	up
MSTRG.92989.44	0	0.0855903	0.00538263	2.45019	up
MSTRG.92989.46	0	0.308301	0.0415905	1.76653	up
MSTRG.93134.1	0.020191	0.182466	0.0355514	1.81794	up
MSTRG.93756.4	0.00779367	0.0986627	0.0293244	1.90285	up
MSTRG.93939.1	0.0784963	0.118232	0.0311847	0.737658	up
MSTRG.94558.10	0.163279	1.21498	0.0382994	1.78443	up
MSTRG.94633.68	0.274003	0.592022	0.000312045	1.25493	up
MSTRG.94637.1	0.117783	0.230957	0.0209721	1.08295	up
MSTRG.94639.1	0.130742	0.295298	0.0343664	1.20913	up
MSTRG.94641.1	0.104859	0.244956	0.0011173	1.31511	up
MSTRG.94642.1	0.157137	0.276335	0.0379961	0.934789	up
MSTRG.94643.1	0.19378	0.312935	0.0248883	0.834359	up
MSTRG.95662.1	0.0417787	0.174298	0.0284005	1.65495	up
MSTRG.95728.22	0.017793	0.0987258	0.0260674	1.72178	up
MSTRG.96061.37	0	0.524712	0.00127142	2.83221	up
MSTRG.97521.1	0.203294	0.292354	0.0177155	0.714077	up
MSTRG.97766.2	0.127081	0.251997	0.0272947	1.05503	up
MSTRG.97852.1	0	0.1219	0.00476738	2.48293	up
MSTRG.97954.1	0.007666	0.515474	0.0170651	2.1	up
MSTRG.98034.1	0.151819	0.293726	0.000152726	1.11466	up
MSTRG.98291.5	0	0.473255	3.16e-05	3.59818	up
MSTRG.98418.1	1.5537	3.98179	0.0271952	1.32147	up
MSTRG.98553.2	0.20934	0.556488	0.0449238	1.34227	up
MSTRG.98656.3	2.2e-05	1.90198	0.00688167	2.37893	up
MSTRG.99245.1	0.0679263	0.220272	0.0148492	1.52181	up
MSTRG.99904.20	0.00207233	0.11297	0.0327187	1.87403	up

## Sheet: Supplementary Table S2f
Table S2f Significanly differential expressed lncRNAs between uninfected and susceptible birds
Gene	N_FPKM	S_FPKM	Pvalue	log2FC	Direction
AADAC	2.14987	0.878968	0.00864385	-0.681892	down
ADCY1	0.931625	0.562956	0.0040692	-0.617272	down
AMER3	1.83327	1.03593	0.000850984	-0.686425	down
ANGPT1	2.18196	1.12137	0.0124409	-0.646905	down
ANGPTL4	11.7614	5.86499	0.0128684	-0.649434	down
ANKRD1	25.9789	11.5647	0.0152391	-0.602217	down
ANKRD2	10.6124	6.08078	0.00624442	-0.685658	down
ANKRD31	1.61526	0.956068	0.00545015	-0.685945	down
ATXN10	4.04936	3.24715	4.39e-05	-0.60487	down
CAPN14	5.10491	3.07748	0.000605204	-0.676676	down
CDCA7L	3.18351	1.93478	0.00667558	-0.63885	down
CFAP20	14.1699	1.11101	6.65e-13	-1.8787	down
CLGN	0.464918	0.226605	0.0143193	-0.638029	down
CLIC6	1.64016	0.681168	0.00711036	-0.703349	down
CLK1	4.85792	2.48184	1.26e-05	-0.721349	down
CMPK2	1.85332	0.885822	0.00752645	-0.658015	down
COL6A6	3.33519	1.05264	0.0026624	-0.786185	down
CSMD2	0.341962	0.177702	0.0186928	-0.58812	down
CUNH1orf43	7.11115	3.22556	0.000965095	-0.700955	down
CUNH1orf74	20.3757	6.27268	8.68e-05	-1.0037	down
CUNH9orf78	6.82867	3.25243	0.00811457	-0.659653	down
CUNH9orf85	2.62246	1.08547	0.00398694	-0.696418	down
DHODH	8.70386	4.78184	0.00370587	-0.747523	down
DNAJC14	10.4686	6.11075	0.00907431	-0.5958	down
EPSTI1	1.23747	0.312547	0.000608366	-0.887004	down
FAIM2	1.83853	0.653294	4.02e-05	-1.02995	down
FAM76A	5.93355	1.99123	3.4e-11	-1.41028	down
G6PC2	1.44797	0.746657	0.00745462	-0.635648	down
GHDC	1.50178	0.702886	0.000824387	-0.778988	down
HAP1	0.824366	0.405409	0.0179772	-0.593464	down
HR	3.45764	1.48674	0.00429906	-0.744964	down
HSPBAP1	1.89262	1.19729	0.00184541	-0.64743	down
IL18BP	6.15972	1.18794	0.00212898	-0.7717	down
JCHAIN	6.04488	1.3194	0.00831629	-0.632272	down
KCNQ1	6.14786	4.615	0.00202197	-0.680279	down
KIF27	2.98791	1.35051	0.0106784	-0.660719	down
LOC102084708	4.06668	1.00845	2.65e-05	-1.09283	down
LOC102085381	3.09343	1.42041	0.000284521	-0.766674	down
LOC102086111	1.26184	0.517168	0.0150312	-0.635229	down
LOC102086122	16.3534	5.29101	0.000564804	-0.894096	down
LOC102087124	3.20629	1.45048	0.00146238	-0.799445	down
LOC102087128	6.6251	3.49442	0.00944951	-0.618764	down
LOC102087220	0.455495	0.176018	0.0163204	-0.614823	down
LOC102087368	12.6802	7.04596	1.19e-06	-0.789811	down
LOC102087856	19.658	8.73559	0.00202386	-0.760901	down
LOC102089036	0.351469	0.083005	0.000982832	-0.860055	down
LOC102090149	1.16827	0.596458	0.00847551	-0.636951	down
LOC102090444	9.20188	2.33837	0.00329003	-0.75276	down
LOC102090498	5.24664	2.75499	1.52e-09	-0.840717	down
LOC102091110	2.76168	1.53394	0.00624168	-0.633568	down
LOC102091391	8.96314	3.49383	0.00550839	-0.722395	down
LOC102092918	5.17252	1.88741	0.00618412	-0.715122	down
LOC102094944	1.38534	0.519011	0.00520598	-0.731185	down
LOC102095284	12.4149	3.13505	0.00151505	-0.818048	down
LOC102095562	15.8279	6.25941	0.023533	-0.5915	down
LOC102096675	1.35572	0.617752	0.00550847	-0.714555	down
LOC102097467	5.83727	2.91714	0.00696381	-0.612244	down
LOC102098481	4.06526	1.21688	0.00494386	-0.725302	down
LOC102098485	8.87987	4.66924	0.00592713	-0.637728	down
LOC106145754	56.9395	28.1818	0.0222384	-0.585317	down
LOC106146053	1.25035	0.521444	0.0122509	-0.639594	down
LOC110362038	6.52277	0.548469	0.00447344	-0.601878	down
LOC110363298	0.847885	0.44759	0.00106582	-0.722986	down
LRRC28	4.97725	2.30406	0.000280745	-0.821478	down
LRRC38	2.45799	1.07237	0.00769983	-0.697416	down
LRRC72	1.03388	0.762187	0.00429615	-0.674012	down
MCF2L	11.8629	6.4089	0.00017964	-0.655561	down
MCOLN3	0.834832	0.322153	0.0140781	-0.642372	down
MTUS2	1.1945	0.751775	0.00231105	-0.689025	down
MYBL1	1.38214	0.812571	0.0244619	-0.588691	down
NECAB3	0.520476	0.22102	0.016693	-0.624308	down
NELL2	4.35738	2.0677	0.00106857	-0.764682	down
NFKBIE	6.1175	3.17169	4.93e-05	-0.729674	down
PPP1R36	4.60334	2.04147	0.0199276	-0.597572	down
PTPRR	0.37161	0.158285	0.0132119	-0.64593	down
PYCR3	3.36486	1.85694	0.00558655	-0.598833	down
RAB37	4.1964	1.92326	0.0170059	-0.621773	down
RGS9	4.03269	2.2805	0.0012008	-0.700941	down
RNF135	2.48301	1.45966	0.000351702	-0.671343	down
RSAD2	1.25976	0.475096	5.58e-05	-1.00153	down
SEMA6C	1.30725	0.301784	0.0124995	-0.624691	down
SHC3	1.12298	0.313967	0.0147782	-0.617257	down
STARD5	2.44083	1.32876	0.011462	-0.593909	down
SULT4A1	1.42843	0.873742	0.00069691	-0.767639	down
SUSD3	4.31519	2.26241	0.00295268	-0.671735	down
TECTA	1.12912	0.462936	0.000908384	-0.769517	down
TEPSIN	1.96267	1.04306	0.00849279	-0.605702	down
TMED5	15.5882	2.88594	3.44e-05	-1.08285	down
TMEM171	1.05287	0.462527	0.0131901	-0.635105	down
TMEM60	1.25018	0.52907	4.63e-06	-0.961973	down
TNFRSF4	1.34862	0.573465	0.00914282	-0.681519	down
TRADD	1.46197	1.40627	0.0228312	-0.585506	down
TRIM65	1.40187	0.570715	0.00546002	-0.705058	down
TRPM6	0.133583	0.0611505	0.0109686	-0.650399	down
UNG	2.94338	1.31756	0.0100287	-0.63656	down
USP18	5.69394	2.44893	7.08e-09	-1.15237	down
ZDHHC12	9.71637	3.72246	0.0026389	-0.777436	down
Columba_livia_newGene_764	0.716083	0.330976	0.0221423	-0.590343	down
Columba_livia_newGene_776	1.05887	0.602412	0.00372327	-0.693302	down
Columba_livia_newGene_5204	0.725739	0.306	1.87e-05	-0.983916	down
Columba_livia_newGene_5206	0.216019	0.0774072	0.000214967	-0.92561	down
Columba_livia_newGene_6460	1.28384	0.801144	2.66e-07	-0.966501	down
Columba_livia_newGene_6974	0.279668	0.108972	0.0147889	-0.637227	down
Columba_livia_newGene_9544	0.355058	0.223196	0.0107236	-0.654379	down
Columba_livia_newGene_11347	0.65285	0.262112	0.00816918	-0.692154	down
Columba_livia_newGene_11624	0.864119	0.307731	1.2e-05	-0.953538	down
Columba_livia_newGene_11684	1.23738	0.565739	5.46e-05	-0.865679	down
Columba_livia_newGene_12224	0.374515	0.22972	0.0218155	-0.585998	down
Columba_livia_newGene_12862	0.202077	0.0901465	0.00361315	-0.728033	down
Columba_livia_newGene_15973	1.13161	0.572162	0.00827697	-0.648366	down
Columba_livia_newGene_21389	0.549365	0.252678	0.0053983	-0.680198	down
Columba_livia_newGene_22465	1.16381	0.495841	0.0149103	-0.630511	down
Columba_livia_newGene_23141	0.921918	0.498706	0.00847153	-0.686702	down
Columba_livia_newGene_23303	4.41889	2.26389	0.0123241	-0.644097	down
Columba_livia_newGene_27475	0.756087	0.380915	0.00376083	-0.692431	down
Columba_livia_newGene_28139	19.0823	9.52132	0.0110037	-0.63939	down
Columba_livia_newGene_28339	1.45649	0.693905	0.00104283	-0.718003	down
Columba_livia_newGene_29545	0.852376	0.429203	0.0171861	-0.618595	down
Columba_livia_newGene_29758	0.777682	0.343233	0.0228201	-0.59514	down
Columba_livia_newGene_32308	0.847145	0.587303	0.000827783	-0.688928	down
Columba_livia_newGene_32887	1.67342	0.704503	0.00147948	-0.759689	down
Columba_livia_newGene_32902	1.16365	0.418542	0.00766714	-0.697016	down
Columba_livia_newGene_33761	0.381769	0.084953	0.00315006	-0.738918	down
Columba_livia_newGene_33762	0.681501	0.279019	0.0181896	-0.615691	down
Columba_livia_newGene_34576	0.431682	0.173114	0.0022457	-0.794017	down
Columba_livia_newGene_34636	0.912447	0.337811	0.002649	-0.780982	down
Columba_livia_newGene_34973	1.11843	0.530141	0.0124593	-0.653808	down
Columba_livia_newGene_40990	4.39053	2.06777	5.86e-05	-0.792122	down
Columba_livia_newGene_43978	0.895566	0.39374	0.00116971	-0.714097	down
Columba_livia_newGene_44466	0.674122	0.188369	0.00268045	-0.777287	down
Columba_livia_newGene_45640	6.2824	1.53959	0.00922837	-0.638458	down
Columba_livia_newGene_46345	0.757847	0.348874	0.00704849	-0.679456	down
Columba_livia_newGene_47212	0.400802	0.189029	0.0218094	-0.59793	down
Columba_livia_newGene_47376	0.786866	0.489048	0.0113233	-0.619407	down
Columba_livia_newGene_47497	1.30297	0.627927	0.00328828	-0.722194	down
Columba_livia_newGene_49495	1.16139	0.519832	0.0126856	-0.652029	down
Columba_livia_newGene_55558	0.83606	0.582315	0.00629308	-0.666676	down
Columba_livia_newGene_56742	1.3384	0.685258	0.00165074	-0.6921	down
Columba_livia_newGene_56872	0.309222	0.108645	0.00523601	-0.721921	down
Columba_livia_newGene_57104	0.677674	0.311032	0.00838287	-0.671064	down
Columba_livia_newGene_61357	1.65179	0.57456	0.00023929	-0.941051	down
Columba_livia_newGene_62607	1.18898	0.538629	3.8e-05	-1.05763	down
Columba_livia_newGene_66591	0.805636	0.365743	0.00489306	-0.705885	down
Columba_livia_newGene_68442	89.8909	18.352	1.04e-05	-1.15352	down
Columba_livia_newGene_69212	10.7635	3.73436	0.0137479	-0.638404	down
Columba_livia_newGene_69894	1.18243	0.266369	0.00956689	-0.642507	down
Columba_livia_newGene_69899	0.303077	0.0973752	0.00294046	-0.777969	down
Columba_livia_newGene_70737	2.54915	1.4024	0.00104966	-0.681698	down
Columba_livia_newGene_70738	0.583849	0.252401	0.00902703	-0.676794	down
Columba_livia_newGene_71368	1.10179	0.53723	0.0112716	-0.657179	down
Columba_livia_newGene_71507	7.67368	4.40075	0.00283048	-0.640006	down
Columba_livia_newGene_71999	0.223517	0.073604	0.0107745	-0.660665	down
Columba_livia_newGene_72814	0.34442	0.167437	0.00655158	-0.65347	down
Columba_livia_newGene_75532	2.1192	0	5.28e-20	-2.3639	down
Columba_livia_newGene_76246	0.18776	0.0330555	7.53e-06	-1.17075	down
Columba_livia_newGene_78293	6.58345	3.82504	0.0138616	-0.601427	down
Columba_livia_newGene_79733	3.03054	1.8895	0.00690551	-0.589417	down
Columba_livia_newGene_83347	0.997088	0.25135	0.0037352	-0.750349	down
Columba_livia_newGene_84744	0.373871	0.101862	0.00502597	-0.721982	down
Columba_livia_newGene_84839	1.35749	0.513649	0.00975598	-0.633283	down
Columba_livia_newGene_85626	6.15496	2.51016	0.00862754	-0.684691	down
Columba_livia_newGene_86145	0.89197	0.442211	0.000907983	-0.830551	down
Columba_livia_newGene_88338	37.7957	2.80679	9.33e-05	-0.943828	down
Columba_livia_newGene_89161	0.853144	0.323631	0.000246334	-0.912285	down
Columba_livia_newGene_90074	0.440684	0.132769	0.00467794	-0.731816	down
Columba_livia_newGene_90670	2.81839	0.711284	0.0101069	-0.603025	down
Columba_livia_newGene_91007	1.3541	0.798325	0.00446706	-0.740187	down
Columba_livia_newGene_91240	0.359902	0.118684	0.00416443	-0.749208	down
Columba_livia_newGene_92848	0.572703	0.261252	0.010476	-0.669818	down
Columba_livia_newGene_92850	0.378449	0.140191	0.011308	-0.661699	down
Columba_livia_newGene_93776	1.26958	0.830164	0.00467545	-0.740001	down
ACAN	113.106	195.154	0.00661785	0.616606	up
ANAPC13	5.90207	10.8237	0.003177	0.671134	up
APOB	0.043694	0.575837	0.00589694	0.629103	up
BMP6	2.37678	2.9931	0.0128615	0.613609	up
BPI	8.11027	34.7955	0.0115073	0.615887	up
C3	3.76029	13.7059	0.0140423	0.616749	up
C7	2.52206	8.35036	0.0189813	0.600228	up
CA3	5.34699	12.4615	0.0134296	0.646716	up
CDR2	1.67847	2.90887	0.000135436	0.683528	up
CNR1	1.72675	2.77727	0.00322539	0.616614	up
COL12A1	68.6284	121.331	0.000973592	0.708665	up
COMP	35.5333	98.8482	7.38e-05	0.884724	up
CSNK2A2	21.9529	33.5823	3.51e-09	0.811733	up
CUNH10orf71	1.01281	3.45652	1.61e-05	1.10209	up
CUNH11orf87	0.669158	1.35103	0.0100567	0.649648	up
DHX37	2.74842	5.7962	0.00417019	0.727967	up
DNAH5	0.239225	0.715453	0.00603851	0.717988	up
EIF4H	7.00301	17.6172	0.000105904	0.981681	up
ELP6	1.83628	4.20593	0.00214483	0.733466	up
F5	6.32362	11.9739	0.00417855	0.637358	up
FAM212B	1.40715	4.47455	0.00570909	0.704717	up
FGA	0.11035	1.4778	0.00345762	0.65706	up
FGF2	1.73097	3.55892	2.95e-16	1.27397	up
FGG	0.441895	2.15122	0.00793562	0.646402	up
FLVCR1	1.78431	3.2834	0.00731065	0.634247	up
FN1	192.802	322.449	0.00871904	0.585395	up
FOXRED2	2.34883	3.8731	0.0036122	0.59918	up
GCNT4	0.795569	1.95994	0.0229287	0.58757	up
GTF3A	1.96326	4.89679	5.89e-07	0.760351	up
GTPBP10	3.39038	5.23795	0.00178183	0.761696	up
GZF1	0.424098	1.62575	0.00122264	0.838992	up
HEMK1	2.50104	3.25707	0.0067091	0.706663	up
HSPA8	132.386	215.457	0.00567812	0.586679	up
ISOC1	2.24087	5.56851	0.0240932	0.58668	up
ITIH2	0.147933	1.7195	0.00015335	0.944545	up
JMJD6	4.51523	9.27346	0.00959828	0.619124	up
KCNJ3	0.0673067	0.179813	0.00996122	0.674036	up
KLHDC10	1.06949	2.11276	0.00722751	0.602985	up
LACTBL1	1.92913	5.56121	0.0101531	0.670796	up
LOC102084914	0.142206	0.505996	0.00141815	0.803	up
LOC102087931	0.272607	0.719212	0.00088313	0.865988	up
LOC102089105	22.6769	90.0644	0.00245946	0.781122	up
LOC102091695	0.541643	3.03881	7.58e-08	1.39184	up
LOC102091826	1.45728	3.79472	1.99e-05	0.999889	up
LOC102092429	0.976521	1.77124	0.0127044	0.608878	up
LOC102092663	8.64245	14.701	0.00018765	0.625826	up
LOC102093527	1.13624	2.03064	0.0142025	0.619913	up
LOC102095035	3.62114	5.69829	5.6e-06	0.639899	up
LOC102095930	2.95332	5.39761	0.010124	0.627721	up
LOC102097477	0.492653	1.05378	0.015877	0.631004	up
LOC102098885	9.47402	20.2154	0.00230664	0.700655	up
LOC106145902	2.26651	4.46841	3.81e-05	0.810096	up
LONRF1	1.61021	2.7589	0.00253294	0.660546	up
LONRF3	10.4254	17.2433	0.00394292	0.602957	up
LYVE1	7.13303	11.3981	0.000493366	0.622958	up
MMRN1	13.1055	25.0694	0.000656944	0.751338	up
MMRN2	10.766	16.4496	0.000111171	0.61217	up
MSN	12.1841	30.2185	0.003105	0.64198	up
NACA	9.17853	65.5666	0.00198248	0.755231	up
NCS1	1.14412	1.97664	0.0047158	0.63228	up
OTUD1	13.8815	27.9474	0.000113474	0.82921	up
P2RY2	20.455	47.3098	6.06e-05	0.692815	up
PARVA	5.23978	8.63609	0.00401428	0.614339	up
PEX2	2.89029	6.48657	5.49e-05	0.75046	up
PRG4	1.16528	3.61044	2.89e-07	1.18852	up
PTEN	15.2074	10.0338	7.1e-05	0.672498	up
RHOQ	2.95239	20.9335	1.91e-06	1.12836	up
RIOX1	5.70865	8.98513	0.000688872	0.599465	up
SDF4	7.49274	23.0449	0.00970488	0.637265	up
SERINC5	2.38719	7.42972	0.0152347	0.634451	up
SFMBT1	0.812771	1.21404	0.000387737	0.732288	up
SLC1A7	1.88068	4.01702	0.00705304	0.67934	up
SLC26A11	0.89111	1.63403	9.18e-05	0.930198	up
SLC5A3	1.53974	2.96329	0.000116541	0.783468	up
SLC6A17	0.337036	0.817364	0.00300144	0.744276	up
SMAD4	3.82006	5.39281	0.0115244	0.613971	up
SOCS6	1.01089	1.94401	4.18e-05	0.73961	up
SPRED1	3.35452	4.35569	0.00101839	0.618447	up
SREBF2	14.9785	25.1105	0.00942793	0.593658	up
SYNM	2.09444	4.37125	0.0237997	0.591331	up
TMEM42	1.14818	4.49109	0.000159048	0.988083	up
TNFAIP6	3.02697	5.89301	0.00542103	0.595621	up
TOB2	13.8869	21.8876	0.000272755	0.61441	up
VASH1	7.43123	9.83919	0.0122159	0.618845	up
YWHAG	2.85657	6.93253	0.00369327	0.750213	up
ZBTB14	0.6724	1.9323	0.0122668	0.6554	up
ZHX1	2.19563	6.74301	0.000714687	0.881156	up
ZNF639	5.38134	8.64726	0.00340462	0.731714	up
Columba_livia_newGene_7458	0.248296	0.486707	0.00957374	0.66689	up
Columba_livia_newGene_10482	0.179803	0.44941	0.0101883	0.672418	up
Columba_livia_newGene_11266	4.62746	8.89442	0.00334082	0.63167	up
Columba_livia_newGene_15903	12.9317	20.4057	0.00387815	0.622363	up
Columba_livia_newGene_20414	0.315885	0.789311	0.00531568	0.726452	up
Columba_livia_newGene_23359	1.41219	2.46538	0.00975129	0.674971	up
Columba_livia_newGene_32276	0.212443	0.453191	0.0193101	0.607773	up
Columba_livia_newGene_35543	2.70295	7.43281	0.00892491	0.679386	up
Columba_livia_newGene_38505	0.108434	0.341157	0.0167416	0.625009	up
Columba_livia_newGene_39315	11.3897	43.6922	0.00526888	0.712825	up
Columba_livia_newGene_39853	0	1.05587	9.3e-75	4.50067	up
Columba_livia_newGene_39986	0.213685	1.99996	0.010136	0.586538	up
Columba_livia_newGene_43817	0.134384	0.335157	0.00942414	0.679207	up
Columba_livia_newGene_45668	0.113884	0.262992	0.014787	0.636694	up
Columba_livia_newGene_47418	0.134494	1.65201	0.000183156	0.903455	up
Columba_livia_newGene_51430	0.741417	2.21023	0.00490073	0.731519	up
Columba_livia_newGene_53229	0.383528	1.14089	0.000447342	0.916962	up
Columba_livia_newGene_58758	0.651442	0.530185	0.00179572	0.790771	up
Columba_livia_newGene_59167	1.81262	5.30951	0.000221781	0.943225	up
Columba_livia_newGene_62017	1.89435	2.37901	0.0169804	0.615476	up
Columba_livia_newGene_62223	0.10109	0.211111	0.0223044	0.595195	up
Columba_livia_newGene_65090	0.297884	0.55615	0.00627148	0.65327	up
Columba_livia_newGene_69418	0.077132	0.194016	0.0198604	0.604985	up
Columba_livia_newGene_79021	0.121445	3.21757	0.0078593	0.612807	up
Columba_livia_newGene_79516	0.629312	1.72664	0.0121973	0.649676	up
Columba_livia_newGene_93396	1.5537	3.98179	0.0217242	0.597308	up
