# Supplementary material for: Transcriptome Analysis Revealed Potential Mechanisms of Resistance to Trichomoniasis gallinae Infection in Pigeon (Columba livia)
Source: Front Vet Sci. 2021 Sep 14;8:672270. doi: 10.3389/fvets.2021.672270 (PMC8477972; doi:10.3389/fvets.2021.672270)
Supplement: Supplementary Table 3 — The cis/trans target genes of differential expressed (DE) lncRNA among control (N), susceptible (S), and tolerant (T) pigeons. The protein-coding genes within 100 k upstream and downstream of DE-lncRNA with in N vs. S birds (a), with in N vs. T birds (c) and with in S vs. T birds (e). The predicted target genes of DE-lncRNA by trans in N vs. S birds (b), N vs. T birds (d) and S vs. T birds (f). [file Table_3.XLSX]

## Sheet: Supplementary Table S4
Significant gene ontology (GO) terms for cis/trans target genes of DE-lncRNAs
Contrast	Catergory	Go term	Involved genes	P value
N vs. S	CC	GO:0005882~intermediate filament	LOC102095054, LOC106145648, LOC106145951, LOC106145731, LOC106146048, LOC102098194, LOC102098074, LOC102084714, LOC102097844, LOC102095423, LOC102098020, LOC106146042, LOC102098374, LOC102097644, LOC106146040, LOC106146041, LOC102089778, BFSP1, LOC102097818, LOC102085779, LOC106145919, LOC102086142	0.001
	MF	GO:0005200~structural constituent of cytoskeleton	LOC102095054, LOC106145648, LOC106145951, LOC106145731, LOC106146048, LOC102098194, LOC102098074, LOC102084714, LOC102097844, LOC102095423, LOC102098020, LOC106146042, LOC102098374, LOC102097644, LOC106146040, LOC106146041, LOC102089778, LOC102097818, LOC102085779, LOC106145919, LOC102086142	0.003
N vs. T	MF	GO:0004930~G-protein coupled receptor activity	LOC102084353, OPN2SW, LOC102097063, OPNP, LOC102096107, LOC102084162, MCHR2, LOC102096894	0.02
S vs. T	CC	GO:0000786~nucleosome	LOC102093716, LOC102093539, LOC102092985, LOC102094999, LOC102092443, LOC102093168, LOC102092258, LOC102093897, LOC102094275, LOC102094088	0.0001
	CC	GO:0005634~nucleus	LOC102092443, LOC102093168, PAX6, LOC102092258, LOC102093897, NR2E3, LOC102094275, LOC102094088, LOC102093716, LOC102093539, TEF, LOC102092985, LOC102094999, HMGN2	0.04
	CC	GO:0005882~intermediate filament	LOC106145648, LOC106145951, LOC106145731, LOC106146048, LOC102098194, LOC102098074, LOC102084714, LOC102095423, LOC102098020, LOC106146042, LOC102098374, LOC102097644, LOC106146040, LOC106146041, LOC102089778, BFSP1, LOC102097818, LOC106145919	0.01
	MF	GO:0003677~DNA binding	LOC102093716, LOC102093539, LOC102092985, TOP1MT, LOC102094999, LOC102092443, LOC102093168, LOC102092258, POLR3H, LOC102093897, LOC102094275, LOC102094088	0.005
	MF	GO:0005200~structural constituent of cytoskeleton	LOC106145648, LOC106145951, LOC106145731, LOC106146048, LOC102098194, LOC102098074, LOC102084714, LOC102095423, LOC102098020, LOC106146042, LOC102098374, LOC102097644, LOC106146040, LOC106146041, LOC102089778, LOC102097818, LOC106145919	0.02
