# Supplementary material for: Transcriptome Analysis Revealed Potential Mechanisms of Resistance to Trichomoniasis gallinae Infection in Pigeon (Columba livia)
Source: Front Vet Sci. 2021 Sep 14;8:672270. doi: 10.3389/fvets.2021.672270 (PMC8477972; doi:10.3389/fvets.2021.672270)
Supplement: Supplementary Table 4 — Significant gene ontology (GO) terms for cis/trans target genes of DE-lncRNAs. [file Table_4.XLSX]

## Sheet: Supplementary S5a
Table S5a Co-expressed pairs of DE-lncRNA and DEG for N vs. S birds
LncRNA	LncRNA_Pvalue	LncRNA_log2FC	LncRNA_direction	Gene	Gene_Pvalue	Gene_log2FC	Gene_direction
MSTRG.25745.28	2.82e-37	-8.19747	down	Columba_livia_newGene_40990	5.86e-05	-0.792122	down
MSTRG.25745.28	2.82e-37	-8.19747	down	Columba_livia_newGene_71999	0.0107745	-0.660665	down
MSTRG.25745.28	2.82e-37	-8.19747	down	LOC102087220	0.0163204	-0.614823	down
MSTRG.25745.28	2.82e-37	-8.19747	down	LOC102095562	0.023533	-0.5915	down
MSTRG.99904.19	3.26e-23	-7.25019	down	Columba_livia_newGene_34636	0.002649	-0.780982	down
MSTRG.99904.19	3.26e-23	-7.25019	down	PTPRR	0.0132119	-0.64593	down
MSTRG.67640.11	1.74e-22	6.45026	up	Columba_livia_newGene_32276	0.0193101	0.607773	up
MSTRG.89868.5	5.96e-21	6.5222	up	P2RY2	6.06e-05	0.692815	up
MSTRG.38173.2	5.7e-20	6.39223	up	LOC102084708	2.65e-05	-1.09283	down
MSTRG.15473.38	6.14e-17	-6.53564	down	Columba_livia_newGene_85626	0.00862754	-0.684691	down
MSTRG.68052.50	4.37e-16	-6.38823	down	Columba_livia_newGene_11624	1.2e-05	-0.953538	down
MSTRG.68052.50	4.37e-16	-6.38823	down	JCHAIN	0.00831629	-0.632272	down
MSTRG.68052.50	4.37e-16	-6.38823	down	LOC102087220	0.0163204	-0.614823	down
MSTRG.68052.50	4.37e-16	-6.38823	down	LOC102091110	0.00624168	-0.633568	down
MSTRG.83296.7	9.08e-16	4.76763	up	RHOQ	1.91e-06	1.12836	up
MSTRG.61406.8	7.71e-15	-6.21461	down	Columba_livia_newGene_40990	5.86e-05	-0.792122	down
MSTRG.61406.8	7.71e-15	-6.21461	down	Columba_livia_newGene_71999	0.0107745	-0.660665	down
MSTRG.20693.2	1e-14	5.86981	up	NACA	0.00198248	0.755231	up
MSTRG.18728.2	8.24e-12	4.40849	up	LOC102091695	7.58e-08	1.39184	up
MSTRG.76805.15	8.29e-12	-5.35369	down	Columba_livia_newGene_46345	0.00704849	-0.679456	down
MSTRG.51778.37	1.27e-11	4.79638	up	Columba_livia_newGene_43817	0.00942414	0.679207	up
MSTRG.51778.37	1.27e-11	4.79638	up	Columba_livia_newGene_62223	0.0223044	0.595195	up
MSTRG.51778.37	1.27e-11	4.79638	up	PEX2	5.49e-05	0.75046	up
MSTRG.147297.14	1.89e-11	-5.11902	down	Columba_livia_newGene_5204	1.87e-05	-0.983916	down
MSTRG.147297.14	1.89e-11	-5.11902	down	Columba_livia_newGene_61357	0.00023929	-0.941051	down
MSTRG.147297.14	1.89e-11	-5.11902	down	Columba_livia_newGene_75532	5.28e-20	-2.3639	down
MSTRG.147297.14	1.89e-11	-5.11902	down	LOC102095284	0.00151505	-0.818048	down
MSTRG.147297.14	1.89e-11	-5.11902	down	MCF2L	0.00017964	-0.655561	down
MSTRG.143304.7	2.61e-11	-5.29085	down	MCOLN3	0.0140781	-0.642372	down
MSTRG.114665.14	8.61e-11	5.01942	up	DHX37	0.00417019	0.727967	up
MSTRG.27215.93	9.14e-11	4.89541	up	LOC102095035	5.6e-06	0.639899	up
MSTRG.27215.93	9.14e-11	4.89541	up	OTUD1	0.000113474	0.82921	up
MSTRG.7510.4	1.32e-10	4.04039	up	Columba_livia_newGene_45668	0.014787	0.636694	up
MSTRG.93757.3	2.87e-10	-5.08925	down	CUNH1orf74	8.68e-05	-1.0037	down
MSTRG.56926.34	4.74e-10	3.39276	up	Columba_livia_newGene_39853	9.3e-75	4.50067	up
MSTRG.116433.17	4.96e-10	-4.96608	down	Columba_livia_newGene_71999	0.0107745	-0.660665	down
MSTRG.116433.17	4.96e-10	-4.96608	down	RHOQ	1.91e-06	1.12836	up
MSTRG.49731.14	8.61e-10	4.99072	up	NCS1	0.0047158	0.63228	up
MSTRG.53059.2	4.79e-09	-4.5633	down	Columba_livia_newGene_11624	1.2e-05	-0.953538	down
MSTRG.55653.2	4.93e-09	-4.91828	down	Columba_livia_newGene_56872	0.00523601	-0.721921	down
MSTRG.55653.2	4.93e-09	-4.91828	down	Columba_livia_newGene_6460	2.66e-07	-0.966501	down
MSTRG.153424.14	6.18e-09	-4.61445	down	Columba_livia_newGene_40990	5.86e-05	-0.792122	down
MSTRG.153424.14	6.18e-09	-4.61445	down	LOC102087220	0.0163204	-0.614823	down
MSTRG.55338.39	7.94e-09	4.73114	up	KLHDC10	0.00722751	0.602985	up
MSTRG.55338.39	7.94e-09	4.73114	up	RHOQ	1.91e-06	1.12836	up
MSTRG.94558.4	8.17e-09	-4.08715	down	Columba_livia_newGene_71999	0.0107745	-0.660665	down
MSTRG.116345.11	8.54e-09	-4.70239	down	PTPRR	0.0132119	-0.64593	down
MSTRG.76935.2	1.44e-08	-4.64176	down	LOC102090444	0.00329003	-0.75276	down
MSTRG.153395.5	2.81e-08	4.53328	up	CUNH10orf71	1.61e-05	1.10209	up
MSTRG.24469.1	1.29e-07	-4.23439	down	Columba_livia_newGene_33761	0.00315006	-0.738918	down
MSTRG.24469.1	1.29e-07	-4.23439	down	Columba_livia_newGene_62607	3.8e-05	-1.05763	down
MSTRG.24469.1	1.29e-07	-4.23439	down	Columba_livia_newGene_88338	9.33e-05	-0.943828	down
MSTRG.24469.1	1.29e-07	-4.23439	down	KIF27	0.0106784	-0.660719	down
MSTRG.36087.27	1.5e-07	-4.0638	down	Columba_livia_newGene_71999	0.0107745	-0.660665	down
MSTRG.41962.20	2.3e-07	-4.36546	down	LOC102087124	0.00146238	-0.799445	down
MSTRG.80997.1	3.12e-07	-4.21563	down	LOC102091110	0.00624168	-0.633568	down
MSTRG.80997.1	3.12e-07	-4.21563	down	LOC102098481	0.00494386	-0.725302	down
MSTRG.80997.1	3.12e-07	-4.21563	down	SUSD3	0.00295268	-0.671735	down
MSTRG.140173.19	4.62e-07	-4.08004	down	EPSTI1	0.000608366	-0.887004	down
MSTRG.108238.1	6.05e-07	-1.24416	down	Columba_livia_newGene_5206	0.000214967	-0.92561	down
MSTRG.17527.15	6.45e-07	-4.01286	down	Columba_livia_newGene_11624	1.2e-05	-0.953538	down
MSTRG.85910.2	7.68e-07	-3.98808	down	APOB	0.00589694	0.629103	up
MSTRG.114849.42	1.12e-06	-4.12816	down	Columba_livia_newGene_75532	5.28e-20	-2.3639	down
MSTRG.114849.42	1.12e-06	-4.12816	down	Columba_livia_newGene_88338	9.33e-05	-0.943828	down
MSTRG.114849.42	1.12e-06	-4.12816	down	ANGPT1	0.0124409	-0.646905	down
MSTRG.114849.42	1.12e-06	-4.12816	down	IL18BP	0.00212898	-0.7717	down
MSTRG.114849.42	1.12e-06	-4.12816	down	LOC102096675	0.00550847	-0.714555	down
MSTRG.114849.42	1.12e-06	-4.12816	down	LOC106146053	0.0122509	-0.639594	down
MSTRG.114849.42	1.12e-06	-4.12816	down	PPP1R36	0.0199276	-0.597572	down
MSTRG.82272.3	1.15e-06	-4.0587	down	Columba_livia_newGene_11624	1.2e-05	-0.953538	down
MSTRG.82272.3	1.15e-06	-4.0587	down	JCHAIN	0.00831629	-0.632272	down
MSTRG.82272.3	1.15e-06	-4.0587	down	LOC102087220	0.0163204	-0.614823	down
MSTRG.82272.3	1.15e-06	-4.0587	down	LOC102098481	0.00494386	-0.725302	down
MSTRG.153789.15	1.54e-06	3.83716	up	Columba_livia_newGene_15973	0.00827697	-0.648366	down
MSTRG.140078.13	4.99e-06	3.5516	up	DHX37	0.00417019	0.727967	up
MSTRG.47152.1	8.62e-06	3.73646	up	SLC6A17	0.00300144	0.744276	up
MSTRG.137499.2	1.09e-05	3.05192	up	SLC6A17	0.00300144	0.744276	up
MSTRG.8742.37	1.14e-05	-2.7518	down	Columba_livia_newGene_40990	5.86e-05	-0.792122	down
MSTRG.8742.37	1.14e-05	-2.7518	down	LOC102089036	0.000982832	-0.860055	down
MSTRG.8742.37	1.14e-05	-2.7518	down	LRRC28	0.000280745	-0.821478	down
MSTRG.18907.1	1.53e-05	-3.39738	down	CFAP20	6.65e-13	-1.8787	down
MSTRG.18907.1	1.53e-05	-3.39738	down	TMEM60	4.63e-06	-0.961973	down
MSTRG.61078.2	3.29e-05	3.32433	up	Columba_livia_newGene_32276	0.0193101	0.607773	up
MSTRG.61078.2	3.29e-05	3.32433	up	KCNJ3	0.00996122	0.674036	up
MSTRG.61078.2	3.29e-05	3.32433	up	MMRN1	0.000656944	0.751338	up
MSTRG.149862.3	6.43e-05	3.30149	up	Columba_livia_newGene_39315	0.00526888	0.712825	up
MSTRG.123708.1	6.91e-05	-1.304	down	CFAP20	6.65e-13	-1.8787	down
MSTRG.123708.1	6.91e-05	-1.304	down	CSNK2A2	3.51e-09	0.811733	up
MSTRG.123708.1	6.91e-05	-1.304	down	CUNH1orf43	0.000965095	-0.700955	down
MSTRG.123708.1	6.91e-05	-1.304	down	TMEM60	4.63e-06	-0.961973	down
MSTRG.46310.9	0.000142175	2.79328	up	CA3	0.0134296	0.646716	up
MSTRG.101075.1	0.00016448	-3.27943	down	LOC102090444	0.00329003	-0.75276	down
MSTRG.103771.1	0.00018596	1.0692	up	Columba_livia_newGene_85626	0.00862754	-0.684691	down
MSTRG.103771.1	0.00018596	1.0692	up	UNG	0.0100287	-0.63656	down
MSTRG.82450.3	0.000200319	-1.90955	down	Columba_livia_newGene_11684	5.46e-05	-0.865679	down
MSTRG.82450.3	0.000200319	-1.90955	down	ANKRD1	0.0152391	-0.602217	down
MSTRG.45024.16	0.000200759	-2.30863	down	MCF2L	0.00017964	-0.655561	down
MSTRG.110539.4	0.000225883	-1.288	down	Columba_livia_newGene_61357	0.00023929	-0.941051	down
MSTRG.18269.3	0.000247151	-2.16997	down	Columba_livia_newGene_6460	2.66e-07	-0.966501	down
MSTRG.132501.3	0.000316722	3.1505	up	Columba_livia_newGene_45640	0.00922837	-0.638458	down
MSTRG.82541.15	0.000351025	-0.923405	down	TEPSIN	0.00849279	-0.605702	down
MSTRG.20405.8	0.000395687	-2.72506	down	Columba_livia_newGene_71999	0.0107745	-0.660665	down
MSTRG.73351.1	0.000438361	1.74344	up	FAIM2	4.02e-05	-1.02995	down
MSTRG.118226.1	0.000444759	-1.38734	down	Columba_livia_newGene_83347	0.0037352	-0.750349	down
MSTRG.118226.1	0.000444759	-1.38734	down	Columba_livia_newGene_84744	0.00502597	-0.721982	down
MSTRG.118226.1	0.000444759	-1.38734	down	FN1	0.00871904	0.585395	up
MSTRG.118226.1	0.000444759	-1.38734	down	HAP1	0.0179772	-0.593464	down
MSTRG.118226.1	0.000444759	-1.38734	down	LOC102086111	0.0150312	-0.635229	down
MSTRG.124238.1	0.000539826	0.747325	up	LOC102085381	0.000284521	-0.766674	down
MSTRG.56851.8	0.00054363	-2.75273	down	IL18BP	0.00212898	-0.7717	down
MSTRG.115945.52	0.000548176	-2.76999	down	Columba_livia_newGene_11624	1.2e-05	-0.953538	down
MSTRG.4352.50	0.000600981	1.06179	up	CDR2	0.000135436	0.683528	up
MSTRG.4352.50	0.000600981	1.06179	up	GTF3A	5.89e-07	0.760351	up
MSTRG.45024.5	0.000660422	0.693103	up	Columba_livia_newGene_38505	0.0167416	0.625009	up
MSTRG.44723.1	0.000672876	-1.3983	down	Columba_livia_newGene_6974	0.0147889	-0.637227	down
MSTRG.44723.1	0.000672876	-1.3983	down	Columba_livia_newGene_92848	0.010476	-0.669818	down
MSTRG.44723.1	0.000672876	-1.3983	down	LOC102091110	0.00624168	-0.633568	down
MSTRG.44723.1	0.000672876	-1.3983	down	PTPRR	0.0132119	-0.64593	down
MSTRG.44723.1	0.000672876	-1.3983	down	TMEM171	0.0131901	-0.635105	down
MSTRG.84442.19	0.00077552	-2.62459	down	Columba_livia_newGene_88338	9.33e-05	-0.943828	down
MSTRG.84442.19	0.00077552	-2.62459	down	ANGPT1	0.0124409	-0.646905	down
MSTRG.84442.19	0.00077552	-2.62459	down	IL18BP	0.00212898	-0.7717	down
MSTRG.84442.19	0.00077552	-2.62459	down	LOC106146053	0.0122509	-0.639594	down
MSTRG.84442.19	0.00077552	-2.62459	down	PPP1R36	0.0199276	-0.597572	down
MSTRG.36949.1	0.000808574	-0.616427	down	ZDHHC12	0.0026389	-0.777436	down
MSTRG.114063.1	0.000909764	1.01053	up	LOC102095035	5.6e-06	0.639899	up
MSTRG.109211.1	0.00102001	1.71126	up	KIF27	0.0106784	-0.660719	down
MSTRG.142810.42	0.00106846	2.87345	up	FLVCR1	0.00731065	0.634247	up
MSTRG.23544.1	0.00115062	1.31712	up	Columba_livia_newGene_45668	0.014787	0.636694	up
MSTRG.23544.1	0.00115062	1.31712	up	LONRF3	0.00394292	0.602957	up
MSTRG.146468.1	0.00115674	-2.24882	down	LOC102087220	0.0163204	-0.614823	down
MSTRG.146468.1	0.00115674	-2.24882	down	LOC102095562	0.023533	-0.5915	down
MSTRG.77098.1	0.00116311	1.49077	up	OTUD1	0.000113474	0.82921	up
MSTRG.38415.6	0.00117543	-2.76579	down	TMEM60	4.63e-06	-0.961973	down
MSTRG.143526.1	0.00124595	1.62074	up	P2RY2	6.06e-05	0.692815	up
MSTRG.96061.37	0.00127142	2.83221	up	CA3	0.0134296	0.646716	up
MSTRG.126330.3	0.0014358	-1.72214	down	Columba_livia_newGene_32887	0.00147948	-0.759689	down
MSTRG.126330.3	0.0014358	-1.72214	down	Columba_livia_newGene_5206	0.000214967	-0.92561	down
MSTRG.71250.3	0.00149023	-2.25235	down	Columba_livia_newGene_92848	0.010476	-0.669818	down
MSTRG.71250.3	0.00149023	-2.25235	down	Columba_livia_newGene_92850	0.011308	-0.661699	down
MSTRG.126530.14	0.00150684	2.1115	up	Columba_livia_newGene_38505	0.0167416	0.625009	up
MSTRG.126530.14	0.00150684	2.1115	up	ITIH2	0.00015335	0.944545	up
MSTRG.126530.14	0.00150684	2.1115	up	PRG4	2.89e-07	1.18852	up
MSTRG.126530.14	0.00150684	2.1115	up	SLC5A3	0.000116541	0.783468	up
MSTRG.131250.3	0.00154419	2.78144	up	HSPA8	0.00567812	0.586679	up
MSTRG.108144.1	0.00159788	0.669402	up	LOC102091391	0.00550839	-0.722395	down
MSTRG.149226.1	0.00173082	1.08497	up	Columba_livia_newGene_20414	0.00531568	0.726452	up
MSTRG.146373.1	0.00173221	-1.0868	down	RNF135	0.000351702	-0.671343	down
MSTRG.55282.1	0.00177124	2.63124	up	SLC6A17	0.00300144	0.744276	up
MSTRG.75233.3	0.00185439	-2.60826	down	ANGPT1	0.0124409	-0.646905	down
MSTRG.75233.3	0.00185439	-2.60826	down	LOC106146053	0.0122509	-0.639594	down
MSTRG.102006.1	0.00187383	0.764373	up	PEX2	5.49e-05	0.75046	up
MSTRG.109336.2	0.00187885	-2.6165	down	LOC110362038	0.00447344	-0.601878	down
MSTRG.84605.1	0.00188477	-2.32707	down	Columba_livia_newGene_92848	0.010476	-0.669818	down
MSTRG.84605.1	0.00188477	-2.32707	down	PTPRR	0.0132119	-0.64593	down
MSTRG.84605.1	0.00188477	-2.32707	down	TMEM171	0.0131901	-0.635105	down
MSTRG.70707.1	0.00195049	-1.67732	down	CUNH1orf43	0.000965095	-0.700955	down
MSTRG.50978.3	0.00199087	1.31336	up	Columba_livia_newGene_15973	0.00827697	-0.648366	down
MSTRG.157095.4	0.00218617	-1.98943	down	Columba_livia_newGene_66591	0.00489306	-0.705885	down
MSTRG.157095.4	0.00218617	-1.98943	down	CFAP20	6.65e-13	-1.8787	down
MSTRG.157095.4	0.00218617	-1.98943	down	CSNK2A2	3.51e-09	0.811733	up
MSTRG.157095.4	0.00218617	-1.98943	down	LOC102089036	0.000982832	-0.860055	down
MSTRG.95744.4	0.00228659	-2.55897	down	EPSTI1	0.000608366	-0.887004	down
MSTRG.57515.5	0.00230562	-1.15335	down	LOC110363298	0.00106582	-0.722986	down
MSTRG.110831.1	0.00234003	0.676778	up	EIF4H	0.000105904	0.981681	up
MSTRG.110831.1	0.00234003	0.676778	up	NACA	0.00198248	0.755231	up
MSTRG.84053.1	0.00235669	-1.03171	down	ZDHHC12	0.0026389	-0.777436	down
MSTRG.156585.1	0.00238598	0.636079	up	SLC6A17	0.00300144	0.744276	up
MSTRG.101528.1	0.00241706	-1.54173	down	CUNH1orf74	8.68e-05	-1.0037	down
MSTRG.42536.22	0.00253733	-2.1743	down	ANGPT1	0.0124409	-0.646905	down
MSTRG.25830.1	0.00259697	-1.4994	down	JCHAIN	0.00831629	-0.632272	down
MSTRG.81672.1	0.0026973	0.73009	up	Columba_livia_newGene_65090	0.00627148	0.65327	up
MSTRG.97803.1	0.00284029	-2.33486	down	Columba_livia_newGene_43978	0.00116971	-0.714097	down
MSTRG.49260.5	0.00285623	-1.39917	down	Columba_livia_newGene_61357	0.00023929	-0.941051	down
MSTRG.42588.1	0.00291813	-1.26971	down	JCHAIN	0.00831629	-0.632272	down
MSTRG.42588.1	0.00291813	-1.26971	down	LOC102091110	0.00624168	-0.633568	down
MSTRG.110646.1	0.00297008	-2.30149	down	ZDHHC12	0.0026389	-0.777436	down
MSTRG.150967.22	0.00300228	-1.63176	down	ELP6	0.00214483	0.733466	up
MSTRG.33274.1	0.00302099	-1.9003	down	PTPRR	0.0132119	-0.64593	down
MSTRG.65397.1	0.00303756	1.9011	up	Columba_livia_newGene_43817	0.00942414	0.679207	up
MSTRG.93008.10	0.0031246	-1.77464	down	Columba_livia_newGene_71999	0.0107745	-0.660665	down
MSTRG.142573.14	0.00332562	-2.57875	down	Columba_livia_newGene_32902	0.00766714	-0.697016	down
MSTRG.142573.14	0.00332562	-2.57875	down	Columba_livia_newGene_75532	5.28e-20	-2.3639	down
MSTRG.142573.14	0.00332562	-2.57875	down	Columba_livia_newGene_88338	9.33e-05	-0.943828	down
MSTRG.142573.14	0.00332562	-2.57875	down	LOC102090444	0.00329003	-0.75276	down
MSTRG.142573.14	0.00332562	-2.57875	down	MCF2L	0.00017964	-0.655561	down
MSTRG.142573.14	0.00332562	-2.57875	down	SEMA6C	0.0124995	-0.624691	down
MSTRG.142570.1	0.00349866	-1.57759	down	Columba_livia_newGene_71999	0.0107745	-0.660665	down
MSTRG.142570.1	0.00349866	-1.57759	down	CUNH1orf74	8.68e-05	-1.0037	down
MSTRG.135397.27	0.00352753	-2.55564	down	Columba_livia_newGene_28139	0.0110037	-0.63939	down
MSTRG.110120.1	0.00385137	0.967696	up	Columba_livia_newGene_69212	0.0137479	-0.638404	down
MSTRG.110120.1	0.00385137	0.967696	up	LOC102085381	0.000284521	-0.766674	down
MSTRG.146501.1	0.00387814	1.14321	up	CLK1	1.26e-05	-0.721349	down
MSTRG.111009.3	0.00390552	2.53502	up	Columba_livia_newGene_47418	0.000183156	0.903455	up
MSTRG.111009.3	0.00390552	2.53502	up	Columba_livia_newGene_90074	0.00467794	-0.731816	down
MSTRG.101373.1	0.00393892	-1.94455	down	NFKBIE	4.93e-05	-0.729674	down
MSTRG.148153.1	0.00403814	-1.09036	down	Columba_livia_newGene_40990	5.86e-05	-0.792122	down
MSTRG.148153.1	0.00403814	-1.09036	down	Columba_livia_newGene_71999	0.0107745	-0.660665	down
MSTRG.148153.1	0.00403814	-1.09036	down	LRRC28	0.000280745	-0.821478	down
MSTRG.24790.2	0.00406643	-2.09597	down	Columba_livia_newGene_71999	0.0107745	-0.660665	down
MSTRG.24790.2	0.00406643	-2.09597	down	COL6A6	0.0026624	-0.786185	down
MSTRG.24790.2	0.00406643	-2.09597	down	LOC102095562	0.023533	-0.5915	down
MSTRG.154980.1	0.00417033	1.04908	up	OTUD1	0.000113474	0.82921	up
MSTRG.75297.52	0.00426562	-2.06029	down	Columba_livia_newGene_11684	5.46e-05	-0.865679	down
MSTRG.127128.7	0.00442792	2.32114	up	JMJD6	0.00959828	0.619124	up
MSTRG.102521.9	0.00460932	2.49168	up	Columba_livia_newGene_32276	0.0193101	0.607773	up
MSTRG.102521.9	0.00460932	2.49168	up	CUNH10orf71	1.61e-05	1.10209	up
MSTRG.102521.9	0.00460932	2.49168	up	YWHAG	0.00369327	0.750213	up
MSTRG.34052.1	0.00471751	-1.22622	down	PTPRR	0.0132119	-0.64593	down
MSTRG.19613.1	0.00472681	2.48559	up	Columba_livia_newGene_38505	0.0167416	0.625009	up
MSTRG.19613.1	0.00472681	2.48559	up	PRG4	2.89e-07	1.18852	up
MSTRG.19613.1	0.00472681	2.48559	up	SLC5A3	0.000116541	0.783468	up
MSTRG.148961.2	0.00473835	-1.36937	down	Columba_livia_newGene_40990	5.86e-05	-0.792122	down
MSTRG.148961.2	0.00473835	-1.36937	down	LOC102095562	0.023533	-0.5915	down
MSTRG.116018.1	0.0049204	-1.23203	down	Columba_livia_newGene_61357	0.00023929	-0.941051	down
MSTRG.120012.1	0.004953	-0.921818	down	Columba_livia_newGene_12862	0.00361315	-0.728033	down
MSTRG.45092.1	0.00497095	1.51123	up	EIF4H	0.000105904	0.981681	up
MSTRG.82987.2	0.00497765	2.47074	up	Columba_livia_newGene_38505	0.0167416	0.625009	up
MSTRG.82987.2	0.00497765	2.47074	up	ANKRD1	0.0152391	-0.602217	down
MSTRG.82987.2	0.00497765	2.47074	up	ITIH2	0.00015335	0.944545	up
MSTRG.82987.2	0.00497765	2.47074	up	PRG4	2.89e-07	1.18852	up
MSTRG.82987.2	0.00497765	2.47074	up	SLC5A3	0.000116541	0.783468	up
MSTRG.56209.12	0.0049803	2.44734	up	Columba_livia_newGene_15903	0.00387815	0.622363	up
MSTRG.111808.2	0.00506926	2.17335	up	Columba_livia_newGene_20414	0.00531568	0.726452	up
MSTRG.125734.1	0.0050717	-1.21844	down	Columba_livia_newGene_21389	0.0053983	-0.680198	down
MSTRG.2680.20	0.0051116	-2.13025	down	CUNH1orf74	8.68e-05	-1.0037	down
MSTRG.2680.20	0.0051116	-2.13025	down	LOC102092918	0.00618412	-0.715122	down
MSTRG.23438.6	0.00511224	2.41867	up	LACTBL1	0.0101531	0.670796	up
MSTRG.136008.11	0.00518001	-2.3532	down	LOC102090498	1.52e-09	-0.840717	down
MSTRG.112617.1	0.0052272	1.62402	up	Columba_livia_newGene_32276	0.0193101	0.607773	up
MSTRG.26782.31	0.00525025	-0.920428	down	Columba_livia_newGene_5204	1.87e-05	-0.983916	down
MSTRG.154218.1	0.00526908	-1.62544	down	Columba_livia_newGene_11624	1.2e-05	-0.953538	down
MSTRG.154218.1	0.00526908	-1.62544	down	Columba_livia_newGene_12862	0.00361315	-0.728033	down
MSTRG.3204.1	0.00535739	-1.23364	down	LOC102087368	1.19e-06	-0.789811	down
MSTRG.3204.1	0.00535739	-1.23364	down	LOC110363298	0.00106582	-0.722986	down
MSTRG.141713.1	0.00544107	-1.4156	down	Columba_livia_newGene_90074	0.00467794	-0.731816	down
MSTRG.129783.1	0.00570425	2.43339	up	YWHAG	0.00369327	0.750213	up
MSTRG.131423.14	0.00580182	1.37421	up	Columba_livia_newGene_20414	0.00531568	0.726452	up
MSTRG.111366.3	0.00583604	2.31415	up	Columba_livia_newGene_39315	0.00526888	0.712825	up
MSTRG.111366.3	0.00583604	2.31415	up	Columba_livia_newGene_59167	0.000221781	0.943225	up
MSTRG.82615.2	0.00615671	2.41153	up	JMJD6	0.00959828	0.619124	up
MSTRG.9220.3	0.00618095	2.41056	up	EIF4H	0.000105904	0.981681	up
MSTRG.9220.3	0.00618095	2.41056	up	NACA	0.00198248	0.755231	up
MSTRG.1337.1	0.00622366	2.39252	up	C3	0.0140423	0.616749	up
MSTRG.1337.1	0.00622366	2.39252	up	TOB2	0.000272755	0.61441	up
MSTRG.4691.35	0.0062328	2.40638	up	CDR2	0.000135436	0.683528	up
MSTRG.107262.2	0.00633165	-1.72578	down	Columba_livia_newGene_11624	1.2e-05	-0.953538	down
MSTRG.107262.2	0.00633165	-1.72578	down	JCHAIN	0.00831629	-0.632272	down
MSTRG.107262.2	0.00633165	-1.72578	down	PTPRR	0.0132119	-0.64593	down
MSTRG.145840.1	0.00633369	1.11462	up	Columba_livia_newGene_21389	0.0053983	-0.680198	down
MSTRG.79718.1	0.00636792	-1.25214	down	LOC102087128	0.00944951	-0.618764	down
MSTRG.58374.12	0.00636796	2.40157	up	JMJD6	0.00959828	0.619124	up
MSTRG.58374.12	0.00636796	2.40157	up	NCS1	0.0047158	0.63228	up
MSTRG.5020.16	0.0064247	1.1101	up	Columba_livia_newGene_62223	0.0223044	0.595195	up
MSTRG.63796.1	0.00654708	-1.47765	down	Columba_livia_newGene_6460	2.66e-07	-0.966501	down
MSTRG.63796.1	0.00654708	-1.47765	down	Columba_livia_newGene_69894	0.00956689	-0.642507	down
MSTRG.63796.1	0.00654708	-1.47765	down	Columba_livia_newGene_83347	0.0037352	-0.750349	down
MSTRG.63796.1	0.00654708	-1.47765	down	Columba_livia_newGene_84744	0.00502597	-0.721982	down
MSTRG.63796.1	0.00654708	-1.47765	down	CDCA7L	0.00667558	-0.63885	down
MSTRG.63796.1	0.00654708	-1.47765	down	HAP1	0.0179772	-0.593464	down
MSTRG.63796.1	0.00654708	-1.47765	down	LOC102086111	0.0150312	-0.635229	down
MSTRG.156449.3	0.00662583	-2.35842	down	ANGPT1	0.0124409	-0.646905	down
MSTRG.102168.1	0.00664997	1.88572	up	Columba_livia_newGene_38505	0.0167416	0.625009	up
MSTRG.34377.1	0.00669281	1.87601	up	Columba_livia_newGene_59167	0.000221781	0.943225	up
MSTRG.153699.2	0.00671714	-1.53944	down	CSNK2A2	3.51e-09	0.811733	up
MSTRG.58298.1	0.00675105	1.55328	up	ADCY1	0.0040692	-0.617272	down
MSTRG.58298.1	0.00675105	1.55328	up	LONRF1	0.00253294	0.660546	up
MSTRG.93772.8	0.00675813	-2.31557	down	Columba_livia_newGene_34636	0.002649	-0.780982	down
MSTRG.93772.8	0.00675813	-2.31557	down	Columba_livia_newGene_69894	0.00956689	-0.642507	down
MSTRG.93772.8	0.00675813	-2.31557	down	Columba_livia_newGene_69899	0.00294046	-0.777969	down
MSTRG.93772.8	0.00675813	-2.31557	down	Columba_livia_newGene_90670	0.0101069	-0.603025	down
MSTRG.93772.8	0.00675813	-2.31557	down	Columba_livia_newGene_92850	0.011308	-0.661699	down
MSTRG.93772.8	0.00675813	-2.31557	down	CLIC6	0.00711036	-0.703349	down
MSTRG.93772.8	0.00675813	-2.31557	down	LOC102094944	0.00520598	-0.731185	down
MSTRG.93772.8	0.00675813	-2.31557	down	RAB37	0.0170059	-0.621773	down
MSTRG.24532.14	0.00687375	2.3793	up	Columba_livia_newGene_53229	0.000447342	0.916962	up
MSTRG.24532.14	0.00687375	2.3793	up	DHX37	0.00417019	0.727967	up
MSTRG.109686.1	0.00702195	-1.42652	down	Columba_livia_newGene_70738	0.00902703	-0.676794	down
MSTRG.32398.2	0.00709901	2.37012	up	SDF4	0.00970488	0.637265	up
MSTRG.61769.1	0.00714026	0.972946	up	SDF4	0.00970488	0.637265	up
MSTRG.22803.1	0.0072429	1.27394	up	P2RY2	6.06e-05	0.692815	up
MSTRG.22803.1	0.0072429	1.27394	up	TEPSIN	0.00849279	-0.605702	down
MSTRG.74004.3	0.00725383	1.3036	up	LOC102091826	1.99e-05	0.999889	up
MSTRG.74004.3	0.00725383	1.3036	up	P2RY2	6.06e-05	0.692815	up
MSTRG.139924.1	0.00730869	2.36161	up	OTUD1	0.000113474	0.82921	up
MSTRG.123863.1	0.00737125	2.35875	up	EIF4H	0.000105904	0.981681	up
MSTRG.123863.1	0.00737125	2.35875	up	NACA	0.00198248	0.755231	up
MSTRG.156089.11	0.00751225	2.34302	up	Columba_livia_newGene_43817	0.00942414	0.679207	up
MSTRG.59297.1	0.0075131	-1.39092	down	Columba_livia_newGene_6460	2.66e-07	-0.966501	down
MSTRG.59297.1	0.0075131	-1.39092	down	DHODH	0.00370587	-0.747523	down
MSTRG.133478.20	0.00754428	1.90179	up	APOB	0.00589694	0.629103	up
MSTRG.133478.20	0.00754428	1.90179	up	FGA	0.00345762	0.65706	up
MSTRG.133478.20	0.00754428	1.90179	up	LOC102084914	0.00141815	0.803	up
MSTRG.115562.1	0.00755848	-0.819648	down	Columba_livia_newGene_28139	0.0110037	-0.63939	down
MSTRG.115562.1	0.00755848	-0.819648	down	Columba_livia_newGene_66591	0.00489306	-0.705885	down
MSTRG.115562.1	0.00755848	-0.819648	down	CSNK2A2	3.51e-09	0.811733	up
MSTRG.115562.1	0.00755848	-0.819648	down	LOC106145902	3.81e-05	0.810096	up
MSTRG.114731.5	0.00758198	2.35078	up	ITIH2	0.00015335	0.944545	up
MSTRG.114731.5	0.00758198	2.35078	up	SLC5A3	0.000116541	0.783468	up
MSTRG.115520.46	0.00765461	2.31041	up	Columba_livia_newGene_53229	0.000447342	0.916962	up
MSTRG.115520.46	0.00765461	2.31041	up	CA3	0.0134296	0.646716	up
MSTRG.115520.46	0.00765461	2.31041	up	DHX37	0.00417019	0.727967	up
MSTRG.111492.2	0.00768684	1.22815	up	LOC102091826	1.99e-05	0.999889	up
MSTRG.111492.2	0.00768684	1.22815	up	P2RY2	6.06e-05	0.692815	up
MSTRG.131288.55	0.00787316	2.26909	up	C3	0.0140423	0.616749	up
MSTRG.107780.11	0.00788191	2.1133	up	LOC102092918	0.00618412	-0.715122	down
MSTRG.17703.16	0.00802014	-1.95481	down	ANGPT1	0.0124409	-0.646905	down
MSTRG.17703.16	0.00802014	-1.95481	down	IL18BP	0.00212898	-0.7717	down
MSTRG.17703.16	0.00802014	-1.95481	down	PPP1R36	0.0199276	-0.597572	down
MSTRG.43799.1	0.00809116	-1.94592	down	LOC102090149	0.00847551	-0.636951	down
MSTRG.147297.12	0.00829357	2.32396	up	RHOQ	1.91e-06	1.12836	up
MSTRG.147297.12	0.00829357	2.32396	up	SLC6A17	0.00300144	0.744276	up
MSTRG.16015.8	0.00848396	-2.31396	down	Columba_livia_newGene_5206	0.000214967	-0.92561	down
MSTRG.132501.4	0.00848454	2.16163	up	VASH1	0.0122159	0.618845	up
MSTRG.16825.13	0.00852542	-1.4314	down	Columba_livia_newGene_46345	0.00704849	-0.679456	down
MSTRG.131825.13	0.00857303	-2.00041	down	ANGPT1	0.0124409	-0.646905	down
MSTRG.131825.13	0.00857303	-2.00041	down	PPP1R36	0.0199276	-0.597572	down
MSTRG.24810.10	0.00863287	2.311	up	Columba_livia_newGene_32276	0.0193101	0.607773	up
MSTRG.114923.1	0.00889211	-1.92928	down	Columba_livia_newGene_75532	5.28e-20	-2.3639	down
MSTRG.114923.1	0.00889211	-1.92928	down	IL18BP	0.00212898	-0.7717	down
MSTRG.52497.2	0.00893918	2.30057	up	KCNJ3	0.00996122	0.674036	up
MSTRG.150247.1	0.00912233	-1.33298	down	LOC102087220	0.0163204	-0.614823	down
MSTRG.26782.33	0.00927737	-0.803239	down	Columba_livia_newGene_33761	0.00315006	-0.738918	down
MSTRG.26782.33	0.00927737	-0.803239	down	Columba_livia_newGene_47497	0.00328828	-0.722194	down
MSTRG.26782.33	0.00927737	-0.803239	down	Columba_livia_newGene_5204	1.87e-05	-0.983916	down
MSTRG.26782.33	0.00927737	-0.803239	down	Columba_livia_newGene_62607	3.8e-05	-1.05763	down
MSTRG.26782.33	0.00927737	-0.803239	down	KIF27	0.0106784	-0.660719	down
MSTRG.39457.4	0.00941139	2.28584	up	KCNJ3	0.00996122	0.674036	up
MSTRG.19569.10	0.00957216	-2.2475	down	DNAJC14	0.00907431	-0.5958	down
MSTRG.19569.10	0.00957216	-2.2475	down	LOC102085381	0.000284521	-0.766674	down
MSTRG.19569.10	0.00957216	-2.2475	down	LOC102091391	0.00550839	-0.722395	down
MSTRG.19569.10	0.00957216	-2.2475	down	SLC26A11	9.18e-05	0.930198	up
MSTRG.55312.1	0.0095812	1.52607	up	Columba_livia_newGene_11266	0.00334082	0.63167	up
MSTRG.55312.1	0.0095812	1.52607	up	TECTA	0.000908384	-0.769517	down
MSTRG.130679.3	0.00968812	-2.27654	down	CUNH1orf74	8.68e-05	-1.0037	down
MSTRG.70704.1	0.00972457	-1.48418	down	EPSTI1	0.000608366	-0.887004	down
MSTRG.119560.22	0.00983998	2.09028	up	LOC102087931	0.00088313	0.865988	up
MSTRG.119560.22	0.00983998	2.09028	up	VASH1	0.0122159	0.618845	up
MSTRG.133880.4	0.00989454	2.10467	up	Columba_livia_newGene_35543	0.00892491	0.679386	up
MSTRG.133880.4	0.00989454	2.10467	up	CA3	0.0134296	0.646716	up
MSTRG.17762.7	0.0100704	1.06885	up	Columba_livia_newGene_38505	0.0167416	0.625009	up
MSTRG.17762.7	0.0100704	1.06885	up	ANKRD1	0.0152391	-0.602217	down
MSTRG.17762.7	0.0100704	1.06885	up	ITIH2	0.00015335	0.944545	up
MSTRG.17762.7	0.0100704	1.06885	up	PRG4	2.89e-07	1.18852	up
MSTRG.17762.7	0.0100704	1.06885	up	SLC5A3	0.000116541	0.783468	up
MSTRG.49762.1	0.0101935	2.1676	up	EIF4H	0.000105904	0.981681	up
MSTRG.91046.28	0.0103049	2.25699	up	ITIH2	0.00015335	0.944545	up
MSTRG.91046.28	0.0103049	2.25699	up	PRG4	2.89e-07	1.18852	up
MSTRG.91046.28	0.0103049	2.25699	up	SLC5A3	0.000116541	0.783468	up
MSTRG.94909.1	0.010355	-1.26094	down	Columba_livia_newGene_91240	0.00416443	-0.749208	down
MSTRG.94909.1	0.010355	-1.26094	down	CDCA7L	0.00667558	-0.63885	down
MSTRG.91046.31	0.0103667	2.25385	up	CA3	0.0134296	0.646716	up
MSTRG.64218.2	0.0105826	-2.18392	down	Columba_livia_newGene_56872	0.00523601	-0.721921	down
MSTRG.64218.2	0.0105826	-2.18392	down	Columba_livia_newGene_6460	2.66e-07	-0.966501	down
MSTRG.110227.2	0.0109931	-2.12238	down	LOC102095562	0.023533	-0.5915	down
MSTRG.64269.1	0.0110095	-1.17104	down	CUNH1orf74	8.68e-05	-1.0037	down
MSTRG.64269.1	0.0110095	-1.17104	down	HR	0.00429906	-0.744964	down
MSTRG.25511.1	0.0111372	1.13761	up	ADCY1	0.0040692	-0.617272	down
MSTRG.25511.1	0.0111372	1.13761	up	OTUD1	0.000113474	0.82921	up
MSTRG.13622.6	0.0113047	1.96535	up	COL12A1	0.000973592	0.708665	up
MSTRG.95892.14	0.0113154	-1.04656	down	MCOLN3	0.0140781	-0.642372	down
MSTRG.42099.13	0.0115358	-0.763845	down	Columba_livia_newGene_33761	0.00315006	-0.738918	down
MSTRG.42099.13	0.0115358	-0.763845	down	Columba_livia_newGene_76246	7.53e-06	-1.17075	down
MSTRG.35791.1	0.0116246	-1.74662	down	LOC102095562	0.023533	-0.5915	down
MSTRG.153789.3	0.0118916	2.21081	up	DHX37	0.00417019	0.727967	up
MSTRG.43996.7	0.0118945	2.21138	up	RHOQ	1.91e-06	1.12836	up
MSTRG.139385.3	0.0119796	-1.28129	down	Columba_livia_newGene_49495	0.0126856	-0.652029	down
MSTRG.139385.3	0.0119796	-1.28129	down	ANGPTL4	0.0128684	-0.649434	down
MSTRG.46149.3	0.0122955	-1.58808	down	Columba_livia_newGene_40990	5.86e-05	-0.792122	down
MSTRG.46149.3	0.0122955	-1.58808	down	LOC102095562	0.023533	-0.5915	down
MSTRG.143673.21	0.01233	2.19925	up	APOB	0.00589694	0.629103	up
MSTRG.143673.21	0.01233	2.19925	up	FGA	0.00345762	0.65706	up
MSTRG.143027.1	0.0125839	1.95092	up	EIF4H	0.000105904	0.981681	up
MSTRG.132308.2	0.0125951	-1.30188	down	Columba_livia_newGene_46345	0.00704849	-0.679456	down
MSTRG.95728.82	0.01283	-2.08633	down	Columba_livia_newGene_75532	5.28e-20	-2.3639	down
MSTRG.95728.82	0.01283	-2.08633	down	Columba_livia_newGene_88338	9.33e-05	-0.943828	down
MSTRG.95728.82	0.01283	-2.08633	down	LOC102090444	0.00329003	-0.75276	down
MSTRG.95728.82	0.01283	-2.08633	down	MCF2L	0.00017964	-0.655561	down
MSTRG.121917.1	0.0129355	-1.47782	down	Columba_livia_newGene_33761	0.00315006	-0.738918	down
MSTRG.121917.1	0.0129355	-1.47782	down	Columba_livia_newGene_88338	9.33e-05	-0.943828	down
MSTRG.121917.1	0.0129355	-1.47782	down	KIF27	0.0106784	-0.660719	down
MSTRG.121917.1	0.0129355	-1.47782	down	LOC102090444	0.00329003	-0.75276	down
MSTRG.143046.33	0.0129403	2.18366	up	STARD5	0.011462	-0.593909	down
MSTRG.108069.1	0.012993	-1.99114	down	PPP1R36	0.0199276	-0.597572	down
MSTRG.48565.6	0.0130368	1.88946	up	GZF1	0.00122264	0.838992	up
MSTRG.21639.2	0.0134714	-1.44089	down	Columba_livia_newGene_44466	0.00268045	-0.777287	down
MSTRG.3987.1	0.0136773	0.902864	up	ACAN	0.00661785	0.616606	up
MSTRG.13852.6	0.013728	1.9928	up	LOC102087931	0.00088313	0.865988	up
MSTRG.13852.6	0.013728	1.9928	up	VASH1	0.0122159	0.618845	up
MSTRG.92989.26	0.0138243	2.16239	up	Columba_livia_newGene_15903	0.00387815	0.622363	up
MSTRG.119139.1	0.0138355	-1.93943	down	LOC102087220	0.0163204	-0.614823	down
MSTRG.119139.1	0.0138355	-1.93943	down	LOC102095562	0.023533	-0.5915	down
MSTRG.86106.159	0.0140413	0.988571	up	HAP1	0.0179772	-0.593464	down
MSTRG.136824.1	0.0144938	-0.628142	down	Columba_livia_newGene_29758	0.0228201	-0.59514	down
MSTRG.136824.1	0.0144938	-0.628142	down	ELP6	0.00214483	0.733466	up
MSTRG.137500.1	0.0145024	-1.82326	down	Columba_livia_newGene_5206	0.000214967	-0.92561	down
MSTRG.42330.1	0.0146057	-1.40017	down	Columba_livia_newGene_32902	0.00766714	-0.697016	down
MSTRG.42330.1	0.0146057	-1.40017	down	Columba_livia_newGene_88338	9.33e-05	-0.943828	down
MSTRG.42330.1	0.0146057	-1.40017	down	LOC102090444	0.00329003	-0.75276	down
MSTRG.108315.2	0.0148424	2.02563	up	CUNH1orf43	0.000965095	-0.700955	down
MSTRG.32758.16	0.0148696	2.09954	up	FLVCR1	0.00731065	0.634247	up
MSTRG.93537.11	0.0150035	-2.1351	down	ANGPT1	0.0124409	-0.646905	down
MSTRG.93537.11	0.0150035	-2.1351	down	PPP1R36	0.0199276	-0.597572	down
MSTRG.29294.7	0.0153179	1.68514	up	RHOQ	1.91e-06	1.12836	up
MSTRG.28296.2	0.0154455	-1.97929	down	Columba_livia_newGene_32887	0.00147948	-0.759689	down
MSTRG.127128.6	0.0154986	1.97795	up	JMJD6	0.00959828	0.619124	up
MSTRG.59410.3	0.0155211	2.12347	up	SDF4	0.00970488	0.637265	up
MSTRG.25742.1	0.0160874	-1.16281	down	Columba_livia_newGene_28339	0.00104283	-0.718003	down
MSTRG.25742.1	0.0160874	-1.16281	down	Columba_livia_newGene_83347	0.0037352	-0.750349	down
MSTRG.25742.1	0.0160874	-1.16281	down	Columba_livia_newGene_84744	0.00502597	-0.721982	down
MSTRG.25742.1	0.0160874	-1.16281	down	HAP1	0.0179772	-0.593464	down
MSTRG.25742.1	0.0160874	-1.16281	down	LOC102086111	0.0150312	-0.635229	down
MSTRG.66071.22	0.0161167	2.1113	up	Columba_livia_newGene_53229	0.000447342	0.916962	up
MSTRG.66071.22	0.0161167	2.1113	up	DHX37	0.00417019	0.727967	up
MSTRG.11998.13	0.0164609	-1.48215	down	Columba_livia_newGene_56742	0.00165074	-0.6921	down
MSTRG.153424.20	0.0164997	2.10332	up	KCNJ3	0.00996122	0.674036	up
MSTRG.153424.20	0.0164997	2.10332	up	MMRN1	0.000656944	0.751338	up
MSTRG.5048.1	0.0168574	1.16086	up	Columba_livia_newGene_43817	0.00942414	0.679207	up
MSTRG.5048.1	0.0168574	1.16086	up	Columba_livia_newGene_62223	0.0223044	0.595195	up
MSTRG.14967.3	0.0169898	-0.650078	down	Columba_livia_newGene_90074	0.00467794	-0.731816	down
MSTRG.14967.3	0.0169898	-0.650078	down	LRRC28	0.000280745	-0.821478	down
MSTRG.14967.3	0.0169898	-0.650078	down	NFKBIE	4.93e-05	-0.729674	down
MSTRG.14967.3	0.0169898	-0.650078	down	STARD5	0.011462	-0.593909	down
MSTRG.84049.1	0.0171072	-1.26183	down	RNF135	0.000351702	-0.671343	down
MSTRG.82329.12	0.0171747	-0.78687	down	Columba_livia_newGene_33761	0.00315006	-0.738918	down
MSTRG.82329.12	0.0171747	-0.78687	down	Columba_livia_newGene_62607	3.8e-05	-1.05763	down
MSTRG.82329.12	0.0171747	-0.78687	down	Columba_livia_newGene_88338	9.33e-05	-0.943828	down
MSTRG.82329.12	0.0171747	-0.78687	down	KIF27	0.0106784	-0.660719	down
MSTRG.71762.2	0.0173176	0.933968	up	Columba_livia_newGene_38505	0.0167416	0.625009	up
MSTRG.71762.2	0.0173176	0.933968	up	PRG4	2.89e-07	1.18852	up
MSTRG.120158.1	0.0174852	-1.69169	down	Columba_livia_newGene_62607	3.8e-05	-1.05763	down
MSTRG.120158.1	0.0174852	-1.69169	down	Columba_livia_newGene_75532	5.28e-20	-2.3639	down
MSTRG.120158.1	0.0174852	-1.69169	down	Columba_livia_newGene_88338	9.33e-05	-0.943828	down
MSTRG.120158.1	0.0174852	-1.69169	down	FAIM2	4.02e-05	-1.02995	down
MSTRG.120158.1	0.0174852	-1.69169	down	LOC106146053	0.0122509	-0.639594	down
MSTRG.91503.8	0.0175458	-2.03671	down	Columba_livia_newGene_34576	0.0022457	-0.794017	down
MSTRG.91503.8	0.0175458	-2.03671	down	PPP1R36	0.0199276	-0.597572	down
MSTRG.105780.1	0.01761	-1.0802	down	STARD5	0.011462	-0.593909	down
MSTRG.3079.1	0.0178914	-0.981312	down	Columba_livia_newGene_75532	5.28e-20	-2.3639	down
MSTRG.3079.1	0.0178914	-0.981312	down	Columba_livia_newGene_88338	9.33e-05	-0.943828	down
MSTRG.3079.1	0.0178914	-0.981312	down	LOC102096675	0.00550847	-0.714555	down
MSTRG.118708.15	0.0179134	1.93922	up	YWHAG	0.00369327	0.750213	up
MSTRG.66909.86	0.0179673	-1.26594	down	Columba_livia_newGene_75532	5.28e-20	-2.3639	down
MSTRG.66909.86	0.0179673	-1.26594	down	LOC102096675	0.00550847	-0.714555	down
MSTRG.66909.86	0.0179673	-1.26594	down	RIOX1	0.000688872	0.599465	up
MSTRG.4895.4	0.0179925	-0.924491	down	CUNH1orf43	0.000965095	-0.700955	down
MSTRG.69966.1	0.0180713	-1.12813	down	ADCY1	0.0040692	-0.617272	down
MSTRG.69966.1	0.0180713	-1.12813	down	LOC110363298	0.00106582	-0.722986	down
MSTRG.67094.1	0.018656	1.43411	up	COMP	7.38e-05	0.884724	up
MSTRG.53869.1	0.0188937	-1.38046	down	ANKRD1	0.0152391	-0.602217	down
MSTRG.92183.4	0.0189735	-1.95763	down	AADAC	0.00864385	-0.681892	down
MSTRG.8742.38	0.0191769	1.85576	up	LOC102089036	0.000982832	-0.860055	down
MSTRG.127144.1	0.0192929	-1.2306	down	Columba_livia_newGene_76246	7.53e-06	-1.17075	down
MSTRG.127144.1	0.0192929	-1.2306	down	Columba_livia_newGene_85626	0.00862754	-0.684691	down
MSTRG.127144.1	0.0192929	-1.2306	down	RGS9	0.0012008	-0.700941	down
MSTRG.63752.1	0.0197474	-0.954553	down	Columba_livia_newGene_29545	0.0171861	-0.618595	down
MSTRG.63752.1	0.0197474	-0.954553	down	Columba_livia_newGene_47418	0.000183156	0.903455	up
MSTRG.63752.1	0.0197474	-0.954553	down	Columba_livia_newGene_70738	0.00902703	-0.676794	down
MSTRG.115546.27	0.0199167	2.04052	up	F5	0.00417855	0.637358	up
MSTRG.39940.1	0.0200603	1.85224	up	Columba_livia_newGene_47418	0.000183156	0.903455	up
MSTRG.22393.1	0.0201525	-0.799116	down	LONRF3	0.00394292	0.602957	up
MSTRG.45681.1	0.0203044	1.09495	up	RAB37	0.0170059	-0.621773	down
MSTRG.140090.1	0.0203336	-1.14886	down	LOC102092918	0.00618412	-0.715122	down
MSTRG.17454.1	0.0204294	1.07357	up	Columba_livia_newGene_32276	0.0193101	0.607773	up
MSTRG.17454.1	0.0204294	1.07357	up	CUNH10orf71	1.61e-05	1.10209	up
MSTRG.141706.1	0.0205071	-0.923998	down	FOXRED2	0.0036122	0.59918	up
MSTRG.101764.1	0.0205965	-1.34144	down	Columba_livia_newGene_6974	0.0147889	-0.637227	down
MSTRG.115662.9	0.0206751	2.02671	up	CUNH10orf71	1.61e-05	1.10209	up
MSTRG.115662.9	0.0206751	2.02671	up	YWHAG	0.00369327	0.750213	up
MSTRG.60345.1	0.0209711	-1.69857	down	CUNH9orf78	0.00811457	-0.659653	down
MSTRG.60345.1	0.0209711	-1.69857	down	SREBF2	0.00942793	0.593658	up
MSTRG.24724.4	0.0215151	1.70278	up	FAM76A	3.4e-11	-1.41028	down
MSTRG.86315.3	0.0216977	1.95715	up	Columba_livia_newGene_45668	0.014787	0.636694	up
MSTRG.86315.3	0.0216977	1.95715	up	Columba_livia_newGene_79516	0.0121973	0.649676	up
MSTRG.89989.31	0.0219682	2.00565	up	YWHAG	0.00369327	0.750213	up
MSTRG.34997.3	0.0219709	-2.01604	down	JCHAIN	0.00831629	-0.632272	down
MSTRG.34997.3	0.0219709	-2.01604	down	LOC102098481	0.00494386	-0.725302	down
MSTRG.80614.1	0.0219801	1.18059	up	ITIH2	0.00015335	0.944545	up
MSTRG.80614.1	0.0219801	1.18059	up	PRG4	2.89e-07	1.18852	up
MSTRG.80614.1	0.0219801	1.18059	up	SLC5A3	0.000116541	0.783468	up
MSTRG.155197.2	0.0220015	1.55228	up	RHOQ	1.91e-06	1.12836	up
MSTRG.135930.17	0.0220505	2.00616	up	Columba_livia_newGene_39315	0.00526888	0.712825	up
MSTRG.135930.17	0.0220505	2.00616	up	SLC6A17	0.00300144	0.744276	up
MSTRG.143046.35	0.0223771	1.6556	up	Columba_livia_newGene_39315	0.00526888	0.712825	up
MSTRG.143046.35	0.0223771	1.6556	up	LOC102089105	0.00245946	0.781122	up
MSTRG.143046.35	0.0223771	1.6556	up	STARD5	0.011462	-0.593909	down
MSTRG.102284.1	0.0224916	-1.30253	down	LOC110363298	0.00106582	-0.722986	down
MSTRG.137656.1	0.0228152	-1.57559	down	LOC110363298	0.00106582	-0.722986	down
MSTRG.102499.2	0.0230929	-1.60525	down	Columba_livia_newGene_92848	0.010476	-0.669818	down
MSTRG.102499.2	0.0230929	-1.60525	down	CLIC6	0.00711036	-0.703349	down
MSTRG.3078.1	0.0232265	-1.06615	down	Columba_livia_newGene_62607	3.8e-05	-1.05763	down
MSTRG.3078.1	0.0232265	-1.06615	down	Columba_livia_newGene_88338	9.33e-05	-0.943828	down
MSTRG.156299.1	0.0233283	-1.05075	down	Columba_livia_newGene_5206	0.000214967	-0.92561	down
MSTRG.111395.1	0.0233947	-1.80781	down	Columba_livia_newGene_5204	1.87e-05	-0.983916	down
MSTRG.111395.1	0.0233947	-1.80781	down	Columba_livia_newGene_62607	3.8e-05	-1.05763	down
MSTRG.111395.1	0.0233947	-1.80781	down	RIOX1	0.000688872	0.599465	up
MSTRG.90680.3	0.0236596	-1.98915	down	MYBL1	0.0244619	-0.588691	down
MSTRG.84601.26	0.0238793	-1.27414	down	SUSD3	0.00295268	-0.671735	down
MSTRG.84601.26	0.0238793	-1.27414	down	TMEM171	0.0131901	-0.635105	down
MSTRG.84601.26	0.0238793	-1.27414	down	ZDHHC12	0.0026389	-0.777436	down
MSTRG.15536.1	0.024379	-1.35733	down	Columba_livia_newGene_92850	0.011308	-0.661699	down
MSTRG.15536.1	0.024379	-1.35733	down	LOC102094944	0.00520598	-0.731185	down
MSTRG.15536.1	0.024379	-1.35733	down	LOC102094944	0.00520598	-0.731185	down
MSTRG.15536.1	0.024379	-1.35733	down	TMEM171	0.0131901	-0.635105	down
MSTRG.86451.6	0.0246266	-1.85675	down	LOC102090444	0.00329003	-0.75276	down
MSTRG.73853.29	0.0247856	1.89808	up	KCNJ3	0.00996122	0.674036	up
MSTRG.76727.6	0.0248348	-1.94919	down	DHODH	0.00370587	-0.747523	down
MSTRG.129746.1	0.0249102	1.91335	up	LOC102085381	0.000284521	-0.766674	down
MSTRG.129746.1	0.0249102	1.91335	up	SLC26A11	9.18e-05	0.930198	up
MSTRG.126306.1	0.0249951	-1.34825	down	Columba_livia_newGene_11624	1.2e-05	-0.953538	down
MSTRG.42677.1	0.0251246	-1.03849	down	RGS9	0.0012008	-0.700941	down
MSTRG.42677.1	0.0251246	-1.03849	down	TECTA	0.000908384	-0.769517	down
MSTRG.131939.1	0.0254935	1.00313	up	TMED5	3.44e-05	-1.08285	down
MSTRG.113738.1	0.0266733	1.28674	up	Columba_livia_newGene_38505	0.0167416	0.625009	up
MSTRG.113738.1	0.0266733	1.28674	up	ITIH2	0.00015335	0.944545	up
MSTRG.113738.1	0.0266733	1.28674	up	PRG4	2.89e-07	1.18852	up
MSTRG.113738.1	0.0266733	1.28674	up	SLC5A3	0.000116541	0.783468	up
MSTRG.98418.1	0.0271952	1.32147	up	Columba_livia_newGene_93396	0.0217242	0.597308	up
MSTRG.115537.2	0.0273711	-1.54952	down	FGF2	2.95e-16	1.27397	up
MSTRG.856.1	0.0277463	-1.00605	down	Columba_livia_newGene_85626	0.00862754	-0.684691	down
MSTRG.856.1	0.0277463	-1.00605	down	SULT4A1	0.00069691	-0.767639	down
MSTRG.148507.2	0.0279887	-1.54972	down	Columba_livia_newGene_71999	0.0107745	-0.660665	down
MSTRG.102005.1	0.0281588	0.990524	up	PEX2	5.49e-05	0.75046	up
MSTRG.86945.2	0.0283639	-1.75172	down	Columba_livia_newGene_34576	0.0022457	-0.794017	down
MSTRG.58270.2	0.0287288	1.89672	up	Columba_livia_newGene_65090	0.00627148	0.65327	up
MSTRG.58270.2	0.0287288	1.89672	up	LOC102095035	5.6e-06	0.639899	up
MSTRG.93750.1	0.0288613	-1.28455	down	Columba_livia_newGene_47212	0.0218094	-0.59793	down
MSTRG.93750.1	0.0288613	-1.28455	down	Columba_livia_newGene_56872	0.00523601	-0.721921	down
MSTRG.63248.5	0.0289455	1.91132	up	Columba_livia_newGene_51430	0.00490073	0.731519	up
MSTRG.73345.87	0.0294121	-1.64719	down	PPP1R36	0.0199276	-0.597572	down
MSTRG.118204.1	0.0298406	-0.787059	down	Columba_livia_newGene_66591	0.00489306	-0.705885	down
MSTRG.118204.1	0.0298406	-0.787059	down	LOC102089036	0.000982832	-0.860055	down
MSTRG.82779.38	0.0299174	-1.41061	down	LOC102087368	1.19e-06	-0.789811	down
MSTRG.82779.38	0.0299174	-1.41061	down	TRPM6	0.0109686	-0.650399	down
MSTRG.92813.1	0.0299284	-1.32176	down	Columba_livia_newGene_70738	0.00902703	-0.676794	down
MSTRG.92813.1	0.0299284	-1.32176	down	Columba_livia_newGene_90074	0.00467794	-0.731816	down
MSTRG.151642.31	0.0300844	-1.02383	down	LOC102094944	0.00520598	-0.731185	down
MSTRG.24025.1	0.030472	1.28359	up	KCNJ3	0.00996122	0.674036	up
MSTRG.56851.28	0.0310944	-1.82295	down	Columba_livia_newGene_89161	0.000246334	-0.912285	down
MSTRG.56851.28	0.0310944	-1.82295	down	AADAC	0.00864385	-0.681892	down
MSTRG.56851.28	0.0310944	-1.82295	down	IL18BP	0.00212898	-0.7717	down
MSTRG.21907.3	0.0314024	-1.81632	down	COL6A6	0.0026624	-0.786185	down
MSTRG.21907.3	0.0314024	-1.81632	down	LOC102087220	0.0163204	-0.614823	down
MSTRG.21907.3	0.0314024	-1.81632	down	LOC102095562	0.023533	-0.5915	down
MSTRG.134307.21	0.0316483	1.02693	up	CFAP20	6.65e-13	-1.8787	down
MSTRG.42609.43	0.0318675	-1.8515	down	LOC102092918	0.00618412	-0.715122	down
MSTRG.43543.1	0.0321273	1.32029	up	LOC102087931	0.00088313	0.865988	up
MSTRG.39495.34	0.0321689	1.86568	up	Columba_livia_newGene_29545	0.0171861	-0.618595	down
MSTRG.39495.34	0.0321689	1.86568	up	Columba_livia_newGene_47418	0.000183156	0.903455	up
MSTRG.39495.34	0.0321689	1.86568	up	Columba_livia_newGene_70738	0.00902703	-0.676794	down
MSTRG.76933.11	0.0323704	1.64226	up	Columba_livia_newGene_79516	0.0121973	0.649676	up
MSTRG.123963.36	0.0324034	1.16898	up	EIF4H	0.000105904	0.981681	up
MSTRG.141103.1	0.0324101	1.23026	up	YWHAG	0.00369327	0.750213	up
MSTRG.1393.3	0.0324786	1.8628	up	LOC102087931	0.00088313	0.865988	up
MSTRG.1393.3	0.0324786	1.8628	up	VASH1	0.0122159	0.618845	up
MSTRG.99904.20	0.0327187	1.87403	up	FAM212B	0.00570909	0.704717	up
MSTRG.145361.1	0.0327628	-0.970722	down	Columba_livia_newGene_92848	0.010476	-0.669818	down
MSTRG.145361.1	0.0327628	-0.970722	down	SUSD3	0.00295268	-0.671735	down
MSTRG.145361.1	0.0327628	-0.970722	down	TMEM171	0.0131901	-0.635105	down
MSTRG.51464.1	0.0330479	1.04112	up	EIF4H	0.000105904	0.981681	up
MSTRG.108247.1	0.033209	-0.686101	down	LOC102087124	0.00146238	-0.799445	down
MSTRG.42038.28	0.0335455	-1.66589	down	AMER3	0.000850984	-0.686425	down
MSTRG.42038.27	0.0338058	1.86157	up	LOC102087931	0.00088313	0.865988	up
MSTRG.99077.2	0.0340242	-0.994003	down	Columba_livia_newGene_91240	0.00416443	-0.749208	down
MSTRG.62759.1	0.0345353	-1.33397	down	PPP1R36	0.0199276	-0.597572	down
MSTRG.89303.44	0.0345977	1.83747	up	Columba_livia_newGene_32276	0.0193101	0.607773	up
MSTRG.26082.32	0.0346247	1.75304	up	CA3	0.0134296	0.646716	up
MSTRG.25433.1	0.0347718	-1.07647	down	Columba_livia_newGene_29545	0.0171861	-0.618595	down
MSTRG.25433.1	0.0347718	-1.07647	down	Columba_livia_newGene_70738	0.00902703	-0.676794	down
MSTRG.42679.1	0.0348171	-1.12689	down	Columba_livia_newGene_56742	0.00165074	-0.6921	down
MSTRG.4853.1	0.0349382	-1.22623	down	Columba_livia_newGene_83347	0.0037352	-0.750349	down
MSTRG.4853.1	0.0349382	-1.22623	down	Columba_livia_newGene_84744	0.00502597	-0.721982	down
MSTRG.4853.1	0.0349382	-1.22623	down	LOC102098481	0.00494386	-0.725302	down
MSTRG.3338.5	0.0349906	-1.75522	down	ANKRD1	0.0152391	-0.602217	down
MSTRG.18676.1	0.0350466	1.24983	up	Columba_livia_newGene_38505	0.0167416	0.625009	up
MSTRG.27215.99	0.035763	1.70902	up	RHOQ	1.91e-06	1.12836	up
MSTRG.88894.4	0.0367711	1.35651	up	Columba_livia_newGene_15903	0.00387815	0.622363	up
MSTRG.130959.16	0.03694	1.83443	up	Columba_livia_newGene_39315	0.00526888	0.712825	up
MSTRG.130959.16	0.03694	1.83443	up	LOC102089105	0.00245946	0.781122	up
MSTRG.23514.1	0.0371635	0.832494	up	APOB	0.00589694	0.629103	up
MSTRG.23514.1	0.0371635	0.832494	up	LONRF3	0.00394292	0.602957	up
MSTRG.84291.1	0.037369	-0.842136	down	Columba_livia_newGene_83347	0.0037352	-0.750349	down
MSTRG.84291.1	0.037369	-0.842136	down	Columba_livia_newGene_84744	0.00502597	-0.721982	down
MSTRG.84291.1	0.037369	-0.842136	down	HAP1	0.0179772	-0.593464	down
MSTRG.84291.1	0.037369	-0.842136	down	LOC102086111	0.0150312	-0.635229	down
MSTRG.84291.1	0.037369	-0.842136	down	LOC102098481	0.00494386	-0.725302	down
MSTRG.88426.2	0.0373993	-1.79597	down	PTPRR	0.0132119	-0.64593	down
MSTRG.114543.1	0.0375405	-1.39098	down	Columba_livia_newGene_83347	0.0037352	-0.750349	down
MSTRG.114543.1	0.0375405	-1.39098	down	Columba_livia_newGene_90670	0.0101069	-0.603025	down
MSTRG.114543.1	0.0375405	-1.39098	down	JCHAIN	0.00831629	-0.632272	down
MSTRG.114543.1	0.0375405	-1.39098	down	LOC102098481	0.00494386	-0.725302	down
MSTRG.108527.11	0.0377962	1.804	up	Columba_livia_newGene_35543	0.00892491	0.679386	up
MSTRG.108527.11	0.0377962	1.804	up	Columba_livia_newGene_53229	0.000447342	0.916962	up
MSTRG.108527.11	0.0377962	1.804	up	CA3	0.0134296	0.646716	up
MSTRG.108527.11	0.0377962	1.804	up	DHX37	0.00417019	0.727967	up
MSTRG.144940.10	0.0381652	-1.63065	down	JCHAIN	0.00831629	-0.632272	down
MSTRG.144940.10	0.0381652	-1.63065	down	LOC102095562	0.023533	-0.5915	down
MSTRG.78678.1	0.0387362	-1.74327	down	PTPRR	0.0132119	-0.64593	down
MSTRG.100603.49	0.0390883	-1.60598	down	COL6A6	0.0026624	-0.786185	down
MSTRG.100603.49	0.0390883	-1.60598	down	LOC102095562	0.023533	-0.5915	down
MSTRG.86951.1	0.0392182	-0.822292	down	LOC102092918	0.00618412	-0.715122	down
MSTRG.157634.3	0.0399845	-1.50115	down	Columba_livia_newGene_75532	5.28e-20	-2.3639	down
MSTRG.157634.3	0.0399845	-1.50115	down	SEMA6C	0.0124995	-0.624691	down
MSTRG.2688.1	0.0402231	-0.965931	down	Columba_livia_newGene_32902	0.00766714	-0.697016	down
MSTRG.2688.1	0.0402231	-0.965931	down	Columba_livia_newGene_75532	5.28e-20	-2.3639	down
MSTRG.2688.1	0.0402231	-0.965931	down	Columba_livia_newGene_88338	9.33e-05	-0.943828	down
MSTRG.2688.1	0.0402231	-0.965931	down	IL18BP	0.00212898	-0.7717	down
MSTRG.2688.1	0.0402231	-0.965931	down	LOC102096675	0.00550847	-0.714555	down
MSTRG.25503.4	0.0403456	1.77806	up	LONRF3	0.00394292	0.602957	up
MSTRG.25503.4	0.0403456	1.77806	up	OTUD1	0.000113474	0.82921	up
MSTRG.42561.1	0.0405306	-1.21791	down	Columba_livia_newGene_78293	0.0138616	-0.601427	down
MSTRG.42561.1	0.0405306	-1.21791	down	LOC102091110	0.00624168	-0.633568	down
MSTRG.42561.1	0.0405306	-1.21791	down	PTPRR	0.0132119	-0.64593	down
MSTRG.130997.1	0.0406772	-0.774087	down	CUNH9orf78	0.00811457	-0.659653	down
MSTRG.142591.1	0.0407032	0.870411	up	YWHAG	0.00369327	0.750213	up
MSTRG.43728.1	0.0407917	-1.19381	down	Columba_livia_newGene_32902	0.00766714	-0.697016	down
MSTRG.43728.1	0.0407917	-1.19381	down	Columba_livia_newGene_75532	5.28e-20	-2.3639	down
MSTRG.43728.1	0.0407917	-1.19381	down	LOC102096675	0.00550847	-0.714555	down
MSTRG.114445.45	0.040982	-1.54356	down	LOC110362038	0.00447344	-0.601878	down
MSTRG.51365.1	0.0412068	-1.72666	down	Columba_livia_newGene_34636	0.002649	-0.780982	down
MSTRG.51365.1	0.0412068	-1.72666	down	Columba_livia_newGene_76246	7.53e-06	-1.17075	down
MSTRG.51365.1	0.0412068	-1.72666	down	Columba_livia_newGene_92850	0.011308	-0.661699	down
MSTRG.51365.1	0.0412068	-1.72666	down	LOC102094944	0.00520598	-0.731185	down
MSTRG.132865.10	0.0416381	-1.7879	down	COL6A6	0.0026624	-0.786185	down
MSTRG.132865.10	0.0416381	-1.7879	down	LOC102095562	0.023533	-0.5915	down
MSTRG.44261.31	0.0417718	1.7732	up	Columba_livia_newGene_43817	0.00942414	0.679207	up
MSTRG.94304.29	0.0422276	-1.28561	down	ANGPT1	0.0124409	-0.646905	down
MSTRG.94304.29	0.0422276	-1.28561	down	IL18BP	0.00212898	-0.7717	down
MSTRG.94304.29	0.0422276	-1.28561	down	LOC106146053	0.0122509	-0.639594	down
MSTRG.76292.11	0.042656	1.75598	up	Columba_livia_newGene_79021	0.0078593	0.612807	up
MSTRG.91458.1	0.0428201	-1.41354	down	AADAC	0.00864385	-0.681892	down
MSTRG.17545.11	0.0430048	1.75272	up	CUNH10orf71	1.61e-05	1.10209	up
MSTRG.17545.11	0.0430048	1.75272	up	KCNJ3	0.00996122	0.674036	up
MSTRG.151859.1	0.0431757	-1.05632	down	USP18	7.08e-09	-1.15237	down
MSTRG.72805.1	0.0437587	1.33284	up	BPI	0.0115073	0.615887	up
MSTRG.24661.2	0.044077	-1.67634	down	Columba_livia_newGene_75532	5.28e-20	-2.3639	down
MSTRG.24661.2	0.044077	-1.67634	down	LOC102096675	0.00550847	-0.714555	down
MSTRG.98553.2	0.0449238	1.34227	up	Columba_livia_newGene_89161	0.000246334	-0.912285	down
MSTRG.98553.2	0.0449238	1.34227	up	AADAC	0.00864385	-0.681892	down
MSTRG.109063.64	0.0453511	1.36578	up	JMJD6	0.00959828	0.619124	up
MSTRG.118365.1	0.0454624	-1.0528	down	Columba_livia_newGene_83347	0.0037352	-0.750349	down
MSTRG.118365.1	0.0454624	-1.0528	down	LOC102086111	0.0150312	-0.635229	down
MSTRG.118365.1	0.0454624	-1.0528	down	LOC102090149	0.00847551	-0.636951	down
MSTRG.6700.5	0.0455123	-0.806472	down	LOC110362038	0.00447344	-0.601878	down
MSTRG.52811.1	0.0455434	1.75959	up	PEX2	5.49e-05	0.75046	up
MSTRG.54298.22	0.0455687	-0.882441	down	ANGPT1	0.0124409	-0.646905	down
MSTRG.54298.22	0.0455687	-0.882441	down	LOC106146053	0.0122509	-0.639594	down
MSTRG.105256.66	0.0457522	-1.74482	down	IL18BP	0.00212898	-0.7717	down
MSTRG.101548.1	0.045941	1.1638	up	P2RY2	6.06e-05	0.692815	up
MSTRG.71597.2	0.0461825	-1.2813	down	Columba_livia_newGene_11684	5.46e-05	-0.865679	down
MSTRG.71597.2	0.0461825	-1.2813	down	RSAD2	5.58e-05	-1.00153	down
MSTRG.109646.1	0.0466284	1.0177	up	LOC102098485	0.00592713	-0.637728	down
MSTRG.109100.3	0.0470795	-1.74809	down	AMER3	0.000850984	-0.686425	down
MSTRG.65308.1	0.0472587	1.73773	up	TNFRSF4	0.00914282	-0.681519	down
MSTRG.114342.3	0.0474974	-1.40788	down	Columba_livia_newGene_47497	0.00328828	-0.722194	down
MSTRG.114342.3	0.0474974	-1.40788	down	Columba_livia_newGene_56872	0.00523601	-0.721921	down
MSTRG.80043.1	0.0475176	-0.909729	down	TMEM171	0.0131901	-0.635105	down
MSTRG.62144.6	0.0478945	1.74147	up	Columba_livia_newGene_39315	0.00526888	0.712825	up
MSTRG.62144.6	0.0478945	1.74147	up	LOC102089105	0.00245946	0.781122	up
MSTRG.62497.6	0.0483315	-1.31438	down	Columba_livia_newGene_57104	0.00838287	-0.671064	down
MSTRG.62497.6	0.0483315	-1.31438	down	Columba_livia_newGene_69894	0.00956689	-0.642507	down
MSTRG.62497.6	0.0483315	-1.31438	down	Columba_livia_newGene_69899	0.00294046	-0.777969	down
MSTRG.62497.6	0.0483315	-1.31438	down	Columba_livia_newGene_84744	0.00502597	-0.721982	down
MSTRG.62497.6	0.0483315	-1.31438	down	Columba_livia_newGene_90670	0.0101069	-0.603025	down
MSTRG.62497.6	0.0483315	-1.31438	down	CDCA7L	0.00667558	-0.63885	down
MSTRG.62497.6	0.0483315	-1.31438	down	LOC102098481	0.00494386	-0.725302	down
MSTRG.14871.1	0.0484795	-1.51095	down	Columba_livia_newGene_44466	0.00268045	-0.777287	down
MSTRG.14871.1	0.0484795	-1.51095	down	ZDHHC12	0.0026389	-0.777436	down
MSTRG.42403.1	0.0484947	-0.845113	down	Columba_livia_newGene_34636	0.002649	-0.780982	down
MSTRG.42403.1	0.0484947	-0.845113	down	Columba_livia_newGene_57104	0.00838287	-0.671064	down
MSTRG.42403.1	0.0484947	-0.845113	down	Columba_livia_newGene_69899	0.00294046	-0.777969	down
MSTRG.42403.1	0.0484947	-0.845113	down	Columba_livia_newGene_90670	0.0101069	-0.603025	down
MSTRG.42403.1	0.0484947	-0.845113	down	CLGN	0.0143193	-0.638029	down
MSTRG.42403.1	0.0484947	-0.845113	down	CLIC6	0.00711036	-0.703349	down
MSTRG.42403.1	0.0484947	-0.845113	down	CUNH9orf85	0.00398694	-0.696418	down
MSTRG.42403.1	0.0484947	-0.845113	down	LOC102091110	0.00624168	-0.633568	down
MSTRG.42403.1	0.0484947	-0.845113	down	RAB37	0.0170059	-0.621773	down
MSTRG.42403.1	0.0484947	-0.845113	down	RNF135	0.000351702	-0.671343	down
MSTRG.39640.10	0.0485663	-0.608464	down	Columba_livia_newGene_78293	0.0138616	-0.601427	down
MSTRG.39640.10	0.0485663	-0.608464	down	LOC102091110	0.00624168	-0.633568	down
MSTRG.39640.10	0.0485663	-0.608464	down	MCOLN3	0.0140781	-0.642372	down
MSTRG.39640.10	0.0485663	-0.608464	down	PTPRR	0.0132119	-0.64593	down
MSTRG.75592.3	0.048613	-1.11118	down	Columba_livia_newGene_6460	2.66e-07	-0.966501	down
MSTRG.75592.3	0.048613	-1.11118	down	Columba_livia_newGene_69894	0.00956689	-0.642507	down
MSTRG.75592.3	0.048613	-1.11118	down	Columba_livia_newGene_69899	0.00294046	-0.777969	down
MSTRG.105274.1	0.0487643	-0.690643	down	SREBF2	0.00942793	0.593658	up
MSTRG.64439.1	0.048819	1.5803	up	GZF1	0.00122264	0.838992	up
MSTRG.45091.6	0.0489598	-1.51221	down	Columba_livia_newGene_57104	0.00838287	-0.671064	down
MSTRG.45091.6	0.0489598	-1.51221	down	Columba_livia_newGene_90670	0.0101069	-0.603025	down
MSTRG.45091.6	0.0489598	-1.51221	down	CLGN	0.0143193	-0.638029	down
MSTRG.45091.6	0.0489598	-1.51221	down	CLIC6	0.00711036	-0.703349	down
MSTRG.45091.6	0.0489598	-1.51221	down	EIF4H	0.000105904	0.981681	up
MSTRG.45091.6	0.0489598	-1.51221	down	LOC102091110	0.00624168	-0.633568	down
MSTRG.45091.6	0.0489598	-1.51221	down	LOC102094944	0.00520598	-0.731185	down
MSTRG.45091.6	0.0489598	-1.51221	down	RAB37	0.0170059	-0.621773	down
MSTRG.136018.22	0.0498229	1.69726	up	CAPN14	0.000605204	-0.676676	down

## Sheet: Supplementary S5b
Table S5b Co-expressed pairs of DE-lncRNA and DEG for N vs. T birds
LncRNA	LncRNA_Pvalue	LncRNA_log2FC	LncRNA_direction	Gene	Gene_Pvalue	Gene_log2FC	Gene_direction
MSTRG.20358.22	4.03e-31	7.95253	up	Columba_livia_newGene_25824	0.0166123	0.641811	up
MSTRG.20358.22	4.03e-31	7.95253	up	Columba_livia_newGene_43539	3.95e-20	2.46545	up
MSTRG.20358.22	4.03e-31	7.95253	up	TMEM26	0.0224488	-0.607009	down
MSTRG.23423.41	7.15e-22	-6.64212	down	DNASE1L3	0.0200231	-0.588797	down
MSTRG.23423.41	7.15e-22	-6.64212	down	MAML1	2.91e-05	-0.80229	down
MSTRG.23423.41	7.15e-22	-6.64212	down	TAF1D	0.0063712	-0.636529	down
MSTRG.39405.34	1.03e-21	6.73928	up	OSR2	0.0105762	-0.673746	down
MSTRG.95728.48	1.02e-17	-6.28649	down	SCNN1D	0.0223844	-0.590429	down
MSTRG.118080.2	2.83e-16	6.22484	up	ATIC	0.0121023	0.651519	up
MSTRG.118080.2	2.83e-16	6.22484	up	ITIH2	0.00536461	0.606774	up
MSTRG.118080.2	2.83e-16	6.22484	up	LOC110356702	0.0129015	0.64086	up
MSTRG.68052.50	7.35e-16	-6.37589	down	Columba_livia_newGene_48019	0.00236838	-0.633233	down
MSTRG.68052.50	7.35e-16	-6.37589	down	LOC102087220	0.000126059	-1.01643	down
MSTRG.68052.50	7.35e-16	-6.37589	down	LOC102091110	0.000622015	-0.752644	down
MSTRG.108236.3	6.01e-15	-5.93865	down	LOC102087220	0.000126059	-1.01643	down
MSTRG.76292.11	2.37e-14	5.93328	up	Columba_livia_newGene_79021	0.00143398	0.807174	up
MSTRG.12518.65	5.51e-14	-5.63596	down	OSR2	0.0105762	-0.673746	down
MSTRG.143749.25	6.23e-14	-5.9724	down	Columba_livia_newGene_7462	0.00687474	-0.686514	down
MSTRG.143749.25	6.23e-14	-5.9724	down	ANGPT4	4.34e-05	-0.747777	down
MSTRG.16386.20	1.66e-12	5.39314	up	Columba_livia_newGene_39315	4.46e-05	1.01356	up
MSTRG.53370.24	3.17e-12	-5.09701	down	LOC102087220	0.000126059	-1.01643	down
MSTRG.91046.28	3.88e-12	5.49778	up	ITIH2	0.00536461	0.606774	up
MSTRG.91046.28	3.88e-12	5.49778	up	PRG4	0.00158514	0.80874	up
MSTRG.39405.36	1.2e-11	5.30468	up	ATIC	0.0121023	0.651519	up
MSTRG.39405.36	1.2e-11	5.30468	up	ITIH2	0.00536461	0.606774	up
MSTRG.39405.36	1.2e-11	5.30468	up	LOC110356702	0.0129015	0.64086	up
MSTRG.39405.36	1.2e-11	5.30468	up	MATN3	0.0100097	0.684645	up
MSTRG.39405.36	1.2e-11	5.30468	up	PRG4	0.00158514	0.80874	up
MSTRG.39405.36	1.2e-11	5.30468	up	TRMT10C	3.35e-05	1.0054	up
MSTRG.155918.1	4.35e-11	-4.52256	down	TMEM26	0.0224488	-0.607009	down
MSTRG.155918.1	4.35e-11	-4.52256	down	TMEM71	0.00304214	-0.701151	down
MSTRG.53056.28	2.92e-10	-5.05131	down	Columba_livia_newGene_32902	0.00383154	-0.775808	down
MSTRG.53056.28	2.92e-10	-5.05131	down	Columba_livia_newGene_75532	5.43e-17	-2.20116	down
MSTRG.35078.1	1.36e-09	2.16863	up	ARMC10	7.54e-08	0.728986	up
MSTRG.35078.1	1.36e-09	2.16863	up	OSR2	0.0105762	-0.673746	down
MSTRG.130999.2	1.49e-09	-4.81874	down	Columba_livia_newGene_14909	7.37e-09	-1.48395	down
MSTRG.130999.2	1.49e-09	-4.81874	down	LOC102091110	0.000622015	-0.752644	down
MSTRG.130999.2	1.49e-09	-4.81874	down	MCOLN3	0.00137756	-0.843756	down
MSTRG.143818.7	2.87e-09	4.86528	up	HAO1	0.0012013	0.868398	up
MSTRG.18728.2	2.88e-09	3.91266	up	LOC102091695	0.00128437	0.85974	up
MSTRG.114049.50	3.13e-09	-5.04724	down	Columba_livia_newGene_48019	0.00236838	-0.633233	down
MSTRG.114049.50	3.13e-09	-5.04724	down	LOC102087220	0.000126059	-1.01643	down
MSTRG.153424.14	7.72e-09	-4.61337	down	LOC102087220	0.000126059	-1.01643	down
MSTRG.160675.19	1.13e-08	-4.68081	down	NUPL2	0.00173535	-0.683571	down
MSTRG.104530.7	1.11e-07	-4.2735	down	Columba_livia_newGene_44380	0.0174867	0.623768	up
MSTRG.104530.7	1.11e-07	-4.2735	down	LOC110357300	0.00762467	-0.703293	down
MSTRG.27215.93	2.02e-07	4.23184	up	OTUD1	0.0110348	0.640488	up
MSTRG.153522.2	4.33e-07	4.20666	up	Columba_livia_newGene_33639	0.000399649	0.883159	up
MSTRG.153522.2	4.33e-07	4.20666	up	CLU	0.0134045	0.646092	up
MSTRG.153522.2	4.33e-07	4.20666	up	LOC110356702	0.0129015	0.64086	up
MSTRG.88755.2	5.11e-07	2.16542	up	SFT2D2	2.24e-07	1.28303	up
MSTRG.119139.1	5.13e-07	-4.19375	down	LOC102087220	0.000126059	-1.01643	down
MSTRG.156449.1	1.2e-06	3.97438	up	TXLNB	0.00127758	0.659757	up
MSTRG.127643.1	4.42e-06	1.60023	up	LOC110361972	6.67e-12	1.82452	up
MSTRG.80578.5	4.89e-06	3.61052	up	TRMT10C	3.35e-05	1.0054	up
MSTRG.142573.14	5.28e-06	-3.68781	down	Columba_livia_newGene_32902	0.00383154	-0.775808	down
MSTRG.142573.14	5.28e-06	-3.68781	down	Columba_livia_newGene_75532	5.43e-17	-2.20116	down
MSTRG.142573.14	5.28e-06	-3.68781	down	LOC102090444	0.00158956	-0.841136	down
MSTRG.44182.5	1.2e-05	3.69114	up	HAO1	0.0012013	0.868398	up
MSTRG.15481.2	2.13e-05	-3.68463	down	TMEM71	0.00304214	-0.701151	down
MSTRG.102015.2	3.04e-05	3.59953	up	ATIC	0.0121023	0.651519	up
MSTRG.102015.2	3.04e-05	3.59953	up	LOC110356702	0.0129015	0.64086	up
MSTRG.102015.2	3.04e-05	3.59953	up	TRMT10C	3.35e-05	1.0054	up
MSTRG.94558.4	3.83e-05	-3.04627	down	Columba_livia_newGene_71999	0.0271759	-0.592004	down
MSTRG.65445.2	5.58e-05	3.45113	up	ATIC	0.0121023	0.651519	up
MSTRG.65445.2	5.58e-05	3.45113	up	LOC102086527	0.00205719	0.796448	up
MSTRG.65445.2	5.58e-05	3.45113	up	LOC110356702	0.0129015	0.64086	up
MSTRG.101447.13	0.00010246	-3.37164	down	DNASE1L3	0.0200231	-0.588797	down
MSTRG.25745.28	0.000118429	-3.38628	down	Columba_livia_newGene_71999	0.0271759	-0.592004	down
MSTRG.25745.28	0.000118429	-3.38628	down	LOC102087220	0.000126059	-1.01643	down
MSTRG.44760.1	0.000128632	3.28446	up	FGG	0.000520088	0.85729	up
MSTRG.105872.2	0.000141018	2.1883	up	ATIC	0.0121023	0.651519	up
MSTRG.105872.2	0.000141018	2.1883	up	LOC110356702	0.0129015	0.64086	up
MSTRG.21927.56	0.000153068	2.3123	up	LOC102086527	0.00205719	0.796448	up
MSTRG.21927.56	0.000153068	2.3123	up	LOC110356702	0.0129015	0.64086	up
MSTRG.100022.3	0.000162749	3.2817	up	OAT	0.00488384	0.632699	up
MSTRG.46202.1	0.000236619	1.14189	up	NFIL3	0.00805076	0.676549	up
MSTRG.36087.27	0.000382354	-2.91434	down	Columba_livia_newGene_71999	0.0271759	-0.592004	down
MSTRG.36087.27	0.000382354	-2.91434	down	PHACTR4	0.0192576	-0.588041	down
MSTRG.36087.27	0.000382354	-2.91434	down	TG	0.00780831	-0.647043	down
MSTRG.35434.2	0.00051574	1.89201	up	ADPRM	0.0189164	0.622532	up
MSTRG.1337.6	0.000540177	2.60016	up	C7	0.00333339	0.780639	up
MSTRG.1337.6	0.000540177	2.60016	up	NAMPT	0.00226213	0.79275	up
MSTRG.120327.1	0.000540235	-1.02944	down	DNASE1L3	0.0200231	-0.588797	down
MSTRG.120327.1	0.000540235	-1.02944	down	MAML1	2.91e-05	-0.80229	down
MSTRG.153518.1	0.000548841	2.79035	up	Columba_livia_newGene_33639	0.000399649	0.883159	up
MSTRG.32691.1	0.000592676	-2.41338	down	SCNN1D	0.0223844	-0.590429	down
MSTRG.121455.1	0.000605553	-2.6364	down	Columba_livia_newGene_78293	2.97e-06	-0.92685	down
MSTRG.121455.1	0.000605553	-2.6364	down	Columba_livia_newGene_86145	0.00287028	-0.773094	down
MSTRG.135355.3	0.000622969	-3.02077	down	Columba_livia_newGene_57840	0.0141231	-0.652163	down
MSTRG.63351.21	0.00065519	2.86575	up	ATIC	0.0121023	0.651519	up
MSTRG.63351.21	0.00065519	2.86575	up	ITIH2	0.00536461	0.606774	up
MSTRG.63351.21	0.00065519	2.86575	up	MATN3	0.0100097	0.684645	up
MSTRG.63351.21	0.00065519	2.86575	up	PRG4	0.00158514	0.80874	up
MSTRG.63351.21	0.00065519	2.86575	up	TRMT10C	3.35e-05	1.0054	up
MSTRG.148975.2	0.000754114	2.6481	up	ATIC	0.0121023	0.651519	up
MSTRG.148975.2	0.000754114	2.6481	up	LOC110356702	0.0129015	0.64086	up
MSTRG.108159.2	0.00083113	2.76497	up	RETREG1	0.019065	0.627721	up
MSTRG.104435.18	0.000832399	2.94187	up	Columba_livia_newGene_2025	0.012751	0.623269	up
MSTRG.104435.18	0.000832399	2.94187	up	ADPRM	0.0189164	0.622532	up
MSTRG.12083.1	0.000852562	1.2337	up	SERINC5	1.12e-20	1.72998	up
MSTRG.29728.1	0.000918684	2.66232	up	HSF2BP	0.0245123	0.6032	up
MSTRG.29728.1	0.000918684	2.66232	up	TRMT10C	3.35e-05	1.0054	up
MSTRG.4510.1	0.00104254	2.78119	up	ITIH2	0.00536461	0.606774	up
MSTRG.4510.1	0.00104254	2.78119	up	LOC110356702	0.0129015	0.64086	up
MSTRG.4510.1	0.00104254	2.78119	up	MATN3	0.0100097	0.684645	up
MSTRG.4510.1	0.00104254	2.78119	up	PRG4	0.00158514	0.80874	up
MSTRG.46447.1	0.00106872	2.3446	up	NUDCD3	0.00267153	0.624398	up
MSTRG.2116.31	0.00116686	2.84471	up	LOC102091110	0.000622015	-0.752644	down
MSTRG.53730.3	0.00123134	-1.47848	down	Columba_livia_newGene_64121	0.0227935	-0.591142	down
MSTRG.15541.42	0.00126017	2.72453	up	Columba_livia_newGene_33639	0.000399649	0.883159	up
MSTRG.109472.3	0.00184457	-2.17731	down	Columba_livia_newGene_71999	0.0271759	-0.592004	down
MSTRG.83834.1	0.00198055	-1.32693	down	Columba_livia_newGene_78293	2.97e-06	-0.92685	down
MSTRG.83834.1	0.00198055	-1.32693	down	MCOLN3	0.00137756	-0.843756	down
MSTRG.132746.84	0.00198759	2.72628	up	TRMT10C	3.35e-05	1.0054	up
MSTRG.49097.2	0.002081	-2.1708	down	Columba_livia_newGene_7462	0.00687474	-0.686514	down
MSTRG.98418.1	0.00212178	1.52308	up	Columba_livia_newGene_93396	0.00135399	0.848649	up
MSTRG.66909.86	0.00234151	-1.57763	down	Columba_livia_newGene_75532	5.43e-17	-2.20116	down
MSTRG.66909.86	0.00234151	-1.57763	down	LOC102096675	0.0033359	-0.787269	down
MSTRG.25509.1	0.00235139	1.98066	up	OTUD1	0.0110348	0.640488	up
MSTRG.142352.1	0.0024311	-1.70532	down	LOC102087220	0.000126059	-1.01643	down
MSTRG.3204.1	0.00247682	-1.84752	down	LOC102087368	0.000498842	-0.86599	down
MSTRG.3204.1	0.00247682	-1.84752	down	LOC110363298	0.00490629	-0.733428	down
MSTRG.133001.1	0.00248081	2.65059	up	NAMPT	0.00226213	0.79275	up
MSTRG.65396.1	0.00250192	-1.65988	down	LOC102091110	0.000622015	-0.752644	down
MSTRG.1303.1	0.00259459	2.24738	up	NAMPT	0.00226213	0.79275	up
MSTRG.146468.1	0.00267901	-2.02635	down	LOC102087220	0.000126059	-1.01643	down
MSTRG.142466.1	0.00269289	-1.25627	down	NECAB3	0.0104411	-0.68529	down
MSTRG.142466.1	0.00269289	-1.25627	down	SNAP91	0.0148492	-0.647617	down
MSTRG.141575.3	0.00291864	-2.55835	down	Columba_livia_newGene_48019	0.00236838	-0.633233	down
MSTRG.141575.3	0.00291864	-2.55835	down	Columba_livia_newGene_86046	0.0028118	-0.739474	down
MSTRG.141575.3	0.00291864	-2.55835	down	LOC102091110	0.000622015	-0.752644	down
MSTRG.156087.1	0.00295104	-2.48648	down	LOC102096675	0.0033359	-0.787269	down
MSTRG.84552.20	0.00303582	2.58697	up	ATIC	0.0121023	0.651519	up
MSTRG.84552.20	0.00303582	2.58697	up	CLU	0.0134045	0.646092	up
MSTRG.84552.20	0.00303582	2.58697	up	ITIH2	0.00536461	0.606774	up
MSTRG.84552.20	0.00303582	2.58697	up	LOC110356702	0.0129015	0.64086	up
MSTRG.84552.20	0.00303582	2.58697	up	MATN3	0.0100097	0.684645	up
MSTRG.84552.20	0.00303582	2.58697	up	PRG4	0.00158514	0.80874	up
MSTRG.25681.3	0.00322573	1.87642	up	Columba_livia_newGene_33553	0.00197938	-0.601546	down
MSTRG.31574.1	0.00326174	1.51841	up	TMEM184C	0.000954518	0.704752	up
MSTRG.52706.62	0.00333425	2.59211	up	LOC102088006	0.0114774	0.659571	up
MSTRG.148975.48	0.00350136	2.57284	up	Columba_livia_newGene_33639	0.000399649	0.883159	up
MSTRG.55338.29	0.00377082	-2.46856	down	LOC102091110	0.000622015	-0.752644	down
MSTRG.103505.1	0.0039662	-0.614069	down	TAF1D	0.0063712	-0.636529	down
MSTRG.137579.4	0.00399606	2.54057	up	Columba_livia_newGene_33639	0.000399649	0.883159	up
MSTRG.156949.2	0.00403832	2.53356	up	Columba_livia_newGene_33639	0.000399649	0.883159	up
MSTRG.44753.34	0.00407158	2.52974	up	Columba_livia_newGene_33639	0.000399649	0.883159	up
MSTRG.25503.4	0.00409167	2.53582	up	OTUD1	0.0110348	0.640488	up
MSTRG.94558.3	0.00412942	-2.44529	down	ANGPT1	0.0176244	-0.632345	down
MSTRG.94558.3	0.00412942	-2.44529	down	DUSP28	0.0115255	-0.617685	down
MSTRG.135145.3	0.00416488	2.52647	up	Columba_livia_newGene_33639	0.000399649	0.883159	up
MSTRG.149638.1	0.00422065	2.27713	up	ATIC	0.0121023	0.651519	up
MSTRG.149638.1	0.00422065	2.27713	up	ITIH2	0.00536461	0.606774	up
MSTRG.149638.1	0.00422065	2.27713	up	LOC110356702	0.0129015	0.64086	up
MSTRG.149638.1	0.00422065	2.27713	up	MATN3	0.0100097	0.684645	up
MSTRG.149638.1	0.00422065	2.27713	up	PRG4	0.00158514	0.80874	up
MSTRG.24262.23	0.0043898	2.50717	up	HAO1	0.0012013	0.868398	up
MSTRG.51694.19	0.00449584	2.05002	up	ADORA2A	0.00139893	0.721521	up
MSTRG.51694.19	0.00449584	2.05002	up	LOC102086527	0.00205719	0.796448	up
MSTRG.7630.9	0.00454984	-0.869088	down	SNAP91	0.0148492	-0.647617	down
MSTRG.86635.4	0.00479929	1.87265	up	SNAP91	0.0148492	-0.647617	down
MSTRG.153724.1	0.00500417	-2.47911	down	Columba_livia_newGene_33783	0.0164157	-0.633106	down
MSTRG.18086.1	0.00516215	1.60305	up	OSR2	0.0105762	-0.673746	down
MSTRG.64271.1	0.00532612	-1.48408	down	ANGPT4	4.34e-05	-0.747777	down
MSTRG.67187.23	0.00549533	2.44104	up	Columba_livia_newGene_25824	0.0166123	0.641811	up
MSTRG.81687.3	0.00583162	-0.887623	down	LOC102087220	0.000126059	-1.01643	down
MSTRG.116702.17	0.00589847	2.20359	up	Columba_livia_newGene_58306	6.95e-05	1.03843	up
MSTRG.116702.17	0.00589847	2.20359	up	C7	0.00333339	0.780639	up
MSTRG.5230.44	0.00601783	2.25596	up	LOC102089266	0.000387776	-0.884369	down
MSTRG.43415.88	0.00616307	2.41906	up	LOC102086527	0.00205719	0.796448	up
MSTRG.77098.1	0.0065639	1.33244	up	OTUD1	0.0110348	0.640488	up
MSTRG.21044.22	0.00697408	2.38301	up	Columba_livia_newGene_58306	6.95e-05	1.03843	up
MSTRG.21044.22	0.00697408	2.38301	up	C7	0.00333339	0.780639	up
MSTRG.156449.2	0.00725519	2.36826	up	ITIH2	0.00536461	0.606774	up
MSTRG.156449.2	0.00725519	2.36826	up	LOC102086527	0.00205719	0.796448	up
MSTRG.156449.2	0.00725519	2.36826	up	LOC110356702	0.0129015	0.64086	up
MSTRG.156449.2	0.00725519	2.36826	up	PRG4	0.00158514	0.80874	up
MSTRG.123018.6	0.00734398	1.81426	up	Columba_livia_newGene_46620	0.00550331	0.660869	up
MSTRG.3076.1	0.00776655	-1.34736	down	LOC102096675	0.0033359	-0.787269	down
MSTRG.21194.2	0.00785101	2.34771	up	FGG	0.000520088	0.85729	up
MSTRG.65397.4	0.00785946	-2.28713	down	LOC102087220	0.000126059	-1.01643	down
MSTRG.2680.20	0.00788442	-2.04006	down	CUNH1orf74	0.0129077	-0.644495	down
MSTRG.14657.1	0.00790674	2.34596	up	LOC102086527	0.00205719	0.796448	up
MSTRG.14657.1	0.00790674	2.34596	up	LOC110356702	0.0129015	0.64086	up
MSTRG.39640.10	0.00807726	-0.748329	down	Columba_livia_newGene_78293	2.97e-06	-0.92685	down
MSTRG.39640.10	0.00807726	-0.748329	down	LOC102091110	0.000622015	-0.752644	down
MSTRG.39640.10	0.00807726	-0.748329	down	MCOLN3	0.00137756	-0.843756	down
MSTRG.105622.45	0.00820721	2.33467	up	HAO1	0.0012013	0.868398	up
MSTRG.100603.49	0.00841262	-2.05261	down	PHACTR4	0.0192576	-0.588041	down
MSTRG.100603.49	0.00841262	-2.05261	down	TG	0.00780831	-0.647043	down
MSTRG.24624.1	0.00846395	-1.37889	down	LOC110357300	0.00762467	-0.703293	down
MSTRG.132865.10	0.00853467	-2.32311	down	PHACTR4	0.0192576	-0.588041	down
MSTRG.132865.10	0.00853467	-2.32311	down	TG	0.00780831	-0.647043	down
MSTRG.3531.2	0.00863901	-1.57693	down	AMT	0.00923137	-0.635735	down
MSTRG.42588.1	0.00879046	-1.18471	down	LOC102091110	0.000622015	-0.752644	down
MSTRG.45782.1	0.00884864	1.36291	up	LOC102086527	0.00205719	0.796448	up
MSTRG.56028.1	0.00886496	-1.51138	down	NUDCD3	0.00267153	0.624398	up
MSTRG.153653.2	0.00892033	2.30878	up	HAO1	0.0012013	0.868398	up
MSTRG.42991.17	0.00902834	2.29585	up	TRMT10C	3.35e-05	1.0054	up
MSTRG.143046.35	0.0090693	1.43875	up	Columba_livia_newGene_39315	4.46e-05	1.01356	up
MSTRG.143046.35	0.0090693	1.43875	up	Columba_livia_newGene_59569	0.00582096	0.714712	up
MSTRG.143046.35	0.0090693	1.43875	up	LOC102089105	5.55e-05	1.03405	up
MSTRG.41962.28	0.00914202	-1.42959	down	ANGPT4	4.34e-05	-0.747777	down
MSTRG.9710.2	0.00955404	-1.89779	down	SCNN1D	0.0223844	-0.590429	down
MSTRG.9710.2	0.00955404	-1.89779	down	SLC35F2	0.000253041	-0.705325	down
MSTRG.42561.1	0.00955605	-1.44263	down	Columba_livia_newGene_78293	2.97e-06	-0.92685	down
MSTRG.42561.1	0.00955605	-1.44263	down	LOC102091110	0.000622015	-0.752644	down
MSTRG.55991.1	0.00990442	1.21017	up	SERINC5	1.12e-20	1.72998	up
MSTRG.49989.1	0.00991769	-1.99865	down	Columba_livia_newGene_14909	7.37e-09	-1.48395	down
MSTRG.49989.1	0.00991769	-1.99865	down	CCDC181	0.00109892	-0.871314	down
MSTRG.2984.2	0.0101117	2.2707	up	ADPRM	0.0189164	0.622532	up
MSTRG.82779.33	0.0101534	1.33032	up	TRMT10C	3.35e-05	1.0054	up
MSTRG.48190.1	0.0103209	-1.42791	down	LOC110357300	0.00762467	-0.703293	down
MSTRG.53370.17	0.0103372	2.23958	up	C3	0.00664527	0.727569	up
MSTRG.53370.17	0.0103372	2.23958	up	NAMPT	0.00226213	0.79275	up
MSTRG.148153.1	0.0107605	-0.851439	down	Columba_livia_newGene_71999	0.0271759	-0.592004	down
MSTRG.148153.1	0.0107605	-0.851439	down	LRRC28	0.0166293	-0.585196	down
MSTRG.153686.42	0.0107755	-2.24724	down	LOC102087220	0.000126059	-1.01643	down
MSTRG.88959.2	0.0108494	-2.15873	down	Columba_livia_newGene_86046	0.0028118	-0.739474	down
MSTRG.24566.16	0.0110684	-1.9567	down	Columba_livia_newGene_78293	2.97e-06	-0.92685	down
MSTRG.24566.16	0.0110684	-1.9567	down	LOC102091110	0.000622015	-0.752644	down
MSTRG.136168.1	0.0111604	1.16142	up	Columba_livia_newGene_25824	0.0166123	0.641811	up
MSTRG.85382.1	0.0112471	2.09531	up	ATIC	0.0121023	0.651519	up
MSTRG.85382.1	0.0112471	2.09531	up	ITIH2	0.00536461	0.606774	up
MSTRG.85382.1	0.0112471	2.09531	up	LOC110356702	0.0129015	0.64086	up
MSTRG.85382.1	0.0112471	2.09531	up	MATN3	0.0100097	0.684645	up
MSTRG.85382.1	0.0112471	2.09531	up	PRG4	0.00158514	0.80874	up
MSTRG.21650.1	0.0112554	1.05267	up	LOC102087220	0.000126059	-1.01643	down
MSTRG.58299.1	0.0115557	0.92463	up	LOC102086527	0.00205719	0.796448	up
MSTRG.133478.20	0.0115865	1.913	up	LOC102084914	0.00401634	0.685925	up
MSTRG.58271.23	0.0116517	0.739254	up	Columba_livia_newGene_46620	0.00550331	0.660869	up
MSTRG.58271.23	0.0116517	0.739254	up	FGG	0.000520088	0.85729	up
MSTRG.32413.1	0.0117041	-1.48255	down	Columba_livia_newGene_86145	0.00287028	-0.773094	down
MSTRG.6244.1	0.0117458	-1.56139	down	Columba_livia_newGene_71999	0.0271759	-0.592004	down
MSTRG.148961.1	0.0120722	-1.29007	down	Columba_livia_newGene_33783	0.0164157	-0.633106	down
MSTRG.73954.1	0.012148	2.21334	up	ATIC	0.0121023	0.651519	up
MSTRG.73954.1	0.012148	2.21334	up	ITIH2	0.00536461	0.606774	up
MSTRG.73954.1	0.012148	2.21334	up	LOC110356702	0.0129015	0.64086	up
MSTRG.73954.1	0.012148	2.21334	up	PRG4	0.00158514	0.80874	up
MSTRG.81727.1	0.0124915	-0.949906	down	PYGO1	0.0257325	-0.588915	down
MSTRG.65404.1	0.0125073	-1.39823	down	LOC102087220	0.000126059	-1.01643	down
MSTRG.65404.1	0.0125073	-1.39823	down	LOC102093616	0.00132307	-0.742556	down
MSTRG.1647.1	0.012663	1.10847	up	PYGO1	0.0257325	-0.588915	down
MSTRG.122840.4	0.0130036	-2.13607	down	PHACTR4	0.0192576	-0.588041	down
MSTRG.122840.4	0.0130036	-2.13607	down	TG	0.00780831	-0.647043	down
MSTRG.34945.2	0.0130485	2.18825	up	LOC102088006	0.0114774	0.659571	up
MSTRG.134129.1	0.0135496	1.20249	up	BLCAP	0.00100494	0.872248	up
MSTRG.153229.4	0.0136505	-1.61045	down	SCNN1D	0.0223844	-0.590429	down
MSTRG.130780.32	0.0138908	2.11248	up	ITIH2	0.00536461	0.606774	up
MSTRG.130780.32	0.0138908	2.11248	up	LOC110356702	0.0129015	0.64086	up
MSTRG.130780.32	0.0138908	2.11248	up	MATN3	0.0100097	0.684645	up
MSTRG.130780.32	0.0138908	2.11248	up	PRG4	0.00158514	0.80874	up
MSTRG.102810.19	0.0139124	2.16712	up	FGG	0.000520088	0.85729	up
MSTRG.661.1	0.0139395	0.721292	up	LOC102086527	0.00205719	0.796448	up
MSTRG.74616.3	0.0142716	2.16129	up	GPR1	0.0133185	0.661783	up
MSTRG.55330.1	0.0142961	1.5618	up	HAO1	0.0012013	0.868398	up
MSTRG.137803.10	0.0144032	1.126	up	Columba_livia_newGene_46620	0.00550331	0.660869	up
MSTRG.99152.22	0.0150685	1.43875	up	TXLNB	0.00127758	0.659757	up
MSTRG.89544.57	0.0151835	1.43992	up	LOC102088960	0.000627017	0.89303	up
MSTRG.30231.1	0.0155393	2.01477	up	ITIH2	0.00536461	0.606774	up
MSTRG.30231.1	0.0155393	2.01477	up	LOC110356702	0.0129015	0.64086	up
MSTRG.30231.1	0.0155393	2.01477	up	MATN3	0.0100097	0.684645	up
MSTRG.30231.1	0.0155393	2.01477	up	PRG4	0.00158514	0.80874	up
MSTRG.149341.1	0.0161897	-0.946671	down	LOC110361972	6.67e-12	1.82452	up
MSTRG.149341.1	0.0161897	-0.946671	down	SNAP91	0.0148492	-0.647617	down
MSTRG.18312.1	0.0166021	2.04622	up	ATIC	0.0121023	0.651519	up
MSTRG.18312.1	0.0166021	2.04622	up	ITIH2	0.00536461	0.606774	up
MSTRG.18312.1	0.0166021	2.04622	up	LOC110356702	0.0129015	0.64086	up
MSTRG.18312.1	0.0166021	2.04622	up	MATN3	0.0100097	0.684645	up
MSTRG.18312.1	0.0166021	2.04622	up	PRG4	0.00158514	0.80874	up
MSTRG.18312.1	0.0166021	2.04622	up	TRMT10C	3.35e-05	1.0054	up
MSTRG.156018.37	0.0168651	-2.02668	down	PHACTR4	0.0192576	-0.588041	down
MSTRG.156018.37	0.0168651	-2.02668	down	TG	0.00780831	-0.647043	down
MSTRG.80486.31	0.0169854	-1.65903	down	Columba_livia_newGene_75532	5.43e-17	-2.20116	down
MSTRG.80486.31	0.0169854	-1.65903	down	CUNH1orf74	0.0129077	-0.644495	down
MSTRG.80486.31	0.0169854	-1.65903	down	LOC106146053	0.0219447	-0.610294	down
MSTRG.57798.1	0.0170064	-1.99549	down	Columba_livia_newGene_33553	0.00197938	-0.601546	down
MSTRG.4890.1	0.0170142	1.01882	up	LOC110356702	0.0129015	0.64086	up
MSTRG.125328.4	0.0174544	1.159	up	ATIC	0.0121023	0.651519	up
MSTRG.125328.4	0.0174544	1.159	up	LOC110356702	0.0129015	0.64086	up
MSTRG.49074.1	0.017492	1.2911	up	Columba_livia_newGene_58306	6.95e-05	1.03843	up
MSTRG.24790.2	0.0176411	-1.72783	down	Columba_livia_newGene_71999	0.0271759	-0.592004	down
MSTRG.24790.2	0.0176411	-1.72783	down	PHACTR4	0.0192576	-0.588041	down
MSTRG.24790.2	0.0176411	-1.72783	down	TG	0.00780831	-0.647043	down
MSTRG.148430.3	0.0180946	2.08237	up	LOC102086527	0.00205719	0.796448	up
MSTRG.148430.3	0.0180946	2.08237	up	LOC110356702	0.0129015	0.64086	up
MSTRG.25511.1	0.0185146	1.23579	up	Columba_livia_newGene_25824	0.0166123	0.641811	up
MSTRG.25511.1	0.0185146	1.23579	up	OTUD1	0.0110348	0.640488	up
MSTRG.9710.3	0.0185797	1.57394	up	ATIC	0.0121023	0.651519	up
MSTRG.9710.3	0.0185797	1.57394	up	ITIH2	0.00536461	0.606774	up
MSTRG.9710.3	0.0185797	1.57394	up	LOC110356702	0.0129015	0.64086	up
MSTRG.9710.3	0.0185797	1.57394	up	MATN3	0.0100097	0.684645	up
MSTRG.9710.3	0.0185797	1.57394	up	PRG4	0.00158514	0.80874	up
MSTRG.9710.3	0.0185797	1.57394	up	TRMT10C	3.35e-05	1.0054	up
MSTRG.135045.4	0.018755	-1.30482	down	CLU	0.0134045	0.646092	up
MSTRG.2462.2	0.0188846	1.66116	up	ATIC	0.0121023	0.651519	up
MSTRG.2462.2	0.0188846	1.66116	up	CLU	0.0134045	0.646092	up
MSTRG.2462.2	0.0188846	1.66116	up	LOC110356702	0.0129015	0.64086	up
MSTRG.55570.5	0.0190557	2.06091	up	Columba_livia_newGene_33639	0.000399649	0.883159	up
MSTRG.39405.39	0.0190726	2.06131	up	ATIC	0.0121023	0.651519	up
MSTRG.39405.39	0.0190726	2.06131	up	ITIH2	0.00536461	0.606774	up
MSTRG.39405.39	0.0190726	2.06131	up	LOC110356702	0.0129015	0.64086	up
MSTRG.39405.39	0.0190726	2.06131	up	MATN3	0.0100097	0.684645	up
MSTRG.39405.39	0.0190726	2.06131	up	PRG4	0.00158514	0.80874	up
MSTRG.39405.39	0.0190726	2.06131	up	TRMT10C	3.35e-05	1.0054	up
MSTRG.117323.1	0.0193558	-1.15252	down	Columba_livia_newGene_7462	0.00687474	-0.686514	down
MSTRG.45678.16	0.0195348	2.05366	up	HSPH1	0.000313934	0.952702	up
MSTRG.45678.16	0.0195348	2.05366	up	LOC110355493	0.0185943	0.60468	up
MSTRG.4513.1	0.0195628	2.03882	up	ATIC	0.0121023	0.651519	up
MSTRG.4513.1	0.0195628	2.03882	up	ITIH2	0.00536461	0.606774	up
MSTRG.4513.1	0.0195628	2.03882	up	LOC110356702	0.0129015	0.64086	up
MSTRG.4513.1	0.0195628	2.03882	up	MATN3	0.0100097	0.684645	up
MSTRG.4513.1	0.0195628	2.03882	up	PRG4	0.00158514	0.80874	up
MSTRG.136018.25	0.0197766	-2.03774	down	DFFA	0.0110162	-0.610268	down
MSTRG.84442.19	0.0201387	-1.87956	down	ANGPT1	0.0176244	-0.632345	down
MSTRG.84442.19	0.0201387	-1.87956	down	DUSP28	0.0115255	-0.617685	down
MSTRG.84442.19	0.0201387	-1.87956	down	LOC106146053	0.0219447	-0.610294	down
MSTRG.97480.11	0.0205258	1.94741	up	Columba_livia_newGene_46297	0.00412324	0.63175	up
MSTRG.111496.41	0.0207907	-0.882164	down	Columba_livia_newGene_7462	0.00687474	-0.686514	down
MSTRG.111496.41	0.0207907	-0.882164	down	ANGPT4	4.34e-05	-0.747777	down
MSTRG.111496.41	0.0207907	-0.882164	down	MFSD4B	0.0091125	0.698208	up
MSTRG.150251.1	0.0210058	-0.81371	down	Columba_livia_newGene_31706	0.0196342	-0.612578	down
MSTRG.106410.2	0.0215446	-1.98252	down	PHACTR4	0.0192576	-0.588041	down
MSTRG.106410.2	0.0215446	-1.98252	down	TG	0.00780831	-0.647043	down
MSTRG.101075.1	0.0215718	-2.02669	down	LOC102090444	0.00158956	-0.841136	down
MSTRG.154980.1	0.0216042	1.09327	up	Columba_livia_newGene_25824	0.0166123	0.641811	up
MSTRG.154980.1	0.0216042	1.09327	up	OTUD1	0.0110348	0.640488	up
MSTRG.77850.9	0.0218535	2.0175	up	HAO1	0.0012013	0.868398	up
MSTRG.117449.2	0.0219375	2.0219	up	GPR1	0.0133185	0.661783	up
MSTRG.8336.10	0.0220799	-1.97094	down	PHACTR4	0.0192576	-0.588041	down
MSTRG.8336.10	0.0220799	-1.97094	down	TG	0.00780831	-0.647043	down
MSTRG.12077.2	0.0222407	1.90984	up	ATIC	0.0121023	0.651519	up
MSTRG.12077.2	0.0222407	1.90984	up	ITIH2	0.00536461	0.606774	up
MSTRG.12077.2	0.0222407	1.90984	up	LOC110356702	0.0129015	0.64086	up
MSTRG.12077.2	0.0222407	1.90984	up	PRG4	0.00158514	0.80874	up
MSTRG.53059.2	0.0223094	-1.93062	down	Columba_livia_newGene_48019	0.00236838	-0.633233	down
MSTRG.150645.41	0.0224268	-1.58651	down	PHACTR4	0.0192576	-0.588041	down
MSTRG.150645.41	0.0224268	-1.58651	down	TG	0.00780831	-0.647043	down
MSTRG.99310.35	0.0225122	1.31467	up	FGG	0.000520088	0.85729	up
MSTRG.56241.2	0.0226098	-1.98362	down	Columba_livia_newGene_56139	0.00757384	-0.715013	down
MSTRG.56241.2	0.0226098	-1.98362	down	LOC110361972	6.67e-12	1.82452	up
MSTRG.107773.1	0.0228489	0.878519	up	Columba_livia_newGene_51430	0.00338657	0.772301	up
MSTRG.107773.1	0.0228489	0.878519	up	LOC102086527	0.00205719	0.796448	up
MSTRG.82043.2	0.0230607	1.99564	up	ATIC	0.0121023	0.651519	up
MSTRG.82043.2	0.0230607	1.99564	up	ITIH2	0.00536461	0.606774	up
MSTRG.82043.2	0.0230607	1.99564	up	MATN3	0.0100097	0.684645	up
MSTRG.82043.2	0.0230607	1.99564	up	PRG4	0.00158514	0.80874	up
MSTRG.82043.2	0.0230607	1.99564	up	TMEM110	0.00721139	-0.624849	down
MSTRG.82043.2	0.0230607	1.99564	up	TRMT10C	3.35e-05	1.0054	up
MSTRG.155194.4	0.0230685	-1.6541	down	LOC102096675	0.0033359	-0.787269	down
MSTRG.133537.1	0.02346	1.18971	up	MATN3	0.0100097	0.684645	up
MSTRG.133537.1	0.02346	1.18971	up	RETREG1	0.019065	0.627721	up
MSTRG.133537.1	0.02346	1.18971	up	TRMT10C	3.35e-05	1.0054	up
MSTRG.101427.1	0.0242322	-0.864069	down	Columba_livia_newGene_31706	0.0196342	-0.612578	down
MSTRG.144615.2	0.025046	1.86476	up	TRMT10C	3.35e-05	1.0054	up
MSTRG.24661.2	0.0251377	-1.79137	down	Columba_livia_newGene_75532	5.43e-17	-2.20116	down
MSTRG.24661.2	0.0251377	-1.79137	down	LOC102096675	0.0033359	-0.787269	down
MSTRG.155194.1	0.0251677	1.49634	up	MATN3	0.0100097	0.684645	up
MSTRG.155194.1	0.0251677	1.49634	up	PRG4	0.00158514	0.80874	up
MSTRG.67054.2	0.0252097	1.96201	up	LOC102089597	0.0233448	0.603681	up
MSTRG.139402.25	0.0254569	1.06411	up	TRMT10C	3.35e-05	1.0054	up
MSTRG.30231.2	0.0258279	1.83851	up	CLU	0.0134045	0.646092	up
MSTRG.34887.4	0.0258401	1.45267	up	ITIH2	0.00536461	0.606774	up
MSTRG.34887.4	0.0258401	1.45267	up	LOC110356702	0.0129015	0.64086	up
MSTRG.34887.4	0.0258401	1.45267	up	PRG4	0.00158514	0.80874	up
MSTRG.80324.1	0.02648	-1.93089	down	PHACTR4	0.0192576	-0.588041	down
MSTRG.80324.1	0.02648	-1.93089	down	TG	0.00780831	-0.647043	down
MSTRG.62827.87	0.0267954	-1.94998	down	Columba_livia_newGene_86046	0.0028118	-0.739474	down
MSTRG.113346.1	0.0270196	1.59133	up	HAO1	0.0012013	0.868398	up
MSTRG.147297.14	0.0277165	-1.86924	down	Columba_livia_newGene_5204	0.0243894	-0.602918	down
MSTRG.147297.14	0.0277165	-1.86924	down	Columba_livia_newGene_75532	5.43e-17	-2.20116	down
MSTRG.146439.7	0.0281387	1.70662	up	LOC110356702	0.0129015	0.64086	up
MSTRG.93263.4	0.0284636	1.31762	up	RCAN3	0.0161426	0.590296	up
MSTRG.134822.1	0.0284709	1.31363	up	ZCCHC10	0.00828475	-0.607348	down
MSTRG.48565.6	0.0286816	1.69138	up	GZF1	0.00434882	0.759327	up
MSTRG.1487.1	0.0291185	1.17965	up	NAMPT	0.00226213	0.79275	up
MSTRG.114540.51	0.0291635	1.74905	up	SFT2D2	2.24e-07	1.28303	up
MSTRG.95900.1	0.0294029	-0.971274	down	Columba_livia_newGene_32902	0.00383154	-0.775808	down
MSTRG.95900.1	0.0294029	-0.971274	down	LOC102090444	0.00158956	-0.841136	down
MSTRG.160711.1	0.0298043	1.26868	up	CLU	0.0134045	0.646092	up
MSTRG.102423.4	0.0299034	1.89922	up	PAIP2B	0.00683383	0.695935	up
MSTRG.146439.9	0.0301813	-1.19578	down	DFFA	0.0110162	-0.610268	down
MSTRG.114917.1	0.0305422	1.20708	up	Columba_livia_newGene_2025	0.012751	0.623269	up
MSTRG.65153.3	0.0308744	1.88756	up	HAO1	0.0012013	0.868398	up
MSTRG.119140.1	0.0308981	-1.38961	down	PHACTR4	0.0192576	-0.588041	down
MSTRG.119140.1	0.0308981	-1.38961	down	TG	0.00780831	-0.647043	down
MSTRG.91046.30	0.0310254	-1.88948	down	LOC102091110	0.000622015	-0.752644	down
MSTRG.64318.1	0.031143	1.15861	up	LOC110356702	0.0129015	0.64086	up
MSTRG.124389.4	0.0314369	1.90033	up	RETREG1	0.019065	0.627721	up
MSTRG.39405.38	0.0318809	1.87513	up	LOC102089597	0.0233448	0.603681	up
MSTRG.39405.38	0.0318809	1.87513	up	TRMT10C	3.35e-05	1.0054	up
MSTRG.93008.10	0.0320833	-1.0357	down	Columba_livia_newGene_71999	0.0271759	-0.592004	down
MSTRG.49260.7	0.0321044	-1.64515	down	NECAB3	0.0104411	-0.68529	down
MSTRG.145840.1	0.0321925	0.930126	up	DFFA	0.0110162	-0.610268	down
MSTRG.114731.7	0.0324858	1.86952	up	ATIC	0.0121023	0.651519	up
MSTRG.114731.7	0.0324858	1.86952	up	ITIH2	0.00536461	0.606774	up
MSTRG.114731.7	0.0324858	1.86952	up	LOC110356702	0.0129015	0.64086	up
MSTRG.114731.7	0.0324858	1.86952	up	MATN3	0.0100097	0.684645	up
MSTRG.114731.7	0.0324858	1.86952	up	PRG4	0.00158514	0.80874	up
MSTRG.115628.11	0.0332235	1.85951	up	Columba_livia_newGene_58306	6.95e-05	1.03843	up
MSTRG.151580.1	0.0337541	1.39924	up	HAO1	0.0012013	0.868398	up
MSTRG.15240.48	0.0338504	1.67453	up	Columba_livia_newGene_59569	0.00582096	0.714712	up
MSTRG.113668.1	0.0338909	-0.92335	down	MCOLN3	0.00137756	-0.843756	down
MSTRG.160675.17	0.0343584	1.5727	up	LOC110356702	0.0129015	0.64086	up
MSTRG.160675.17	0.0343584	1.5727	up	PRG4	0.00158514	0.80874	up
MSTRG.31245.1	0.0345168	-0.746049	down	HSPH1	0.000313934	0.952702	up
MSTRG.154625.3	0.0345459	1.59995	up	CLU	0.0134045	0.646092	up
MSTRG.154625.3	0.0345459	1.59995	up	ITIH2	0.00536461	0.606774	up
MSTRG.154625.3	0.0345459	1.59995	up	MATN3	0.0100097	0.684645	up
MSTRG.154625.3	0.0345459	1.59995	up	PRG4	0.00158514	0.80874	up
MSTRG.142137.2	0.0346995	1.697	up	C3	0.00664527	0.727569	up
MSTRG.142137.2	0.0346995	1.697	up	NAMPT	0.00226213	0.79275	up
MSTRG.34982.57	0.0347242	1.06218	up	LOC110356702	0.0129015	0.64086	up
MSTRG.4508.1	0.0349773	1.85903	up	ATIC	0.0121023	0.651519	up
MSTRG.4508.1	0.0349773	1.85903	up	ITIH2	0.00536461	0.606774	up
MSTRG.4508.1	0.0349773	1.85903	up	LOC110356702	0.0129015	0.64086	up
MSTRG.4508.1	0.0349773	1.85903	up	MATN3	0.0100097	0.684645	up
MSTRG.4508.1	0.0349773	1.85903	up	PRG4	0.00158514	0.80874	up
MSTRG.81801.1	0.0351489	-1.42879	down	Columba_livia_newGene_86046	0.0028118	-0.739474	down
MSTRG.16885.1	0.036287	-0.835384	down	Columba_livia_newGene_86046	0.0028118	-0.739474	down
MSTRG.114849.42	0.0364936	-1.84716	down	Columba_livia_newGene_75532	5.43e-17	-2.20116	down
MSTRG.114849.42	0.0364936	-1.84716	down	ANGPT1	0.0176244	-0.632345	down
MSTRG.114849.42	0.0364936	-1.84716	down	DUSP28	0.0115255	-0.617685	down
MSTRG.114849.42	0.0364936	-1.84716	down	LOC102096675	0.0033359	-0.787269	down
MSTRG.114849.42	0.0364936	-1.84716	down	LOC106146053	0.0219447	-0.610294	down
MSTRG.25505.1	0.0371437	1.20562	up	MATN3	0.0100097	0.684645	up
MSTRG.25505.1	0.0371437	1.20562	up	OTUD1	0.0110348	0.640488	up
MSTRG.25505.1	0.0371437	1.20562	up	PRG4	0.00158514	0.80874	up
MSTRG.75345.1	0.0375591	1.73372	up	LOC102086527	0.00205719	0.796448	up
MSTRG.144591.1	0.0382593	1.57457	up	LYSMD4	0.00295671	0.752808	up
MSTRG.46424.41	0.038527	-1.64044	down	PHACTR4	0.0192576	-0.588041	down
MSTRG.46424.41	0.038527	-1.64044	down	TG	0.00780831	-0.647043	down
MSTRG.133953.4	0.0386873	1.21993	up	ITIH2	0.00536461	0.606774	up
MSTRG.133953.4	0.0386873	1.21993	up	LOC110356702	0.0129015	0.64086	up
MSTRG.133953.4	0.0386873	1.21993	up	MATN3	0.0100097	0.684645	up
MSTRG.133953.4	0.0386873	1.21993	up	PRG4	0.00158514	0.80874	up
MSTRG.22904.2	0.0389129	1.65206	up	HSPH1	0.000313934	0.952702	up
MSTRG.22904.2	0.0389129	1.65206	up	LOC110355493	0.0185943	0.60468	up
MSTRG.99155.1	0.0391901	-0.680716	down	Columba_livia_newGene_23407	0.00961931	-0.665079	down
MSTRG.4512.1	0.039361	1.80543	up	ITIH2	0.00536461	0.606774	up
MSTRG.4512.1	0.039361	1.80543	up	LOC110356702	0.0129015	0.64086	up
MSTRG.4512.1	0.039361	1.80543	up	MATN3	0.0100097	0.684645	up
MSTRG.4512.1	0.039361	1.80543	up	PRG4	0.00158514	0.80874	up
MSTRG.42330.1	0.0394236	-1.13721	down	Columba_livia_newGene_32902	0.00383154	-0.775808	down
MSTRG.42330.1	0.0394236	-1.13721	down	LOC102090444	0.00158956	-0.841136	down
MSTRG.13757.22	0.0394978	-1.81423	down	SGSM1	2.58e-05	-0.619746	down
MSTRG.26782.31	0.0405323	-0.78588	down	Columba_livia_newGene_5204	0.0243894	-0.602918	down
MSTRG.16386.8	0.0407474	1.44777	up	ITIH2	0.00536461	0.606774	up
MSTRG.16386.8	0.0407474	1.44777	up	MATN3	0.0100097	0.684645	up
MSTRG.16386.8	0.0407474	1.44777	up	PRG4	0.00158514	0.80874	up
MSTRG.3079.1	0.0411848	-1.00658	down	Columba_livia_newGene_75532	5.43e-17	-2.20116	down
MSTRG.3079.1	0.0411848	-1.00658	down	LOC102096675	0.0033359	-0.787269	down
MSTRG.88818.1	0.0413884	-0.90446	down	Columba_livia_newGene_12685	0.00175786	-0.783258	down
MSTRG.12874.1	0.0416169	1.04859	up	LOC102086527	0.00205719	0.796448	up
MSTRG.44877.4	0.0423241	-1.78047	down	Columba_livia_newGene_5204	0.0243894	-0.602918	down
MSTRG.121255.1	0.042423	-0.589368	down	TAF1D	0.0063712	-0.636529	down
MSTRG.144519.21	0.0426033	-1.12843	down	PGPEP1L	0.00444378	0.763167	up
MSTRG.52955.5	0.0426233	1.76249	up	FGG	0.000520088	0.85729	up
MSTRG.107262.2	0.0429006	-1.18087	down	Columba_livia_newGene_48019	0.00236838	-0.633233	down
MSTRG.76934.1	0.0429486	1.68686	up	LOC110356702	0.0129015	0.64086	up
MSTRG.58534.1	0.0437931	1.22272	up	RETREG1	0.019065	0.627721	up
MSTRG.83488.1	0.0439459	1.50804	up	Columba_livia_newGene_58306	6.95e-05	1.03843	up
MSTRG.67001.10	0.0439549	1.77623	up	HAO1	0.0012013	0.868398	up
MSTRG.130959.16	0.0442621	1.77478	up	Columba_livia_newGene_39315	4.46e-05	1.01356	up
MSTRG.130959.16	0.0442621	1.77478	up	LOC102089105	5.55e-05	1.03405	up
MSTRG.16386.18	0.0445234	1.74547	up	HAO1	0.0012013	0.868398	up
MSTRG.121917.1	0.0446684	-1.12274	down	LOC102090444	0.00158956	-0.841136	down
MSTRG.150247.1	0.0446793	-1.3269	down	Columba_livia_newGene_83956	0.0224257	-0.610862	down
MSTRG.150247.1	0.0446793	-1.3269	down	LOC102087220	0.000126059	-1.01643	down
MSTRG.35016.56	0.0450981	-1.73403	down	PHACTR4	0.0192576	-0.588041	down
MSTRG.35016.56	0.0450981	-1.73403	down	TG	0.00780831	-0.647043	down
MSTRG.132834.12	0.0453379	-1.70636	down	PHACTR4	0.0192576	-0.588041	down
MSTRG.132834.12	0.0453379	-1.70636	down	TG	0.00780831	-0.647043	down
MSTRG.136018.22	0.045438	1.76576	up	RETREG1	0.019065	0.627721	up
MSTRG.93947.1	0.0458296	1.52397	up	ATIC	0.0121023	0.651519	up
MSTRG.93947.1	0.0458296	1.52397	up	ITIH2	0.00536461	0.606774	up
MSTRG.93947.1	0.0458296	1.52397	up	LOC110356702	0.0129015	0.64086	up
MSTRG.93947.1	0.0458296	1.52397	up	MATN3	0.0100097	0.684645	up
MSTRG.93947.1	0.0458296	1.52397	up	PRG4	0.00158514	0.80874	up
MSTRG.93947.1	0.0458296	1.52397	up	RETREG1	0.019065	0.627721	up
MSTRG.93947.1	0.0458296	1.52397	up	TRMT10C	3.35e-05	1.0054	up
MSTRG.127234.20	0.0460739	-1.70312	down	ANGPT1	0.0176244	-0.632345	down
MSTRG.127234.20	0.0460739	-1.70312	down	DUSP28	0.0115255	-0.617685	down
MSTRG.120332.1	0.0462095	-0.76341	down	MAML1	2.91e-05	-0.80229	down
MSTRG.94981.1	0.0463142	-0.811368	down	Columba_livia_newGene_86046	0.0028118	-0.739474	down
MSTRG.94981.1	0.0463142	-0.811368	down	LOC102092663	0.000685776	0.695829	up
MSTRG.32309.1	0.0466328	0.857436	up	TRMT10C	3.35e-05	1.0054	up
MSTRG.49721.1	0.0466394	1.4779	up	ITIH2	0.00536461	0.606774	up
MSTRG.49721.1	0.0466394	1.4779	up	MATN3	0.0100097	0.684645	up
MSTRG.49721.1	0.0466394	1.4779	up	PRG4	0.00158514	0.80874	up
MSTRG.49721.1	0.0466394	1.4779	up	RETREG1	0.019065	0.627721	up
MSTRG.49721.1	0.0466394	1.4779	up	TRMT10C	3.35e-05	1.0054	up
MSTRG.26782.44	0.0475923	1.74286	up	Columba_livia_newGene_33639	0.000399649	0.883159	up
MSTRG.26782.44	0.0475923	1.74286	up	CLU	0.0134045	0.646092	up
MSTRG.114923.1	0.0479066	-1.41327	down	Columba_livia_newGene_75532	5.43e-17	-2.20116	down
MSTRG.120203.1	0.0479891	1.5314	up	ATIC	0.0121023	0.651519	up
MSTRG.120203.1	0.0479891	1.5314	up	LOC110356702	0.0129015	0.64086	up
MSTRG.127024.2	0.0489836	1.06439	up	ATIC	0.0121023	0.651519	up
MSTRG.127024.2	0.0489836	1.06439	up	LOC110356702	0.0129015	0.64086	up
MSTRG.127024.2	0.0489836	1.06439	up	MATN3	0.0100097	0.684645	up
MSTRG.140078.10	0.049226	-1.73522	down	PHACTR4	0.0192576	-0.588041	down
MSTRG.140078.10	0.049226	-1.73522	down	TG	0.00780831	-0.647043	down
MSTRG.14829.1	0.0496461	-1.11445	down	NECAB3	0.0104411	-0.68529	down

## Sheet: Supplementary S5c
Table S5c Co-expressed pairs of DE-lncRNA and DEG for S vs. T birds
LncRNA	LncRNA_Pvalue	LncRNA_log2FC	LncRNA_direction	Gene	Gene_Pvalue	Gene_log2FC	Gene_direction
MSTRG.126571.14	8.85e-31	-7.35344	down	CD101	0.00816606	-0.641903	down
MSTRG.72007.22	1.8e-26	6.59304	up	Columba_livia_newGene_48016	0.000568024	0.695207	up
MSTRG.130204.38	7.52e-23	-6.05178	down	FAAH	0.00012019	-0.60292	down
MSTRG.105872.2	3.69e-15	5.2197	up	Columba_livia_newGene_7118	0.00595836	0.632172	up
MSTRG.105872.2	3.69e-15	5.2197	up	Columba_livia_newGene_76279	0.00143518	0.692814	up
MSTRG.105872.2	3.69e-15	5.2197	up	LOC110356420	0.00533366	0.659639	up
MSTRG.105872.2	3.69e-15	5.2197	up	SAMD9L	0.0103673	0.624069	up
MSTRG.105872.2	3.69e-15	5.2197	up	SOCS3	0.00914095	0.598229	up
MSTRG.67180.2	9.81e-15	4.91643	up	Columba_livia_newGene_71448	0.000153323	0.880225	up
MSTRG.102472.2	3.02e-14	4.74594	up	IGSF21	0.00393903	0.698711	up
MSTRG.1918.42	2.78e-13	-5.12621	down	WDR20	0.00297157	-0.697412	down
MSTRG.88364.31	2.39e-12	-5.04802	down	CD101	0.00816606	-0.641903	down
MSTRG.64839.2	2.79e-12	-3.23418	down	Columba_livia_newGene_3167	3.4e-51	-3.61179	down
MSTRG.64839.2	2.79e-12	-3.23418	down	Columba_livia_newGene_90309	0.00178478	-0.747372	down
MSTRG.148169.2	3.03e-11	4.70273	up	Columba_livia_newGene_76279	0.00143518	0.692814	up
MSTRG.148169.2	3.03e-11	4.70273	up	TRMT10C	2.98e-07	1.12477	up
MSTRG.138219.2	2.82e-10	-4.12207	down	Columba_livia_newGene_3167	3.4e-51	-3.61179	down
MSTRG.156823.1	3.84e-08	3.34928	up	SMIM4	0.000649983	0.682864	up
MSTRG.138219.3	1.16e-07	-3.74727	down	CRTAP	0.00767454	-0.619813	down
MSTRG.93750.1	3.25e-07	2.31309	up	Columba_livia_newGene_47212	0.000331917	0.873532	up
MSTRG.93750.1	3.25e-07	2.31309	up	Columba_livia_newGene_90647	0.00498043	0.657144	up
MSTRG.93750.1	3.25e-07	2.31309	up	STEAP1	0.00522323	0.681122	up
MSTRG.82779.33	7.82e-06	3.24546	up	Columba_livia_newGene_76279	0.00143518	0.692814	up
MSTRG.82779.33	7.82e-06	3.24546	up	Columba_livia_newGene_8106	0.00474713	0.687223	up
MSTRG.82779.33	7.82e-06	3.24546	up	DUSP5	0.00376668	-0.620156	down
MSTRG.82779.33	7.82e-06	3.24546	up	TRMT10C	2.98e-07	1.12477	up
MSTRG.116821.1	2.12e-05	-1.42959	down	Columba_livia_newGene_3167	3.4e-51	-3.61179	down
MSTRG.136177.1	2.5e-05	2.16057	up	RGS10	1.41e-05	-1.05932	down
MSTRG.3338.5	7.79e-05	2.70667	up	ANKRD1	0.000236118	0.857743	up
MSTRG.3338.5	7.79e-05	2.70667	up	RRAD	0.00963461	0.590094	up
MSTRG.3338.5	7.79e-05	2.70667	up	SAMD9L	0.0103673	0.624069	up
MSTRG.3338.5	7.79e-05	2.70667	up	SOCS3	0.00914095	0.598229	up
MSTRG.105847.1	9.45e-05	-0.714521	down	Columba_livia_newGene_3167	3.4e-51	-3.61179	down
MSTRG.105846.1	9.64e-05	-0.972358	down	Columba_livia_newGene_71547	0.00335166	0.694075	up
MSTRG.111458.13	0.000101792	2.01829	up	DUSP5	0.00376668	-0.620156	down
MSTRG.113450.4	0.00015689	-2.34345	down	PCBD1	0.0142077	-0.587603	down
MSTRG.152143.1	0.000220406	1.80903	up	Columba_livia_newGene_35856	0.000205123	0.903057	up
MSTRG.34377.1	0.000250619	-2.07348	down	ACAT2	0.0039997	-0.647347	down
MSTRG.84552.20	0.00038407	2.51966	up	ANKRD1	0.000236118	0.857743	up
MSTRG.84552.20	0.00038407	2.51966	up	LOC106145774	0.0102273	0.593002	up
MSTRG.84552.20	0.00038407	2.51966	up	LOC110356420	0.00533366	0.659639	up
MSTRG.84552.20	0.00038407	2.51966	up	MATN3	0.00941136	0.63348	up
MSTRG.84552.20	0.00038407	2.51966	up	RRAD	0.00963461	0.590094	up
MSTRG.84552.20	0.00038407	2.51966	up	SAMD9L	0.0103673	0.624069	up
MSTRG.84552.20	0.00038407	2.51966	up	SOCS3	0.00914095	0.598229	up
MSTRG.63004.1	0.000428802	1.35529	up	Columba_livia_newGene_76279	0.00143518	0.692814	up
MSTRG.63004.1	0.000428802	1.35529	up	Columba_livia_newGene_8106	0.00474713	0.687223	up
MSTRG.63004.1	0.000428802	1.35529	up	DUSP5	0.00376668	-0.620156	down
MSTRG.64322.1	0.000486758	2.22846	up	Columba_livia_newGene_90647	0.00498043	0.657144	up
MSTRG.42699.9	0.000580608	2.35408	up	ANKRD1	0.000236118	0.857743	up
MSTRG.42699.9	0.000580608	2.35408	up	LOC106145774	0.0102273	0.593002	up
MSTRG.42699.9	0.000580608	2.35408	up	MATN3	0.00941136	0.63348	up
MSTRG.42699.9	0.000580608	2.35408	up	RRAD	0.00963461	0.590094	up
MSTRG.42699.9	0.000580608	2.35408	up	SAMD9L	0.0103673	0.624069	up
MSTRG.42699.9	0.000580608	2.35408	up	SOCS3	0.00914095	0.598229	up
MSTRG.44758.1	0.000581981	1.89096	up	ANKRD1	0.000236118	0.857743	up
MSTRG.44758.1	0.000581981	1.89096	up	ANKRD1	0.000236118	0.857743	up
MSTRG.44758.1	0.000581981	1.89096	up	GCNT7	0.00947561	0.592746	up
MSTRG.44758.1	0.000581981	1.89096	up	MATN3	0.00941136	0.63348	up
MSTRG.44758.1	0.000581981	1.89096	up	RRAD	0.00963461	0.590094	up
MSTRG.44758.1	0.000581981	1.89096	up	SAMD9L	0.0103673	0.624069	up
MSTRG.44758.1	0.000581981	1.89096	up	SOCS3	0.00914095	0.598229	up
MSTRG.52158.1	0.000617873	-2.39981	down	Columba_livia_newGene_3167	3.4e-51	-3.61179	down
MSTRG.52158.1	0.000617873	-2.39981	down	Columba_livia_newGene_90309	0.00178478	-0.747372	down
MSTRG.91503.8	0.000629794	2.09218	up	Columba_livia_newGene_34576	0.0101427	0.61383	up
MSTRG.91503.8	0.000629794	2.09218	up	Columba_livia_newGene_4033	0.0067852	0.640612	up
MSTRG.34555.20	0.000809947	2.13086	up	Columba_livia_newGene_35856	0.000205123	0.903057	up
MSTRG.139402.25	0.000819823	1.29398	up	Columba_livia_newGene_76279	0.00143518	0.692814	up
MSTRG.139402.25	0.000819823	1.29398	up	TRMT10C	2.98e-07	1.12477	up
MSTRG.22767.17	0.00084132	2.47675	up	HAO1	5.22e-05	0.965569	up
MSTRG.33097.1	0.000865187	1.47855	up	Columba_livia_newGene_76279	0.00143518	0.692814	up
MSTRG.114665.17	0.000958995	-1.93325	down	LOC102086561	0.0109091	0.621069	up
MSTRG.127024.2	0.00104986	1.54652	up	ANKRD1	0.000236118	0.857743	up
MSTRG.127024.2	0.00104986	1.54652	up	MATN3	0.00941136	0.63348	up
MSTRG.127024.2	0.00104986	1.54652	up	RRAD	0.00963461	0.590094	up
MSTRG.127024.2	0.00104986	1.54652	up	SAMD9L	0.0103673	0.624069	up
MSTRG.127024.2	0.00104986	1.54652	up	SOCS3	0.00914095	0.598229	up
MSTRG.126318.54	0.00106188	1.62069	up	LOC110356420	0.00533366	0.659639	up
MSTRG.146439.8	0.00129296	2.09052	up	Columba_livia_newGene_47212	0.000331917	0.873532	up
MSTRG.42991.6	0.00162307	-2.02336	down	CRTAP	0.00767454	-0.619813	down
MSTRG.42594.1	0.00163711	-1.44809	down	Columba_livia_newGene_8799	0.000144919	-0.870807	down
MSTRG.60345.1	0.00182256	1.78324	up	CUNH9orf78	0.00828777	0.605868	up
MSTRG.58102.1	0.00187319	1.1282	up	STEAP1	0.00522323	0.681122	up
MSTRG.118708.15	0.00194345	-2.17994	down	DNAJC19	1.41e-05	-0.724138	down
MSTRG.118708.15	0.00194345	-2.17994	down	YWHAG	7.93e-05	-0.961523	down
MSTRG.82779.16	0.00194457	2.31727	up	MATN3	0.00941136	0.63348	up
MSTRG.95666.15	0.00202575	2.25019	up	DUSP5	0.00376668	-0.620156	down
MSTRG.107487.23	0.00221616	-2.24892	down	DNAJC19	1.41e-05	-0.724138	down
MSTRG.107487.23	0.00221616	-2.24892	down	YWHAG	7.93e-05	-0.961523	down
MSTRG.139942.29	0.00234448	-1.83608	down	WDR20	0.00297157	-0.697412	down
MSTRG.16470.1	0.00247176	1.70686	up	SMIM4	0.000649983	0.682864	up
MSTRG.3352.4	0.00253444	1.88998	up	Columba_livia_newGene_47212	0.000331917	0.873532	up
MSTRG.34982.57	0.0028978	1.44733	up	GCNT7	0.00947561	0.592746	up
MSTRG.61769.1	0.00296632	-0.920459	down	PPP3R1	4.69e-05	-0.790722	down
MSTRG.135050.1	0.00305737	1.12654	up	Columba_livia_newGene_3167	3.4e-51	-3.61179	down
MSTRG.135050.1	0.00305737	1.12654	up	DDIT4	1.81e-05	0.694049	up
MSTRG.63046.27	0.00313818	1.30367	up	PPP3R1	4.69e-05	-0.790722	down
MSTRG.156437.9	0.00319912	-2.17395	down	PPP3R1	4.69e-05	-0.790722	down
MSTRG.151461.1	0.00320191	1.71295	up	UBC	0.00337073	0.614585	up
MSTRG.4890.1	0.00346859	1.07202	up	Columba_livia_newGene_7118	0.00595836	0.632172	up
MSTRG.4890.1	0.00346859	1.07202	up	LOC110356420	0.00533366	0.659639	up
MSTRG.127373.1	0.00405044	1.31221	up	Columba_livia_newGene_90140	1.48e-10	-1.48539	down
MSTRG.109913.5	0.0042099	-2.15861	down	CD101	0.00816606	-0.641903	down
MSTRG.146473.1	0.00480468	1.56394	up	Columba_livia_newGene_35856	0.000205123	0.903057	up
MSTRG.80268.1	0.0048971	1.71047	up	LOC110356420	0.00533366	0.659639	up
MSTRG.131250.2	0.00500016	-1.34206	down	ACAT2	0.0039997	-0.647347	down
MSTRG.18141.1	0.00506047	0.682455	up	Columba_livia_newGene_91007	0.00329767	0.710414	up
MSTRG.32309.1	0.00517453	1.04237	up	Columba_livia_newGene_76279	0.00143518	0.692814	up
MSTRG.32309.1	0.00517453	1.04237	up	Columba_livia_newGene_8106	0.00474713	0.687223	up
MSTRG.32309.1	0.00517453	1.04237	up	TRMT10C	2.98e-07	1.12477	up
MSTRG.82779.23	0.00540982	1.96016	up	FAM167A	0.0158574	-0.587106	down
MSTRG.9400.9	0.00565045	-1.47848	down	YWHAG	7.93e-05	-0.961523	down
MSTRG.149862.3	0.00627573	-1.95233	down	ACAT2	0.0039997	-0.647347	down
MSTRG.80736.1	0.00632052	-1.06837	down	PPP3R1	4.69e-05	-0.790722	down
MSTRG.132785.22	0.0063534	1.91649	up	ANKRD1	0.000236118	0.857743	up
MSTRG.132785.22	0.0063534	1.91649	up	LOC106145774	0.0102273	0.593002	up
MSTRG.132785.22	0.0063534	1.91649	up	LOC110356420	0.00533366	0.659639	up
MSTRG.132785.22	0.0063534	1.91649	up	MATN3	0.00941136	0.63348	up
MSTRG.132785.22	0.0063534	1.91649	up	RRAD	0.00963461	0.590094	up
MSTRG.132785.22	0.0063534	1.91649	up	SAMD9L	0.0103673	0.624069	up
MSTRG.132785.22	0.0063534	1.91649	up	SOCS3	0.00914095	0.598229	up
MSTRG.59448.27	0.00636227	1.71572	up	Columba_livia_newGene_776	0.00259855	0.649662	up
MSTRG.136018.25	0.00639087	-2.04432	down	STRN	0.00697504	-0.590004	down
MSTRG.71597.2	0.00645238	1.60297	up	GCNT7	0.00947561	0.592746	up
MSTRG.71597.2	0.00645238	1.60297	up	RSAD2	0.000502134	0.825209	up
MSTRG.130780.32	0.00666726	1.99588	up	ANKRD1	0.000236118	0.857743	up
MSTRG.130780.32	0.00666726	1.99588	up	LOC106145774	0.0102273	0.593002	up
MSTRG.130780.32	0.00666726	1.99588	up	MATN3	0.00941136	0.63348	up
MSTRG.130780.32	0.00666726	1.99588	up	RRAD	0.00963461	0.590094	up
MSTRG.130780.32	0.00666726	1.99588	up	SAMD9L	0.0103673	0.624069	up
MSTRG.130780.32	0.00666726	1.99588	up	SOCS3	0.00914095	0.598229	up
MSTRG.73855.1	0.0069349	-1.17693	down	WDR20	0.00297157	-0.697412	down
MSTRG.93386.4	0.00695651	0.670087	up	Columba_livia_newGene_7118	0.00595836	0.632172	up
MSTRG.51955.1	0.0070942	1.35694	up	ANKRD1	0.000236118	0.857743	up
MSTRG.51955.1	0.0070942	1.35694	up	GCNT7	0.00947561	0.592746	up
MSTRG.51955.1	0.0070942	1.35694	up	MATN3	0.00941136	0.63348	up
MSTRG.51955.1	0.0070942	1.35694	up	RRAD	0.00963461	0.590094	up
MSTRG.42038.28	0.00744952	1.78963	up	AMER3	0.00421013	0.590383	up
MSTRG.17539.17	0.0078809	-1.93888	down	ACAT2	0.0039997	-0.647347	down
MSTRG.113450.3	0.00796305	-2.0063	down	Columba_livia_newGene_8799	0.000144919	-0.870807	down
MSTRG.153395.5	0.00799147	-1.87079	down	CUNH10orf71	0.00229542	-0.738411	down
MSTRG.11096.2	0.00800404	1.7938	up	ANKRD1	0.000236118	0.857743	up
MSTRG.11096.2	0.00800404	1.7938	up	GCNT7	0.00947561	0.592746	up
MSTRG.11096.2	0.00800404	1.7938	up	MATN3	0.00941136	0.63348	up
MSTRG.11096.2	0.00800404	1.7938	up	RRAD	0.00963461	0.590094	up
MSTRG.11096.2	0.00800404	1.7938	up	SAMD9L	0.0103673	0.624069	up
MSTRG.11096.2	0.00800404	1.7938	up	SOCS3	0.00914095	0.598229	up
MSTRG.90461.1	0.00809283	1.31329	up	Columba_livia_newGene_88572	0.0108583	0.611399	up
MSTRG.73907.1	0.00826653	-1.42052	down	FAM167A	0.0158574	-0.587106	down
MSTRG.4508.1	0.00914486	1.89582	up	ANKRD1	0.000236118	0.857743	up
MSTRG.4508.1	0.00914486	1.89582	up	LOC106145774	0.0102273	0.593002	up
MSTRG.4508.1	0.00914486	1.89582	up	LOC110356420	0.00533366	0.659639	up
MSTRG.4508.1	0.00914486	1.89582	up	MATN3	0.00941136	0.63348	up
MSTRG.4508.1	0.00914486	1.89582	up	RRAD	0.00963461	0.590094	up
MSTRG.4508.1	0.00914486	1.89582	up	SAMD9L	0.0103673	0.624069	up
MSTRG.4508.1	0.00914486	1.89582	up	SOCS3	0.00914095	0.598229	up
MSTRG.44753.27	0.00924085	1.35905	up	ANKRD1	0.000236118	0.857743	up
MSTRG.44753.27	0.00924085	1.35905	up	MATN3	0.00941136	0.63348	up
MSTRG.44753.27	0.00924085	1.35905	up	RRAD	0.00963461	0.590094	up
MSTRG.44753.27	0.00924085	1.35905	up	SOCS3	0.00914095	0.598229	up
MSTRG.112209.32	0.0094214	-1.9237	down	DNAJC19	1.41e-05	-0.724138	down
MSTRG.112209.32	0.0094214	-1.9237	down	VASH1	0.00121899	-0.746016	down
MSTRG.67759.6	0.00960567	1.32099	up	Columba_livia_newGene_70329	0.0148278	0.590989	up
MSTRG.67759.6	0.00960567	1.32099	up	ANKRD1	0.000236118	0.857743	up
MSTRG.67759.6	0.00960567	1.32099	up	RRAD	0.00963461	0.590094	up
MSTRG.51782.1	0.00985185	-1.01674	down	PPP3R1	4.69e-05	-0.790722	down
MSTRG.139896.9	0.010009	1.19881	up	Columba_livia_newGene_35856	0.000205123	0.903057	up
MSTRG.143889.2	0.0100409	-1.6884	down	CRTAP	0.00767454	-0.619813	down
MSTRG.63458.1	0.010287	0.607298	up	Columba_livia_newGene_7118	0.00595836	0.632172	up
MSTRG.63458.1	0.010287	0.607298	up	LOC102090214	0.00578682	0.668521	up
MSTRG.115571.3	0.0104052	1.83093	up	DDIT4	1.81e-05	0.694049	up
MSTRG.17454.1	0.011043	-0.936771	down	CUNH10orf71	0.00229542	-0.738411	down
MSTRG.93756.4	0.0114951	-1.91164	down	ACAT2	0.0039997	-0.647347	down
MSTRG.109100.3	0.0118848	1.89001	up	AMER3	0.00421013	0.590383	up
MSTRG.64318.1	0.0119264	1.1657	up	LOC106145774	0.0102273	0.593002	up
MSTRG.64318.1	0.0119264	1.1657	up	LOC110356420	0.00533366	0.659639	up
MSTRG.64318.1	0.0119264	1.1657	up	RRAD	0.00963461	0.590094	up
MSTRG.64318.1	0.0119264	1.1657	up	SAMD9L	0.0103673	0.624069	up
MSTRG.64318.1	0.0119264	1.1657	up	SOCS3	0.00914095	0.598229	up
MSTRG.27240.1	0.0123144	1.21641	up	Columba_livia_newGene_35856	0.000205123	0.903057	up
MSTRG.151859.1	0.0125862	1.07334	up	USP18	5.15e-07	1.0195	up
MSTRG.143974.21	0.0129462	-1.63588	down	FAM167A	0.0158574	-0.587106	down
MSTRG.44711.23	0.0130179	-1.58332	down	LOC102084708	0.000821099	0.816216	up
MSTRG.36571.1	0.0132389	-1.05283	down	Columba_livia_newGene_1546	0.000861165	0.800883	up
MSTRG.67370.7	0.0132459	-1.87406	down	Columba_livia_newGene_90140	1.48e-10	-1.48539	down
MSTRG.112617.1	0.0136892	-1.23143	down	WDR20	0.00297157	-0.697412	down
MSTRG.43024.9	0.0138088	-1.86229	down	CRTAP	0.00767454	-0.619813	down
MSTRG.111942.1	0.0143235	1.00694	up	Columba_livia_newGene_35856	0.000205123	0.903057	up
MSTRG.51694.19	0.0147995	1.18962	up	LOC110356420	0.00533366	0.659639	up
MSTRG.30231.3	0.0149313	1.45341	up	RRAD	0.00963461	0.590094	up
MSTRG.30231.3	0.0149313	1.45341	up	SAMD9L	0.0103673	0.624069	up
MSTRG.30231.3	0.0149313	1.45341	up	SOCS3	0.00914095	0.598229	up
MSTRG.115732.1	0.0150331	0.879803	up	Columba_livia_newGene_90647	0.00498043	0.657144	up
MSTRG.6318.1	0.0152025	1.28581	up	Columba_livia_newGene_70329	0.0148278	0.590989	up
MSTRG.6318.1	0.0152025	1.28581	up	ANKRD1	0.000236118	0.857743	up
MSTRG.6318.1	0.0152025	1.28581	up	RRAD	0.00963461	0.590094	up
MSTRG.130943.53	0.0153036	1.21296	up	ANKRD1	0.000236118	0.857743	up
MSTRG.130943.53	0.0153036	1.21296	up	MATN3	0.00941136	0.63348	up
MSTRG.130943.53	0.0153036	1.21296	up	TRMT10C	2.98e-07	1.12477	up
MSTRG.12422.1	0.0155891	1.39138	up	Columba_livia_newGene_90647	0.00498043	0.657144	up
MSTRG.12422.1	0.0155891	1.39138	up	STEAP1	0.00522323	0.681122	up
MSTRG.144579.56	0.0156511	-1.82324	down	ACAT2	0.0039997	-0.647347	down
MSTRG.51365.1	0.01606	1.68293	up	Columba_livia_newGene_76246	0.00367993	0.690636	up
MSTRG.51365.1	0.01606	1.68293	up	Columba_livia_newGene_88572	0.0108583	0.611399	up
MSTRG.104045.1	0.0161207	1.48637	up	Columba_livia_newGene_8106	0.00474713	0.687223	up
MSTRG.52748.23	0.0163416	0.794249	up	TMED5	6.04e-06	1.10308	up
MSTRG.115520.46	0.017573	-1.78829	down	CRTAP	0.00767454	-0.619813	down
MSTRG.115520.46	0.017573	-1.78829	down	DHX37	0.00372501	-0.686761	down
MSTRG.113034.1	0.0177599	0.915666	up	Columba_livia_newGene_7118	0.00595836	0.632172	up
MSTRG.27944.4	0.0177833	1.27626	up	LOC110356420	0.00533366	0.659639	up
MSTRG.27944.4	0.0177833	1.27626	up	SAMD9L	0.0103673	0.624069	up
MSTRG.75004.21	0.0180098	-1.74885	down	CD101	0.00816606	-0.641903	down
MSTRG.74009.2	0.0181671	-1.19858	down	PCBD1	0.0142077	-0.587603	down
MSTRG.62078.1	0.0183107	1.53447	up	Columba_livia_newGene_70329	0.0148278	0.590989	up
MSTRG.62078.1	0.0183107	1.53447	up	ANKRD1	0.000236118	0.857743	up
MSTRG.62078.1	0.0183107	1.53447	up	UBC	0.00337073	0.614585	up
MSTRG.50478.1	0.019166	0.95599	up	GCNT7	0.00947561	0.592746	up
MSTRG.50478.1	0.019166	0.95599	up	RSAD2	0.000502134	0.825209	up
MSTRG.50478.1	0.019166	0.95599	up	SAMD9L	0.0103673	0.624069	up
MSTRG.97551.1	0.0194366	-1.10807	down	FAAH	0.00012019	-0.60292	down
MSTRG.24262.23	0.0196981	1.73293	up	HAO1	5.22e-05	0.965569	up
MSTRG.160732.60	0.0199662	-1.24098	down	DNAJC19	1.41e-05	-0.724138	down
MSTRG.32691.2	0.0200197	-1.37342	down	ACAT2	0.0039997	-0.647347	down
MSTRG.27973.1	0.0204059	-1.1483	down	FAAH	0.00012019	-0.60292	down
MSTRG.130978.1	0.0211351	1.20527	up	GCNT7	0.00947561	0.592746	up
MSTRG.130978.1	0.0211351	1.20527	up	LOC102090214	0.00578682	0.668521	up
MSTRG.153815.1	0.0212031	0.617496	up	LOC102098806	1.85e-05	-1.04057	down
MSTRG.115682.4	0.0214819	1.72869	up	Columba_livia_newGene_47212	0.000331917	0.873532	up
MSTRG.156089.11	0.0234664	-1.67933	down	PPP3R1	4.69e-05	-0.790722	down
MSTRG.27764.2	0.0238326	1.59507	up	ANKRD1	0.000236118	0.857743	up
MSTRG.27764.2	0.0238326	1.59507	up	MATN3	0.00941136	0.63348	up
MSTRG.27764.2	0.0238326	1.59507	up	RRAD	0.00963461	0.590094	up
MSTRG.27764.2	0.0238326	1.59507	up	SOCS3	0.00914095	0.598229	up
MSTRG.130982.34	0.0244074	1.06972	up	ANKRD1	0.000236118	0.857743	up
MSTRG.130997.1	0.0246283	0.727263	up	CUNH9orf78	0.00828777	0.605868	up
MSTRG.60323.1	0.0247658	1.47209	up	ANKRD1	0.000236118	0.857743	up
MSTRG.60323.1	0.0247658	1.47209	up	MATN3	0.00941136	0.63348	up
MSTRG.60323.1	0.0247658	1.47209	up	RRAD	0.00963461	0.590094	up
MSTRG.60323.1	0.0247658	1.47209	up	SAMD9L	0.0103673	0.624069	up
MSTRG.60323.1	0.0247658	1.47209	up	SOCS3	0.00914095	0.598229	up
MSTRG.57715.3	0.0247871	-1.68873	down	ACAT2	0.0039997	-0.647347	down
MSTRG.89107.1	0.0248833	-1.554	down	Columba_livia_newGene_8799	0.000144919	-0.870807	down
MSTRG.30231.1	0.025088	1.6877	up	ANKRD1	0.000236118	0.857743	up
MSTRG.30231.1	0.025088	1.6877	up	LOC106145774	0.0102273	0.593002	up
MSTRG.30231.1	0.025088	1.6877	up	MATN3	0.00941136	0.63348	up
MSTRG.30231.1	0.025088	1.6877	up	RRAD	0.00963461	0.590094	up
MSTRG.30231.1	0.025088	1.6877	up	SAMD9L	0.0103673	0.624069	up
MSTRG.30231.1	0.025088	1.6877	up	SOCS3	0.00914095	0.598229	up
MSTRG.100767.2	0.02602	1.67254	up	Columba_livia_newGene_72814	0.00437053	0.694478	up
MSTRG.117305.16	0.0264	1.38402	up	STEAP1	0.00522323	0.681122	up
MSTRG.102980.3	0.0264801	1.62324	up	Columba_livia_newGene_35856	0.000205123	0.903057	up
MSTRG.58375.4	0.0277319	-1.37804	down	DNAJC19	1.41e-05	-0.724138	down
MSTRG.143792.7	0.0278628	1.66046	up	ANKRD1	0.000236118	0.857743	up
MSTRG.143792.7	0.0278628	1.66046	up	MATN3	0.00941136	0.63348	up
MSTRG.143792.7	0.0278628	1.66046	up	TRMT10C	2.98e-07	1.12477	up
MSTRG.26582.63	0.0279834	1.63768	up	ANKRD1	0.000236118	0.857743	up
MSTRG.26582.63	0.0279834	1.63768	up	GCNT7	0.00947561	0.592746	up
MSTRG.26582.63	0.0279834	1.63768	up	RRAD	0.00963461	0.590094	up
MSTRG.26582.63	0.0279834	1.63768	up	SAMD9L	0.0103673	0.624069	up
MSTRG.26582.63	0.0279834	1.63768	up	SOCS3	0.00914095	0.598229	up
MSTRG.110705.1	0.0283039	0.910839	up	Columba_livia_newGene_15973	0.00785988	0.621702	up
MSTRG.134822.1	0.0283152	1.09047	up	DUSP5	0.00376668	-0.620156	down
MSTRG.125629.1	0.028626	1.61899	up	ANKRD1	0.000236118	0.857743	up
MSTRG.125629.1	0.028626	1.61899	up	LOC106145774	0.0102273	0.593002	up
MSTRG.125629.1	0.028626	1.61899	up	MATN3	0.00941136	0.63348	up
MSTRG.125629.1	0.028626	1.61899	up	RRAD	0.00963461	0.590094	up
MSTRG.125629.1	0.028626	1.61899	up	SOCS3	0.00914095	0.598229	up
MSTRG.2462.2	0.0292219	1.51078	up	SOCS3	0.00914095	0.598229	up
MSTRG.4901.1	0.0297587	1.36615	up	LOC106145774	0.0102273	0.593002	up
MSTRG.4901.1	0.0297587	1.36615	up	LOC110356420	0.00533366	0.659639	up
MSTRG.4901.1	0.0297587	1.36615	up	SAMD9L	0.0103673	0.624069	up
MSTRG.4901.1	0.0297587	1.36615	up	SOCS3	0.00914095	0.598229	up
MSTRG.152670.1	0.0298702	-1.10452	down	CGGBP1	0.00306843	0.709788	up
MSTRG.101378.25	0.0302227	1.62934	up	ANKRD1	0.000236118	0.857743	up
MSTRG.101378.25	0.0302227	1.62934	up	LOC106145774	0.0102273	0.593002	up
MSTRG.101378.25	0.0302227	1.62934	up	LOC110356420	0.00533366	0.659639	up
MSTRG.101378.25	0.0302227	1.62934	up	RRAD	0.00963461	0.590094	up
MSTRG.101378.25	0.0302227	1.62934	up	SOCS3	0.00914095	0.598229	up
MSTRG.113047.1	0.0311688	1.26524	up	Columba_livia_newGene_70329	0.0148278	0.590989	up
MSTRG.113047.1	0.0311688	1.26524	up	Columba_livia_newGene_7118	0.00595836	0.632172	up
MSTRG.113047.1	0.0311688	1.26524	up	ANKRD1	0.000236118	0.857743	up
MSTRG.113047.1	0.0311688	1.26524	up	GCNT7	0.00947561	0.592746	up
MSTRG.113047.1	0.0311688	1.26524	up	SOCS3	0.00914095	0.598229	up
MSTRG.101559.1	0.0314245	0.838826	up	Columba_livia_newGene_35856	0.000205123	0.903057	up
MSTRG.53568.2	0.0315228	1.32908	up	ANKRD1	0.000236118	0.857743	up
MSTRG.53568.2	0.0315228	1.32908	up	LOC106145774	0.0102273	0.593002	up
MSTRG.53568.2	0.0315228	1.32908	up	MATN3	0.00941136	0.63348	up
MSTRG.53568.2	0.0315228	1.32908	up	RRAD	0.00963461	0.590094	up
MSTRG.53568.2	0.0315228	1.32908	up	SAMD9L	0.0103673	0.624069	up
MSTRG.53568.2	0.0315228	1.32908	up	SOCS3	0.00914095	0.598229	up
MSTRG.116703.1	0.0323552	1.10903	up	USP18	5.15e-07	1.0195	up
MSTRG.40710.1	0.032762	-0.900293	down	DUSP5	0.00376668	-0.620156	down
MSTRG.142810.1	0.0328002	1.60927	up	Columba_livia_newGene_70329	0.0148278	0.590989	up
MSTRG.142810.1	0.0328002	1.60927	up	ANKRD1	0.000236118	0.857743	up
MSTRG.142810.1	0.0328002	1.60927	up	LOC106145774	0.0102273	0.593002	up
MSTRG.142810.1	0.0328002	1.60927	up	MATN3	0.00941136	0.63348	up
MSTRG.142810.1	0.0328002	1.60927	up	RRAD	0.00963461	0.590094	up
MSTRG.142810.1	0.0328002	1.60927	up	SOCS3	0.00914095	0.598229	up
MSTRG.143873.17	0.0328675	-1.50156	down	CD101	0.00816606	-0.641903	down
MSTRG.12077.2	0.0337802	1.52848	up	ANKRD1	0.000236118	0.857743	up
MSTRG.12077.2	0.0337802	1.52848	up	LOC106145774	0.0102273	0.593002	up
MSTRG.12077.2	0.0337802	1.52848	up	LOC110356420	0.00533366	0.659639	up
MSTRG.12077.2	0.0337802	1.52848	up	RRAD	0.00963461	0.590094	up
MSTRG.12077.2	0.0337802	1.52848	up	SAMD9L	0.0103673	0.624069	up
MSTRG.12077.2	0.0337802	1.52848	up	SOCS3	0.00914095	0.598229	up
MSTRG.88894.4	0.0339173	-1.30907	down	Columba_livia_newGene_15903	4.08e-05	-0.876252	down
MSTRG.7491.1	0.034148	-0.864164	down	FAM167A	0.0158574	-0.587106	down
MSTRG.24502.37	0.0342244	1.60108	up	Columba_livia_newGene_25935	0.00687902	0.631225	up
MSTRG.24502.37	0.0342244	1.60108	up	Columba_livia_newGene_68442	0.000386688	0.865241	up
MSTRG.43516.32	0.0343033	1.59553	up	RGS10	1.41e-05	-1.05932	down
MSTRG.117449.1	0.0351218	1.5698	up	Columba_livia_newGene_47212	0.000331917	0.873532	up
MSTRG.15939.1	0.0352955	-1.23454	down	WDR20	0.00297157	-0.697412	down
MSTRG.120328.1	0.0354396	-1.1057	down	DNAJC19	1.41e-05	-0.724138	down
MSTRG.120328.1	0.0354396	-1.1057	down	VASH1	0.00121899	-0.746016	down
MSTRG.140096.1	0.0356281	0.97947	up	DDIT4	1.81e-05	0.694049	up
MSTRG.134438.1	0.0366178	1.16623	up	ANKRD1	0.000236118	0.857743	up
MSTRG.134438.1	0.0366178	1.16623	up	LOC106145774	0.0102273	0.593002	up
MSTRG.134438.1	0.0366178	1.16623	up	LOC110356420	0.00533366	0.659639	up
MSTRG.134438.1	0.0366178	1.16623	up	MATN3	0.00941136	0.63348	up
MSTRG.134438.1	0.0366178	1.16623	up	RRAD	0.00963461	0.590094	up
MSTRG.134438.1	0.0366178	1.16623	up	SAMD9L	0.0103673	0.624069	up
MSTRG.134438.1	0.0366178	1.16623	up	SOCS3	0.00914095	0.598229	up
MSTRG.64314.1	0.0367208	1.035	up	LOC110356420	0.00533366	0.659639	up
MSTRG.64314.1	0.0367208	1.035	up	SOCS3	0.00914095	0.598229	up
MSTRG.26582.64	0.037023	-1.53729	down	CD101	0.00816606	-0.641903	down
MSTRG.93377.11	0.0375568	-1.44693	down	DNAJC19	1.41e-05	-0.724138	down
MSTRG.93377.11	0.0375568	-1.44693	down	VASH1	0.00121899	-0.746016	down
MSTRG.154639.1	0.0381574	1.21358	up	STEAP1	0.00522323	0.681122	up
MSTRG.44843.1	0.0383151	-1.55916	down	DNAJC19	1.41e-05	-0.724138	down
MSTRG.44843.1	0.0383151	-1.55916	down	VASH1	0.00121899	-0.746016	down
MSTRG.77262.1	0.03881	1.35481	up	Columba_livia_newGene_90647	0.00498043	0.657144	up
MSTRG.53869.1	0.0396923	1.44403	up	ANKRD1	0.000236118	0.857743	up
MSTRG.67122.7	0.0398476	-1.22737	down	VASH1	0.00121899	-0.746016	down
MSTRG.32493.1	0.0399629	0.691103	up	SAMD9L	0.0103673	0.624069	up
MSTRG.90953.1	0.0402621	1.23149	up	ANKRD1	0.000236118	0.857743	up
MSTRG.90953.1	0.0402621	1.23149	up	MATN3	0.00941136	0.63348	up
MSTRG.90953.1	0.0402621	1.23149	up	RRAD	0.00963461	0.590094	up
MSTRG.90953.1	0.0402621	1.23149	up	SOCS3	0.00914095	0.598229	up
MSTRG.4513.1	0.0402665	1.53264	up	ANKRD1	0.000236118	0.857743	up
MSTRG.4513.1	0.0402665	1.53264	up	LOC106145774	0.0102273	0.593002	up
MSTRG.4513.1	0.0402665	1.53264	up	MATN3	0.00941136	0.63348	up
MSTRG.4513.1	0.0402665	1.53264	up	RRAD	0.00963461	0.590094	up
MSTRG.4513.1	0.0402665	1.53264	up	SAMD9L	0.0103673	0.624069	up
MSTRG.4513.1	0.0402665	1.53264	up	SOCS3	0.00914095	0.598229	up
MSTRG.39932.1	0.0406773	0.96199	up	Columba_livia_newGene_7118	0.00595836	0.632172	up
MSTRG.39932.1	0.0406773	0.96199	up	LOC110356420	0.00533366	0.659639	up
MSTRG.39932.1	0.0406773	0.96199	up	RRAD	0.00963461	0.590094	up
MSTRG.39932.1	0.0406773	0.96199	up	SAMD9L	0.0103673	0.624069	up
MSTRG.39932.1	0.0406773	0.96199	up	SOCS3	0.00914095	0.598229	up
MSTRG.135074.12	0.0408118	-1.54736	down	DNAJC19	1.41e-05	-0.724138	down
MSTRG.45762.9	0.0412786	1.02372	up	ANKRD1	0.000236118	0.857743	up
MSTRG.45762.9	0.0412786	1.02372	up	LOC106145774	0.0102273	0.593002	up
MSTRG.45762.9	0.0412786	1.02372	up	MATN3	0.00941136	0.63348	up
MSTRG.45762.9	0.0412786	1.02372	up	RRAD	0.00963461	0.590094	up
MSTRG.45762.9	0.0412786	1.02372	up	SOCS3	0.00914095	0.598229	up
MSTRG.113754.1	0.0418202	1.45545	up	ANKRD1	0.000236118	0.857743	up
MSTRG.113754.1	0.0418202	1.45545	up	TRMT10C	2.98e-07	1.12477	up
MSTRG.131732.1	0.041822	0.863341	up	Columba_livia_newGene_90647	0.00498043	0.657144	up
MSTRG.93947.1	0.0424004	1.31448	up	ANKRD1	0.000236118	0.857743	up
MSTRG.93947.1	0.0424004	1.31448	up	LOC106145774	0.0102273	0.593002	up
MSTRG.93947.1	0.0424004	1.31448	up	MATN3	0.00941136	0.63348	up
MSTRG.93947.1	0.0424004	1.31448	up	RRAD	0.00963461	0.590094	up
MSTRG.93947.1	0.0424004	1.31448	up	SAMD9L	0.0103673	0.624069	up
MSTRG.93947.1	0.0424004	1.31448	up	SOCS3	0.00914095	0.598229	up
MSTRG.93947.1	0.0424004	1.31448	up	TRMT10C	2.98e-07	1.12477	up
MSTRG.149338.4	0.0424521	1.31927	up	ANKRD1	0.000236118	0.857743	up
MSTRG.149338.4	0.0424521	1.31927	up	LOC106145774	0.0102273	0.593002	up
MSTRG.149338.4	0.0424521	1.31927	up	MATN3	0.00941136	0.63348	up
MSTRG.149338.4	0.0424521	1.31927	up	RRAD	0.00963461	0.590094	up
MSTRG.149338.4	0.0424521	1.31927	up	SOCS3	0.00914095	0.598229	up
MSTRG.149338.4	0.0424521	1.31927	up	TRMT10C	2.98e-07	1.12477	up
MSTRG.99830.1	0.0426444	0.951614	up	CUNH9orf78	0.00828777	0.605868	up
MSTRG.61636.1	0.0434962	1.00007	up	Columba_livia_newGene_23141	0.00013559	0.865779	up
MSTRG.141103.1	0.0438691	-1.03392	down	YWHAG	7.93e-05	-0.961523	down
MSTRG.86945.2	0.0462311	1.30984	up	Columba_livia_newGene_34576	0.0101427	0.61383	up
MSTRG.109646.1	0.046507	-1.0624	down	LOC102098485	0.00240632	0.68293	up
MSTRG.109646.1	0.046507	-1.0624	down	LOC110355096	0.0136565	0.586951	up
MSTRG.149638.1	0.0470346	1.30698	up	ANKRD1	0.000236118	0.857743	up
MSTRG.149638.1	0.0470346	1.30698	up	LOC106145774	0.0102273	0.593002	up
MSTRG.149638.1	0.0470346	1.30698	up	MATN3	0.00941136	0.63348	up
MSTRG.149638.1	0.0470346	1.30698	up	RRAD	0.00963461	0.590094	up
MSTRG.149638.1	0.0470346	1.30698	up	SOCS3	0.00914095	0.598229	up
MSTRG.39862.1	0.0472078	0.716108	up	ANKRD1	0.000236118	0.857743	up
MSTRG.39862.1	0.0472078	0.716108	up	LOC106145774	0.0102273	0.593002	up
MSTRG.39862.1	0.0472078	0.716108	up	MATN3	0.00941136	0.63348	up
MSTRG.39862.1	0.0472078	0.716108	up	RRAD	0.00963461	0.590094	up
MSTRG.39862.1	0.0472078	0.716108	up	SOCS3	0.00914095	0.598229	up
MSTRG.39862.1	0.0472078	0.716108	up	TRMT10C	2.98e-07	1.12477	up
MSTRG.156449.3	0.0476467	1.49815	up	Columba_livia_newGene_4033	0.0067852	0.640612	up
MSTRG.108679.1	0.0493589	0.737776	up	LOC102090214	0.00578682	0.668521	up
