# Supplementary material for: Transcriptome Analysis Revealed Potential Mechanisms of Resistance to Trichomoniasis gallinae Infection in Pigeon (Columba livia)
Source: Front Vet Sci. 2021 Sep 14;8:672270. doi: 10.3389/fvets.2021.672270 (PMC8477972; doi:10.3389/fvets.2021.672270)
Supplement: Supplementary Table 5 — Co-expressed pairs of differentially expressed (DE) lncRNA and DE genes within control vs. susceptible birds (a), control vs. tolerant birds (b), and susceptible vs. tolerant birds (c). [file Table_5.XLSX]

## Sheet: Supplementary Table S3a
Table S3a The protein-coding genes within 100 k upstream and downstream of DE-lncRNA in N vs. S birds
LncRNA	LncRNA Location	Gene	Gene Location
MSTRG.156546.12	NW_004976531.1 : 76581 - 89377	SLC16A3	NW_004976531.1:70909-74969
MSTRG.156546.12	NW_004976531.1 : 76581 - 89377	FASN	NW_004976531.1:530-32880
MSTRG.156546.12	NW_004976531.1 : 76581 - 89377	LOC102086377	NW_004976531.1:40727-61542
MSTRG.156505.1	NW_004976490.1 : 1514 - 2612	LOC102085602	NW_004976490.1:7566-8376
MSTRG.156505.1	NW_004976490.1 : 1514 - 2612	LOC102085723	NW_004976490.1:4185-7665
MSTRG.156505.1	NW_004976490.1 : 1514 - 2612	LOC106146079	NW_004976490.1:15242-17664
MSTRG.156505.1	NW_004976133.1 : 6212 - 6998	LOC102097911	NW_004976133.1:10063-16342
MSTRG.155665.3	NW_004975452.1 : 8175 - 8782	CCDC61	NW_004975452.1:2275-6981
MSTRG.155197.2	NW_004975072.1 : 205916 - 250639	CTTNBP2NL	NW_004975072.1:258692-276992
MSTRG.155197.2	NW_004975072.1 : 205916 - 250639	FAM72A	NW_004975072.1:136728-141238
MSTRG.155197.2	NW_004975072.1 : 205916 - 250639	AVPR1B	NW_004975072.1:111859-117547
MSTRG.155197.2	NW_004975072.1 : 205916 - 250639	CUNH1orf186	NW_004975072.1:110780-111725
MSTRG.155130.1	NW_004975040.1 : 12942 - 13320	MARS	NW_004975040.1:48-4604
MSTRG.155130.1	NW_004975040.1 : 12942 - 13320	LOC110356599	NW_004975040.1:11366-12908
MSTRG.154980.1	NW_004974926.1 : 12033 - 12887	LOC102083653	NW_004974926.1:19807-22336
MSTRG.154218.1	NW_004974753.1 : 43212 - 46851	LOC102098270	NW_004974753.1:97555-98746
MSTRG.154232.1	NW_004974753.1 : 106602 - 135022	LOC102098270	NW_004974753.1:97555-98746
MSTRG.154218.1	NW_004974753.1 : 43212 - 46851	LOC102098090	NW_004974753.1:57298-88425
MSTRG.154232.1	NW_004974753.1 : 106602 - 135022	LOC102098090	NW_004974753.1:57298-88425
MSTRG.154232.1	NW_004974753.1 : 106602 - 135022	WDR73	NW_004974753.1:41969-54878
MSTRG.154218.1	NW_004974753.1 : 43212 - 46851	LOC102097732	NW_004974753.1:23565-31943
MSTRG.154232.1	NW_004974753.1 : 106602 - 135022	LOC102097732	NW_004974753.1:23565-31943
MSTRG.153699.2	NW_004974613.1 : 229415 - 230200	SLC48A1	NW_004974613.1:251192-255961
MSTRG.153503.2	NW_004974580.1 : 103178 - 104990	DBNL	NW_004974580.1:74390-84649
MSTRG.153503.2	NW_004974580.1 : 103178 - 104990	CAPG	NW_004974580.1:64761-72736
MSTRG.153503.2	NW_004974580.1 : 103178 - 104990	AEBP1	NW_004974580.1:50060-63962
MSTRG.153503.2	NW_004974580.1 : 103178 - 104990	POLD2	NW_004974580.1:45702-50167
MSTRG.153503.2	NW_004974580.1 : 103178 - 104990	GCK	NW_004974580.1:30150-33969
MSTRG.153503.2	NW_004974580.1 : 103178 - 104990	YKT6	NW_004974580.1:18141-24387
MSTRG.153503.2	NW_004974580.1 : 103178 - 104990	TCF7L1	NW_004974580.1:108098-114617
MSTRG.153424.14	NW_004974554.1 : 4599 - 6824	BCKDK	NW_004974554.1:5-1593
MSTRG.153424.18	NW_004974554.1 : 4599 - 6309	BCKDK	NW_004974554.1:5-1593
MSTRG.153424.20	NW_004974554.1 : 4599 - 6438	BCKDK	NW_004974554.1:5-1593
MSTRG.153141.1	NW_004974518.1 : 93707 - 105407	LOC102087376	NW_004974518.1:9724-10490
MSTRG.153141.1	NW_004974518.1 : 93707 - 105407	SARNP	NW_004974518.1:77619-92598
MSTRG.153141.1	NW_004974518.1 : 93707 - 105407	GDF11	NW_004974518.1:70204-74956
MSTRG.153141.1	NW_004974518.1 : 93707 - 105407	INPP1	NW_004974518.1:64070-65946
MSTRG.153141.1	NW_004974518.1 : 93707 - 105407	CD63	NW_004974518.1:61157-64377
MSTRG.153141.1	NW_004974518.1 : 93707 - 105407	RDH5	NW_004974518.1:59687-60808
MSTRG.153141.1	NW_004974518.1 : 93707 - 105407	ITGA7	NW_004974518.1:34893-52397
MSTRG.153141.1	NW_004974518.1 : 93707 - 105407	LOC102087914	NW_004974518.1:25679-33813
MSTRG.153141.1	NW_004974518.1 : 93707 - 105407	C1QL4	NW_004974518.1:11094-12495
MSTRG.153092.1	NW_004974512.1 : 8606 - 9587	MPP6	NW_004974512.1:16579-48226
MSTRG.153086.2	NW_004974511.1 : 595145 - 595989	LOC102086698	NW_004974511.1:568716-572764
MSTRG.153086.2	NW_004974511.1 : 595145 - 595989	LOC102086143	NW_004974511.1:549016-555411
MSTRG.153048.89	NW_004974511.1 : 441422 - 443563	ARRDC1	NW_004974511.1:501165-528453
MSTRG.153086.2	NW_004974511.1 : 595145 - 595989	ARRDC1	NW_004974511.1:501165-528453
MSTRG.152502.4	NW_004974491.1 : 4964298 - 4981228	UBE2D3	NW_004974491.1:5032529-5040765
MSTRG.152502.4	NW_004974491.1 : 4964298 - 4981228	CISD2	NW_004974491.1:4996891-5005441
MSTRG.152502.4	NW_004974491.1 : 4964298 - 4981228	LOC102085539	NW_004974491.1:4924856-4932326
MSTRG.152224.1	NW_004974491.1 : 3275142 - 3283148	RPL34	NW_004974491.1:3297871-3301431
MSTRG.152224.1	NW_004974491.1 : 3275142 - 3283148	OSTC	NW_004974491.1:3290372-3294477
MSTRG.152224.1	NW_004974491.1 : 3275142 - 3283148	ETNPPL	NW_004974491.1:3245479-3260140
MSTRG.152224.1	NW_004974491.1 : 3275142 - 3283148	LOC110356341	NW_004974491.1:3212656-3241150
MSTRG.151374.15	NW_004974440.1 : 367236 - 369633	SEC23IP	NW_004974440.1:417604-438389
MSTRG.151374.15	NW_004974440.1 : 367236 - 369633	MCMBP	NW_004974440.1:396327-417725
MSTRG.151374.15	NW_004974440.1 : 367236 - 369633	INPP5F	NW_004974440.1:384766-393900
MSTRG.151374.15	NW_004974440.1 : 367236 - 369633	BAG3	NW_004974440.1:318196-327747
MSTRG.151374.15	NW_004974440.1 : 367236 - 369633	TIAL1	NW_004974440.1:273405-292949
MSTRG.151038.1	NW_004974407.1 : 71145 - 71535	LOC102098866	NW_004974407.1:2884-15880
MSTRG.150967.22	NW_004974391.1 : 227212 - 231056	LOC110356224	NW_004974391.1:251172-252868
MSTRG.150967.22	NW_004974391.1 : 227212 - 231056	TMEM140	NW_004974391.1:241046-244316
MSTRG.150967.22	NW_004974391.1 : 227212 - 231056	PDE6H	NW_004974391.1:177982-184485
MSTRG.150967.22	NW_004974391.1 : 227212 - 231056	ARHGDIB	NW_004974391.1:157709-166580
MSTRG.150967.22	NW_004974391.1 : 227212 - 231056	ERP27	NW_004974391.1:139006-157125
MSTRG.150645.41	NW_004974361.1 : 26253 - 40586	FRS2	NW_004974361.1:91318-132866
MSTRG.150645.41	NW_004974361.1 : 26253 - 40586	YEATS4	NW_004974361.1:43344-56726
MSTRG.150421.2	NW_004974321.1 : 18685 - 25055	LOC110356167	NW_004974321.1:67037-68695
MSTRG.149308.4	NW_004974228.1 : 237172 - 238403	LOC102086631	NW_004974228.1:239486-243408
MSTRG.149308.4	NW_004974228.1 : 237172 - 238403	M1AP	NW_004974228.1:205067-227120
MSTRG.149308.4	NW_004974228.1 : 237172 - 238403	DOK1	NW_004974228.1:197882-201870
MSTRG.149308.4	NW_004974228.1 : 237172 - 238403	LOC102086261	NW_004974228.1:166363-185096
MSTRG.149308.4	NW_004974228.1 : 237172 - 238403	LOXL3	NW_004974228.1:147862-158792
MSTRG.149308.4	NW_004974228.1 : 237172 - 238403	HTRA2	NW_004974228.1:141267-145551
MSTRG.148961.2	NW_004974199.1 : 1 - 3481	LOC110356052	NW_004974199.1:7654-16936
MSTRG.148883.1	NW_004974183.1 : 96396 - 98086	LOC110356036	NW_004974183.1:13236-91127
MSTRG.148853.1	NW_004974182.1 : 94690 - 102125	LOC102084999	NW_004974182.1:102142-146145
MSTRG.148153.1	NW_004974150.1 : 114715 - 117259	LOC102090441	NW_004974150.1:60531-79696
MSTRG.148153.1	NW_004974150.1 : 114715 - 117259	LOC102089341	NW_004974150.1:185917-191413
MSTRG.148153.1	NW_004974150.1 : 114715 - 117259	SH3BGRL	NW_004974150.1:173889-183208
MSTRG.146473.1	NW_004974099.1 : 4309 - 11252	CCNE1	NW_004974099.1:51131-63120
MSTRG.146468.1	NW_004974098.1 : 180810 - 181444	GPT	NW_004974098.1:160506-174706
MSTRG.146468.1	NW_004974098.1 : 180810 - 181444	RECQL4	NW_004974098.1:138262-153624
MSTRG.146468.1	NW_004974098.1 : 180810 - 181444	LRRC14	NW_004974098.1:133923-135869
MSTRG.146468.1	NW_004974098.1 : 180810 - 181444	CUNH8orf82	NW_004974098.1:123880-133623
MSTRG.146468.1	NW_004974098.1 : 180810 - 181444	LOC110355864	NW_004974098.1:121670-122992
MSTRG.145704.1	NW_004974095.1 : 40056 - 41600	LOC110355816	NW_004974095.1:91399-106714
MSTRG.145704.1	NW_004974095.1 : 40056 - 41600	PRDM2	NW_004974095.1:60474-89550
MSTRG.146389.19	NW_004974095.1 : 4445792 - 4446987	SLC45A1	NW_004974095.1:4498882-4533585
MSTRG.146389.19	NW_004974095.1 : 4445792 - 4446987	ERRFI1	NW_004974095.1:4476830-4485932
MSTRG.146389.19	NW_004974095.1 : 4445792 - 4446987	PARK7	NW_004974095.1:4463042-4468077
MSTRG.146389.19	NW_004974095.1 : 4445792 - 4446987	TNFRSF9	NW_004974095.1:4457815-4463088
MSTRG.146389.19	NW_004974095.1 : 4445792 - 4446987	PER3	NW_004974095.1:4426120-4444800
MSTRG.146389.19	NW_004974095.1 : 4445792 - 4446987	VAMP3	NW_004974095.1:4419424-4424144
MSTRG.146373.1	NW_004974095.1 : 4286239 - 4286690	DNAJC11	NW_004974095.1:4255148-4264635
MSTRG.146373.1	NW_004974095.1 : 4286239 - 4286690	PHF13	NW_004974095.1:4250366-4253896
MSTRG.146373.1	NW_004974095.1 : 4286239 - 4286690	KLHL21	NW_004974095.1:4243133-4247386
MSTRG.146373.1	NW_004974095.1 : 4286239 - 4286690	ZBTB48	NW_004974095.1:4237612-4241320
MSTRG.146373.1	NW_004974095.1 : 4286239 - 4286690	TAS1R1	NW_004974095.1:4231095-4235986
MSTRG.146373.1	NW_004974095.1 : 4286239 - 4286690	NOL9	NW_004974095.1:4226633-4231071
MSTRG.146373.1	NW_004974095.1 : 4286239 - 4286690	PLEKHG5	NW_004974095.1:4214682-4224164
MSTRG.146373.1	NW_004974095.1 : 4286239 - 4286690	TNFRSF25	NW_004974095.1:4210135-4214824
MSTRG.146373.1	NW_004974095.1 : 4286239 - 4286690	ESPN	NW_004974095.1:4201188-4209458
MSTRG.146373.1	NW_004974095.1 : 4286239 - 4286690	ACOT7	NW_004974095.1:4191838-4201003
MSTRG.146373.1	NW_004974095.1 : 4286239 - 4286690	ICMT	NW_004974095.1:4188971-4190757
MSTRG.145840.1	NW_004974095.1 : 1080078 - 1088723	PGD	NW_004974095.1:1163181-1172111
MSTRG.145840.1	NW_004974095.1 : 1080078 - 1088723	LOC102094563	NW_004974095.1:1160780-1163293
MSTRG.145840.1	NW_004974095.1 : 1080078 - 1088723	DFFA	NW_004974095.1:1157286-1160305
MSTRG.145704.1	NW_004974095.1 : 40056 - 41600	PDPN	NW_004974095.1:113306-126461
MSTRG.145840.1	NW_004974095.1 : 1080078 - 1088723	PEX14	NW_004974095.1:1088827-1155440
MSTRG.145361.1	NW_004974090.1 : 266446 - 267155	GLCCI1	NW_004974090.1:186547-252273
MSTRG.145419.1	NW_004974090.1 : 1423143 - 1425956	LOC102096580	NW_004974090.1:1432424-1459853
MSTRG.145419.1	NW_004974090.1 : 1423143 - 1425956	NDUFA4	NW_004974090.1:1406310-1410050
MSTRG.144940.10	NW_004974073.1 : 36575 - 53898	LOC102087248	NW_004974073.1:2213-7210
MSTRG.144940.14	NW_004974073.1 : 36597 - 48266	LOC102087248	NW_004974073.1:2213-7210
MSTRG.144940.10	NW_004974073.1 : 36575 - 53898	LOC102087069	NW_004974073.1:12-2255
MSTRG.144940.14	NW_004974073.1 : 36597 - 48266	LOC102087069	NW_004974073.1:12-2255
MSTRG.144519.21	NW_004974044.1 : 367726 - 376632	PGPEP1L	NW_004974044.1:386491-401827
MSTRG.144110.1	NW_004974031.1 : 1039420 - 1040290	RAP1B	NW_004974031.1:989350-1003992
MSTRG.144110.1	NW_004974031.1 : 1039420 - 1040290	SLC35E3	NW_004974031.1:1040869-1047205
MSTRG.144110.1	NW_004974031.1 : 1039420 - 1040290	NUP107	NW_004974031.1:1007122-1039338
MSTRG.143715.18	NW_004974019.1 : 101750 - 103898	NDUFA12	NW_004974019.1:4673-17047
MSTRG.143715.18	NW_004974019.1 : 101750 - 103898	NR2C1	NW_004974019.1:24720-74005
MSTRG.143673.21	NW_004974018.1 : 184922 - 193201	TCAIM	NW_004974018.1:245477-265145
MSTRG.143673.21	NW_004974018.1 : 184922 - 193201	TRIM71	NW_004974018.1:137960-155725
MSTRG.143341.51	NW_004974009.1 : 82778 - 87229	CIZ1	NW_004974009.1:96497-119826
MSTRG.143526.1	NW_004974009.1 : 1040013 - 1040472	FUBP3	NW_004974009.1:955862-987645
MSTRG.143341.51	NW_004974009.1 : 82778 - 87229	SWI5	NW_004974009.1:5523-10122
MSTRG.143341.51	NW_004974009.1 : 82778 - 87229	DNM1	NW_004974009.1:30172-78197
MSTRG.143341.51	NW_004974009.1 : 82778 - 87229	TRUB2	NW_004974009.1:18-4184
MSTRG.143341.51	NW_004974009.1 : 82778 - 87229	GLE1	NW_004974009.1:151656-161477
MSTRG.143341.51	NW_004974009.1 : 82778 - 87229	ODF2	NW_004974009.1:132272-150775
MSTRG.143341.51	NW_004974009.1 : 82778 - 87229	PTGES2	NW_004974009.1:126188-131032
MSTRG.143341.51	NW_004974009.1 : 82778 - 87229	CUNH9orf16	NW_004974009.1:120189-121451
MSTRG.143341.51	NW_004974009.1 : 82778 - 87229	GOLGA2	NW_004974009.1:11011-29572
MSTRG.143526.1	NW_004974009.1 : 1040013 - 1040472	LOC106145991	NW_004974009.1:1069084-1074602
MSTRG.143526.1	NW_004974009.1 : 1040013 - 1040472	EXOSC2	NW_004974009.1:1007241-1011728
MSTRG.143046.33	NW_004973997.1 : 504033 - 510380	MESD	NW_004973997.1:596577-610108
MSTRG.143046.33	NW_004973997.1 : 504033 - 510380	TLNRD1	NW_004973997.1:591556-593543
MSTRG.143046.35	NW_004973997.1 : 505630 - 508527	TLNRD1	NW_004973997.1:591556-593543
MSTRG.143046.33	NW_004973997.1 : 504033 - 510380	CFAP161	NW_004973997.1:522161-527122
MSTRG.143046.35	NW_004973997.1 : 505630 - 508527	CFAP161	NW_004973997.1:522161-527122
MSTRG.143046.33	NW_004973997.1 : 504033 - 510380	IL16	NW_004973997.1:465700-496119
MSTRG.143046.35	NW_004973997.1 : 505630 - 508527	IL16	NW_004973997.1:465700-496119
MSTRG.143046.33	NW_004973997.1 : 504033 - 510380	STARD5	NW_004973997.1:457967-463389
MSTRG.143046.35	NW_004973997.1 : 505630 - 508527	STARD5	NW_004973997.1:457967-463389
MSTRG.143046.33	NW_004973997.1 : 504033 - 510380	TMC3	NW_004973997.1:432625-458407
MSTRG.143046.35	NW_004973997.1 : 505630 - 508527	TMC3	NW_004973997.1:432625-458407
MSTRG.142810.42	NW_004973985.1 : 328771 - 345611	SSBP1	NW_004973985.1:298376-310960
MSTRG.142810.42	NW_004973985.1 : 328771 - 345611	WEE2	NW_004973985.1:292023-305619
MSTRG.142810.42	NW_004973985.1 : 328771 - 345611	KIAA1147	NW_004973985.1:275783-284441
MSTRG.142810.42	NW_004973985.1 : 328771 - 345611	AGK	NW_004973985.1:231077-269687
MSTRG.142735.28	NW_004973980.1 : 340018 - 344789	DHFR	NW_004973980.1:246813-267514
MSTRG.142573.14	NW_004973971.1 : 70037 - 83625	ABI1	NW_004973971.1:83814-167107
MSTRG.142573.14	NW_004973971.1 : 70037 - 83625	MASTL	NW_004973971.1:6964-26703
MSTRG.142570.1	NW_004973971.1 : 24043 - 24706	ACBD5	NW_004973971.1:29637-60941
MSTRG.142571.2	NW_004973971.1 : 24475 - 28498	ACBD5	NW_004973971.1:29637-60941
MSTRG.142573.14	NW_004973971.1 : 70037 - 83625	ACBD5	NW_004973971.1:29637-60941
MSTRG.142591.1	NW_004973971.1 : 162842 - 164122	LOC102086694	NW_004973971.1:190639-215627
MSTRG.142591.1	NW_004973971.1 : 162842 - 164122	PDSS1	NW_004973971.1:167801-189132
MSTRG.141706.1	NW_004973947.1 : 307164 - 308577	LOC102090081	NW_004973947.1:244692-251185
MSTRG.141003.1	NW_004973925.1 : 61311 - 613073	R3HCC1	NW_004973925.1:49132-58431
MSTRG.141003.1	NW_004973925.1 : 61311 - 613073	LOC102095175	NW_004973925.1:44922-46988
MSTRG.141003.1	NW_004973925.1 : 61311 - 613073	CHMP7	NW_004973925.1:33750-42228
MSTRG.141003.1	NW_004973925.1 : 61311 - 613073	LOC102094994	NW_004973925.1:20411-29279
MSTRG.141101.1	NW_004973925.1 : 1341412 - 1489130	CUNH2orf42	NW_004973925.1:1573533-1584821
MSTRG.141101.1	NW_004973925.1 : 1341412 - 1489130	TIA1	NW_004973925.1:1563446-1572969
MSTRG.141101.1	NW_004973925.1 : 1341412 - 1489130	PCYOX1	NW_004973925.1:1558743-1560960
MSTRG.141101.1	NW_004973925.1 : 1341412 - 1489130	FAM136A	NW_004973925.1:1554529-1555078
MSTRG.141101.1	NW_004973925.1 : 1341412 - 1489130	TGFA	NW_004973925.1:1539398-1551824
MSTRG.141101.1	NW_004973925.1 : 1341412 - 1489130	SNRPG	NW_004973925.1:1532246-1557594
MSTRG.141003.1	NW_004973925.1 : 61311 - 613073	RHOBTB2	NW_004973925.1:14273-19232
MSTRG.140649.1	NW_004973922.1 : 99657 - 100306	OSBPL3	NW_004973922.1:3432-84800
MSTRG.140649.1	NW_004973922.1 : 99657 - 100306	NPVF	NW_004973922.1:173583-177223
MSTRG.140930.2	NW_004973922.1 : 1513956 - 1516289	TAX1BP1	NW_004973922.1:1431362-1494377
MSTRG.140649.1	NW_004973922.1 : 99657 - 100306	LOC102085712	NW_004973922.1:124319-125562
MSTRG.140173.19	NW_004973911.1 : 46884 - 47916	CERS3	NW_004973911.1:383-27916
MSTRG.140173.19	NW_004973911.1 : 46884 - 47916	LINS1	NW_004973911.1:28088-41494
MSTRG.140173.19	NW_004973911.1 : 46884 - 47916	LOC110355358	NW_004973911.1:131093-142176
MSTRG.140090.1	NW_004973909.1 : 125815 - 129099	ANAPC16	NW_004973909.1:195446-200030
MSTRG.140090.3	NW_004973909.1 : 127457 - 129790	ANAPC16	NW_004973909.1:195446-200030
MSTRG.140090.1	NW_004973909.1 : 125815 - 129099	DDIT4	NW_004973909.1:187585-189289
MSTRG.140090.3	NW_004973909.1 : 127457 - 129790	DDIT4	NW_004973909.1:187585-189289
MSTRG.140090.1	NW_004973909.1 : 125815 - 129099	DNAJB12	NW_004973909.1:167990-185127
MSTRG.140090.3	NW_004973909.1 : 127457 - 129790	DNAJB12	NW_004973909.1:167990-185127
MSTRG.139942.29	NW_004973904.1 : 34153 - 36636	CACNG5	NW_004973904.1:90452-109306
MSTRG.139896.9	NW_004973899.1 : 346828 - 348600	NKIRAS2	NW_004973899.1:338584-340724
MSTRG.139896.9	NW_004973899.1 : 346828 - 348600	DNAJC7	NW_004973899.1:320242-338657
MSTRG.139896.9	NW_004973899.1 : 346828 - 348600	CNP	NW_004973899.1:313462-316006
MSTRG.139896.9	NW_004973899.1 : 346828 - 348600	TTC25	NW_004973899.1:300790-311715
MSTRG.139896.9	NW_004973899.1 : 346828 - 348600	ACLY	NW_004973899.1:274270-307310
MSTRG.139896.9	NW_004973899.1 : 346828 - 348600	KLHL11	NW_004973899.1:270221-273782
MSTRG.139896.9	NW_004973899.1 : 346828 - 348600	KLHL10	NW_004973899.1:262463-266893
MSTRG.139896.9	NW_004973899.1 : 346828 - 348600	NT5C3B	NW_004973899.1:255457-262065
MSTRG.139896.9	NW_004973899.1 : 346828 - 348600	FKBP10	NW_004973899.1:249571-256026
MSTRG.139707.1	NW_004973898.1 : 374498 - 679753	FGF14	NW_004973898.1:730361-737950
MSTRG.139646.3	NW_004973896.1 : 61385 - 97532	CEP44	NW_004973896.1:69-12052
MSTRG.139603.1	NW_004973894.1 : 272183 - 273749	NEK2	NW_004973894.1:313782-322216
MSTRG.139603.1	NW_004973894.1 : 272183 - 273749	SLC30A1	NW_004973894.1:285630-293893
MSTRG.139603.1	NW_004973894.1 : 272183 - 273749	RD3	NW_004973894.1:213224-253865
MSTRG.139603.1	NW_004973894.1 : 272183 - 273749	LOC102088712	NW_004973894.1:197723-201824
MSTRG.139603.1	NW_004973894.1 : 272183 - 273749	TRAF5	NW_004973894.1:175994-196179
MSTRG.139385.3	NW_004973891.1 : 153779 - 155922	LOC102084126	NW_004973891.1:85561-101254
MSTRG.139385.3	NW_004973891.1 : 153779 - 155922	ANGPTL4	NW_004973891.1:70036-76605
MSTRG.139385.3	NW_004973891.1 : 153779 - 155922	LOC110355288	NW_004973891.1:182397-185284
MSTRG.139385.3	NW_004973891.1 : 153779 - 155922	LOC102084495	NW_004973891.1:177029-178128
MSTRG.139385.3	NW_004973891.1 : 153779 - 155922	BTN1A1	NW_004973891.1:163442-173150
MSTRG.139385.3	NW_004973891.1 : 153779 - 155922	LOC102099047	NW_004973891.1:160354-175375
MSTRG.139032.1	NW_004973886.1 : 2813320 - 2815136	LOC102088159	NW_004973886.1:2906252-2914718
MSTRG.139032.1	NW_004973886.1 : 2813320 - 2815136	LOC102095724	NW_004973886.1:2887500-2901730
MSTRG.139032.1	NW_004973886.1 : 2813320 - 2815136	EIF4E2	NW_004973886.1:2847723-2867002
MSTRG.139032.1	NW_004973886.1 : 2813320 - 2815136	CHRNG	NW_004973886.1:2839464-2844059
MSTRG.139032.1	NW_004973886.1 : 2813320 - 2815136	CHRND	NW_004973886.1:2834218-2838448
MSTRG.139032.1	NW_004973886.1 : 2813320 - 2815136	PRSS56	NW_004973886.1:2827055-2834146
MSTRG.139032.1	NW_004973886.1 : 2813320 - 2815136	SLC12A9	NW_004973886.1:2815384-2825937
MSTRG.139032.1	NW_004973886.1 : 2813320 - 2815136	ECEL1	NW_004973886.1:2800002-2810006
MSTRG.139032.1	NW_004973886.1 : 2813320 - 2815136	LOC102087604	NW_004973886.1:2795244-2799759
MSTRG.139032.1	NW_004973886.1 : 2813320 - 2815136	LOC102087425	NW_004973886.1:2787283-2792477
MSTRG.139032.1	NW_004973886.1 : 2813320 - 2815136	LOC102094747	NW_004973886.1:2784852-2787360
MSTRG.138219.3	NW_004973884.1 : 852921 - 853451	ANAPC1	NW_004973884.1:914684-943647
MSTRG.138219.3	NW_004973884.1 : 852921 - 853451	BCL2L11	NW_004973884.1:885404-892193
MSTRG.138219.3	NW_004973884.1 : 852921 - 853451	BUB1	NW_004973884.1:865069-877359
MSTRG.138219.3	NW_004973884.1 : 852921 - 853451	LOC102087721	NW_004973884.1:853891-864876
MSTRG.138219.3	NW_004973884.1 : 852921 - 853451	NPHP1	NW_004973884.1:838552-851155
MSTRG.138219.3	NW_004973884.1 : 852921 - 853451	MALL	NW_004973884.1:834244-836754
MSTRG.138219.3	NW_004973884.1 : 852921 - 853451	CHAC2	NW_004973884.1:815345-821619
MSTRG.138219.3	NW_004973884.1 : 852921 - 853451	ASB3	NW_004973884.1:813024-850562
MSTRG.138219.3	NW_004973884.1 : 852921 - 853451	ERLEC1	NW_004973884.1:801096-811060
MSTRG.138219.3	NW_004973884.1 : 852921 - 853451	LOC102090616	NW_004973884.1:793670-799372
MSTRG.138219.3	NW_004973884.1 : 852921 - 853451	GPR75	NW_004973884.1:790550-793241
MSTRG.138168.2	NW_004973884.1 : 660643 - 668164	ACYP2	NW_004973884.1:694592-727471
MSTRG.138366.1	NW_004973884.1 : 1702772 - 1703335	CRNKL1	NW_004973884.1:1621720-1631319
MSTRG.137889.2	NW_004973877.1 : 528110 - 529984	UGT1A1	NW_004973877.1:511396-526373
MSTRG.137889.2	NW_004973877.1 : 528110 - 529984	SH3BP4	NW_004973877.1:464756-500465
MSTRG.137656.1	NW_004973874.1 : 708603 - 710778	SERPINE2	NW_004973874.1:774184-795741
MSTRG.137656.1	NW_004973874.1 : 708603 - 710778	FAM124B	NW_004973874.1:691605-699926
MSTRG.137656.1	NW_004973874.1 : 708603 - 710778	CUL3	NW_004973874.1:638519-683088
MSTRG.137741.1	NW_004973874.1 : 1178619 - 1213446	FARSB	NW_004973874.1:1138022-1174354
MSTRG.137741.1	NW_004973874.1 : 1178619 - 1213446	MOGAT1	NW_004973874.1:1114416-1136630
MSTRG.136824.1	NW_004973855.1 : 751036 - 753156	ARPC5L	NW_004973855.1:837117-839224
MSTRG.136824.1	NW_004973855.1 : 751036 - 753156	PPP6C	NW_004973855.1:833855-835600
MSTRG.136824.1	NW_004973855.1 : 751036 - 753156	RABEPK	NW_004973855.1:830458-832111
MSTRG.136824.1	NW_004973855.1 : 751036 - 753156	HSPA5	NW_004973855.1:826197-829792
MSTRG.136824.1	NW_004973855.1 : 751036 - 753156	GAPVD1	NW_004973855.1:797666-825135
MSTRG.136168.1	NW_004973847.1 : 2593656 - 2595215	RAB14	NW_004973847.1:2679153-2689403
MSTRG.136168.1	NW_004973847.1 : 2593656 - 2595215	CNTRL	NW_004973847.1:2649391-2676185
MSTRG.136168.1	NW_004973847.1 : 2593656 - 2595215	C5	NW_004973847.1:2624507-2648251
MSTRG.136168.1	NW_004973847.1 : 2593656 - 2595215	TRAF1	NW_004973847.1:2605355-2619335
MSTRG.136168.1	NW_004973847.1 : 2593656 - 2595215	PHF19	NW_004973847.1:2595536-2600680
MSTRG.136168.1	NW_004973847.1 : 2593656 - 2595215	CUTA	NW_004973847.1:2586258-2593564
MSTRG.136168.1	NW_004973847.1 : 2593656 - 2595215	PSMD5	NW_004973847.1:2579291-2585595
MSTRG.136168.1	NW_004973847.1 : 2593656 - 2595215	LOC102092070	NW_004973847.1:2574476-2577900
MSTRG.136168.1	NW_004973847.1 : 2593656 - 2595215	KCNT1	NW_004973847.1:2504481-2533419
MSTRG.136008.11	NW_004973847.1 : 1922901 - 1927972	EGFL7	NW_004973847.1:1955264-1962951
MSTRG.136018.22	NW_004973847.1 : 1966049 - 1972071	EGFL7	NW_004973847.1:1955264-1962951
MSTRG.136008.11	NW_004973847.1 : 1922901 - 1927972	AGPAT2	NW_004973847.1:1944862-1954147
MSTRG.136018.22	NW_004973847.1 : 1966049 - 1972071	AGPAT2	NW_004973847.1:1944862-1954147
MSTRG.136008.11	NW_004973847.1 : 1922901 - 1927972	FAM69B	NW_004973847.1:1928935-1932558
MSTRG.136018.22	NW_004973847.1 : 1966049 - 1972071	FAM69B	NW_004973847.1:1928935-1932558
MSTRG.136008.11	NW_004973847.1 : 1922901 - 1927972	MRPS2	NW_004973847.1:1920973-1922379
MSTRG.136018.22	NW_004973847.1 : 1966049 - 1972071	MRPS2	NW_004973847.1:1920973-1922379
MSTRG.136008.11	NW_004973847.1 : 1922901 - 1927972	PPP1R26	NW_004973847.1:1910807-1919500
MSTRG.136018.22	NW_004973847.1 : 1966049 - 1972071	PPP1R26	NW_004973847.1:1910807-1919500
MSTRG.135930.17	NW_004973847.1 : 1263576 - 1264574	WDR5	NW_004973847.1:1309743-1318854
MSTRG.135930.17	NW_004973847.1 : 1263576 - 1264574	BRD3	NW_004973847.1:1269431-1306093
MSTRG.135076.1	NW_004973832.1 : 18833 - 23117	RS1	NW_004973832.1:95954-112133
MSTRG.135077.1	NW_004973832.1 : 29611 - 33737	RS1	NW_004973832.1:95954-112133
MSTRG.134947.4	NW_004973829.1 : 134618 - 144139	RPS16	NW_004973829.1:109281-111919
MSTRG.134307.21	NW_004973818.1 : 844468 - 852556	CFAP20	NW_004973818.1:919281-925065
MSTRG.134307.21	NW_004973818.1 : 844468 - 852556	LOC110354883	NW_004973818.1:910819-912303
MSTRG.134307.21	NW_004973818.1 : 844468 - 852556	MMP15	NW_004973818.1:907554-910833
MSTRG.134307.21	NW_004973818.1 : 844468 - 852556	USB1	NW_004973818.1:898344-905276
MSTRG.134307.21	NW_004973818.1 : 844468 - 852556	ZNF319	NW_004973818.1:894109-899704
MSTRG.134307.21	NW_004973818.1 : 844468 - 852556	CNGB1	NW_004973818.1:859689-891843
MSTRG.134307.21	NW_004973818.1 : 844468 - 852556	KIFC3	NW_004973818.1:832116-842027
MSTRG.134307.21	NW_004973818.1 : 844468 - 852556	KATNB1	NW_004973818.1:813720-830405
MSTRG.134307.21	NW_004973818.1 : 844468 - 852556	DRC7	NW_004973818.1:797060-811180
MSTRG.134307.21	NW_004973818.1 : 844468 - 852556	LOC102089216	NW_004973818.1:788867-795771
MSTRG.134307.21	NW_004973818.1 : 844468 - 852556	ADGRG3	NW_004973818.1:781508-788507
MSTRG.134307.21	NW_004973818.1 : 844468 - 852556	ADGRG1	NW_004973818.1:767886-781407
MSTRG.134307.21	NW_004973818.1 : 844468 - 852556	ADGRG5	NW_004973818.1:755054-762317
MSTRG.134307.21	NW_004973818.1 : 844468 - 852556	CCDC102A	NW_004973818.1:748252-754465
MSTRG.134123.4	NW_004973817.1 : 200868 - 219194	AGO2	NW_004973817.1:139479-175432
MSTRG.134123.4	NW_004973817.1 : 200868 - 219194	CHRAC1	NW_004973817.1:125513-128632
MSTRG.133880.4	NW_004973809.1 : 4895200 - 4904010	LY86	NW_004973809.1:4913215-4940925
MSTRG.133880.4	NW_004973809.1 : 4895200 - 4904010	LOC110366324	NW_004973809.1:4821281-4833421
MSTRG.133762.1	NW_004973809.1 : 4331040 - 4339959	TXNDC5	NW_004973809.1:4345802-4364907
MSTRG.133762.1	NW_004973809.1 : 4331040 - 4339959	BLOC1S5	NW_004973809.1:4290314-4308522
MSTRG.133762.1	NW_004973809.1 : 4331040 - 4339959	EEF1E1	NW_004973809.1:4265819-4282803
MSTRG.133478.20	NW_004973809.1 : 1530906 - 1729069	FAM8A1	NW_004973809.1:1804851-1814161
MSTRG.133456.1	NW_004973809.1 : 1140063 - 1149685	MYLIP	NW_004973809.1:1178545-1216230
MSTRG.132977.13	NW_004973795.1 : 321896 - 325369	SERTAD4	NW_004973795.1:243731-282706
MSTRG.132775.1	NW_004973792.1 : 473194 - 474939	CUNH9orf152	NW_004973792.1:562517-569454
MSTRG.132775.1	NW_004973792.1 : 473194 - 474939	NUB1	NW_004973792.1:535794-554439
MSTRG.132775.1	NW_004973792.1 : 473194 - 474939	LOC102083511	NW_004973792.1:512864-535894
MSTRG.132775.1	NW_004973792.1 : 473194 - 474939	CRYGN	NW_004973792.1:482198-490874
MSTRG.132768.10	NW_004973792.1 : 381066 - 388802	RHEB	NW_004973792.1:435806-472602
MSTRG.132775.1	NW_004973792.1 : 473194 - 474939	RHEB	NW_004973792.1:435806-472602
MSTRG.132768.10	NW_004973792.1 : 381066 - 388802	PRKAG2	NW_004973792.1:390054-421553
MSTRG.132775.1	NW_004973792.1 : 473194 - 474939	PRKAG2	NW_004973792.1:390054-421553
MSTRG.132865.10	NW_004973792.1 : 1999965 - 2037697	LOC102086181	NW_004973792.1:1984470-1995066
MSTRG.132865.10	NW_004973792.1 : 1999965 - 2037697	LOC110366201	NW_004973792.1:1981574-1984111
MSTRG.132865.10	NW_004973792.1 : 1999965 - 2037697	LOC102086004	NW_004973792.1:1972733-1978295
MSTRG.132865.10	NW_004973792.1 : 1999965 - 2037697	XIRP1	NW_004973792.1:1923409-1959389
MSTRG.132308.2	NW_004973790.1 : 605872 - 615332	LOC110366164	NW_004973790.1:639195-652081
MSTRG.132308.2	NW_004973790.1 : 605872 - 615332	FGF1	NW_004973790.1:638384-662316
MSTRG.132308.2	NW_004973790.1 : 605872 - 615332	SPRY4	NW_004973790.1:578279-591022
MSTRG.132308.2	NW_004973790.1 : 605872 - 615332	NDFIP1	NW_004973790.1:536345-556218
MSTRG.132308.2	NW_004973790.1 : 605872 - 615332	GNPDA1	NW_004973790.1:533111-536451
MSTRG.132308.2	NW_004973790.1 : 605872 - 615332	RNF14	NW_004973790.1:526073-531717
MSTRG.132308.2	NW_004973790.1 : 605872 - 615332	LOC102090610	NW_004973790.1:518254-524961
MSTRG.132501.3	NW_004973790.1 : 1610405 - 1619064	JAKMIP2	NW_004973790.1:1668300-1700958
MSTRG.132501.4	NW_004973790.1 : 1610405 - 1619064	JAKMIP2	NW_004973790.1:1668300-1700958
MSTRG.132501.3	NW_004973790.1 : 1610405 - 1619064	CDC23	NW_004973790.1:1647055-1655702
MSTRG.132501.4	NW_004973790.1 : 1610405 - 1619064	CDC23	NW_004973790.1:1647055-1655702
MSTRG.132501.3	NW_004973790.1 : 1610405 - 1619064	LOC102096394	NW_004973790.1:1602359-1609762
MSTRG.132501.4	NW_004973790.1 : 1610405 - 1619064	LOC102096394	NW_004973790.1:1602359-1609762
MSTRG.132501.3	NW_004973790.1 : 1610405 - 1619064	KDM3B	NW_004973790.1:1546534-1593302
MSTRG.132501.4	NW_004973790.1 : 1610405 - 1619064	KDM3B	NW_004973790.1:1546534-1593302
MSTRG.132501.3	NW_004973790.1 : 1610405 - 1619064	REEP2	NW_004973790.1:1532741-1542914
MSTRG.132501.4	NW_004973790.1 : 1610405 - 1619064	REEP2	NW_004973790.1:1532741-1542914
MSTRG.132501.3	NW_004973790.1 : 1610405 - 1619064	EGR1	NW_004973790.1:1510539-1513406
MSTRG.132501.4	NW_004973790.1 : 1610405 - 1619064	EGR1	NW_004973790.1:1510539-1513406
MSTRG.131932.1	NW_004973783.1 : 463952 - 477168	C1QB	NW_004973783.1:438143-441402
MSTRG.131939.1	NW_004973783.1 : 531138 - 584882	C1QB	NW_004973783.1:438143-441402
MSTRG.131932.1	NW_004973783.1 : 463952 - 477168	LOC102084244	NW_004973783.1:434155-436335
MSTRG.131939.1	NW_004973783.1 : 531138 - 584882	LOC102084244	NW_004973783.1:434155-436335
MSTRG.131932.1	NW_004973783.1 : 463952 - 477168	C1QA	NW_004973783.1:430809-433038
MSTRG.131825.13	NW_004973782.1 : 956080 - 975194	RBM15B	NW_004973782.1:948402-950638
MSTRG.131825.13	NW_004973782.1 : 956080 - 975194	MANF	NW_004973782.1:943485-947211
MSTRG.131288.55	NW_004973781.1 : 794482 - 800262	DIRC2	NW_004973781.1:825960-874738
MSTRG.131250.3	NW_004973781.1 : 150812 - 153690	HACD2	NW_004973781.1:122692-148156
MSTRG.131250.6	NW_004973781.1 : 150832 - 156864	HACD2	NW_004973781.1:122692-148156
MSTRG.130966.1	NW_004973776.1 : 487201 - 511132	ENPP4	NW_004973776.1:547341-553806
MSTRG.130966.1	NW_004973776.1 : 487201 - 511132	ENPP5	NW_004973776.1:534215-540480
MSTRG.130780.25	NW_004973775.1 : 8380 - 14795	MYO5C	NW_004973775.1:62926-97819
MSTRG.130780.25	NW_004973775.1 : 8380 - 14795	GNB5	NW_004973775.1:33919-58956
MSTRG.130679.3	NW_004973773.1 : 818442 - 825887	HMGB3	NW_004973773.1:867656-871277
MSTRG.130679.3	NW_004973773.1 : 818442 - 825887	CD99L2	NW_004973773.1:794014-809927
MSTRG.130679.3	NW_004973773.1 : 818442 - 825887	MTMR1	NW_004973773.1:754561-790617
MSTRG.130574.1	NW_004973773.1 : 381877 - 395658	ZNF711	NW_004973773.1:430257-447569
MSTRG.130588.12	NW_004973773.1 : 418833 - 427110	ZNF711	NW_004973773.1:430257-447569
MSTRG.130574.1	NW_004973773.1 : 381877 - 395658	POF1B	NW_004973773.1:411580-425660
MSTRG.130574.1	NW_004973773.1 : 381877 - 395658	LOC102086998	NW_004973773.1:309795-367294
MSTRG.129783.1	NW_004973760.1 : 2476743 - 2478708	LOC106145936	NW_004973760.1:2558112-2564207
MSTRG.129783.1	NW_004973760.1 : 2476743 - 2478708	RARRES2	NW_004973760.1:2556382-2557610
MSTRG.129783.1	NW_004973760.1 : 2476743 - 2478708	LOC110354869	NW_004973760.1:2538944-2548086
MSTRG.129783.1	NW_004973760.1 : 2476743 - 2478708	LOC102086003	NW_004973760.1:2526339-2530226
MSTRG.129783.1	NW_004973760.1 : 2476743 - 2478708	LOC102085827	NW_004973760.1:2510900-2519080
MSTRG.129783.1	NW_004973760.1 : 2476743 - 2478708	LOC102085296	NW_004973760.1:2498827-2502679
MSTRG.129783.1	NW_004973760.1 : 2476743 - 2478708	LOC102085116	NW_004973760.1:2481127-2497515
MSTRG.129783.1	NW_004973760.1 : 2476743 - 2478708	LOC110366016	NW_004973760.1:2464011-2465053
MSTRG.129783.1	NW_004973760.1 : 2476743 - 2478708	LOC106145935	NW_004973760.1:2461187-2464575
MSTRG.129783.1	NW_004973760.1 : 2476743 - 2478708	LOC106145934	NW_004973760.1:2456815-2461118
MSTRG.129783.1	NW_004973760.1 : 2476743 - 2478708	LOC102097118	NW_004973760.1:2452251-2453390
MSTRG.129783.1	NW_004973760.1 : 2476743 - 2478708	ZNF777	NW_004973760.1:2430665-2450088
MSTRG.129783.1	NW_004973760.1 : 2476743 - 2478708	LOC102084741	NW_004973760.1:2422780-2430994
MSTRG.129783.1	NW_004973760.1 : 2476743 - 2478708	CDC25A	NW_004973760.1:2408163-2418782
MSTRG.129746.1	NW_004973760.1 : 2180416 - 2184409	DHX30	NW_004973760.1:2196558-2234393
MSTRG.129746.1	NW_004973760.1 : 2180416 - 2184409	SMARCC1	NW_004973760.1:2101769-2171668
MSTRG.129746.1	NW_004973760.1 : 2180416 - 2184409	CSPG5	NW_004973760.1:2087127-2092930
MSTRG.127639.27	NW_004973740.1 : 344493 - 350328	TUBD1	NW_004973740.1:418478-436407
MSTRG.127639.27	NW_004973740.1 : 344493 - 350328	RPS6KB1	NW_004973740.1:400639-416359
MSTRG.127639.27	NW_004973740.1 : 344493 - 350328	RNFT1	NW_004973740.1:391801-402607
MSTRG.127627.1	NW_004973740.1 : 237290 - 255881	INTS2	NW_004973740.1:299915-316102
MSTRG.127639.27	NW_004973740.1 : 344493 - 350328	INTS2	NW_004973740.1:299915-316102
MSTRG.127639.27	NW_004973740.1 : 344493 - 350328	BRIP1	NW_004973740.1:252414-299605
MSTRG.127627.1	NW_004973740.1 : 237290 - 255881	TBX4	NW_004973740.1:147081-203544
MSTRG.127144.1	NW_004973732.1 : 1398709 - 1399251	RGS9	NW_004973732.1:1470563-1495910
MSTRG.127144.1	NW_004973732.1 : 1398709 - 1399251	GNA13	NW_004973732.1:1442196-1468742
MSTRG.127144.1	NW_004973732.1 : 1398709 - 1399251	SLC16A6	NW_004973732.1:1420609-1428428
MSTRG.127128.6	NW_004973732.1 : 1311069 - 1316130	ARSG	NW_004973732.1:1395639-1413517
MSTRG.127128.7	NW_004973732.1 : 1311069 - 1316130	ARSG	NW_004973732.1:1395639-1413517
MSTRG.127128.6	NW_004973732.1 : 1311069 - 1316130	WIPI1	NW_004973732.1:1376041-1397938
MSTRG.127128.7	NW_004973732.1 : 1311069 - 1316130	WIPI1	NW_004973732.1:1376041-1397938
MSTRG.127144.1	NW_004973732.1 : 1398709 - 1399251	WIPI1	NW_004973732.1:1376041-1397938
MSTRG.127128.6	NW_004973732.1 : 1311069 - 1316130	PRKAR1A	NW_004973732.1:1352285-1364015
MSTRG.127128.7	NW_004973732.1 : 1311069 - 1316130	PRKAR1A	NW_004973732.1:1352285-1364015
MSTRG.127144.1	NW_004973732.1 : 1398709 - 1399251	PRKAR1A	NW_004973732.1:1352285-1364015
MSTRG.127128.6	NW_004973732.1 : 1311069 - 1316130	FAM20A	NW_004973732.1:1340785-1350281
MSTRG.127128.7	NW_004973732.1 : 1311069 - 1316130	FAM20A	NW_004973732.1:1340785-1350281
MSTRG.127144.1	NW_004973732.1 : 1398709 - 1399251	FAM20A	NW_004973732.1:1340785-1350281
MSTRG.127128.6	NW_004973732.1 : 1311069 - 1316130	LOC102098860	NW_004973732.1:1286330-1310621
MSTRG.127128.7	NW_004973732.1 : 1311069 - 1316130	LOC102098860	NW_004973732.1:1286330-1310621
MSTRG.127128.6	NW_004973732.1 : 1311069 - 1316130	ABCA5	NW_004973732.1:1252807-1284562
MSTRG.127128.7	NW_004973732.1 : 1311069 - 1316130	ABCA5	NW_004973732.1:1252807-1284562
MSTRG.126598.23	NW_004973729.1 : 1327617 - 1332588	RAB9B	NW_004973729.1:1420739-1425691
MSTRG.126598.23	NW_004973729.1 : 1327617 - 1332588	PLP1	NW_004973729.1:1408916-1416174
MSTRG.126598.23	NW_004973729.1 : 1327617 - 1332588	GLRA4	NW_004973729.1:1385378-1393759
MSTRG.126598.23	NW_004973729.1 : 1327617 - 1332588	GLA	NW_004973729.1:1376003-1381653
MSTRG.126598.23	NW_004973729.1 : 1327617 - 1332588	LOC102092194	NW_004973729.1:1372330-1374684
MSTRG.126598.23	NW_004973729.1 : 1327617 - 1332588	BTK	NW_004973729.1:1360043-1370582
MSTRG.126571.14	NW_004973729.1 : 1195032 - 1208706	TMEM164	NW_004973729.1:1267920-1295336
MSTRG.126598.23	NW_004973729.1 : 1327617 - 1332588	TMEM164	NW_004973729.1:1267920-1295336
MSTRG.126571.14	NW_004973729.1 : 1195032 - 1208706	CHRDL1	NW_004973729.1:1098432-1133918
MSTRG.126311.1	NW_004973726.1 : 150782 - 151047	LRSAM1	NW_004973726.1:76924-103020
MSTRG.126306.1	NW_004973726.1 : 84750 - 85260	RPL12	NW_004973726.1:73386-75658
MSTRG.126311.1	NW_004973726.1 : 150782 - 151047	RPL12	NW_004973726.1:73386-75658
MSTRG.126306.1	NW_004973726.1 : 84750 - 85260	LOC102096640	NW_004973726.1:67-39240
MSTRG.126306.1	NW_004973726.1 : 84750 - 85260	ZMYND19	NW_004973726.1:57066-64233
MSTRG.126311.1	NW_004973726.1 : 150782 - 151047	ZMYND19	NW_004973726.1:57066-64233
MSTRG.126306.1	NW_004973726.1 : 84750 - 85260	DPH7	NW_004973726.1:42225-54992
MSTRG.126306.1	NW_004973726.1 : 84750 - 85260	MRPL41	NW_004973726.1:39049-41037
MSTRG.126311.1	NW_004973726.1 : 150782 - 151047	ALAD	NW_004973726.1:194009-208791
MSTRG.126311.1	NW_004973726.1 : 150782 - 151047	HDHD3	NW_004973726.1:193153-194230
MSTRG.126311.1	NW_004973726.1 : 150782 - 151047	BSPRY	NW_004973726.1:182301-191725
MSTRG.126306.1	NW_004973726.1 : 84750 - 85260	WDR31	NW_004973726.1:172530-180776
MSTRG.126311.1	NW_004973726.1 : 150782 - 151047	WDR31	NW_004973726.1:172530-180776
MSTRG.126306.1	NW_004973726.1 : 84750 - 85260	PRPF4	NW_004973726.1:161677-172345
MSTRG.126311.1	NW_004973726.1 : 150782 - 151047	PRPF4	NW_004973726.1:161677-172345
MSTRG.126306.1	NW_004973726.1 : 84750 - 85260	SLC31A1	NW_004973726.1:135354-161609
MSTRG.126306.1	NW_004973726.1 : 84750 - 85260	FKBP15	NW_004973726.1:107758-143663
MSTRG.126311.1	NW_004973726.1 : 150782 - 151047	FKBP15	NW_004973726.1:107758-143663
MSTRG.123963.36	NW_004973695.1 : 198709 - 249834	SKIDA1	NW_004973695.1:275809-281390
MSTRG.123762.2	NW_004973692.1 : 158226 - 164419	LOC110365530	NW_004973692.1:234310-234887
MSTRG.123762.2	NW_004973692.1 : 158226 - 164419	LIN7A	NW_004973692.1:202044-253632
MSTRG.123762.2	NW_004973692.1 : 158226 - 164419	MYF5	NW_004973692.1:178118-183663
MSTRG.123762.2	NW_004973692.1 : 158226 - 164419	MYF6	NW_004973692.1:170447-171885
MSTRG.121675.26	NW_004973689.1 : 5400082 - 5405344	MIS18A	NW_004973689.1:5423814-5428915
MSTRG.121609.1	NW_004973689.1 : 4579090 - 4580893	ATP5O	NW_004973689.1:4540594-4545807
MSTRG.120156.2	NW_004973682.1 : 81412 - 87301	ANXA11	NW_004973682.1:36356-64371
MSTRG.120158.1	NW_004973682.1 : 94841 - 95570	ANXA11	NW_004973682.1:36356-64371
MSTRG.120156.2	NW_004973682.1 : 81412 - 87301	PLAC9	NW_004973682.1:21837-35396
MSTRG.120158.1	NW_004973682.1 : 94841 - 95570	PLAC9	NW_004973682.1:21837-35396
MSTRG.119806.9	NW_004973680.1 : 4307081 - 4318605	CORO2B	NW_004973680.1:4345351-4379193
MSTRG.119806.9	NW_004973680.1 : 4307081 - 4318605	ANP32A	NW_004973680.1:4318944-4339810
MSTRG.119806.9	NW_004973680.1 : 4307081 - 4318605	NOX5	NW_004973680.1:4274846-4286537
MSTRG.119806.9	NW_004973680.1 : 4307081 - 4318605	GLCE	NW_004973680.1:4220564-4259076
MSTRG.119560.22	NW_004973680.1 : 3178092 - 3187257	VPS33B	NW_004973680.1:3270505-3279507
MSTRG.119560.22	NW_004973680.1 : 3178092 - 3187257	PRC1	NW_004973680.1:3268701-3270303
MSTRG.119560.22	NW_004973680.1 : 3178092 - 3187257	RCCD1	NW_004973680.1:3265750-3267615
MSTRG.119560.22	NW_004973680.1 : 3178092 - 3187257	UNC45A	NW_004973680.1:3256344-3262386
MSTRG.119560.22	NW_004973680.1 : 3178092 - 3187257	MAN2A2	NW_004973680.1:3244935-3253184
MSTRG.119560.22	NW_004973680.1 : 3178092 - 3187257	FES	NW_004973680.1:3237059-3244173
MSTRG.119560.22	NW_004973680.1 : 3178092 - 3187257	FURIN	NW_004973680.1:3218021-3234420
MSTRG.119560.22	NW_004973680.1 : 3178092 - 3187257	MFAP1	NW_004973680.1:3211736-3215762
MSTRG.119560.22	NW_004973680.1 : 3178092 - 3187257	SERINC4	NW_004973680.1:3204806-3209852
MSTRG.119560.22	NW_004973680.1 : 3178092 - 3187257	PDIA3	NW_004973680.1:3188751-3195856
MSTRG.119560.22	NW_004973680.1 : 3178092 - 3187257	PPIP5K1	NW_004973680.1:3129749-3170929
MSTRG.118936.40	NW_004973678.1 : 1573770 - 1580095	CCND1	NW_004973678.1:1581778-1599062
MSTRG.118936.40	NW_004973678.1 : 1573770 - 1580095	FGF19	NW_004973678.1:1554965-1560173
MSTRG.118936.40	NW_004973678.1 : 1573770 - 1580095	FGF4	NW_004973678.1:1526180-1529172
MSTRG.118936.40	NW_004973678.1 : 1573770 - 1580095	FGF3	NW_004973678.1:1491258-1497716
MSTRG.118708.15	NW_004973677.1 : 396249 - 400123	LOC102094323	NW_004973677.1:297171-334537
MSTRG.118365.1	NW_004973673.1 : 698761 - 703397	GPRIN3	NW_004973673.1:715937-744195
MSTRG.118269.2	NW_004973673.1 : 8 - 1839	ERI1	NW_004973673.1:2571-13677
MSTRG.118278.1	NW_004973673.1 : 97331 - 104725	ERI1	NW_004973673.1:2571-13677
MSTRG.118269.2	NW_004973673.1 : 8 - 1839	MFHAS1	NW_004973673.1:20822-52024
MSTRG.118278.1	NW_004973673.1 : 97331 - 104725	MFHAS1	NW_004973673.1:20822-52024
MSTRG.118226.1	NW_004973670.1 : 31215 - 32363	ABCF2	NW_004973670.1:8802-23268
MSTRG.118226.1	NW_004973670.1 : 31215 - 32363	LOC102085164	NW_004973670.1:5916-9457
MSTRG.118226.1	NW_004973670.1 : 31215 - 32363	LOC102085520	NW_004973670.1:39147-48314
MSTRG.118226.1	NW_004973670.1 : 31215 - 32363	LOC102085342	NW_004973670.1:27785-28568
MSTRG.118204.1	NW_004973669.1 : 69955 - 72066	LOC102083689	NW_004973669.1:93886-98356
MSTRG.118204.1	NW_004973669.1 : 69955 - 72066	LOC102084237	NW_004973669.1:8478-17733
MSTRG.118204.1	NW_004973669.1 : 69955 - 72066	LOC106145646	NW_004973669.1:80854-94179
MSTRG.118204.1	NW_004973669.1 : 69955 - 72066	AOC1	NW_004973669.1:52508-54850
MSTRG.118204.1	NW_004973669.1 : 69955 - 72066	LOC102084420	NW_004973669.1:25550-52185
MSTRG.118204.1	NW_004973669.1 : 69955 - 72066	LOC102084048	NW_004973669.1:2092-7986
MSTRG.118204.1	NW_004973669.1 : 69955 - 72066	LOC102084983	NW_004973669.1:102407-130869
MSTRG.117449.2	NW_004973662.1 : 306211 - 338288	SCRG1	NW_004973662.1:420499-428607
MSTRG.117449.2	NW_004973662.1 : 306211 - 338288	LOC110365031	NW_004973662.1:345712-347323
MSTRG.116433.17	NW_004973652.1 : 619125 - 622871	CRIPT	NW_004973652.1:664707-669843
MSTRG.116433.17	NW_004973652.1 : 619125 - 622871	RHOQ	NW_004973652.1:641610-644381
MSTRG.116433.17	NW_004973652.1 : 619125 - 622871	PIGF	NW_004973652.1:632726-664132
MSTRG.116433.17	NW_004973652.1 : 619125 - 622871	TMEM247	NW_004973652.1:566338-570037
MSTRG.116433.17	NW_004973652.1 : 619125 - 622871	LOC110364947	NW_004973652.1:521685-563978
MSTRG.116345.11	NW_004973647.1 : 695823 - 698791	FANCB	NW_004973647.1:678520-695708
MSTRG.116345.11	NW_004973647.1 : 695823 - 698791	MOSPD2	NW_004973647.1:645195-678158
MSTRG.116271.1	NW_004973647.1 : 274736 - 328759	ASB11	NW_004973647.1:405438-419316
MSTRG.116276.1	NW_004973647.1 : 328885 - 337633	ASB11	NW_004973647.1:405438-419316
MSTRG.116271.1	NW_004973647.1 : 274736 - 328759	PIGA	NW_004973647.1:392688-400463
MSTRG.116276.1	NW_004973647.1 : 328885 - 337633	PIGA	NW_004973647.1:392688-400463
MSTRG.116271.1	NW_004973647.1 : 274736 - 328759	VEGFD	NW_004973647.1:342725-379245
MSTRG.116276.1	NW_004973647.1 : 328885 - 337633	VEGFD	NW_004973647.1:342725-379245
MSTRG.116276.1	NW_004973647.1 : 328885 - 337633	BMX	NW_004973647.1:260213-282950
MSTRG.116271.1	NW_004973647.1 : 274736 - 328759	ACE2	NW_004973647.1:226938-258102
MSTRG.116271.2	NW_004973647.1 : 274736 - 277657	ACE2	NW_004973647.1:226938-258102
MSTRG.116271.1	NW_004973647.1 : 274736 - 328759	TMEM27	NW_004973647.1:194589-220407
MSTRG.116271.2	NW_004973647.1 : 274736 - 277657	TMEM27	NW_004973647.1:194589-220407
MSTRG.116271.1	NW_004973647.1 : 274736 - 328759	ZRSR2	NW_004973647.1:177791-194390
MSTRG.116271.2	NW_004973647.1 : 274736 - 277657	ZRSR2	NW_004973647.1:177791-194390
MSTRG.116107.1	NW_004973646.1 : 478034 - 560013	DDIAS	NW_004973646.1:632403-642069
MSTRG.116107.1	NW_004973646.1 : 478034 - 560013	PRCP	NW_004973646.1:601045-632004
MSTRG.115959.1	NW_004973643.1 : 974677 - 975186	STRAP	NW_004973643.1:940864-949361
MSTRG.116018.1	NW_004973643.1 : 1832838 - 1834990	RERGL	NW_004973643.1:1762858-1772655
MSTRG.115716.1	NW_004973642.1 : 697954 - 700740	ESF1	NW_004973642.1:767469-798484
MSTRG.115716.1	NW_004973642.1 : 697954 - 700740	NDUFAF5	NW_004973642.1:759281-766995
MSTRG.115716.1	NW_004973642.1 : 697954 - 700740	FLRT3	NW_004973642.1:599220-611484
MSTRG.115236.2	NW_004973640.1 : 702216 - 713414	SYNPO2	NW_004973640.1:715246-806691
MSTRG.115236.2	NW_004973640.1 : 702216 - 713414	METTL14	NW_004973640.1:623155-646795
MSTRG.115546.27	NW_004973640.1 : 2374703 - 2376523	SPRY1	NW_004973640.1:2395538-2397804
MSTRG.115562.1	NW_004973640.1 : 2343121 - 2348578	SPRY1	NW_004973640.1:2395538-2397804
MSTRG.115571.3	NW_004973640.1 : 2492674 - 2502477	SPRY1	NW_004973640.1:2395538-2397804
MSTRG.115520.46	NW_004973640.1 : 2149065 - 2152721	NUDT6	NW_004973640.1:2155578-2168647
MSTRG.115537.2	NW_004973640.1 : 2113732 - 2125409	NUDT6	NW_004973640.1:2155578-2168647
MSTRG.115537.2	NW_004973640.1 : 2113732 - 2125409	FGF2	NW_004973640.1:2142752-2155466
MSTRG.115520.46	NW_004973640.1 : 2149065 - 2152721	LOC102091950	NW_004973640.1:2083603-2089618
MSTRG.115537.2	NW_004973640.1 : 2113732 - 2125409	LOC102091950	NW_004973640.1:2083603-2089618
MSTRG.115520.46	NW_004973640.1 : 2149065 - 2152721	BBS12	NW_004973640.1:2056487-2123404
MSTRG.115511.64	NW_004973640.1 : 1961142 - 1962333	ADAD1	NW_004973640.1:1965459-1977867
MSTRG.114891.54	NW_004973637.1 : 592788 - 953038	LOC102084926	NW_004973637.1:961653-980843
MSTRG.114923.1	NW_004973637.1 : 471339 - 515429	NKTR	NW_004973637.1:412082-460633
MSTRG.114923.1	NW_004973637.1 : 471339 - 515429	ZBTB47	NW_004973637.1:373113-385620
MSTRG.114849.42	NW_004973636.1 : 964667 - 967910	THOC7	NW_004973636.1:990285-999511
MSTRG.114849.42	NW_004973636.1 : 964667 - 967910	ATXN7	NW_004973636.1:903258-963438
MSTRG.114849.42	NW_004973636.1 : 964667 - 967910	PSMD6	NW_004973636.1:890013-895213
MSTRG.114849.42	NW_004973636.1 : 964667 - 967910	SNTN	NW_004973636.1:1037237-1040041
MSTRG.114665.14	NW_004973635.1 : 305332 - 345574	PFN2	NW_004973635.1:273964-276483
MSTRG.114696.1	NW_004973635.1 : 344668 - 348775	PFN2	NW_004973635.1:273964-276483
MSTRG.114665.14	NW_004973635.1 : 305332 - 345574	RNF13	NW_004973635.1:253330-269998
MSTRG.114696.1	NW_004973635.1 : 344668 - 348775	RNF13	NW_004973635.1:253330-269998
MSTRG.114665.14	NW_004973635.1 : 305332 - 345574	COMMD2	NW_004973635.1:244755-248320
MSTRG.114696.1	NW_004973635.1 : 344668 - 348775	COMMD2	NW_004973635.1:244755-248320
MSTRG.114543.1	NW_004973633.1 : 286929 - 288539	ZNF395	NW_004973633.1:260746-273104
MSTRG.114544.1	NW_004973633.1 : 319181 - 352365	ZNF395	NW_004973633.1:260746-273104
MSTRG.114543.1	NW_004973633.1 : 286929 - 288539	PNOC	NW_004973633.1:246903-255721
MSTRG.114544.1	NW_004973633.1 : 319181 - 352365	PNOC	NW_004973633.1:246903-255721
MSTRG.114543.1	NW_004973633.1 : 286929 - 288539	LOC102090600	NW_004973633.1:226551-235561
MSTRG.114544.1	NW_004973633.1 : 319181 - 352365	LOC102090600	NW_004973633.1:226551-235561
MSTRG.114445.45	NW_004973632.1 : 134980 - 138022	GADD45G	NW_004973632.1:199352-200730
MSTRG.114342.3	NW_004973628.1 : 1000121 - 1001310	LOC102086425	NW_004973628.1:1092849-1093844
MSTRG.113399.1	NW_004973623.1 : 258452 - 270646	DUSP16	NW_004973623.1:281894-323051
MSTRG.113399.1	NW_004973623.1 : 258452 - 270646	MANSC1	NW_004973623.1:191058-197685
MSTRG.112615.26	NW_004973619.1 : 1194735 - 1213323	TBC1D22B	NW_004973619.1:1262555-1272665
MSTRG.112617.1	NW_004973619.1 : 1196330 - 1197297	TBC1D22B	NW_004973619.1:1262555-1272665
MSTRG.112615.26	NW_004973619.1 : 1194735 - 1213323	PIM1	NW_004973619.1:1247579-1253568
MSTRG.112617.1	NW_004973619.1 : 1196330 - 1197297	PIM1	NW_004973619.1:1247579-1253568
MSTRG.112615.26	NW_004973619.1 : 1194735 - 1213323	MTCH1	NW_004973619.1:1218021-1224399
MSTRG.112617.1	NW_004973619.1 : 1196330 - 1197297	MTCH1	NW_004973619.1:1218021-1224399
MSTRG.112615.26	NW_004973619.1 : 1194735 - 1213323	CUNH6orf89	NW_004973619.1:1163602-1183509
MSTRG.112617.1	NW_004973619.1 : 1196330 - 1197297	CUNH6orf89	NW_004973619.1:1163602-1183509
MSTRG.112615.26	NW_004973619.1 : 1194735 - 1213323	RAB44	NW_004973619.1:1149392-1162145
MSTRG.112617.1	NW_004973619.1 : 1196330 - 1197297	RAB44	NW_004973619.1:1149392-1162145
MSTRG.112615.26	NW_004973619.1 : 1194735 - 1213323	CDKN1A	NW_004973619.1:1143957-1149052
MSTRG.112617.1	NW_004973619.1 : 1196330 - 1197297	CDKN1A	NW_004973619.1:1143957-1149052
MSTRG.112615.26	NW_004973619.1 : 1194735 - 1213323	SRSF3	NW_004973619.1:1128618-1134572
MSTRG.112617.1	NW_004973619.1 : 1196330 - 1197297	SRSF3	NW_004973619.1:1128618-1134572
MSTRG.112615.26	NW_004973619.1 : 1194735 - 1213323	LOC110364660	NW_004973619.1:1120481-1123527
MSTRG.112617.1	NW_004973619.1 : 1196330 - 1197297	LOC110364660	NW_004973619.1:1120481-1123527
MSTRG.112615.26	NW_004973619.1 : 1194735 - 1213323	STK38	NW_004973619.1:1106211-1118228
MSTRG.112617.1	NW_004973619.1 : 1196330 - 1197297	STK38	NW_004973619.1:1106211-1118228
MSTRG.112163.2	NW_004973615.1 : 146110 - 161767	ARHGEF7	NW_004973615.1:62821-140749
MSTRG.112006.3	NW_004973614.1 : 90563 - 98727	ECHDC3	NW_004973614.1:50679-58375
MSTRG.112006.3	NW_004973614.1 : 90563 - 98727	UPF2	NW_004973614.1:128932-176184
MSTRG.111544.2	NW_004973609.1 : 645558 - 646481	SLC16A10	NW_004973609.1:667466-734559
MSTRG.111544.2	NW_004973609.1 : 645558 - 646481	RPF2	NW_004973609.1:622326-643956
MSTRG.111544.2	NW_004973609.1 : 645558 - 646481	AMD1	NW_004973609.1:592478-603598
MSTRG.111492.2	NW_004973609.1 : 381859 - 400926	SLC22A16	NW_004973609.1:341814-359335
MSTRG.111492.2	NW_004973609.1 : 381859 - 400926	DDO	NW_004973609.1:325632-336424
MSTRG.111808.2	NW_004973609.1 : 2161485 - 2162161	HDAC2	NW_004973609.1:2163223-2179387
MSTRG.111826.18	NW_004973609.1 : 2261207 - 2265672	HDAC2	NW_004973609.1:2163223-2179387
MSTRG.111406.38	NW_004973607.1 : 1827716 - 1837030	CSRP2	NW_004973607.1:1859578-1864938
MSTRG.111366.3	NW_004973607.1 : 1491965 - 1499406	NAP1L1	NW_004973607.1:1511687-1549540
MSTRG.110543.1	NW_004973602.1 : 785759 - 788520	LOC110364482	NW_004973602.1:840062-846662
MSTRG.110543.1	NW_004973602.1 : 785759 - 788520	EZH2	NW_004973602.1:788697-819514
MSTRG.110227.2	NW_004973599.1 : 1 - 22802	ASB14	NW_004973599.1:73595-103740
MSTRG.110227.2	NW_004973599.1 : 1 - 22802	APPL1	NW_004973599.1:71040-94182
MSTRG.110227.2	NW_004973599.1 : 1 - 22802	HESX1	NW_004973599.1:48081-70562
MSTRG.110227.2	NW_004973599.1 : 1 - 22802	IL17RD	NW_004973599.1:23229-63808
MSTRG.109707.1	NW_004973595.1 : 1468437 - 1469219	LOC102091144	NW_004973595.1:1532575-1550062
MSTRG.109707.1	NW_004973595.1 : 1468437 - 1469219	LYSMD2	NW_004973595.1:1500304-1510200
MSTRG.109707.1	NW_004973595.1 : 1468437 - 1469219	SCG3	NW_004973595.1:1471687-1495442
MSTRG.109707.1	NW_004973595.1 : 1468437 - 1469219	AP4E1	NW_004973595.1:1446014-1464656
MSTRG.109707.1	NW_004973595.1 : 1468437 - 1469219	TNFAIP8L3	NW_004973595.1:1433591-1442032
MSTRG.109336.2	NW_004973593.1 : 226488 - 234404	KCTD3	NW_004973593.1:201646-226014
MSTRG.109211.1	NW_004973590.1 : 192839 - 258997	KIF27	NW_004973590.1:157379-191142
MSTRG.109211.1	NW_004973590.1 : 192839 - 258997	CUNH9orf64	NW_004973590.1:150342-156937
MSTRG.109211.1	NW_004973590.1 : 192839 - 258997	HNRNPK	NW_004973590.1:127622-148675
MSTRG.109211.1	NW_004973590.1 : 192839 - 258997	RMI1	NW_004973590.1:122737-127729
MSTRG.109084.1	NW_004973589.1 : 69231 - 71339	NOD1	NW_004973589.1:73403-96309
MSTRG.109100.3	NW_004973589.1 : 524060 - 527461	ABHD5	NW_004973589.1:549880-561985
MSTRG.109143.1	NW_004973589.1 : 474799 - 477737	ABHD5	NW_004973589.1:549880-561985
MSTRG.109084.1	NW_004973589.1 : 69231 - 71339	ENTPD3	NW_004973589.1:142886-164593
MSTRG.109084.1	NW_004973589.1 : 69231 - 71339	GGCT	NW_004973589.1:105066-112218
MSTRG.109063.55	NW_004973588.1 : 41718 - 87371	LOC102095538	NW_004973588.1:92562-111633
MSTRG.109063.64	NW_004973588.1 : 41852 - 83264	LOC102095538	NW_004973588.1:92562-111633
MSTRG.109063.55	NW_004973588.1 : 41718 - 87371	LOC102096270	NW_004973588.1:21936-36885
MSTRG.109063.64	NW_004973588.1 : 41852 - 83264	LOC102096270	NW_004973588.1:21936-36885
MSTRG.109063.55	NW_004973588.1 : 41718 - 87371	TMEM220	NW_004973588.1:179126-182675
MSTRG.109063.64	NW_004973588.1 : 41852 - 83264	TMEM220	NW_004973588.1:179126-182675
MSTRG.109063.55	NW_004973588.1 : 41718 - 87371	ADPRM	NW_004973588.1:175508-178813
MSTRG.109063.64	NW_004973588.1 : 41852 - 83264	ADPRM	NW_004973588.1:175508-178813
MSTRG.109063.55	NW_004973588.1 : 41718 - 87371	LOC102095905	NW_004973588.1:168322-174852
MSTRG.109063.64	NW_004973588.1 : 41852 - 83264	LOC102095905	NW_004973588.1:168322-174852
MSTRG.109063.55	NW_004973588.1 : 41718 - 87371	LOC102096089	NW_004973588.1:144-10942
MSTRG.109063.64	NW_004973588.1 : 41852 - 83264	LOC102096089	NW_004973588.1:144-10942
MSTRG.109063.55	NW_004973588.1 : 41718 - 87371	LOC102096636	NW_004973588.1:131353-161876
MSTRG.109063.64	NW_004973588.1 : 41852 - 83264	LOC102096636	NW_004973588.1:131353-161876
MSTRG.108969.1	NW_004973586.1 : 391076 - 392696	IRX4	NW_004973586.1:453102-455835
MSTRG.108969.1	NW_004973586.1 : 391076 - 392696	NDUFS6	NW_004973586.1:376839-383740
MSTRG.108527.11	NW_004973582.1 : 227923 - 239335	FAM53A	NW_004973582.1:140016-204245
MSTRG.108366.32	NW_004973581.1 : 498971 - 500729	REPS2	NW_004973581.1:420442-491652
MSTRG.108315.2	NW_004973580.1 : 100172 - 104411	LOC102095410	NW_004973580.1:88838-95201
MSTRG.108315.2	NW_004973580.1 : 100172 - 104411	CRTC2	NW_004973580.1:77473-86435
MSTRG.108315.2	NW_004973580.1 : 100172 - 104411	LOC102095222	NW_004973580.1:63490-67450
MSTRG.108315.2	NW_004973580.1 : 100172 - 104411	RPS27	NW_004973580.1:61268-63315
MSTRG.108315.2	NW_004973580.1 : 100172 - 104411	TPM3	NW_004973580.1:48127-58798
MSTRG.108315.2	NW_004973580.1 : 100172 - 104411	CUNH1orf43	NW_004973580.1:36379-38885
MSTRG.108315.2	NW_004973580.1 : 100172 - 104411	UBAP2L	NW_004973580.1:13170-33079
MSTRG.108315.2	NW_004973580.1 : 100172 - 104411	GATAD2B	NW_004973580.1:113212-122583
MSTRG.108315.2	NW_004973580.1 : 100172 - 104411	HAX1	NW_004973580.1:10118-11635
MSTRG.108144.1	NW_004973578.1 : 964468 - 964923	TMX2	NW_004973578.1:961388-962975
MSTRG.108144.1	NW_004973578.1 : 964468 - 964923	ZDHHC5	NW_004973578.1:947503-957352
MSTRG.108144.1	NW_004973578.1 : 964468 - 964923	CLP1	NW_004973578.1:938199-942548
MSTRG.108144.1	NW_004973578.1 : 964468 - 964923	SERPING1	NW_004973578.1:932313-934945
MSTRG.108144.1	NW_004973578.1 : 964468 - 964923	LOC102091391	NW_004973578.1:929711-930592
MSTRG.108144.1	NW_004973578.1 : 964468 - 964923	TIMM10	NW_004973578.1:924565-924863
MSTRG.108144.1	NW_004973578.1 : 964468 - 964923	RTN4RL2	NW_004973578.1:921929-924389
MSTRG.108144.1	NW_004973578.1 : 964468 - 964923	SLC43A3	NW_004973578.1:908494-914815
MSTRG.108144.1	NW_004973578.1 : 964468 - 964923	P2RX3	NW_004973578.1:900543-902492
MSTRG.108144.1	NW_004973578.1 : 964468 - 964923	SSRP1	NW_004973578.1:891801-897865
MSTRG.108144.1	NW_004973578.1 : 964468 - 964923	TNKS1BP1	NW_004973578.1:881944-889274
MSTRG.108144.1	NW_004973578.1 : 964468 - 964923	APLNR	NW_004973578.1:875248-879134
MSTRG.108069.1	NW_004973578.1 : 774859 - 778155	LOC102090307	NW_004973578.1:856184-868395
MSTRG.108069.1	NW_004973578.1 : 774859 - 778155	LOC102090131	NW_004973578.1:839856-854634
MSTRG.108069.1	NW_004973578.1 : 774859 - 778155	LOC110364216	NW_004973578.1:838169-839832
MSTRG.108069.1	NW_004973578.1 : 774859 - 778155	VPS51	NW_004973578.1:834672-837398
MSTRG.108069.1	NW_004973578.1 : 774859 - 778155	BET1L	NW_004973578.1:826984-830587
MSTRG.108069.1	NW_004973578.1 : 774859 - 778155	RIC8A	NW_004973578.1:817279-828680
MSTRG.108069.1	NW_004973578.1 : 774859 - 778155	SIRT3	NW_004973578.1:809778-814216
MSTRG.108069.1	NW_004973578.1 : 774859 - 778155	PSMD13	NW_004973578.1:802354-809794
MSTRG.108069.1	NW_004973578.1 : 774859 - 778155	PGGHG	NW_004973578.1:789501-797901
MSTRG.108069.1	NW_004973578.1 : 774859 - 778155	B4GALNT4	NW_004973578.1:755074-767435
MSTRG.108069.1	NW_004973578.1 : 774859 - 778155	PKP3	NW_004973578.1:743173-754810
MSTRG.108069.1	NW_004973578.1 : 774859 - 778155	SIGIRR	NW_004973578.1:738404-742933
MSTRG.108069.1	NW_004973578.1 : 774859 - 778155	ANO9	NW_004973578.1:722445-736429
MSTRG.108069.1	NW_004973578.1 : 774859 - 778155	PTDSS2	NW_004973578.1:688388-716311
MSTRG.108069.1	NW_004973578.1 : 774859 - 778155	SYT12	NW_004973578.1:676544-682583
MSTRG.107780.11	NW_004973577.1 : 153570 - 168249	LOC102092918	NW_004973577.1:256265-260459
MSTRG.107780.11	NW_004973577.1 : 153570 - 168249	GLIPR2	NW_004973577.1:199518-229076
MSTRG.107780.11	NW_004973577.1 : 153570 - 168249	BLOC1S4	NW_004973577.1:181321-187648
MSTRG.107262.2	NW_004973575.1 : 172446 - 174408	LOC102086866	NW_004973575.1:83501-116944
MSTRG.107421.1	NW_004973575.1 : 779382 - 795402	LOC102083810	NW_004973575.1:732407-751209
MSTRG.107421.1	NW_004973575.1 : 779382 - 795402	NECAP1	NW_004973575.1:721202-732262
MSTRG.107421.1	NW_004973575.1 : 779382 - 795402	LOC102083630	NW_004973575.1:707549-710971
MSTRG.107262.2	NW_004973575.1 : 172446 - 174408	M6PR	NW_004973575.1:265867-269635
MSTRG.107262.2	NW_004973575.1 : 172446 - 174408	LOC102097712	NW_004973575.1:248892-263734
MSTRG.107262.2	NW_004973575.1 : 172446 - 174408	LOC102097889	NW_004973575.1:227838-247832
MSTRG.107262.2	NW_004973575.1 : 172446 - 174408	LOC102097046	NW_004973575.1:134674-162599
MSTRG.106506.1	NW_004973569.1 : 2006311 - 2013187	CTPS1	NW_004973569.1:2086701-2099790
MSTRG.106506.1	NW_004973569.1 : 2006311 - 2013187	LOC102093870	NW_004973569.1:1995146-1997059
MSTRG.106506.1	NW_004973569.1 : 2006311 - 2013187	STX12	NW_004973569.1:1982792-1988789
MSTRG.106506.1	NW_004973569.1 : 2006311 - 2013187	PPP1R8	NW_004973569.1:1972420-1979049
MSTRG.106506.1	NW_004973569.1 : 2006311 - 2013187	GJA9	NW_004973569.1:1967764-1970832
MSTRG.106506.1	NW_004973569.1 : 2006311 - 2013187	MYCBP	NW_004973569.1:1962892-1965588
MSTRG.106506.1	NW_004973569.1 : 2006311 - 2013187	RRAGC	NW_004973569.1:1953978-1961425
MSTRG.106021.2	NW_004973568.1 : 951416 - 957373	PLEKHB2	NW_004973568.1:924635-935022
MSTRG.106024.24	NW_004973568.1 : 1024552 - 1029607	PLEKHB2	NW_004973568.1:924635-935022
MSTRG.105256.45	NW_004973557.1 : 350577 - 469897	PPARA	NW_004973557.1:271775-314325
MSTRG.105256.66	NW_004973557.1 : 360855 - 610737	PPARA	NW_004973557.1:271775-314325
MSTRG.104528.3	NW_004973553.1 : 1017188 - 1020133	ARHGEF37	NW_004973553.1:985145-998357
MSTRG.104528.3	NW_004973553.1 : 1017188 - 1020133	CSNK1A1	NW_004973553.1:932760-968339
MSTRG.104391.11	NW_004973553.1 : 328498 - 333344	DUSP1	NW_004973553.1:289820-292457
MSTRG.104528.3	NW_004973553.1 : 1017188 - 1020133	PPARGC1B	NW_004973553.1:1051418-1064209
MSTRG.103037.1	NW_004973548.1 : 265227 - 266779	PWWP2B	NW_004973548.1:352895-365610
MSTRG.103037.1	NW_004973548.1 : 265227 - 266779	DPYSL4	NW_004973548.1:224614-237221
MSTRG.102433.2	NW_004973541.1 : 60267 - 61215	LOC102096815	NW_004973541.1:9422-48010
MSTRG.102433.2	NW_004973541.1 : 60267 - 61215	TRIP4	NW_004973541.1:77003-106485
MSTRG.102521.9	NW_004973541.1 : 526985 - 527486	LOC102098786	NW_004973541.1:563036-564118
MSTRG.102499.2	NW_004973541.1 : 428996 - 432016	SHF	NW_004973541.1:513417-523763
MSTRG.102521.9	NW_004973541.1 : 526985 - 527486	SHF	NW_004973541.1:513417-523763
MSTRG.102499.2	NW_004973541.1 : 428996 - 432016	LOC102098248	NW_004973541.1:481169-490424
MSTRG.102521.9	NW_004973541.1 : 526985 - 527486	LOC102098248	NW_004973541.1:481169-490424
MSTRG.102499.2	NW_004973541.1 : 428996 - 432016	ALPK3	NW_004973541.1:450849-479688
MSTRG.102521.9	NW_004973541.1 : 526985 - 527486	ALPK3	NW_004973541.1:450849-479688
MSTRG.102499.2	NW_004973541.1 : 428996 - 432016	ZNF592	NW_004973541.1:354554-393454
MSTRG.102499.2	NW_004973541.1 : 428996 - 432016	SEC11A	NW_004973541.1:343765-352647
MSTRG.102284.1	NW_004973538.1 : 240346 - 243080	ASB1	NW_004973538.1:155161-169863
MSTRG.102005.1	NW_004973537.1 : 959697 - 962935	PEX2	NW_004973537.1:906168-925318
MSTRG.102006.1	NW_004973537.1 : 964045 - 969293	PEX2	NW_004973537.1:906168-925318
MSTRG.102168.1	NW_004973537.1 : 2364852 - 2367012	ELOC	NW_004973537.1:2428243-2432628
MSTRG.102168.1	NW_004973537.1 : 2364852 - 2367012	TMEM70	NW_004973537.1:2416619-2418553
MSTRG.102168.1	NW_004973537.1 : 2364852 - 2367012	LY96	NW_004973537.1:2401792-2407783
MSTRG.101548.1	NW_004973536.1 : 759574 - 839368	LOC102095784	NW_004973536.1:840234-881339
MSTRG.101548.1	NW_004973536.1 : 759574 - 839368	SORL1	NW_004973536.1:679020-717473
MSTRG.101548.1	NW_004973536.1 : 759574 - 839368	SC5D	NW_004973536.1:665143-668502
MSTRG.101512.1	NW_004973536.1 : 412864 - 442880	LOC110363777	NW_004973536.1:508981-521735
MSTRG.101512.1	NW_004973536.1 : 412864 - 442880	LOC102094791	NW_004973536.1:343481-356899
MSTRG.101512.1	NW_004973536.1 : 412864 - 442880	LOC102085106	NW_004973536.1:339561-341812
MSTRG.101512.1	NW_004973536.1 : 412864 - 442880	EI24	NW_004973536.1:323819-328852
MSTRG.101512.1	NW_004973536.1 : 412864 - 442880	STT3A	NW_004973536.1:313845-320858
MSTRG.101764.1	NW_004973536.1 : 2164673 - 2167328	LOC102087654	NW_004973536.1:2074805-2114862
MSTRG.101373.1	NW_004973535.1 : 140879 - 144565	LOC110363743	NW_004973535.1:93162-99430
MSTRG.101373.2	NW_004973535.1 : 140893 - 142461	LOC110363743	NW_004973535.1:93162-99430
MSTRG.101373.1	NW_004973535.1 : 140879 - 144565	SMYD5	NW_004973535.1:54575-63554
MSTRG.101373.2	NW_004973535.1 : 140893 - 142461	SMYD5	NW_004973535.1:54575-63554
MSTRG.101373.1	NW_004973535.1 : 140879 - 144565	PRADC1	NW_004973535.1:51148-54307
MSTRG.101373.2	NW_004973535.1 : 140893 - 142461	PRADC1	NW_004973535.1:51148-54307
MSTRG.101373.2	NW_004973535.1 : 140893 - 142461	SFXN5	NW_004973535.1:143402-241129
MSTRG.101373.1	NW_004973535.1 : 140879 - 144565	LOC102093218	NW_004973535.1:114436-139822
MSTRG.101373.2	NW_004973535.1 : 140893 - 142461	LOC102093218	NW_004973535.1:114436-139822
MSTRG.101322.1	NW_004973534.1 : 387119 - 387837	ACAA2	NW_004973534.1:463634-479275
MSTRG.101322.1	NW_004973534.1 : 387119 - 387837	RPL17	NW_004973534.1:369420-372817
MSTRG.101322.1	NW_004973534.1 : 387119 - 387837	CUNH18orf32	NW_004973534.1:364203-369249
MSTRG.101271.1	NW_004973534.1 : 1 - 36947	SMAD7	NW_004973534.1:105883-132503
MSTRG.101263.1	NW_004973532.1 : 254211 - 260049	LOC102089574	NW_004973532.1:261213-352264
MSTRG.101075.1	NW_004973530.1 : 149396 - 470324	LOC102087960	NW_004973530.1:52741-78263
MSTRG.100603.49	NW_004973527.1 : 1385680 - 1396233	LOC102097417	NW_004973527.1:1477767-1482880
MSTRG.100603.49	NW_004973527.1 : 1385680 - 1396233	CDS1	NW_004973527.1:1422341-1450411
MSTRG.100021.1	NW_004973523.1 : 557009 - 560838	IRS2	NW_004973523.1:575781-580838
MSTRG.99904.19	NW_004973523.1 : 108879 - 118797	NAXD	NW_004973523.1:14798-65059
MSTRG.99904.20	NW_004973523.1 : 109805 - 118739	NAXD	NW_004973523.1:14798-65059
MSTRG.99245.1	NW_004973519.1 : 1887881 - 1889974	LOC102087354	NW_004973519.1:1907158-1926566
MSTRG.99245.1	NW_004973519.1 : 1887881 - 1889974	LOC102087172	NW_004973519.1:1869674-1883473
MSTRG.98656.3	NW_004973518.1 : 94952 - 96618	NT5DC2	NW_004973518.1:97600-124465
MSTRG.98656.3	NW_004973518.1 : 94952 - 96618	GLT8D1	NW_004973518.1:8999-16029
MSTRG.98766.5	NW_004973518.1 : 764872 - 771109	GLYCTK	NW_004973518.1:773414-777834
MSTRG.98766.5	NW_004973518.1 : 764872 - 771109	WDR82	NW_004973518.1:746747-764626
MSTRG.98766.5	NW_004973518.1 : 764872 - 771109	PPM1M	NW_004973518.1:739889-746053
MSTRG.98766.5	NW_004973518.1 : 764872 - 771109	TWF2	NW_004973518.1:715127-728803
MSTRG.98766.5	NW_004973518.1 : 764872 - 771109	ALAS1	NW_004973518.1:701596-708382
MSTRG.98656.3	NW_004973518.1 : 94952 - 96618	SPCS1	NW_004973518.1:6102-8090
MSTRG.98656.3	NW_004973518.1 : 94952 - 96618	NEK4	NW_004973518.1:29-5490
MSTRG.98656.3	NW_004973518.1 : 94952 - 96618	PBRM1	NW_004973518.1:28483-91402
MSTRG.99077.2	NW_004973518.1 : 2762325 - 2789233	FAM120A	NW_004973518.1:2706778-2755805
MSTRG.99077.2	NW_004973518.1 : 2762325 - 2789233	HRH1	NW_004973518.1:2680592-2698248
MSTRG.98656.3	NW_004973518.1 : 94952 - 96618	GNL3	NW_004973518.1:16456-26475
MSTRG.98656.3	NW_004973518.1 : 94952 - 96618	STAB1	NW_004973518.1:123358-184686
MSTRG.98418.1	NW_004973513.1 : 114775 - 137654	LOC102095407	NW_004973513.1:54272-107506
MSTRG.98418.1	NW_004973513.1 : 114775 - 137654	LOC102096265	NW_004973513.1:20606-50568
MSTRG.98418.1	NW_004973513.1 : 114775 - 137654	MFSD7	NW_004973513.1:164121-195108
MSTRG.98291.5	NW_004973510.1 : 1212516 - 1216181	DZANK1	NW_004973510.1:1287229-1313647
MSTRG.98291.5	NW_004973510.1 : 1212516 - 1216181	BIRC5	NW_004973510.1:1282559-1283997
MSTRG.98291.5	NW_004973510.1 : 1212516 - 1216181	KAT14	NW_004973510.1:1260221-1279408
MSTRG.98291.5	NW_004973510.1 : 1212516 - 1216181	OVOL2	NW_004973510.1:1231610-1248344
MSTRG.98291.5	NW_004973510.1 : 1212516 - 1216181	MGME1	NW_004973510.1:1217420-1227032
MSTRG.97954.1	NW_004973507.1 : 1009600 - 1162694	LOC110363497	NW_004973507.1:951745-959473
MSTRG.97852.1	NW_004973505.1 : 17103 - 19387	PAK4	NW_004973505.1:9374-13575
MSTRG.97803.1	NW_004973503.1 : 839298 - 840353	NFYB	NW_004973503.1:891007-910086
MSTRG.97803.1	NW_004973503.1 : 839298 - 840353	HCFC2	NW_004973503.1:864060-882769
MSTRG.97766.2	NW_004973503.1 : 762140 - 763371	GLT8D2	NW_004973503.1:845025-860889
MSTRG.97803.1	NW_004973503.1 : 839298 - 840353	GLT8D2	NW_004973503.1:845025-860889
MSTRG.97766.2	NW_004973503.1 : 762140 - 763371	MTPN	NW_004973503.1:707882-749952
MSTRG.97521.1	NW_004973502.1 : 68561 - 75371	DNAJB6	NW_004973502.1:4626-67987
MSTRG.96130.2	NW_004973497.1 : 3036032 - 3047557	UNC93A	NW_004973497.1:3063617-3089183
MSTRG.96130.2	NW_004973497.1 : 3036032 - 3047557	TTLL2	NW_004973497.1:3055638-3060398
MSTRG.96130.2	NW_004973497.1 : 3036032 - 3047557	CCR6	NW_004973497.1:3000165-3003330
MSTRG.96130.2	NW_004973497.1 : 3036032 - 3047557	FGFR1OP	NW_004973497.1:2941684-2968637
MSTRG.95662.1	NW_004973489.1 : 3324081 - 3325555	SMC3	NW_004973489.1:3272079-3300067
MSTRG.95662.1	NW_004973489.1 : 3324081 - 3325555	DUSP5	NW_004973489.1:3253696-3258285
MSTRG.94558.10	NW_004973488.1 : 739812 - 750852	TMEM114	NW_004973488.1:680066-699791
MSTRG.94558.4	NW_004973488.1 : 739122 - 930277	TMEM114	NW_004973488.1:680066-699791
MSTRG.94558.10	NW_004973488.1 : 739812 - 750852	METTL22	NW_004973488.1:661722-669959
MSTRG.94558.4	NW_004973488.1 : 739122 - 930277	METTL22	NW_004973488.1:661722-669959
MSTRG.94909.1	NW_004973488.1 : 3717341 - 3722937	CIITA	NW_004973488.1:3782481-3821631
MSTRG.94909.1	NW_004973488.1 : 3717341 - 3722937	TVP23A	NW_004973488.1:3766151-3776477
MSTRG.94909.1	NW_004973488.1 : 3717341 - 3722937	NUBP1	NW_004973488.1:3761002-3765557
MSTRG.94909.1	NW_004973488.1 : 3717341 - 3722937	TEKT5	NW_004973488.1:3732648-3757934
MSTRG.94909.1	NW_004973488.1 : 3717341 - 3722937	EMP2	NW_004973488.1:3657468-3664481
MSTRG.94304.29	NW_004973487.1 : 73606 - 78189	TEX10	NW_004973487.1:109482-167467
MSTRG.93537.11	NW_004973485.1 : 774136 - 804184	ATP2B1	NW_004973485.1:739080-774075
MSTRG.93537.11	NW_004973485.1 : 774136 - 804184	GALNT4	NW_004973485.1:715005-718754
MSTRG.93939.1	NW_004973485.1 : 2431992 - 2440818	CRADD	NW_004973485.1:2354020-2431815
MSTRG.93939.1	NW_004973485.1 : 2431992 - 2440818	SOCS2	NW_004973485.1:2340530-2342479
MSTRG.93756.4	NW_004973485.1 : 1688947 - 1696200	BTG1	NW_004973485.1:1783900-1785968
MSTRG.93757.3	NW_004973485.1 : 1700694 - 1704362	BTG1	NW_004973485.1:1783900-1785968
MSTRG.93772.8	NW_004973485.1 : 1844494 - 1905999	BTG1	NW_004973485.1:1783900-1785968
MSTRG.93008.10	NW_004973484.1 : 455405 - 473952	SCN4A	NW_004973484.1:513181-557622
MSTRG.93008.10	NW_004973484.1 : 455405 - 473952	CD79B	NW_004973484.1:505624-510068
MSTRG.92989.26	NW_004973484.1 : 393712 - 396669	LOC102083987	NW_004973484.1:446672-465281
MSTRG.92989.44	NW_004973484.1 : 393712 - 396669	LOC102083987	NW_004973484.1:446672-465281
MSTRG.92989.46	NW_004973484.1 : 393712 - 396669	LOC102083987	NW_004973484.1:446672-465281
MSTRG.92989.26	NW_004973484.1 : 393712 - 396669	LOC102083804	NW_004973484.1:434149-446020
MSTRG.92989.44	NW_004973484.1 : 393712 - 396669	LOC102083804	NW_004973484.1:434149-446020
MSTRG.92989.46	NW_004973484.1 : 393712 - 396669	LOC102083804	NW_004973484.1:434149-446020
MSTRG.93008.10	NW_004973484.1 : 455405 - 473952	LOC102083804	NW_004973484.1:434149-446020
MSTRG.92989.26	NW_004973484.1 : 393712 - 396669	TMEM98	NW_004973484.1:428947-431339
MSTRG.92989.44	NW_004973484.1 : 393712 - 396669	TMEM98	NW_004973484.1:428947-431339
MSTRG.92989.46	NW_004973484.1 : 393712 - 396669	TMEM98	NW_004973484.1:428947-431339
MSTRG.93008.10	NW_004973484.1 : 455405 - 473952	TMEM98	NW_004973484.1:428947-431339
MSTRG.92989.26	NW_004973484.1 : 393712 - 396669	GRN	NW_004973484.1:414495-423117
MSTRG.92989.44	NW_004973484.1 : 393712 - 396669	GRN	NW_004973484.1:414495-423117
MSTRG.92989.46	NW_004973484.1 : 393712 - 396669	GRN	NW_004973484.1:414495-423117
MSTRG.93008.10	NW_004973484.1 : 455405 - 473952	GRN	NW_004973484.1:414495-423117
MSTRG.92989.26	NW_004973484.1 : 393712 - 396669	LOC102098907	NW_004973484.1:413360-414325
MSTRG.92989.44	NW_004973484.1 : 393712 - 396669	LOC102098907	NW_004973484.1:413360-414325
MSTRG.92989.46	NW_004973484.1 : 393712 - 396669	LOC102098907	NW_004973484.1:413360-414325
MSTRG.93008.10	NW_004973484.1 : 455405 - 473952	LOC102098907	NW_004973484.1:413360-414325
MSTRG.92989.26	NW_004973484.1 : 393712 - 396669	ITGA2B	NW_004973484.1:404663-407998
MSTRG.92989.44	NW_004973484.1 : 393712 - 396669	ITGA2B	NW_004973484.1:404663-407998
MSTRG.92989.46	NW_004973484.1 : 393712 - 396669	ITGA2B	NW_004973484.1:404663-407998
MSTRG.93008.10	NW_004973484.1 : 455405 - 473952	ITGA2B	NW_004973484.1:404663-407998
MSTRG.93008.10	NW_004973484.1 : 455405 - 473952	GPATCH8	NW_004973484.1:361575-395204
MSTRG.92989.26	NW_004973484.1 : 393712 - 396669	FZD2	NW_004973484.1:333145-335053
MSTRG.92989.44	NW_004973484.1 : 393712 - 396669	FZD2	NW_004973484.1:333145-335053
MSTRG.92989.46	NW_004973484.1 : 393712 - 396669	FZD2	NW_004973484.1:333145-335053
MSTRG.92989.26	NW_004973484.1 : 393712 - 396669	PSMD11	NW_004973484.1:301892-319572
MSTRG.92989.44	NW_004973484.1 : 393712 - 396669	PSMD11	NW_004973484.1:301892-319572
MSTRG.92989.46	NW_004973484.1 : 393712 - 396669	PSMD11	NW_004973484.1:301892-319572
MSTRG.92989.26	NW_004973484.1 : 393712 - 396669	CDK5R1	NW_004973484.1:297490-300336
MSTRG.92989.44	NW_004973484.1 : 393712 - 396669	CDK5R1	NW_004973484.1:297490-300336
MSTRG.92989.46	NW_004973484.1 : 393712 - 396669	CDK5R1	NW_004973484.1:297490-300336
MSTRG.93134.1	NW_004973484.1 : 1390867 - 1393661	CALCOCO2	NW_004973484.1:1454677-1459824
MSTRG.93134.1	NW_004973484.1 : 1390867 - 1393661	ATP5G1	NW_004973484.1:1450163-1451923
MSTRG.93134.1	NW_004973484.1 : 1390867 - 1393661	UBE2Z	NW_004973484.1:1441168-1447793
MSTRG.93134.1	NW_004973484.1 : 1390867 - 1393661	SNF8	NW_004973484.1:1436368-1439000
MSTRG.93134.1	NW_004973484.1 : 1390867 - 1393661	GIP	NW_004973484.1:1430845-1435491
MSTRG.93134.1	NW_004973484.1 : 1390867 - 1393661	IGF2BP1	NW_004973484.1:1400707-1420977
MSTRG.93134.1	NW_004973484.1 : 1390867 - 1393661	LOC110363156	NW_004973484.1:1395065-1398265
MSTRG.93134.1	NW_004973484.1 : 1390867 - 1393661	ABI3	NW_004973484.1:1386100-1389785
MSTRG.93134.1	NW_004973484.1 : 1390867 - 1393661	PHOSPHO1	NW_004973484.1:1376550-1385266
MSTRG.93134.1	NW_004973484.1 : 1390867 - 1393661	ZNF652	NW_004973484.1:1366280-1374892
MSTRG.93134.1	NW_004973484.1 : 1390867 - 1393661	PHB	NW_004973484.1:1343447-1347017
MSTRG.93134.1	NW_004973484.1 : 1390867 - 1393661	NGFR	NW_004973484.1:1321835-1327857
MSTRG.93134.1	NW_004973484.1 : 1390867 - 1393661	NXPH3	NW_004973484.1:1294356-1295946
MSTRG.92813.1	NW_004973483.1 : 1860031 - 1870225	FAM160B1	NW_004973483.1:1928210-1962491
MSTRG.92813.3	NW_004973483.1 : 1864012 - 1864850	FAM160B1	NW_004973483.1:1928210-1962491
MSTRG.92813.1	NW_004973483.1 : 1860031 - 1870225	TRUB1	NW_004973483.1:1870728-1900930
MSTRG.92813.3	NW_004973483.1 : 1864012 - 1864850	TRUB1	NW_004973483.1:1870728-1900930
MSTRG.92482.1	NW_004973480.1 : 74532 - 83513	LOC102095273	NW_004973480.1:7-23128
MSTRG.92482.1	NW_004973480.1 : 74532 - 83513	MKI67	NW_004973480.1:33784-55138
MSTRG.92221.8	NW_004973478.1 : 13622 - 20025	LOC102091089	NW_004973478.1:7-9404
MSTRG.92221.8	NW_004973478.1 : 13622 - 20025	FOXN2	NW_004973478.1:21424-41978
MSTRG.92183.4	NW_004973477.1 : 382308 - 386695	C1QL1	NW_004973477.1:479169-484858
MSTRG.92183.4	NW_004973477.1 : 382308 - 386695	KIF18B	NW_004973477.1:463147-475407
MSTRG.92183.4	NW_004973477.1 : 382308 - 386695	GFAP	NW_004973477.1:455728-460410
MSTRG.92183.4	NW_004973477.1 : 382308 - 386695	LOC102089198	NW_004973477.1:451950-453580
MSTRG.92183.4	NW_004973477.1 : 382308 - 386695	CCDC103	NW_004973477.1:445599-450050
MSTRG.92183.4	NW_004973477.1 : 382308 - 386695	EFTUD2	NW_004973477.1:418624-462705
MSTRG.92183.4	NW_004973477.1 : 382308 - 386695	GJC1	NW_004973477.1:390300-413736
MSTRG.92183.4	NW_004973477.1 : 382308 - 386695	ADAM11	NW_004973477.1:340803-355812
MSTRG.92183.4	NW_004973477.1 : 382308 - 386695	DBF4B	NW_004973477.1:322253-335999
MSTRG.92183.4	NW_004973477.1 : 382308 - 386695	CCDC43	NW_004973477.1:313844-319260
MSTRG.92183.4	NW_004973477.1 : 382308 - 386695	MEIOC	NW_004973477.1:298430-311620
MSTRG.91458.1	NW_004973470.1 : 93621 - 94440	LOC102091636	NW_004973470.1:6-28738
MSTRG.91458.1	NW_004973470.1 : 93621 - 94440	FBP1	NW_004973470.1:59109-69211
MSTRG.91458.1	NW_004973470.1 : 93621 - 94440	DAPK1	NW_004973470.1:142085-190497
MSTRG.91458.1	NW_004973470.1 : 93621 - 94440	CTSL	NW_004973470.1:107241-112275
MSTRG.91046.28	NW_004973468.1 : 207300 - 232504	KPNA2	NW_004973468.1:245912-250660
MSTRG.91046.31	NW_004973468.1 : 209708 - 232536	KPNA2	NW_004973468.1:245912-250660
MSTRG.91046.28	NW_004973468.1 : 207300 - 232504	SMURF2	NW_004973468.1:178892-205865
MSTRG.91046.31	NW_004973468.1 : 209708 - 232536	SMURF2	NW_004973468.1:178892-205865
MSTRG.91046.28	NW_004973468.1 : 207300 - 232504	CEP95	NW_004973468.1:160227-176476
MSTRG.91046.31	NW_004973468.1 : 209708 - 232536	CEP95	NW_004973468.1:160227-176476
MSTRG.91046.28	NW_004973468.1 : 207300 - 232504	DDX5	NW_004973468.1:150009-155578
MSTRG.91046.31	NW_004973468.1 : 209708 - 232536	DDX5	NW_004973468.1:150009-155578
MSTRG.91046.28	NW_004973468.1 : 207300 - 232504	POLG2	NW_004973468.1:142799-146712
MSTRG.91046.31	NW_004973468.1 : 209708 - 232536	POLG2	NW_004973468.1:142799-146712
MSTRG.91046.28	NW_004973468.1 : 207300 - 232504	MILR1	NW_004973468.1:136774-139239
MSTRG.91046.31	NW_004973468.1 : 209708 - 232536	MILR1	NW_004973468.1:136774-139239
MSTRG.90973.51	NW_004973467.1 : 1234971 - 1243810	PLEKHM2	NW_004973467.1:1261258-1272709
MSTRG.90973.51	NW_004973467.1 : 1234971 - 1243810	SLC25A34	NW_004973467.1:1257706-1261314
MSTRG.90973.51	NW_004973467.1 : 1234971 - 1243810	TMEM82	NW_004973467.1:1252973-1256811
MSTRG.90973.51	NW_004973467.1 : 1234971 - 1243810	FBLIM1	NW_004973467.1:1247307-1251929
MSTRG.90973.51	NW_004973467.1 : 1234971 - 1243810	SPEN	NW_004973467.1:1168339-1216253
MSTRG.90973.51	NW_004973467.1 : 1234971 - 1243810	ZBTB17	NW_004973467.1:1150854-1160637
MSTRG.90973.51	NW_004973467.1 : 1234971 - 1243810	HSPB7	NW_004973467.1:1146463-1147658
MSTRG.90973.51	NW_004973467.1 : 1234971 - 1243810	LOC102097414	NW_004973467.1:1140691-1146120
MSTRG.90680.3	NW_004973465.1 : 204716 - 208717	STAM	NW_004973465.1:215672-238437
MSTRG.90680.3	NW_004973465.1 : 204716 - 208717	HACD1	NW_004973465.1:181607-204044
MSTRG.89989.31	NW_004973462.1 : 306342 - 357766	DIP2B	NW_004973462.1:387133-448549
MSTRG.89989.31	NW_004973462.1 : 306342 - 357766	ATF1	NW_004973462.1:368035-379571
MSTRG.89989.31	NW_004973462.1 : 306342 - 357766	TMPRSS12	NW_004973462.1:360275-365550
MSTRG.89989.31	NW_004973462.1 : 306342 - 357766	FIGNL2	NW_004973462.1:279342-281473
MSTRG.89989.31	NW_004973462.1 : 306342 - 357766	ANKRD33	NW_004973462.1:235066-237837
MSTRG.89989.31	NW_004973462.1 : 306342 - 357766	ACVRL1	NW_004973462.1:220737-230140
MSTRG.89495.2	NW_004973458.1 : 218099 - 220364	LOC102097290	NW_004973458.1:281691-314681
MSTRG.89495.2	NW_004973458.1 : 218099 - 220364	LOC102098357	NW_004973458.1:263699-266055
MSTRG.89495.2	NW_004973458.1 : 218099 - 220364	LOC102097102	NW_004973458.1:253376-275576
MSTRG.89495.2	NW_004973458.1 : 218099 - 220364	POLDIP3	NW_004973458.1:235839-253258
MSTRG.89495.2	NW_004973458.1 : 218099 - 220364	RRP7A	NW_004973458.1:231166-234930
MSTRG.89495.2	NW_004973458.1 : 218099 - 220364	SERHL2	NW_004973458.1:220747-230624
MSTRG.89495.2	NW_004973458.1 : 218099 - 220364	LOC102096439	NW_004973458.1:192070-208075
MSTRG.89495.2	NW_004973458.1 : 218099 - 220364	NFAM1	NW_004973458.1:160540-177180
MSTRG.88894.4	NW_004973454.1 : 1472204 - 1474309	ARGLU1	NW_004973454.1:1517141-1521990
MSTRG.87119.1	NW_004973449.1 : 1097778 - 1098682	TCP11L2	NW_004973449.1:1178747-1192671
MSTRG.86189.5	NW_004973446.1 : 23467 - 25568	GATA2	NW_004973446.1:90568-101420
MSTRG.86190.2	NW_004973446.1 : 23935 - 35862	GATA2	NW_004973446.1:90568-101420
MSTRG.86190.3	NW_004973446.1 : 31705 - 34493	GATA2	NW_004973446.1:90568-101420
MSTRG.86315.3	NW_004973446.1 : 569705 - 575080	MCM2	NW_004973446.1:654027-667727
MSTRG.86315.3	NW_004973446.1 : 569705 - 575080	PODXL2	NW_004973446.1:612072-643457
MSTRG.86315.3	NW_004973446.1 : 569705 - 575080	ABTB1	NW_004973446.1:585515-609402
MSTRG.86189.5	NW_004973446.1 : 23467 - 25568	LOC110362683	NW_004973446.1:53809-63725
MSTRG.86190.2	NW_004973446.1 : 23935 - 35862	LOC110362683	NW_004973446.1:53809-63725
MSTRG.86190.3	NW_004973446.1 : 31705 - 34493	LOC110362683	NW_004973446.1:53809-63725
MSTRG.86315.3	NW_004973446.1 : 569705 - 575080	KBTBD12	NW_004973446.1:470877-510427
MSTRG.86189.5	NW_004973446.1 : 23467 - 25568	RAB7A	NW_004973446.1:3889-23382
MSTRG.86190.2	NW_004973446.1 : 23935 - 35862	RAB7A	NW_004973446.1:3889-23382
MSTRG.86190.3	NW_004973446.1 : 31705 - 34493	RAB7A	NW_004973446.1:3889-23382
MSTRG.86189.5	NW_004973446.1 : 23467 - 25568	RPN1	NW_004973446.1:34290-42523
MSTRG.86284.1	NW_004973446.1 : 310642 - 314497	LOC110362657	NW_004973446.1:260016-284299
MSTRG.86451.6	NW_004973446.1 : 1384708 - 1408272	LOC110362672	NW_004973446.1:1455288-1459195
MSTRG.86451.6	NW_004973446.1 : 1384708 - 1408272	CHST13	NW_004973446.1:1412899-1455312
MSTRG.86451.6	NW_004973446.1 : 1384708 - 1408272	TXNRD3	NW_004973446.1:1325910-1367221
MSTRG.85910.2	NW_004973440.1 : 47159 - 47873	NRBP1	NW_004973440.1:88507-107906
MSTRG.85910.4	NW_004973440.1 : 47195 - 47873	NRBP1	NW_004973440.1:88507-107906
MSTRG.85910.2	NW_004973440.1 : 47159 - 47873	PPM1G	NW_004973440.1:54275-72496
MSTRG.85910.4	NW_004973440.1 : 47195 - 47873	PPM1G	NW_004973440.1:54275-72496
MSTRG.85910.2	NW_004973440.1 : 47159 - 47873	AGBL5	NW_004973440.1:5-12481
MSTRG.85910.4	NW_004973440.1 : 47195 - 47873	AGBL5	NW_004973440.1:5-12481
MSTRG.85910.2	NW_004973440.1 : 47159 - 47873	EIF2B4	NW_004973440.1:32985-38421
MSTRG.85910.4	NW_004973440.1 : 47195 - 47873	EIF2B4	NW_004973440.1:32985-38421
MSTRG.85910.2	NW_004973440.1 : 47159 - 47873	TMEM214	NW_004973440.1:19175-24870
MSTRG.85910.4	NW_004973440.1 : 47195 - 47873	TMEM214	NW_004973440.1:19175-24870
MSTRG.84601.26	NW_004973436.1 : 93412 - 94312	PGAP2	NW_004973436.1:99082-121697
MSTRG.84605.38	NW_004973436.1 : 148800 - 162048	PGAP2	NW_004973436.1:99082-121697
MSTRG.84605.38	NW_004973436.1 : 148800 - 162048	NUP98	NW_004973436.1:51785-94228
MSTRG.84610.1	NW_004973436.1 : 108334 - 167713	NUP98	NW_004973436.1:51785-94228
MSTRG.84612.1	NW_004973436.1 : 113106 - 161245	NUP98	NW_004973436.1:51785-94228
MSTRG.84601.26	NW_004973436.1 : 93412 - 94312	CHRNA10	NW_004973436.1:46845-48649
MSTRG.84605.1	NW_004973436.1 : 74045 - 222251	CHRNA10	NW_004973436.1:46845-48649
MSTRG.84610.1	NW_004973436.1 : 108334 - 167713	CHRNA10	NW_004973436.1:46845-48649
MSTRG.84612.1	NW_004973436.1 : 113106 - 161245	CHRNA10	NW_004973436.1:46845-48649
MSTRG.84601.26	NW_004973436.1 : 93412 - 94312	LOC102091384	NW_004973436.1:4633-14578
MSTRG.84605.1	NW_004973436.1 : 74045 - 222251	LOC102091384	NW_004973436.1:4633-14578
MSTRG.84601.26	NW_004973436.1 : 93412 - 94312	LOC110362535	NW_004973436.1:38648-44816
MSTRG.84605.1	NW_004973436.1 : 74045 - 222251	LOC110362535	NW_004973436.1:38648-44816
MSTRG.84610.1	NW_004973436.1 : 108334 - 167713	LOC110362535	NW_004973436.1:38648-44816
MSTRG.84612.1	NW_004973436.1 : 113106 - 161245	LOC110362535	NW_004973436.1:38648-44816
MSTRG.84605.1	NW_004973436.1 : 74045 - 222251	LOC102092847	NW_004973436.1:314057-320730
MSTRG.84605.1	NW_004973436.1 : 74045 - 222251	LOC102089504	NW_004973436.1:298088-299259
MSTRG.84605.1	NW_004973436.1 : 74045 - 222251	RRM1	NW_004973436.1:258247-278425
MSTRG.84601.26	NW_004973436.1 : 93412 - 94312	LOC106145647	NW_004973436.1:24438-28996
MSTRG.84605.1	NW_004973436.1 : 74045 - 222251	LOC106145647	NW_004973436.1:24438-28996
MSTRG.84610.1	NW_004973436.1 : 108334 - 167713	LOC106145647	NW_004973436.1:24438-28996
MSTRG.84612.1	NW_004973436.1 : 113106 - 161245	LOC106145647	NW_004973436.1:24438-28996
MSTRG.84605.1	NW_004973436.1 : 74045 - 222251	LOC102092298	NW_004973436.1:231391-251311
MSTRG.84605.38	NW_004973436.1 : 148800 - 162048	LOC102092298	NW_004973436.1:231391-251311
MSTRG.84610.1	NW_004973436.1 : 108334 - 167713	LOC102092298	NW_004973436.1:231391-251311
MSTRG.84612.1	NW_004973436.1 : 113106 - 161245	LOC102092298	NW_004973436.1:231391-251311
MSTRG.84605.38	NW_004973436.1 : 148800 - 162048	STIM1	NW_004973436.1:170931-220191
MSTRG.84610.1	NW_004973436.1 : 108334 - 167713	STIM1	NW_004973436.1:170931-220191
MSTRG.84612.1	NW_004973436.1 : 113106 - 161245	STIM1	NW_004973436.1:170931-220191
MSTRG.84601.26	NW_004973436.1 : 93412 - 94312	RHOG	NW_004973436.1:122202-127306
MSTRG.84605.38	NW_004973436.1 : 148800 - 162048	RHOG	NW_004973436.1:122202-127306
MSTRG.84442.19	NW_004973434.1 : 38502 - 58250	SRP9	NW_004973434.1:96583-102391
MSTRG.84442.26	NW_004973434.1 : 41608 - 58232	SRP9	NW_004973434.1:96583-102391
MSTRG.84519.24	NW_004973434.1 : 514646 - 517739	ITPKB	NW_004973434.1:530442-599629
MSTRG.84442.19	NW_004973434.1 : 38502 - 58250	EPHX1	NW_004973434.1:110545-133518
MSTRG.84442.26	NW_004973434.1 : 41608 - 58232	EPHX1	NW_004973434.1:110545-133518
MSTRG.84291.1	NW_004973431.1 : 924393 - 941993	PAPOLG	NW_004973431.1:860399-878290
MSTRG.84049.1	NW_004973431.1 : 167146 - 168155	BMP2	NW_004973431.1:231594-235228
MSTRG.84053.1	NW_004973431.1 : 174428 - 179890	BMP2	NW_004973431.1:231594-235228
MSTRG.83014.11	NW_004973428.1 : 99097 - 111465	EIF3E	NW_004973428.1:70755-98891
MSTRG.83076.1	NW_004973428.1 : 482811 - 485711	SYBU	NW_004973428.1:518201-556566
MSTRG.83076.1	NW_004973428.1 : 482811 - 485711	EBAG9	NW_004973428.1:495473-509950
MSTRG.83076.1	NW_004973428.1 : 482811 - 485711	ENY2	NW_004973428.1:477463-482563
MSTRG.83076.1	NW_004973428.1 : 482811 - 485711	NUDCD1	NW_004973428.1:435363-471731
MSTRG.83353.2	NW_004973428.1 : 3781007 - 3781788	RAD21	NW_004973428.1:3807490-3823921
MSTRG.83353.2	NW_004973428.1 : 3781007 - 3781788	UTP23	NW_004973428.1:3776772-3780809
MSTRG.82949.27	NW_004973427.1 : 1012925 - 1014722	ZNHIT6	NW_004973427.1:936322-968590
MSTRG.82949.27	NW_004973427.1 : 1012925 - 1014722	CYR61	NW_004973427.1:925463-927760
MSTRG.82987.2	NW_004973427.1 : 1236421 - 1238819	LOC110362404	NW_004973427.1:1263541-1284181
MSTRG.82987.2	NW_004973427.1 : 1236421 - 1238819	SELENOF	NW_004973427.1:1197366-1223371
MSTRG.82987.2	NW_004973427.1 : 1236421 - 1238819	SH3GLB1	NW_004973427.1:1158874-1183710
MSTRG.82779.1	NW_004973426.1 : 194561 - 765668	SOX7	NW_004973426.1:95812-97369
MSTRG.82779.1	NW_004973426.1 : 194561 - 765668	LOC102093681	NW_004973426.1:817832-822806
MSTRG.82779.1	NW_004973426.1 : 194561 - 765668	GATA4	NW_004973426.1:784515-813084
MSTRG.82779.33	NW_004973426.1 : 355153 - 431147	LOC110362392	NW_004973426.1:491746-493205
MSTRG.82779.38	NW_004973426.1 : 365478 - 420436	LOC110362392	NW_004973426.1:491746-493205
MSTRG.82779.1	NW_004973426.1 : 194561 - 765668	PINX1	NW_004973426.1:107360-179950
MSTRG.82541.15	NW_004973425.1 : 738848 - 740382	LOC110362369	NW_004973425.1:838199-840032
MSTRG.82541.15	NW_004973425.1 : 738848 - 740382	LEKR1	NW_004973425.1:802025-838155
MSTRG.82541.15	NW_004973425.1 : 738848 - 740382	SSR3	NW_004973425.1:735650-738626
MSTRG.82541.15	NW_004973425.1 : 738848 - 740382	KCNAB1	NW_004973425.1:672110-733622
MSTRG.82509.2	NW_004973425.1 : 408195 - 468689	MME	NW_004973425.1:476134-506781
MSTRG.82509.2	NW_004973425.1 : 408195 - 468689	GPR149	NW_004973425.1:386785-401477
MSTRG.82509.2	NW_004973425.1 : 408195 - 468689	DHX36	NW_004973425.1:363929-383586
MSTRG.82509.2	NW_004973425.1 : 408195 - 468689	ARHGEF26	NW_004973425.1:322985-359959
MSTRG.82702.39	NW_004973425.1 : 1776670 - 1795439	LOC102088063	NW_004973425.1:1855390-1863874
MSTRG.82702.39	NW_004973425.1 : 1776670 - 1795439	OTOL1	NW_004973425.1:1842849-1887059
MSTRG.82702.39	NW_004973425.1 : 1776670 - 1795439	NMD3	NW_004973425.1:1833978-1843280
MSTRG.82702.39	NW_004973425.1 : 1776670 - 1795439	LOC102091566	NW_004973425.1:1830863-1832303
MSTRG.82702.39	NW_004973425.1 : 1776670 - 1795439	LOC106145798	NW_004973425.1:1820898-1826465
MSTRG.82702.39	NW_004973425.1 : 1776670 - 1795439	B3GALNT1	NW_004973425.1:1708377-1709905
MSTRG.82702.39	NW_004973425.1 : 1776670 - 1795439	ARL14	NW_004973425.1:1699531-1701800
MSTRG.82450.3	NW_004973425.1 : 203285 - 226295	P2RY1	NW_004973425.1:153478-155328
MSTRG.82615.2	NW_004973425.1 : 1205535 - 1219338	LOC102090667	NW_004973425.1:1270555-1276993
MSTRG.82615.2	NW_004973425.1 : 1205535 - 1219338	LXN	NW_004973425.1:1257428-1262981
MSTRG.82615.2	NW_004973425.1 : 1205535 - 1219338	GFM1	NW_004973425.1:1247115-1268745
MSTRG.82615.2	NW_004973425.1 : 1205535 - 1219338	MLF1	NW_004973425.1:1235015-1245655
MSTRG.82272.3	NW_004973424.1 : 1238857 - 1251302	KCNV2	NW_004973424.1:1311724-1317686
MSTRG.82272.3	NW_004973424.1 : 1238857 - 1251302	VLDLR	NW_004973424.1:1251906-1267847
MSTRG.81672.1	NW_004973422.1 : 1383520 - 1390508	CLEC3A	NW_004973422.1:1297971-1305146
MSTRG.80997.1	NW_004973421.1 : 403720 - 429051	KCNJ8	NW_004973421.1:457023-464683
MSTRG.80997.1	NW_004973421.1 : 403720 - 429051	CMAS	NW_004973421.1:334489-345559
MSTRG.80997.1	NW_004973421.1 : 403720 - 429051	LOC102085758	NW_004973421.1:314839-326971
MSTRG.81292.4	NW_004973421.1 : 1965564 - 2011618	ARFGAP3	NW_004973421.1:2074336-2103704
MSTRG.81292.4	NW_004973421.1 : 1965564 - 2011618	LOC102098963	NW_004973421.1:2027165-2028367
MSTRG.81292.4	NW_004973421.1 : 1965564 - 2011618	LOC102083490	NW_004973421.1:2015500-2019555
MSTRG.81292.4	NW_004973421.1 : 1965564 - 2011618	LOC110362271	NW_004973421.1:1959093-1961240
MSTRG.81292.4	NW_004973421.1 : 1965564 - 2011618	LOC102098778	NW_004973421.1:1945415-1950750
MSTRG.81292.4	NW_004973421.1 : 1965564 - 2011618	LOC102086668	NW_004973421.1:1915054-1933574
MSTRG.81292.4	NW_004973421.1 : 1965564 - 2011618	REP15	NW_004973421.1:1909551-1914757
MSTRG.80614.1	NW_004973420.1 : 1059518 - 1061830	ZNF518A	NW_004973420.1:972151-981375
MSTRG.80736.1	NW_004973420.1 : 2210584 - 2212669	LOC110362220	NW_004973420.1:2204420-2205661
MSTRG.80736.1	NW_004973420.1 : 2210584 - 2212669	CNNM1	NW_004973420.1:2173325-2192458
MSTRG.80736.1	NW_004973420.1 : 2210584 - 2212669	GOT1	NW_004973420.1:2167752-2171662
MSTRG.80736.1	NW_004973420.1 : 2210584 - 2212669	SLC25A28	NW_004973420.1:2127362-2130900
MSTRG.80736.1	NW_004973420.1 : 2210584 - 2212669	ENTPD7	NW_004973420.1:2121247-2126098
MSTRG.80736.1	NW_004973420.1 : 2210584 - 2212669	LOC102096554	NW_004973420.1:2118831-2120620
MSTRG.80736.1	NW_004973420.1 : 2210584 - 2212669	LOC102096376	NW_004973420.1:2115022-2118625
MSTRG.80113.1	NW_004973417.1 : 16935 - 20105	RSL1D1	NW_004973417.1:98910-104583
MSTRG.80113.1	NW_004973417.1 : 16935 - 20105	RRN3	NW_004973417.1:71046-87227
MSTRG.80113.1	NW_004973417.1 : 16935 - 20105	NTAN1	NW_004973417.1:63698-69535
MSTRG.80113.1	NW_004973417.1 : 16935 - 20105	PDXDC1	NW_004973417.1:40045-63450
MSTRG.80113.1	NW_004973417.1 : 16935 - 20105	MPV17L	NW_004973417.1:26110-34146
MSTRG.80043.1	NW_004973415.1 : 406923 - 409480	LOC102085330	NW_004973415.1:426873-485833
MSTRG.77850.13	NW_004973413.1 : 5110957 - 5135647	OGFRL1	NW_004973413.1:5158879-5174023
MSTRG.77850.13	NW_004973413.1 : 5110957 - 5135647	ASRGL1	NW_004973413.1:5054157-5075354
MSTRG.79718.1	NW_004973413.1 : 23672278 - 23674287	FAM49A	NW_004973413.1:23616407-23671508
MSTRG.78678.1	NW_004973413.1 : 15010652 - 15012008	FBXO25	NW_004973413.1:15064264-15094061
MSTRG.78678.1	NW_004973413.1 : 15010652 - 15012008	TDRP	NW_004973413.1:15051483-15060929
MSTRG.78678.1	NW_004973413.1 : 15010652 - 15012008	LOC110361972	NW_004973413.1:14971017-14985499
MSTRG.76805.15	NW_004973411.1 : 597638 - 617647	PRPF4B	NW_004973411.1:571482-596734
MSTRG.76805.15	NW_004973411.1 : 597638 - 617647	ECI2	NW_004973411.1:515624-558279
MSTRG.77098.1	NW_004973411.1 : 2335544 - 2338162	SERPINB1	NW_004973411.1:2398966-2400694
MSTRG.77098.1	NW_004973411.1 : 2335544 - 2338162	WRNIP1	NW_004973411.1:2361521-2389393
MSTRG.77087.1	NW_004973411.1 : 2276960 - 2280242	LOC110361904	NW_004973411.1:2355314-2371622
MSTRG.77098.1	NW_004973411.1 : 2335544 - 2338162	LOC110361904	NW_004973411.1:2355314-2371622
MSTRG.77087.1	NW_004973411.1 : 2276960 - 2280242	MYLK4	NW_004973411.1:2282257-2316095
MSTRG.77098.1	NW_004973411.1 : 2335544 - 2338162	MYLK4	NW_004973411.1:2282257-2316095
MSTRG.76933.11	NW_004973411.1 : 1489386 - 1541438	FOXF2	NW_004973411.1:1603668-1613507
MSTRG.76292.11	NW_004973408.1 : 149847 - 154088	LOC110361849	NW_004973408.1:136662-149715
MSTRG.75592.3	NW_004973404.1 : 2146935 - 2176532	SOX2	NW_004973404.1:2138822-2141771
MSTRG.74084.27	NW_004973399.1 : 104390 - 106119	MCMDC2	NW_004973399.1:162904-179215
MSTRG.74084.27	NW_004973399.1 : 104390 - 106119	TCF24	NW_004973399.1:159460-162214
MSTRG.74084.27	NW_004973399.1 : 104390 - 106119	PPP1R42	NW_004973399.1:129494-151730
MSTRG.74084.27	NW_004973399.1 : 104390 - 106119	COPS5	NW_004973399.1:111340-120265
MSTRG.74004.3	NW_004973398.1 : 174630 - 189892	SGPL1	NW_004973398.1:88219-129502
MSTRG.74069.8	NW_004973398.1 : 759565 - 770111	LOC102091202	NW_004973398.1:698946-726063
MSTRG.74069.8	NW_004973398.1 : 759565 - 770111	AIFM2	NW_004973398.1:689746-698574
MSTRG.74069.8	NW_004973398.1 : 759565 - 770111	CHST3	NW_004973398.1:684556-687839
MSTRG.74004.3	NW_004973398.1 : 174630 - 189892	PCBD1	NW_004973398.1:132719-136931
MSTRG.73851.1	NW_004973397.1 : 817562 - 819254	ADRA1D	NW_004973397.1:863391-912776
MSTRG.73853.29	NW_004973397.1 : 936048 - 939970	ADRA1D	NW_004973397.1:863391-912776
MSTRG.73855.1	NW_004973397.1 : 926175 - 950043	ADRA1D	NW_004973397.1:863391-912776
MSTRG.73863.1	NW_004973397.1 : 1129763 - 1158950	PANK2	NW_004973397.1:1110862-1123320
MSTRG.73863.1	NW_004973397.1 : 1129763 - 1158950	RNF24	NW_004973397.1:1078191-1106216
MSTRG.73351.1	NW_004973393.1 : 478203 - 485325	DACT1	NW_004973393.1:543921-556311
MSTRG.73351.1	NW_004973393.1 : 478203 - 485325	TIMM9	NW_004973393.1:413657-421600
MSTRG.73351.1	NW_004973393.1 : 478203 - 485325	LOC102094966	NW_004973393.1:407553-412705
MSTRG.73345.87	NW_004973393.1 : 1429287 - 1483239	TRMT5	NW_004973393.1:1556705-1564943
MSTRG.73345.87	NW_004973393.1 : 1429287 - 1483239	SIX4	NW_004973393.1:1413673-1425311
MSTRG.73345.87	NW_004973393.1 : 1429287 - 1483239	SIX1	NW_004973393.1:1389700-1392189
MSTRG.72694.22	NW_004973390.1 : 88667 - 90788	USF3	NW_004973390.1:95672-128719
MSTRG.72694.22	NW_004973390.1 : 88667 - 90788	DUSP12	NW_004973390.1:184123-189962
MSTRG.72694.22	NW_004973390.1 : 88667 - 90788	ATP6V1A	NW_004973390.1:155338-183666
MSTRG.72694.22	NW_004973390.1 : 88667 - 90788	NAA50	NW_004973390.1:132836-149938
MSTRG.72694.22	NW_004973390.1 : 88667 - 90788	SPICE1	NW_004973390.1:10894-37845
MSTRG.71250.3	NW_004973385.1 : 6867572 - 6924888	LOC102091381	NW_004973385.1:7016251-7024802
MSTRG.71250.3	NW_004973385.1 : 6867572 - 6924888	LOC102091201	NW_004973385.1:6998440-7003954
MSTRG.71250.3	NW_004973385.1 : 6867572 - 6924888	LOC102091027	NW_004973385.1:6978473-6986328
MSTRG.71250.3	NW_004973385.1 : 6867572 - 6924888	LOC102088134	NW_004973385.1:6955067-6966698
MSTRG.71250.3	NW_004973385.1 : 6867572 - 6924888	GSC	NW_004973385.1:6857660-6861132
MSTRG.70704.1	NW_004973385.1 : 3036961 - 3042094	DIO3	NW_004973385.1:2942116-2943454
MSTRG.71762.2	NW_004973385.1 : 11114751 - 11117538	FLRT2	NW_004973385.1:11129911-11188260
MSTRG.67640.11	NW_004973373.1 : 838288 - 845525	CLDN10	NW_004973373.1:738943-800721
MSTRG.67416.1	NW_004973372.1 : 872994 - 874268	CUNH2orf40	NW_004973372.1:876889-882840
MSTRG.67416.1	NW_004973372.1 : 872994 - 874268	UXS1	NW_004973372.1:802567-871214
MSTRG.66909.61	NW_004973370.1 : 564639 - 572911	LOC110361009	NW_004973370.1:664631-666982
MSTRG.66909.86	NW_004973370.1 : 596396 - 623937	LOC110361009	NW_004973370.1:664631-666982
MSTRG.66909.61	NW_004973370.1 : 564639 - 572911	NSMCE4A	NW_004973370.1:502743-515222
MSTRG.66909.86	NW_004973370.1 : 596396 - 623937	NSMCE4A	NW_004973370.1:502743-515222
MSTRG.67067.9	NW_004973370.1 : 1806879 - 1816036	ZRANB1	NW_004973370.1:1874684-1915062
MSTRG.67067.9	NW_004973370.1 : 1806879 - 1816036	ABRAXAS2	NW_004973370.1:1819292-1838055
MSTRG.67094.1	NW_004973370.1 : 1748538 - 1749512	ABRAXAS2	NW_004973370.1:1819292-1838055
MSTRG.67094.1	NW_004973370.1 : 1748538 - 1749512	EEF1AKMT2	NW_004973370.1:1807667-1817186
MSTRG.67067.9	NW_004973370.1 : 1806879 - 1816036	FAM53B	NW_004973370.1:1755446-1791761
MSTRG.67094.1	NW_004973370.1 : 1748538 - 1749512	FAM53B	NW_004973370.1:1755446-1791761
MSTRG.66211.18	NW_004973369.1 : 835323 - 836131	PPL	NW_004973369.1:858427-886516
MSTRG.66211.18	NW_004973369.1 : 835323 - 836131	NME3	NW_004973369.1:826721-830160
MSTRG.66211.18	NW_004973369.1 : 835323 - 836131	SPSB3	NW_004973369.1:817003-825314
MSTRG.66211.18	NW_004973369.1 : 835323 - 836131	NUBP2	NW_004973369.1:812520-816802
MSTRG.66211.18	NW_004973369.1 : 835323 - 836131	IGFALS	NW_004973369.1:806972-811113
MSTRG.66211.18	NW_004973369.1 : 835323 - 836131	CCDC78	NW_004973369.1:787406-803641
MSTRG.66211.18	NW_004973369.1 : 835323 - 836131	FAM173A	NW_004973369.1:777715-787507
MSTRG.66211.18	NW_004973369.1 : 835323 - 836131	FBXL16	NW_004973369.1:756639-770511
MSTRG.66211.18	NW_004973369.1 : 835323 - 836131	WDR24	NW_004973369.1:747796-754388
MSTRG.66211.18	NW_004973369.1 : 835323 - 836131	JMJD8	NW_004973369.1:745409-747813
MSTRG.66211.18	NW_004973369.1 : 835323 - 836131	STUB1	NW_004973369.1:741445-744510
MSTRG.66211.18	NW_004973369.1 : 835323 - 836131	RHBDL1	NW_004973369.1:735958-739736
MSTRG.66715.1	NW_004973369.1 : 3445086 - 3446424	RBBP6	NW_004973369.1:3479998-3502615
MSTRG.66715.1	NW_004973369.1 : 3445086 - 3446424	TNRC6A	NW_004973369.1:3401277-3444519
MSTRG.66715.1	NW_004973369.1 : 3445086 - 3446424	LOC102093932	NW_004973369.1:3396866-3400592
MSTRG.66715.1	NW_004973369.1 : 3445086 - 3446424	LOC110360966	NW_004973369.1:3394896-3396634
MSTRG.66715.1	NW_004973369.1 : 3445086 - 3446424	NDUFAB1	NW_004973369.1:3390133-3392687
MSTRG.66715.1	NW_004973369.1 : 3445086 - 3446424	PALB2	NW_004973369.1:3381116-3389490
MSTRG.66715.1	NW_004973369.1 : 3445086 - 3446424	DCTN5	NW_004973369.1:3376198-3381161
MSTRG.66715.1	NW_004973369.1 : 3445086 - 3446424	PLK1	NW_004973369.1:3369472-3375357
MSTRG.66715.1	NW_004973369.1 : 3445086 - 3446424	ERN2	NW_004973369.1:3361768-3368020
MSTRG.66715.1	NW_004973369.1 : 3445086 - 3446424	UBFD1	NW_004973369.1:3346751-3353887
MSTRG.66082.2	NW_004973369.1 : 88462 - 89644	TFAP4	NW_004973369.1:174449-180892
MSTRG.66082.2	NW_004973369.1 : 88462 - 89644	SRL	NW_004973369.1:148492-172071
MSTRG.66082.2	NW_004973369.1 : 88462 - 89644	LOC110360984	NW_004973369.1:1262-15301
MSTRG.65888.1	NW_004973368.1 : 115766 - 121706	FRMD4B	NW_004973368.1:21080-115443
MSTRG.65888.1	NW_004973368.1 : 115766 - 121706	EOGT	NW_004973368.1:181132-198375
MSTRG.65888.1	NW_004973368.1 : 115766 - 121706	TMF1	NW_004973368.1:162751-179659
MSTRG.65888.1	NW_004973368.1 : 115766 - 121706	UBA3	NW_004973368.1:145857-160275
MSTRG.65888.1	NW_004973368.1 : 115766 - 121706	ARL6IP5	NW_004973368.1:134184-144056
MSTRG.65610.10	NW_004973365.1 : 1739820 - 1742210	CEP78	NW_004973365.1:1686823-1713795
MSTRG.65610.10	NW_004973365.1 : 1739820 - 1742210	PSAT1	NW_004973365.1:1664856-1680393
MSTRG.65445.2	NW_004973364.1 : 58390 - 83882	SOCS5	NW_004973364.1:84468-88444
MSTRG.65308.1	NW_004973361.1 : 11424 - 12349	LOC110360912	NW_004973361.1:21048-23422
MSTRG.65308.1	NW_004973361.1 : 11424 - 12349	KPTN	NW_004973361.1:1147-7625
MSTRG.65156.30	NW_004973359.1 : 882455 - 923109	SLC35E1	NW_004973359.1:998367-1001687
MSTRG.65156.30	NW_004973359.1 : 882455 - 923109	MED26	NW_004973359.1:990917-995639
MSTRG.65156.30	NW_004973359.1 : 882455 - 923109	TMEM38A	NW_004973359.1:968123-972802
MSTRG.65156.30	NW_004973359.1 : 882455 - 923109	SIN3B	NW_004973359.1:948991-961809
MSTRG.65156.30	NW_004973359.1 : 882455 - 923109	F2RL3	NW_004973359.1:942496-945563
MSTRG.65156.30	NW_004973359.1 : 882455 - 923109	USE1	NW_004973359.1:842892-846302
MSTRG.65156.30	NW_004973359.1 : 882455 - 923109	INSR	NW_004973359.1:799564-833805
MSTRG.65156.30	NW_004973359.1 : 882455 - 923109	CUNH19orf44	NW_004973359.1:1014909-1019065
MSTRG.65156.30	NW_004973359.1 : 882455 - 923109	CHERP	NW_004973359.1:1005236-1014629
MSTRG.64695.5	NW_004973357.1 : 74153 - 91935	LOC102093129	NW_004973357.1:46296-60177
MSTRG.64695.5	NW_004973357.1 : 74153 - 91935	CDC16	NW_004973357.1:1616-24063
MSTRG.64620.1	NW_004973355.1 : 222590 - 225913	APOLD1	NW_004973355.1:307575-312654
MSTRG.64620.1	NW_004973355.1 : 222590 - 225913	DDX47	NW_004973355.1:295101-303084
MSTRG.64620.1	NW_004973355.1 : 222590 - 225913	LOC102089120	NW_004973355.1:269890-294234
MSTRG.64620.1	NW_004973355.1 : 222590 - 225913	HEBP1	NW_004973355.1:245354-251069
MSTRG.64620.1	NW_004973355.1 : 222590 - 225913	LOC102086159	NW_004973355.1:233355-245236
MSTRG.64620.1	NW_004973355.1 : 222590 - 225913	GSG1	NW_004973355.1:188966-203139
MSTRG.64620.1	NW_004973355.1 : 222590 - 225913	EMP1	NW_004973355.1:147733-162835
MSTRG.64218.2	NW_004973352.1 : 332537 - 360260	SPRED2	NW_004973352.1:409359-447932
MSTRG.64228.32	NW_004973352.1 : 448042 - 452731	SPRED2	NW_004973352.1:409359-447932
MSTRG.64218.2	NW_004973352.1 : 332537 - 360260	ACTR2	NW_004973352.1:367279-386333
MSTRG.64228.32	NW_004973352.1 : 448042 - 452731	ACTR2	NW_004973352.1:367279-386333
MSTRG.64218.2	NW_004973352.1 : 332537 - 360260	RAB1A	NW_004973352.1:317223-325899
MSTRG.64218.2	NW_004973352.1 : 332537 - 360260	CEP68	NW_004973352.1:304322-316221
MSTRG.64218.2	NW_004973352.1 : 332537 - 360260	SLC1A4	NW_004973352.1:259844-286516
MSTRG.63782.6	NW_004973350.1 : 80398 - 83208	MFSD4A	NW_004973350.1:84624-102522
MSTRG.63782.6	NW_004973350.1 : 80398 - 83208	ELK4	NW_004973350.1:57608-80010
MSTRG.63782.6	NW_004973350.1 : 80398 - 83208	LOC102087641	NW_004973350.1:49251-53059
MSTRG.63796.1	NW_004973350.1 : 190745 - 193954	TMCC2	NW_004973350.1:257586-280872
MSTRG.63796.1	NW_004973350.1 : 190745 - 193954	NUAK2	NW_004973350.1:241604-246840
MSTRG.63796.1	NW_004973350.1 : 190745 - 193954	KLHDC8A	NW_004973350.1:215488-226926
MSTRG.63796.1	NW_004973350.1 : 190745 - 193954	LOC110360797	NW_004973350.1:194967-213090
MSTRG.63782.6	NW_004973350.1 : 80398 - 83208	SLC45A3	NW_004973350.1:15428-42582
MSTRG.63975.1	NW_004973350.1 : 1255691 - 1311005	KLHL12	NW_004973350.1:1313381-1332956
MSTRG.63964.2	NW_004973350.1 : 1154686 - 1202343	LOC102086223	NW_004973350.1:1289309-1296027
MSTRG.63964.2	NW_004973350.1 : 1154686 - 1202343	KDM5B	NW_004973350.1:1216881-1272568
MSTRG.63975.1	NW_004973350.1 : 1255691 - 1311005	IPO9	NW_004973350.1:1176496-1204602
MSTRG.63964.2	NW_004973350.1 : 1154686 - 1202343	RNPEP	NW_004973350.1:1125121-1139740
MSTRG.63782.6	NW_004973350.1 : 80398 - 83208	CDK18	NW_004973350.1:108404-139346
MSTRG.63796.1	NW_004973350.1 : 190745 - 193954	CDK18	NW_004973350.1:108404-139346
MSTRG.63964.2	NW_004973350.1 : 1154686 - 1202343	NAV1	NW_004973350.1:1059406-1088967
MSTRG.63751.6	NW_004973349.1 : 4404554 - 4444166	CCDC102B	NW_004973349.1:4480479-4519220
MSTRG.63097.1	NW_004973347.1 : 2628424 - 2631193	NUDT13	NW_004973347.1:2716085-2724529
MSTRG.63097.1	NW_004973347.1 : 2628424 - 2631193	LOC110360731	NW_004973347.1:2705967-2708269
MSTRG.63097.1	NW_004973347.1 : 2628424 - 2631193	KNDC1	NW_004973347.1:2699146-2701478
MSTRG.63097.1	NW_004973347.1 : 2628424 - 2631193	ZNF511	NW_004973347.1:2691867-2696851
MSTRG.63097.1	NW_004973347.1 : 2628424 - 2631193	TUBGCP2	NW_004973347.1:2667070-2691283
MSTRG.63097.1	NW_004973347.1 : 2628424 - 2631193	ADAM8	NW_004973347.1:2650909-2664815
MSTRG.63097.1	NW_004973347.1 : 2628424 - 2631193	CWF19L1	NW_004973347.1:2588034-2599584
MSTRG.63097.1	NW_004973347.1 : 2628424 - 2631193	LOC110360734	NW_004973347.1:2580728-2582890
MSTRG.63097.1	NW_004973347.1 : 2628424 - 2631193	LOC110360730	NW_004973347.1:2572662-2586937
MSTRG.63097.1	NW_004973347.1 : 2628424 - 2631193	ECHS1	NW_004973347.1:2566865-2568286
MSTRG.63097.1	NW_004973347.1 : 2628424 - 2631193	MTG1	NW_004973347.1:2561989-2564549
MSTRG.63097.1	NW_004973347.1 : 2628424 - 2631193	PAOX	NW_004973347.1:2558388-2561282
MSTRG.63097.1	NW_004973347.1 : 2628424 - 2631193	LOC102094908	NW_004973347.1:2549646-2556391
MSTRG.63097.1	NW_004973347.1 : 2628424 - 2631193	LOC102083917	NW_004973347.1:2534375-2542424
MSTRG.62497.6	NW_004973343.1 : 124930 - 134374	LOC102086343	NW_004973343.1:196887-216474
MSTRG.62497.6	NW_004973343.1 : 124930 - 134374	NANOS1	NW_004973343.1:191205-191656
MSTRG.62144.6	NW_004973341.1 : 162954 - 178569	CCDC14	NW_004973341.1:114173-124238
MSTRG.61406.8	NW_004973337.1 : 3386661 - 3710423	TOMM5	NW_004973337.1:3792952-3794604
MSTRG.61406.8	NW_004973337.1 : 3386661 - 3710423	LOC110360573	NW_004973337.1:3788220-3789167
MSTRG.61406.8	NW_004973337.1 : 3386661 - 3710423	LOC102094662	NW_004973337.1:3761908-3776920
MSTRG.61406.8	NW_004973337.1 : 3386661 - 3710423	ARSK	NW_004973337.1:3360594-3383167
MSTRG.61406.8	NW_004973337.1 : 3386661 - 3710423	TTC37	NW_004973337.1:3309592-3359046
MSTRG.60345.1	NW_004973334.1 : 1012105 - 1014081	LOC102089494	NW_004973334.1:971097-986465
MSTRG.60345.1	NW_004973334.1 : 1012105 - 1014081	ASB4	NW_004973334.1:940237-961089
MSTRG.60345.1	NW_004973334.1 : 1012105 - 1014081	PDK4	NW_004973334.1:916259-925072
MSTRG.60208.2	NW_004973334.1 : 17694 - 23711	TAC1	NW_004973334.1:91273-98243
MSTRG.60208.2	NW_004973334.1 : 17694 - 23711	ASNS	NW_004973334.1:58055-75643
MSTRG.60250.4	NW_004973334.1 : 255586 - 258928	DLX6	NW_004973334.1:335279-338475
MSTRG.60250.4	NW_004973334.1 : 255586 - 258928	DLX5	NW_004973334.1:325428-328093
MSTRG.60208.2	NW_004973334.1 : 17694 - 23711	C1GALT1	NW_004973334.1:27702-41164
MSTRG.60250.4	NW_004973334.1 : 255586 - 258928	SDHAF3	NW_004973334.1:264658-301317
MSTRG.60208.2	NW_004973334.1 : 17694 - 23711	LOC102088057	NW_004973334.1:2073-13691
MSTRG.60396.2	NW_004973334.1 : 1314280 - 1319128	COL1A2	NW_004973334.1:1259382-1298559
MSTRG.59672.1	NW_004973333.1 : 8403610 - 8407502	MLYCD	NW_004973333.1:8383948-8403237
MSTRG.59672.1	NW_004973333.1 : 8403610 - 8407502	HSBP1	NW_004973333.1:8306817-8311109
MSTRG.59410.3	NW_004973333.1 : 5844843 - 5852107	SPG7	NW_004973333.1:5814371-5842969
MSTRG.59410.3	NW_004973333.1 : 5844843 - 5852107	RPL13	NW_004973333.1:5807736-5812340
MSTRG.59410.3	NW_004973333.1 : 5844843 - 5852107	CPNE7	NW_004973333.1:5798856-5806010
MSTRG.59410.3	NW_004973333.1 : 5844843 - 5852107	SULT2B1	NW_004973333.1:5795026-5797187
MSTRG.59410.3	NW_004973333.1 : 5844843 - 5852107	DPEP1	NW_004973333.1:5790195-5793823
MSTRG.59410.3	NW_004973333.1 : 5844843 - 5852107	CHMP1A	NW_004973333.1:5785508-5789149
MSTRG.59410.3	NW_004973333.1 : 5844843 - 5852107	CDK10	NW_004973333.1:5781283-5784257
MSTRG.59410.3	NW_004973333.1 : 5844843 - 5852107	SPATA2L	NW_004973333.1:5779530-5781040
MSTRG.59410.3	NW_004973333.1 : 5844843 - 5852107	VPS9D1	NW_004973333.1:5775353-5780179
MSTRG.59410.3	NW_004973333.1 : 5844843 - 5852107	ZNF276	NW_004973333.1:5767155-5773788
MSTRG.59297.1	NW_004973333.1 : 4844153 - 4845934	PMFBP1	NW_004973333.1:4802589-4807278
MSTRG.59297.1	NW_004973333.1 : 4844153 - 4845934	DHX38	NW_004973333.1:4792318-4802500
MSTRG.59297.1	NW_004973333.1 : 4844153 - 4845934	LOC102093742	NW_004973333.1:4788378-4790422
MSTRG.59297.1	NW_004973333.1 : 4844153 - 4845934	DHODH	NW_004973333.1:4783153-4786374
MSTRG.59297.1	NW_004973333.1 : 4844153 - 4845934	IST1	NW_004973333.1:4775071-4782277
MSTRG.59297.1	NW_004973333.1 : 4844153 - 4845934	ZNF821	NW_004973333.1:4760482-4772126
MSTRG.59297.1	NW_004973333.1 : 4844153 - 4845934	ATXN1L	NW_004973333.1:4751756-4757933
MSTRG.58524.23	NW_004973333.1 : 1395570 - 1410234	PAPD5	NW_004973333.1:1461407-1481911
MSTRG.58524.23	NW_004973333.1 : 1395570 - 1410234	HEATR3	NW_004973333.1:1415696-1439765
MSTRG.58534.1	NW_004973333.1 : 1353532 - 1358180	HEATR3	NW_004973333.1:1415696-1439765
MSTRG.58524.23	NW_004973333.1 : 1395570 - 1410234	CNEP1R1	NW_004973333.1:1412644-1417249
MSTRG.58534.1	NW_004973333.1 : 1353532 - 1358180	CNEP1R1	NW_004973333.1:1412644-1417249
MSTRG.58374.12	NW_004973332.1 : 87385 - 88676	DENND3	NW_004973332.1:136234-176667
MSTRG.58374.18	NW_004973332.1 : 95875 - 98522	DENND3	NW_004973332.1:136234-176667
MSTRG.57768.1	NW_004973329.1 : 247332 - 248499	IPO5	NW_004973329.1:200264-243847
MSTRG.57768.1	NW_004973329.1 : 247332 - 248499	LOC110360292	NW_004973329.1:165778-199583
MSTRG.57588.1	NW_004973328.1 : 106282 - 115212	AQP3	NW_004973328.1:166302-179084
MSTRG.57588.1	NW_004973328.1 : 106282 - 115212	LOC102092050	NW_004973328.1:15355-25796
MSTRG.57017.1	NW_004973324.1 : 4002260 - 4006102	MICALL2	NW_004973324.1:4073495-4103112
MSTRG.57017.1	NW_004973324.1 : 4002260 - 4006102	INTS1	NW_004973324.1:4041909-4070941
MSTRG.57017.1	NW_004973324.1 : 4002260 - 4006102	LOC102090839	NW_004973324.1:4025858-4041064
MSTRG.57017.1	NW_004973324.1 : 4002260 - 4006102	MAFK	NW_004973324.1:4016299-4022075
MSTRG.57017.1	NW_004973324.1 : 4002260 - 4006102	PSMG3	NW_004973324.1:3997439-4000351
MSTRG.56972.4	NW_004973324.1 : 3445923 - 3449718	MRM2	NW_004973324.1:3479281-3481089
MSTRG.56972.4	NW_004973324.1 : 3445923 - 3449718	NUDT1	NW_004973324.1:3473934-3477813
MSTRG.56972.4	NW_004973324.1 : 3445923 - 3449718	CHST12	NW_004973324.1:3409772-3415621
MSTRG.56972.4	NW_004973324.1 : 3445923 - 3449718	LOC102084218	NW_004973324.1:3378321-3380875
MSTRG.56926.34	NW_004973324.1 : 3238228 - 3246502	LFNG	NW_004973324.1:3294729-3306465
MSTRG.56926.34	NW_004973324.1 : 3238228 - 3246502	TTYH3	NW_004973324.1:3248661-3282760
MSTRG.56926.34	NW_004973324.1 : 3238228 - 3246502	IQCE	NW_004973324.1:3177116-3202463
MSTRG.56926.34	NW_004973324.1 : 3238228 - 3246502	BRAT1	NW_004973324.1:3167285-3176499
MSTRG.56926.34	NW_004973324.1 : 3238228 - 3246502	AMZ1	NW_004973324.1:3139610-3148574
MSTRG.56851.8	NW_004973324.1 : 2588206 - 2755423	LOC102088003	NW_004973324.1:2566196-2579821
MSTRG.56851.8	NW_004973324.1 : 2588206 - 2755423	LOC102087823	NW_004973324.1:2530330-2541724
MSTRG.55312.1	NW_004973320.1 : 999434 - 999965	ANKRD16	NW_004973320.1:975281-997499
MSTRG.55312.1	NW_004973320.1 : 999434 - 999965	GDI2	NW_004973320.1:955533-968787
MSTRG.55312.1	NW_004973320.1 : 999434 - 999965	FAM208B	NW_004973320.1:919496-954688
MSTRG.55487.1	NW_004973320.1 : 2324481 - 2421757	MAPK8IP2	NW_004973320.1:2298004-2308686
MSTRG.55487.1	NW_004973320.1 : 2324481 - 2421757	CHKB	NW_004973320.1:2284181-2286707
MSTRG.55487.1	NW_004973320.1 : 2324481 - 2421757	CPT1B	NW_004973320.1:2270335-2281627
MSTRG.55487.1	NW_004973320.1 : 2324481 - 2421757	LOC102093925	NW_004973320.1:2258665-2261581
MSTRG.55487.1	NW_004973320.1 : 2324481 - 2421757	LOC102093562	NW_004973320.1:2238066-2244952
MSTRG.55487.1	NW_004973320.1 : 2324481 - 2421757	NCAPH2	NW_004973320.1:2227506-2237878
MSTRG.55338.4	NW_004973320.1 : 1166587 - 1234407	NRF1	NW_004973320.1:1265837-1324233
MSTRG.55338.39	NW_004973320.1 : 1208675 - 1210733	UBE2H	NW_004973320.1:1226873-1250148
MSTRG.55341.11	NW_004973320.1 : 1266489 - 1277828	UBE2H	NW_004973320.1:1226873-1250148
MSTRG.55338.39	NW_004973320.1 : 1208675 - 1210733	ZC3HC1	NW_004973320.1:1185648-1197259
MSTRG.55341.11	NW_004973320.1 : 1266489 - 1277828	ZC3HC1	NW_004973320.1:1185648-1197259
MSTRG.55338.39	NW_004973320.1 : 1208675 - 1210733	KLHDC10	NW_004973320.1:1158289-1168747
MSTRG.55338.39	NW_004973320.1 : 1208675 - 1210733	LOC102088800	NW_004973320.1:1150738-1156886
MSTRG.55338.4	NW_004973320.1 : 1166587 - 1234407	LOC102088800	NW_004973320.1:1150738-1156886
MSTRG.55338.39	NW_004973320.1 : 1208675 - 1210733	TMEM209	NW_004973320.1:1134525-1148337
MSTRG.55338.4	NW_004973320.1 : 1166587 - 1234407	TMEM209	NW_004973320.1:1134525-1148337
MSTRG.55338.39	NW_004973320.1 : 1208675 - 1210733	LOC102098475	NW_004973320.1:1117585-1131473
MSTRG.55338.4	NW_004973320.1 : 1166587 - 1234407	LOC102098475	NW_004973320.1:1117585-1131473
MSTRG.55338.39	NW_004973320.1 : 1208675 - 1210733	LOC102098295	NW_004973320.1:1109247-1114627
MSTRG.55338.4	NW_004973320.1 : 1166587 - 1234407	LOC102098295	NW_004973320.1:1109247-1114627
MSTRG.55338.4	NW_004973320.1 : 1166587 - 1234407	LOC102098115	NW_004973320.1:1104203-1108091
MSTRG.55338.4	NW_004973320.1 : 1166587 - 1234407	CEP41	NW_004973320.1:1090661-1100538
MSTRG.55312.1	NW_004973320.1 : 999434 - 999965	MEST	NW_004973320.1:1080680-1088229
MSTRG.55338.4	NW_004973320.1 : 1166587 - 1234407	MEST	NW_004973320.1:1080680-1088229
MSTRG.55312.1	NW_004973320.1 : 999434 - 999965	COPG2	NW_004973320.1:1056566-1080779
MSTRG.55312.1	NW_004973320.1 : 999434 - 999965	IL15RA	NW_004973320.1:1034444-1037149
MSTRG.54298.22	NW_004973313.1 : 1199850 - 1218093	MAMDC2	NW_004973313.1:1153817-1195646
MSTRG.54298.16	NW_004973313.1 : 1191145 - 1199623	SMC5	NW_004973313.1:1106481-1149973
MSTRG.54298.22	NW_004973313.1 : 1199850 - 1218093	SMC5	NW_004973313.1:1106481-1149973
MSTRG.53869.1	NW_004973312.1 : 1722749 - 1727149	CUL2	NW_004973312.1:1739665-1786431
MSTRG.53869.1	NW_004973312.1 : 1722749 - 1727149	CREM	NW_004973312.1:1687651-1718179
MSTRG.52811.1	NW_004973309.1 : 126184 - 127452	ABHD17C	NW_004973309.1:87386-117779
MSTRG.52811.1	NW_004973309.1 : 126184 - 127452	LOC102092464	NW_004973309.1:31606-75068
MSTRG.53059.1	NW_004973309.1 : 1139367 - 1142321	MRPS11	NW_004973309.1:1041296-1044760
MSTRG.53059.2	NW_004973309.1 : 1140798 - 1142246	MRPS11	NW_004973309.1:1041296-1044760
MSTRG.52782.4	NW_004973308.1 : 257666 - 264769	MKLN1	NW_004973308.1:270094-363099
MSTRG.52559.1	NW_004973304.1 : 729886 - 732817	RBM45	NW_004973304.1:774439-786294
MSTRG.52559.1	NW_004973304.1 : 729886 - 732817	DFNB59	NW_004973304.1:638387-663855
MSTRG.52559.1	NW_004973304.1 : 729886 - 732817	FKBP7	NW_004973304.1:632097-637713
MSTRG.52497.2	NW_004973304.1 : 285152 - 286685	CCDC141	NW_004973304.1:294171-367240
MSTRG.52497.2	NW_004973304.1 : 285152 - 286685	SESTD1	NW_004973304.1:223456-284513
MSTRG.52158.1	NW_004973302.1 : 194964 - 198067	PLEKHM3	NW_004973302.1:201365-289743
MSTRG.52159.2	NW_004973302.1 : 222020 - 224310	LOC102092721	NW_004973302.1:161804-203686
MSTRG.52158.1	NW_004973302.1 : 194964 - 198067	LOC110359849	NW_004973302.1:150833-160222
MSTRG.52159.2	NW_004973302.1 : 222020 - 224310	LOC110359849	NW_004973302.1:150833-160222
MSTRG.52158.1	NW_004973302.1 : 194964 - 198067	WDR12	NW_004973302.1:140404-148066
MSTRG.52159.2	NW_004973302.1 : 222020 - 224310	WDR12	NW_004973302.1:140404-148066
MSTRG.52158.1	NW_004973302.1 : 194964 - 198067	LSS	NW_004973302.1:124816-133722
MSTRG.52159.2	NW_004973302.1 : 222020 - 224310	LSS	NW_004973302.1:124816-133722
MSTRG.52158.1	NW_004973302.1 : 194964 - 198067	S100B	NW_004973302.1:111774-118373
MSTRG.51962.1	NW_004973300.1 : 178956 - 226056	LOC102091618	NW_004973300.1:320614-324403
MSTRG.51962.1	NW_004973300.1 : 178956 - 226056	LOC110359835	NW_004973300.1:316946-320870
MSTRG.51962.1	NW_004973300.1 : 178956 - 226056	LOC110359822	NW_004973300.1:314447-316826
MSTRG.51962.1	NW_004973300.1 : 178956 - 226056	HDGFL2	NW_004973300.1:305482-313568
MSTRG.51962.1	NW_004973300.1 : 178956 - 226056	UBXN6	NW_004973300.1:293616-299996
MSTRG.51962.1	NW_004973300.1 : 178956 - 226056	CHAF1A	NW_004973300.1:279567-294184
MSTRG.51962.1	NW_004973300.1 : 178956 - 226056	SH3GL1	NW_004973300.1:251185-261681
MSTRG.51962.1	NW_004973300.1 : 178956 - 226056	MPND	NW_004973300.1:247740-251049
MSTRG.51962.1	NW_004973300.1 : 178956 - 226056	FSD1	NW_004973300.1:240885-245823
MSTRG.51962.1	NW_004973300.1 : 178956 - 226056	SHD	NW_004973300.1:234977-236993
MSTRG.51962.1	NW_004973300.1 : 178956 - 226056	CCDC94	NW_004973300.1:226162-233295
MSTRG.51962.1	NW_004973300.1 : 178956 - 226056	CTXN1	NW_004973300.1:144479-150623
MSTRG.51778.37	NW_004973299.1 : 1114828 - 1120127	PIK3IP1	NW_004973299.1:1190977-1195912
MSTRG.51778.37	NW_004973299.1 : 1114828 - 1120127	PATZ1	NW_004973299.1:1158774-1178083
MSTRG.51778.37	NW_004973299.1 : 1114828 - 1120127	DRG1	NW_004973299.1:1145002-1148862
MSTRG.51778.37	NW_004973299.1 : 1114828 - 1120127	EIF4ENIF1	NW_004973299.1:1123016-1143716
MSTRG.51778.37	NW_004973299.1 : 1114828 - 1120127	PISD	NW_004973299.1:1085681-1093018
MSTRG.51778.37	NW_004973299.1 : 1114828 - 1120127	LOC102096912	NW_004973299.1:1053775-1066981
MSTRG.51778.37	NW_004973299.1 : 1114828 - 1120127	PRR14L	NW_004973299.1:1033579-1053642
MSTRG.51464.1	NW_004973297.1 : 6982279 - 6983318	FOSL2	NW_004973297.1:6926325-6939059
MSTRG.51365.1	NW_004973297.1 : 6591329 - 6603413	MRPL33	NW_004973297.1:6649137-6654709
MSTRG.50629.1	NW_004973297.1 : 2818902 - 2820988	DLK2	NW_004973297.1:2886500-2894195
MSTRG.50629.1	NW_004973297.1 : 2818902 - 2820988	ABCC10	NW_004973297.1:2868035-2885825
MSTRG.50629.1	NW_004973297.1 : 2818902 - 2820988	ZNF318	NW_004973297.1:2828988-2856857
MSTRG.50629.1	NW_004973297.1 : 2818902 - 2820988	FAM98A	NW_004973297.1:2801124-2815299
MSTRG.50629.1	NW_004973297.1 : 2818902 - 2820988	RASGRP3	NW_004973297.1:2733778-2794714
MSTRG.49619.16	NW_004973292.1 : 663771 - 666692	PRDX4	NW_004973292.1:714145-720296
MSTRG.49619.16	NW_004973292.1 : 663771 - 666692	ACOT9	NW_004973292.1:688623-711439
MSTRG.49619.16	NW_004973292.1 : 663771 - 666692	SAT1	NW_004973292.1:676815-679866
MSTRG.49619.16	NW_004973292.1 : 663771 - 666692	APOO	NW_004973292.1:623424-656512
MSTRG.49619.16	NW_004973292.1 : 663771 - 666692	KLHL15	NW_004973292.1:585828-612016
MSTRG.49619.16	NW_004973292.1 : 663771 - 666692	EIF2S3	NW_004973292.1:571088-583204
MSTRG.49873.19	NW_004973292.1 : 2348968 - 2355562	CUNHXorf23	NW_004973292.1:2432213-2447930
MSTRG.49873.19	NW_004973292.1 : 2348968 - 2355562	MAP7D2	NW_004973292.1:2378000-2417839
MSTRG.49873.19	NW_004973292.1 : 2348968 - 2355562	EIF1AX	NW_004973292.1:2292717-2303155
MSTRG.49731.14	NW_004973292.1 : 1627604 - 1635015	KLHL34	NW_004973292.1:1602538-1606030
MSTRG.49733.1	NW_004973292.1 : 1613826 - 1615182	KLHL34	NW_004973292.1:1602538-1606030
MSTRG.49731.14	NW_004973292.1 : 1627604 - 1635015	SMPX	NW_004973292.1:1544272-1584721
MSTRG.49733.1	NW_004973292.1 : 1613826 - 1615182	SMPX	NW_004973292.1:1544272-1584721
MSTRG.49522.3	NW_004973291.1 : 43199 - 44976	VPS45	NW_004973291.1:89103-103148
MSTRG.49522.3	NW_004973291.1 : 43199 - 44976	PLEKHO1	NW_004973291.1:72039-86800
MSTRG.49522.3	NW_004973291.1 : 43199 - 44976	ANP32E	NW_004973291.1:48924-56678
MSTRG.49522.3	NW_004973291.1 : 43199 - 44976	APH1A	NW_004973291.1:36235-38461
MSTRG.49522.3	NW_004973291.1 : 43199 - 44976	RPRD2	NW_004973291.1:360-15770
MSTRG.49522.3	NW_004973291.1 : 43199 - 44976	PRPF3	NW_004973291.1:15918-26735
MSTRG.49522.3	NW_004973291.1 : 43199 - 44976	SF3B4	NW_004973291.1:135712-140632
MSTRG.49522.3	NW_004973291.1 : 43199 - 44976	OTUD7B	NW_004973291.1:108120-126411
MSTRG.47152.1	NW_004973290.1 : 695632 - 698426	B4GALT7	NW_004973290.1:792622-794855
MSTRG.47152.1	NW_004973290.1 : 695632 - 698426	N4BP3	NW_004973290.1:782526-786032
MSTRG.47152.1	NW_004973290.1 : 695632 - 698426	NHP2	NW_004973290.1:780685-782025
MSTRG.47152.1	NW_004973290.1 : 695632 - 698426	LOC102098343	NW_004973290.1:777883-780194
MSTRG.47152.1	NW_004973290.1 : 695632 - 698426	BRD8	NW_004973290.1:755809-778226
MSTRG.47152.1	NW_004973290.1 : 695632 - 698426	KIF20A	NW_004973290.1:744971-755028
MSTRG.47152.1	NW_004973290.1 : 695632 - 698426	SFXN1	NW_004973290.1:726623-746712
MSTRG.47152.1	NW_004973290.1 : 695632 - 698426	DRD1	NW_004973290.1:710984-716124
MSTRG.47127.2	NW_004973290.1 : 160921 - 448641	LOC110359644	NW_004973290.1:540527-544021
MSTRG.49304.20	NW_004973290.1 : 15816988 - 15819411	MATR3	NW_004973290.1:15788275-15813514
MSTRG.49304.20	NW_004973290.1 : 15816988 - 15819411	PAIP2	NW_004973290.1:15777494-15783822
MSTRG.49304.20	NW_004973290.1 : 15816988 - 15819411	SLC23A1	NW_004973290.1:15770630-15775411
MSTRG.49260.2	NW_004973290.1 : 15607008 - 15671237	MZB1	NW_004973290.1:15769198-15770459
MSTRG.49260.5	NW_004973290.1 : 15641867 - 15671237	MZB1	NW_004973290.1:15769198-15770459
MSTRG.49304.20	NW_004973290.1 : 15816988 - 15819411	MZB1	NW_004973290.1:15769198-15770459
MSTRG.49260.2	NW_004973290.1 : 15607008 - 15671237	LOC110359456	NW_004973290.1:15762601-15767575
MSTRG.49260.5	NW_004973290.1 : 15641867 - 15671237	LOC110359456	NW_004973290.1:15762601-15767575
MSTRG.49304.20	NW_004973290.1 : 15816988 - 15819411	LOC110359456	NW_004973290.1:15762601-15767575
MSTRG.49260.2	NW_004973290.1 : 15607008 - 15671237	LOC110359610	NW_004973290.1:15760157-15762417
MSTRG.49260.5	NW_004973290.1 : 15641867 - 15671237	LOC110359610	NW_004973290.1:15760157-15762417
MSTRG.49304.20	NW_004973290.1 : 15816988 - 15819411	LOC110359610	NW_004973290.1:15760157-15762417
MSTRG.49260.2	NW_004973290.1 : 15607008 - 15671237	DNAJC18	NW_004973290.1:15746326-15758143
MSTRG.49260.5	NW_004973290.1 : 15641867 - 15671237	DNAJC18	NW_004973290.1:15746326-15758143
MSTRG.49304.20	NW_004973290.1 : 15816988 - 15819411	DNAJC18	NW_004973290.1:15746326-15758143
MSTRG.49260.2	NW_004973290.1 : 15607008 - 15671237	ECSCR	NW_004973290.1:15725717-15744763
MSTRG.49260.5	NW_004973290.1 : 15641867 - 15671237	ECSCR	NW_004973290.1:15725717-15744763
MSTRG.49304.20	NW_004973290.1 : 15816988 - 15819411	ECSCR	NW_004973290.1:15725717-15744763
MSTRG.49260.2	NW_004973290.1 : 15607008 - 15671237	PCDH12	NW_004973290.1:15700916-15718428
MSTRG.49260.5	NW_004973290.1 : 15641867 - 15671237	PCDH12	NW_004973290.1:15700916-15718428
MSTRG.49260.2	NW_004973290.1 : 15607008 - 15671237	KIAA0141	NW_004973290.1:15680478-15703907
MSTRG.49260.5	NW_004973290.1 : 15641867 - 15671237	KIAA0141	NW_004973290.1:15680478-15703907
MSTRG.47331.1	NW_004973290.1 : 1449812 - 1457610	RNF145	NW_004973290.1:1397527-1429253
MSTRG.47331.1	NW_004973290.1 : 1449812 - 1457610	UBLCP1	NW_004973290.1:1369629-1379897
MSTRG.47331.1	NW_004973290.1 : 1449812 - 1457610	LOC102086591	NW_004973290.1:1350207-1357200
MSTRG.47127.2	NW_004973290.1 : 160921 - 448641	CPEB4	NW_004973290.1:118029-158663
MSTRG.46616.66	NW_004973287.1 : 1123958 - 1128460	MRPS23	NW_004973287.1:1037040-1039117
MSTRG.46310.9	NW_004973285.1 : 5836696 - 5869290	LOC102095508	NW_004973285.1:5898584-5904650
MSTRG.46310.9	NW_004973285.1 : 5836696 - 5869290	TEKT3	NW_004973285.1:5807302-5817423
MSTRG.46310.9	NW_004973285.1 : 5836696 - 5869290	PMP22	NW_004973285.1:5781615-5799581
MSTRG.46149.3	NW_004973285.1 : 4648410 - 4650648	ZNF750	NW_004973285.1:4702695-4711146
MSTRG.46149.3	NW_004973285.1 : 4648410 - 4650648	LOC102083783	NW_004973285.1:4659927-4671281
MSTRG.46149.3	NW_004973285.1 : 4648410 - 4650648	LOC102083608	NW_004973285.1:4653230-4659891
MSTRG.46149.3	NW_004973285.1 : 4648410 - 4650648	RAB40B	NW_004973285.1:4637288-4646170
MSTRG.46149.3	NW_004973285.1 : 4648410 - 4650648	WDR45B	NW_004973285.1:4620975-4634323
MSTRG.46149.3	NW_004973285.1 : 4648410 - 4650648	FOXK2	NW_004973285.1:4561920-4616557
MSTRG.45782.1	NW_004973285.1 : 2137138 - 2140773	UTP18	NW_004973285.1:2177976-2186055
MSTRG.45782.1	NW_004973285.1 : 2137138 - 2140773	MBTD1	NW_004973285.1:2148433-2176773
MSTRG.45782.1	NW_004973285.1 : 2137138 - 2140773	LOC102089990	NW_004973285.1:2145867-2148078
MSTRG.45782.1	NW_004973285.1 : 2137138 - 2140773	LOC102089814	NW_004973285.1:2141722-2144991
MSTRG.45782.1	NW_004973285.1 : 2137138 - 2140773	SPAG9	NW_004973285.1:2074236-2130461
MSTRG.45681.1	NW_004973285.1 : 1554955 - 1556508	LRRC59	NW_004973285.1:1647902-1652148
MSTRG.45681.1	NW_004973285.1 : 1554955 - 1556508	EME1	NW_004973285.1:1641855-1646364
MSTRG.45681.1	NW_004973285.1 : 1554955 - 1556508	MRPL27	NW_004973285.1:1638004-1641512
MSTRG.45681.1	NW_004973285.1 : 1554955 - 1556508	XYLT2	NW_004973285.1:1621497-1630887
MSTRG.45681.1	NW_004973285.1 : 1554955 - 1556508	LOC102086590	NW_004973285.1:1615474-1619588
MSTRG.45681.1	NW_004973285.1 : 1554955 - 1556508	LOC110359350	NW_004973285.1:1614543-1615375
MSTRG.45681.1	NW_004973285.1 : 1554955 - 1556508	LOC102089488	NW_004973285.1:1610828-1614050
MSTRG.45681.1	NW_004973285.1 : 1554955 - 1556508	RAB37	NW_004973285.1:1592796-1602263
MSTRG.45681.1	NW_004973285.1 : 1554955 - 1556508	SLC9A3R1	NW_004973285.1:1582620-1585557
MSTRG.45681.1	NW_004973285.1 : 1554955 - 1556508	NAT9	NW_004973285.1:1575977-1580542
MSTRG.45681.1	NW_004973285.1 : 1554955 - 1556508	GRIN2C	NW_004973285.1:1511706-1528510
MSTRG.45681.1	NW_004973285.1 : 1554955 - 1556508	FDXR	NW_004973285.1:1490116-1499730
MSTRG.45681.1	NW_004973285.1 : 1554955 - 1556508	FADS6	NW_004973285.1:1483000-1488298
MSTRG.45681.1	NW_004973285.1 : 1554955 - 1556508	USH1G	NW_004973285.1:1456752-1466276
MSTRG.45225.15	NW_004973284.1 : 721075 - 723200	TIGAR	NW_004973284.1:807174-819842
MSTRG.45225.15	NW_004973284.1 : 721075 - 723200	FGF23	NW_004973284.1:789747-796061
MSTRG.45225.15	NW_004973284.1 : 721075 - 723200	FGF6	NW_004973284.1:764211-772268
MSTRG.45225.15	NW_004973284.1 : 721075 - 723200	RAD51AP1	NW_004973284.1:706808-719630
MSTRG.45225.15	NW_004973284.1 : 721075 - 723200	DYRK4	NW_004973284.1:659870-686982
MSTRG.45091.6	NW_004973283.1 : 1439900 - 1442781	LOC102091424	NW_004973283.1:1457854-1506693
MSTRG.45092.1	NW_004973283.1 : 1448851 - 1451176	LOC102091424	NW_004973283.1:1457854-1506693
MSTRG.45091.6	NW_004973283.1 : 1439900 - 1442781	MYBBP1A	NW_004973283.1:1382613-1435976
MSTRG.45092.1	NW_004973283.1 : 1448851 - 1451176	MYBBP1A	NW_004973283.1:1382613-1435976
MSTRG.45091.6	NW_004973283.1 : 1439900 - 1442781	EIF4H	NW_004973283.1:1369830-1377267
MSTRG.45092.1	NW_004973283.1 : 1448851 - 1451176	EIF4H	NW_004973283.1:1369830-1377267
MSTRG.45091.6	NW_004973283.1 : 1439900 - 1442781	LAT2	NW_004973283.1:1347387-1365206
MSTRG.44818.1	NW_004973281.1 : 948100 - 952839	TBC1D12	NW_004973281.1:996056-1042203
MSTRG.44818.1	NW_004973281.1 : 948100 - 952839	LOC102088684	NW_004973281.1:975862-987226
MSTRG.44818.1	NW_004973281.1 : 948100 - 952839	TNKS2	NW_004973281.1:918767-942804
MSTRG.44791.6	NW_004973281.1 : 803417 - 806872	PPP1R3C	NW_004973281.1:883639-885815
MSTRG.44818.1	NW_004973281.1 : 948100 - 952839	PPP1R3C	NW_004973281.1:883639-885815
MSTRG.44723.1	NW_004973281.1 : 422540 - 423045	PANK1	NW_004973281.1:359264-408799
MSTRG.43961.1	NW_004973279.1 : 470889 - 480419	TES	NW_004973279.1:526260-554920
MSTRG.43961.1	NW_004973279.1 : 470889 - 480419	CAV1	NW_004973279.1:398200-417562
MSTRG.44261.31	NW_004973279.1 : 2191050 - 2199719	TMEM168	NW_004973279.1:2219786-2243230
MSTRG.43799.1	NW_004973278.1 : 2448209 - 2448922	FAM173B	NW_004973278.1:2487841-2500220
MSTRG.43799.1	NW_004973278.1 : 2448209 - 2448922	CCT5	NW_004973278.1:2479718-2487639
MSTRG.43799.1	NW_004973278.1 : 2448209 - 2448922	LOC102090835	NW_004973278.1:2453014-2463431
MSTRG.43799.1	NW_004973278.1 : 2448209 - 2448922	LOC102089053	NW_004973278.1:2406689-2432736
MSTRG.43799.1	NW_004973278.1 : 2448209 - 2448922	LOC102088428	NW_004973278.1:2388387-2399760
MSTRG.43543.1	NW_004973277.1 : 2427357 - 2446065	LOC102095881	NW_004973277.1:2529807-2538019
MSTRG.43543.1	NW_004973277.1 : 2427357 - 2446065	SCARF2	NW_004973277.1:2502863-2517363
MSTRG.43543.1	NW_004973277.1 : 2427357 - 2446065	LOC102086841	NW_004973277.1:2468757-2489244
MSTRG.43516.15	NW_004973277.1 : 1510921 - 1538088	LOC110359142	NW_004973277.1:1550545-1615449
MSTRG.43516.15	NW_004973277.1 : 1510921 - 1538088	SLC35E4	NW_004973277.1:1494981-1498801
MSTRG.43516.15	NW_004973277.1 : 1510921 - 1538088	TCN2	NW_004973277.1:1490441-1493552
MSTRG.43516.15	NW_004973277.1 : 1510921 - 1538088	PES1	NW_004973277.1:1481016-1488695
MSTRG.43516.15	NW_004973277.1 : 1510921 - 1538088	GAL3ST1	NW_004973277.1:1470089-1475162
MSTRG.43516.15	NW_004973277.1 : 1510921 - 1538088	LOC110359134	NW_004973277.1:1464449-1468008
MSTRG.43516.15	NW_004973277.1 : 1510921 - 1538088	SEC14L2	NW_004973277.1:1457499-1461821
MSTRG.43516.15	NW_004973277.1 : 1510921 - 1538088	RNF215	NW_004973277.1:1448754-1452752
MSTRG.43516.15	NW_004973277.1 : 1510921 - 1538088	CCDC157	NW_004973277.1:1439464-1447835
MSTRG.43516.15	NW_004973277.1 : 1510921 - 1538088	SF3A1	NW_004973277.1:1424802-1437209
MSTRG.43016.1	NW_004973276.1 : 328757 - 484353	CRTAP	NW_004973276.1:292469-319702
MSTRG.43016.1	NW_004973276.1 : 328757 - 484353	SUSD5	NW_004973276.1:249163-290590
MSTRG.42668.10	NW_004973272.1 : 18480 - 26635	UBE2V2	NW_004973272.1:30144-41444
MSTRG.42677.1	NW_004973272.1 : 104734 - 112416	UBE2V2	NW_004973272.1:30144-41444
MSTRG.42679.1	NW_004973272.1 : 123252 - 124245	UBE2V2	NW_004973272.1:30144-41444
MSTRG.42536.22	NW_004973270.1 : 863952 - 884712	TSEN2	NW_004973270.1:958485-975172
MSTRG.42561.1	NW_004973270.1 : 1016688 - 1025205	TSEN2	NW_004973270.1:958485-975172
MSTRG.42536.22	NW_004973270.1 : 863952 - 884712	MKRN2OS	NW_004973270.1:955991-961302
MSTRG.42561.1	NW_004973270.1 : 1016688 - 1025205	MKRN2OS	NW_004973270.1:955991-961302
MSTRG.42536.22	NW_004973270.1 : 863952 - 884712	MKRN2	NW_004973270.1:943586-955544
MSTRG.42561.1	NW_004973270.1 : 1016688 - 1025205	MKRN2	NW_004973270.1:943586-955544
MSTRG.42536.22	NW_004973270.1 : 863952 - 884712	CNBP	NW_004973270.1:820889-823852
MSTRG.42536.22	NW_004973270.1 : 863952 - 884712	ISY1	NW_004973270.1:808447-817618
MSTRG.42536.22	NW_004973270.1 : 863952 - 884712	LOC102095443	NW_004973270.1:793785-805081
MSTRG.42608.1	NW_004973270.1 : 1300930 - 1309650	TAMM41	NW_004973270.1:1348600-1383097
MSTRG.42609.43	NW_004973270.1 : 1434246 - 1437019	TAMM41	NW_004973270.1:1348600-1383097
MSTRG.42588.1	NW_004973270.1 : 1154921 - 1156154	TIMP4	NW_004973270.1:1173881-1184177
MSTRG.42092.41	NW_004973269.1 : 796392 - 808181	SPTLC1	NW_004973269.1:829434-872863
MSTRG.42099.13	NW_004973269.1 : 912797 - 984277	SPTLC1	NW_004973269.1:829434-872863
MSTRG.42038.27	NW_004973269.1 : 512632 - 521049	NFIL3	NW_004973269.1:557733-571433
MSTRG.42038.28	NW_004973269.1 : 514792 - 516261	NFIL3	NW_004973269.1:557733-571433
MSTRG.42403.1	NW_004973269.1 : 3431289 - 3444963	RAD23B	NW_004973269.1:3450763-3492695
MSTRG.42403.1	NW_004973269.1 : 3431289 - 3444963	LOC102094769	NW_004973269.1:3401040-3405326
MSTRG.42330.1	NW_004973269.1 : 2786173 - 2787061	LOC110359059	NW_004973269.1:2882863-2886324
MSTRG.42330.1	NW_004973269.1 : 2786173 - 2787061	LMNB1	NW_004973269.1:2848512-2873453
MSTRG.42330.1	NW_004973269.1 : 2786173 - 2787061	CUNH5orf63	NW_004973269.1:2745123-2755257
MSTRG.42223.1	NW_004973269.1 : 2369719 - 2373162	SLC12A2	NW_004973269.1:2302186-2366965
MSTRG.42099.13	NW_004973269.1 : 912797 - 984277	HINT1	NW_004973269.1:1073316-1074587
MSTRG.42099.13	NW_004973269.1 : 912797 - 984277	LYRM7	NW_004973269.1:1051699-1065082
MSTRG.41962.15	NW_004973268.1 : 1058785 - 1110751	BATF3	NW_004973268.1:984114-988724
MSTRG.41962.20	NW_004973268.1 : 1061990 - 1085395	BATF3	NW_004973268.1:984114-988724
MSTRG.41962.15	NW_004973268.1 : 1058785 - 1110751	NSL1	NW_004973268.1:968983-980553
MSTRG.41962.20	NW_004973268.1 : 1061990 - 1085395	NSL1	NW_004973268.1:968983-980553
MSTRG.41962.15	NW_004973268.1 : 1058785 - 1110751	TATDN3	NW_004973268.1:962113-968455
MSTRG.41962.20	NW_004973268.1 : 1061990 - 1085395	TATDN3	NW_004973268.1:962113-968455
MSTRG.41962.15	NW_004973268.1 : 1058785 - 1110751	PPP2R5A	NW_004973268.1:1137553-1184437
MSTRG.41962.20	NW_004973268.1 : 1061990 - 1085395	PPP2R5A	NW_004973268.1:1137553-1184437
MSTRG.41962.15	NW_004973268.1 : 1058785 - 1110751	TMEM206	NW_004973268.1:1115696-1135526
MSTRG.41962.20	NW_004973268.1 : 1061990 - 1085395	TMEM206	NW_004973268.1:1115696-1135526
MSTRG.41962.20	NW_004973268.1 : 1061990 - 1085395	NENF	NW_004973268.1:1107197-1115871
MSTRG.41962.15	NW_004973268.1 : 1058785 - 1110751	ATF3	NW_004973268.1:1018802-1025952
MSTRG.41962.20	NW_004973268.1 : 1061990 - 1085395	ATF3	NW_004973268.1:1018802-1025952
MSTRG.41046.1	NW_004973266.1 : 792859 - 803402	LOC102094474	NW_004973266.1:770439-787619
MSTRG.41046.1	NW_004973266.1 : 792859 - 803402	STAU1	NW_004973266.1:740877-763700
MSTRG.41046.1	NW_004973266.1 : 792859 - 803402	CSE1L	NW_004973266.1:710200-729172
MSTRG.40207.1	NW_004973265.1 : 8289333 - 8294383	UNC50	NW_004973265.1:8243781-8248655
MSTRG.40207.1	NW_004973265.1 : 8289333 - 8294383	LOC102098649	NW_004973265.1:8237586-8243432
MSTRG.39939.2	NW_004973265.1 : 4723218 - 4727710	LOC102094409	NW_004973265.1:4802676-4814131
MSTRG.39940.1	NW_004973265.1 : 4725179 - 4727197	LOC102094409	NW_004973265.1:4802676-4814131
MSTRG.39942.2	NW_004973265.1 : 4730231 - 4730934	LOC102094409	NW_004973265.1:4802676-4814131
MSTRG.39939.2	NW_004973265.1 : 4723218 - 4727710	LOC102094408	NW_004973265.1:4767699-4793297
MSTRG.39940.1	NW_004973265.1 : 4725179 - 4727197	LOC102094408	NW_004973265.1:4767699-4793297
MSTRG.39942.2	NW_004973265.1 : 4730231 - 4730934	LOC102094408	NW_004973265.1:4767699-4793297
MSTRG.39939.2	NW_004973265.1 : 4723218 - 4727710	SLC25A6	NW_004973265.1:4763456-4767695
MSTRG.39940.1	NW_004973265.1 : 4725179 - 4727197	SLC25A6	NW_004973265.1:4763456-4767695
MSTRG.39942.2	NW_004973265.1 : 4730231 - 4730934	SLC25A6	NW_004973265.1:4763456-4767695
MSTRG.39939.2	NW_004973265.1 : 4723218 - 4727710	ASMTL	NW_004973265.1:4731623-4758682
MSTRG.39940.1	NW_004973265.1 : 4725179 - 4727197	ASMTL	NW_004973265.1:4731623-4758682
MSTRG.39942.2	NW_004973265.1 : 4730231 - 4730934	ASMTL	NW_004973265.1:4731623-4758682
MSTRG.39939.2	NW_004973265.1 : 4723218 - 4727710	P2RY8	NW_004973265.1:4682126-4720217
MSTRG.39940.1	NW_004973265.1 : 4725179 - 4727197	P2RY8	NW_004973265.1:4682126-4720217
MSTRG.39942.2	NW_004973265.1 : 4730231 - 4730934	P2RY8	NW_004973265.1:4682126-4720217
MSTRG.39939.2	NW_004973265.1 : 4723218 - 4727710	AKAP17A	NW_004973265.1:4628303-4639642
MSTRG.39940.1	NW_004973265.1 : 4725179 - 4727197	AKAP17A	NW_004973265.1:4628303-4639642
MSTRG.39470.29	NW_004973265.1 : 252511 - 254891	GPR143	NW_004973265.1:314973-344543
MSTRG.39470.29	NW_004973265.1 : 252511 - 254891	SHROOM2	NW_004973265.1:173599-249500
MSTRG.39457.4	NW_004973265.1 : 6696 - 9211	WWC3	NW_004973265.1:16261-81047
MSTRG.36855.1	NW_004973262.1 : 7096355 - 7560174	TMEM229B	NW_004973262.1:7583661-7633527
MSTRG.36855.1	NW_004973262.1 : 7096355 - 7560174	LOC102089049	NW_004973262.1:7077668-7091752
MSTRG.36736.1	NW_004973262.1 : 6159862 - 6167832	LOC102084647	NW_004973262.1:6106546-6158925
MSTRG.36570.4	NW_004973262.1 : 4127464 - 4130156	CDAN1	NW_004973262.1:4131506-4169449
MSTRG.36087.27	NW_004973262.1 : 407180 - 420407	FUT8	NW_004973262.1:321495-401332
MSTRG.38415.6	NW_004973262.1 : 18404796 - 18409042	YLPM1	NW_004973262.1:18464697-18502924
MSTRG.38415.6	NW_004973262.1 : 18404796 - 18409042	FCF1	NW_004973262.1:18455445-18461234
MSTRG.38415.6	NW_004973262.1 : 18404796 - 18409042	AREL1	NW_004973262.1:18431513-18452672
MSTRG.38415.6	NW_004973262.1 : 18404796 - 18409042	LTBP2	NW_004973262.1:18330238-18403215
MSTRG.38415.6	NW_004973262.1 : 18404796 - 18409042	NPC2	NW_004973262.1:18326728-18329468
MSTRG.38415.6	NW_004973262.1 : 18404796 - 18409042	ISCA2	NW_004973262.1:18320252-18322684
MSTRG.35971.4	NW_004973261.1 : 4159052 - 4161776	NLE1	NW_004973261.1:4243668-4250623
MSTRG.35971.4	NW_004973261.1 : 4159052 - 4161776	AKAP10	NW_004973261.1:4227986-4243256
MSTRG.35971.4	NW_004973261.1 : 4159052 - 4161776	LOC110358551	NW_004973261.1:4186158-4211288
MSTRG.35971.4	NW_004973261.1 : 4159052 - 4161776	TMEM211	NW_004973261.1:4162091-4209767
MSTRG.35971.4	NW_004973261.1 : 4159052 - 4161776	ASPA	NW_004973261.1:4141901-4151515
MSTRG.35971.4	NW_004973261.1 : 4159052 - 4161776	TRPV3	NW_004973261.1:4111193-4140315
MSTRG.35971.4	NW_004973261.1 : 4159052 - 4161776	LOC102083725	NW_004973261.1:4097644-4111489
MSTRG.35971.4	NW_004973261.1 : 4159052 - 4161776	SHPK	NW_004973261.1:4088915-4097498
MSTRG.35971.4	NW_004973261.1 : 4159052 - 4161776	CTNS	NW_004973261.1:4083249-4088575
MSTRG.35971.4	NW_004973261.1 : 4159052 - 4161776	TAX1BP3	NW_004973261.1:4079301-4081585
MSTRG.35971.4	NW_004973261.1 : 4159052 - 4161776	EMC6	NW_004973261.1:4076850-4077300
MSTRG.35971.4	NW_004973261.1 : 4159052 - 4161776	P2RX5	NW_004973261.1:4062435-4074509
MSTRG.35791.1	NW_004973261.1 : 3128822 - 3130457	FLOT2	NW_004973261.1:3187888-3209800
MSTRG.35791.1	NW_004973261.1 : 3128822 - 3130457	ERAL1	NW_004973261.1:3178465-3184715
MSTRG.35791.1	NW_004973261.1 : 3128822 - 3130457	FAM222B	NW_004973261.1:3139866-3152000
MSTRG.35791.1	NW_004973261.1 : 3128822 - 3130457	TRAF4	NW_004973261.1:3134368-3137069
MSTRG.35791.1	NW_004973261.1 : 3128822 - 3130457	NEK8	NW_004973261.1:3116317-3127736
MSTRG.35791.1	NW_004973261.1 : 3128822 - 3130457	TLCD1	NW_004973261.1:3112256-3114147
MSTRG.35791.1	NW_004973261.1 : 3128822 - 3130457	RPL23A	NW_004973261.1:3106963-3109250
MSTRG.35791.1	NW_004973261.1 : 3128822 - 3130457	RAB34	NW_004973261.1:3103546-3106248
MSTRG.35791.1	NW_004973261.1 : 3128822 - 3130457	LOC106145674	NW_004973261.1:3102121-3103435
MSTRG.35791.1	NW_004973261.1 : 3128822 - 3130457	SUPT6H	NW_004973261.1:3075478-3097049
MSTRG.35791.1	NW_004973261.1 : 3128822 - 3130457	SDF2	NW_004973261.1:3069687-3071601
MSTRG.35791.1	NW_004973261.1 : 3128822 - 3130457	KIAA0100	NW_004973261.1:3055214-3070230
MSTRG.35791.1	NW_004973261.1 : 3128822 - 3130457	LOC102095621	NW_004973261.1:3050051-3054312
MSTRG.35791.1	NW_004973261.1 : 3128822 - 3130457	SPAG5	NW_004973261.1:3041103-3049985
MSTRG.35791.1	NW_004973261.1 : 3128822 - 3130457	ALDOC	NW_004973261.1:3036174-3038624
MSTRG.35791.1	NW_004973261.1 : 3128822 - 3130457	PIGS	NW_004973261.1:3030986-3034838
MSTRG.35639.2	NW_004973261.1 : 2407683 - 2410366	INPP5K	NW_004973261.1:2488082-2503189
MSTRG.35639.2	NW_004973261.1 : 2407683 - 2410366	MYO1C	NW_004973261.1:2432891-2474954
MSTRG.35639.2	NW_004973261.1 : 2407683 - 2410366	YWHAE	NW_004973261.1:2416943-2431440
MSTRG.35639.2	NW_004973261.1 : 2407683 - 2410366	NCBP3	NW_004973261.1:2372843-2387533
MSTRG.35016.6	NW_004973259.1 : 90961 - 100346	TRAM1	NW_004973259.1:45468-58183
MSTRG.35016.6	NW_004973259.1 : 90961 - 100346	XKR9	NW_004973259.1:3777-17445
MSTRG.35016.6	NW_004973259.1 : 90961 - 100346	LACTB2	NW_004973259.1:25753-41716
MSTRG.34937.5	NW_004973258.1 : 866594 - 868506	LYRM2	NW_004973258.1:861831-864879
MSTRG.34997.3	NW_004973258.1 : 1205592 - 1208341	BORCS6	NW_004973258.1:1187253-1190459
MSTRG.34997.3	NW_004973258.1 : 1205592 - 1208341	PM20D2	NW_004973258.1:1144874-1162919
MSTRG.34997.3	NW_004973258.1 : 1205592 - 1208341	GABRR1	NW_004973258.1:1108374-1138674
MSTRG.34377.1	NW_004973257.1 : 11567471 - 11571467	RGCC	NW_004973257.1:11498487-11507105
MSTRG.32487.2	NW_004973256.1 : 591641 - 593880	RRP1B	NW_004973256.1:616641-637251
MSTRG.32758.16	NW_004973256.1 : 3762530 - 3798338	OTC	NW_004973256.1:3847054-3882011
MSTRG.32398.2	NW_004973256.1 : 9498 - 10761	PDE9A	NW_004973256.1:25703-76182
MSTRG.31781.1	NW_004973254.1 : 7601099 - 7622433	LOC102087329	NW_004973254.1:7713126-7714815
MSTRG.31781.1	NW_004973254.1 : 7601099 - 7622433	ALKBH8	NW_004973254.1:7548012-7593614
MSTRG.31655.5	NW_004973254.1 : 6044041 - 6052827	RNF17	NW_004973254.1:6080476-6133308
MSTRG.31655.5	NW_004973254.1 : 6044041 - 6052827	CENPJ	NW_004973254.1:6060587-6079673
MSTRG.31655.5	NW_004973254.1 : 6044041 - 6052827	MPHOSPH8	NW_004973254.1:6017135-6036503
MSTRG.31655.5	NW_004973254.1 : 6044041 - 6052827	PSPC1	NW_004973254.1:5952985-5996815
MSTRG.31574.1	NW_004973254.1 : 5259518 - 5267123	SAP18	NW_004973254.1:5344025-5345294
MSTRG.31574.1	NW_004973254.1 : 5259518 - 5267123	SKA3	NW_004973254.1:5321367-5333997
MSTRG.31574.1	NW_004973254.1 : 5259518 - 5267123	MRPL57	NW_004973254.1:5319620-5320135
MSTRG.31574.1	NW_004973254.1 : 5259518 - 5267123	MICU2	NW_004973254.1:5191463-5254795
MSTRG.29294.7	NW_004973253.1 : 3907711 - 3910814	USP46	NW_004973253.1:3918387-3949543
MSTRG.29294.7	NW_004973253.1 : 3907711 - 3910814	RASL11B	NW_004973253.1:3869426-3872899
MSTRG.30251.4	NW_004973253.1 : 12485634 - 12509332	SEPSECS	NW_004973253.1:12584000-12609073
MSTRG.30251.4	NW_004973253.1 : 12485634 - 12509332	PI4K2B	NW_004973253.1:12559823-12583408
MSTRG.30251.4	NW_004973253.1 : 12485634 - 12509332	ZCCHC4	NW_004973253.1:12549314-12559648
MSTRG.30251.4	NW_004973253.1 : 12485634 - 12509332	ANAPC4	NW_004973253.1:12526918-12548353
MSTRG.30251.4	NW_004973253.1 : 12485634 - 12509332	SEL1L3	NW_004973253.1:12418691-12451002
MSTRG.28296.2	NW_004973252.1 : 4546850 - 4548058	LAMC2	NW_004973252.1:4625560-4646750
MSTRG.28296.2	NW_004973252.1 : 4546850 - 4548058	LAMC1	NW_004973252.1:4554964-4621128
MSTRG.28296.2	NW_004973252.1 : 4546850 - 4548058	SHCBP1L	NW_004973252.1:4537326-4545780
MSTRG.28296.2	NW_004973252.1 : 4546850 - 4548058	DHX9	NW_004973252.1:4509939-4536359
MSTRG.28296.2	NW_004973252.1 : 4546850 - 4548058	HEBP2	NW_004973252.1:4482689-4488857
MSTRG.28296.2	NW_004973252.1 : 4546850 - 4548058	NPL	NW_004973252.1:4479772-4512016
MSTRG.28296.2	NW_004973252.1 : 4546850 - 4548058	PIF1	NW_004973252.1:4472432-4477414
MSTRG.28296.2	NW_004973252.1 : 4546850 - 4548058	FAM183A	NW_004973252.1:4468131-4471317
MSTRG.28296.2	NW_004973252.1 : 4546850 - 4548058	EBNA1BP2	NW_004973252.1:4461286-4467899
MSTRG.28224.33	NW_004973252.1 : 3664722 - 3726740	IPO13	NW_004973252.1:3583454-3620238
MSTRG.28224.33	NW_004973252.1 : 3664722 - 3726740	DPH2	NW_004973252.1:3578981-3581275
MSTRG.28224.33	NW_004973252.1 : 3664722 - 3726740	ATP6V0B	NW_004973252.1:3571547-3575090
MSTRG.27215.99	NW_004973249.1 : 682017 - 692062	INTS9	NW_004973249.1:699864-788586
MSTRG.26782.29	NW_004973245.1 : 201638 - 207239	RNF152	NW_004973245.1:245633-283590
MSTRG.26782.31	NW_004973245.1 : 216557 - 218150	RNF152	NW_004973245.1:245633-283590
MSTRG.26782.33	NW_004973245.1 : 223174 - 225882	RNF152	NW_004973245.1:245633-283590
MSTRG.26082.32	NW_004973243.1 : 64474 - 67549	ING3	NW_004973243.1:18-13194
MSTRG.25880.43	NW_004973242.1 : 973908 - 987318	FHDC1	NW_004973242.1:920264-956471
MSTRG.25720.1	NW_004973242.1 : 37435 - 41287	CLDN23	NW_004973242.1:76260-77664
MSTRG.25742.1	NW_004973242.1 : 134212 - 135215	CLDN23	NW_004973242.1:76260-77664
MSTRG.25720.1	NW_004973242.1 : 37435 - 41287	LOC110357623	NW_004973242.1:67493-75485
MSTRG.25742.1	NW_004973242.1 : 134212 - 135215	LOC110357623	NW_004973242.1:67493-75485
MSTRG.25720.1	NW_004973242.1 : 37435 - 41287	LOC102086281	NW_004973242.1:62372-83096
MSTRG.25742.1	NW_004973242.1 : 134212 - 135215	LOC102086281	NW_004973242.1:62372-83096
MSTRG.25720.1	NW_004973242.1 : 37435 - 41287	PPP1R3B	NW_004973242.1:27950-33589
MSTRG.25742.1	NW_004973242.1 : 134212 - 135215	SH3D19	NW_004973242.1:142369-209654
MSTRG.25720.1	NW_004973242.1 : 37435 - 41287	RPS3A	NW_004973242.1:136478-139906
MSTRG.25742.1	NW_004973242.1 : 134212 - 135215	RPS3A	NW_004973242.1:136478-139906
MSTRG.25745.28	NW_004973242.1 : 187424 - 207971	RPS3A	NW_004973242.1:136478-139906
MSTRG.25720.1	NW_004973242.1 : 37435 - 41287	LOC102098159	NW_004973242.1:133654-134166
MSTRG.25742.1	NW_004973242.1 : 134212 - 135215	LOC102098159	NW_004973242.1:133654-134166
MSTRG.25745.28	NW_004973242.1 : 187424 - 207971	LOC102098159	NW_004973242.1:133654-134166
MSTRG.25720.1	NW_004973242.1 : 37435 - 41287	MBOAT4	NW_004973242.1:125419-128862
MSTRG.25742.1	NW_004973242.1 : 134212 - 135215	MBOAT4	NW_004973242.1:125419-128862
MSTRG.25745.28	NW_004973242.1 : 187424 - 207971	MBOAT4	NW_004973242.1:125419-128862
MSTRG.25720.1	NW_004973242.1 : 37435 - 41287	PRAG1	NW_004973242.1:102125-123779
MSTRG.25742.1	NW_004973242.1 : 134212 - 135215	PRAG1	NW_004973242.1:102125-123779
MSTRG.25745.28	NW_004973242.1 : 187424 - 207971	PRAG1	NW_004973242.1:102125-123779
MSTRG.25503.4	NW_004973238.1 : 480436 - 527373	OTUD1	NW_004973238.1:528439-530330
MSTRG.25511.1	NW_004973238.1 : 532306 - 535832	OTUD1	NW_004973238.1:528439-530330
MSTRG.25433.1	NW_004973237.1 : 2139516 - 2140366	FOXRED1	NW_004973237.1:2198750-2199991
MSTRG.25433.1	NW_004973237.1 : 2139516 - 2140366	DIXDC1	NW_004973237.1:2168521-2196353
MSTRG.25433.1	NW_004973237.1 : 2139516 - 2140366	CUNH11orf52	NW_004973237.1:2158710-2166965
MSTRG.25433.1	NW_004973237.1 : 2139516 - 2140366	HSPB2	NW_004973237.1:2153098-2154980
MSTRG.25433.1	NW_004973237.1 : 2139516 - 2140366	CRYAB	NW_004973237.1:2147801-2151368
MSTRG.25433.1	NW_004973237.1 : 2139516 - 2140366	FDXACB1	NW_004973237.1:2141380-2145187
MSTRG.25433.1	NW_004973237.1 : 2139516 - 2140366	ALG9	NW_004973237.1:2116274-2138902
MSTRG.25433.1	NW_004973237.1 : 2139516 - 2140366	SIK2	NW_004973237.1:2074687-2104123
MSTRG.25433.1	NW_004973237.1 : 2139516 - 2140366	LAYN	NW_004973237.1:2061063-2069644
MSTRG.25433.1	NW_004973237.1 : 2139516 - 2140366	CUNH11orf88	NW_004973237.1:2053404-2059818
MSTRG.25433.1	NW_004973237.1 : 2139516 - 2140366	BTG4	NW_004973237.1:2044982-2047428
MSTRG.24810.10	NW_004973236.1 : 576257 - 578239	ARID1A	NW_004973236.1:639168-677134
MSTRG.24661.2	NW_004973236.1 : 1 - 7031	EYA3	NW_004973236.1:63381-84674
MSTRG.24810.10	NW_004973236.1 : 576257 - 578239	PIGV	NW_004973236.1:628836-634910
MSTRG.24810.10	NW_004973236.1 : 576257 - 578239	ZDHHC18	NW_004973236.1:615826-625031
MSTRG.24810.10	NW_004973236.1 : 576257 - 578239	SFN	NW_004973236.1:611783-612828
MSTRG.24810.10	NW_004973236.1 : 576257 - 578239	GPN2	NW_004973236.1:602181-607302
MSTRG.24810.10	NW_004973236.1 : 576257 - 578239	GPATCH3	NW_004973236.1:596682-601242
MSTRG.24790.2	NW_004973236.1 : 456061 - 495167	NR0B2	NW_004973236.1:590859-593796
MSTRG.24810.10	NW_004973236.1 : 576257 - 578239	NR0B2	NW_004973236.1:590859-593796
MSTRG.24790.2	NW_004973236.1 : 456061 - 495167	NUDC	NW_004973236.1:581486-589500
MSTRG.24810.10	NW_004973236.1 : 576257 - 578239	NUDC	NW_004973236.1:581486-589500
MSTRG.24790.2	NW_004973236.1 : 456061 - 495167	KDF1	NW_004973236.1:568004-575893
MSTRG.24810.10	NW_004973236.1 : 576257 - 578239	KDF1	NW_004973236.1:568004-575893
MSTRG.24790.2	NW_004973236.1 : 456061 - 495167	SLC9A1	NW_004973236.1:502012-530715
MSTRG.24810.10	NW_004973236.1 : 576257 - 578239	SLC9A1	NW_004973236.1:502012-530715
MSTRG.24790.2	NW_004973236.1 : 456061 - 495167	SYTL1	NW_004973236.1:447155-451513
MSTRG.24790.2	NW_004973236.1 : 456061 - 495167	CD164L2	NW_004973236.1:440619-445586
MSTRG.24790.2	NW_004973236.1 : 456061 - 495167	GPR3	NW_004973236.1:436696-438809
MSTRG.24661.2	NW_004973236.1 : 1 - 7031	PTAFR	NW_004973236.1:42410-52284
MSTRG.24790.2	NW_004973236.1 : 456061 - 495167	WASF2	NW_004973236.1:398667-430657
MSTRG.24790.2	NW_004973236.1 : 456061 - 495167	AHDC1	NW_004973236.1:376059-413327
MSTRG.24790.2	NW_004973236.1 : 456061 - 495167	LOC110357554	NW_004973236.1:363472-365482
MSTRG.24661.2	NW_004973236.1 : 1 - 7031	DNAJC8	NW_004973236.1:32382-37974
MSTRG.24724.4	NW_004973236.1 : 232475 - 261360	FGR	NW_004973236.1:323466-328230
MSTRG.24724.4	NW_004973236.1 : 232475 - 261360	LOC102095936	NW_004973236.1:311673-317268
MSTRG.24724.4	NW_004973236.1 : 232475 - 261360	LOC102085199	NW_004973236.1:304698-309637
MSTRG.24661.2	NW_004973236.1 : 1 - 7031	ATPIF1	NW_004973236.1:30366-32280
MSTRG.24724.4	NW_004973236.1 : 232475 - 261360	FAM76A	NW_004973236.1:286344-297809
MSTRG.24724.4	NW_004973236.1 : 232475 - 261360	SESN2	NW_004973236.1:271657-278760
MSTRG.24724.4	NW_004973236.1 : 232475 - 261360	PHACTR4	NW_004973236.1:201003-216438
MSTRG.24724.4	NW_004973236.1 : 232475 - 261360	RCC1	NW_004973236.1:190548-200768
MSTRG.24724.4	NW_004973236.1 : 232475 - 261360	OPRD1	NW_004973236.1:177454-183933
MSTRG.24724.4	NW_004973236.1 : 232475 - 261360	TCEA3	NW_004973236.1:160585-167099
MSTRG.24724.4	NW_004973236.1 : 232475 - 261360	ASAP3	NW_004973236.1:144053-159047
MSTRG.24724.4	NW_004973236.1 : 232475 - 261360	E2F2	NW_004973236.1:138450-140429
MSTRG.24661.2	NW_004973236.1 : 1 - 7031	HNRNPR	NW_004973236.1:10485-23278
MSTRG.24613.2	NW_004973235.1 : 4816346 - 4846306	RELT	NW_004973235.1:4743928-4751599
MSTRG.24532.14	NW_004973235.1 : 4340813 - 4359330	RPS3	NW_004973235.1:4420856-4427707
MSTRG.24532.14	NW_004973235.1 : 4340813 - 4359330	SERPINH1	NW_004973235.1:4409750-4417617
MSTRG.24502.36	NW_004973235.1 : 3935971 - 3956373	MOGAT2	NW_004973235.1:4029962-4054981
MSTRG.24502.8	NW_004973235.1 : 3488838 - 3990395	MOGAT2	NW_004973235.1:4029962-4054981
MSTRG.24502.36	NW_004973235.1 : 3935971 - 3956373	DGAT2	NW_004973235.1:3983134-4009292
MSTRG.24469.1	NW_004973235.1 : 2733208 - 3649434	WNT11	NW_004973235.1:3659275-3687194
MSTRG.24502.8	NW_004973235.1 : 3488838 - 3990395	EMSY	NW_004973235.1:3442299-3481384
MSTRG.24492.1	NW_004973235.1 : 3106533 - 3150910	TSKU	NW_004973235.1:3151018-3171875
MSTRG.24469.4	NW_004973235.1 : 3106961 - 3169002	ACER3	NW_004973235.1:3031578-3101869
MSTRG.24492.1	NW_004973235.1 : 3106533 - 3150910	ACER3	NW_004973235.1:3031578-3101869
MSTRG.24469.1	NW_004973235.1 : 2733208 - 3649434	AQP11	NW_004973235.1:2656016-2669607
MSTRG.24469.1	NW_004973235.1 : 2733208 - 3649434	CLNS1A	NW_004973235.1:2639085-2652783
MSTRG.24407.81	NW_004973235.1 : 2298848 - 2474244	AAMDC	NW_004973235.1:2536271-2568058
MSTRG.24407.81	NW_004973235.1 : 2298848 - 2474244	INTS4	NW_004973235.1:2509523-2554432
MSTRG.24407.81	NW_004973235.1 : 2298848 - 2474244	KCTD14	NW_004973235.1:2500875-2506096
MSTRG.24407.81	NW_004973235.1 : 2298848 - 2474244	LOC102098334	NW_004973235.1:2490750-2492287
MSTRG.24407.81	NW_004973235.1 : 2298848 - 2474244	LOC102098156	NW_004973235.1:2486333-2487402
MSTRG.24407.81	NW_004973235.1 : 2298848 - 2474244	LOC102097981	NW_004973235.1:2482093-2483244
MSTRG.24407.81	NW_004973235.1 : 2298848 - 2474244	NARS2	NW_004973235.1:2234355-2289801
MSTRG.23544.1	NW_004973234.1 : 896240 - 899941	LOC102089613	NW_004973234.1:997199-998366
MSTRG.23544.1	NW_004973234.1 : 896240 - 899941	LOC102089428	NW_004973234.1:994456-994929
MSTRG.23544.1	NW_004973234.1 : 896240 - 899941	LOC102089728	NW_004973234.1:982736-992893
MSTRG.23544.1	NW_004973234.1 : 896240 - 899941	KIAA1210	NW_004973234.1:911330-953439
MSTRG.23514.1	NW_004973234.1 : 837731 - 838661	LONRF3	NW_004973234.1:875544-895344
MSTRG.23544.1	NW_004973234.1 : 896240 - 899941	LONRF3	NW_004973234.1:875544-895344
MSTRG.23514.1	NW_004973234.1 : 837731 - 838661	LOC102089167	NW_004973234.1:855052-869616
MSTRG.23544.1	NW_004973234.1 : 896240 - 899941	LOC102089167	NW_004973234.1:855052-869616
MSTRG.23514.1	NW_004973234.1 : 837731 - 838661	FAM199X	NW_004973234.1:839251-848719
MSTRG.23544.1	NW_004973234.1 : 896240 - 899941	FAM199X	NW_004973234.1:839251-848719
MSTRG.24025.1	NW_004973234.1 : 2941383 - 2945202	MBNL3	NW_004973234.1:2849256-2941148
MSTRG.22803.1	NW_004973229.1 : 910329 - 914995	LOC102093062	NW_004973229.1:857259-859702
MSTRG.21927.58	NW_004973228.1 : 464200 - 569847	LOC102089913	NW_004973228.1:411636-436062
MSTRG.21907.3	NW_004973228.1 : 296421 - 313793	KDM7A	NW_004973228.1:349003-390449
MSTRG.22393.1	NW_004973228.1 : 2882874 - 2884618	LOC102088970	NW_004973228.1:2913289-2944747
MSTRG.22393.1	NW_004973228.1 : 2882874 - 2884618	ATP6V1E1	NW_004973228.1:2884778-2898068
MSTRG.22393.1	NW_004973228.1 : 2882874 - 2884618	BCL2L13	NW_004973228.1:2837788-2877690
MSTRG.22393.1	NW_004973228.1 : 2882874 - 2884618	BID	NW_004973228.1:2815872-2837579
MSTRG.21907.3	NW_004973228.1 : 296421 - 313793	SLC37A3	NW_004973228.1:274265-296186
MSTRG.21907.3	NW_004973228.1 : 296421 - 313793	RAB19	NW_004973228.1:266260-271615
MSTRG.21907.3	NW_004973228.1 : 296421 - 313793	MKRN1	NW_004973228.1:248522-261784
MSTRG.21907.3	NW_004973228.1 : 296421 - 313793	LOC102089100	NW_004973228.1:203296-236227
MSTRG.21639.2	NW_004973227.1 : 3728913 - 3736141	HSD17B12	NW_004973227.1:3740597-3814547
MSTRG.19790.1	NW_004973223.1 : 134535 - 135986	SEC31B	NW_004973223.1:77365-107123
MSTRG.19790.1	NW_004973223.1 : 134535 - 135986	WNT8B	NW_004973223.1:60512-74141
MSTRG.20405.8	NW_004973223.1 : 4793893 - 4795743	LOC102092819	NW_004973223.1:4842750-4860698
MSTRG.20405.8	NW_004973223.1 : 4793893 - 4795743	NCOA4	NW_004973223.1:4830833-4838412
MSTRG.20405.8	NW_004973223.1 : 4793893 - 4795743	LOC102092156	NW_004973223.1:4775212-4785606
MSTRG.20405.8	NW_004973223.1 : 4793893 - 4795743	FAM35A	NW_004973223.1:4737223-4777499
MSTRG.20405.8	NW_004973223.1 : 4793893 - 4795743	GLUD1	NW_004973223.1:4707619-4724646
MSTRG.20206.12	NW_004973223.1 : 3189466 - 3235841	ZNF503	NW_004973223.1:3182648-3185903
MSTRG.19790.1	NW_004973223.1 : 134535 - 135986	HIF1AN	NW_004973223.1:119302-128367
MSTRG.19790.1	NW_004973223.1 : 134535 - 135986	NDUFB8	NW_004973223.1:113284-116757
MSTRG.19672.23	NW_004973222.1 : 976678 - 981012	MLH1	NW_004973222.1:923819-941104
MSTRG.19672.23	NW_004973222.1 : 976678 - 981012	STARD3NL	NW_004973222.1:886496-920118
MSTRG.19569.10	NW_004973222.1 : 80261 - 81879	KIAA0895	NW_004973222.1:86364-109547
MSTRG.19613.1	NW_004973222.1 : 617378 - 623922	LOC102091850	NW_004973222.1:690766-694277
MSTRG.19613.1	NW_004973222.1 : 617378 - 623922	LOC102095127	NW_004973222.1:645374-665720
MSTRG.19613.1	NW_004973222.1 : 617378 - 623922	LOC110357134	NW_004973222.1:627196-645237
MSTRG.19569.10	NW_004973222.1 : 80261 - 81879	ANLN	NW_004973222.1:126073-150470
MSTRG.19672.23	NW_004973222.1 : 976678 - 981012	DCLK3	NW_004973222.1:1052537-1066452
MSTRG.19569.10	NW_004973222.1 : 80261 - 81879	EEPD1	NW_004973222.1:10494-75371
MSTRG.19476.8	NW_004973221.1 : 1052872 - 1056166	AGA	NW_004973221.1:980985-1008741
MSTRG.18717.1	NW_004973218.1 : 334990 - 394190	GATA3	NW_004973218.1:428721-457477
MSTRG.18728.2	NW_004973218.1 : 382711 - 384909	GATA3	NW_004973218.1:428721-457477
MSTRG.18719.2	NW_004973218.1 : 345594 - 353526	TAF3	NW_004973218.1:374532-404175
MSTRG.18717.1	NW_004973218.1 : 334990 - 394190	ATP5C1	NW_004973218.1:263011-269506
MSTRG.18719.2	NW_004973218.1 : 345594 - 353526	ATP5C1	NW_004973218.1:263011-269506
MSTRG.18717.1	NW_004973218.1 : 334990 - 394190	KIN	NW_004973218.1:244571-260414
MSTRG.18390.2	NW_004973216.1 : 859059 - 867011	RRP15	NW_004973216.1:825496-846544
MSTRG.18269.3	NW_004973215.1 : 767148 - 786721	TGIF1	NW_004973215.1:688893-698615
MSTRG.18056.4	NW_004973213.1 : 702361 - 727788	CPA6	NW_004973213.1:635709-681746
MSTRG.17539.17	NW_004973212.1 : 701726 - 712933	PRICKLE1	NW_004973212.1:762669-778203
MSTRG.17545.11	NW_004973212.1 : 805851 - 814318	PRICKLE1	NW_004973212.1:762669-778203
MSTRG.17527.15	NW_004973212.1 : 646547 - 647866	ZCRB1	NW_004973212.1:674229-680995
MSTRG.17530.2	NW_004973212.1 : 616440 - 617483	ZCRB1	NW_004973212.1:674229-680995
MSTRG.17539.17	NW_004973212.1 : 701726 - 712933	ZCRB1	NW_004973212.1:674229-680995
MSTRG.17527.15	NW_004973212.1 : 646547 - 647866	YAF2	NW_004973212.1:606694-642067
MSTRG.17539.17	NW_004973212.1 : 701726 - 712933	YAF2	NW_004973212.1:606694-642067
MSTRG.17527.15	NW_004973212.1 : 646547 - 647866	GXYLT1	NW_004973212.1:567511-590416
MSTRG.17530.2	NW_004973212.1 : 616440 - 617483	GXYLT1	NW_004973212.1:567511-590416
MSTRG.17762.7	NW_004973212.1 : 2278823 - 2288229	SLC38A4	NW_004973212.1:2321715-2355738
MSTRG.17762.7	NW_004973212.1 : 2278823 - 2288229	SLC38A2	NW_004973212.1:2195738-2211746
MSTRG.17071.6	NW_004973211.1 : 2367949 - 2368551	ZNF330	NW_004973211.1:2374859-2392855
MSTRG.16825.13	NW_004973211.1 : 1149733 - 1150746	ANAPC10	NW_004973211.1:1192836-1228858
MSTRG.16825.13	NW_004973211.1 : 1149733 - 1150746	ABCE1	NW_004973211.1:1173127-1190058
MSTRG.16250.1	NW_004973209.1 : 142507 - 143112	MRAP2	NW_004973209.1:74072-99399
MSTRG.15997.1	NW_004973207.1 : 868934 - 872558	SRGAP1	NW_004973207.1:878771-918684
MSTRG.15997.1	NW_004973207.1 : 868934 - 872558	CUNH12orf66	NW_004973207.1:815496-825712
MSTRG.15997.1	NW_004973207.1 : 868934 - 872558	RPL18A	NW_004973207.1:809921-813534
MSTRG.15997.1	NW_004973207.1 : 868934 - 872558	XPOT	NW_004973207.1:779199-803827
MSTRG.15536.1	NW_004973203.1 : 3365966 - 3367691	LOC102098037	NW_004973203.1:3387095-3388026
MSTRG.15536.1	NW_004973203.1 : 3365966 - 3367691	PLGRKT	NW_004973203.1:3368741-3379044
MSTRG.15536.1	NW_004973203.1 : 3365966 - 3367691	LOC102094944	NW_004973203.1:3321944-3333093
MSTRG.15536.1	NW_004973203.1 : 3365966 - 3367691	LOC102094761	NW_004973203.1:3303169-3319026
MSTRG.15240.45	NW_004973202.1 : 439940 - 448911	ARL1	NW_004973202.1:528370-532250
MSTRG.15240.45	NW_004973202.1 : 439940 - 448911	NUP205	NW_004973202.1:483692-523804
MSTRG.15240.45	NW_004973202.1 : 439940 - 448911	LOC110356862	NW_004973202.1:479550-482687
MSTRG.15240.45	NW_004973202.1 : 439940 - 448911	CNOT4	NW_004973202.1:374329-420003
MSTRG.15216.2	NW_004973202.1 : 275419 - 277771	LOC102090564	NW_004973202.1:329255-353062
MSTRG.15216.2	NW_004973202.1 : 275419 - 277771	STRA8	NW_004973202.1:310613-325473
MSTRG.15216.2	NW_004973202.1 : 275419 - 277771	WDR91	NW_004973202.1:291972-310821
MSTRG.15216.2	NW_004973202.1 : 275419 - 277771	SCYL2	NW_004973202.1:222965-264295
MSTRG.15216.2	NW_004973202.1 : 275419 - 277771	SLC17A8	NW_004973202.1:182170-211222
MSTRG.13852.6	NW_004973200.1 : 919305 - 923487	LOC102093602	NW_004973200.1:992173-997543
MSTRG.13852.6	NW_004973200.1 : 919305 - 923487	BCL2L1	NW_004973200.1:975218-990375
MSTRG.13852.6	NW_004973200.1 : 919305 - 923487	TPX2	NW_004973200.1:959334-973121
MSTRG.13852.6	NW_004973200.1 : 919305 - 923487	MYLK2	NW_004973200.1:948136-953730
MSTRG.13852.6	NW_004973200.1 : 919305 - 923487	FOXS1	NW_004973200.1:942232-943449
MSTRG.13852.6	NW_004973200.1 : 919305 - 923487	DUSP15	NW_004973200.1:929959-941448
MSTRG.13852.6	NW_004973200.1 : 919305 - 923487	XKR7	NW_004973200.1:906574-913761
MSTRG.13852.6	NW_004973200.1 : 919305 - 923487	CCM2L	NW_004973200.1:900425-904725
MSTRG.13852.6	NW_004973200.1 : 919305 - 923487	HCK	NW_004973200.1:889641-898926
MSTRG.13852.6	NW_004973200.1 : 919305 - 923487	TM9SF4	NW_004973200.1:873066-884495
MSTRG.13852.6	NW_004973200.1 : 919305 - 923487	PLAGL2	NW_004973200.1:860796-868032
MSTRG.13852.6	NW_004973200.1 : 919305 - 923487	KIF3B	NW_004973200.1:844833-854617
MSTRG.13852.6	NW_004973200.1 : 919305 - 923487	POFUT1	NW_004973200.1:840792-865353
MSTRG.13852.6	NW_004973200.1 : 919305 - 923487	ASXL1	NW_004973200.1:828926-839596
MSTRG.14967.3	NW_004973200.1 : 8040135 - 8114146	EIF2S2	NW_004973200.1:8161462-8168892
MSTRG.14967.3	NW_004973200.1 : 8040135 - 8114146	LOC102088783	NW_004973200.1:8141291-8149559
MSTRG.14967.3	NW_004973200.1 : 8040135 - 8114146	CEBPB	NW_004973200.1:8128091-8129346
MSTRG.14967.3	NW_004973200.1 : 8040135 - 8114146	PTPN1	NW_004973200.1:7943972-7957077
MSTRG.14928.8	NW_004973200.1 : 7817324 - 7845378	RIPOR3	NW_004973200.1:7894910-7941173
MSTRG.14928.8	NW_004973200.1 : 7817324 - 7845378	PARD6B	NW_004973200.1:7858560-7872544
MSTRG.14928.8	NW_004973200.1 : 7817324 - 7845378	DPM1	NW_004973200.1:7772385-7781682
MSTRG.14928.8	NW_004973200.1 : 7817324 - 7845378	MOCS3	NW_004973200.1:7769346-7771401
MSTRG.14928.8	NW_004973200.1 : 7817324 - 7845378	KCNG1	NW_004973200.1:7747238-7754929
MSTRG.14871.1	NW_004973200.1 : 6824814 - 6826250	ZNF217	NW_004973200.1:6785724-6811419
MSTRG.14034.3	NW_004973200.1 : 1517748 - 1520478	UCKL1	NW_004973200.1:1597239-1615350
MSTRG.14034.3	NW_004973200.1 : 1517748 - 1520478	DNAJC5	NW_004973200.1:1568542-1576911
MSTRG.14034.3	NW_004973200.1 : 1517748 - 1520478	TPD52L2	NW_004973200.1:1541303-1556771
MSTRG.14034.3	NW_004973200.1 : 1517748 - 1520478	ZBTB46	NW_004973200.1:1472005-1516608
MSTRG.14034.3	NW_004973200.1 : 1517748 - 1520478	LIME1	NW_004973200.1:1444502-1451278
MSTRG.14034.3	NW_004973200.1 : 1517748 - 1520478	ZGPAT	NW_004973200.1:1435474-1444331
MSTRG.14034.3	NW_004973200.1 : 1517748 - 1520478	ARFRP1	NW_004973200.1:1425164-1436265
MSTRG.13852.6	NW_004973200.1 : 919305 - 923487	REM1	NW_004973200.1:1018159-1021316
MSTRG.13852.6	NW_004973200.1 : 919305 - 923487	HM13	NW_004973200.1:1004359-1014279
MSTRG.13608.16	NW_004973199.1 : 8839626 - 8848154	MRPL53	NW_004973199.1:8756585-8760232
MSTRG.13608.16	NW_004973199.1 : 8839626 - 8848154	LOC102093242	NW_004973199.1:8740178-8754955
MSTRG.12874.1	NW_004973199.1 : 4119847 - 4130049	FAM92A	NW_004973199.1:4072478-4093404
MSTRG.12874.1	NW_004973199.1 : 4119847 - 4130049	RBM12B	NW_004973199.1:4062858-4069209
MSTRG.12874.1	NW_004973199.1 : 4119847 - 4130049	TMEM67	NW_004973199.1:4027889-4062397
MSTRG.11998.13	NW_004973198.1 : 9466691 - 9477206	TCP11L1	NW_004973198.1:9551079-9567683
MSTRG.11998.13	NW_004973198.1 : 9466691 - 9477206	CSTF3	NW_004973198.1:9502543-9551090
MSTRG.11880.1	NW_004973198.1 : 8184243 - 8202509	BTBD10	NW_004973198.1:8271562-8301182
MSTRG.11880.1	NW_004973198.1 : 8184243 - 8202509	ARNTL	NW_004973198.1:8216674-8271257
MSTRG.11880.1	NW_004973198.1 : 8184243 - 8202509	LOC110365176	NW_004973198.1:8133756-8135143
MSTRG.11880.1	NW_004973198.1 : 8184243 - 8202509	LOC110365170	NW_004973198.1:8130866-8133732
MSTRG.11814.45	NW_004973198.1 : 7684547 - 7702343	DKK3	NW_004973198.1:7586263-7613098
MSTRG.11309.16	NW_004973198.1 : 3003833 - 3073632	LOC110365547	NW_004973198.1:2907692-2983280
MSTRG.11253.1	NW_004973198.1 : 2726676 - 2728074	TPH1	NW_004973198.1:2680825-2705323
MSTRG.11253.1	NW_004973198.1 : 2726676 - 2728074	SAAL1	NW_004973198.1:2667221-2676736
MSTRG.11253.1	NW_004973198.1 : 2726676 - 2728074	LOC102095374	NW_004973198.1:2664726-2666537
MSTRG.11253.1	NW_004973198.1 : 2726676 - 2728074	HPS5	NW_004973198.1:2636610-2658204
MSTRG.12148.2	NW_004973198.1 : 11843299 - 11896519	FIBIN	NW_004973198.1:11912548-11913054
MSTRG.12148.2	NW_004973198.1 : 11843299 - 11896519	CCDC34	NW_004973198.1:11770385-11788669
MSTRG.7541.1	NW_004973192.1 : 6891258 - 6907269	NR5A2	NW_004973192.1:6911805-6995278
MSTRG.7541.1	NW_004973192.1 : 6891258 - 6907269	ZNF281	NW_004973192.1:6829635-6834260
MSTRG.6700.5	NW_004973192.1 : 276735 - 624228	GTF2B	NW_004973192.1:682587-707503
MSTRG.7510.4	NW_004973192.1 : 6501110 - 6502674	GPSM2	NW_004973192.1:6578064-6597547
MSTRG.7510.4	NW_004973192.1 : 6501110 - 6502674	AKNAD1	NW_004973192.1:6547176-6567854
MSTRG.7510.4	NW_004973192.1 : 6501110 - 6502674	STXBP3	NW_004973192.1:6530970-6554852
MSTRG.7510.4	NW_004973192.1 : 6501110 - 6502674	FNDC7	NW_004973192.1:6513468-6530847
MSTRG.6700.5	NW_004973192.1 : 276735 - 624228	PKN2	NW_004973192.1:648612-679792
MSTRG.7510.4	NW_004973192.1 : 6501110 - 6502674	FAM102B	NW_004973192.1:6449301-6478238
MSTRG.7510.4	NW_004973192.1 : 6501110 - 6502674	SLC25A24	NW_004973192.1:6420893-6463641
MSTRG.7035.1	NW_004973192.1 : 2742652 - 2749699	RWDD3	NW_004973192.1:2700682-2709203
MSTRG.7035.1	NW_004973192.1 : 2742652 - 2749699	LOC102098938	NW_004973192.1:2684826-2691427
MSTRG.9220.3	NW_004973192.1 : 17297959 - 17299861	ERICH3	NW_004973192.1:17372373-17396110
MSTRG.9220.3	NW_004973192.1 : 17297959 - 17299861	LOC102085368	NW_004973192.1:17314562-17368772
MSTRG.9220.3	NW_004973192.1 : 17297959 - 17299861	LOC110363673	NW_004973192.1:17212755-17216579
MSTRG.8742.37	NW_004973192.1 : 13968533 - 13971273	LOC102089036	NW_004973192.1:13992586-14014756
MSTRG.8742.38	NW_004973192.1 : 13968980 - 13971423	LOC102089036	NW_004973192.1:13992586-14014756
MSTRG.8742.37	NW_004973192.1 : 13968533 - 13971273	LOC102093649	NW_004973192.1:13949471-13968097
MSTRG.8742.38	NW_004973192.1 : 13968980 - 13971423	LOC102093649	NW_004973192.1:13949471-13968097
MSTRG.8742.37	NW_004973192.1 : 13968533 - 13971273	LOC102094339	NW_004973192.1:13938286-13955100
MSTRG.8742.38	NW_004973192.1 : 13968980 - 13971423	LOC102094339	NW_004973192.1:13938286-13955100
MSTRG.5236.2	NW_004973189.1 : 924633 - 926259	WDR37	NW_004973189.1:840129-890597
MSTRG.5236.2	NW_004973189.1 : 924633 - 926259	LOC102097071	NW_004973189.1:831148-837120
MSTRG.5215.1	NW_004973189.1 : 696512 - 700315	LARP4B	NW_004973189.1:701673-731348
MSTRG.4691.35	NW_004973187.1 : 4045013 - 4050728	LETM1	NW_004973187.1:4097828-4124248
MSTRG.4691.35	NW_004973187.1 : 4045013 - 4050728	LOC110359450	NW_004973187.1:3974331-3986503
MSTRG.4311.3	NW_004973187.1 : 212178 - 213902	KIAA0232	NW_004973187.1:236826-287057
MSTRG.4311.3	NW_004973187.1 : 212178 - 213902	S100P	NW_004973187.1:173942-177042
MSTRG.4311.3	NW_004973187.1 : 212178 - 213902	LOC110359065	NW_004973187.1:153683-163298
MSTRG.4311.3	NW_004973187.1 : 212178 - 213902	MAN2B2	NW_004973187.1:115770-146969
MSTRG.4137.1	NW_004973186.1 : 15534 - 21969	LOC102086702	NW_004973186.1:49929-83251
MSTRG.4137.3	NW_004973186.1 : 17901 - 20495	LOC102086702	NW_004973186.1:49929-83251
MSTRG.3987.1	NW_004973184.1 : 2093077 - 2096992	TNFSF15	NW_004973184.1:2167317-2180719
MSTRG.3987.1	NW_004973184.1 : 2093077 - 2096992	LOC102098094	NW_004973184.1:2117923-2135285
MSTRG.3987.1	NW_004973184.1 : 2093077 - 2096992	TNC	NW_004973184.1:1999706-2092599
MSTRG.3547.15	NW_004973183.1 : 916814 - 922874	ANKRD29	NW_004973183.1:933374-963413
MSTRG.3530.30	NW_004973183.1 : 812782 - 818759	NPC1	NW_004973183.1:894810-916161
MSTRG.3547.15	NW_004973183.1 : 916814 - 922874	NPC1	NW_004973183.1:894810-916161
MSTRG.3530.30	NW_004973183.1 : 812782 - 818759	CUNH18orf8	NW_004973183.1:881723-894904
MSTRG.3547.15	NW_004973183.1 : 916814 - 922874	CUNH18orf8	NW_004973183.1:881723-894904
MSTRG.3530.30	NW_004973183.1 : 812782 - 818759	RIOK3	NW_004973183.1:862346-875047
MSTRG.3547.15	NW_004973183.1 : 916814 - 922874	RIOK3	NW_004973183.1:862346-875047
MSTRG.3530.30	NW_004973183.1 : 812782 - 818759	CABLES1	NW_004973183.1:752209-792143
MSTRG.3204.1	NW_004973182.1 : 6267477 - 6270974	SFSWAP	NW_004973182.1:6279152-6310063
MSTRG.3077.1	NW_004973182.1 : 5867298 - 5869274	RAN	NW_004973182.1:5951424-5955136
MSTRG.3078.1	NW_004973182.1 : 5872102 - 5875344	RAN	NW_004973182.1:5951424-5955136
MSTRG.3079.1	NW_004973182.1 : 5882932 - 5885170	RAN	NW_004973182.1:5951424-5955136
MSTRG.3077.1	NW_004973182.1 : 5867298 - 5869274	STX2	NW_004973182.1:5930237-5940742
MSTRG.3078.1	NW_004973182.1 : 5872102 - 5875344	STX2	NW_004973182.1:5930237-5940742
MSTRG.3079.1	NW_004973182.1 : 5882932 - 5885170	STX2	NW_004973182.1:5930237-5940742
MSTRG.3077.1	NW_004973182.1 : 5867298 - 5869274	LOC110357222	NW_004973182.1:5917560-5925314
MSTRG.3078.1	NW_004973182.1 : 5872102 - 5875344	LOC110357222	NW_004973182.1:5917560-5925314
MSTRG.3079.1	NW_004973182.1 : 5882932 - 5885170	LOC110357222	NW_004973182.1:5917560-5925314
MSTRG.3077.1	NW_004973182.1 : 5867298 - 5869274	PIWIL1	NW_004973182.1:5796093-5812679
MSTRG.3078.1	NW_004973182.1 : 5872102 - 5875344	PIWIL1	NW_004973182.1:5796093-5812679
MSTRG.3079.1	NW_004973182.1 : 5882932 - 5885170	PIWIL1	NW_004973182.1:5796093-5812679
MSTRG.2732.1	NW_004973182.1 : 3707298 - 3709362	ABCB9	NW_004973182.1:3794129-3808744
MSTRG.2732.1	NW_004973182.1 : 3707298 - 3709362	VPS37B	NW_004973182.1:3774220-3780350
MSTRG.2732.1	NW_004973182.1 : 3707298 - 3709362	HIP1R	NW_004973182.1:3756238-3771387
MSTRG.2732.1	NW_004973182.1 : 3707298 - 3709362	CCDC62	NW_004973182.1:3736854-3750860
MSTRG.2732.1	NW_004973182.1 : 3707298 - 3709362	GPN3	NW_004973182.1:3723167-3727113
MSTRG.2732.1	NW_004973182.1 : 3707298 - 3709362	ARPC3	NW_004973182.1:3717260-3722065
MSTRG.2732.1	NW_004973182.1 : 3707298 - 3709362	DENR	NW_004973182.1:3716387-3735262
MSTRG.2732.1	NW_004973182.1 : 3707298 - 3709362	ANAPC7	NW_004973182.1:3709784-3715353
MSTRG.2732.1	NW_004973182.1 : 3707298 - 3709362	ATP2A2	NW_004973182.1:3661905-3702847
MSTRG.2688.1	NW_004973182.1 : 3487189 - 3488802	CAMKK2	NW_004973182.1:3563401-3572893
MSTRG.2688.1	NW_004973182.1 : 3487189 - 3488802	ANAPC5	NW_004973182.1:3544913-3557129
MSTRG.2688.1	NW_004973182.1 : 3487189 - 3488802	RNF34	NW_004973182.1:3531681-3537312
MSTRG.2663.23	NW_004973182.1 : 3353109 - 3355120	LOC102084694	NW_004973182.1:3450798-3454032
MSTRG.2680.20	NW_004973182.1 : 3429235 - 3431900	LOC102084694	NW_004973182.1:3450798-3454032
MSTRG.2688.1	NW_004973182.1 : 3487189 - 3488802	LOC102084694	NW_004973182.1:3450798-3454032
MSTRG.2663.23	NW_004973182.1 : 3353109 - 3355120	ORAI1	NW_004973182.1:3410238-3424211
MSTRG.2680.20	NW_004973182.1 : 3429235 - 3431900	ORAI1	NW_004973182.1:3410238-3424211
MSTRG.2688.1	NW_004973182.1 : 3487189 - 3488802	ORAI1	NW_004973182.1:3410238-3424211
MSTRG.2663.23	NW_004973182.1 : 3353109 - 3355120	MORN3	NW_004973182.1:3382189-3407211
MSTRG.2680.20	NW_004973182.1 : 3429235 - 3431900	MORN3	NW_004973182.1:3382189-3407211
MSTRG.2663.23	NW_004973182.1 : 3353109 - 3355120	TMEM120B	NW_004973182.1:3379704-3392216
MSTRG.2680.20	NW_004973182.1 : 3429235 - 3431900	TMEM120B	NW_004973182.1:3379704-3392216
MSTRG.2663.23	NW_004973182.1 : 3353109 - 3355120	RHOF	NW_004973182.1:3372904-3378533
MSTRG.2680.20	NW_004973182.1 : 3429235 - 3431900	RHOF	NW_004973182.1:3372904-3378533
MSTRG.2663.23	NW_004973182.1 : 3353109 - 3355120	SETD1B	NW_004973182.1:3305916-3352448
MSTRG.2663.23	NW_004973182.1 : 3353109 - 3355120	HPD	NW_004973182.1:3298417-3304453
MSTRG.2663.23	NW_004973182.1 : 3353109 - 3355120	PSMD9	NW_004973182.1:3294248-3297523
MSTRG.2663.23	NW_004973182.1 : 3353109 - 3355120	WDR66	NW_004973182.1:3274917-3292471
MSTRG.2663.23	NW_004973182.1 : 3353109 - 3355120	BCL7A	NW_004973182.1:3254696-3269901
MSTRG.1826.20	NW_004973180.1 : 1778736 - 1801202	NRBF2	NW_004973180.1:1893083-1899491
MSTRG.1393.3	NW_004973179.1 : 2077907 - 2081294	BCAP29	NW_004973179.1:2143038-2165839
MSTRG.1393.3	NW_004973179.1 : 2077907 - 2081294	DUS4L	NW_004973179.1:2123491-2139445
MSTRG.1393.3	NW_004973179.1 : 2077907 - 2081294	GPR22	NW_004973179.1:2085929-2091547
MSTRG.1303.1	NW_004973179.1 : 1485279 - 1522379	NAMPT	NW_004973179.1:1563125-1590418
MSTRG.1303.2	NW_004973179.1 : 1485279 - 1521563	NAMPT	NW_004973179.1:1563125-1590418
MSTRG.1337.1	NW_004973179.1 : 1637113 - 1648918	NAMPT	NW_004973179.1:1563125-1590418
MSTRG.1303.1	NW_004973179.1 : 1485279 - 1522379	SYPL1	NW_004973179.1:1527749-1533062
MSTRG.1303.2	NW_004973179.1 : 1485279 - 1521563	SYPL1	NW_004973179.1:1527749-1533062
MSTRG.856.1	NW_004973177.1 : 1685889 - 1686579	SNCA	NW_004973177.1:1699375-1749766
MSTRG.856.1	NW_004973177.1 : 1685889 - 1686579	HPGDS	NW_004973177.1:1655678-1679941
MSTRG.856.1	NW_004973177.1 : 1685889 - 1686579	LOC102093831	NW_004973177.1:1606277-1634003
MSTRG.81.6	NW_004973173.1 : 326320 - 329275	FBXL7	NW_004973173.1:307250-315946
MSTRG.101373.1	NW_004973535.1 : 140879 - 144565	LOC102092852	NA
MSTRG.101373.1	NW_004973535.1 : 140879 - 144565	LOC102093035	NA
MSTRG.101373.2	NW_004973535.1 : 140893 - 142461	LOC102092852	NA
MSTRG.101373.2	NW_004973535.1 : 140893 - 142461	LOC102093035	NA
MSTRG.102521.9	NW_004973541.1 : 526985 - 527486	LOC102098612	NA
MSTRG.115511.64	NW_004973640.1 : 1961142 - 1962333	IL21	NA
MSTRG.115511.64	NW_004973640.1 : 1961142 - 1962333	LOC102091580	NA
MSTRG.115537.2	NW_004973640.1 : 2113732 - 2125409	IL21	NA
MSTRG.118226.1	NW_004973670.1 : 31215 - 32363	LOC102085877	NA
MSTRG.119139.1	NW_004973678.1 : 2899401 - 3065741	LOC110365137	NA
MSTRG.119139.1	NW_004973678.1 : 2899401 - 3065741	LOC110365148	NA
MSTRG.139032.1	NW_004973886.1 : 2813320 - 2815136	LOC110355241	NA
MSTRG.139385.3	NW_004973891.1 : 153779 - 155922	2021-03-02	NA
MSTRG.140649.1	NW_004973922.1 : 99657 - 100306	CUNH7orf31	NA
MSTRG.143526.1	NW_004974009.1 : 1040013 - 1040472	PRDM12	NA
MSTRG.17071.6	NW_004973211.1 : 2367949 - 2368551	LOC110356982	NA
MSTRG.24661.2	NW_004973236.1 : 1 - 7031	XKR8	NA
MSTRG.24790.2	NW_004973236.1 : 456061 - 495167	FAM46B	NA
MSTRG.24810.10	NW_004973236.1 : 576257 - 578239	FAM46B	NA
MSTRG.25503.4	NW_004973238.1 : 480436 - 527373	MSRB2	NA
MSTRG.43799.1	NW_004973278.1 : 2448209 - 2448922	LOC102088614	NA
MSTRG.47127.2	NW_004973290.1 : 160921 - 448641	MSX2	NA
MSTRG.47152.1	NW_004973290.1 : 695632 - 698426	LOC106145706	NA
MSTRG.52159.2	NW_004973302.1 : 222020 - 224310	FZD5	NA
MSTRG.56972.4	NW_004973324.1 : 3445923 - 3449718	GRIFIN	NA
MSTRG.61406.8	NW_004973337.1 : 3386661 - 3710423	LOC110360572	NA
MSTRG.73345.87	NW_004973393.1 : 1429287 - 1483239	SIX6	NA
MSTRG.81.6	NW_004973173.1 : 326320 - 329275	MARCH11	NA
MSTRG.82779.33	NW_004973426.1 : 355153 - 431147	LOC110362391	NA
MSTRG.82779.33	NW_004973426.1 : 355153 - 431147	LOC110362395	NA
MSTRG.82779.38	NW_004973426.1 : 365478 - 420436	LOC110362391	NA
MSTRG.82779.38	NW_004973426.1 : 365478 - 420436	LOC110362395	NA
MSTRG.84601.26	NW_004973436.1 : 93412 - 94312	LOC102091567	NA
MSTRG.84605.1	NW_004973436.1 : 74045 - 222251	LOC102091567	NA
MSTRG.84605.1	NW_004973436.1 : 74045 - 222251	LOC102092660	NA
MSTRG.84610.1	NW_004973436.1 : 108334 - 167713	LOC102091567	NA
MSTRG.84612.1	NW_004973436.1 : 113106 - 161245	LOC102091567	NA
MSTRG.9220.3	NW_004973192.1 : 17297959 - 17299861	FPGT	NA
MSTRG.94909.1	NW_004973488.1 : 3717341 - 3722937	ATF7IP2	NA
MSTRG.98291.5	NW_004973510.1 : 1212516 - 1216181	PET117	NA

## Sheet: Supplementary Table S3b
Table S3b The predicted target genes of DE-lncRNA by trans in N vs. S birds
LncRNA	Gene	coefficient	Pvalue
MSTRG.100603.49	AMPH	0.941655	1.51e-05
MSTRG.101075.1	ADGRV1	0.926104	4.26e-05
MSTRG.101548.1	ALCAM	-0.928371	3.72e-05
MSTRG.102499.2	ADAM10	0.90492	0.000128413
MSTRG.102499.2	AEBP2	0.936715	2.15e-05
MSTRG.102521.9	AMIGO2	0.912951	8.74e-05
MSTRG.105256.45	AEBP2	0.946913	9.92e-06
MSTRG.105256.66	ABHD12B	0.927131	4.01e-05
MSTRG.105256.66	ABHD6	0.929808	3.4e-05
MSTRG.105256.66	ABI3	0.962779	2.05e-06
MSTRG.107262.2	AFMID	0.902593	0.000142685
MSTRG.108069.1	ABI3	0.941041	1.58e-05
MSTRG.108069.1	ADRB3	0.932334	2.89e-05
MSTRG.109100.3	AMER3	0.92956	3.45e-05
MSTRG.109336.2	ABCC1	0.90601	0.000122118
MSTRG.109336.2	ALKBH8	-0.91624	7.38e-05
MSTRG.109646.1	ACOT8	-0.91135	9.46e-05
MSTRG.109646.2	ADAM10	0.925421	4.44e-05
MSTRG.109646.2	AEBP2	0.92298	5.11e-05
MSTRG.110543.1	ACAT2	0.900185	0.000158684
MSTRG.111826.25	ABCC2	0.925786	4.34e-05
MSTRG.112163.2	ABCA3	0.918511	6.54e-05
MSTRG.112163.2	ACAA1	0.911711	9.29e-05
MSTRG.113663.11	AEBP2	0.921405	5.59e-05
MSTRG.113738.1	ADTRP	0.904128	0.00013314
MSTRG.113738.1	AMPD3	0.919758	6.12e-05
MSTRG.114342.3	ANGPTL2	-0.956372	4.16e-06
MSTRG.114543.1	ADCY8	0.908054	0.000110953
MSTRG.114543.1	AFMID	0.95589	4.37e-06
MSTRG.114731.5	AATF	0.908844	0.000106849
MSTRG.114849.42	ABI3	0.97773	2.08e-07
MSTRG.114849.42	ANGPT1	0.915188	7.8e-05
MSTRG.114923.1	ADGRV1	0.93033	3.29e-05
MSTRG.115562.1	ADAMTSL5	0.915302	7.75e-05
MSTRG.115662.9	AMIGO2	0.922989	5.11e-05
MSTRG.116271.2	AK9	0.96433	1.7e-06
MSTRG.117449.2	ALYREF	0.924915	4.57e-05
MSTRG.118204.1	ACP1	0.905639	0.000124237
MSTRG.118226.1	ADAMTS10	0.920025	6.03e-05
MSTRG.121917.1	ADGRV1	0.948783	8.46e-06
MSTRG.125629.5	AEBP2	0.900258	0.000158181
MSTRG.125734.1	ANKLE1	0.907331	0.00011481
MSTRG.126530.14	ACVR2A	0.92044	5.89e-05
MSTRG.126530.14	AGT	0.925541	4.41e-05
MSTRG.126530.14	AMPD3	0.912946	8.74e-05
MSTRG.126598.23	AK7	0.906827	0.000117557
MSTRG.127627.1	AMFR	0.906972	0.000116763
MSTRG.130197.1	AKTIP	0.923322	5.01e-05
MSTRG.130197.1	AMPH	0.933963	2.6e-05
MSTRG.131288.55	AKAP13	0.915603	7.63e-05
MSTRG.131825.13	ABI3	0.96438	1.69e-06
MSTRG.131825.13	ADRB3	0.900503	0.000156496
MSTRG.131825.13	ANGPT1	0.923992	4.82e-05
MSTRG.132501.4	ABCC2	0.94654	1.02e-05
MSTRG.132865.10	AMPH	0.928569	3.67e-05
MSTRG.133113.1	AK9	0.932895	2.79e-05
MSTRG.133135.11	AKTIP	0.924339	4.73e-05
MSTRG.133456.1	AEBP2	0.95245	6.09e-06
MSTRG.133478.20	A1CF	0.95729	3.78e-06
MSTRG.133478.20	ACTN2	0.900075	0.000159451
MSTRG.133478.20	AHSG	0.918043	6.71e-05
MSTRG.133478.20	AMDHD1	0.904877	0.000128667
MSTRG.135930.17	AKAP14	0.948135	8.95e-06
MSTRG.136018.22	AKAP6	0.901956	0.00014679
MSTRG.13852.6	ABCC2	0.920334	5.93e-05
MSTRG.139896.9	ADORA3	0.901873	0.000147333
MSTRG.142573.14	ADGRV1	0.919496	6.21e-05
MSTRG.142735.28	ANKLE1	0.932613	2.84e-05
MSTRG.143673.21	A1CF	0.928551	3.68e-05
MSTRG.143673.21	AHSG	0.958562	3.31e-06
MSTRG.143673.21	ALB	0.946848	9.97e-06
MSTRG.143673.21	AMBP	0.929567	3.45e-05
MSTRG.143749.62	ACAP3	-0.920704	5.81e-05
MSTRG.144940.14	AKAP14	0.92348	4.97e-05
MSTRG.146389.19	AK9	0.926411	4.18e-05
MSTRG.146473.1	ACACB	0.941141	1.57e-05
MSTRG.147297.12	AK7	0.90238	0.00014405
MSTRG.148853.1	ANGEL1	0.929311	3.51e-05
MSTRG.14928.8	AMPD1	0.912272	9.04e-05
MSTRG.149308.4	AEBP2	0.947659	9.32e-06
MSTRG.149627.2	ACLY	0.948045	9.02e-06
MSTRG.149862.3	ACAT2	0.914433	8.1e-05
MSTRG.149862.3	ACTL7A	0.923765	4.89e-05
MSTRG.149862.3	AKAP14	0.941097	1.57e-05
MSTRG.150645.41	AKTIP	0.903806	0.000135101
MSTRG.150645.41	AMPH	0.92314	5.06e-05
MSTRG.152224.1	A4GNT	0.911895	9.21e-05
MSTRG.152224.1	AIRE	0.913188	8.63e-05
MSTRG.152224.1	ALB	0.905254	0.00012646
MSTRG.156449.3	ABI3	0.926218	4.23e-05
MSTRG.156449.3	ANGPT1	0.941141	1.57e-05
MSTRG.157134.2	ADAM10	0.915798	7.55e-05
MSTRG.157134.2	AEBP2	0.945529	1.11e-05
MSTRG.157134.3	ABI3	0.917614	6.87e-05
MSTRG.157134.3	ADRB3	0.940286	1.67e-05
MSTRG.17539.17	ACAT2	0.943458	1.31e-05
MSTRG.17539.17	ACTL7A	0.931137	3.13e-05
MSTRG.17539.17	ADGB	0.917017	7.09e-05
MSTRG.17539.17	AKAP14	0.920787	5.78e-05
MSTRG.17703.16	ABI3	0.987464	1.59e-08
MSTRG.17703.16	ADCY5	0.904558	0.000130559
MSTRG.17703.16	ADRB3	0.930363	3.28e-05
MSTRG.17703.16	ANGPT1	0.926894	4.07e-05
MSTRG.17762.7	ABCG4	0.918375	6.59e-05
MSTRG.17762.7	ACOD1	0.972456	5.37e-07
MSTRG.17762.7	ACVR2A	0.909902	0.000101541
MSTRG.17762.7	ADAM33	0.911594	9.35e-05
MSTRG.17762.7	ADTRP	0.938493	1.9e-05
MSTRG.17762.7	ALKBH5	0.903299	0.00013823
MSTRG.17762.7	AMPD3	0.949024	8.29e-06
MSTRG.17762.7	ANKRD1	0.909585	0.000103109
MSTRG.18269.3	AGR3	0.939766	1.73e-05
MSTRG.18390.2	A4GNT	0.909126	0.000105417
MSTRG.18390.2	AIRE	0.927145	4e-05
MSTRG.18717.1	ADGRG6	0.934205	2.56e-05
MSTRG.19476.8	ABRAXAS2	-0.904968	0.000128134
MSTRG.19613.1	AKAIN1	0.914516	8.07e-05
MSTRG.19984.1	ABCC2	0.923723	4.9e-05
MSTRG.21486.1	ADGRG6	0.905206	0.00012674
MSTRG.23514.1	AMBP	0.914316	8.15e-05
MSTRG.24262.18	AK9	0.970328	7.49e-07
MSTRG.24469.1	ADGRV1	0.911436	9.42e-05
MSTRG.24502.8	AEBP2	0.934792	2.46e-05
MSTRG.24790.2	AMPH	0.928124	3.77e-05
MSTRG.25511.1	ADCY1	-0.923999	4.82e-05
MSTRG.25720.1	AES	-0.93027	3.3e-05
MSTRG.25742.1	ADAMTS10	0.918335	6.61e-05
MSTRG.26082.32	ACOT11	0.942829	1.38e-05
MSTRG.2688.1	ADGRV1	0.944266	1.23e-05
MSTRG.28224.33	AFAP1L2	0.986264	2.39e-08
MSTRG.30251.4	ADAM10	0.907831	0.00011213
MSTRG.30251.4	AEBP2	0.954314	5.1e-06
MSTRG.31655.5	ABCC4	0.902802	0.000141352
MSTRG.32487.2	ACOT12	0.917616	6.87e-05
MSTRG.3338.5	ADTRP	0.904185	0.000132798
MSTRG.3338.5	ALKAL2	0.911532	9.38e-05
MSTRG.3338.5	ANKRD1	0.910149	0.000100332
MSTRG.34052.1	AFMID	0.920561	5.85e-05
MSTRG.34377.1	ACAT2	0.916932	7.12e-05
MSTRG.34377.1	ACSM3	0.901181	0.000151911
MSTRG.34377.1	AKAP14	0.906741	0.000118034
MSTRG.35016.6	AK9	0.93021	3.32e-05
MSTRG.3530.30	AATF	0.90906	0.000105752
MSTRG.35971.4	AKAP7	-0.931228	3.11e-05
MSTRG.3987.1	ACAN	0.941537	1.52e-05
MSTRG.40182.1	ANGEL1	0.920506	5.87e-05
MSTRG.41962.20	ANGPTL2	-0.900074	0.000159457
MSTRG.42038.27	ABCC2	0.903879	0.000134657
MSTRG.42038.28	AMER3	0.910431	9.9e-05
MSTRG.42330.1	ADGRV1	0.93191	2.97e-05
MSTRG.42536.22	ANGPT1	0.926408	4.19e-05
MSTRG.42608.1	AK9	0.961925	2.27e-06
MSTRG.42668.10	ADSS	0.9106	9.82e-05
MSTRG.43961.1	ACER2	-0.901303	0.000151097
MSTRG.43961.1	ADAMTS10	-0.914461	8.09e-05
MSTRG.44723.1	ANAPC7	-0.927661	3.88e-05
MSTRG.44791.6	A1CF	0.914735	7.98e-05
MSTRG.44791.6	ACTN2	0.908401	0.000109134
MSTRG.45091.6	ADAM10	0.911871	9.22e-05
MSTRG.46149.3	AKTIP	0.900739	0.000154887
MSTRG.4895.4	ANAPC7	-0.906874	0.000117302
MSTRG.49260.5	ADGRV1	0.906028	0.000122016
MSTRG.49731.14	ADGRG7	0.910171	0.000100225
MSTRG.51365.1	ANGPTL2	-0.963674	1.84e-06
MSTRG.52782.4	ACAA1	0.936257	2.22e-05
MSTRG.53869.1	ANKRD1	0.903569	0.000136558
MSTRG.54298.16	AARS2	0.937729	2.01e-05
MSTRG.54298.22	ANGPT1	0.927028	4.03e-05
MSTRG.5507.1	AEBP2	0.901689	0.000148539
MSTRG.55338.39	ABRAXAS2	-0.919965	6.05e-05
MSTRG.55653.2	AGR3	0.96551	1.46e-06
MSTRG.56851.28	AADAC	0.921046	5.7e-05
MSTRG.56851.8	ABHD6	0.932119	2.93e-05
MSTRG.58298.1	ADCY1	-0.913536	8.48e-05
MSTRG.58374.18	ADD3	0.92561	4.39e-05
MSTRG.58951.1	ALDH9A1	-0.905108	0.000127312
MSTRG.62144.6	AK7	0.971718	6.05e-07
MSTRG.62144.6	AKAP14	0.960028	2.82e-06
MSTRG.62497.6	ADAMTS10	0.902464	0.000143505
MSTRG.62497.6	AFMID	0.901245	0.000151479
MSTRG.62497.6	ALX4	0.925508	4.41e-05
MSTRG.62759.1	ABI3	0.922982	5.11e-05
MSTRG.62759.1	ADRB3	0.905723	0.000123754
MSTRG.63751.6	AGXT	0.903573	0.000136534
MSTRG.64218.2	AGR3	0.927878	3.83e-05
MSTRG.64269.1	ANKLE1	0.907595	0.000113386
MSTRG.64439.1	ADAR	-0.920107	6e-05
MSTRG.65390.1	AHCYL1	0.955911	4.36e-06
MSTRG.65390.1	ALG3	0.936338	2.21e-05
MSTRG.65445.2	ALKAL2	0.903133	0.000139269
MSTRG.66715.1	AHCYL1	0.914346	8.14e-05
MSTRG.6700.5	A4GNT	0.960481	2.68e-06
MSTRG.6700.5	AGXT	0.920528	5.86e-05
MSTRG.6700.5	AK8	0.908923	0.000106445
MSTRG.6700.5	ALB	0.910352	9.93e-05
MSTRG.67244.54	ABCC2	0.972734	5.14e-07
MSTRG.69966.1	ADCY1	0.909197	0.000105055
MSTRG.71762.2	ALKBH5	0.90703	0.000116446
MSTRG.73345.87	ABI3	0.939548	1.76e-05
MSTRG.73345.87	ADRB3	0.981396	9.31e-08
MSTRG.74084.27	ALG9	0.915896	7.52e-05
MSTRG.75233.3	ABI3	0.975268	3.32e-07
MSTRG.75233.3	ANGPT1	0.933897	2.61e-05
MSTRG.75592.3	AGR3	0.939692	1.74e-05
MSTRG.75592.3	AK3	0.920891	5.75e-05
MSTRG.77850.13	ABCB11	0.911977	9.17e-05
MSTRG.80614.1	ABCF2	0.923891	4.85e-05
MSTRG.80614.1	ACKR4	0.907745	0.000112589
MSTRG.80614.1	ACVR2A	0.936185	2.24e-05
MSTRG.80614.1	AGT	0.912756	8.82e-05
MSTRG.81.6	ALKBH5	0.928473	3.69e-05
MSTRG.82450.3	ADTRP	0.915619	7.62e-05
MSTRG.82450.3	ALKAL2	0.90844	0.000108933
MSTRG.82450.3	ANKRD1	0.938465	1.9e-05
MSTRG.82987.2	ADTRP	0.956346	4.17e-06
MSTRG.82987.2	AGT	0.901009	0.000153063
MSTRG.82987.2	AMPD3	0.92442	4.71e-05
MSTRG.82987.2	ANKRD1	0.928195	3.76e-05
MSTRG.83014.11	ADAM10	0.917429	6.93e-05
MSTRG.83014.11	AEBP2	0.93372	2.64e-05
MSTRG.84291.1	ADAMTS10	0.913395	8.54e-05
MSTRG.84442.19	ABI3	0.990006	5.76e-09
MSTRG.84442.19	ADRB3	0.92977	3.41e-05
MSTRG.84442.19	ANGPT1	0.907318	0.000114879
MSTRG.84519.24	A1CF	0.90627	0.000120654
MSTRG.84519.24	A4GNT	0.94961	7.88e-06
MSTRG.84519.24	AGK	0.907083	0.000116157
MSTRG.84519.24	AHSG	0.901755	0.000148108
MSTRG.84519.24	ALB	0.916718	7.2e-05
MSTRG.84519.24	AMBP	0.919865	6.08e-05
MSTRG.84605.38	AEBP2	0.924469	4.69e-05
MSTRG.85910.2	A1CF	0.902138	0.000145609
MSTRG.85910.2	A4GNT	0.994794	3.08e-10
MSTRG.85910.2	ADPRHL1	0.90052	0.000156383
MSTRG.85910.2	AGK	0.936726	2.15e-05
MSTRG.85910.2	AGXT	0.938491	1.9e-05
MSTRG.85910.2	AHSG	0.92893	3.59e-05
MSTRG.85910.2	AK8	0.925329	4.46e-05
MSTRG.85910.2	ALB	0.958415	3.36e-06
MSTRG.85910.2	ALDOB	0.907261	0.000115185
MSTRG.85910.2	AMBP	0.938247	1.93e-05
MSTRG.86189.5	AFMID	0.902697	0.00014202
MSTRG.86284.1	ADAMTSL5	-0.907744	0.000112596
MSTRG.89868.5	AANAT	0.930317	3.29e-05
MSTRG.91046.28	ACOD1	0.958127	3.47e-06
MSTRG.91046.28	AGT	0.931792	3e-05
MSTRG.91046.28	AKAP5	0.900956	0.000153425
MSTRG.91046.28	AMPD3	0.925561	4.4e-05
MSTRG.91046.31	ACOT11	0.929426	3.48e-05
MSTRG.91458.1	AADAC	0.903764	0.000135362
MSTRG.91503.8	ABI3	0.933149	2.74e-05
MSTRG.91503.8	ADRB3	0.934102	2.58e-05
MSTRG.92183.4	AADAC	0.932502	2.86e-05
MSTRG.93537.11	ABI3	0.961039	2.52e-06
MSTRG.93537.11	ANGPT1	0.908034	0.000111057
MSTRG.93756.4	ACAT2	0.925067	4.53e-05
MSTRG.93756.4	ACTL7A	0.95086	7.05e-06
MSTRG.93756.4	ADGB	0.932028	2.95e-05
MSTRG.93756.4	AKAP14	0.944252	1.23e-05
MSTRG.94304.29	ABI3	0.920047	6.02e-05
MSTRG.94304.29	ANGPT1	0.919818	6.1e-05
MSTRG.95728.82	ADGRV1	0.926744	4.1e-05
MSTRG.96061.37	ADAMTS9	0.911921	9.2e-05
MSTRG.98553.2	AADAC	-0.948342	8.79e-06
MSTRG.99904.19	ANAPC7	-0.945919	1.08e-05
MSTRG.100208.32	ARHGAP17	0.928591	3.67e-05
MSTRG.100208.32	ATRN	0.902282	0.00014468
MSTRG.100603.49	ASZ1	0.991797	2.37e-09
MSTRG.101075.1	ANKRD24	0.911349	9.46e-05
MSTRG.101512.1	ATPIF1	0.936474	2.19e-05
MSTRG.101801.1	AP3M2	-0.907905	0.00011174
MSTRG.102005.1	AXIN1	0.90851	0.000108572
MSTRG.102168.1	ANO7	0.950317	7.4e-06
MSTRG.102433.2	ANO3	0.956242	4.21e-06
MSTRG.103771.1	AQP5	-0.903354	0.000137892
MSTRG.10446.1	AP5Z1	0.913097	8.67e-05
MSTRG.104569.4	ANXA2	0.930978	3.16e-05
MSTRG.105847.1	ATP6V0E1	-0.903087	0.000139555
MSTRG.107421.1	ARMC6	0.900207	0.000158534
MSTRG.108527.11	APMAP	0.904606	0.000130272
MSTRG.109063.55	ANKS4B	0.917691	6.84e-05
MSTRG.109084.1	ANKRD42	0.913733	8.4e-05
MSTRG.109143.1	ART4	0.9028	0.000141366
MSTRG.109211.1	ANXA2	0.928337	3.72e-05
MSTRG.110543.1	ANKRD66	0.908414	0.000109067
MSTRG.111406.38	ARL16	0.999166	8.17e-14
MSTRG.111406.38	ARL5B	0.912169	9.08e-05
MSTRG.111406.38	ASB6	0.948703	8.52e-06
MSTRG.111826.18	ARL4A	-0.912355	9e-05
MSTRG.111826.21	ARHGEF33	-0.939701	1.74e-05
MSTRG.111826.26	ANO3	-0.944645	1.19e-05
MSTRG.112163.2	ANP32A	0.905587	0.000124533
MSTRG.11309.16	ARR3	0.918468	6.56e-05
MSTRG.113738.1	AQP8	0.931843	2.99e-05
MSTRG.113738.1	ASMT	0.925299	4.47e-05
MSTRG.114063.1	AP3M2	0.923449	4.98e-05
MSTRG.114064.1	ARL13B	0.909478	0.000103647
MSTRG.114064.1	ATN1	0.907572	0.00011351
MSTRG.114543.1	ATP7B	0.905526	0.000124885
MSTRG.114696.1	B3GNT4	0.911324	9.47e-05
MSTRG.114731.5	ANO2	0.918861	6.42e-05
MSTRG.114891.54	ANKRD66	0.92119	5.65e-05
MSTRG.114891.54	ANXA10	0.90479	0.00012918
MSTRG.115562.1	ARID3B	0.913603	8.45e-05
MSTRG.115662.9	ATPIF1	0.958964	3.17e-06
MSTRG.115682.2	ARR3	0.922791	5.17e-05
MSTRG.116271.1	ARR3	0.913386	8.55e-05
MSTRG.116271.2	ARR3	0.991447	2.86e-09
MSTRG.116271.2	AVPR1B	0.956683	4.03e-06
MSTRG.116271.2	AXDND1	0.965879	1.4e-06
MSTRG.116276.1	ARR3	0.94791	9.12e-06
MSTRG.116812.9	ARL16	0.997811	6.27e-12
MSTRG.116812.9	ARL5B	0.914338	8.14e-05
MSTRG.116812.9	ASB6	0.951466	6.67e-06
MSTRG.117449.2	ANO4	0.903289	0.000138293
MSTRG.117449.2	APLP2	0.976897	2.45e-07
MSTRG.118204.1	AOC1	0.902732	0.000141801
MSTRG.118365.1	AQP5	0.930803	3.19e-05
MSTRG.118708.15	ARC	0.90104	0.000152858
MSTRG.118708.15	ASNSD1	0.903786	0.000135226
MSTRG.118708.15	ATPIF1	0.995553	1.52e-10
MSTRG.118708.15	B4GALT6	0.912543	8.92e-05
MSTRG.119560.22	ATL2	0.902152	0.000145521
MSTRG.119560.22	ATP1B3	0.940849	1.6e-05
MSTRG.126530.14	ANKRD37	0.917592	6.87e-05
MSTRG.126530.14	AQP8	0.906565	0.000119007
MSTRG.127128.6	ATP1B3	0.927507	3.92e-05
MSTRG.127128.7	ASNSD1	0.920142	5.99e-05
MSTRG.127128.7	ATP1B3	0.923208	5.05e-05
MSTRG.127144.1	ARL10	0.908536	0.000108438
MSTRG.12874.1	ASMT	0.943289	1.33e-05
MSTRG.12874.1	ATRN	0.913678	8.42e-05
MSTRG.129783.1	ATPIF1	0.917843	6.78e-05
MSTRG.130197.1	ASZ1	0.991991	2.13e-09
MSTRG.130567.2	ANKRD42	0.925289	4.47e-05
MSTRG.130588.12	ATL2	0.921116	5.68e-05
MSTRG.130780.25	ANKRD66	0.95469	4.92e-06
MSTRG.130780.25	ASIP	0.910046	0.000100834
MSTRG.130780.25	B3GALT5	0.930526	3.25e-05
MSTRG.130780.25	B3GNT4	0.941324	1.54e-05
MSTRG.130959.16	ASIP	0.91615	7.42e-05
MSTRG.132501.4	ASNSD1	0.943639	1.29e-05
MSTRG.132501.4	ATL2	0.926541	4.15e-05
MSTRG.132501.4	ATPIF1	0.945178	1.14e-05
MSTRG.132501.4	B4GALT6	0.953158	5.7e-06
MSTRG.132865.10	ASZ1	0.997079	2.29e-11
MSTRG.133113.1	ARL6IP1	-0.915041	7.86e-05
MSTRG.133113.1	ARR3	0.939191	1.81e-05
MSTRG.133113.1	AVPR1B	0.958905	3.19e-06
MSTRG.133113.1	AXDND1	0.960804	2.58e-06
MSTRG.133135.11	ASPG	0.952999	5.79e-06
MSTRG.133478.20	APOB	0.913271	8.6e-05
MSTRG.133478.20	APOH	0.902011	0.000146435
MSTRG.133478.20	ARHGEF12	0.922045	5.39e-05
MSTRG.135280.1	ARGLU1	0.954797	4.87e-06
MSTRG.135930.17	ANKRD66	0.907152	0.00011578
MSTRG.135930.17	ANXA10	0.958535	3.32e-06
MSTRG.135930.17	ASIP	0.953473	5.53e-06
MSTRG.136018.22	ATP8A2	0.902204	0.000145184
MSTRG.13608.16	ARHGEF12	0.920763	5.79e-05
MSTRG.13852.6	ASNSD1	0.921935	5.42e-05
MSTRG.1393.3	ASNSD1	0.909876	0.000101672
MSTRG.139603.1	ASAH1	0.922961	5.12e-05
MSTRG.140077.4	ARSI	0.925783	4.34e-05
MSTRG.142573.14	ANKRD24	0.93301	2.77e-05
MSTRG.143046.35	ANKRD66	0.912624	8.88e-05
MSTRG.143046.35	ANXA10	0.916383	7.33e-05
MSTRG.143046.35	ASIP	0.940712	1.62e-05
MSTRG.143287.26	ATPIF1	0.95615	4.25e-06
MSTRG.143673.21	APOB	0.955286	4.64e-06
MSTRG.143673.21	APOH	0.954256	5.13e-06
MSTRG.144940.14	ANKRD66	0.930952	3.16e-05
MSTRG.144940.14	ANXA10	0.950875	7.04e-06
MSTRG.144940.14	ASIP	0.964498	1.66e-06
MSTRG.146389.19	ARR3	0.956389	4.15e-06
MSTRG.146389.19	AVPR1B	0.934532	2.5e-05
MSTRG.146389.19	AXDND1	0.953364	5.59e-06
MSTRG.146468.1	ASZ1	0.901775	0.000147973
MSTRG.148853.1	ASIC5	0.935335	2.37e-05
MSTRG.149605.1	ASAH1	0.94693	9.91e-06
MSTRG.149626.1	ARC	0.923252	5.03e-05
MSTRG.149626.1	ASNSD1	0.907712	0.000112766
MSTRG.149626.1	ATPIF1	0.940641	1.62e-05
MSTRG.149862.3	ANKRD66	0.972091	5.7e-07
MSTRG.149862.3	ANXA10	0.973043	4.88e-07
MSTRG.149862.3	ASIP	0.98008	1.26e-07
MSTRG.150244.57	ANXA11	0.917166	7.03e-05
MSTRG.150645.41	ASZ1	0.990755	4.06e-09
MSTRG.151642.31	ATP2B2	0.91881	6.44e-05
MSTRG.15216.2	APP	-0.913869	8.34e-05
MSTRG.152502.4	ARFRP1	0.928351	3.72e-05
MSTRG.153699.2	ASPHD2	0.915266	7.77e-05
MSTRG.15473.38	ANO5	-0.913541	8.48e-05
MSTRG.154990.1	ASB6	0.916307	7.36e-05
MSTRG.154990.1	ATP6V1B2	0.911682	9.31e-05
MSTRG.15536.1	ATP2B2	0.901913	0.000147071
MSTRG.156630.5	APIP	-0.951892	6.42e-06
MSTRG.157095.1	ARPC2	0.94783	9.18e-06
MSTRG.157634.3	ANKRD24	0.963532	1.88e-06
MSTRG.17539.17	ANKRD66	0.979791	1.35e-07
MSTRG.17539.17	ANXA10	0.961581	2.36e-06
MSTRG.17539.17	ASIP	0.971108	6.65e-07
MSTRG.17539.17	B3GNT4	0.904023	0.00013378
MSTRG.17762.7	AQP8	0.955751	4.43e-06
MSTRG.18056.4	ASB6	0.943615	1.29e-05
MSTRG.18056.4	ATP6V1B2	0.905523	0.000124903
MSTRG.18305.46	ARL16	0.942938	1.36e-05
MSTRG.18305.46	ASB6	0.956413	4.14e-06
MSTRG.18390.2	ANKS4B	0.953922	5.3e-06
MSTRG.18390.2	ATP1B4	0.902893	0.00014078
MSTRG.19613.1	ANO7	0.901092	0.000152508
MSTRG.19790.1	ARMC6	-0.903063	0.000139706
MSTRG.20206.12	ATL2	0.907271	0.000115131
MSTRG.20206.12	ATP1B3	0.932132	2.93e-05
MSTRG.20206.12	ATPIF1	0.913035	8.7e-05
MSTRG.20206.12	B4GALT6	0.929248	3.52e-05
MSTRG.21907.3	ASZ1	0.940387	1.66e-05
MSTRG.22294.1	ATP1B3	0.905176	0.000126918
MSTRG.23514.1	APOB	0.911829	9.24e-05
MSTRG.24262.18	ARPC2	0.916904	7.13e-05
MSTRG.24262.18	ARR3	0.914517	8.07e-05
MSTRG.24262.18	AVPR1B	0.925501	4.42e-05
MSTRG.24790.2	ASZ1	0.995544	1.53e-10
MSTRG.26082.32	ATF3	0.905882	0.000122849
MSTRG.26082.32	ATG101	-0.904904	0.000128508
MSTRG.2680.20	AP5Z1	0.911252	9.51e-05
MSTRG.31063.6	ATPIF1	0.907565	0.00011355
MSTRG.32398.2	ANXA2	0.904444	0.00013124
MSTRG.3338.5	ANKRD42	0.944455	1.21e-05
MSTRG.3338.5	AQP8	0.92426	4.75e-05
MSTRG.34052.1	ASPHD2	0.913715	8.41e-05
MSTRG.34377.1	ANKRD66	0.913593	8.46e-05
MSTRG.34377.1	ANXA10	0.946861	9.96e-06
MSTRG.34377.1	ASIP	0.943445	1.31e-05
MSTRG.35016.6	ARR3	0.907278	0.000115097
MSTRG.35016.6	AVPR1B	0.901687	0.000148555
MSTRG.35791.1	ARID5B	0.903944	0.000134262
MSTRG.35971.4	ASH1L	0.910531	9.85e-05
MSTRG.36087.27	ASZ1	0.958644	3.28e-06
MSTRG.36570.4	ATL2	0.916277	7.37e-05
MSTRG.36855.1	AP5Z1	0.942209	1.44e-05
MSTRG.38415.6	ANO3	0.97197	5.81e-07
MSTRG.40207.1	ARHGEF39	-0.901527	0.000149607
MSTRG.41046.1	AP3D1	0.91136	9.46e-05
MSTRG.42038.27	ARC	0.902225	0.000145044
MSTRG.42038.27	ASNSD1	0.918248	6.64e-05
MSTRG.42038.27	ATPIF1	0.962259	2.18e-06
MSTRG.42467.1	ARHGEF39	-0.902058	0.000146127
MSTRG.42608.1	ARPC2	0.940559	1.63e-05
MSTRG.42608.1	ARR3	0.900922	0.000153654
MSTRG.42668.10	ANKRD33	0.988258	1.19e-08
MSTRG.42668.10	AOC1	0.907354	0.000114687
MSTRG.42668.10	AQP2	0.929711	3.42e-05
MSTRG.42668.10	ATP4B	0.995016	2.53e-10
MSTRG.43610.1	ARHGAP17	0.907624	0.000113232
MSTRG.43610.1	ATRN	0.923083	5.08e-05
MSTRG.44791.6	ASB4	0.929771	3.41e-05
MSTRG.44791.6	ATP1B4	0.911439	9.42e-05
MSTRG.45024.5	ARL13B	0.910746	9.75e-05
MSTRG.45091.6	ATP7B	0.907922	0.00011165
MSTRG.45782.1	ASMT	0.905931	0.000122569
MSTRG.46149.3	ASZ1	0.908437	0.000108951
MSTRG.46310.9	ATP6V0A1	0.944222	1.23e-05
MSTRG.4691.35	ATP6V1A	0.913946	8.31e-05
MSTRG.47331.1	ARID1A	0.966018	1.37e-06
MSTRG.4895.4	APPBP2	-0.909429	0.000103888
MSTRG.49586.1	AP5Z1	0.904001	0.000133916
MSTRG.49873.19	ART4	0.958697	3.26e-06
MSTRG.51365.1	ARFIP2	0.902784	0.000141467
MSTRG.51962.1	ASMTL	-0.918417	6.58e-05
MSTRG.5236.2	ATP6V0A1	0.918181	6.66e-05
MSTRG.52497.2	ANXA11	0.900058	0.000159567
MSTRG.52706.57	ASMTL	-0.944341	1.22e-05
MSTRG.52782.4	ANKRD66	0.92868	3.65e-05
MSTRG.52782.4	ARFGAP3	0.911005	9.62e-05
MSTRG.53869.1	ANKRD42	0.918242	6.64e-05
MSTRG.54298.16	ASCL2	0.927906	3.82e-05
MSTRG.55653.2	ARL6IP1	-0.953047	5.76e-06
MSTRG.56127.5	ARL16	0.949574	7.9e-06
MSTRG.56127.5	ASB6	0.904174	0.000132865
MSTRG.56875.1	ARHGEF39	-0.90352	0.000136863
MSTRG.57588.1	ARID3B	0.907621	0.000113251
MSTRG.57588.1	ARL10	0.934144	2.57e-05
MSTRG.58500.1	ASNSD1	0.913382	8.55e-05
MSTRG.58534.1	ASB9	-0.911181	9.54e-05
MSTRG.58534.1	ATP8A2	0.910974	9.64e-05
MSTRG.58951.1	ARFRP1	0.917843	6.78e-05
MSTRG.60208.2	ARPC2	0.926136	4.25e-05
MSTRG.61406.8	ASZ1	0.938744	1.87e-05
MSTRG.61768.1	B3GALT1	-0.90203	0.000146311
MSTRG.62144.6	ANKRD66	0.902269	0.000144764
MSTRG.62144.6	ANXA10	0.963869	1.8e-06
MSTRG.62144.6	ASIP	0.946427	1.03e-05
MSTRG.62412.1	ANKS6	0.934016	2.59e-05
MSTRG.62497.6	ATP10B	0.931116	3.13e-05
MSTRG.62497.6	ATP12A	0.901496	0.000149813
MSTRG.62497.6	ATP7B	0.930911	3.17e-05
MSTRG.64218.2	ARL6IP1	-0.952026	6.34e-06
MSTRG.64218.2	AVPR1B	0.900159	0.000158866
MSTRG.64259.1	ARMC6	-0.961376	2.42e-06
MSTRG.65445.2	ATIC	0.920373	5.91e-05
MSTRG.65445.2	AZI2	0.910505	9.86e-05
MSTRG.67244.54	ASNSD1	0.946522	1.02e-05
MSTRG.67244.54	ATPIF1	0.939715	1.74e-05
MSTRG.69966.1	AOAH	0.907289	0.000115036
MSTRG.71762.2	AQP8	0.903179	0.000138979
MSTRG.71762.2	ASMT	0.940076	1.69e-05
MSTRG.75004.21	ARL16	0.99763	8.95e-12
MSTRG.75004.21	ARL5B	0.902158	0.00014548
MSTRG.75004.21	ASB6	0.932646	2.84e-05
MSTRG.76935.2	ANKRD24	0.932417	2.88e-05
MSTRG.77087.1	ATG12	-0.935178	2.4e-05
MSTRG.80614.1	ANKRD37	0.908522	0.000108511
MSTRG.82450.3	ANKRD42	0.913245	8.61e-05
MSTRG.82450.3	AQP8	0.935777	2.3e-05
MSTRG.82987.2	ANKRD37	0.919196	6.31e-05
MSTRG.82987.2	AQP8	0.958814	3.22e-06
MSTRG.84519.24	APOH	0.908753	0.000107319
MSTRG.84519.24	ATP1B4	0.907609	0.000113314
MSTRG.856.1	ARFIP2	0.930293	3.3e-05
MSTRG.85910.2	APOB	0.91723	7.01e-05
MSTRG.85910.2	APOH	0.945335	1.13e-05
MSTRG.86106.159	ASRGL1	-0.911823	9.24e-05
MSTRG.89989.31	ASNSD1	0.922193	5.34e-05
MSTRG.89989.31	ATL2	0.936244	2.23e-05
MSTRG.89989.31	ATPIF1	0.96901	9.09e-07
MSTRG.89989.31	B4GALT6	0.953235	5.66e-06
MSTRG.90552.1	ATP6V1A	0.916076	7.45e-05
MSTRG.91046.28	AQP8	0.906463	0.000119574
MSTRG.91046.31	ATG101	-0.935333	2.37e-05
MSTRG.92221.8	ARPC2	0.952955	5.81e-06
MSTRG.92989.46	ARL5B	0.934032	2.59e-05
MSTRG.93756.4	ANKRD66	0.97465	3.71e-07
MSTRG.93756.4	ANXA10	0.980134	1.25e-07
MSTRG.93756.4	APOD	0.905274	0.000126343
MSTRG.93756.4	ASIP	0.993352	9.23e-10
MSTRG.93756.4	ATP8B3	0.91453	8.06e-05
MSTRG.93756.4	B3GALT5	0.909583	0.000103119
MSTRG.93772.8	ATP2B2	0.911729	9.29e-05
MSTRG.93939.1	ARHGEF16	-0.95155	6.62e-06
MSTRG.94637.1	ATF3	0.929534	3.46e-05
MSTRG.94641.1	ATOX1	-0.914323	8.15e-05
MSTRG.95728.82	ANKRD24	0.907519	0.000113797
MSTRG.96061.37	ATP6V0A1	0.926619	4.13e-05
MSTRG.100208.32	BMP2K	0.920303	5.94e-05
MSTRG.100603.49	BRSK2	0.909606	0.000103005
MSTRG.100603.49	BTLA	0.915405	7.71e-05
MSTRG.100603.49	CCDC180	0.905246	0.000126505
MSTRG.101548.1	BTBD3	0.916621	7.24e-05
MSTRG.102499.2	BLOC1S6	0.973962	4.18e-07
MSTRG.102499.2	BTBD17	0.974445	3.85e-07
MSTRG.102499.2	C1QL3	0.925857	4.32e-05
MSTRG.10446.1	CCDC102B	0.909817	0.00010196
MSTRG.105256.123	BLOC1S6	0.95655	4.08e-06
MSTRG.105256.123	BTBD17	0.957595	3.67e-06
MSTRG.105256.123	C1QL3	0.951764	6.49e-06
MSTRG.105256.45	BLOC1S6	0.99862	7.88e-13
MSTRG.105256.45	BTBD17	0.998429	1.41e-12
MSTRG.105256.45	C1QL3	0.959271	3.07e-06
MSTRG.105256.66	BEND3	0.979492	1.44e-07
MSTRG.108315.2	C5	0.91112	9.57e-05
MSTRG.108527.11	CA3	0.925941	4.3e-05
MSTRG.109646.2	BLOC1S6	0.969845	8.05e-07
MSTRG.109646.2	BTBD17	0.971057	6.7e-07
MSTRG.109646.2	C1QL3	0.954168	5.18e-06
MSTRG.110227.2	BRSK2	0.921957	5.42e-05
MSTRG.110227.2	BTLA	0.911539	9.37e-05
MSTRG.110227.2	CCDC180	0.914424	8.11e-05
MSTRG.111406.38	BEST4	0.999166	8.17e-14
MSTRG.111406.38	C1QL4	0.999166	8.17e-14
MSTRG.111406.38	CASR	0.990113	5.48e-09
MSTRG.111826.18	BIN1	0.922329	5.3e-05
MSTRG.111826.18	CAMSAP1	0.920696	5.81e-05
MSTRG.111826.21	C8G	-0.919227	6.3e-05
MSTRG.111826.25	CAMSAP1	0.909549	0.00010329
MSTRG.112163.2	BLMH	0.902004	0.000146477
MSTRG.11309.16	CALHM1	0.911445	9.42e-05
MSTRG.113663.11	BLOC1S6	0.947553	9.4e-06
MSTRG.113663.11	BTBD17	0.947635	9.34e-06
MSTRG.113738.1	BMPER	0.917972	6.74e-05
MSTRG.114445.45	BTRC	0.925633	4.38e-05
MSTRG.114696.1	CAMSAP2	0.904043	0.000133661
MSTRG.114731.5	BTG2	0.949435	8e-06
MSTRG.114731.5	C1R	0.906971	0.000116765
MSTRG.114849.42	CARNS1	0.947961	9.08e-06
MSTRG.114849.42	CCDC113	0.901883	0.000147267
MSTRG.114891.54	BRAP	0.941032	1.58e-05
MSTRG.114891.54	BTBD6	0.914147	8.22e-05
MSTRG.114891.54	CA7	0.921978	5.41e-05
MSTRG.114923.1	CARNS1	0.919159	6.32e-05
MSTRG.114930.1	BROX	-0.927421	3.94e-05
MSTRG.115520.46	CA3	0.908302	0.000109651
MSTRG.115682.2	CALHM1	0.944659	1.19e-05
MSTRG.115870.2	CCDC69	0.915206	7.79e-05
MSTRG.116271.1	CCL20	0.982141	7.76e-08
MSTRG.116271.2	BSX	0.911266	9.5e-05
MSTRG.116271.2	CALHM1	0.906988	0.000116677
MSTRG.116271.2	CCL20	0.928587	3.67e-05
MSTRG.116276.1	CALHM1	0.908573	0.000108244
MSTRG.116276.1	CCL20	0.976514	2.64e-07
MSTRG.116345.11	BLOC1S6	0.920378	5.91e-05
MSTRG.116345.11	BTBD17	0.922361	5.29e-05
MSTRG.116433.17	BRSK2	0.91469	8e-05
MSTRG.116812.9	BEST4	0.997811	6.27e-12
MSTRG.116812.9	C1QL4	0.997811	6.27e-12
MSTRG.116812.9	CASR	0.980065	1.27e-07
MSTRG.117449.2	BPIFB2	0.906572	0.000118967
MSTRG.118365.1	CAPZA1	-0.906464	0.000119569
MSTRG.119139.1	BTLA	0.915684	7.6e-05
MSTRG.120158.1	CARNS1	0.92391	4.85e-05
MSTRG.125629.5	BLOC1S6	0.93565	2.32e-05
MSTRG.125629.5	BTBD17	0.936798	2.14e-05
MSTRG.125629.5	C1QL3	0.930021	3.35e-05
MSTRG.130780.25	BRDT	0.906503	0.000119352
MSTRG.130780.25	CA7	0.919443	6.22e-05
MSTRG.130780.25	CAMSAP2	0.905208	0.000126727
MSTRG.130959.16	BPIFB2	0.980705	1.1e-07
MSTRG.130959.16	BTF3L4	0.902551	0.000142953
MSTRG.130959.16	CCDC39	0.915624	7.62e-05
MSTRG.130959.16	CCDC60	0.907986	0.000111312
MSTRG.131288.55	C3	0.909309	0.00010449
MSTRG.131825.13	CARNS1	0.901482	0.000149904
MSTRG.132865.10	BTLA	0.90474	0.000129477
MSTRG.132865.10	CCDC180	0.906308	0.000120443
MSTRG.133113.1	BMP2	0.947398	9.53e-06
MSTRG.133113.1	CALHM1	0.912971	8.73e-05
MSTRG.133456.1	BLOC1S6	0.990227	5.21e-09
MSTRG.133456.1	BTBD17	0.989165	8.27e-09
MSTRG.133456.1	C1QL3	0.956678	4.03e-06
MSTRG.1337.1	C3	0.901248	0.000151461
MSTRG.133762.1	BRSK2	0.908286	0.000109736
MSTRG.133880.4	CA3	0.900422	0.000157052
MSTRG.135076.1	CAMSAP2	0.901057	0.000152744
MSTRG.135077.1	CAMSAP2	0.901596	0.000149151
MSTRG.135930.17	BRDT	0.915342	7.73e-05
MSTRG.136018.22	CAPN14	-0.955653	4.47e-06
MSTRG.137465.11	BLOC1S6	0.922489	5.26e-05
MSTRG.137465.11	BTBD17	0.923738	4.89e-05
MSTRG.137741.1	CAND1	0.911045	9.6e-05
MSTRG.139896.9	C1QTNF7	0.902879	0.000140868
MSTRG.139924.1	CASZ1	-0.949771	7.77e-06
MSTRG.143046.35	BRDT	0.919288	6.28e-05
MSTRG.143046.35	CCDC39	0.933429	2.69e-05
MSTRG.143673.21	C8A	0.929639	3.44e-05
MSTRG.143749.62	CBL	-0.928378	3.72e-05
MSTRG.144940.14	BRDT	0.927665	3.88e-05
MSTRG.144940.14	CARS	0.934139	2.57e-05
MSTRG.144940.14	CBX8	0.944676	1.19e-05
MSTRG.144940.14	CCDC39	0.903174	0.000139014
MSTRG.144940.14	CCDC93	0.904014	0.000133833
MSTRG.145704.1	CASP9	0.90228	0.000144693
MSTRG.146389.19	BMP2	0.925549	4.4e-05
MSTRG.146389.19	CALHM1	0.930853	3.18e-05
MSTRG.146468.1	BTLA	0.952679	5.96e-06
MSTRG.147297.12	CAPSL	0.917503	6.91e-05
MSTRG.148507.2	CARD11	0.917317	6.98e-05
MSTRG.148961.2	CCDC180	0.936934	2.12e-05
MSTRG.149308.4	BLOC1S6	0.997667	8.34e-12
MSTRG.149308.4	BTBD17	0.997999	4.19e-12
MSTRG.149308.4	C1QL3	0.950798	7.09e-06
MSTRG.149862.3	BRDT	0.958793	3.23e-06
MSTRG.149862.3	CA7	0.924897	4.58e-05
MSTRG.149862.3	CCDC93	0.938199	1.94e-05
MSTRG.150645.41	BRSK2	0.920597	5.84e-05
MSTRG.150645.41	BTLA	0.917897	6.76e-05
MSTRG.150645.41	CARD11	0.909554	0.000103263
MSTRG.152224.1	CCDC172	0.911895	9.21e-05
MSTRG.152224.1	CCKAR	0.903937	0.000134305
MSTRG.153092.1	CCDC14	0.91804	6.71e-05
MSTRG.153699.2	CCDC125	0.911934	9.19e-05
MSTRG.15473.38	BSG	0.905285	0.000126283
MSTRG.154980.1	CASZ1	-0.937615	2.02e-05
MSTRG.155054.5	C2CD4C	0.906182	0.000121146
MSTRG.155590.20	CALN1	0.908504	0.000108599
MSTRG.156449.3	BEND3	0.934128	2.57e-05
MSTRG.157134.2	BLOC1S6	0.975461	3.21e-07
MSTRG.157134.2	BTBD17	0.976422	2.69e-07
MSTRG.157134.2	C1QL3	0.960807	2.58e-06
MSTRG.17539.17	BRDT	0.941085	1.57e-05
MSTRG.17539.17	CA7	0.915553	7.65e-05
MSTRG.17539.17	CCDC93	0.927143	4.01e-05
MSTRG.17545.11	BDKRB1	0.901413	0.000150362
MSTRG.17703.16	BEND3	0.906776	0.00011784
MSTRG.17703.16	CARNS1	0.902378	0.000144056
MSTRG.17703.16	CCDC113	0.934342	2.53e-05
MSTRG.17762.7	CAPN6	0.901163	0.000152032
MSTRG.18269.3	BCL2L11	0.923973	4.83e-05
MSTRG.18269.3	CA5A	0.907745	0.00011259
MSTRG.18269.3	CAPN13	0.901679	0.000148604
MSTRG.18269.3	CCDC40	0.942122	1.45e-05
MSTRG.18305.46	BEST4	0.942938	1.36e-05
MSTRG.18305.46	C1QL4	0.942938	1.36e-05
MSTRG.18305.46	CASR	0.938374	1.92e-05
MSTRG.18390.2	CCDC172	0.909126	0.000105417
MSTRG.18390.2	CCKAR	0.911855	9.23e-05
MSTRG.18717.1	BEND6	0.900592	0.000155893
MSTRG.19984.1	CAMSAP1	0.930985	3.16e-05
MSTRG.20405.8	BTLA	0.922938	5.12e-05
MSTRG.20405.8	CARD9	0.908625	0.000107977
MSTRG.21907.3	BTLA	0.929448	3.48e-05
MSTRG.21927.58	CCDC88A	0.918229	6.64e-05
MSTRG.24502.8	BLOC1S6	0.974833	3.59e-07
MSTRG.24502.8	BTBD17	0.975861	2.98e-07
MSTRG.24502.8	C1QL3	0.959662	2.94e-06
MSTRG.24790.2	BRSK2	0.904785	0.000129213
MSTRG.24790.2	BTLA	0.913354	8.56e-05
MSTRG.24790.2	CCDC180	0.916563	7.26e-05
MSTRG.25503.4	C6	0.935245	2.38e-05
MSTRG.25511.1	CAPN10	0.901862	0.000147403
MSTRG.25511.1	CASZ1	-0.90486	0.000128766
MSTRG.25762.10	BANP	-0.922015	5.4e-05
MSTRG.26082.32	CA3	0.941992	1.47e-05
MSTRG.2680.20	CCDC102B	0.917179	7.03e-05
MSTRG.2688.1	CARNS1	0.907719	0.000112724
MSTRG.27215.99	BTBD7	0.927702	3.87e-05
MSTRG.30251.4	BLOC1S6	0.995317	1.91e-10
MSTRG.30251.4	BTBD17	0.99533	1.89e-10
MSTRG.30251.4	C1QL3	0.967172	1.17e-06
MSTRG.3331.3	CASP3	-0.913799	8.37e-05
MSTRG.34377.1	CCDC93	0.903692	0.0001358
MSTRG.35016.6	CALHM1	0.907496	0.000113921
MSTRG.3530.30	BTG2	0.914939	7.9e-05
MSTRG.3530.30	C1R	0.925014	4.54e-05
MSTRG.35791.1	BRSK2	0.917975	6.74e-05
MSTRG.36087.27	CARD11	0.90354	0.000136738
MSTRG.36087.27	CCDC180	0.924666	4.64e-05
MSTRG.39457.4	BDKRB1	0.901607	0.000149083
MSTRG.39457.4	CASR	0.928626	3.66e-05
MSTRG.39495.41	BLOC1S6	0.962912	2.02e-06
MSTRG.39495.41	BTBD17	0.96385	1.8e-06
MSTRG.39495.41	C1QL3	0.914593	8.04e-05
MSTRG.39940.1	CBX2	0.917804	6.8e-05
MSTRG.40535.1	BPIFB2	0.911017	9.62e-05
MSTRG.40547.1	CACNG3	0.9339	2.61e-05
MSTRG.42467.1	CAMSAP2	0.904104	0.000133291
MSTRG.42536.22	CARNS1	0.903636	0.000136146
MSTRG.42561.1	C1QL3	0.928474	3.69e-05
MSTRG.42668.10	BCCIP	0.913247	8.61e-05
MSTRG.42668.10	BFSP1	0.976127	2.84e-07
MSTRG.42668.10	CCDC61	0.946127	1.06e-05
MSTRG.44791.6	C5	0.948572	8.62e-06
MSTRG.44791.6	CASQ1	0.922558	5.24e-05
MSTRG.45091.6	BCL2L14	0.905342	0.000125948
MSTRG.45681.1	BUB1B	-0.903167	0.000139058
MSTRG.46149.3	BRSK2	0.932623	2.84e-05
MSTRG.46310.9	CA3	0.924074	4.8e-05
MSTRG.48565.6	CABLES2	0.938248	1.93e-05
MSTRG.49762.1	BTBD6	0.921697	5.5e-05
MSTRG.5020.17	CBX6	0.903168	0.00013905
MSTRG.50629.1	CASZ1	-0.903823	0.000134998
MSTRG.52782.4	CA7	0.933037	2.76e-05
MSTRG.54298.22	BORA	0.932846	2.8e-05
MSTRG.5507.1	BCL2L14	0.94267	1.39e-05
MSTRG.55338.39	CABLES1	0.900814	0.000154378
MSTRG.55653.2	BCL2L11	0.926683	4.12e-05
MSTRG.55653.2	CAPN13	0.918244	6.64e-05
MSTRG.55653.2	CCDC32	0.923578	4.94e-05
MSTRG.55653.2	CCDC40	0.932243	2.91e-05
MSTRG.56127.5	BEST4	0.949574	7.9e-06
MSTRG.56127.5	C1QL4	0.949574	7.9e-06
MSTRG.56127.5	CASR	0.936956	2.12e-05
MSTRG.56208.6	BIRC7	0.90738	0.000114546
MSTRG.56851.8	BEND3	0.957354	3.76e-06
MSTRG.58521.8	C1QTNF1	-0.913315	8.58e-05
MSTRG.59297.1	BBS7	0.905456	0.000125291
MSTRG.61078.2	BTBD7	0.900247	0.000158256
MSTRG.61406.8	BTLA	0.912471	8.95e-05
MSTRG.61419.4	BPNT1	0.939174	1.81e-05
MSTRG.62144.6	BRDT	0.918453	6.57e-05
MSTRG.63751.6	CAPRIN1	-0.929638	3.44e-05
MSTRG.63752.1	C1QL1	-0.902724	0.000141851
MSTRG.64218.2	BCL2L11	0.922925	5.13e-05
MSTRG.64218.2	CAPN13	0.904082	0.000133419
MSTRG.64218.2	CCDC40	0.930671	3.22e-05
MSTRG.65445.2	CCDC70	0.904818	0.000129015
MSTRG.66909.86	CARNS1	0.913908	8.32e-05
MSTRG.6700.5	C8A	0.90072	0.000155019
MSTRG.6700.5	CCDC172	0.960481	2.68e-06
MSTRG.6700.5	CCKAR	0.928467	3.69e-05
MSTRG.67187.23	CASZ1	-0.936746	2.15e-05
MSTRG.67618.5	CAMKV	0.903238	0.000138613
MSTRG.71250.3	BLOC1S6	0.943181	1.34e-05
MSTRG.71250.3	BTBD17	0.942668	1.39e-05
MSTRG.71250.3	C1QL3	0.905309	0.000126143
MSTRG.72805.1	BPI	0.953951	5.28e-06
MSTRG.75004.21	BEST4	0.99763	8.95e-12
MSTRG.75004.21	C1QL4	0.99763	8.95e-12
MSTRG.75004.21	CASR	0.981984	8.07e-08
MSTRG.75233.3	CARNS1	0.926198	4.24e-05
MSTRG.75233.3	CCDC113	0.92027	5.95e-05
MSTRG.75592.3	CCDC82	-0.94317	1.34e-05
MSTRG.76725.9	BECN1	0.914515	8.07e-05
MSTRG.76727.6	BMP10	0.955157	4.7e-06
MSTRG.76805.15	CCDC88A	0.919928	6.06e-05
MSTRG.77087.1	BTF3	-0.936358	2.21e-05
MSTRG.77087.1	CAAP1	-0.903888	0.000134599
MSTRG.80614.1	BMPER	0.929784	3.41e-05
MSTRG.80614.1	CASZ1	-0.928996	3.58e-05
MSTRG.81292.4	BRWD1	0.955761	4.42e-06
MSTRG.81292.4	CAMSAP2	0.952822	5.88e-06
MSTRG.81669.25	BLOC1S6	0.919318	6.27e-05
MSTRG.81669.25	BTBD17	0.920598	5.84e-05
MSTRG.81672.1	BOLL	0.910188	0.000100141
MSTRG.82450.3	CAMK1G	0.929328	3.5e-05
MSTRG.82987.2	BMPER	0.919997	6.04e-05
MSTRG.83014.11	BLOC1S6	0.962559	2.11e-06
MSTRG.83014.11	BTBD17	0.963635	1.85e-06
MSTRG.83014.11	C1QL3	0.912048	9.14e-05
MSTRG.84442.19	BEND3	0.939563	1.76e-05
MSTRG.84442.19	CARNS1	0.924468	4.69e-05
MSTRG.84442.19	CCDC113	0.927392	3.95e-05
MSTRG.84519.24	C5	0.956931	3.93e-06
MSTRG.84519.24	CCDC172	0.94961	7.88e-06
MSTRG.84519.24	CCKAR	0.944522	1.21e-05
MSTRG.84605.38	BLOC1S6	0.962329	2.17e-06
MSTRG.84605.38	BTBD17	0.960839	2.57e-06
MSTRG.84605.38	C1QL3	0.960212	2.76e-06
MSTRG.856.1	BSG	0.945829	1.08e-05
MSTRG.85910.2	C5	0.949546	7.92e-06
MSTRG.85910.2	C8A	0.936945	2.12e-05
MSTRG.85910.2	CASQ1	0.904733	0.000129517
MSTRG.85910.2	CCDC172	0.994794	3.08e-10
MSTRG.85910.2	CCKAR	0.977966	1.98e-07
MSTRG.91046.31	CA3	0.92851	3.69e-05
MSTRG.91046.31	CAMK2G	0.909268	0.000104696
MSTRG.92989.46	CABLES1	0.932351	2.89e-05
MSTRG.92989.46	CASR	0.925553	4.4e-05
MSTRG.93008.10	CCDC129	0.907031	0.000116441
MSTRG.93134.1	CA10	-0.953303	5.62e-06
MSTRG.93537.11	CA4	0.923084	5.08e-05
MSTRG.93750.1	BCL2	0.910478	9.87e-05
MSTRG.93756.4	BRDT	0.973705	4.37e-07
MSTRG.93756.4	CA7	0.924655	4.64e-05
MSTRG.93756.4	CARS	0.900826	0.000154301
MSTRG.93756.4	CCDC93	0.963202	1.95e-06
MSTRG.94304.29	BEND3	0.945192	1.14e-05
MSTRG.94304.29	CARNS1	0.908446	0.000108904
MSTRG.94558.4	CCDC129	0.904682	0.000129826
MSTRG.95357.60	CCDC102B	0.910739	9.75e-05
MSTRG.95728.22	CAMKV	0.922853	5.15e-05
MSTRG.96061.37	CA3	0.937461	2.05e-05
MSTRG.100603.49	CCR10	0.991797	2.37e-09
MSTRG.100603.49	CHMP4B	0.983162	5.96e-08
MSTRG.101271.1	CELF3	0.95766	3.64e-06
MSTRG.102499.2	CD47	0.900153	0.000158913
MSTRG.102499.2	CDK3	0.966916	1.22e-06
MSTRG.102499.2	CLIC6	0.918823	6.44e-05
MSTRG.105256.123	CDK3	0.94056	1.63e-05
MSTRG.105256.45	CDK3	0.964252	1.72e-06
MSTRG.105256.66	CCR9	0.960815	2.58e-06
MSTRG.105256.66	CLDN19	0.926289	4.22e-05
MSTRG.107780.11	CFAP36	0.904322	0.000131971
MSTRG.108069.1	CCR9	0.92654	4.15e-05
MSTRG.108527.11	CHCHD3	0.929573	3.45e-05
MSTRG.109063.64	CHD4	0.923498	4.96e-05
MSTRG.109100.3	CDC40	-0.912307	9.02e-05
MSTRG.109211.1	CLNS1A	0.90871	0.000107539
MSTRG.109336.2	CLASP2	0.915848	7.53e-05
MSTRG.109646.2	CDK3	0.961594	2.36e-06
MSTRG.109707.1	CEP162	0.905214	0.000126697
MSTRG.110543.1	CHST13	0.918255	6.64e-05
MSTRG.111366.3	CDHR3	0.903362	0.000137839
MSTRG.111366.3	CLPTM1L	0.911927	9.19e-05
MSTRG.111406.38	CD101	0.923581	4.94e-05
MSTRG.111406.38	CLN5	0.902638	0.000142399
MSTRG.111826.21	CLASP1	0.915461	7.69e-05
MSTRG.111826.26	CNIH3	0.900404	0.000157177
MSTRG.112035.29	CLDN20	0.916041	7.46e-05
MSTRG.11309.16	CDK5R2	0.920908	5.74e-05
MSTRG.11309.16	CELF4	0.906733	0.000118073
MSTRG.113663.11	CDK3	0.907203	0.000115503
MSTRG.113738.1	CD59	0.930354	3.29e-05
MSTRG.113738.1	CEMIP	0.910883	9.68e-05
MSTRG.114445.45	CDC40	-0.924256	4.75e-05
MSTRG.114543.1	CD3E	0.907189	0.00011558
MSTRG.114731.5	CLN8	0.931663	3.02e-05
MSTRG.114849.42	CCR9	0.966069	1.36e-06
MSTRG.114891.54	CFAP58	0.902116	0.00014575
MSTRG.114891.54	CHMP3	0.94622	1.05e-05
MSTRG.115662.9	CLDN11	0.912881	8.77e-05
MSTRG.115682.2	CDK5R2	0.900743	0.000154862
MSTRG.116271.1	CD6	0.933332	2.71e-05
MSTRG.116271.2	CELF4	0.986594	2.15e-08
MSTRG.116271.2	CGA	0.956683	4.03e-06
MSTRG.116276.1	CD6	0.934596	2.49e-05
MSTRG.116276.1	CELF4	0.9133	8.58e-05
MSTRG.116345.11	CDK3	0.921102	5.68e-05
MSTRG.116812.9	CD101	0.918295	6.62e-05
MSTRG.116812.9	CLN5	0.912677	8.86e-05
MSTRG.116812.9	CLVS1	0.904039	0.000133684
MSTRG.118226.1	CDH13	-0.945295	1.13e-05
MSTRG.118708.19	CHMP5	0.971046	6.71e-07
MSTRG.12148.2	CEP162	-0.907703	0.000112811
MSTRG.123708.1	CFAP20	0.949557	7.91e-06
MSTRG.125629.5	CDK3	0.95854	3.32e-06
MSTRG.126571.14	CD101	0.920424	5.9e-05
MSTRG.130197.1	CCR10	0.991991	2.13e-09
MSTRG.130197.1	CHMP4B	0.98974	6.47e-09
MSTRG.130574.1	CFAP73	-0.903613	0.000136287
MSTRG.130588.12	CHCHD3	0.923831	4.87e-05
MSTRG.130588.12	CNIH3	0.907464	0.000114093
MSTRG.130780.25	CFAP58	0.910238	9.99e-05
MSTRG.130959.16	CDHR4	0.943796	1.28e-05
MSTRG.130959.16	CHST13	0.923711	4.9e-05
MSTRG.131288.55	CDH9	0.905993	0.000122218
MSTRG.131825.13	CCR9	0.952327	6.16e-06
MSTRG.132308.2	CLDN34	-0.907331	0.000114811
MSTRG.132865.10	CCR10	0.997079	2.29e-11
MSTRG.132865.10	CHMP4B	0.995127	2.29e-10
MSTRG.133113.1	CELF4	0.95025	7.44e-06
MSTRG.133113.1	CGA	0.958905	3.19e-06
MSTRG.133456.1	CDK3	0.957212	3.82e-06
MSTRG.133880.4	CDH9	0.90004	0.000159693
MSTRG.133880.4	CHCHD3	0.90802	0.000111132
MSTRG.134307.21	CDKN1A	0.901974	0.000146674
MSTRG.135550.30	CDH12	0.903431	0.000137413
MSTRG.135550.30	CFAP100	0.900747	0.000154836
MSTRG.135930.17	CDH12	0.942458	1.42e-05
MSTRG.135930.17	CDHR4	0.935863	2.29e-05
MSTRG.135930.17	CFAP100	0.945013	1.16e-05
MSTRG.135930.17	CFAP58	0.956713	4.02e-06
MSTRG.135930.17	CHMP3	0.941234	1.55e-05
MSTRG.136008.11	CDH22	0.905195	0.000126806
MSTRG.136018.22	CHAD	0.942267	1.44e-05
MSTRG.136168.1	CLN8	0.917565	6.88e-05
MSTRG.1393.3	CHMP5	0.91386	8.34e-05
MSTRG.139942.29	CDK6	0.904891	0.000128584
MSTRG.139942.29	CDKL1	0.914763	7.97e-05
MSTRG.139942.29	CHMP5	0.981763	8.52e-08
MSTRG.141003.1	CEP19	0.910113	0.000100509
MSTRG.141713.1	CENPT	-0.907268	0.000115148
MSTRG.142571.2	CEP192	0.905368	0.000125799
MSTRG.143046.35	CCT2	0.909127	0.00010541
MSTRG.143046.35	CDH12	0.947951	9.09e-06
MSTRG.143046.35	CDHR4	0.93486	2.45e-05
MSTRG.143046.35	CFAP100	0.914901	7.91e-05
MSTRG.143046.35	CFAP58	0.91928	6.28e-05
MSTRG.143255.1	CHMP5	0.907516	0.000113811
MSTRG.143287.26	CLDN11	0.905973	0.000122328
MSTRG.143673.21	CHCHD2	0.938571	1.89e-05
MSTRG.144940.14	CDH12	0.939923	1.71e-05
MSTRG.144940.14	CDHR4	0.936077	2.25e-05
MSTRG.144940.14	CFAP100	0.922775	5.17e-05
MSTRG.144940.14	CFAP58	0.959876	2.87e-06
MSTRG.144940.14	CHMP3	0.928323	3.73e-05
MSTRG.146389.19	CELF4	0.926123	4.26e-05
MSTRG.146389.19	CGA	0.934532	2.5e-05
MSTRG.146468.1	CCR10	0.901775	0.000147973
MSTRG.146501.1	CLK1	-0.920411	5.9e-05
MSTRG.146501.1	CLTC	0.973141	4.8e-07
MSTRG.148883.1	CENPK	-0.911414	9.43e-05
MSTRG.149308.4	CDK3	0.962147	2.21e-06
MSTRG.149338.7	CLINT1	0.95239	6.13e-06
MSTRG.149862.3	CDH12	0.935345	2.37e-05
MSTRG.149862.3	CDHR4	0.966013	1.37e-06
MSTRG.149862.3	CERS3	0.929621	3.44e-05
MSTRG.149862.3	CFAP100	0.975654	3.1e-07
MSTRG.149862.3	CFAP58	0.971013	6.75e-07
MSTRG.149862.3	CHMP3	0.942145	1.45e-05
MSTRG.150645.41	CCR10	0.990755	4.06e-09
MSTRG.150645.41	CHMP4B	0.984389	4.25e-08
MSTRG.152502.4	CLTC	-0.914893	7.92e-05
MSTRG.155590.20	CDKL5	0.92186	5.45e-05
MSTRG.156089.11	CLINT1	0.954706	4.91e-06
MSTRG.156449.3	CCR9	0.908254	0.000109905
MSTRG.156478.1	CEP350	0.931472	3.06e-05
MSTRG.157095.4	CDH22	0.902621	0.000142502
MSTRG.157095.4	CFAP20	0.908309	0.000109616
MSTRG.157134.2	CDK3	0.987459	1.59e-08
MSTRG.157134.3	CCR9	0.910527	9.85e-05
MSTRG.160732.39	CGREF1	-0.906685	0.000118342
MSTRG.16998.7	CHMP1B	0.906144	0.000121362
MSTRG.17539.17	CDHR4	0.951773	6.49e-06
MSTRG.17539.17	CERS3	0.928992	3.58e-05
MSTRG.17539.17	CFAP100	0.930211	3.31e-05
MSTRG.17539.17	CFAP44	0.910533	9.85e-05
MSTRG.17539.17	CFAP58	0.97195	5.83e-07
MSTRG.17539.17	CHMP3	0.937502	2.04e-05
MSTRG.17539.17	CHST13	0.900415	0.000157104
MSTRG.17703.16	CCR9	0.983055	6.13e-08
MSTRG.17703.7	CDK5RAP2	0.905904	0.000122723
MSTRG.17703.7	CEP192	0.900803	0.000154458
MSTRG.17762.7	CEMIP	0.909563	0.000103222
MSTRG.18319.2	CHCHD3	0.900819	0.000154347
MSTRG.18907.1	CFAP20	0.911978	9.17e-05
MSTRG.19476.8	CHST11	0.919425	6.23e-05
MSTRG.21907.3	CCR10	0.940387	1.66e-05
MSTRG.21907.3	CHMP4B	0.918621	6.51e-05
MSTRG.24262.18	CELF4	0.93445	2.52e-05
MSTRG.24262.18	CGA	0.925501	4.42e-05
MSTRG.24407.81	CNIH3	0.940254	1.67e-05
MSTRG.24469.1	CIAPIN1	-0.914216	8.19e-05
MSTRG.24469.4	CLINT1	0.937941	1.98e-05
MSTRG.24502.8	CDK3	0.983576	5.33e-08
MSTRG.24790.2	CCR10	0.995544	1.53e-10
MSTRG.24790.2	CHMP4B	0.988279	1.18e-08
MSTRG.24790.2	CHRNA10	0.912509	8.93e-05
MSTRG.25720.1	CLEC3A	0.901709	0.000148411
MSTRG.25742.1	CDH13	-0.902296	0.00014459
MSTRG.25830.1	CDH10	0.923904	4.85e-05
MSTRG.26082.32	CFAP65	0.95893	3.18e-06
MSTRG.27215.93	CHPF	0.901917	0.000147043
MSTRG.30251.4	CDK3	0.974716	3.67e-07
MSTRG.3338.5	CENPE	-0.921833	5.45e-05
MSTRG.34377.1	CDH12	0.905278	0.000126323
MSTRG.34377.1	CDHR4	0.913066	8.69e-05
MSTRG.34377.1	CFAP100	0.947553	9.4e-06
MSTRG.34377.1	CFAP58	0.934951	2.43e-05
MSTRG.34382.3	CDK5RAP2	0.939581	1.76e-05
MSTRG.34997.3	CD96	0.926395	4.19e-05
MSTRG.35016.6	CELF4	0.917473	6.92e-05
MSTRG.35016.6	CFAP46	0.9031	0.000139478
MSTRG.35016.6	CGA	0.901687	0.000148555
MSTRG.36087.27	CCR10	0.958644	3.28e-06
MSTRG.36087.27	CHMP4B	0.93925	1.8e-05
MSTRG.36570.4	CNIH3	0.923729	4.9e-05
MSTRG.39495.40	CDK5R2	0.91226	9.04e-05
MSTRG.39495.41	CDK3	0.931995	2.96e-05
MSTRG.3987.1	CLEC3A	0.913096	8.67e-05
MSTRG.40207.1	CEP192	0.934896	2.44e-05
MSTRG.42038.28	CDC40	-0.900269	0.000158105
MSTRG.42099.13	CDO1	-0.916374	7.33e-05
MSTRG.42403.1	CD96	0.909735	0.000102368
MSTRG.42403.1	CLGN	0.94406	1.25e-05
MSTRG.42403.1	CLIC6	0.911796	9.25e-05
MSTRG.42561.1	CDK3	0.904064	0.000133532
MSTRG.42608.1	CELF4	0.912023	9.15e-05
MSTRG.42608.1	CFAP46	0.905353	0.000125887
MSTRG.42668.10	CHGA	0.924495	4.68e-05
MSTRG.4311.3	CEP19	0.913795	8.37e-05
MSTRG.4352.50	CDR2	0.903378	0.000137742
MSTRG.44125.93	CDC37	-0.933457	2.69e-05
MSTRG.44261.31	CFAP36	0.909601	0.00010303
MSTRG.44261.31	CLINT1	0.927121	4.01e-05
MSTRG.45024.5	CEP192	0.936586	2.17e-05
MSTRG.45091.6	CD47	0.928814	3.62e-05
MSTRG.45091.6	CD96	0.908735	0.000107409
MSTRG.45091.6	CDK3	0.935653	2.32e-05
MSTRG.45091.6	CLGN	0.903811	0.000135075
MSTRG.45091.6	CLIC6	0.911201	9.53e-05
MSTRG.45782.1	CCNG1	0.900247	0.00015826
MSTRG.46149.3	CCR10	0.908437	0.000108951
MSTRG.46149.3	CHMP4B	0.904329	0.000131932
MSTRG.46310.9	CLINT1	0.92243	5.27e-05
MSTRG.4691.35	CDR2	0.901656	0.000148756
MSTRG.4853.1	CD3E	0.932764	2.81e-05
MSTRG.48565.6	CLPX	0.915457	7.69e-05
MSTRG.4895.3	CHCHD3	0.932937	2.78e-05
MSTRG.49260.2	CEP19	0.903958	0.000134174
MSTRG.51778.37	CLINT1	0.91948	6.21e-05
MSTRG.5507.1	CDK3	0.922251	5.33e-05
MSTRG.56208.6	CEP19	0.930832	3.19e-05
MSTRG.56209.12	CDH12	0.931632	3.03e-05
MSTRG.56209.12	CFAP36	0.937565	2.03e-05
MSTRG.56246.1	CDKL2	0.90768	0.000112934
MSTRG.56851.8	CELF3	0.937548	2.03e-05
MSTRG.57515.5	CD86	0.914173	8.21e-05
MSTRG.58534.1	CDK5RAP2	0.918036	6.71e-05
MSTRG.58534.1	CDV3	0.930677	3.22e-05
MSTRG.58534.1	CHAD	0.909222	0.000104932
MSTRG.59410.3	CNIH3	0.916387	7.33e-05
MSTRG.60396.2	CDK6	0.914463	8.09e-05
MSTRG.60396.2	CDKL1	0.904104	0.000133289
MSTRG.60396.2	CHMP5	0.964132	1.74e-06
MSTRG.61406.8	CCR10	0.938744	1.87e-05
MSTRG.61406.8	CHMP4B	0.921585	5.53e-05
MSTRG.62144.6	CDHR4	0.959355	3.04e-06
MSTRG.62144.6	CERKL	0.904896	0.000128556
MSTRG.62144.6	CFAP100	0.923413	4.99e-05
MSTRG.62144.6	CFAP58	0.958776	3.23e-06
MSTRG.62144.6	CHMP3	0.961459	2.4e-06
MSTRG.62497.6	CD96	0.932413	2.88e-05
MSTRG.62497.6	CDCA7L	0.911794	9.26e-05
MSTRG.62497.6	CFAP69	0.939073	1.82e-05
MSTRG.62759.1	CCR9	0.904218	0.000132601
MSTRG.63796.1	CDCA7L	0.908635	0.000107924
MSTRG.63796.1	CDH13	-0.910712	9.76e-05
MSTRG.64218.2	CGA	0.900159	0.000158866
MSTRG.64439.1	CDC5L	0.936171	2.24e-05
MSTRG.64620.1	CDK6	0.904477	0.000131043
MSTRG.64620.1	CDKL1	0.905124	0.00012722
MSTRG.64620.1	CHMP5	0.957256	3.8e-06
MSTRG.65397.1	CFAP36	0.959812	2.89e-06
MSTRG.65445.2	CCNG1	0.94815	8.94e-06
MSTRG.65445.2	CEMIP	0.91786	6.78e-05
MSTRG.66082.2	CHMP5	0.916799	7.17e-05
MSTRG.66909.61	CD244	0.905967	0.000122363
MSTRG.6700.5	CIB3	0.901896	0.000147184
MSTRG.6700.5	CMC4	0.936269	2.22e-05
MSTRG.67094.1	CDH5	0.916117	7.43e-05
MSTRG.67187.23	CEBPB	0.910711	9.76e-05
MSTRG.71250.3	CDK3	0.932928	2.78e-05
MSTRG.71762.2	CCNG1	0.903139	0.000139233
MSTRG.73345.87	CCR9	0.929467	3.47e-05
MSTRG.7376.2	CCNY	0.929293	3.51e-05
MSTRG.7376.2	CCT2	0.932591	2.85e-05
MSTRG.7376.2	CHST13	0.955294	4.63e-06
MSTRG.73855.1	CDK6	0.937005	2.11e-05
MSTRG.73855.1	CDKL1	0.944425	1.21e-05
MSTRG.73855.1	CHMP5	0.94846	8.7e-06
MSTRG.75004.21	CD101	0.925827	4.33e-05
MSTRG.75004.21	CLN5	0.904107	0.000133272
MSTRG.75004.21	CLVS1	0.905357	0.00012586
MSTRG.75233.3	CCR9	0.964026	1.77e-06
MSTRG.75233.3	CLDN19	0.910508	9.86e-05
MSTRG.77087.1	CEP120	-0.941498	1.52e-05
MSTRG.77087.1	CLTA	-0.91258	8.9e-05
MSTRG.80113.1	CDKL2	0.955719	4.44e-06
MSTRG.80997.1	CD96	0.929347	3.5e-05
MSTRG.81292.4	CDHR3	0.920228	5.96e-05
MSTRG.81292.4	CLPTM1L	0.913023	8.7e-05
MSTRG.82450.3	CD83	0.934941	2.43e-05
MSTRG.82987.2	CEMIP	0.916634	7.23e-05
MSTRG.83014.11	CDK3	0.954137	5.19e-06
MSTRG.83076.1	CHAMP1	-0.92598	4.29e-05
MSTRG.84291.1	CD3E	0.90403	0.000133735
MSTRG.84291.1	CDH13	-0.906744	0.000118017
MSTRG.84442.19	CCR9	0.97769	2.1e-07
MSTRG.84605.1	CDK3	0.906183	0.000121144
MSTRG.84605.38	CDK3	0.937447	2.05e-05
MSTRG.85910.2	CMC4	0.927322	3.96e-05
MSTRG.86189.5	CDK3	0.909762	0.000102232
MSTRG.86284.1	CDK17	0.910929	9.66e-05
MSTRG.86315.3	CFAP46	0.952469	6.08e-06
MSTRG.91046.28	CCNG1	0.912687	8.85e-05
MSTRG.91046.31	CFAP65	0.918819	6.44e-05
MSTRG.91503.8	CCR9	0.914999	7.87e-05
MSTRG.91506.1	CDC40	-0.913001	8.71e-05
MSTRG.92780.9	CKLF	-0.904309	0.000132053
MSTRG.92813.1	CCT7	-0.930655	3.22e-05
MSTRG.92989.44	CEP78	-0.920712	5.81e-05
MSTRG.93537.11	CCR9	0.948917	8.37e-06
MSTRG.93756.4	CDH12	0.910048	0.000100825
MSTRG.93756.4	CDHR4	0.975385	3.25e-07
MSTRG.93756.4	CERS3	0.943846	1.27e-05
MSTRG.93756.4	CFAP100	0.969907	7.97e-07
MSTRG.93756.4	CFAP44	0.909129	0.0001054
MSTRG.93756.4	CFAP58	0.985512	3.04e-08
MSTRG.93756.4	CHMP3	0.944479	1.21e-05
MSTRG.93772.8	CD47	0.925133	4.51e-05
MSTRG.93772.8	CFAP69	0.913688	8.42e-05
MSTRG.93772.8	CLIC6	0.910136	0.000100393
MSTRG.94304.29	CCR9	0.900239	0.000158312
MSTRG.94304.29	CLDN19	0.93964	1.75e-05
MSTRG.94909.1	CDCA7L	0.907089	0.000116125
MSTRG.96061.37	CDH9	0.918726	6.47e-05
MSTRG.96061.37	CLINT1	0.927364	3.95e-05
MSTRG.97766.2	CEP350	0.910718	9.76e-05
MSTRG.98656.3	CDKL1	0.900422	0.000157053
MSTRG.98656.3	CHMP5	0.976145	2.83e-07
MSTRG.100603.49	COL6A6	0.920015	6.03e-05
MSTRG.100603.49	COPS7B	0.911135	9.56e-05
MSTRG.100603.49	CSMD3	0.984986	3.57e-08
MSTRG.100603.49	CUNH14orf39	0.991797	2.37e-09
MSTRG.100603.49	CUNH1orf158	0.973669	4.4e-07
MSTRG.100603.49	CUNH21orf140	0.991797	2.37e-09
MSTRG.100603.49	CUNH21orf62	0.915363	7.73e-05
MSTRG.101512.1	CUNH10orf53	0.935667	2.32e-05
MSTRG.101528.1	CUNH1orf74	0.91538	7.72e-05
MSTRG.101764.1	CPNE3	-0.926572	4.14e-05
MSTRG.102499.2	CRYBB2	0.910624	9.8e-05
MSTRG.102521.9	CUNH10orf71	0.94065	1.62e-05
MSTRG.103771.1	CRKL	0.925377	4.45e-05
MSTRG.105256.123	CUNH14orf2	0.923161	5.06e-05
MSTRG.105256.45	CRYBB2	0.900153	0.000158909
MSTRG.105256.45	CUNH14orf2	0.909583	0.000103122
MSTRG.105256.66	COL8A1	0.930162	3.33e-05
MSTRG.106021.2	CRYBB2	0.91086	9.69e-05
MSTRG.107262.2	CNTF	0.962148	2.21e-06
MSTRG.108069.1	COL8A1	0.901109	0.000152393
MSTRG.108315.2	CTNNA3	0.943951	1.26e-05
MSTRG.108366.32	CUNH11orf57	0.904677	0.000129851
MSTRG.108527.11	CSMD1	0.909236	0.000104859
MSTRG.108527.11	CUNH5orf58	0.912167	9.09e-05
MSTRG.108527.11	CUNH8orf37	0.940132	1.69e-05
MSTRG.109063.64	CRLS1	0.905986	0.000122255
MSTRG.109336.2	COQ6	0.900336	0.000157646
MSTRG.109336.2	CUNH10orf76	-0.900861	0.00015406
MSTRG.110227.2	CRACR2A	0.907852	0.00011202
MSTRG.110227.2	CSTA	0.916065	7.45e-05
MSTRG.110227.2	CUNH14orf37	0.942327	1.43e-05
MSTRG.111406.38	CUNH15orf65	0.999166	8.17e-14
MSTRG.111492.2	CSNK1G2	0.924902	4.57e-05
MSTRG.112163.2	COPB2	0.916456	7.3e-05
MSTRG.113738.1	COL27A1	0.900303	0.000157874
MSTRG.113738.1	CPNE4	0.924294	4.74e-05
MSTRG.113738.1	CSF1	0.904647	0.000130032
MSTRG.113738.1	CUNH14orf105	0.922897	5.14e-05
MSTRG.114342.3	CPNE2	-0.928827	3.61e-05
MSTRG.114543.1	CNTF	0.906629	0.00011865
MSTRG.114543.1	CUNH3orf38	0.934747	2.47e-05
MSTRG.114731.5	COCH	0.905997	0.000122196
MSTRG.114731.5	CPNE8	0.922288	5.32e-05
MSTRG.114849.42	COL8A1	0.947407	9.52e-06
MSTRG.115520.46	CRTAP	0.950021	7.6e-06
MSTRG.115520.46	CUNH5orf58	0.926676	4.12e-05
MSTRG.115537.2	CPSF6	0.902123	0.000145704
MSTRG.115562.1	CSNK2A2	-0.920593	5.84e-05
MSTRG.115662.9	CUNH10orf71	0.915336	7.74e-05
MSTRG.115870.2	CSPG4	0.904956	0.000128203
MSTRG.116271.1	CUNH2orf66	0.928067	3.79e-05
MSTRG.116271.2	CUNH19orf71	0.956683	4.03e-06
MSTRG.116271.2	CUNH6orf136	0.902251	0.000144877
MSTRG.116276.1	CUNH2orf66	0.931006	3.15e-05
MSTRG.116345.11	CRYBB2	0.910666	9.78e-05
MSTRG.116433.17	CSTA	0.907405	0.000114411
MSTRG.116812.9	CUNH15orf65	0.997811	6.27e-12
MSTRG.118226.1	CUNH19orf44	0.930089	3.34e-05
MSTRG.118365.1	CUNH1orf210	0.920298	5.94e-05
MSTRG.118708.15	CUNH10orf53	0.963302	1.93e-06
MSTRG.118708.19	CTDSP1	0.984713	3.87e-08
MSTRG.119139.1	CUNH14orf37	0.939325	1.79e-05
MSTRG.123708.1	CSNK2A2	-0.921946	5.42e-05
MSTRG.123708.1	CUNH1orf43	0.906141	0.000121379
MSTRG.125629.5	CNTF	0.937525	2.04e-05
MSTRG.126530.14	CUNH14orf105	0.914885	7.92e-05
MSTRG.127128.7	CUNH10orf53	0.904051	0.000133609
MSTRG.127144.1	CRKL	-0.947891	9.14e-06
MSTRG.127144.1	CUNH19orf44	0.943096	1.35e-05
MSTRG.127144.1	CUNH5orf34	0.9038	0.000135141
MSTRG.127639.27	CUNH10orf76	-0.911939	9.19e-05
MSTRG.130197.1	COPS7B	0.925673	4.37e-05
MSTRG.130197.1	CSMD3	0.967499	1.12e-06
MSTRG.130197.1	CUNH14orf39	0.991991	2.13e-09
MSTRG.130197.1	CUNH1orf158	0.970617	7.17e-07
MSTRG.130197.1	CUNH21orf140	0.991991	2.13e-09
MSTRG.130197.1	CUNH21orf62	0.94539	1.12e-05
MSTRG.130679.3	CUNH1orf74	0.90707	0.000116228
MSTRG.130780.25	CUNH11orf88	0.901787	0.000147894
MSTRG.130959.16	CTNNB1	0.933978	2.6e-05
MSTRG.130959.16	CUNH11orf88	0.943098	1.35e-05
MSTRG.131825.13	COL8A1	0.97809	1.93e-07
MSTRG.132501.4	CUNH10orf105	0.933196	2.74e-05
MSTRG.132501.4	CUNH10orf53	0.99123	3.2e-09
MSTRG.132501.4	CUNH6orf58	0.964753	1.61e-06
MSTRG.132865.10	COL6A6	0.907357	0.00011467
MSTRG.132865.10	COPS7B	0.900096	0.000159302
MSTRG.132865.10	CSMD3	0.98155	8.97e-08
MSTRG.132865.10	CUNH14orf39	0.997079	2.29e-11
MSTRG.132865.10	CUNH1orf158	0.994901	2.81e-10
MSTRG.132865.10	CUNH21orf140	0.997079	2.29e-11
MSTRG.132865.10	CUNH21orf62	0.926389	4.19e-05
MSTRG.133113.1	CUNH19orf71	0.958905	3.19e-06
MSTRG.133113.1	CUNH6orf136	0.906135	0.000121413
MSTRG.133135.11	CSTA	0.929792	3.4e-05
MSTRG.133478.20	CTNNA3	0.927082	4.02e-05
MSTRG.133880.4	CSMD1	0.937451	2.05e-05
MSTRG.133880.4	CUNH5orf58	0.910859	9.69e-05
MSTRG.133880.4	CUNH8orf37	0.93114	3.13e-05
MSTRG.135280.1	CUNH14orf132	0.906481	0.000119472
MSTRG.135930.17	CUNH11orf88	0.928035	3.79e-05
MSTRG.135930.17	CUNH3orf70	0.919524	6.2e-05
MSTRG.136018.22	COBL	0.944657	1.19e-05
MSTRG.136018.22	CRYBG2	-0.900347	0.00015757
MSTRG.13608.16	COL10A1	0.903561	0.000136609
MSTRG.13622.6	COL12A1	0.931216	3.11e-05
MSTRG.137465.11	CRYBB2	0.936386	2.2e-05
MSTRG.138168.2	CUNH16orf62	0.928561	3.67e-05
MSTRG.138219.3	CRTAP	0.915477	7.68e-05
MSTRG.13852.6	CUNH10orf53	0.942899	1.37e-05
MSTRG.1393.3	CTDSP1	0.920307	5.94e-05
MSTRG.1393.3	CUNH10orf53	0.942484	1.41e-05
MSTRG.139942.29	CTDSP1	0.989571	6.97e-09
MSTRG.142570.1	CUNH1orf74	0.915096	7.83e-05
MSTRG.142571.2	CRLS1	0.91702	7.09e-05
MSTRG.143046.35	CUNH11orf88	0.961886	2.28e-06
MSTRG.143255.1	CTDSP1	0.915691	7.6e-05
MSTRG.143673.21	CPB1	0.901755	0.000148104
MSTRG.144940.14	CUNH11orf88	0.970315	7.5e-07
MSTRG.146389.19	CUNH19orf71	0.934532	2.5e-05
MSTRG.146468.1	CSMD3	0.912684	8.85e-05
MSTRG.146468.1	CSTA	0.917373	6.95e-05
MSTRG.146468.1	CUNH14orf37	0.916559	7.26e-05
MSTRG.146468.1	CUNH14orf39	0.901775	0.000147973
MSTRG.146468.1	CUNH21orf140	0.901775	0.000147973
MSTRG.148507.2	COPS7B	0.944354	1.22e-05
MSTRG.148961.2	CRACR2A	0.9149	7.91e-05
MSTRG.148961.2	CUNH14orf37	0.90174	0.000148202
MSTRG.14928.8	COL10A1	0.912097	9.12e-05
MSTRG.149308.4	CRYBB2	0.905774	0.000123464
MSTRG.149308.4	CUNH14orf2	0.909542	0.000103324
MSTRG.149626.1	CUNH10orf53	0.935062	2.41e-05
MSTRG.149862.3	CP	0.929244	3.52e-05
MSTRG.149862.3	CUNH11orf88	0.94953	7.93e-06
MSTRG.149862.3	CUNH14orf1	0.924378	4.72e-05
MSTRG.150645.41	COPS7B	0.926774	4.09e-05
MSTRG.150645.41	CSMD3	0.977856	2.03e-07
MSTRG.150645.41	CUNH14orf39	0.990755	4.06e-09
MSTRG.150645.41	CUNH1orf158	0.971543	6.22e-07
MSTRG.150645.41	CUNH21orf140	0.990755	4.06e-09
MSTRG.150645.41	CUNH21orf62	0.90764	0.00011315
MSTRG.152224.1	CTHRC1	0.92346	4.97e-05
MSTRG.152502.4	CUNH11orf16	0.904864	0.000128745
MSTRG.153395.5	CUNH10orf71	0.941326	1.54e-05
MSTRG.153395.5	CUNH11orf57	0.922082	5.38e-05
MSTRG.153424.20	CUNH2orf82	0.916855	7.15e-05
MSTRG.153699.2	CSNK2A2	-0.92706	4.02e-05
MSTRG.15473.38	CRYAA	0.910767	9.74e-05
MSTRG.155585.2	CUNH12orf4	-0.914422	8.11e-05
MSTRG.156449.3	COL8A1	0.933205	2.73e-05
MSTRG.157095.4	CSNK2A2	-0.909613	0.000102971
MSTRG.157134.2	CNTF	0.919644	6.16e-05
MSTRG.17454.1	CUNH10orf71	0.941275	1.55e-05
MSTRG.17539.17	CUNH11orf88	0.957165	3.83e-06
MSTRG.17539.17	CUNH14orf1	0.925764	4.35e-05
MSTRG.17545.11	CUNH10orf71	0.913618	8.45e-05
MSTRG.17545.11	CUNH11orf57	0.935699	2.31e-05
MSTRG.17703.16	COL8A1	0.978305	1.85e-07
MSTRG.17762.7	CPNE8	0.913595	8.46e-05
MSTRG.17762.7	CUNH14orf105	0.935408	2.36e-05
MSTRG.18269.3	CUNH1orf100	0.9589	3.19e-06
MSTRG.18305.46	CUNH15orf65	0.942938	1.36e-05
MSTRG.18390.2	CTHRC1	0.945929	1.08e-05
MSTRG.19569.10	CRKL	-0.908689	0.000107648
MSTRG.19569.10	CUNH19orf44	0.908444	0.000108915
MSTRG.19613.1	COBL	0.904749	0.000129423
MSTRG.19613.1	CRLS1	0.907204	0.000115499
MSTRG.20206.12	CUNH10orf53	0.910153	0.000100314
MSTRG.20405.8	CSMD3	0.911478	9.4e-05
MSTRG.20405.8	CUNH21orf62	0.93517	2.4e-05
MSTRG.21907.3	COL6A6	0.939986	1.71e-05
MSTRG.21907.3	CSMD3	0.942434	1.42e-05
MSTRG.21907.3	CSTA	0.904363	0.000131727
MSTRG.21907.3	CUNH14orf37	0.904385	0.000131596
MSTRG.21907.3	CUNH14orf39	0.940387	1.66e-05
MSTRG.21907.3	CUNH1orf158	0.911371	9.45e-05
MSTRG.21907.3	CUNH21orf140	0.940387	1.66e-05
MSTRG.21927.58	CPED1	0.912586	8.9e-05
MSTRG.24262.18	CUNH19orf71	0.925501	4.42e-05
MSTRG.24502.8	CNTF	0.919352	6.25e-05
MSTRG.24502.8	CUNH14orf2	0.919043	6.36e-05
MSTRG.24532.14	CRTAP	0.904114	0.000133227
MSTRG.24532.14	CUNH5orf58	0.923047	5.09e-05
MSTRG.24790.2	COL6A6	0.904196	0.000132735
MSTRG.24790.2	COPS7B	0.947245	9.65e-06
MSTRG.24790.2	CSMD3	0.978223	1.88e-07
MSTRG.24790.2	CUNH14orf39	0.995544	1.53e-10
MSTRG.24790.2	CUNH1orf158	0.975554	3.16e-07
MSTRG.24790.2	CUNH21orf140	0.995544	1.53e-10
MSTRG.24790.2	CUNH21orf62	0.9376	2.03e-05
MSTRG.25720.1	CRIM1	0.941131	1.57e-05
MSTRG.25742.1	COPS3	-0.910542	9.84e-05
MSTRG.25742.1	CRKL	-0.942679	1.39e-05
MSTRG.25742.1	CUNH19orf44	0.963174	1.96e-06
MSTRG.26082.32	CREM	0.962238	2.19e-06
MSTRG.2680.20	CUNH1orf74	0.910608	9.81e-05
MSTRG.30251.4	CRYBB2	0.908562	0.000108302
MSTRG.33274.1	CTSD	-0.917125	7.05e-05
MSTRG.3338.5	CRYGN	0.91579	7.56e-05
MSTRG.3338.5	CUL5	0.978183	1.9e-07
MSTRG.3338.5	CUNH14orf105	0.906628	0.000118658
MSTRG.34052.1	CNTF	0.900207	0.000158535
MSTRG.34997.3	CNTF	0.9216	5.53e-05
MSTRG.35016.6	CUNH19orf71	0.901687	0.000148555
MSTRG.35791.1	CSTA	0.952489	6.07e-06
MSTRG.36087.27	COPS7B	0.953772	5.38e-06
MSTRG.36087.27	CSMD3	0.947325	9.58e-06
MSTRG.36087.27	CUNH14orf39	0.958644	3.28e-06
MSTRG.36087.27	CUNH1orf158	0.935441	2.35e-05
MSTRG.36087.27	CUNH21orf140	0.958644	3.28e-06
MSTRG.36949.1	CTSD	-0.920337	5.93e-05
MSTRG.39457.4	CUNH11orf57	0.925425	4.44e-05
MSTRG.39495.41	CRYBB2	0.948581	8.61e-06
MSTRG.39495.41	CUNH14orf2	0.984979	3.57e-08
MSTRG.40535.1	CTNNB1	0.944445	1.21e-05
MSTRG.42038.27	CUNH10orf53	0.970625	7.16e-07
MSTRG.42038.27	CUNH6orf58	0.912853	8.78e-05
MSTRG.42467.1	CRIM1	0.926533	4.15e-05
MSTRG.42536.22	COL8A1	0.904599	0.000130317
MSTRG.42561.1	CNTF	0.938529	1.9e-05
MSTRG.42588.1	CNTF	0.912112	9.11e-05
MSTRG.42668.10	CPLX2	0.900499	0.000156525
MSTRG.42668.10	CRYBA4	0.995016	2.53e-10
MSTRG.42668.10	CUNH21orf33	0.956176	4.24e-06
MSTRG.44791.6	CTNNA3	0.912889	8.76e-05
MSTRG.46149.3	CSTA	0.964741	1.61e-06
MSTRG.46149.3	CUNH14orf39	0.908437	0.000108951
MSTRG.46149.3	CUNH21orf140	0.908437	0.000108951
MSTRG.46310.9	CSMD1	0.946698	1.01e-05
MSTRG.4853.1	CRACR2A	0.903527	0.000136818
MSTRG.4853.1	CRLF2	0.921732	5.48e-05
MSTRG.4853.1	CUNH3orf38	0.927545	3.91e-05
MSTRG.4895.4	CUNH1orf43	0.914397	8.12e-05
MSTRG.4896.2	CUNH5orf49	0.902072	0.000146035
MSTRG.49873.19	CUNH1orf100	0.920497	5.87e-05
MSTRG.52159.2	CRISPLD1	-0.902026	0.000146335
MSTRG.52706.57	CRYZ	0.919089	6.34e-05
MSTRG.52782.4	CP	0.914433	8.1e-05
MSTRG.53059.1	CUNH22orf39	-0.916146	7.42e-05
MSTRG.53869.1	CUL5	0.923056	5.09e-05
MSTRG.5507.1	CNTF	0.939549	1.76e-05
MSTRG.56127.5	CUNH15orf65	0.949574	7.9e-06
MSTRG.57017.1	COQ6	0.908621	0.000107996
MSTRG.57017.1	CUNH12orf73	0.904173	0.000132874
MSTRG.57588.1	CUNH5orf42	0.903916	0.00013443
MSTRG.58374.18	CPB2	0.915266	7.76e-05
MSTRG.58374.18	CTRC	0.930555	3.24e-05
MSTRG.58524.23	COQ10B	0.907539	0.00011369
MSTRG.60250.4	CUNH11orf57	0.924363	4.72e-05
MSTRG.60396.2	CREB1	0.905028	0.000127781
MSTRG.60396.2	CTDSP1	0.980367	1.18e-07
MSTRG.61406.8	COPS7B	0.933262	2.72e-05
MSTRG.61406.8	CSMD3	0.942367	1.43e-05
MSTRG.61406.8	CUNH14orf39	0.938744	1.87e-05
MSTRG.61406.8	CUNH1orf158	0.912203	9.07e-05
MSTRG.61406.8	CUNH21orf140	0.938744	1.87e-05
MSTRG.61406.8	CUNH21orf62	0.92335	5e-05
MSTRG.62144.6	CUNH11orf88	0.9172	7.02e-05
MSTRG.62144.6	CUNH3orf70	0.924731	4.62e-05
MSTRG.62497.6	CUNH1orf168	0.903507	0.000136939
MSTRG.62497.6	CUNH3orf67	0.913349	8.56e-05
MSTRG.62759.1	COL8A1	0.901851	0.000147474
MSTRG.62992.2	CUNH1orf167	0.901459	0.000150059
MSTRG.63796.1	CUNH19orf44	0.917385	6.95e-05
MSTRG.64218.2	CUNH19orf71	0.900159	0.000158866
MSTRG.64218.2	CUNH6orf136	0.906661	0.000118474
MSTRG.64269.1	CUNH1orf74	0.908933	0.000106398
MSTRG.64439.1	CRIM1	0.914652	8.01e-05
MSTRG.64620.1	CREB1	0.907784	0.00011238
MSTRG.64620.1	CTDSP1	0.975915	2.95e-07
MSTRG.65156.30	CNOT2	0.91225	9.05e-05
MSTRG.65445.2	CRACR2B	0.914168	8.21e-05
MSTRG.65445.2	CUL4A	0.970467	7.33e-07
MSTRG.65445.2	CUNH12orf57	-0.952872	5.86e-06
MSTRG.66082.2	CTDSP1	0.931899	2.98e-05
MSTRG.6700.5	COQ6	0.931243	3.1e-05
MSTRG.6700.5	CPB1	0.92401	4.82e-05
MSTRG.6700.5	CTHRC1	0.916782	7.18e-05
MSTRG.6700.5	CUNH20orf196	0.905592	0.000124507
MSTRG.67094.1	COMP	0.908428	0.000108995
MSTRG.67244.54	CUNH10orf53	0.962263	2.18e-06
MSTRG.67244.54	CUNH6orf58	0.973247	4.72e-07
MSTRG.68052.50	CNTF	0.950006	7.61e-06
MSTRG.70707.1	CUNH1orf43	0.947863	9.16e-06
MSTRG.73345.87	COL8A1	0.918034	6.71e-05
MSTRG.7376.2	CTNNB1	0.900132	0.000159057
MSTRG.73853.29	CUNH1orf167	-0.9048	0.000129124
MSTRG.73855.1	CREB1	0.931608	3.03e-05
MSTRG.73855.1	CTDSP1	0.953059	5.75e-06
MSTRG.73907.1	CUNH11orf57	0.932342	2.89e-05
MSTRG.75004.21	CUNH15orf65	0.99763	8.95e-12
MSTRG.75233.3	COL8A1	0.959038	3.14e-06
MSTRG.76725.9	CPB2	0.955838	4.39e-06
MSTRG.76725.9	CTRC	0.914029	8.27e-05
MSTRG.76935.2	CRYBB2	0.9388	1.86e-05
MSTRG.78678.1	CNTF	0.928992	3.58e-05
MSTRG.78678.1	CTSD	-0.902703	0.000141983
MSTRG.80043.1	CUNH6orf89	0.903735	0.000135536
MSTRG.80614.1	COCH	0.905932	0.000122564
MSTRG.80614.1	CUNH6orf106	0.903228	0.000138676
MSTRG.80997.1	CNTF	0.92082	5.77e-05
MSTRG.81.6	CPNE4	0.927074	4.02e-05
MSTRG.81292.4	CUL1	0.901909	0.000147096
MSTRG.81669.25	CRYBB2	0.942684	1.39e-05
MSTRG.81669.25	CUNH14orf2	0.93721	2.08e-05
MSTRG.82272.3	CNTF	0.911592	9.35e-05
MSTRG.82450.3	CUNH14orf105	0.915446	7.69e-05
MSTRG.82987.2	COCH	0.930154	3.33e-05
MSTRG.82987.2	CUNH14orf105	0.94343	1.31e-05
MSTRG.82987.2	CUNH6orf106	0.919443	6.22e-05
MSTRG.84291.1	CRACR2A	0.960776	2.59e-06
MSTRG.84442.19	COL8A1	0.959536	2.98e-06
MSTRG.84519.24	CTHRC1	0.915575	7.64e-05
MSTRG.84605.1	CNTF	0.944215	1.24e-05
MSTRG.85910.2	CPB1	0.94315	1.34e-05
MSTRG.85910.2	CTHRC1	0.960094	2.8e-06
MSTRG.86106.159	CUNH10orf90	-0.904151	0.000133006
MSTRG.86284.1	CRLS1	0.901549	0.000149465
MSTRG.88426.2	CNTF	0.903741	0.000135501
MSTRG.89989.31	CUNH10orf53	0.96669	1.25e-06
MSTRG.90680.3	CRYBB2	0.948528	8.65e-06
MSTRG.90680.3	CUNH14orf2	0.93811	1.95e-05
MSTRG.91046.28	COCH	0.900415	0.000157101
MSTRG.91046.28	CPNE8	0.942273	1.44e-05
MSTRG.91046.28	CUNH12orf57	-0.903782	0.000135249
MSTRG.91046.28	CUNH14orf105	0.920709	5.81e-05
MSTRG.91046.31	CREM	0.901752	0.000148129
MSTRG.91503.8	COL8A1	0.922157	5.36e-05
MSTRG.92813.1	CRB2	0.907034	0.000116422
MSTRG.93537.11	COL8A1	0.985195	3.35e-08
MSTRG.93756.4	CP	0.922562	5.23e-05
MSTRG.93756.4	CTH	0.909833	0.000101881
MSTRG.93756.4	CUNH11orf88	0.970879	6.89e-07
MSTRG.93756.4	CUNH14orf1	0.937083	2.1e-05
MSTRG.93757.3	CUNH1orf74	0.954871	4.83e-06
MSTRG.94558.10	CRY1	0.917051	7.07e-05
MSTRG.94558.4	COPS7B	0.919093	6.34e-05
MSTRG.96061.37	CSMD1	0.957878	3.56e-06
MSTRG.96061.37	CUNH8orf37	0.91433	8.15e-05
MSTRG.97521.1	COL21A1	-0.912048	9.14e-05
MSTRG.98656.3	CTDSP1	0.984915	3.64e-08
MSTRG.100603.49	DNAJB8	0.991797	2.37e-09
MSTRG.101075.1	DHRS9	0.938605	1.89e-05
MSTRG.101512.1	DNAJC19	0.936724	2.15e-05
MSTRG.102499.2	DEXI	0.975452	3.21e-07
MSTRG.102499.2	DMRTB1	0.974445	3.85e-07
MSTRG.102499.2	DRC3	0.920277	5.95e-05
MSTRG.103771.1	DEF8	-0.92471	4.63e-05
MSTRG.105256.123	DMRTB1	0.957595	3.67e-06
MSTRG.105256.45	DEXI	0.928564	3.67e-05
MSTRG.105256.45	DMRTB1	0.998429	1.41e-12
MSTRG.106024.24	DERL1	0.912851	8.78e-05
MSTRG.108315.2	DSCR3	0.907703	0.000112812
MSTRG.108527.11	CUNHXorf65	0.946108	1.06e-05
MSTRG.108527.11	DHX37	0.937861	1.99e-05
MSTRG.109646.2	DEXI	0.901109	0.000152392
MSTRG.109646.2	DMRTB1	0.971057	6.7e-07
MSTRG.110227.2	DNAH17	0.927051	4.03e-05
MSTRG.111366.3	CUNH8orf88	0.921155	5.66e-05
MSTRG.111366.3	DDX24	0.91563	7.62e-05
MSTRG.111406.38	DOK3	0.999166	8.17e-14
MSTRG.111492.2	DNM1L	0.907127	0.000115914
MSTRG.111826.18	CUNH9orf142	-0.929408	3.49e-05
MSTRG.11309.16	DRD2	0.91664	7.23e-05
MSTRG.113663.11	DMRTB1	0.947635	9.34e-06
MSTRG.113738.1	CYTL1	0.941085	1.57e-05
MSTRG.113738.1	DIO3	0.925899	4.31e-05
MSTRG.113738.1	DPY30	0.910863	9.69e-05
MSTRG.113738.1	DRAM1	0.95026	7.44e-06
MSTRG.114063.1	DDX51	0.904025	0.000133771
MSTRG.114064.1	DDX51	0.926663	4.12e-05
MSTRG.114543.1	DENND1B	0.926131	4.26e-05
MSTRG.114543.1	DOK4	0.910949	9.65e-05
MSTRG.114665.14	DHX37	0.906801	0.000117701
MSTRG.114731.5	DKC1	0.92047	5.88e-05
MSTRG.114731.5	DPY30	0.907982	0.00011133
MSTRG.114849.42	DHRS9	0.926025	4.28e-05
MSTRG.114891.54	DEUP1	0.902826	0.0001412
MSTRG.114891.54	DNAH7	0.946146	1.06e-05
MSTRG.114891.54	DTHD1	0.91973	6.13e-05
MSTRG.114923.1	DHRS9	0.973205	4.75e-07
MSTRG.115520.46	DHX37	0.932403	2.88e-05
MSTRG.115537.2	DEXI	0.902629	0.000142456
MSTRG.115571.3	DDIT4	0.904422	0.00013137
MSTRG.116271.2	DNAH14	0.941861	1.48e-05
MSTRG.116345.11	DEXI	0.911717	9.29e-05
MSTRG.116345.11	DMRTB1	0.922361	5.29e-05
MSTRG.116812.9	DOK3	0.997811	6.27e-12
MSTRG.117449.2	DHCR7	0.914484	8.08e-05
MSTRG.118365.1	DEF8	0.915282	7.76e-05
MSTRG.118708.15	DNAJC19	0.907114	0.000115986
MSTRG.120012.1	DNAJC16	-0.938584	1.89e-05
MSTRG.121917.1	DHRS9	0.915773	7.56e-05
MSTRG.122783.1	DCUN1D3	0.924674	4.64e-05
MSTRG.123762.2	DLL4	0.933224	2.73e-05
MSTRG.123762.2	DOLK	0.901904	0.00014713
MSTRG.125629.5	DMRTB1	0.936798	2.14e-05
MSTRG.125629.5	DRC3	0.906376	0.000120061
MSTRG.126530.14	CYTL1	0.922678	5.2e-05
MSTRG.126530.14	DIO3	0.914366	8.13e-05
MSTRG.127128.6	DNAJC13	0.915571	7.64e-05
MSTRG.130197.1	DNAJB8	0.991991	2.13e-09
MSTRG.130567.2	DIP2C	-0.902341	0.000144299
MSTRG.130780.25	DDX24	0.90256	0.000142896
MSTRG.130780.25	DDX55	0.917225	7.01e-05
MSTRG.130780.25	DTHD1	0.905381	0.000125724
MSTRG.130959.16	DHCR7	0.92596	4.3e-05
MSTRG.130959.16	DIMT1	0.909673	0.000102671
MSTRG.130959.16	DTHD1	0.911745	9.28e-05
MSTRG.130997.1	CUNH9orf78	0.918699	6.48e-05
MSTRG.131288.55	CUNHXorf65	0.98961	6.85e-09
MSTRG.132501.4	DNAJB13	0.907631	0.000113197
MSTRG.132501.4	DNAJC19	0.92791	3.82e-05
MSTRG.132865.10	DNAJB8	0.997079	2.29e-11
MSTRG.133113.1	DNAH14	0.970148	7.69e-07
MSTRG.133113.1	DRD2	0.916786	7.17e-05
MSTRG.133456.1	DEXI	0.942368	1.43e-05
MSTRG.133456.1	DMRTB1	0.989165	8.27e-09
MSTRG.1337.1	CUNHXorf65	0.905023	0.000127808
MSTRG.1337.1	DDHD1	0.916386	7.33e-05
MSTRG.133880.4	CUNHXorf65	0.934708	2.47e-05
MSTRG.134307.21	DTX1	0.932955	2.78e-05
MSTRG.135077.1	DCAF4	0.932387	2.88e-05
MSTRG.135930.17	DTHD1	0.922462	5.26e-05
MSTRG.136018.22	CYTH3	0.928495	3.69e-05
MSTRG.13622.6	DTX3L	-0.923925	4.84e-05
MSTRG.137465.11	DEXI	0.943334	1.32e-05
MSTRG.137465.11	DMRTB1	0.923738	4.89e-05
MSTRG.138168.2	CUNHXorf65	0.910325	9.95e-05
MSTRG.13852.6	DNAJC19	0.922036	5.39e-05
MSTRG.139385.3	DDX25	0.900017	0.00015985
MSTRG.139924.1	DAB1	0.92035	5.92e-05
MSTRG.140078.13	DHX37	0.930273	3.3e-05
MSTRG.140090.3	DEAF1	-0.921079	5.69e-05
MSTRG.140173.19	CYTH4	0.910449	9.89e-05
MSTRG.14034.3	DDX20	0.907641	0.000113143
MSTRG.142571.2	DHX57	-0.909448	0.000103797
MSTRG.142571.2	DIS3L	0.953687	5.42e-06
MSTRG.142573.14	DHRS9	0.955532	4.53e-06
MSTRG.143046.35	DIMT1	0.915565	7.65e-05
MSTRG.143046.35	DTHD1	0.900432	0.000156989
MSTRG.143673.21	DLAT	0.902968	0.000140308
MSTRG.144890.1	DNAJC18	0.929743	3.41e-05
MSTRG.144940.14	DTHD1	0.923802	4.88e-05
MSTRG.145704.1	DLL4	0.91195	9.18e-05
MSTRG.146389.19	DNAH14	0.955678	4.46e-06
MSTRG.146468.1	DNAJB8	0.901775	0.000147973
MSTRG.147297.12	DBT	0.946377	1.04e-05
MSTRG.14871.1	DNAJC16	-0.915876	7.52e-05
MSTRG.149082.7	DNAH3	-0.900275	0.000158064
MSTRG.149308.4	DEXI	0.929838	3.39e-05
MSTRG.149308.4	DMRTB1	0.997999	4.19e-12
MSTRG.149862.3	DIMT1	0.921501	5.56e-05
MSTRG.149862.3	DMRT3	0.911432	9.42e-05
MSTRG.149862.3	DTHD1	0.969658	8.27e-07
MSTRG.150645.41	DNAJB8	0.990755	4.06e-09
MSTRG.151642.31	DGKB	0.90556	0.000124691
MSTRG.152224.1	DDX31	0.94804	9.02e-06
MSTRG.153424.18	DEAF1	0.90538	0.000125731
MSTRG.153789.3	DHX37	0.911254	9.51e-05
MSTRG.154980.1	DAB1	0.907001	0.000116602
MSTRG.154980.1	DKC1	0.916384	7.33e-05
MSTRG.155197.2	DBT	0.930904	3.17e-05
MSTRG.15536.1	DGKB	0.921049	5.7e-05
MSTRG.156558.1	DSE	0.952899	5.84e-06
MSTRG.157095.1	DERL1	0.904464	0.000131119
MSTRG.157095.4	DIRAS1	0.944853	1.17e-05
MSTRG.157134.2	DEXI	0.921883	5.44e-05
MSTRG.157134.2	DMRTB1	0.976422	2.69e-07
MSTRG.157134.2	DRC3	0.92494	4.56e-05
MSTRG.17539.17	DNAH7	0.909986	0.000101129
MSTRG.17539.17	DTHD1	0.97284	5.05e-07
MSTRG.17703.16	DHRS9	0.919902	6.07e-05
MSTRG.17762.7	CYTL1	0.943294	1.33e-05
MSTRG.17762.7	DET1	0.923446	4.98e-05
MSTRG.17762.7	DIO3	0.94966	7.84e-06
MSTRG.17762.7	DPY30	0.943864	1.27e-05
MSTRG.17762.7	DRAM1	0.95696	3.92e-06
MSTRG.17762.7	DSEL	0.947407	9.52e-06
MSTRG.18305.46	DOK3	0.942938	1.36e-05
MSTRG.18390.2	DDX31	0.920772	5.79e-05
MSTRG.18676.1	DRAM1	0.929295	3.51e-05
MSTRG.19476.8	DBT	0.920117	6e-05
MSTRG.19569.10	DNAJC14	0.944303	1.23e-05
MSTRG.19613.1	CXXC5	0.939277	1.8e-05
MSTRG.19613.1	CYTL1	0.916717	7.2e-05
MSTRG.19613.1	DIS3L	0.96847	9.82e-07
MSTRG.19984.1	DHX36	0.94038	1.66e-05
MSTRG.19984.1	DNAH10	0.911075	9.59e-05
MSTRG.20206.12	DNAJB13	0.904371	0.000131676
MSTRG.21907.3	DNAJB8	0.940387	1.66e-05
MSTRG.22294.1	DNAJB13	0.921941	5.42e-05
MSTRG.24262.18	DNAH14	0.905163	0.000126993
MSTRG.24262.18	DRD2	0.901643	0.000148843
MSTRG.24469.1	DHRS9	0.901471	0.00014998
MSTRG.24502.8	DEXI	0.91728	6.99e-05
MSTRG.24502.8	DMRTB1	0.975861	2.98e-07
MSTRG.24502.8	DRC3	0.929505	3.46e-05
MSTRG.24532.14	DHX37	0.959791	2.9e-06
MSTRG.24790.2	DNAJB8	0.995544	1.53e-10
MSTRG.25503.4	DENND6B	0.915692	7.6e-05
MSTRG.25720.1	DENR	0.922508	5.25e-05
MSTRG.25742.1	DEF6	0.910756	9.74e-05
MSTRG.25742.1	DENND1B	0.941737	1.5e-05
MSTRG.25742.1	DOK4	0.914172	8.21e-05
MSTRG.25762.10	CXCL13	0.909207	0.000105004
MSTRG.26082.32	DNAJC18	0.905927	0.000122589
MSTRG.26782.33	DDX25	0.943394	1.32e-05
MSTRG.2688.1	DHRS9	0.964846	1.59e-06
MSTRG.27215.99	DBT	0.917199	7.02e-05
MSTRG.29294.7	DBT	0.911824	9.24e-05
MSTRG.30251.4	DEXI	0.945731	1.09e-05
MSTRG.30251.4	DMRTB1	0.99533	1.89e-10
MSTRG.31655.5	DDX46	0.922609	5.22e-05
MSTRG.33288.13	CYR61	0.900901	0.000153789
MSTRG.33962.2	DBF4B	0.935502	2.34e-05
MSTRG.34052.1	DENND1B	0.907034	0.000116425
MSTRG.34052.1	DOK4	0.912949	8.74e-05
MSTRG.34377.1	DTHD1	0.916663	7.22e-05
MSTRG.3530.30	DKC1	0.906005	0.000122146
MSTRG.36087.27	DNAJB8	0.958644	3.28e-06
MSTRG.39495.41	DMRTB1	0.96385	1.8e-06
MSTRG.40547.1	DNAJB13	0.909657	0.00010275
MSTRG.4137.3	DDB2	0.901117	0.00015234
MSTRG.41962.15	DNAJC16	-0.902105	0.000145824
MSTRG.42038.27	DNAJC19	0.912426	8.97e-05
MSTRG.42330.1	DHRS9	0.927456	3.93e-05
MSTRG.42403.1	CUNH9orf85	0.904237	0.000132482
MSTRG.42403.1	DAPP1	0.923477	4.97e-05
MSTRG.42403.1	DRC3	0.913575	8.47e-05
MSTRG.42668.10	CXCL13	0.987909	1.35e-08
MSTRG.43016.1	DDX25	0.930228	3.31e-05
MSTRG.43516.15	DCP2	-0.901945	0.000146861
MSTRG.43728.1	DHRS9	0.922336	5.3e-05
MSTRG.43996.7	DBT	0.966189	1.34e-06
MSTRG.44791.6	DGKI	0.921582	5.53e-05
MSTRG.44791.6	DHX30	0.945306	1.13e-05
MSTRG.44791.6	DNAJA3	0.914858	7.93e-05
MSTRG.44791.6	DSCR3	0.914905	7.91e-05
MSTRG.45091.6	DEXI	0.925171	4.5e-05
MSTRG.45091.6	DRC3	0.940231	1.67e-05
MSTRG.45782.1	DDX51	0.925499	4.42e-05
MSTRG.46149.3	DNAJB8	0.908437	0.000108951
MSTRG.4691.35	CUX2	-0.901942	0.000146885
MSTRG.4853.1	DGKK	0.90032	0.000157758
MSTRG.49731.14	DIS3L2	0.921035	5.7e-05
MSTRG.5048.1	DNALI1	0.95442	5.05e-06
MSTRG.50629.1	CYFIP2	-0.915556	7.65e-05
MSTRG.50629.1	DOLK	0.90707	0.000116224
MSTRG.51962.1	DAPK3	0.939105	1.82e-05
MSTRG.52158.1	DESI1	0.914933	7.9e-05
MSTRG.52159.2	DAPK3	0.904168	0.000132904
MSTRG.52497.2	DNAH9	0.909061	0.000105744
MSTRG.52559.1	DDX41	-0.911586	9.35e-05
MSTRG.52782.4	DEUP1	0.942014	1.47e-05
MSTRG.52782.4	DTHD1	0.90643	0.000119759
MSTRG.53846.5	DLL4	0.919905	6.07e-05
MSTRG.5507.1	DRC3	0.936177	2.24e-05
MSTRG.55338.39	DBT	0.944178	1.24e-05
MSTRG.55338.4	DDO	0.949171	8.18e-06
MSTRG.55338.4	DNAJB13	0.961463	2.4e-06
MSTRG.56127.5	DOK3	0.949574	7.9e-06
MSTRG.56851.28	DHRS9	0.924273	4.75e-05
MSTRG.58298.1	DEGS1	0.918894	6.41e-05
MSTRG.58524.23	DCAF6	0.901399	0.000150459
MSTRG.60208.2	DERL1	0.940503	1.64e-05
MSTRG.60345.1	CUNH9orf78	0.941566	1.52e-05
MSTRG.61406.8	DNAJB8	0.938744	1.87e-05
MSTRG.62144.6	DIMT1	0.903285	0.000138318
MSTRG.62144.6	DTHD1	0.946438	1.03e-05
MSTRG.62497.6	DAPP1	0.9645	1.66e-06
MSTRG.63248.5	DIDO1	0.933487	2.68e-05
MSTRG.63796.1	DEF6	0.9007	0.000155153
MSTRG.63975.1	DDX25	-0.901283	0.00015123
MSTRG.64218.2	DGKQ	0.910784	9.73e-05
MSTRG.64439.1	DENR	0.90677	0.000117874
MSTRG.65445.2	DNAJC7	0.901403	0.000150428
MSTRG.65610.10	DDX58	0.916654	7.22e-05
MSTRG.66071.22	DHX37	0.930644	3.23e-05
MSTRG.66211.18	DNAAF4	-0.936097	2.25e-05
MSTRG.6700.5	DAZL	0.948731	8.5e-06
MSTRG.67067.9	DTNA	0.902079	0.000145989
MSTRG.67094.1	DKK1	0.917981	6.73e-05
MSTRG.67187.23	DKC1	0.935205	2.39e-05
MSTRG.67244.54	DNAH10	0.911565	9.36e-05
MSTRG.67244.54	DNAJC19	0.908611	0.000108051
MSTRG.71250.3	DEXI	0.955616	4.49e-06
MSTRG.71250.3	DGKB	0.902561	0.000142884
MSTRG.71250.3	DMRTB1	0.942668	1.39e-05
MSTRG.71250.3	DRC3	0.902965	0.000140324
MSTRG.71762.2	CYTL1	0.927952	3.81e-05
MSTRG.71762.2	DRAM1	0.948625	8.58e-06
MSTRG.72425.1	DDX46	0.911495	9.39e-05
MSTRG.74004.3	DHX30	0.91326	8.6e-05
MSTRG.75004.21	DOK3	0.99763	8.95e-12
MSTRG.75592.3	DAPP1	0.906824	0.000117573
MSTRG.76727.6	DHODH	0.911148	9.55e-05
MSTRG.77087.1	CUX1	-0.922579	5.23e-05
MSTRG.77087.1	CWC27	-0.919744	6.12e-05
MSTRG.77999.2	DENND6B	0.918237	6.64e-05
MSTRG.80614.1	DPY30	0.903089	0.000139544
MSTRG.81292.4	CUNH8orf88	0.901405	0.000150415
MSTRG.81292.4	DDX24	0.942108	1.45e-05
MSTRG.81669.25	DMRTB1	0.920598	5.84e-05
MSTRG.82450.3	DIO3	0.915507	7.67e-05
MSTRG.82450.3	DPY30	0.907282	0.000115075
MSTRG.82702.39	DCAF4	0.909225	0.000104918
MSTRG.82779.1	DNAAF5	0.914569	8.05e-05
MSTRG.82987.2	CYTL1	0.94133	1.54e-05
MSTRG.82987.2	DET1	0.909112	0.000105485
MSTRG.82987.2	DIO3	0.945421	1.12e-05
MSTRG.82987.2	DPY30	0.949952	7.64e-06
MSTRG.82987.2	DRAM1	0.916943	7.11e-05
MSTRG.83014.11	DEXI	0.904569	0.000130494
MSTRG.83014.11	DMRTB1	0.963635	1.85e-06
MSTRG.84442.19	DHRS9	0.929836	3.39e-05
MSTRG.84442.26	DNM1L	0.902894	0.000140769
MSTRG.84519.24	DDX31	0.902491	0.000143335
MSTRG.84519.24	DSCR3	0.904008	0.000133873
MSTRG.84601.26	DNAJC16	-0.927581	3.9e-05
MSTRG.84605.1	DRC3	0.911421	9.43e-05
MSTRG.84605.38	DMRTB1	0.960839	2.57e-06
MSTRG.85910.2	DGKI	0.902235	0.000144978
MSTRG.86106.159	DGUOK	-0.922399	5.28e-05
MSTRG.86189.5	DEXI	0.914449	8.1e-05
MSTRG.86189.5	DRC3	0.908698	0.000107599
MSTRG.89495.2	DNM1	0.900079	0.000159421
MSTRG.89989.31	DNAJC19	0.9338	2.63e-05
MSTRG.91046.28	DDX4	0.944778	1.18e-05
MSTRG.91046.28	DIO3	0.915948	7.5e-05
MSTRG.91046.28	DNAJC7	0.933378	2.7e-05
MSTRG.91046.31	DNAJC18	0.941663	1.5e-05
MSTRG.92790.1	DDX46	0.910705	9.76e-05
MSTRG.93756.4	DMRT3	0.909595	0.00010306
MSTRG.93756.4	DTHD1	0.975072	3.44e-07
MSTRG.93772.8	DAPP1	0.920244	5.96e-05
MSTRG.93772.8	DGKB	0.902639	0.00014239
MSTRG.93939.1	DHX57	-0.915417	7.7e-05
MSTRG.94558.10	DTX3L	-0.91634	7.34e-05
MSTRG.94633.68	DCAF4	0.917826	6.79e-05
MSTRG.94637.1	DNM1L	0.932767	2.81e-05
MSTRG.95728.82	DHRS9	0.959278	3.06e-06
MSTRG.100021.1	ENOX2	0.902718	0.000141884
MSTRG.100208.32	EXOC8	0.900548	0.000156194
MSTRG.102168.1	F8	0.90433	0.000131924
MSTRG.102499.2	ERICH6B	0.927336	3.96e-05
MSTRG.102499.2	ESYT3	0.964824	1.6e-06
MSTRG.105256.123	ESYT3	0.90263	0.00014245
MSTRG.105256.45	ERICH6B	0.924001	4.82e-05
MSTRG.105256.45	ESYT3	0.968767	9.41e-07
MSTRG.105256.66	ELMOD1	0.962261	2.18e-06
MSTRG.105256.66	ENOX2	0.92087	5.75e-05
MSTRG.106021.2	ERICH6B	0.981428	9.24e-08
MSTRG.108069.1	ELMOD1	0.918032	6.71e-05
MSTRG.108069.1	ENOX2	0.933122	2.75e-05
MSTRG.108247.1	ELP3	-0.90246	0.000143534
MSTRG.108315.2	EDRF1	0.924739	4.62e-05
MSTRG.108315.2	F2	0.917471	6.92e-05
MSTRG.108527.11	EGLN3	0.941525	1.52e-05
MSTRG.108969.1	ERLIN1	-0.901834	0.000147591
MSTRG.109063.64	EBF1	0.912204	9.07e-05
MSTRG.109646.2	ERICH6B	0.923052	5.09e-05
MSTRG.109646.2	ESYT3	0.938632	1.88e-05
MSTRG.110831.1	EIF4H	0.924564	4.67e-05
MSTRG.111366.3	EPAS1	0.902049	0.000146187
MSTRG.113738.1	EAF1	0.931032	3.15e-05
MSTRG.113738.1	EGR1	0.905876	0.00012288
MSTRG.113738.1	EOMES	0.934753	2.47e-05
MSTRG.113738.1	FAM117B	0.921332	5.61e-05
MSTRG.114063.1	EXOC8	0.955912	4.36e-06
MSTRG.114064.1	EHD4	0.919882	6.08e-05
MSTRG.114665.14	EGLN3	0.948457	8.71e-06
MSTRG.114849.42	DUSP28	0.911149	9.55e-05
MSTRG.114849.42	ELMOD1	0.976483	2.65e-07
MSTRG.114849.42	ENOX2	0.973901	4.23e-07
MSTRG.114891.54	ERICH6	0.9525	6.06e-06
MSTRG.114923.1	ELMOD1	0.900665	0.000155393
MSTRG.115520.46	EGLN3	0.912018	9.15e-05
MSTRG.115537.2	EFCAB11	0.944602	1.2e-05
MSTRG.115546.27	F5	0.904066	0.000133521
MSTRG.115562.1	EMSY	-0.901365	0.000150683
MSTRG.115870.2	F8	0.966019	1.37e-06
MSTRG.116271.2	EIF4E1B	0.956683	4.03e-06
MSTRG.116345.11	ERICH6B	0.964401	1.68e-06
MSTRG.116345.11	ESYT3	0.914912	7.91e-05
MSTRG.117449.2	EXOSC7	0.904636	0.000130098
MSTRG.118204.1	EVPL	0.902497	0.000143294
MSTRG.118365.1	ENTPD8	0.903654	0.000136038
MSTRG.118365.1	EZR	0.920757	5.79e-05
MSTRG.120158.1	FAIM2	0.906962	0.000116815
MSTRG.122783.1	EHD3	0.910166	0.000100247
MSTRG.123708.1	EN1	0.902365	0.000144141
MSTRG.123863.1	EIF4H	0.975145	3.4e-07
MSTRG.123963.36	EIF4H	0.906886	0.000117233
MSTRG.125734.1	EGR3	0.932032	2.95e-05
MSTRG.126530.14	EOMES	0.913411	8.54e-05
MSTRG.126530.14	ETFDH	0.913222	8.62e-05
MSTRG.127144.1	FAAH2	0.911706	9.3e-05
MSTRG.130588.12	EBAG9	0.946495	1.03e-05
MSTRG.130959.16	DUSP22	0.921194	5.65e-05
MSTRG.130959.16	EAF2	0.952442	6.1e-06
MSTRG.130959.16	EIF2S1	0.955519	4.53e-06
MSTRG.130959.16	EPAS1	0.907889	0.000111823
MSTRG.131250.3	EYA4	0.952703	5.95e-06
MSTRG.131288.55	EBF1	0.914388	8.12e-05
MSTRG.131825.13	ELMOD1	0.954731	4.9e-06
MSTRG.131825.13	ENOX2	0.967646	1.1e-06
MSTRG.131932.1	DYNC1H1	0.930414	3.27e-05
MSTRG.131932.1	ELAVL1	0.91366	8.43e-05
MSTRG.132768.10	EML5	0.914436	8.1e-05
MSTRG.133113.1	EIF4E1B	0.958905	3.19e-06
MSTRG.133456.1	ERICH6B	0.914773	7.96e-05
MSTRG.133456.1	ESYT3	0.974125	4.07e-07
MSTRG.133478.20	F2	0.94845	8.71e-06
MSTRG.1337.1	EMILIN2	0.918234	6.64e-05
MSTRG.133880.4	EGLN3	0.900685	0.000155257
MSTRG.134947.4	FAM117A	0.908139	0.000110505
MSTRG.135930.17	ENO4	0.911296	9.49e-05
MSTRG.135930.17	ERICH6	0.93083	3.19e-05
MSTRG.136018.22	DUSP1	0.943133	1.34e-05
MSTRG.136018.22	EFR3B	0.903789	0.000135206
MSTRG.136018.22	ENPP1	0.921382	5.59e-05
MSTRG.136018.22	ETFDH	0.911719	9.29e-05
MSTRG.136824.1	ELP6	-0.911029	9.61e-05
MSTRG.137465.11	ERICH6B	0.979023	1.59e-07
MSTRG.137465.11	ESYT3	0.930355	3.28e-05
MSTRG.138219.3	EGLN3	0.900471	0.00015672
MSTRG.139032.1	ENPP2	-0.904801	0.000129118
MSTRG.139924.1	ECSCR	0.921422	5.58e-05
MSTRG.140078.13	EGLN3	0.931364	3.08e-05
MSTRG.140173.19	EPSTI1	0.930543	3.25e-05
MSTRG.141101.1	EXOSC10	0.953772	5.38e-06
MSTRG.143027.1	EIF4H	0.902987	0.000140185
MSTRG.143046.35	EAF2	0.901821	0.000147672
MSTRG.143046.35	EIF2S1	0.926125	4.26e-05
MSTRG.143046.35	EIF2S2	0.900692	0.000155206
MSTRG.143304.7	ERICH6B	0.925544	4.41e-05
MSTRG.144519.21	EVC2	0.902198	0.000145218
MSTRG.144940.14	EAF2	0.924263	4.75e-05
MSTRG.144940.14	EIF2B3	0.913007	8.71e-05
MSTRG.144940.14	EIF2S1	0.936052	2.26e-05
MSTRG.144940.14	EIF2S2	0.933559	2.67e-05
MSTRG.144940.14	ENO4	0.910508	9.86e-05
MSTRG.144940.14	F7	0.92941	3.49e-05
MSTRG.145840.1	ETF1	0.913981	8.29e-05
MSTRG.146389.19	EIF4E1B	0.934532	2.5e-05
MSTRG.149308.4	ERICH6B	0.929966	3.37e-05
MSTRG.149308.4	ESYT3	0.96589	1.39e-06
MSTRG.14967.3	ERGIC3	-0.907278	0.000115095
MSTRG.149862.3	DUSP22	0.900771	0.00015467
MSTRG.149862.3	EIF2S1	0.90505	0.000127654
MSTRG.149862.3	ELOVL4	0.904429	0.000131332
MSTRG.149862.3	ENO4	0.900276	0.000158056
MSTRG.149862.3	EPAS1	0.901848	0.000147498
MSTRG.149862.3	ERICH6	0.957863	3.56e-06
MSTRG.150249.1	EVC2	0.933197	2.73e-05
MSTRG.150967.22	ELP6	-0.914381	8.13e-05
MSTRG.152502.4	ERGIC3	-0.924165	4.78e-05
MSTRG.153789.3	EBF1	0.911126	9.57e-05
MSTRG.154980.1	ECSCR	0.901421	0.000150311
MSTRG.155054.5	ERP44	0.962546	2.11e-06
MSTRG.155130.1	EFHD2	0.909146	0.000105315
MSTRG.15536.1	EFCAB11	0.908226	0.00011005
MSTRG.156449.3	ELMOD1	0.921628	5.52e-05
MSTRG.157095.1	ESPN	0.920359	5.92e-05
MSTRG.157134.2	ERICH6B	0.902326	0.000144394
MSTRG.157134.2	ESYT3	0.939505	1.77e-05
MSTRG.17071.6	ERLIN1	-0.93712	2.09e-05
MSTRG.17527.15	ERLIN1	-0.94733	9.58e-06
MSTRG.17539.17	DYNAP	0.91873	6.47e-05
MSTRG.17539.17	EAF2	0.920905	5.74e-05
MSTRG.17539.17	EIF2S1	0.930895	3.17e-05
MSTRG.17539.17	ELOVL4	0.917135	7.04e-05
MSTRG.17703.16	DUSP28	0.93674	2.15e-05
MSTRG.17703.16	ELMOD1	0.98652	2.2e-08
MSTRG.17703.16	ENOX2	0.981048	1.01e-07
MSTRG.17703.7	FABP7	0.928009	3.8e-05
MSTRG.17762.7	EAF1	0.939129	1.82e-05
MSTRG.17762.7	EGR1	0.922995	5.11e-05
MSTRG.17762.7	EIF3B	0.945245	1.14e-05
MSTRG.17762.7	ENO2	0.913075	8.68e-05
MSTRG.17762.7	EOMES	0.955168	4.69e-06
MSTRG.17762.7	ESM1	0.924227	4.76e-05
MSTRG.18269.3	EGLN1	0.920662	5.82e-05
MSTRG.18676.1	DYRK3	0.90429	0.000132168
MSTRG.18676.1	FAM117B	0.913895	8.33e-05
MSTRG.19613.1	EGR1	0.911943	9.19e-05
MSTRG.19613.1	FABP7	0.913817	8.36e-05
MSTRG.24262.18	EIF4E1B	0.925501	4.42e-05
MSTRG.24262.18	ESPN	0.914077	8.25e-05
MSTRG.24502.8	ESYT3	0.936485	2.19e-05
MSTRG.24532.14	EGLN3	0.968403	9.91e-07
MSTRG.25762.10	EVPL	0.901894	0.000147193
MSTRG.25762.10	FAM102A	0.90771	0.000112776
MSTRG.26082.32	EML5	0.915565	7.65e-05
MSTRG.27215.93	EEPD1	0.902034	0.000146281
MSTRG.30251.4	ERICH6B	0.938014	1.97e-05
MSTRG.30251.4	ESYT3	0.981403	9.3e-08
MSTRG.31153.1	EMILIN2	0.924262	4.75e-05
MSTRG.3338.5	EOMES	0.915551	7.65e-05
MSTRG.3398.4	EIF1	-0.900503	0.000156499
MSTRG.3398.4	ERLIN1	-0.949256	8.12e-06
MSTRG.34142.1	ERICH6B	0.911722	9.29e-05
MSTRG.34382.3	EHHADH	-0.910656	9.79e-05
MSTRG.34396.1	ETF1	0.918124	6.68e-05
MSTRG.35016.6	EIF4E1B	0.901687	0.000148555
MSTRG.36570.4	EBAG9	0.934209	2.56e-05
MSTRG.39495.41	ESYT3	0.916828	7.16e-05
MSTRG.3987.1	ENPP2	0.920985	5.72e-05
MSTRG.40182.1	F9	0.914533	8.06e-05
MSTRG.4137.1	DVL3	0.900626	0.000155657
MSTRG.42223.1	EXT1	-0.922091	5.38e-05
MSTRG.42330.1	ELL2	0.900792	0.00015453
MSTRG.42403.1	FAM104A	0.909593	0.000103071
MSTRG.42536.22	ENOX2	0.915784	7.56e-05
MSTRG.42608.1	ESPN	0.94595	1.07e-05
MSTRG.42668.10	EVPL	0.917668	6.85e-05
MSTRG.44791.6	EYA4	0.904438	0.000131277
MSTRG.44791.6	F2	0.903619	0.00013625
MSTRG.45024.5	EGR1	0.91403	8.27e-05
MSTRG.45024.5	EMSY	0.917851	6.78e-05
MSTRG.45024.5	FAM117B	0.940616	1.63e-05
MSTRG.49619.16	DYNAP	0.908596	0.000108124
MSTRG.49762.1	EIF4H	0.911743	9.28e-05
MSTRG.5020.16	EDF1	0.904653	0.000129993
MSTRG.51365.1	EFCAB11	0.905861	0.000122966
MSTRG.51464.1	EIF4H	0.933515	2.68e-05
MSTRG.52158.1	ENKD1	0.906923	0.000117033
MSTRG.52706.57	ETFRF1	-0.91857	6.52e-05
MSTRG.52782.4	ERICH6	0.925101	4.52e-05
MSTRG.53059.2	ERLIN1	-0.935633	2.32e-05
MSTRG.54298.16	ENOPH1	0.926551	4.15e-05
MSTRG.54298.16	F2R	0.939991	1.7e-05
MSTRG.55338.4	ERP44	0.953453	5.54e-06
MSTRG.55653.2	EGLN1	0.921277	5.63e-05
MSTRG.56209.13	ECI2	0.953417	5.56e-06
MSTRG.57515.5	EEPD1	-0.916784	7.17e-05
MSTRG.58270.2	FAM117B	0.903833	0.000134939
MSTRG.58374.12	F8	0.911394	9.44e-05
MSTRG.58534.1	EFR3B	0.910914	9.67e-05
MSTRG.58534.1	ENPP1	0.940507	1.64e-05
MSTRG.59410.3	EBAG9	0.905855	0.000123002
MSTRG.60208.2	ESPN	0.917778	6.81e-05
MSTRG.62144.6	DUSP22	0.909789	0.0001021
MSTRG.62144.6	ERICH6	0.921383	5.59e-05
MSTRG.62497.6	FAM110C	0.903677	0.000135892
MSTRG.62759.1	ECH1	0.912963	8.73e-05
MSTRG.62759.1	ELMOD1	0.914562	8.05e-05
[truncated: 12,642 more rows]

## Sheet: Supplementary Table S3c
Table S3c The protein-coding genes within 100 k upstream and downstream of DE-lncRNA in N vs. T birds
LncRNA	LncRNA Location	Gene	Gene Location
MSTRG.160673.1	NW_004988091.1 : 401595 - 403414	NDUFV2	NW_004988091.1:475248-489375
MSTRG.160675.17	NW_004988091.1 : 428581 - 439571	NDUFV2	NW_004988091.1:475248-489375
MSTRG.160675.19	NW_004988091.1 : 430514 - 432596	NDUFV2	NW_004988091.1:475248-489375
MSTRG.160673.1	NW_004988091.1 : 401595 - 403414	ANKRD12	NW_004988091.1:403511-468396
MSTRG.160673.1	NW_004988091.1 : 401595 - 403414	TWSG1	NW_004988091.1:376585-398975
MSTRG.160675.17	NW_004988091.1 : 428581 - 439571	TWSG1	NW_004988091.1:376585-398975
MSTRG.160675.19	NW_004988091.1 : 430514 - 432596	TWSG1	NW_004988091.1:376585-398975
MSTRG.160673.1	NW_004988091.1 : 401595 - 403414	RALBP1	NW_004988091.1:337049-354055
MSTRG.160675.17	NW_004988091.1 : 428581 - 439571	RALBP1	NW_004988091.1:337049-354055
MSTRG.160675.19	NW_004988091.1 : 430514 - 432596	RALBP1	NW_004988091.1:337049-354055
MSTRG.156505.1	NW_004976490.1 : 1514 - 2612	LOC102085602	NW_004976490.1:7566-8376
MSTRG.156505.1	NW_004976490.1 : 1514 - 2612	LOC102085723	NW_004976490.1:4185-7665
MSTRG.156505.1	NW_004976490.1 : 1514 - 2612	LOC106146079	NW_004976490.1:15242-17664
MSTRG.156300.2	NW_004976133.1 : 8910 - 9746	LOC102097911	NW_004976133.1:10063-16342
MSTRG.156018.37	NW_004975748.1 : 5371 - 7399	LOC102093289	NW_004975748.1:7753-11610
MSTRG.156018.37	NW_004975748.1 : 5371 - 7399	PORCN	NW_004975748.1:513-4935
MSTRG.155751.29	NW_004975552.1 : 28504 - 32762	LOC102087433	NW_004975552.1:837-4613
MSTRG.155751.29	NW_004975552.1 : 28504 - 32762	LOC110356633	NW_004975552.1:20369-24987
MSTRG.155472.3	NW_004975212.1 : 29614 - 32710	LOC102095865	NW_004975212.1:31-1737
MSTRG.155472.3	NW_004975212.1 : 29614 - 32710	PPA1	NW_004975212.1:2334-11787
MSTRG.155472.3	NW_004975212.1 : 29614 - 32710	LRRC20	NW_004975212.1:17585-26338
MSTRG.155472.3	NW_004975212.1 : 29614 - 32710	LOC102096228	NW_004975212.1:11820-14652
MSTRG.155194.1	NW_004975072.1 : 189597 - 269540	RAB7B	NW_004975072.1:92954-97203
MSTRG.155239.4	NW_004975072.1 : 434103 - 458541	RAP1A	NW_004975072.1:537295-547399
MSTRG.155239.4	NW_004975072.1 : 434103 - 458541	FAM212B	NW_004975072.1:521557-524146
MSTRG.155239.4	NW_004975072.1 : 434103 - 458541	DDX20	NW_004975072.1:498601-505312
MSTRG.155194.4	NW_004975072.1 : 263195 - 269748	IKBKE	NW_004975072.1:241220-255951
MSTRG.155194.1	NW_004975072.1 : 189597 - 269540	FAM72A	NW_004975072.1:136728-141238
MSTRG.155194.1	NW_004975072.1 : 189597 - 269540	AVPR1B	NW_004975072.1:111859-117547
MSTRG.155194.1	NW_004975072.1 : 189597 - 269540	CUNH1orf186	NW_004975072.1:110780-111725
MSTRG.155194.1	NW_004975072.1 : 189597 - 269540	CTSE	NW_004975072.1:100358-102996
MSTRG.154980.1	NW_004974926.1 : 12033 - 12887	LOC102083653	NW_004974926.1:19807-22336
MSTRG.154096.1	NW_004974696.1 : 57339 - 57983	MINDY4B	NW_004974696.1:94772-102844
MSTRG.154096.1	NW_004974696.1 : 57339 - 57983	CLRN1	NW_004974696.1:85217-90785
MSTRG.154096.1	NW_004974696.1 : 57339 - 57983	GPR171	NW_004974696.1:62020-74483
MSTRG.154096.1	NW_004974696.1 : 57339 - 57983	P2RY14	NW_004974696.1:61999-68618
MSTRG.154096.1	NW_004974696.1 : 57339 - 57983	GPR87	NW_004974696.1:53006-56794
MSTRG.154096.1	NW_004974696.1 : 57339 - 57983	IGSF10	NW_004974696.1:5090-17701
MSTRG.154096.1	NW_004974696.1 : 57339 - 57983	LOC102092988	NW_004974696.1:39181-40292
MSTRG.154096.1	NW_004974696.1 : 57339 - 57983	LOC102091717	NW_004974696.1:33006-36683
MSTRG.154096.1	NW_004974696.1 : 57339 - 57983	EIF2A	NW_004974696.1:138737-147779
MSTRG.154096.1	NW_004974696.1 : 57339 - 57983	SELENOT	NW_004974696.1:130917-136457
MSTRG.154096.1	NW_004974696.1 : 57339 - 57983	LOC102093719	NW_004974696.1:127951-129287
MSTRG.154096.1	NW_004974696.1 : 57339 - 57983	ERICH6	NW_004974696.1:120424-127518
MSTRG.154096.1	NW_004974696.1 : 57339 - 57983	SIAH2	NW_004974696.1:104914-117288
MSTRG.153724.1	NW_004974625.1 : 2119 - 5406	LOC110356480	NW_004974625.1:71-874
MSTRG.153686.42	NW_004974613.1 : 183179 - 185847	RACGAP1	NW_004974613.1:96149-104822
MSTRG.153686.42	NW_004974613.1 : 183179 - 185847	SLC48A1	NW_004974613.1:251192-255961
MSTRG.153686.42	NW_004974613.1 : 183179 - 185847	LOC102090149	NW_004974613.1:226044-235718
MSTRG.153522.2	NW_004974585.1 : 26074 - 30942	TMEM158	NW_004974585.1:31465-32349
MSTRG.153424.14	NW_004974554.1 : 4599 - 6824	BCKDK	NW_004974554.1:5-1593
MSTRG.153424.17	NW_004974554.1 : 4599 - 6805	BCKDK	NW_004974554.1:5-1593
MSTRG.153229.4	NW_004974521.1 : 469819 - 506646	LRTM1	NW_004974521.1:603784-606318
MSTRG.153141.1	NW_004974518.1 : 93707 - 105407	LOC102087376	NW_004974518.1:9724-10490
MSTRG.153141.1	NW_004974518.1 : 93707 - 105407	SARNP	NW_004974518.1:77619-92598
MSTRG.153141.1	NW_004974518.1 : 93707 - 105407	GDF11	NW_004974518.1:70204-74956
MSTRG.153141.1	NW_004974518.1 : 93707 - 105407	INPP1	NW_004974518.1:64070-65946
MSTRG.153141.1	NW_004974518.1 : 93707 - 105407	CD63	NW_004974518.1:61157-64377
MSTRG.153141.1	NW_004974518.1 : 93707 - 105407	RDH5	NW_004974518.1:59687-60808
MSTRG.153141.1	NW_004974518.1 : 93707 - 105407	ITGA7	NW_004974518.1:34893-52397
MSTRG.153141.1	NW_004974518.1 : 93707 - 105407	LOC102087914	NW_004974518.1:25679-33813
MSTRG.153141.1	NW_004974518.1 : 93707 - 105407	C1QL4	NW_004974518.1:11094-12495
MSTRG.153048.89	NW_004974511.1 : 441422 - 443563	ARRDC1	NW_004974511.1:501165-528453
MSTRG.151580.1	NW_004974476.1 : 104811 - 123613	TMX4	NW_004974476.1:176671-210415
MSTRG.151580.1	NW_004974476.1 : 104811 - 123613	HAO1	NW_004974476.1:147055-172892
MSTRG.150897.10	NW_004974386.1 : 13689 - 14754	LOC102092078	NW_004974386.1:5-10863
MSTRG.150897.19	NW_004974386.1 : 13689 - 14749	LOC102092078	NW_004974386.1:5-10863
MSTRG.150879.1	NW_004974382.1 : 319003 - 319994	ALDH18A1	NW_004974382.1:375995-403888
MSTRG.150880.1	NW_004974382.1 : 346873 - 348422	ALDH18A1	NW_004974382.1:375995-403888
MSTRG.150879.1	NW_004974382.1 : 319003 - 319994	TCTN3	NW_004974382.1:352342-367019
MSTRG.150880.1	NW_004974382.1 : 346873 - 348422	TCTN3	NW_004974382.1:352342-367019
MSTRG.150879.1	NW_004974382.1 : 319003 - 319994	LOC102091166	NW_004974382.1:253073-274757
MSTRG.150880.1	NW_004974382.1 : 346873 - 348422	LOC102091166	NW_004974382.1:253073-274757
MSTRG.150879.1	NW_004974382.1 : 319003 - 319994	NKX6-2	NW_004974382.1:238384-240845
MSTRG.150645.41	NW_004974361.1 : 26253 - 40586	FRS2	NW_004974361.1:91318-132866
MSTRG.150645.41	NW_004974361.1 : 26253 - 40586	YEATS4	NW_004974361.1:43344-56726
MSTRG.150626.3	NW_004974350.1 : 65540 - 66973	GPCPD1	NW_004974350.1:76366-110404
MSTRG.150626.3	NW_004974350.1 : 65540 - 66973	LOC102085537	NW_004974350.1:7-59246
MSTRG.150434.4	NW_004974321.1 : 156858 - 159463	LOC110356167	NW_004974321.1:67037-68695
MSTRG.149750.2	NW_004974242.1 : 71522 - 74491	DAGLB	NW_004974242.1:89208-99775
MSTRG.149750.2	NW_004974242.1 : 71522 - 74491	KDELR2	NW_004974242.1:81247-87409
MSTRG.149750.2	NW_004974242.1 : 71522 - 74491	METTL9	NW_004974242.1:6831-27799
MSTRG.149750.2	NW_004974242.1 : 71522 - 74491	IGSF6	NW_004974242.1:19551-26322
MSTRG.149750.2	NW_004974242.1 : 71522 - 74491	LOC110356122	NW_004974242.1:124595-131868
MSTRG.149750.2	NW_004974242.1 : 71522 - 74491	RAC1	NW_004974242.1:100900-108889
MSTRG.149308.4	NW_004974228.1 : 237172 - 238403	LOC102086631	NW_004974228.1:239486-243408
MSTRG.149308.4	NW_004974228.1 : 237172 - 238403	M1AP	NW_004974228.1:205067-227120
MSTRG.149308.4	NW_004974228.1 : 237172 - 238403	DOK1	NW_004974228.1:197882-201870
MSTRG.149308.4	NW_004974228.1 : 237172 - 238403	LOC102086261	NW_004974228.1:166363-185096
MSTRG.149308.4	NW_004974228.1 : 237172 - 238403	LOXL3	NW_004974228.1:147862-158792
MSTRG.149308.4	NW_004974228.1 : 237172 - 238403	HTRA2	NW_004974228.1:141267-145551
MSTRG.148973.1	NW_004974201.1 : 13228 - 22257	LOC102088228	NW_004974201.1:44770-45668
MSTRG.148975.2	NW_004974201.1 : 20530 - 22811	LOC102088228	NW_004974201.1:44770-45668
MSTRG.148975.4	NW_004974201.1 : 20673 - 22794	LOC102088228	NW_004974201.1:44770-45668
MSTRG.148975.48	NW_004974201.1 : 33562 - 33909	LOC102088228	NW_004974201.1:44770-45668
MSTRG.148973.1	NW_004974201.1 : 13228 - 22257	LOC102087492	NW_004974201.1:4189-11679
MSTRG.148975.2	NW_004974201.1 : 20530 - 22811	LOC102087492	NW_004974201.1:4189-11679
MSTRG.148975.4	NW_004974201.1 : 20673 - 22794	LOC102087492	NW_004974201.1:4189-11679
MSTRG.148975.48	NW_004974201.1 : 33562 - 33909	LOC102087492	NW_004974201.1:4189-11679
MSTRG.148973.1	NW_004974201.1 : 13228 - 22257	LOC102088036	NW_004974201.1:25766-42079
MSTRG.148975.2	NW_004974201.1 : 20530 - 22811	LOC102088036	NW_004974201.1:25766-42079
MSTRG.148975.4	NW_004974201.1 : 20673 - 22794	LOC102088036	NW_004974201.1:25766-42079
MSTRG.148961.1	NW_004974199.1 : 1 - 3544	LOC110356052	NW_004974199.1:7654-16936
MSTRG.148961.2	NW_004974199.1 : 1 - 3481	LOC110356052	NW_004974199.1:7654-16936
MSTRG.148961.8	NW_004974199.1 : 1 - 3471	LOC110356052	NW_004974199.1:7654-16936
MSTRG.148883.1	NW_004974183.1 : 96396 - 98086	LOC110356036	NW_004974183.1:13236-91127
MSTRG.148784.5	NW_004974179.1 : 149964 - 165529	LOC102098146	NW_004974179.1:83406-101529
MSTRG.148598.2	NW_004974169.1 : 299064 - 300300	COPZ1	NW_004974169.1:323526-325326
MSTRG.148598.2	NW_004974169.1 : 299064 - 300300	HNRNPA1	NW_004974169.1:309616-312058
MSTRG.148598.2	NW_004974169.1 : 299064 - 300300	CBX5	NW_004974169.1:302606-304636
MSTRG.148598.2	NW_004974169.1 : 299064 - 300300	HOXC4	NW_004974169.1:256772-258596
MSTRG.148598.2	NW_004974169.1 : 299064 - 300300	HOXC5	NW_004974169.1:239638-241767
MSTRG.148153.1	NW_004974150.1 : 114715 - 117259	LOC102090441	NW_004974150.1:60531-79696
MSTRG.148153.1	NW_004974150.1 : 114715 - 117259	LOC102089341	NW_004974150.1:185917-191413
MSTRG.148153.1	NW_004974150.1 : 114715 - 117259	SH3BGRL	NW_004974150.1:173889-183208
MSTRG.147897.2	NW_004974137.1 : 8368 - 9311	CYHR1	NW_004974137.1:9494-12541
MSTRG.147846.1	NW_004974133.1 : 144202 - 151339	SCX	NW_004974133.1:79725-90780
MSTRG.147846.1	NW_004974133.1 : 144202 - 151339	BOP1	NW_004974133.1:64393-126064
MSTRG.147082.1	NW_004974103.1 : 89430 - 94003	PTRH1	NW_004974103.1:9261-10988
MSTRG.147082.1	NW_004974103.1 : 89430 - 94003	DPM2	NW_004974103.1:82774-88730
MSTRG.147082.1	NW_004974103.1 : 89430 - 94003	ST6GALNAC4	NW_004974103.1:79001-82734
MSTRG.147082.1	NW_004974103.1 : 89430 - 94003	ST6GALNAC6	NW_004974103.1:75035-77234
MSTRG.147082.1	NW_004974103.1 : 89430 - 94003	AK1	NW_004974103.1:68149-71462
MSTRG.147082.1	NW_004974103.1 : 89430 - 94003	ENG	NW_004974103.1:54380-61281
MSTRG.147082.1	NW_004974103.1 : 89430 - 94003	FPGS	NW_004974103.1:50132-53477
MSTRG.147082.1	NW_004974103.1 : 89430 - 94003	CDK9	NW_004974103.1:42074-49054
MSTRG.147082.1	NW_004974103.1 : 89430 - 94003	CERCAM	NW_004974103.1:3241-7615
MSTRG.147082.1	NW_004974103.1 : 89430 - 94003	SH2D3C	NW_004974103.1:17415-41107
MSTRG.147082.1	NW_004974103.1 : 89430 - 94003	LOC102089278	NW_004974103.1:167935-170310
MSTRG.147082.1	NW_004974103.1 : 89430 - 94003	LOC102088957	NW_004974103.1:161932-166961
MSTRG.147082.1	NW_004974103.1 : 89430 - 94003	SLC25A25	NW_004974103.1:144233-159239
MSTRG.147082.1	NW_004974103.1 : 89430 - 94003	NAIF1	NW_004974103.1:129330-133019
MSTRG.147082.1	NW_004974103.1 : 89430 - 94003	TOR2A	NW_004974103.1:12610-16787
MSTRG.146439.23	NW_004974098.1 : 54215 - 92431	GPT	NW_004974098.1:160506-174706
MSTRG.146468.1	NW_004974098.1 : 180810 - 181444	GPT	NW_004974098.1:160506-174706
MSTRG.146439.23	NW_004974098.1 : 54215 - 92431	RECQL4	NW_004974098.1:138262-153624
MSTRG.146439.7	NW_004974098.1 : 9527 - 61311	RECQL4	NW_004974098.1:138262-153624
MSTRG.146468.1	NW_004974098.1 : 180810 - 181444	RECQL4	NW_004974098.1:138262-153624
MSTRG.146439.23	NW_004974098.1 : 54215 - 92431	LRRC14	NW_004974098.1:133923-135869
MSTRG.146439.7	NW_004974098.1 : 9527 - 61311	LRRC14	NW_004974098.1:133923-135869
MSTRG.146439.9	NW_004974098.1 : 14417 - 41392	LRRC14	NW_004974098.1:133923-135869
MSTRG.146468.1	NW_004974098.1 : 180810 - 181444	LRRC14	NW_004974098.1:133923-135869
MSTRG.146439.23	NW_004974098.1 : 54215 - 92431	CUNH8orf82	NW_004974098.1:123880-133623
MSTRG.146439.7	NW_004974098.1 : 9527 - 61311	CUNH8orf82	NW_004974098.1:123880-133623
MSTRG.146439.9	NW_004974098.1 : 14417 - 41392	CUNH8orf82	NW_004974098.1:123880-133623
MSTRG.146468.1	NW_004974098.1 : 180810 - 181444	CUNH8orf82	NW_004974098.1:123880-133623
MSTRG.146439.23	NW_004974098.1 : 54215 - 92431	LOC110355864	NW_004974098.1:121670-122992
MSTRG.146439.7	NW_004974098.1 : 9527 - 61311	LOC110355864	NW_004974098.1:121670-122992
MSTRG.146439.9	NW_004974098.1 : 14417 - 41392	LOC110355864	NW_004974098.1:121670-122992
MSTRG.146468.1	NW_004974098.1 : 180810 - 181444	LOC110355864	NW_004974098.1:121670-122992
MSTRG.145840.1	NW_004974095.1 : 1080078 - 1088723	PGD	NW_004974095.1:1163181-1172111
MSTRG.145840.1	NW_004974095.1 : 1080078 - 1088723	LOC102094563	NW_004974095.1:1160780-1163293
MSTRG.145840.1	NW_004974095.1 : 1080078 - 1088723	DFFA	NW_004974095.1:1157286-1160305
MSTRG.145840.1	NW_004974095.1 : 1080078 - 1088723	PEX14	NW_004974095.1:1088827-1155440
MSTRG.145459.1	NW_004974093.1 : 131963 - 134600	AGPS	NW_004974093.1:33862-82786
MSTRG.145459.1	NW_004974093.1 : 131963 - 134600	HNRNPA3	NW_004974093.1:140632-158621
MSTRG.145459.1	NW_004974093.1 : 131963 - 134600	LOC110355771	NW_004974093.1:103852-109387
MSTRG.144940.13	NW_004974073.1 : 36575 - 53975	LOC102087248	NW_004974073.1:2213-7210
MSTRG.144940.13	NW_004974073.1 : 36575 - 53975	LOC102087069	NW_004974073.1:12-2255
MSTRG.144615.2	NW_004974045.1 : 104853 - 110501	RBM17	NW_004974045.1:58888-71140
MSTRG.144615.2	NW_004974045.1 : 104853 - 110501	LOC102090507	NW_004974045.1:17366-33412
MSTRG.144591.1	NW_004974044.1 : 920761 - 921481	LYSMD4	NW_004974044.1:855041-877489
MSTRG.144519.21	NW_004974044.1 : 367726 - 376632	PGPEP1L	NW_004974044.1:386491-401827
MSTRG.144004.1	NW_004974031.1 : 185246 - 187340	HELB	NW_004974031.1:107794-122233
MSTRG.143818.3	NW_004974022.1 : 782205 - 790269	MPPE1	NW_004974022.1:800220-813673
MSTRG.143818.7	NW_004974022.1 : 782205 - 790266	MPPE1	NW_004974022.1:800220-813673
MSTRG.143818.3	NW_004974022.1 : 782205 - 790269	LOC110355623	NW_004974022.1:791268-804926
MSTRG.143818.7	NW_004974022.1 : 782205 - 790266	LOC110355623	NW_004974022.1:791268-804926
MSTRG.143818.3	NW_004974022.1 : 782205 - 790269	CIDEA	NW_004974022.1:726397-736982
MSTRG.143818.7	NW_004974022.1 : 782205 - 790266	CIDEA	NW_004974022.1:726397-736982
MSTRG.143818.3	NW_004974022.1 : 782205 - 790269	TUBB6	NW_004974022.1:704613-712450
MSTRG.143818.7	NW_004974022.1 : 782205 - 790266	TUBB6	NW_004974022.1:704613-712450
MSTRG.143749.25	NW_004974022.1 : 48490 - 61789	FAM210A	NW_004974022.1:6544-12366
MSTRG.143673.21	NW_004974018.1 : 184922 - 193201	TCAIM	NW_004974018.1:245477-265145
MSTRG.143673.21	NW_004974018.1 : 184922 - 193201	TRIM71	NW_004974018.1:137960-155725
MSTRG.143339.1	NW_004974009.1 : 18024 - 19936	CIZ1	NW_004974009.1:96497-119826
MSTRG.143526.1	NW_004974009.1 : 1040013 - 1040472	FUBP3	NW_004974009.1:955862-987645
MSTRG.143339.1	NW_004974009.1 : 18024 - 19936	SWI5	NW_004974009.1:5523-10122
MSTRG.143339.1	NW_004974009.1 : 18024 - 19936	DNM1	NW_004974009.1:30172-78197
MSTRG.143339.1	NW_004974009.1 : 18024 - 19936	TRUB2	NW_004974009.1:18-4184
MSTRG.143526.1	NW_004974009.1 : 1040013 - 1040472	LOC106145991	NW_004974009.1:1069084-1074602
MSTRG.143526.1	NW_004974009.1 : 1040013 - 1040472	EXOSC2	NW_004974009.1:1007241-1011728
MSTRG.143325.1	NW_004974006.1 : 10168 - 11670	LOC102094750	NW_004974006.1:9013-10011
MSTRG.143325.1	NW_004974006.1 : 10168 - 11670	LOC110355576	NW_004974006.1:704-2517
MSTRG.143230.1	NW_004974004.1 : 49396 - 50187	LOC102092502	NW_004974004.1:713-21828
MSTRG.143230.1	NW_004974004.1 : 49396 - 50187	LOC102092869	NW_004974004.1:33429-46558
MSTRG.143230.1	NW_004974004.1 : 49396 - 50187	LOC102092684	NW_004974004.1:26809-34178
MSTRG.143079.3	NW_004973997.1 : 541991 - 544325	CEMIP	NW_004973997.1:614102-638950
MSTRG.143046.33	NW_004973997.1 : 504033 - 510380	MESD	NW_004973997.1:596577-610108
MSTRG.143079.3	NW_004973997.1 : 541991 - 544325	MESD	NW_004973997.1:596577-610108
MSTRG.143046.33	NW_004973997.1 : 504033 - 510380	TLNRD1	NW_004973997.1:591556-593543
MSTRG.143046.35	NW_004973997.1 : 505630 - 508527	TLNRD1	NW_004973997.1:591556-593543
MSTRG.143079.3	NW_004973997.1 : 541991 - 544325	TLNRD1	NW_004973997.1:591556-593543
MSTRG.143046.33	NW_004973997.1 : 504033 - 510380	CFAP161	NW_004973997.1:522161-527122
MSTRG.143046.35	NW_004973997.1 : 505630 - 508527	CFAP161	NW_004973997.1:522161-527122
MSTRG.143079.3	NW_004973997.1 : 541991 - 544325	CFAP161	NW_004973997.1:522161-527122
MSTRG.143046.33	NW_004973997.1 : 504033 - 510380	IL16	NW_004973997.1:465700-496119
MSTRG.143046.35	NW_004973997.1 : 505630 - 508527	IL16	NW_004973997.1:465700-496119
MSTRG.143079.3	NW_004973997.1 : 541991 - 544325	IL16	NW_004973997.1:465700-496119
MSTRG.143046.33	NW_004973997.1 : 504033 - 510380	STARD5	NW_004973997.1:457967-463389
MSTRG.143046.35	NW_004973997.1 : 505630 - 508527	STARD5	NW_004973997.1:457967-463389
MSTRG.143079.3	NW_004973997.1 : 541991 - 544325	STARD5	NW_004973997.1:457967-463389
MSTRG.143046.33	NW_004973997.1 : 504033 - 510380	TMC3	NW_004973997.1:432625-458407
MSTRG.143046.35	NW_004973997.1 : 505630 - 508527	TMC3	NW_004973997.1:432625-458407
MSTRG.142810.12	NW_004973985.1 : 319470 - 345611	SSBP1	NW_004973985.1:298376-310960
MSTRG.142810.13	NW_004973985.1 : 319470 - 345611	SSBP1	NW_004973985.1:298376-310960
MSTRG.142810.42	NW_004973985.1 : 328771 - 345611	SSBP1	NW_004973985.1:298376-310960
MSTRG.142810.12	NW_004973985.1 : 319470 - 345611	WEE2	NW_004973985.1:292023-305619
MSTRG.142810.13	NW_004973985.1 : 319470 - 345611	WEE2	NW_004973985.1:292023-305619
MSTRG.142810.42	NW_004973985.1 : 328771 - 345611	WEE2	NW_004973985.1:292023-305619
MSTRG.142810.12	NW_004973985.1 : 319470 - 345611	KIAA1147	NW_004973985.1:275783-284441
MSTRG.142810.13	NW_004973985.1 : 319470 - 345611	KIAA1147	NW_004973985.1:275783-284441
MSTRG.142810.42	NW_004973985.1 : 328771 - 345611	KIAA1147	NW_004973985.1:275783-284441
MSTRG.142810.12	NW_004973985.1 : 319470 - 345611	AGK	NW_004973985.1:231077-269687
MSTRG.142810.13	NW_004973985.1 : 319470 - 345611	AGK	NW_004973985.1:231077-269687
MSTRG.142810.42	NW_004973985.1 : 328771 - 345611	AGK	NW_004973985.1:231077-269687
MSTRG.142573.14	NW_004973971.1 : 70037 - 83625	ABI1	NW_004973971.1:83814-167107
MSTRG.142573.14	NW_004973971.1 : 70037 - 83625	MASTL	NW_004973971.1:6964-26703
MSTRG.142571.2	NW_004973971.1 : 24475 - 28498	ACBD5	NW_004973971.1:29637-60941
MSTRG.142573.14	NW_004973971.1 : 70037 - 83625	ACBD5	NW_004973971.1:29637-60941
MSTRG.142352.1	NW_004973960.1 : 158772 - 200596	LOC102090555	NW_004973960.1:81177-119484
MSTRG.142352.1	NW_004973960.1 : 158772 - 200596	NFU1	NW_004973960.1:262992-267860
MSTRG.142352.1	NW_004973960.1 : 158772 - 200596	LOC102092751	NW_004973960.1:246180-249942
MSTRG.142352.1	NW_004973960.1 : 158772 - 200596	ANXA4	NW_004973960.1:141881-153902
MSTRG.142352.1	NW_004973960.1 : 158772 - 200596	GMCL1	NW_004973960.1:120008-141574
MSTRG.142137.2	NW_004973953.1 : 495492 - 496785	LOC102086138	NW_004973953.1:559691-563047
MSTRG.142137.2	NW_004973953.1 : 495492 - 496785	IP6K3	NW_004973953.1:551372-563478
MSTRG.142137.2	NW_004973953.1 : 495492 - 496785	LEMD2	NW_004973953.1:533459-543915
MSTRG.142137.2	NW_004973953.1 : 495492 - 496785	MLN	NW_004973953.1:524073-529146
MSTRG.142137.2	NW_004973953.1 : 495492 - 496785	GRM4	NW_004973953.1:419002-448188
MSTRG.141700.33	NW_004973947.1 : 310648 - 334214	LOC102090081	NW_004973947.1:244692-251185
MSTRG.141575.3	NW_004973939.1 : 1067005 - 1074023	CAVIN1	NW_004973939.1:979830-994147
MSTRG.141356.1	NW_004973939.1 : 486911 - 488185	CCDC47	NW_004973939.1:572181-581783
MSTRG.141356.1	NW_004973939.1 : 486911 - 488185	STRADA	NW_004973939.1:561270-570573
MSTRG.141356.1	NW_004973939.1 : 486911 - 488185	LOC102094012	NW_004973939.1:556170-568241
MSTRG.141356.1	NW_004973939.1 : 486911 - 488185	LIMD2	NW_004973939.1:541593-547062
MSTRG.141356.1	NW_004973939.1 : 486911 - 488185	MAP3K3	NW_004973939.1:511531-536965
MSTRG.141356.1	NW_004973939.1 : 486911 - 488185	KCNH6	NW_004973939.1:453398-484316
MSTRG.141356.1	NW_004973939.1 : 486911 - 488185	ACE	NW_004973939.1:429576-446572
MSTRG.141356.1	NW_004973939.1 : 486911 - 488185	LOC102093825	NW_004973939.1:418681-420788
MSTRG.141575.3	NW_004973939.1 : 1067005 - 1074023	LOC110355445	NW_004973939.1:1121053-1152068
MSTRG.141575.3	NW_004973939.1 : 1067005 - 1074023	DHX58	NW_004973939.1:1092087-1096058
MSTRG.141575.3	NW_004973939.1 : 1067005 - 1074023	KAT2A	NW_004973939.1:1084530-1090258
MSTRG.141575.3	NW_004973939.1 : 1067005 - 1074023	LOC102090924	NW_004973939.1:1082512-1083475
MSTRG.141575.3	NW_004973939.1 : 1067005 - 1074023	LOC102090744	NW_004973939.1:1080898-1081731
MSTRG.141575.3	NW_004973939.1 : 1067005 - 1074023	RAB5C	NW_004973939.1:1074213-1078597
MSTRG.141575.3	NW_004973939.1 : 1067005 - 1074023	KCNH4	NW_004973939.1:1056463-1063662
MSTRG.141575.3	NW_004973939.1 : 1067005 - 1074023	HCRT	NW_004973939.1:1052642-1053753
MSTRG.141575.3	NW_004973939.1 : 1067005 - 1074023	LOC102098985	NW_004973939.1:1046489-1052545
MSTRG.141575.3	NW_004973939.1 : 1067005 - 1074023	GHDC	NW_004973939.1:1035901-1040292
MSTRG.141575.3	NW_004973939.1 : 1067005 - 1074023	LOC102098622	NW_004973939.1:1029746-1035786
MSTRG.141575.3	NW_004973939.1 : 1067005 - 1074023	STAT3	NW_004973939.1:1001055-1010599
MSTRG.140975.27	NW_004973924.1 : 19985 - 75886	LOC106145973	NW_004973924.1:16495-19924
MSTRG.140799.3	NW_004973922.1 : 649656 - 655448	SNX10	NW_004973922.1:670869-701711
MSTRG.140799.3	NW_004973922.1 : 649656 - 655448	CBX3	NW_004973922.1:631081-643963
MSTRG.140799.3	NW_004973922.1 : 649656 - 655448	HNRNPA2B1	NW_004973922.1:611869-628999
MSTRG.140799.3	NW_004973922.1 : 649656 - 655448	NFE2L3	NW_004973922.1:607052-608339
MSTRG.140649.1	NW_004973922.1 : 99657 - 100306	OSBPL3	NW_004973922.1:3432-84800
MSTRG.140649.1	NW_004973922.1 : 99657 - 100306	NPVF	NW_004973922.1:173583-177223
MSTRG.140649.1	NW_004973922.1 : 99657 - 100306	LOC102085712	NW_004973922.1:124319-125562
MSTRG.139909.1	NW_004973900.1 : 7130 - 11387	LOC102098022	NW_004973900.1:35708-87495
MSTRG.139916.5	NW_004973900.1 : 31979 - 33033	LOC102098022	NW_004973900.1:35708-87495
MSTRG.139568.3	NW_004973894.1 : 130153 - 142107	LOC102088712	NW_004973894.1:197723-201824
MSTRG.139568.3	NW_004973894.1 : 130153 - 142107	TRAF5	NW_004973894.1:175994-196179
MSTRG.139568.3	NW_004973894.1 : 130153 - 142107	RCOR3	NW_004973894.1:149446-170523
MSTRG.139437.31	NW_004973893.1 : 89086 - 99732	NSUN2	NW_004973893.1:154087-173036
MSTRG.139437.31	NW_004973893.1 : 89086 - 99732	SRD5A1	NW_004973893.1:137235-151027
MSTRG.138599.18	NW_004973886.1 : 785194 - 788941	CLDN1	NW_004973886.1:847624-859455
MSTRG.138599.18	NW_004973886.1 : 785194 - 788941	CLDN16	NW_004973886.1:826193-833378
MSTRG.138599.18	NW_004973886.1 : 785194 - 788941	TMEM207	NW_004973886.1:807448-820325
MSTRG.138599.18	NW_004973886.1 : 785194 - 788941	GMNC	NW_004973886.1:689420-695805
MSTRG.138138.2	NW_004973884.1 : 387793 - 396799	RTN4	NW_004973884.1:422688-449394
MSTRG.138138.2	NW_004973884.1 : 387793 - 396799	RPS27A	NW_004973884.1:362242-363891
MSTRG.138138.2	NW_004973884.1 : 387793 - 396799	MTIF2	NW_004973884.1:351701-361713
MSTRG.138138.2	NW_004973884.1 : 387793 - 396799	LOC102090249	NW_004973884.1:349875-351252
MSTRG.137803.10	NW_004973875.1 : 203912 - 205169	XCR1	NW_004973875.1:182759-186096
MSTRG.137803.10	NW_004973875.1 : 203912 - 205169	LOC102094010	NW_004973875.1:144486-150388
MSTRG.137144.4	NW_004973861.1 : 232161 - 235161	SEMA7A	NW_004973861.1:303617-331465
MSTRG.137144.4	NW_004973861.1 : 232161 - 235161	LOC102096337	NW_004973861.1:294309-299148
MSTRG.137144.4	NW_004973861.1 : 232161 - 235161	CCDC33	NW_004973861.1:259947-294323
MSTRG.137144.4	NW_004973861.1 : 232161 - 235161	STRA6	NW_004973861.1:241302-257556
MSTRG.137144.4	NW_004973861.1 : 232161 - 235161	ISLR	NW_004973861.1:236396-239197
MSTRG.137144.4	NW_004973861.1 : 232161 - 235161	ISLR2	NW_004973861.1:228791-231162
MSTRG.137144.4	NW_004973861.1 : 232161 - 235161	LOC102095797	NW_004973861.1:217969-222773
MSTRG.137144.4	NW_004973861.1 : 232161 - 235161	LOC110355096	NW_004973861.1:216423-217953
MSTRG.137144.4	NW_004973861.1 : 232161 - 235161	STOML1	NW_004973861.1:209697-214779
MSTRG.137144.4	NW_004973861.1 : 232161 - 235161	LOC102095362	NW_004973861.1:204707-208371
MSTRG.137144.4	NW_004973861.1 : 232161 - 235161	LOC102095173	NW_004973861.1:187828-190907
MSTRG.137144.4	NW_004973861.1 : 232161 - 235161	LOXL1	NW_004973861.1:179004-186424
MSTRG.136741.2	NW_004973855.1 : 154840 - 157474	RALGPS1	NW_004973855.1:96487-153293
MSTRG.136741.2	NW_004973855.1 : 154840 - 157474	LOC102098738	NW_004973855.1:81519-96457
MSTRG.136741.2	NW_004973855.1 : 154840 - 157474	LOC102098559	NW_004973855.1:72153-80913
MSTRG.136741.2	NW_004973855.1 : 154840 - 157474	FBXW2	NW_004973855.1:61066-69486
MSTRG.136806.1	NW_004973855.1 : 647827 - 648935	PBX3	NW_004973855.1:598888-618540
MSTRG.136741.2	NW_004973855.1 : 154840 - 157474	LOC102084005	NW_004973855.1:193700-249352
MSTRG.136741.2	NW_004973855.1 : 154840 - 157474	ZBTB43	NW_004973855.1:172644-177982
MSTRG.136741.2	NW_004973855.1 : 154840 - 157474	ZBTB34	NW_004973855.1:161654-168447
MSTRG.136741.2	NW_004973855.1 : 154840 - 157474	ANGPTL2	NW_004973855.1:127279-135365
MSTRG.136235.19	NW_004973847.1 : 2780234 - 2790031	STOM	NW_004973847.1:2723286-2731835
MSTRG.136235.19	NW_004973847.1 : 2780234 - 2790031	GSN	NW_004973847.1:2700491-2723027
MSTRG.136168.1	NW_004973847.1 : 2593656 - 2595215	RAB14	NW_004973847.1:2679153-2689403
MSTRG.136168.1	NW_004973847.1 : 2593656 - 2595215	CNTRL	NW_004973847.1:2649391-2676185
MSTRG.136168.1	NW_004973847.1 : 2593656 - 2595215	C5	NW_004973847.1:2624507-2648251
MSTRG.136168.1	NW_004973847.1 : 2593656 - 2595215	TRAF1	NW_004973847.1:2605355-2619335
MSTRG.136168.1	NW_004973847.1 : 2593656 - 2595215	PHF19	NW_004973847.1:2595536-2600680
MSTRG.136168.1	NW_004973847.1 : 2593656 - 2595215	CUTA	NW_004973847.1:2586258-2593564
MSTRG.136168.1	NW_004973847.1 : 2593656 - 2595215	PSMD5	NW_004973847.1:2579291-2585595
MSTRG.136168.1	NW_004973847.1 : 2593656 - 2595215	LOC102092070	NW_004973847.1:2574476-2577900
MSTRG.136168.1	NW_004973847.1 : 2593656 - 2595215	KCNT1	NW_004973847.1:2504481-2533419
MSTRG.136018.22	NW_004973847.1 : 1966049 - 1972071	EGFL7	NW_004973847.1:1955264-1962951
MSTRG.136018.25	NW_004973847.1 : 1966049 - 1972071	EGFL7	NW_004973847.1:1955264-1962951
MSTRG.136018.22	NW_004973847.1 : 1966049 - 1972071	AGPAT2	NW_004973847.1:1944862-1954147
MSTRG.136018.25	NW_004973847.1 : 1966049 - 1972071	AGPAT2	NW_004973847.1:1944862-1954147
MSTRG.136018.22	NW_004973847.1 : 1966049 - 1972071	FAM69B	NW_004973847.1:1928935-1932558
MSTRG.136018.25	NW_004973847.1 : 1966049 - 1972071	FAM69B	NW_004973847.1:1928935-1932558
MSTRG.136018.22	NW_004973847.1 : 1966049 - 1972071	MRPS2	NW_004973847.1:1920973-1922379
MSTRG.136018.25	NW_004973847.1 : 1966049 - 1972071	MRPS2	NW_004973847.1:1920973-1922379
MSTRG.136018.22	NW_004973847.1 : 1966049 - 1972071	PPP1R26	NW_004973847.1:1910807-1919500
MSTRG.136018.25	NW_004973847.1 : 1966049 - 1972071	PPP1R26	NW_004973847.1:1910807-1919500
MSTRG.135998.1	NW_004973847.1 : 1809855 - 1814161	OLFM1	NW_004973847.1:1778828-1809453
MSTRG.135945.1	NW_004973847.1 : 1346984 - 1369996	WDR5	NW_004973847.1:1309743-1318854
MSTRG.135945.1	NW_004973847.1 : 1346984 - 1369996	BRD3	NW_004973847.1:1269431-1306093
MSTRG.135484.1	NW_004973837.1 : 35222 - 39368	NT5C1A	NW_004973837.1:94107-103868
MSTRG.135484.1	NW_004973837.1 : 35222 - 39368	HPCAL4	NW_004973837.1:88644-92304
MSTRG.135484.1	NW_004973837.1 : 35222 - 39368	LOC102086253	NW_004973837.1:79682-87888
MSTRG.135484.1	NW_004973837.1 : 35222 - 39368	TRIT1	NW_004973837.1:62644-76084
MSTRG.135484.1	NW_004973837.1 : 35222 - 39368	MYCL	NW_004973837.1:53882-57677
MSTRG.135484.1	NW_004973837.1 : 35222 - 39368	MFSD2A	NW_004973837.1:39550-47814
MSTRG.135484.1	NW_004973837.1 : 35222 - 39368	LOC102085529	NW_004973837.1:2622-10029
MSTRG.135484.1	NW_004973837.1 : 35222 - 39368	CAP1	NW_004973837.1:22297-28924
MSTRG.135484.1	NW_004973837.1 : 35222 - 39368	PPT1	NW_004973837.1:16774-21313
MSTRG.135484.1	NW_004973837.1 : 35222 - 39368	RPL11	NW_004973837.1:14417-15938
MSTRG.135484.1	NW_004973837.1 : 35222 - 39368	HEYL	NW_004973837.1:116879-125238
MSTRG.135355.3	NW_004973834.1 : 125434 - 128914	CDC42SE1	NW_004973834.1:99974-107226
MSTRG.135355.3	NW_004973834.1 : 125434 - 128914	PRUNE1	NW_004973834.1:95108-98294
MSTRG.135355.3	NW_004973834.1 : 125434 - 128914	MINDY1	NW_004973834.1:91354-92962
MSTRG.135355.3	NW_004973834.1 : 125434 - 128914	SETDB1	NW_004973834.1:70265-83552
MSTRG.135355.3	NW_004973834.1 : 125434 - 128914	ARNT	NW_004973834.1:50985-64301
MSTRG.135355.3	NW_004973834.1 : 125434 - 128914	CTSK	NW_004973834.1:46953-48936
MSTRG.135355.3	NW_004973834.1 : 125434 - 128914	CTSS	NW_004973834.1:38510-44484
MSTRG.135355.3	NW_004973834.1 : 125434 - 128914	LOC102097673	NW_004973834.1:224270-224680
MSTRG.135355.3	NW_004973834.1 : 125434 - 128914	LOC102095423	NW_004973834.1:221398-222097
MSTRG.135355.3	NW_004973834.1 : 125434 - 128914	LOC102095233	NW_004973834.1:218990-219381
MSTRG.135355.3	NW_004973834.1 : 125434 - 128914	LOC102095054	NW_004973834.1:216663-217375
MSTRG.135355.3	NW_004973834.1 : 125434 - 128914	LOC106145952	NW_004973834.1:199132-199404
MSTRG.135355.3	NW_004973834.1 : 125434 - 128914	LOC106145953	NW_004973834.1:185847-203615
MSTRG.135355.3	NW_004973834.1 : 125434 - 128914	LOC106145951	NW_004973834.1:185297-195112
MSTRG.135355.3	NW_004973834.1 : 125434 - 128914	LOC102097308	NW_004973834.1:170659-173340
MSTRG.135355.3	NW_004973834.1 : 125434 - 128914	LOC110354947	NW_004973834.1:167894-169649
MSTRG.135355.3	NW_004973834.1 : 125434 - 128914	LOC106145949	NW_004973834.1:136016-136813
MSTRG.135355.3	NW_004973834.1 : 125434 - 128914	LOC110354944	NW_004973834.1:133250-133759
MSTRG.135355.3	NW_004973834.1 : 125434 - 128914	LOC102094876	NW_004973834.1:119817-121643
MSTRG.135355.3	NW_004973834.1 : 125434 - 128914	LOC102096943	NW_004973834.1:116158-117418
MSTRG.135355.3	NW_004973834.1 : 125434 - 128914	LOC102096761	NW_004973834.1:110007-113247
MSTRG.135134.27	NW_004973832.1 : 406291 - 407966	PDHA1	NW_004973832.1:346754-360186
MSTRG.135134.37	NW_004973832.1 : 444196 - 450335	PDHA1	NW_004973832.1:346754-360186
MSTRG.135045.4	NW_004973831.1 : 145497 - 153964	CLU	NW_004973831.1:96450-100725
MSTRG.135045.4	NW_004973831.1 : 145497 - 153964	SLC35F6	NW_004973831.1:92536-96351
MSTRG.135045.4	NW_004973831.1 : 145497 - 153964	KCNK3	NW_004973831.1:82100-84737
MSTRG.135045.4	NW_004973831.1 : 145497 - 153964	LOC102086252	NW_004973831.1:215032-235536
MSTRG.135045.4	NW_004973831.1 : 145497 - 153964	SCARA5	NW_004973831.1:170174-206593
MSTRG.135045.4	NW_004973831.1 : 145497 - 153964	PBK	NW_004973831.1:161156-167824
MSTRG.135045.4	NW_004973831.1 : 145497 - 153964	CCDC25	NW_004973831.1:123810-137296
MSTRG.135045.4	NW_004973831.1 : 145497 - 153964	SCARA3	NW_004973831.1:104794-120014
MSTRG.134933.12	NW_004973829.1 : 57131 - 58365	RPS16	NW_004973829.1:109281-111919
MSTRG.134123.4	NW_004973817.1 : 200868 - 219194	AGO2	NW_004973817.1:139479-175432
MSTRG.134123.4	NW_004973817.1 : 200868 - 219194	CHRAC1	NW_004973817.1:125513-128632
MSTRG.133952.1	NW_004973811.1 : 41100 - 41589	LOC110366335	NW_004973811.1:75577-85467
MSTRG.133953.15	NW_004973811.1 : 93299 - 96651	LOC110366335	NW_004973811.1:75577-85467
MSTRG.133953.4	NW_004973811.1 : 43055 - 54426	LOC110366335	NW_004973811.1:75577-85467
MSTRG.133755.1	NW_004973809.1 : 4268329 - 4269083	TXNDC5	NW_004973809.1:4345802-4364907
MSTRG.133755.1	NW_004973809.1 : 4268329 - 4269083	BLOC1S5	NW_004973809.1:4290314-4308522
MSTRG.133552.1	NW_004973809.1 : 2832990 - 2842758	TMEM170B	NW_004973809.1:2794632-2816665
MSTRG.133537.1	NW_004973809.1 : 2397070 - 2404681	EDN1	NW_004973809.1:2490913-2495663
MSTRG.133537.1	NW_004973809.1 : 2397070 - 2404681	LOC110366245	NW_004973809.1:2332173-2347569
MSTRG.133478.20	NW_004973809.1 : 1530906 - 1729069	FAM8A1	NW_004973809.1:1804851-1814161
MSTRG.133500.14	NW_004973809.1 : 1698429 - 1703694	CAP2	NW_004973809.1:1728330-1800516
MSTRG.133500.14	NW_004973809.1 : 1698429 - 1703694	STMND1	NW_004973809.1:1652523-1660183
MSTRG.133001.1	NW_004973795.1 : 677949 - 682690	BICRAL	NW_004973795.1:687000-727747
MSTRG.133001.1	NW_004973795.1 : 677949 - 682690	PRPH2	NW_004973795.1:654661-665621
MSTRG.133007.1	NW_004973795.1 : 701600 - 704038	PRPH2	NW_004973795.1:654661-665621
MSTRG.133001.1	NW_004973795.1 : 677949 - 682690	UBR2	NW_004973795.1:589566-643789
MSTRG.132981.6	NW_004973795.1 : 416510 - 417412	MRPS10	NW_004973795.1:447065-460530
MSTRG.132981.6	NW_004973795.1 : 416510 - 417412	DIEXF	NW_004973795.1:432765-450284
MSTRG.133135.15	NW_004973795.1 : 1324416 - 1327796	EML4	NW_004973795.1:1342505-1426876
MSTRG.133135.5	NW_004973795.1 : 1287601 - 1332491	EML4	NW_004973795.1:1342505-1426876
MSTRG.132775.1	NW_004973792.1 : 473194 - 474939	CUNH9orf152	NW_004973792.1:562517-569454
MSTRG.132775.1	NW_004973792.1 : 473194 - 474939	NUB1	NW_004973792.1:535794-554439
MSTRG.132775.1	NW_004973792.1 : 473194 - 474939	LOC102083511	NW_004973792.1:512864-535894
MSTRG.132775.1	NW_004973792.1 : 473194 - 474939	CRYGN	NW_004973792.1:482198-490874
MSTRG.132775.1	NW_004973792.1 : 473194 - 474939	RHEB	NW_004973792.1:435806-472602
MSTRG.132775.1	NW_004973792.1 : 473194 - 474939	PRKAG2	NW_004973792.1:390054-421553
MSTRG.132865.10	NW_004973792.1 : 1999965 - 2037697	LOC102086181	NW_004973792.1:1984470-1995066
MSTRG.132865.10	NW_004973792.1 : 1999965 - 2037697	LOC110366201	NW_004973792.1:1981574-1984111
MSTRG.132865.10	NW_004973792.1 : 1999965 - 2037697	LOC102086004	NW_004973792.1:1972733-1978295
MSTRG.132865.10	NW_004973792.1 : 1999965 - 2037697	XIRP1	NW_004973792.1:1923409-1959389
MSTRG.131832.2	NW_004973782.1 : 1036877 - 1040999	DCAF1	NW_004973782.1:956580-1018760
MSTRG.131832.2	NW_004973782.1 : 1036877 - 1040999	RBM15B	NW_004973782.1:948402-950638
MSTRG.131832.2	NW_004973782.1 : 1036877 - 1040999	MANF	NW_004973782.1:943485-947211
MSTRG.131701.50	NW_004973782.1 : 693692 - 698867	CISH	NW_004973782.1:625346-634470
MSTRG.131732.1	NW_004973782.1 : 600698 - 602959	CISH	NW_004973782.1:625346-634470
MSTRG.131732.1	NW_004973782.1 : 600698 - 602959	HEMK1	NW_004973782.1:529994-563981
MSTRG.131732.1	NW_004973782.1 : 600698 - 602959	CUNH3orf18	NW_004973782.1:520159-534622
MSTRG.131832.2	NW_004973782.1 : 1036877 - 1040999	LOC102095104	NW_004973782.1:1093843-1118066
MSTRG.131250.3	NW_004973781.1 : 150812 - 153690	HACD2	NW_004973781.1:122692-148156
MSTRG.131250.6	NW_004973781.1 : 150832 - 156864	HACD2	NW_004973781.1:122692-148156
MSTRG.131391.1	NW_004973781.1 : 1239050 - 1239823	NIFK	NW_004973781.1:1175803-1180557
MSTRG.131391.1	NW_004973781.1 : 1239050 - 1239823	TSN	NW_004973781.1:1164923-1174981
MSTRG.131391.1	NW_004973781.1 : 1239050 - 1239823	LOC102090370	NW_004973781.1:1142035-1165150
MSTRG.130959.11	NW_004973776.1 : 441964 - 536499	ENPP4	NW_004973776.1:547341-553806
MSTRG.130959.11	NW_004973776.1 : 441964 - 536499	LOC102093880	NW_004973776.1:383098-409493
MSTRG.130959.11	NW_004973776.1 : 441964 - 536499	SLC25A27	NW_004973776.1:372094-400357
MSTRG.130959.11	NW_004973776.1 : 441964 - 536499	TDRD6	NW_004973776.1:357479-369463
MSTRG.130959.11	NW_004973776.1 : 441964 - 536499	PLA2G7	NW_004973776.1:345207-356787
MSTRG.130780.32	NW_004973775.1 : 28108 - 30800	MYO5C	NW_004973775.1:62926-97819
MSTRG.130796.55	NW_004973775.1 : 156240 - 160288	MYO5C	NW_004973775.1:62926-97819
MSTRG.130780.32	NW_004973775.1 : 28108 - 30800	GNB5	NW_004973775.1:33919-58956
MSTRG.130796.55	NW_004973775.1 : 156240 - 160288	FAM214A	NW_004973775.1:201058-214744
MSTRG.130796.55	NW_004973775.1 : 156240 - 160288	ARPP19	NW_004973775.1:184476-191720
MSTRG.130679.2	NW_004973773.1 : 818056 - 826021	HMGB3	NW_004973773.1:867656-871277
MSTRG.130679.2	NW_004973773.1 : 818056 - 826021	CD99L2	NW_004973773.1:794014-809927
MSTRG.130679.2	NW_004973773.1 : 818056 - 826021	MTMR1	NW_004973773.1:754561-790617
MSTRG.130570.8	NW_004973773.1 : 266318 - 268429	LOC102086998	NW_004973773.1:309795-367294
MSTRG.130448.1	NW_004973770.1 : 887966 - 891968	SCIN	NW_004973770.1:911497-983657
MSTRG.130448.1	NW_004973770.1 : 887966 - 891968	ARL4A	NW_004973770.1:893390-895995
MSTRG.129437.3	NW_004973760.1 : 75098 - 76290	MRPL55	NW_004973760.1:48667-50900
MSTRG.129437.3	NW_004973760.1 : 75098 - 76290	GUK1	NW_004973760.1:33185-45573
MSTRG.129437.3	NW_004973760.1 : 75098 - 76290	LOC110365993	NW_004973760.1:18178-31723
MSTRG.128083.1	NW_004973746.1 : 88069 - 88917	LOC110365896	NW_004973746.1:99863-101187
MSTRG.128083.1	NW_004973746.1 : 88069 - 88917	STARD7	NW_004973746.1:93545-96060
MSTRG.128083.1	NW_004973746.1 : 88069 - 88917	TMEM127	NW_004973746.1:83521-86280
MSTRG.128083.1	NW_004973746.1 : 88069 - 88917	CIAO1	NW_004973746.1:80923-82618
MSTRG.128083.1	NW_004973746.1 : 88069 - 88917	SNRNP200	NW_004973746.1:47146-80642
MSTRG.128083.1	NW_004973746.1 : 88069 - 88917	FAM178B	NW_004973746.1:42470-46791
MSTRG.128083.1	NW_004973746.1 : 88069 - 88917	SEMA4C	NW_004973746.1:34391-41436
MSTRG.128083.1	NW_004973746.1 : 88069 - 88917	ANKRD39	NW_004973746.1:32410-34740
MSTRG.128083.1	NW_004973746.1 : 88069 - 88917	CNNM4	NW_004973746.1:20667-29186
MSTRG.128083.1	NW_004973746.1 : 88069 - 88917	LMAN2L	NW_004973746.1:13444-19924
MSTRG.128083.1	NW_004973746.1 : 88069 - 88917	LOC102085773	NW_004973746.1:119105-120688
MSTRG.128083.1	NW_004973746.1 : 88069 - 88917	LOC102085592	NW_004973746.1:115960-117750
MSTRG.128083.1	NW_004973746.1 : 88069 - 88917	LOC102083575	NW_004973746.1:112381-115002
MSTRG.127643.1	NW_004973740.1 : 376148 - 381303	TUBD1	NW_004973740.1:418478-436407
MSTRG.127643.1	NW_004973740.1 : 376148 - 381303	RPS6KB1	NW_004973740.1:400639-416359
MSTRG.127643.1	NW_004973740.1 : 376148 - 381303	RNFT1	NW_004973740.1:391801-402607
MSTRG.127643.1	NW_004973740.1 : 376148 - 381303	MED13	NW_004973740.1:315879-368239
MSTRG.127643.1	NW_004973740.1 : 376148 - 381303	INTS2	NW_004973740.1:299915-316102
MSTRG.127566.27	NW_004973740.1 : 58684 - 66556	TBX2	NW_004973740.1:134020-142419
MSTRG.127566.27	NW_004973740.1 : 58684 - 66556	LOC102094689	NW_004973740.1:100046-121800
MSTRG.127234.20	NW_004973734.1 : 22259 - 31786	LOC102088082	NW_004973734.1:41499-83933
MSTRG.127128.3	NW_004973732.1 : 1311066 - 1316807	ARSG	NW_004973732.1:1395639-1413517
MSTRG.127128.3	NW_004973732.1 : 1311066 - 1316807	WIPI1	NW_004973732.1:1376041-1397938
MSTRG.127128.3	NW_004973732.1 : 1311066 - 1316807	PRKAR1A	NW_004973732.1:1352285-1364015
MSTRG.127128.3	NW_004973732.1 : 1311066 - 1316807	FAM20A	NW_004973732.1:1340785-1350281
MSTRG.127128.3	NW_004973732.1 : 1311066 - 1316807	LOC102098860	NW_004973732.1:1286330-1310621
MSTRG.127128.3	NW_004973732.1 : 1311066 - 1316807	ABCA5	NW_004973732.1:1252807-1284562
MSTRG.126306.1	NW_004973726.1 : 84750 - 85260	RPL12	NW_004973726.1:73386-75658
MSTRG.126306.1	NW_004973726.1 : 84750 - 85260	LOC102096640	NW_004973726.1:67-39240
MSTRG.126306.1	NW_004973726.1 : 84750 - 85260	ZMYND19	NW_004973726.1:57066-64233
MSTRG.126318.54	NW_004973726.1 : 511024 - 544334	ZNF618	NW_004973726.1:547595-638148
MSTRG.126318.70	NW_004973726.1 : 539343 - 544350	ZNF618	NW_004973726.1:547595-638148
MSTRG.126306.1	NW_004973726.1 : 84750 - 85260	DPH7	NW_004973726.1:42225-54992
MSTRG.126306.1	NW_004973726.1 : 84750 - 85260	MRPL41	NW_004973726.1:39049-41037
MSTRG.126306.1	NW_004973726.1 : 84750 - 85260	WDR31	NW_004973726.1:172530-180776
MSTRG.126306.1	NW_004973726.1 : 84750 - 85260	PRPF4	NW_004973726.1:161677-172345
MSTRG.126306.1	NW_004973726.1 : 84750 - 85260	SLC31A1	NW_004973726.1:135354-161609
MSTRG.126306.1	NW_004973726.1 : 84750 - 85260	FKBP15	NW_004973726.1:107758-143663
MSTRG.125328.4	NW_004973717.1 : 1692418 - 1694337	NTN4	NW_004973717.1:1695880-1740685
MSTRG.125328.4	NW_004973717.1 : 1692418 - 1694337	LOC102098075	NW_004973717.1:1634203-1638296
MSTRG.125328.4	NW_004973717.1 : 1692418 - 1694337	AMDHD1	NW_004973717.1:1612401-1630996
MSTRG.125328.4	NW_004973717.1 : 1692418 - 1694337	HAL	NW_004973717.1:1596055-1609356
MSTRG.124826.6	NW_004973707.1 : 2527700 - 2542005	TTC39A	NW_004973707.1:2580236-2614672
MSTRG.124826.7	NW_004973707.1 : 2527713 - 2542005	TTC39A	NW_004973707.1:2580236-2614672
MSTRG.124826.8	NW_004973707.1 : 2527713 - 2542005	TTC39A	NW_004973707.1:2580236-2614672
MSTRG.124826.6	NW_004973707.1 : 2527700 - 2542005	RNF11	NW_004973707.1:2543317-2572169
MSTRG.124826.7	NW_004973707.1 : 2527713 - 2542005	RNF11	NW_004973707.1:2543317-2572169
MSTRG.124826.8	NW_004973707.1 : 2527713 - 2542005	RNF11	NW_004973707.1:2543317-2572169
MSTRG.124826.6	NW_004973707.1 : 2527700 - 2542005	LOC110365612	NW_004973707.1:2509824-2515751
MSTRG.124826.7	NW_004973707.1 : 2527713 - 2542005	LOC110365612	NW_004973707.1:2509824-2515751
MSTRG.124826.8	NW_004973707.1 : 2527713 - 2542005	LOC110365612	NW_004973707.1:2509824-2515751
MSTRG.124826.6	NW_004973707.1 : 2527700 - 2542005	CDKN2C	NW_004973707.1:2502578-2506976
MSTRG.124826.7	NW_004973707.1 : 2527713 - 2542005	CDKN2C	NW_004973707.1:2502578-2506976
MSTRG.124826.8	NW_004973707.1 : 2527713 - 2542005	CDKN2C	NW_004973707.1:2502578-2506976
MSTRG.124389.4	NW_004973698.1 : 256392 - 263063	LOC102097428	NW_004973698.1:288752-290924
MSTRG.124389.4	NW_004973698.1 : 256392 - 263063	LOC102095283	NW_004973698.1:277257-281350
MSTRG.124389.4	NW_004973698.1 : 256392 - 263063	ATCAY	NW_004973698.1:241119-252897
MSTRG.124389.4	NW_004973698.1 : 256392 - 263063	NMRK2	NW_004973698.1:231338-237300
MSTRG.124389.4	NW_004973698.1 : 256392 - 263063	DAPK3	NW_004973698.1:223125-228045
MSTRG.124389.4	NW_004973698.1 : 256392 - 263063	EEF2	NW_004973698.1:214894-222023
MSTRG.124389.4	NW_004973698.1 : 256392 - 263063	PIAS4	NW_004973698.1:192834-213181
MSTRG.124389.4	NW_004973698.1 : 256392 - 263063	ZBTB7A	NW_004973698.1:178449-184052
MSTRG.123762.2	NW_004973692.1 : 158226 - 164419	LOC110365530	NW_004973692.1:234310-234887
MSTRG.123792.1	NW_004973692.1 : 226227 - 228216	LOC110365530	NW_004973692.1:234310-234887
MSTRG.123762.2	NW_004973692.1 : 158226 - 164419	LIN7A	NW_004973692.1:202044-253632
MSTRG.123762.2	NW_004973692.1 : 158226 - 164419	MYF5	NW_004973692.1:178118-183663
MSTRG.123792.1	NW_004973692.1 : 226227 - 228216	MYF5	NW_004973692.1:178118-183663
MSTRG.123762.2	NW_004973692.1 : 158226 - 164419	MYF6	NW_004973692.1:170447-171885
MSTRG.123792.1	NW_004973692.1 : 226227 - 228216	MYF6	NW_004973692.1:170447-171885
MSTRG.120959.1	NW_004973689.1 : 821074 - 838589	HHIPL2	NW_004973689.1:901907-921006
MSTRG.120959.1	NW_004973689.1 : 821074 - 838589	TAF1A	NW_004973689.1:885352-898575
MSTRG.120959.1	NW_004973689.1 : 821074 - 838589	MIA3	NW_004973689.1:853926-880166
MSTRG.121743.7	NW_004973689.1 : 5721425 - 5780287	SOD1	NW_004973689.1:5659425-5665061
MSTRG.121455.1	NW_004973689.1 : 3400330 - 3401347	SETD4	NW_004973689.1:3466688-3479427
MSTRG.121455.1	NW_004973689.1 : 3400330 - 3401347	LOC102094554	NW_004973689.1:3455935-3466955
MSTRG.121455.1	NW_004973689.1 : 3400330 - 3401347	MORC3	NW_004973689.1:3361903-3389042
MSTRG.121455.1	NW_004973689.1 : 3400330 - 3401347	CHAF1B	NW_004973689.1:3339379-3359292
MSTRG.121455.1	NW_004973689.1 : 3400330 - 3401347	CLDN14	NW_004973689.1:3311441-3312910
MSTRG.121255.1	NW_004973689.1 : 2397504 - 2398563	KCNJ15	NW_004973689.1:2443780-2446604
MSTRG.120332.1	NW_004973684.1 : 78256 - 82408	BHLHE40	NW_004973684.1:174299-178146
MSTRG.120364.43	NW_004973684.1 : 248897 - 256158	BHLHE40	NW_004973684.1:174299-178146
MSTRG.120331.2	NW_004973684.1 : 72252 - 73520	ARL8B	NW_004973684.1:139617-145307
MSTRG.120332.1	NW_004973684.1 : 78256 - 82408	ARL8B	NW_004973684.1:139617-145307
MSTRG.120327.1	NW_004973684.1 : 31894 - 36977	EDEM1	NW_004973684.1:120282-133428
MSTRG.120328.1	NW_004973684.1 : 38993 - 41815	EDEM1	NW_004973684.1:120282-133428
MSTRG.120331.2	NW_004973684.1 : 72252 - 73520	EDEM1	NW_004973684.1:120282-133428
MSTRG.120332.1	NW_004973684.1 : 78256 - 82408	EDEM1	NW_004973684.1:120282-133428
MSTRG.120203.1	NW_004973683.1 : 26569 - 34052	MB	NW_004973683.1:72952-78595
MSTRG.120203.1	NW_004973683.1 : 26569 - 34052	RASD2	NW_004973683.1:36892-46030
MSTRG.120156.2	NW_004973682.1 : 81412 - 87301	ANXA11	NW_004973682.1:36356-64371
MSTRG.120156.2	NW_004973682.1 : 81412 - 87301	PLAC9	NW_004973682.1:21837-35396
MSTRG.119806.9	NW_004973680.1 : 4307081 - 4318605	CORO2B	NW_004973680.1:4345351-4379193
MSTRG.119806.9	NW_004973680.1 : 4307081 - 4318605	ANP32A	NW_004973680.1:4318944-4339810
MSTRG.119806.9	NW_004973680.1 : 4307081 - 4318605	NOX5	NW_004973680.1:4274846-4286537
MSTRG.119806.9	NW_004973680.1 : 4307081 - 4318605	GLCE	NW_004973680.1:4220564-4259076
MSTRG.119331.19	NW_004973680.1 : 1221101 - 1223024	LRRC49	NW_004973680.1:1223692-1267630
MSTRG.119331.19	NW_004973680.1 : 1221101 - 1223024	LARP6	NW_004973680.1:1213167-1220540
MSTRG.119331.19	NW_004973680.1 : 1221101 - 1223024	ADAL	NW_004973680.1:1202990-1211123
MSTRG.119331.19	NW_004973680.1 : 1221101 - 1223024	LOC102084049	NW_004973680.1:1197775-1202047
MSTRG.119331.19	NW_004973680.1 : 1221101 - 1223024	LOC102098015	NW_004973680.1:1149045-1196520
MSTRG.118936.40	NW_004973678.1 : 1573770 - 1580095	CCND1	NW_004973678.1:1581778-1599062
MSTRG.118936.40	NW_004973678.1 : 1573770 - 1580095	FGF19	NW_004973678.1:1554965-1560173
MSTRG.118936.40	NW_004973678.1 : 1573770 - 1580095	FGF4	NW_004973678.1:1526180-1529172
MSTRG.118936.40	NW_004973678.1 : 1573770 - 1580095	FGF3	NW_004973678.1:1491258-1497716
MSTRG.118316.1	NW_004973673.1 : 416686 - 417842	PIGY	NW_004973673.1:479774-480644
MSTRG.118316.1	NW_004973673.1 : 416686 - 417842	LOC102090498	NW_004973673.1:467538-486151
MSTRG.118316.1	NW_004973673.1 : 416686 - 417842	IGFBP7	NW_004973673.1:448057-464908
MSTRG.118316.1	NW_004973673.1 : 416686 - 417842	POLR2B	NW_004973673.1:431602-448111
MSTRG.118316.1	NW_004973673.1 : 416686 - 417842	NOA1	NW_004973673.1:422213-430753
MSTRG.118316.1	NW_004973673.1 : 416686 - 417842	REST	NW_004973673.1:401407-416669
MSTRG.118316.1	NW_004973673.1 : 416686 - 417842	SARAF	NW_004973673.1:379188-388047
MSTRG.118316.1	NW_004973673.1 : 416686 - 417842	LOC102089953	NW_004973673.1:374918-379019
MSTRG.118316.1	NW_004973673.1 : 416686 - 417842	SRP72	NW_004973673.1:356295-371493
MSTRG.118316.1	NW_004973673.1 : 416686 - 417842	ARL9	NW_004973673.1:349582-355227
MSTRG.118316.1	NW_004973673.1 : 416686 - 417842	THEGL	NW_004973673.1:340020-348543
MSTRG.118316.1	NW_004973673.1 : 416686 - 417842	HOPX	NW_004973673.1:330650-338678
MSTRG.117449.2	NW_004973662.1 : 306211 - 338288	SCRG1	NW_004973662.1:420499-428607
MSTRG.117449.2	NW_004973662.1 : 306211 - 338288	LOC110365031	NW_004973662.1:345712-347323
MSTRG.117305.16	NW_004973657.1 : 1570954 - 1573145	NKX6-3	NW_004973657.1:1665118-1667467
MSTRG.117305.16	NW_004973657.1 : 1570954 - 1573145	GPAT4	NW_004973657.1:1654103-1660752
MSTRG.117323.1	NW_004973657.1 : 1566193 - 1566529	GPAT4	NW_004973657.1:1654103-1660752
MSTRG.117305.16	NW_004973657.1 : 1570954 - 1573145	LOC102087059	NW_004973657.1:1651758-1652411
MSTRG.117323.1	NW_004973657.1 : 1566193 - 1566529	LOC102087059	NW_004973657.1:1651758-1652411
MSTRG.117305.16	NW_004973657.1 : 1570954 - 1573145	GINS4	NW_004973657.1:1646369-1650266
MSTRG.117323.1	NW_004973657.1 : 1566193 - 1566529	GINS4	NW_004973657.1:1646369-1650266
MSTRG.117305.16	NW_004973657.1 : 1570954 - 1573145	SFRP1	NW_004973657.1:1618046-1629859
MSTRG.117323.1	NW_004973657.1 : 1566193 - 1566529	SFRP1	NW_004973657.1:1618046-1629859
MSTRG.117305.16	NW_004973657.1 : 1570954 - 1573145	CUNH8orf4	NW_004973657.1:1514635-1515192
MSTRG.117323.1	NW_004973657.1 : 1566193 - 1566529	CUNH8orf4	NW_004973657.1:1514635-1515192
MSTRG.117305.16	NW_004973657.1 : 1570954 - 1573145	IDO2	NW_004973657.1:1496049-1501471
MSTRG.117323.1	NW_004973657.1 : 1566193 - 1566529	IDO2	NW_004973657.1:1496049-1501471
MSTRG.117305.16	NW_004973657.1 : 1570954 - 1573145	LOC102086134	NW_004973657.1:1492756-1496028
MSTRG.117323.1	NW_004973657.1 : 1566193 - 1566529	LOC102086134	NW_004973657.1:1492756-1496028
MSTRG.117305.16	NW_004973657.1 : 1570954 - 1573145	LOC110365004	NW_004973657.1:1489673-1491213
MSTRG.117323.1	NW_004973657.1 : 1566193 - 1566529	LOC110365004	NW_004973657.1:1489673-1491213
MSTRG.117305.16	NW_004973657.1 : 1570954 - 1573145	LOC102085949	NW_004973657.1:1483876-1487558
MSTRG.117323.1	NW_004973657.1 : 1566193 - 1566529	LOC102085949	NW_004973657.1:1483876-1487558
MSTRG.117305.16	NW_004973657.1 : 1570954 - 1573145	LOC110365003	NW_004973657.1:1481846-1483807
MSTRG.117323.1	NW_004973657.1 : 1566193 - 1566529	LOC110365003	NW_004973657.1:1481846-1483807
MSTRG.116345.11	NW_004973647.1 : 695823 - 698791	FANCB	NW_004973647.1:678520-695708
MSTRG.116345.11	NW_004973647.1 : 695823 - 698791	MOSPD2	NW_004973647.1:645195-678158
MSTRG.116065.1	NW_004973646.1 : 290394 - 292332	PRSS23	NW_004973646.1:361671-364872
MSTRG.116106.1	NW_004973646.1 : 449801 - 451826	PRSS23	NW_004973646.1:361671-364872
MSTRG.116065.1	NW_004973646.1 : 290394 - 292332	FZD4	NW_004973646.1:267595-273007
MSTRG.115732.1	NW_004973642.1 : 737257 - 741171	ESF1	NW_004973642.1:767469-798484
MSTRG.115733.3	NW_004973642.1 : 745754 - 747341	ESF1	NW_004973642.1:767469-798484
MSTRG.115732.1	NW_004973642.1 : 737257 - 741171	NDUFAF5	NW_004973642.1:759281-766995
MSTRG.115733.3	NW_004973642.1 : 745754 - 747341	NDUFAF5	NW_004973642.1:759281-766995
MSTRG.115790.1	NW_004973642.1 : 1804470 - 1805515	SNAP25	NW_004973642.1:1830634-1859679
MSTRG.115790.1	NW_004973642.1 : 1804470 - 1805515	MKKS	NW_004973642.1:1796025-1804309
MSTRG.115628.11	NW_004973641.1 : 62402 - 66545	EAF1	NW_004973641.1:79654-101041
MSTRG.115636.20	NW_004973641.1 : 111196 - 114155	EAF1	NW_004973641.1:79654-101041
MSTRG.115628.11	NW_004973641.1 : 62402 - 66545	MTURN	NW_004973641.1:49025-62287
MSTRG.115636.20	NW_004973641.1 : 111196 - 114155	MTURN	NW_004973641.1:49025-62287
MSTRG.115636.20	NW_004973641.1 : 111196 - 114155	SH3BP5	NW_004973641.1:143534-195523
MSTRG.115628.11	NW_004973641.1 : 62402 - 66545	METTL6	NW_004973641.1:100889-110979
MSTRG.115636.20	NW_004973641.1 : 111196 - 114155	METTL6	NW_004973641.1:100889-110979
MSTRG.115236.1	NW_004973640.1 : 702216 - 715096	SYNPO2	NW_004973640.1:715246-806691
MSTRG.115236.1	NW_004973640.1 : 702216 - 715096	METTL14	NW_004973640.1:623155-646795
MSTRG.114917.1	NW_004973637.1 : 413951 - 428206	SEC22C	NW_004973637.1:489232-515429
MSTRG.114919.1	NW_004973637.1 : 428132 - 431049	SEC22C	NW_004973637.1:489232-515429
MSTRG.114923.1	NW_004973637.1 : 471339 - 515429	NKTR	NW_004973637.1:412082-460633
MSTRG.114891.28	NW_004973637.1 : 412082 - 551629	ZBTB47	NW_004973637.1:373113-385620
MSTRG.114917.1	NW_004973637.1 : 413951 - 428206	ZBTB47	NW_004973637.1:373113-385620
MSTRG.114919.1	NW_004973637.1 : 428132 - 431049	ZBTB47	NW_004973637.1:373113-385620
MSTRG.114923.1	NW_004973637.1 : 471339 - 515429	ZBTB47	NW_004973637.1:373113-385620
MSTRG.114891.28	NW_004973637.1 : 412082 - 551629	KLHL40	NW_004973637.1:356055-371113
MSTRG.114917.1	NW_004973637.1 : 413951 - 428206	KLHL40	NW_004973637.1:356055-371113
MSTRG.114919.1	NW_004973637.1 : 428132 - 431049	KLHL40	NW_004973637.1:356055-371113
MSTRG.114891.28	NW_004973637.1 : 412082 - 551629	HHATL	NW_004973637.1:337638-353663
MSTRG.114917.1	NW_004973637.1 : 413951 - 428206	HHATL	NW_004973637.1:337638-353663
MSTRG.114919.1	NW_004973637.1 : 428132 - 431049	HHATL	NW_004973637.1:337638-353663
MSTRG.114849.42	NW_004973636.1 : 964667 - 967910	THOC7	NW_004973636.1:990285-999511
MSTRG.114849.42	NW_004973636.1 : 964667 - 967910	ATXN7	NW_004973636.1:903258-963438
MSTRG.114849.42	NW_004973636.1 : 964667 - 967910	PSMD6	NW_004973636.1:890013-895213
MSTRG.114849.42	NW_004973636.1 : 964667 - 967910	SNTN	NW_004973636.1:1037237-1040041
MSTRG.114665.10	NW_004973635.1 : 301500 - 344189	PFN2	NW_004973635.1:273964-276483
MSTRG.114696.1	NW_004973635.1 : 344668 - 348775	PFN2	NW_004973635.1:273964-276483
MSTRG.114665.10	NW_004973635.1 : 301500 - 344189	RNF13	NW_004973635.1:253330-269998
MSTRG.114696.1	NW_004973635.1 : 344668 - 348775	RNF13	NW_004973635.1:253330-269998
MSTRG.114665.10	NW_004973635.1 : 301500 - 344189	COMMD2	NW_004973635.1:244755-248320
MSTRG.114696.1	NW_004973635.1 : 344668 - 348775	COMMD2	NW_004973635.1:244755-248320
MSTRG.114540.51	NW_004973633.1 : 423588 - 473244	DNAJC27	NW_004973633.1:550320-560254
MSTRG.114540.51	NW_004973633.1 : 423588 - 473244	ADCY3	NW_004973633.1:529616-547900
MSTRG.114540.51	NW_004973633.1 : 423588 - 473244	CENPO	NW_004973633.1:522601-530021
MSTRG.114540.51	NW_004973633.1 : 423588 - 473244	PTRHD1	NW_004973633.1:520948-522893
MSTRG.114365.1	NW_004973630.1 : 137978 - 140381	USP45	NW_004973630.1:81785-137216
MSTRG.114365.1	NW_004973630.1 : 137978 - 140381	PNISR	NW_004973630.1:45001-75558
MSTRG.114365.1	NW_004973630.1 : 137978 - 140381	CCNC	NW_004973630.1:145274-163820
MSTRG.114365.1	NW_004973630.1 : 137978 - 140381	TSTD3	NW_004973630.1:140827-143031
MSTRG.113399.1	NW_004973623.1 : 258452 - 270646	DUSP16	NW_004973623.1:281894-323051
MSTRG.113399.1	NW_004973623.1 : 258452 - 270646	MANSC1	NW_004973623.1:191058-197685
MSTRG.113346.1	NW_004973622.1 : 1503941 - 1504549	HDAC10	NW_004973622.1:1533980-1552451
MSTRG.113346.1	NW_004973622.1 : 1503941 - 1504549	TUBGCP6	NW_004973622.1:1510517-1532676
MSTRG.113346.1	NW_004973622.1 : 1503941 - 1504549	SELENOO	NW_004973622.1:1489173-1503914
MSTRG.113346.1	NW_004973622.1 : 1503941 - 1504549	TRABD	NW_004973622.1:1456295-1481918
MSTRG.113346.1	NW_004973622.1 : 1503941 - 1504549	LOC102090311	NW_004973622.1:1423327-1425922
MSTRG.112897.5	NW_004973619.1 : 2675513 - 2681993	LOC102090135	NW_004973619.1:2770157-2773676
MSTRG.112897.5	NW_004973619.1 : 2675513 - 2681993	HSD11B1	NW_004973619.1:2763944-2768809
MSTRG.112897.5	NW_004973619.1 : 2675513 - 2681993	G0S2	NW_004973619.1:2757102-2757732
MSTRG.112897.5	NW_004973619.1 : 2675513 - 2681993	LAMB3	NW_004973619.1:2721960-2749092
MSTRG.112897.5	NW_004973619.1 : 2675513 - 2681993	CAMK1G	NW_004973619.1:2707975-2721794
MSTRG.112028.1	NW_004973614.1 : 174989 - 175589	PROSER2	NW_004973614.1:81290-107190
MSTRG.112006.3	NW_004973614.1 : 90563 - 98727	ECHDC3	NW_004973614.1:50679-58375
MSTRG.112009.1	NW_004973614.1 : 88592 - 90366	ECHDC3	NW_004973614.1:50679-58375
MSTRG.112034.1	NW_004973614.1 : 231136 - 231906	CDC123	NW_004973614.1:246361-284022
MSTRG.112035.11	NW_004973614.1 : 290211 - 294954	CDC123	NW_004973614.1:246361-284022
MSTRG.112028.1	NW_004973614.1 : 174989 - 175589	NUDT5	NW_004973614.1:232474-246660
MSTRG.112034.1	NW_004973614.1 : 231136 - 231906	NUDT5	NW_004973614.1:232474-246660
MSTRG.112035.11	NW_004973614.1 : 290211 - 294954	NUDT5	NW_004973614.1:232474-246660
MSTRG.112028.1	NW_004973614.1 : 174989 - 175589	SEC61A2	NW_004973614.1:201372-230981
MSTRG.112034.1	NW_004973614.1 : 231136 - 231906	SEC61A2	NW_004973614.1:201372-230981
MSTRG.112035.11	NW_004973614.1 : 290211 - 294954	SEC61A2	NW_004973614.1:201372-230981
MSTRG.112028.1	NW_004973614.1 : 174989 - 175589	DHTKD1	NW_004973614.1:189257-206947
MSTRG.112034.1	NW_004973614.1 : 231136 - 231906	DHTKD1	NW_004973614.1:189257-206947
MSTRG.112006.3	NW_004973614.1 : 90563 - 98727	UPF2	NW_004973614.1:128932-176184
MSTRG.112009.1	NW_004973614.1 : 88592 - 90366	UPF2	NW_004973614.1:128932-176184
MSTRG.111554.41	NW_004973609.1 : 843808 - 870156	TRAF3IP2	NW_004973609.1:906832-938438
MSTRG.111458.13	NW_004973609.1 : 29316 - 30305	GPR6	NW_004973609.1:87129-88878
MSTRG.111496.41	NW_004973609.1 : 736685 - 740264	MFSD4B	NW_004973609.1:741591-749444
MSTRG.111496.41	NW_004973609.1 : 736685 - 740264	SLC16A10	NW_004973609.1:667466-734559
MSTRG.111501.30	NW_004973609.1 : 508414 - 519591	AMD1	NW_004973609.1:592478-603598
MSTRG.111019.6	NW_004973606.1 : 343080 - 355680	MSC	NW_004973606.1:439100-441491
MSTRG.110865.32	NW_004973605.1 : 206344 - 210385	ZBTB44	NW_004973605.1:290631-304929
MSTRG.110865.32	NW_004973605.1 : 206344 - 210385	ADAMTS8	NW_004973605.1:258777-268493
MSTRG.110865.32	NW_004973605.1 : 206344 - 210385	ADAMTS15	NW_004973605.1:238438-247051
MSTRG.110716.1	NW_004973602.1 : 2661521 - 2666180	LOC110364446	NW_004973602.1:2646056-2655687
MSTRG.110716.1	NW_004973602.1 : 2661521 - 2666180	TGFBR1	NW_004973602.1:2614779-2660562
MSTRG.110227.2	NW_004973599.1 : 1 - 22802	ASB14	NW_004973599.1:73595-103740
MSTRG.110227.2	NW_004973599.1 : 1 - 22802	APPL1	NW_004973599.1:71040-94182
MSTRG.110227.2	NW_004973599.1 : 1 - 22802	HESX1	NW_004973599.1:48081-70562
MSTRG.110227.2	NW_004973599.1 : 1 - 22802	IL17RD	NW_004973599.1:23229-63808
MSTRG.109909.34	NW_004973596.1 : 728003 - 739304	FAM83F	NW_004973596.1:655133-691970
MSTRG.109472.3	NW_004973595.1 : 247479 - 249619	CEP152	NW_004973595.1:267314-302594
MSTRG.109472.3	NW_004973595.1 : 247479 - 249619	SECISBP2L	NW_004973595.1:203980-229443
MSTRG.109472.3	NW_004973595.1 : 247479 - 249619	COPS2	NW_004973595.1:173737-196874
MSTRG.109725.13	NW_004973595.1 : 1566727 - 1568803	LEO1	NW_004973595.1:1591354-1601910
MSTRG.109725.13	NW_004973595.1 : 1566727 - 1568803	LOC102091453	NW_004973595.1:1572613-1588263
MSTRG.109725.13	NW_004973595.1 : 1566727 - 1568803	LOC102091144	NW_004973595.1:1532575-1550062
MSTRG.109725.13	NW_004973595.1 : 1566727 - 1568803	LYSMD2	NW_004973595.1:1500304-1510200
MSTRG.109725.13	NW_004973595.1 : 1566727 - 1568803	SCG3	NW_004973595.1:1471687-1495442
MSTRG.109200.1	NW_004973590.1 : 40579 - 121816	GKAP1	NW_004973590.1:192518-213187
MSTRG.109200.1	NW_004973590.1 : 40579 - 121816	KIF27	NW_004973590.1:157379-191142
MSTRG.109200.1	NW_004973590.1 : 40579 - 121816	CUNH9orf64	NW_004973590.1:150342-156937
MSTRG.109200.1	NW_004973590.1 : 40579 - 121816	HNRNPK	NW_004973590.1:127622-148675
MSTRG.109200.1	NW_004973590.1 : 40579 - 121816	RMI1	NW_004973590.1:122737-127729
MSTRG.108600.6	NW_004973582.1 : 1243011 - 1281841	RNF212	NW_004973582.1:1167830-1185869
MSTRG.108600.6	NW_004973582.1 : 1243011 - 1281841	LOC102084417	NW_004973582.1:1159402-1166748
MSTRG.108368.1	NW_004973581.1 : 421488 - 423232	RBBP7	NW_004973581.1:339440-348214
MSTRG.108315.1	NW_004973580.1 : 100169 - 105763	LOC102095410	NW_004973580.1:88838-95201
MSTRG.108315.2	NW_004973580.1 : 100172 - 104411	LOC102095410	NW_004973580.1:88838-95201
MSTRG.108315.1	NW_004973580.1 : 100169 - 105763	CRTC2	NW_004973580.1:77473-86435
MSTRG.108315.2	NW_004973580.1 : 100172 - 104411	CRTC2	NW_004973580.1:77473-86435
MSTRG.108315.1	NW_004973580.1 : 100169 - 105763	LOC102095222	NW_004973580.1:63490-67450
MSTRG.108315.2	NW_004973580.1 : 100172 - 104411	LOC102095222	NW_004973580.1:63490-67450
MSTRG.108315.1	NW_004973580.1 : 100169 - 105763	RPS27	NW_004973580.1:61268-63315
MSTRG.108315.2	NW_004973580.1 : 100172 - 104411	RPS27	NW_004973580.1:61268-63315
MSTRG.108315.1	NW_004973580.1 : 100169 - 105763	TPM3	NW_004973580.1:48127-58798
MSTRG.108315.2	NW_004973580.1 : 100172 - 104411	TPM3	NW_004973580.1:48127-58798
MSTRG.108315.1	NW_004973580.1 : 100169 - 105763	CUNH1orf43	NW_004973580.1:36379-38885
MSTRG.108315.2	NW_004973580.1 : 100172 - 104411	CUNH1orf43	NW_004973580.1:36379-38885
MSTRG.108315.1	NW_004973580.1 : 100169 - 105763	UBAP2L	NW_004973580.1:13170-33079
MSTRG.108315.2	NW_004973580.1 : 100172 - 104411	UBAP2L	NW_004973580.1:13170-33079
MSTRG.108315.1	NW_004973580.1 : 100169 - 105763	GATAD2B	NW_004973580.1:113212-122583
MSTRG.108315.2	NW_004973580.1 : 100172 - 104411	GATAD2B	NW_004973580.1:113212-122583
MSTRG.108315.1	NW_004973580.1 : 100169 - 105763	HAX1	NW_004973580.1:10118-11635
MSTRG.108315.2	NW_004973580.1 : 100172 - 104411	HAX1	NW_004973580.1:10118-11635
MSTRG.108236.3	NW_004973579.1 : 311522 - 318187	MGMT	NW_004973579.1:223672-296908
MSTRG.107773.1	NW_004973577.1 : 16151 - 18852	SCGN	NW_004973577.1:27008-54054
MSTRG.107773.1	NW_004973577.1 : 16151 - 18852	LOC102093760	NW_004973577.1:2171-15942
MSTRG.107262.2	NW_004973575.1 : 172446 - 174408	LOC102086866	NW_004973575.1:83501-116944
MSTRG.107262.2	NW_004973575.1 : 172446 - 174408	M6PR	NW_004973575.1:265867-269635
MSTRG.107262.2	NW_004973575.1 : 172446 - 174408	LOC102097712	NW_004973575.1:248892-263734
MSTRG.107262.2	NW_004973575.1 : 172446 - 174408	LOC102097889	NW_004973575.1:227838-247832
MSTRG.107262.2	NW_004973575.1 : 172446 - 174408	LOC102097046	NW_004973575.1:134674-162599
MSTRG.106997.24	NW_004973571.1 : 226585 - 230466	PHLPP1	NW_004973571.1:248336-312725
MSTRG.106410.2	NW_004973569.1 : 1677100 - 1678269	LOC102089456	NW_004973569.1:1767059-1771435
MSTRG.106410.2	NW_004973569.1 : 1677100 - 1678269	INPP5B	NW_004973569.1:1752800-1765987
MSTRG.106410.2	NW_004973569.1 : 1677100 - 1678269	MTF1	NW_004973569.1:1742016-1752271
MSTRG.106410.2	NW_004973569.1 : 1677100 - 1678269	YRDC	NW_004973569.1:1734150-1741591
MSTRG.106410.2	NW_004973569.1 : 1677100 - 1678269	EPHA10	NW_004973569.1:1688649-1711474
MSTRG.106410.2	NW_004973569.1 : 1677100 - 1678269	CDCA8	NW_004973569.1:1679448-1682605
MSTRG.106410.2	NW_004973569.1 : 1677100 - 1678269	RSPO1	NW_004973569.1:1607591-1620308
MSTRG.106410.2	NW_004973569.1 : 1677100 - 1678269	GNL2	NW_004973569.1:1593391-1602970
MSTRG.106410.2	NW_004973569.1 : 1677100 - 1678269	DNALI1	NW_004973569.1:1589226-1592829
MSTRG.106410.2	NW_004973569.1 : 1677100 - 1678269	SNIP1	NW_004973569.1:1586724-1593032
MSTRG.106410.2	NW_004973569.1 : 1677100 - 1678269	MEAF6	NW_004973569.1:1579846-1585905
MSTRG.106336.1	NW_004973569.1 : 1257645 - 1259429	CSF3R	NW_004973569.1:1292991-1301209
MSTRG.106336.1	NW_004973569.1 : 1257645 - 1259429	MRPS15	NW_004973569.1:1289049-1292777
MSTRG.106336.1	NW_004973569.1 : 1257645 - 1259429	OSCP1	NW_004973569.1:1280802-1288277
MSTRG.106336.1	NW_004973569.1 : 1257645 - 1259429	STK40	NW_004973569.1:1260495-1274090
MSTRG.106336.1	NW_004973569.1 : 1257645 - 1259429	THRAP3	NW_004973569.1:1234566-1252052
MSTRG.106336.1	NW_004973569.1 : 1257645 - 1259429	MAP7D1	NW_004973569.1:1221567-1229755
MSTRG.106298.1	NW_004973569.1 : 1122078 - 1126397	LOC102087234	NW_004973569.1:1209172-1213323
MSTRG.106336.1	NW_004973569.1 : 1257645 - 1259429	LOC102087234	NW_004973569.1:1209172-1213323
MSTRG.106298.1	NW_004973569.1 : 1122078 - 1126397	TRAPPC3	NW_004973569.1:1202256-1207024
MSTRG.106336.1	NW_004973569.1 : 1257645 - 1259429	TRAPPC3	NW_004973569.1:1202256-1207024
MSTRG.106298.1	NW_004973569.1 : 1122078 - 1126397	COL8A2	NW_004973569.1:1162173-1189321
MSTRG.106336.1	NW_004973569.1 : 1257645 - 1259429	COL8A2	NW_004973569.1:1162173-1189321
MSTRG.106298.1	NW_004973569.1 : 1122078 - 1126397	ADPRHL2	NW_004973569.1:1156594-1161233
MSTRG.106298.1	NW_004973569.1 : 1122078 - 1126397	TEKT2	NW_004973569.1:1150963-1155609
MSTRG.106298.1	NW_004973569.1 : 1122078 - 1126397	LOC102089206	NW_004973569.1:1101666-1115761
MSTRG.106298.1	NW_004973569.1 : 1122078 - 1126397	LOC102089010	NW_004973569.1:1078517-1094562
MSTRG.106298.1	NW_004973569.1 : 1122078 - 1126397	CLSPN	NW_004973569.1:1063854-1078795
MSTRG.106298.1	NW_004973569.1 : 1122078 - 1126397	CUNH1orf216	NW_004973569.1:1050148-1052273
MSTRG.106021.2	NW_004973568.1 : 951416 - 957373	PLEKHB2	NW_004973568.1:924635-935022
MSTRG.105872.2	NW_004973567.1 : 77048 - 80074	LOC102094977	NW_004973567.1:84817-97357
MSTRG.105864.38	NW_004973567.1 : 62660 - 149929	BRD4	NW_004973567.1:6784-54427
MSTRG.105872.2	NW_004973567.1 : 77048 - 80074	BRD4	NW_004973567.1:6784-54427
MSTRG.105864.38	NW_004973567.1 : 62660 - 149929	LOC102095786	NW_004973567.1:193782-202164
MSTRG.105872.2	NW_004973567.1 : 77048 - 80074	WIZ	NW_004973567.1:103020-127479
MSTRG.105632.2	NW_004973558.1 : 613628 - 616665	CBR4	NW_004973558.1:525256-545964
MSTRG.105192.1	NW_004973555.1 : 1221698 - 1222455	OPN4	NW_004973555.1:1225704-1271120
MSTRG.104528.3	NW_004973553.1 : 1017188 - 1020133	ARHGEF37	NW_004973553.1:985145-998357
MSTRG.104530.7	NW_004973553.1 : 1049056 - 1049942	ARHGEF37	NW_004973553.1:985145-998357
MSTRG.104528.3	NW_004973553.1 : 1017188 - 1020133	CSNK1A1	NW_004973553.1:932760-968339
MSTRG.104435.18	NW_004973553.1 : 617134 - 630801	STK10	NW_004973553.1:527863-561825
MSTRG.104528.3	NW_004973553.1 : 1017188 - 1020133	PPARGC1B	NW_004973553.1:1051418-1064209
MSTRG.104530.7	NW_004973553.1 : 1049056 - 1049942	PPARGC1B	NW_004973553.1:1051418-1064209
MSTRG.103505.1	NW_004973552.1 : 663648 - 672804	MSH5	NW_004973552.1:640475-647907
MSTRG.103079.1	NW_004973549.1 : 52268 - 54158	MSN	NW_004973549.1:95727-126486
MSTRG.103079.1	NW_004973549.1 : 52268 - 54158	LOC102086796	NW_004973549.1:70234-75105
MSTRG.103079.1	NW_004973549.1 : 52268 - 54158	ZC3H12B	NW_004973549.1:24963-41789
MSTRG.103079.1	NW_004973549.1 : 52268 - 54158	ZC4H2	NW_004973549.1:1445-14999
MSTRG.103079.1	NW_004973549.1 : 52268 - 54158	LOC102086986	NW_004973549.1:132245-135944
MSTRG.102814.3	NW_004973544.1 : 656191 - 663442	LOC102096448	NW_004973544.1:758471-762527
MSTRG.102810.19	NW_004973544.1 : 655638 - 657891	CCDC124	NW_004973544.1:742206-750669
MSTRG.102814.3	NW_004973544.1 : 656191 - 663442	CCDC124	NW_004973544.1:742206-750669
MSTRG.102810.19	NW_004973544.1 : 655638 - 657891	SLC5A5	NW_004973544.1:736134-739577
MSTRG.102814.3	NW_004973544.1 : 656191 - 663442	SLC5A5	NW_004973544.1:736134-739577
MSTRG.102810.19	NW_004973544.1 : 655638 - 657891	JAK3	NW_004973544.1:726797-734350
MSTRG.102814.3	NW_004973544.1 : 656191 - 663442	JAK3	NW_004973544.1:726797-734350
MSTRG.102810.19	NW_004973544.1 : 655638 - 657891	B3GNT3	NW_004973544.1:725057-726247
MSTRG.102814.3	NW_004973544.1 : 656191 - 663442	B3GNT3	NW_004973544.1:725057-726247
MSTRG.102810.19	NW_004973544.1 : 655638 - 657891	FCHO1	NW_004973544.1:715508-721845
MSTRG.102814.3	NW_004973544.1 : 656191 - 663442	FCHO1	NW_004973544.1:715508-721845
MSTRG.102810.19	NW_004973544.1 : 655638 - 657891	MAP1S	NW_004973544.1:702278-711138
MSTRG.102814.3	NW_004973544.1 : 656191 - 663442	MAP1S	NW_004973544.1:702278-711138
MSTRG.102810.19	NW_004973544.1 : 655638 - 657891	GADD45B	NW_004973544.1:698079-699074
MSTRG.102814.3	NW_004973544.1 : 656191 - 663442	GADD45B	NW_004973544.1:698079-699074
MSTRG.102810.19	NW_004973544.1 : 655638 - 657891	DIRAS1	NW_004973544.1:640977-641599
MSTRG.102814.3	NW_004973544.1 : 656191 - 663442	DIRAS1	NW_004973544.1:640977-641599
MSTRG.102810.19	NW_004973544.1 : 655638 - 657891	SLC39A3	NW_004973544.1:633865-637830
MSTRG.102814.3	NW_004973544.1 : 656191 - 663442	SLC39A3	NW_004973544.1:633865-637830
MSTRG.102810.19	NW_004973544.1 : 655638 - 657891	SGTA	NW_004973544.1:624870-630894
MSTRG.102814.3	NW_004973544.1 : 656191 - 663442	SGTA	NW_004973544.1:624870-630894
MSTRG.102810.19	NW_004973544.1 : 655638 - 657891	THOP1	NW_004973544.1:617600-623523
MSTRG.102814.3	NW_004973544.1 : 656191 - 663442	THOP1	NW_004973544.1:617600-623523
MSTRG.102810.19	NW_004973544.1 : 655638 - 657891	ADAMTSL5	NW_004973544.1:609892-613484
MSTRG.102814.3	NW_004973544.1 : 656191 - 663442	ADAMTSL5	NW_004973544.1:609892-613484
MSTRG.102810.19	NW_004973544.1 : 655638 - 657891	LOC102094740	NW_004973544.1:601893-609198
MSTRG.102814.3	NW_004973544.1 : 656191 - 663442	LOC102094740	NW_004973544.1:601893-609198
MSTRG.102810.19	NW_004973544.1 : 655638 - 657891	PCSK4	NW_004973544.1:600996-606200
MSTRG.102814.3	NW_004973544.1 : 656191 - 663442	PCSK4	NW_004973544.1:600996-606200
MSTRG.102810.19	NW_004973544.1 : 655638 - 657891	REEP6	NW_004973544.1:597474-599953
MSTRG.102814.3	NW_004973544.1 : 656191 - 663442	REEP6	NW_004973544.1:597474-599953
MSTRG.102810.19	NW_004973544.1 : 655638 - 657891	APC2	NW_004973544.1:583089-595356
MSTRG.102814.3	NW_004973544.1 : 656191 - 663442	APC2	NW_004973544.1:583089-595356
MSTRG.102810.19	NW_004973544.1 : 655638 - 657891	RPS15	NW_004973544.1:575782-578136
MSTRG.102814.3	NW_004973544.1 : 656191 - 663442	RPS15	NW_004973544.1:575782-578136
MSTRG.102423.2	NW_004973541.1 : 7209 - 67812	TRIP4	NW_004973541.1:77003-106485
MSTRG.102423.4	NW_004973541.1 : 7431 - 11001	TRIP4	NW_004973541.1:77003-106485
MSTRG.102423.5	NW_004973541.1 : 7431 - 10993	TRIP4	NW_004973541.1:77003-106485
MSTRG.102168.1	NW_004973537.1 : 2364852 - 2367012	ELOC	NW_004973537.1:2428243-2432628
MSTRG.102168.1	NW_004973537.1 : 2364852 - 2367012	TMEM70	NW_004973537.1:2416619-2418553
MSTRG.102168.1	NW_004973537.1 : 2364852 - 2367012	LY96	NW_004973537.1:2401792-2407783
MSTRG.101447.13	NW_004973536.1 : 336693 - 970682	EI24	NW_004973536.1:323819-328852
MSTRG.101447.13	NW_004973536.1 : 336693 - 970682	STT3A	NW_004973536.1:313845-320858
MSTRG.101447.13	NW_004973536.1 : 336693 - 970682	CHEK1	NW_004973536.1:305395-311463
MSTRG.101447.13	NW_004973536.1 : 336693 - 970682	CDON	NW_004973536.1:253606-283024
MSTRG.101447.13	NW_004973536.1 : 336693 - 970682	DDX25	NW_004973536.1:238910-246227
MSTRG.101447.13	NW_004973536.1 : 336693 - 970682	UBASH3B	NW_004973536.1:1044087-1064021
MSTRG.101373.2	NW_004973535.1 : 140893 - 142461	LOC110363743	NW_004973535.1:93162-99430
MSTRG.101373.2	NW_004973535.1 : 140893 - 142461	SMYD5	NW_004973535.1:54575-63554
MSTRG.101373.2	NW_004973535.1 : 140893 - 142461	PRADC1	NW_004973535.1:51148-54307
MSTRG.101378.78	NW_004973535.1 : 367972 - 422849	SPR	NW_004973535.1:274658-275962
MSTRG.101373.2	NW_004973535.1 : 140893 - 142461	SFXN5	NW_004973535.1:143402-241129
MSTRG.101373.2	NW_004973535.1 : 140893 - 142461	LOC102093218	NW_004973535.1:114436-139822
MSTRG.101060.28	NW_004973530.1 : 21410 - 25600	LOC102087960	NW_004973530.1:52741-78263
MSTRG.101075.1	NW_004973530.1 : 149396 - 470324	LOC102087960	NW_004973530.1:52741-78263
MSTRG.101060.28	NW_004973530.1 : 21410 - 25600	MYD88	NW_004973530.1:37058-51730
MSTRG.100767.2	NW_004973529.1 : 664386 - 667241	LOC102098849	NW_004973529.1:671257-701892
MSTRG.100767.2	NW_004973529.1 : 664386 - 667241	VBP1	NW_004973529.1:658667-664278
MSTRG.100767.2	NW_004973529.1 : 664386 - 667241	LOC102086612	NW_004973529.1:647448-656387
MSTRG.100603.49	NW_004973527.1 : 1385680 - 1396233	LOC102097417	NW_004973527.1:1477767-1482880
MSTRG.100603.49	NW_004973527.1 : 1385680 - 1396233	CDS1	NW_004973527.1:1422341-1450411
MSTRG.100601.2	NW_004973527.1 : 1200903 - 1202298	PPM1K	NW_004973527.1:1203037-1215636
MSTRG.100267.1	NW_004973526.1 : 711595 - 712554	RNH1	NW_004973526.1:745296-759111
MSTRG.100267.1	NW_004973526.1 : 711595 - 712554	CHKA	NW_004973526.1:669635-691422
MSTRG.100307.1	NW_004973526.1 : 955084 - 961312	RASSF7	NW_004973526.1:1035103-1051826
MSTRG.100022.1	NW_004973523.1 : 560978 - 573483	IRS2	NW_004973523.1:575781-580838
MSTRG.100022.3	NW_004973523.1 : 564274 - 573379	IRS2	NW_004973523.1:575781-580838
MSTRG.100022.6	NW_004973523.1 : 564284 - 573483	IRS2	NW_004973523.1:575781-580838
MSTRG.100022.7	NW_004973523.1 : 565529 - 573483	IRS2	NW_004973523.1:575781-580838
MSTRG.99904.20	NW_004973523.1 : 109805 - 118739	NAXD	NW_004973523.1:14798-65059
MSTRG.99190.1	NW_004973519.1 : 999244 - 1009672	TMEM163	NW_004973519.1:903505-991255
MSTRG.99126.8	NW_004973519.1 : 110367 - 115508	LOC102084234	NW_004973519.1:84327-99991
MSTRG.99152.22	NW_004973519.1 : 327015 - 1235968	LYPD1	NW_004973519.1:270466-288322
MSTRG.99155.1	NW_004973519.1 : 294071 - 296195	LYPD1	NW_004973519.1:270466-288322
MSTRG.99126.8	NW_004973519.1 : 110367 - 115508	SLC35F5	NW_004973519.1:129283-162203
MSTRG.99152.22	NW_004973519.1 : 327015 - 1235968	DARS	NW_004973519.1:1289727-1329292
MSTRG.99152.22	NW_004973519.1 : 327015 - 1235968	MCM6	NW_004973519.1:1272213-1286112
MSTRG.99152.22	NW_004973519.1 : 327015 - 1235968	LCT	NW_004973519.1:1252138-1270714
MSTRG.99152.22	NW_004973519.1 : 327015 - 1235968	UBXN4	NW_004973519.1:1242192-1251776
MSTRG.99190.1	NW_004973519.1 : 999244 - 1009672	RAB3GAP1	NW_004973519.1:1083881-1107191
MSTRG.99190.1	NW_004973519.1 : 999244 - 1009672	MAP3K19	NW_004973519.1:1063725-1083835
MSTRG.99190.1	NW_004973519.1 : 999244 - 1009672	CCNT2	NW_004973519.1:1041246-1064058
MSTRG.98418.1	NW_004973513.1 : 114775 - 137654	LOC102095407	NW_004973513.1:54272-107506
MSTRG.98418.1	NW_004973513.1 : 114775 - 137654	LOC102096265	NW_004973513.1:20606-50568
MSTRG.98418.1	NW_004973513.1 : 114775 - 137654	MFSD7	NW_004973513.1:164121-195108
MSTRG.98310.1	NW_004973510.1 : 1283933 - 1285963	SEC23B	NW_004973510.1:1330638-1354760
MSTRG.98310.1	NW_004973510.1 : 1283933 - 1285963	POLR3F	NW_004973510.1:1314136-1324758
MSTRG.98291.5	NW_004973510.1 : 1212516 - 1216181	DZANK1	NW_004973510.1:1287229-1313647
MSTRG.98310.1	NW_004973510.1 : 1283933 - 1285963	DZANK1	NW_004973510.1:1287229-1313647
MSTRG.98287.3	NW_004973510.1 : 1191815 - 1194662	BIRC5	NW_004973510.1:1282559-1283997
MSTRG.98291.5	NW_004973510.1 : 1212516 - 1216181	BIRC5	NW_004973510.1:1282559-1283997
MSTRG.98287.3	NW_004973510.1 : 1191815 - 1194662	KAT14	NW_004973510.1:1260221-1279408
MSTRG.98291.5	NW_004973510.1 : 1212516 - 1216181	KAT14	NW_004973510.1:1260221-1279408
MSTRG.98310.1	NW_004973510.1 : 1283933 - 1285963	KAT14	NW_004973510.1:1260221-1279408
MSTRG.98287.3	NW_004973510.1 : 1191815 - 1194662	OVOL2	NW_004973510.1:1231610-1248344
MSTRG.98291.5	NW_004973510.1 : 1212516 - 1216181	OVOL2	NW_004973510.1:1231610-1248344
MSTRG.98310.1	NW_004973510.1 : 1283933 - 1285963	OVOL2	NW_004973510.1:1231610-1248344
MSTRG.98287.3	NW_004973510.1 : 1191815 - 1194662	MGME1	NW_004973510.1:1217420-1227032
MSTRG.98291.5	NW_004973510.1 : 1212516 - 1216181	MGME1	NW_004973510.1:1217420-1227032
MSTRG.98310.1	NW_004973510.1 : 1283933 - 1285963	MGME1	NW_004973510.1:1217420-1227032
MSTRG.98287.3	NW_004973510.1 : 1191815 - 1194662	SNX5	NW_004973510.1:1199473-1217361
MSTRG.98310.1	NW_004973510.1 : 1283933 - 1285963	SNX5	NW_004973510.1:1199473-1217361
MSTRG.98287.3	NW_004973510.1 : 1191815 - 1194662	RRBP1	NW_004973510.1:1109911-1135723
MSTRG.98230.2	NW_004973510.1 : 1005211 - 1009587	DSTN	NW_004973510.1:1092230-1104155
MSTRG.98287.3	NW_004973510.1 : 1191815 - 1194662	DSTN	NW_004973510.1:1092230-1104155
MSTRG.98230.2	NW_004973510.1 : 1005211 - 1009587	LOC102090228	NW_004973510.1:1050310-1052722
MSTRG.97954.1	NW_004973507.1 : 1009600 - 1162694	LOC110363497	NW_004973507.1:951745-959473
MSTRG.97521.2	NW_004973502.1 : 70628 - 72645	DNAJB6	NW_004973502.1:4626-67987
MSTRG.97480.11	NW_004973498.1 : 377988 - 380805	MAP4K3	NW_004973498.1:442266-464775
MSTRG.97480.11	NW_004973498.1 : 377988 - 380805	SOS1	NW_004973498.1:387559-436286
MSTRG.97480.11	NW_004973498.1 : 377988 - 380805	MORN2	NW_004973498.1:336813-363636
MSTRG.97480.11	NW_004973498.1 : 377988 - 380805	DHX57	NW_004973498.1:317771-344170
MSTRG.97480.11	NW_004973498.1 : 377988 - 380805	LOC102096747	NW_004973498.1:307638-316094
MSTRG.97480.11	NW_004973498.1 : 377988 - 380805	GEMIN6	NW_004973498.1:303165-306645
MSTRG.97480.11	NW_004973498.1 : 377988 - 380805	LOC102096559	NW_004973498.1:294153-300553
MSTRG.97480.11	NW_004973498.1 : 377988 - 380805	GALM	NW_004973498.1:279753-299859
MSTRG.96454.3	NW_004973497.1 : 5537108 - 5641948	RAB4A	NW_004973497.1:5703004-5730700
MSTRG.96454.3	NW_004973497.1 : 5537108 - 5641948	CCSAP	NW_004973497.1:5687568-5702311
MSTRG.96454.3	NW_004973497.1 : 5537108 - 5641948	ACTA1	NW_004973497.1:5664784-5666875
MSTRG.95712.15	NW_004973492.1 : 52113 - 56298	GOLT1B	NW_004973492.1:73562-88588
MSTRG.95712.15	NW_004973492.1 : 52113 - 56298	PYROXD1	NW_004973492.1:32215-50657
MSTRG.95166.2	NW_004973489.1 : 1 - 3413	ACTR1A	NW_004973489.1:60911-77171
MSTRG.95166.2	NW_004973489.1 : 1 - 3413	MFSD13A	NW_004973489.1:46464-60597
MSTRG.95218.1	NW_004973489.1 : 245625 - 249758	AS3MT	NW_004973489.1:338632-342888
MSTRG.95218.1	NW_004973489.1 : 245625 - 249758	BORCS7	NW_004973489.1:333973-338105
MSTRG.95218.1	NW_004973489.1 : 245625 - 249758	LOC102093575	NW_004973489.1:330205-333665
MSTRG.95166.2	NW_004973489.1 : 1 - 3413	LOC110363299	NW_004973489.1:32115-44651
MSTRG.95218.1	NW_004973489.1 : 245625 - 249758	WBP1L	NW_004973489.1:288127-323937
MSTRG.95218.1	NW_004973489.1 : 245625 - 249758	ARL3	NW_004973489.1:222454-244624
MSTRG.95218.1	NW_004973489.1 : 245625 - 249758	TRIM8	NW_004973489.1:187925-216353
MSTRG.94558.3	NW_004973488.1 : 737725 - 787218	TMEM114	NW_004973488.1:680066-699791
MSTRG.94558.4	NW_004973488.1 : 739122 - 930277	TMEM114	NW_004973488.1:680066-699791
MSTRG.94558.6	NW_004973488.1 : 739689 - 772461	TMEM114	NW_004973488.1:680066-699791
MSTRG.94558.3	NW_004973488.1 : 737725 - 787218	METTL22	NW_004973488.1:661722-669959
MSTRG.94558.4	NW_004973488.1 : 739122 - 930277	METTL22	NW_004973488.1:661722-669959
MSTRG.94558.6	NW_004973488.1 : 739689 - 772461	METTL22	NW_004973488.1:661722-669959
MSTRG.94981.1	NW_004973488.1 : 4169949 - 4177516	CUNH16orf45	NW_004973488.1:4237019-4262780
MSTRG.94981.1	NW_004973488.1 : 4169949 - 4177516	LOC102084789	NW_004973488.1:4198189-4210387
MSTRG.94981.1	NW_004973488.1 : 4169949 - 4177516	SNN	NW_004973488.1:4189621-4196503
MSTRG.94981.1	NW_004973488.1 : 4169949 - 4177516	LOC102092663	NW_004973488.1:4104875-4140039
MSTRG.94794.1	NW_004973488.1 : 2736759 - 2737844	RHBDF1	NW_004973488.1:2763535-2801731
MSTRG.94794.1	NW_004973488.1 : 2736759 - 2737844	SNRNP25	NW_004973488.1:2759943-2763403
MSTRG.94794.1	NW_004973488.1 : 2736759 - 2737844	KIAA0556	NW_004973488.1:2659970-2715006
MSTRG.94204.3	NW_004973486.1 : 700747 - 702263	NOTUM	NW_004973486.1:790486-797876
MSTRG.94204.3	NW_004973486.1 : 700747 - 702263	MYADML2	NW_004973486.1:786302-787266
MSTRG.94204.3	NW_004973486.1 : 700747 - 702263	PYCR1	NW_004973486.1:779725-782973
MSTRG.94204.3	NW_004973486.1 : 700747 - 702263	MAFG	NW_004973486.1:773797-775577
MSTRG.94204.3	NW_004973486.1 : 700747 - 702263	SIRT7	NW_004973486.1:767952-770654
MSTRG.94204.3	NW_004973486.1 : 700747 - 702263	PCYT2	NW_004973486.1:758609-766931
MSTRG.94204.3	NW_004973486.1 : 700747 - 702263	ANAPC11	NW_004973486.1:752634-757585
MSTRG.94204.3	NW_004973486.1 : 700747 - 702263	ALYREF	NW_004973486.1:747465-751491
MSTRG.94204.3	NW_004973486.1 : 700747 - 702263	ARHGDIA	NW_004973486.1:745192-747159
MSTRG.94204.3	NW_004973486.1 : 700747 - 702263	P4HB	NW_004973486.1:730113-741520
MSTRG.94204.3	NW_004973486.1 : 700747 - 702263	PPP1R27	NW_004973486.1:723929-727350
MSTRG.94204.3	NW_004973486.1 : 700747 - 702263	GCGR	NW_004973486.1:716677-721840
MSTRG.94204.3	NW_004973486.1 : 700747 - 702263	SLC25A10	NW_004973486.1:705062-709443
MSTRG.94204.3	NW_004973486.1 : 700747 - 702263	HGS	NW_004973486.1:692195-699531
MSTRG.94204.3	NW_004973486.1 : 700747 - 702263	ARL16	NW_004973486.1:690060-690733
MSTRG.94204.3	NW_004973486.1 : 700747 - 702263	TMC6	NW_004973486.1:683024-689255
MSTRG.94204.3	NW_004973486.1 : 700747 - 702263	SYNGR2	NW_004973486.1:680402-681368
MSTRG.94204.3	NW_004973486.1 : 700747 - 702263	TK1	NW_004973486.1:677481-678902
MSTRG.94204.3	NW_004973486.1 : 700747 - 702263	AFMID	NW_004973486.1:674169-675981
MSTRG.94204.3	NW_004973486.1 : 700747 - 702263	LOC106145842	NW_004973486.1:670186-673094
MSTRG.94204.3	NW_004973486.1 : 700747 - 702263	SOCS3	NW_004973486.1:650715-652145
MSTRG.94204.3	NW_004973486.1 : 700747 - 702263	PGS1	NW_004973486.1:629094-644357
MSTRG.93939.1	NW_004973485.1 : 2431992 - 2440818	CRADD	NW_004973485.1:2354020-2431815
MSTRG.93947.1	NW_004973485.1 : 2452238 - 2453283	CRADD	NW_004973485.1:2354020-2431815
MSTRG.93939.1	NW_004973485.1 : 2431992 - 2440818	SOCS2	NW_004973485.1:2340530-2342479
MSTRG.93386.4	NW_004973485.1 : 201899 - 205297	TMTC3	NW_004973485.1:172216-199414
MSTRG.93386.4	NW_004973485.1 : 201899 - 205297	CEP290	NW_004973485.1:113099-165060
MSTRG.93008.10	NW_004973484.1 : 455405 - 473952	SCN4A	NW_004973484.1:513181-557622
MSTRG.93008.10	NW_004973484.1 : 455405 - 473952	CD79B	NW_004973484.1:505624-510068
MSTRG.92989.44	NW_004973484.1 : 393712 - 396669	LOC102083987	NW_004973484.1:446672-465281
MSTRG.92989.44	NW_004973484.1 : 393712 - 396669	LOC102083804	NW_004973484.1:434149-446020
MSTRG.93008.10	NW_004973484.1 : 455405 - 473952	LOC102083804	NW_004973484.1:434149-446020
MSTRG.92989.44	NW_004973484.1 : 393712 - 396669	TMEM98	NW_004973484.1:428947-431339
MSTRG.93008.10	NW_004973484.1 : 455405 - 473952	TMEM98	NW_004973484.1:428947-431339
MSTRG.92989.44	NW_004973484.1 : 393712 - 396669	GRN	NW_004973484.1:414495-423117
MSTRG.93008.10	NW_004973484.1 : 455405 - 473952	GRN	NW_004973484.1:414495-423117
MSTRG.92989.44	NW_004973484.1 : 393712 - 396669	LOC102098907	NW_004973484.1:413360-414325
MSTRG.93008.10	NW_004973484.1 : 455405 - 473952	LOC102098907	NW_004973484.1:413360-414325
MSTRG.92989.44	NW_004973484.1 : 393712 - 396669	ITGA2B	NW_004973484.1:404663-407998
MSTRG.93008.10	NW_004973484.1 : 455405 - 473952	ITGA2B	NW_004973484.1:404663-407998
MSTRG.93008.10	NW_004973484.1 : 455405 - 473952	GPATCH8	NW_004973484.1:361575-395204
MSTRG.92989.44	NW_004973484.1 : 393712 - 396669	FZD2	NW_004973484.1:333145-335053
MSTRG.92989.44	NW_004973484.1 : 393712 - 396669	PSMD11	NW_004973484.1:301892-319572
MSTRG.92989.44	NW_004973484.1 : 393712 - 396669	CDK5R1	NW_004973484.1:297490-300336
MSTRG.93263.4	NW_004973484.1 : 1923039 - 1926132	ARHGAP23	NW_004973484.1:1998219-2021751
MSTRG.93263.4	NW_004973484.1 : 1923039 - 1926132	SOCS7	NW_004973484.1:1982165-1994161
MSTRG.93263.4	NW_004973484.1 : 1923039 - 1926132	GPR179	NW_004973484.1:1967109-1977383
MSTRG.93263.4	NW_004973484.1 : 1923039 - 1926132	MRPL45	NW_004973484.1:1962276-1966113
MSTRG.93263.4	NW_004973484.1 : 1923039 - 1926132	NPEPPS	NW_004973484.1:1926417-1956461
MSTRG.93263.4	NW_004973484.1 : 1923039 - 1926132	KPNB1	NW_004973484.1:1900392-1919358
MSTRG.93263.4	NW_004973484.1 : 1923039 - 1926132	TBKBP1	NW_004973484.1:1885691-1892331
MSTRG.93263.4	NW_004973484.1 : 1923039 - 1926132	TBX21	NW_004973484.1:1867238-1870331
MSTRG.93263.4	NW_004973484.1 : 1923039 - 1926132	OSBPL7	NW_004973484.1:1859190-1865262
MSTRG.93263.4	NW_004973484.1 : 1923039 - 1926132	MRPL10	NW_004973484.1:1856449-1857567
MSTRG.93263.4	NW_004973484.1 : 1923039 - 1926132	LRRC46	NW_004973484.1:1853475-1855497
MSTRG.93263.4	NW_004973484.1 : 1923039 - 1926132	SCRN2	NW_004973484.1:1850994-1853232
MSTRG.93263.4	NW_004973484.1 : 1923039 - 1926132	SP2	NW_004973484.1:1827187-1834159
MSTRG.93263.4	NW_004973484.1 : 1923039 - 1926132	PNPO	NW_004973484.1:1823869-1826024
MSTRG.92172.1	NW_004973477.1 : 283085 - 285230	ADAM11	NW_004973477.1:340803-355812
MSTRG.92172.1	NW_004973477.1 : 283085 - 285230	DBF4B	NW_004973477.1:322253-335999
MSTRG.92172.1	NW_004973477.1 : 283085 - 285230	CCDC43	NW_004973477.1:313844-319260
MSTRG.92172.1	NW_004973477.1 : 283085 - 285230	MEIOC	NW_004973477.1:298430-311620
MSTRG.92172.1	NW_004973477.1 : 283085 - 285230	NSF	NW_004973477.1:202976-273063
MSTRG.92172.1	NW_004973477.1 : 283085 - 285230	WNT3	NW_004973477.1:185102-198377
MSTRG.91046.28	NW_004973468.1 : 207300 - 232504	KPNA2	NW_004973468.1:245912-250660
MSTRG.91046.30	NW_004973468.1 : 207300 - 232536	KPNA2	NW_004973468.1:245912-250660
MSTRG.91046.28	NW_004973468.1 : 207300 - 232504	SMURF2	NW_004973468.1:178892-205865
MSTRG.91046.30	NW_004973468.1 : 207300 - 232536	SMURF2	NW_004973468.1:178892-205865
MSTRG.91046.28	NW_004973468.1 : 207300 - 232504	CEP95	NW_004973468.1:160227-176476
MSTRG.91046.30	NW_004973468.1 : 207300 - 232536	CEP95	NW_004973468.1:160227-176476
MSTRG.91046.28	NW_004973468.1 : 207300 - 232504	DDX5	NW_004973468.1:150009-155578
MSTRG.91046.30	NW_004973468.1 : 207300 - 232536	DDX5	NW_004973468.1:150009-155578
MSTRG.91046.28	NW_004973468.1 : 207300 - 232504	POLG2	NW_004973468.1:142799-146712
MSTRG.91046.30	NW_004973468.1 : 207300 - 232536	POLG2	NW_004973468.1:142799-146712
MSTRG.91046.28	NW_004973468.1 : 207300 - 232504	MILR1	NW_004973468.1:136774-139239
MSTRG.91046.30	NW_004973468.1 : 207300 - 232536	MILR1	NW_004973468.1:136774-139239
MSTRG.90820.10	NW_004973467.1 : 335109 - 337485	MINOS1	NW_004973467.1:394688-409438
MSTRG.90820.10	NW_004973467.1 : 335109 - 337485	LOC102094788	NW_004973467.1:362716-374493
MSTRG.90820.10	NW_004973467.1 : 335109 - 337485	HTR6	NW_004973467.1:337608-369280
MSTRG.90820.10	NW_004973467.1 : 335109 - 337485	OTUD3	NW_004973467.1:311319-329823
MSTRG.90820.10	NW_004973467.1 : 335109 - 337485	LOC102094603	NW_004973467.1:304070-306968
MSTRG.90820.10	NW_004973467.1 : 335109 - 337485	LOC102089315	NW_004973467.1:299305-302763
MSTRG.90820.10	NW_004973467.1 : 335109 - 337485	UBXN10	NW_004973467.1:293530-310546
MSTRG.90820.10	NW_004973467.1 : 335109 - 337485	LOC102089127	NW_004973467.1:282606-292750
MSTRG.90820.10	NW_004973467.1 : 335109 - 337485	VWA5B1	NW_004973467.1:248807-276675
MSTRG.89989.63	NW_004973462.1 : 382459 - 430624	LOC102094915	NW_004973462.1:494838-501273
MSTRG.89989.63	NW_004973462.1 : 382459 - 430624	LARP4	NW_004973462.1:459566-476285
MSTRG.89989.63	NW_004973462.1 : 382459 - 430624	ATF1	NW_004973462.1:368035-379571
MSTRG.89989.63	NW_004973462.1 : 382459 - 430624	TMPRSS12	NW_004973462.1:360275-365550
MSTRG.89989.63	NW_004973462.1 : 382459 - 430624	METTL7A	NW_004973462.1:356006-359200
MSTRG.89989.63	NW_004973462.1 : 382459 - 430624	SCN8A	NW_004973462.1:295083-340520
MSTRG.89858.43	NW_004973460.1 : 1063272 - 1086355	CUNH4orf45	NW_004973460.1:987424-1031588
MSTRG.89544.57	NW_004973458.1 : 606611 - 609168	PLBD1	NW_004973458.1:507209-539482
MSTRG.88818.1	NW_004973454.1 : 143665 - 145910	LOC102093448	NW_004973454.1:121437-124895
MSTRG.88755.2	NW_004973453.1 : 935790 - 1010619	NUDT2	NW_004973453.1:1091937-1096861
MSTRG.88755.2	NW_004973453.1 : 935790 - 1010619	LOC102090224	NW_004973453.1:1072513-1090359
MSTRG.88755.2	NW_004973453.1 : 935790 - 1010619	LOC102090055	NW_004973453.1:1060555-1095374
MSTRG.88755.2	NW_004973453.1 : 935790 - 1010619	KIAA1161	NW_004973453.1:1047512-1054685
MSTRG.88755.2	NW_004973453.1 : 935790 - 1010619	CUNH9orf24	NW_004973453.1:1039323-1043850
MSTRG.87297.1	NW_004973450.1 : 477488 - 483237	SOD2	NW_004973450.1:459567-465925
MSTRG.87297.1	NW_004973450.1 : 477488 - 483237	WTAP	NW_004973450.1:428239-454499
MSTRG.87297.1	NW_004973450.1 : 477488 - 483237	ACAT2	NW_004973450.1:411622-419437
MSTRG.87297.1	NW_004973450.1 : 477488 - 483237	TCP1	NW_004973450.1:404105-411468
MSTRG.87297.1	NW_004973450.1 : 477488 - 483237	MRPL18	NW_004973450.1:399306-401610
MSTRG.87297.1	NW_004973450.1 : 477488 - 483237	PNLDC1	NW_004973450.1:387649-399012
MSTRG.86190.2	NW_004973446.1 : 23935 - 35862	GATA2	NW_004973446.1:90568-101420
MSTRG.86190.3	NW_004973446.1 : 31705 - 34493	GATA2	NW_004973446.1:90568-101420
MSTRG.86315.2	NW_004973446.1 : 567621 - 584494	TPRA1	NW_004973446.1:670681-683465
MSTRG.86315.2	NW_004973446.1 : 567621 - 584494	MCM2	NW_004973446.1:654027-667727
MSTRG.86315.2	NW_004973446.1 : 567621 - 584494	PODXL2	NW_004973446.1:612072-643457
MSTRG.86315.2	NW_004973446.1 : 567621 - 584494	ABTB1	NW_004973446.1:585515-609402
MSTRG.86190.2	NW_004973446.1 : 23935 - 35862	LOC110362683	NW_004973446.1:53809-63725
MSTRG.86190.3	NW_004973446.1 : 31705 - 34493	LOC110362683	NW_004973446.1:53809-63725
MSTRG.86315.2	NW_004973446.1 : 567621 - 584494	KBTBD12	NW_004973446.1:470877-510427
MSTRG.86190.2	NW_004973446.1 : 23935 - 35862	RAB7A	NW_004973446.1:3889-23382
MSTRG.86190.3	NW_004973446.1 : 31705 - 34493	RAB7A	NW_004973446.1:3889-23382
MSTRG.86282.1	NW_004973446.1 : 307862 - 309960	LOC110362657	NW_004973446.1:260016-284299
MSTRG.86701.2	NW_004973446.1 : 2432737 - 2445321	MTMR14	NW_004973446.1:2511203-2540377
MSTRG.86701.2	NW_004973446.1 : 2432737 - 2445321	LHFPL4	NW_004973446.1:2496725-2506214
MSTRG.86701.2	NW_004973446.1 : 2432737 - 2445321	SETD5	NW_004973446.1:2454136-2492452
MSTRG.86701.2	NW_004973446.1 : 2432737 - 2445321	LOC106145806	NW_004973446.1:2415433-2424947
MSTRG.86701.2	NW_004973446.1 : 2432737 - 2445321	PLXNB1	NW_004973446.1:2366345-2407534
MSTRG.86579.12	NW_004973446.1 : 1874505 - 1890263	LSM3	NW_004973446.1:1797930-1801625
MSTRG.86579.12	NW_004973446.1 : 1874505 - 1890263	XPC	NW_004973446.1:1784262-1796126
MSTRG.85428.1	NW_004973439.1 : 3438706 - 3445820	HSF2	NW_004973439.1:3395431-3410248
MSTRG.85428.1	NW_004973439.1 : 3438706 - 3445820	SERINC1	NW_004973439.1:3383242-3393400
MSTRG.85382.1	NW_004973439.1 : 3007208 - 3013480	LOC110362585	NW_004973439.1:3027540-3091073
MSTRG.85203.1	NW_004973439.1 : 1662067 - 1668798	HINT3	NW_004973439.1:1726773-1731856
MSTRG.85203.1	NW_004973439.1 : 1662067 - 1668798	TRMT11	NW_004973439.1:1689293-1717142
MSTRG.84605.40	NW_004973436.1 : 162082 - 216621	PGAP2	NW_004973436.1:99082-121697
MSTRG.84705.1	NW_004973436.1 : 571970 - 573296	RPS11	NW_004973436.1:573341-575005
MSTRG.84705.1	NW_004973436.1 : 571970 - 573296	LOC102094486	NW_004973436.1:515330-516491
MSTRG.84705.1	NW_004973436.1 : 571970 - 573296	LOC102094311	NW_004973436.1:492966-494735
MSTRG.84605.40	NW_004973436.1 : 162082 - 216621	LOC102089504	NW_004973436.1:298088-299259
MSTRG.84605.40	NW_004973436.1 : 162082 - 216621	RRM1	NW_004973436.1:258247-278425
MSTRG.84605.40	NW_004973436.1 : 162082 - 216621	LOC102092298	NW_004973436.1:231391-251311
MSTRG.84605.40	NW_004973436.1 : 162082 - 216621	RHOG	NW_004973436.1:122202-127306
MSTRG.84442.19	NW_004973434.1 : 38502 - 58250	SRP9	NW_004973434.1:96583-102391
MSTRG.84442.26	NW_004973434.1 : 41608 - 58232	SRP9	NW_004973434.1:96583-102391
MSTRG.84540.2	NW_004973434.1 : 652600 - 657715	COQ8A	NW_004973434.1:673146-707895
MSTRG.84540.2	NW_004973434.1 : 652600 - 657715	PSEN2	NW_004973434.1:633796-647502
MSTRG.84442.19	NW_004973434.1 : 38502 - 58250	EPHX1	NW_004973434.1:110545-133518
MSTRG.84442.26	NW_004973434.1 : 41608 - 58232	EPHX1	NW_004973434.1:110545-133518
MSTRG.84232.9	NW_004973431.1 : 570068 - 571207	XPO1	NW_004973431.1:533246-565682
MSTRG.84049.1	NW_004973431.1 : 167146 - 168155	BMP2	NW_004973431.1:231594-235228
MSTRG.83678.1	NW_004973428.1 : 7264113 - 7266294	WASHC5	NW_004973428.1:7191586-7218663
MSTRG.83488.1	NW_004973428.1 : 5373786 - 5375495	SNTB1	NW_004973428.1:5315279-5373414
MSTRG.83488.1	NW_004973428.1 : 5373786 - 5375495	MTBP	NW_004973428.1:5279028-5309801
MSTRG.83462.1	NW_004973428.1 : 4810403 - 4812255	ENPP2	NW_004973428.1:4835511-4904536
MSTRG.83462.1	NW_004973428.1 : 4810403 - 4812255	NOV	NW_004973428.1:4791248-4796632
MSTRG.83462.1	NW_004973428.1 : 4810403 - 4812255	MAL2	NW_004973428.1:4725628-4737962
MSTRG.82817.1	NW_004973426.1 : 632557 - 634374	BLK	NW_004973426.1:656852-706656
MSTRG.82817.1	NW_004973426.1 : 632557 - 634374	LOC102092479	NW_004973426.1:578306-590566
MSTRG.82779.33	NW_004973426.1 : 355153 - 431147	LOC110362392	NW_004973426.1:491746-493205
MSTRG.82377.1	NW_004973424.1 : 1831594 - 1832049	SLC1A1	NW_004973424.1:1842521-1885466
MSTRG.82043.2	NW_004973423.1 : 151970 - 155195	TMEM110	NW_004973423.1:70679-87332
MSTRG.82043.2	NW_004973423.1 : 151970 - 155195	MUSTN1	NW_004973423.1:60801-65228
MSTRG.81672.2	NW_004973422.1 : 1387414 - 1389553	CLEC3A	NW_004973422.1:1297971-1305146
MSTRG.81053.8	NW_004973421.1 : 710791 - 712737	KRAS	NW_004973421.1:715086-736936
MSTRG.81053.8	NW_004973421.1 : 710791 - 712737	ETFRF1	NW_004973421.1:708462-710218
MSTRG.81053.8	NW_004973421.1 : 710791 - 712737	CASC1	NW_004973421.1:683452-707798
MSTRG.81053.8	NW_004973421.1 : 710791 - 712737	LRMP	NW_004973421.1:641311-683524
MSTRG.81317.4	NW_004973421.1 : 2226079 - 2229641	TTLL12	NW_004973421.1:2251123-2278908
MSTRG.81317.4	NW_004973421.1 : 2226079 - 2229641	TSPO	NW_004973421.1:2244486-2249362
MSTRG.81317.4	NW_004973421.1 : 2226079 - 2229641	MCAT	NW_004973421.1:2234578-2242434
MSTRG.81317.4	NW_004973421.1 : 2226079 - 2229641	TTLL1	NW_004973421.1:2188715-2204763
MSTRG.80578.5	NW_004973420.1 : 923956 - 927444	ZNF518A	NW_004973420.1:972151-981375
MSTRG.80578.5	NW_004973420.1 : 923956 - 927444	LOC106145790	NW_004973420.1:886752-903961
MSTRG.80578.5	NW_004973420.1 : 923956 - 927444	LOC102093679	NW_004973420.1:882973-887203
MSTRG.80578.5	NW_004973420.1 : 923956 - 927444	BTAF1	NW_004973420.1:826199-879570
MSTRG.80486.31	NW_004973420.1 : 466015 - 479937	KIF11	NW_004973420.1:562107-578847
MSTRG.80486.31	NW_004973420.1 : 466015 - 479937	HHEX	NW_004973420.1:531033-535980
MSTRG.80486.31	NW_004973420.1 : 466015 - 479937	LOC102086918	NW_004973420.1:379408-387433
MSTRG.80486.31	NW_004973420.1 : 466015 - 479937	LOC102092845	NW_004973420.1:373114-376417
MSTRG.80324.1	NW_004973418.1 : 641841 - 660519	PPM1B	NW_004973418.1:723827-756260
MSTRG.80324.1	NW_004973418.1 : 641841 - 660519	SLC3A1	NW_004973418.1:695423-713257
MSTRG.80324.1	NW_004973418.1 : 641841 - 660519	PREPL	NW_004973418.1:674176-694010
MSTRG.77850.13	NW_004973413.1 : 5110957 - 5135647	OGFRL1	NW_004973413.1:5158879-5174023
MSTRG.77850.9	NW_004973413.1 : 5093007 - 5148022	OGFRL1	NW_004973413.1:5158879-5174023
MSTRG.77850.13	NW_004973413.1 : 5110957 - 5135647	ASRGL1	NW_004973413.1:5054157-5075354
MSTRG.77850.9	NW_004973413.1 : 5093007 - 5148022	ASRGL1	NW_004973413.1:5054157-5075354
MSTRG.79306.1	NW_004973413.1 : 20090582 - 20196928	RRM2	NW_004973413.1:20266400-20271921
MSTRG.79306.1	NW_004973413.1 : 20090582 - 20196928	KLF11	NW_004973413.1:20203563-20217766
MSTRG.76805.11	NW_004973411.1 : 597638 - 607619	PRPF4B	NW_004973411.1:571482-596734
MSTRG.76805.11	NW_004973411.1 : 597638 - 607619	ECI2	NW_004973411.1:515624-558279
MSTRG.77098.1	NW_004973411.1 : 2335544 - 2338162	SERPINB1	NW_004973411.1:2398966-2400694
MSTRG.77098.1	NW_004973411.1 : 2335544 - 2338162	WRNIP1	NW_004973411.1:2361521-2389393
MSTRG.77098.1	NW_004973411.1 : 2335544 - 2338162	LOC110361904	NW_004973411.1:2355314-2371622
MSTRG.77098.1	NW_004973411.1 : 2335544 - 2338162	MYLK4	NW_004973411.1:2282257-2316095
MSTRG.76292.11	NW_004973408.1 : 149847 - 154088	LOC110361849	NW_004973408.1:136662-149715
MSTRG.76299.1	NW_004973408.1 : 109948 - 111230	LOC110361849	NW_004973408.1:136662-149715
MSTRG.74128.5	NW_004973399.1 : 278708 - 283303	ADHFE1	NW_004973399.1:361827-381466
MSTRG.74128.5	NW_004973399.1 : 278708 - 283303	CUNH8orf46	NW_004973399.1:327870-353584
MSTRG.74128.5	NW_004973399.1 : 278708 - 283303	MYBL1	NW_004973399.1:288243-312276
MSTRG.74128.5	NW_004973399.1 : 278708 - 283303	VCPIP1	NW_004973399.1:258354-276652
MSTRG.74128.5	NW_004973399.1 : 278708 - 283303	LOC102086726	NW_004973399.1:182774-208544
MSTRG.73954.1	NW_004973397.1 : 2429168 - 2445030	LOC110361619	NW_004973397.1:2468582-2494609
MSTRG.73954.1	NW_004973397.1 : 2429168 - 2445030	ADAM33	NW_004973397.1:2379310-2409018
MSTRG.73351.1	NW_004973393.1 : 478203 - 485325	DACT1	NW_004973393.1:543921-556311
MSTRG.73351.1	NW_004973393.1 : 478203 - 485325	TIMM9	NW_004973393.1:413657-421600
MSTRG.73351.1	NW_004973393.1 : 478203 - 485325	LOC102094966	NW_004973393.1:407553-412705
MSTRG.73505.4	NW_004973393.1 : 3100455 - 3101758	PPP1R36	NW_004973393.1:3137848-3164527
MSTRG.73505.4	NW_004973393.1 : 3100455 - 3101758	HSPA2	NW_004973393.1:3135442-3137767
MSTRG.73505.4	NW_004973393.1 : 3100455 - 3101758	ZBTB1	NW_004973393.1:3103380-3129037
MSTRG.73505.4	NW_004973393.1 : 3100455 - 3101758	AKAP5	NW_004973393.1:3083176-3088048
MSTRG.73505.4	NW_004973393.1 : 3100455 - 3101758	MTHFD1	NW_004973393.1:3033691-3077905
MSTRG.73320.4	NW_004973393.1 : 198027 - 200080	FRMD6	NW_004973393.1:235173-246331
MSTRG.73322.1	NW_004973393.1 : 190499 - 193213	FRMD6	NW_004973393.1:235173-246331
MSTRG.73320.4	NW_004973393.1 : 198027 - 200080	GNG2	NW_004973393.1:203052-229113
MSTRG.73322.1	NW_004973393.1 : 190499 - 193213	GNG2	NW_004973393.1:203052-229113
MSTRG.73320.4	NW_004973393.1 : 198027 - 200080	CUNH14orf166	NW_004973393.1:186865-197796
MSTRG.73320.4	NW_004973393.1 : 198027 - 200080	NID2	NW_004973393.1:171584-186648
MSTRG.73322.1	NW_004973393.1 : 190499 - 193213	NID2	NW_004973393.1:171584-186648
MSTRG.73320.4	NW_004973393.1 : 198027 - 200080	PTGDR	NW_004973393.1:154273-158397
MSTRG.73322.1	NW_004973393.1 : 190499 - 193213	PTGDR	NW_004973393.1:154273-158397
MSTRG.73320.4	NW_004973393.1 : 198027 - 200080	PTGER2	NW_004973393.1:144530-147625
MSTRG.73322.1	NW_004973393.1 : 190499 - 193213	PTGER2	NW_004973393.1:144530-147625
MSTRG.72835.1	NW_004973390.1 : 763167 - 765744	HAO2	NW_004973390.1:852475-862441
MSTRG.73100.1	NW_004973390.1 : 1958756 - 1969712	ZYX	NW_004973390.1:2021211-2050117
MSTRG.73100.1	NW_004973390.1 : 1958756 - 1969712	PEX5	NW_004973390.1:1938510-1949761
MSTRG.73100.1	NW_004973390.1 : 1958756 - 1969712	LOC102093857	NW_004973390.1:1924005-1933006
MSTRG.73100.1	NW_004973390.1 : 1958756 - 1969712	CLSTN3	NW_004973390.1:1911368-1923947
MSTRG.73100.1	NW_004973390.1 : 1958756 - 1969712	RBP5	NW_004973390.1:1906399-1908201
MSTRG.73100.1	NW_004973390.1 : 1958756 - 1969712	C1R	NW_004973390.1:1894739-1901478
MSTRG.73100.1	NW_004973390.1 : 1958756 - 1969712	C1S	NW_004973390.1:1872083-1891575
MSTRG.71929.1	NW_004973388.1 : 5404 - 9680	CUNH18orf21	NW_004973388.1:17489-24022
MSTRG.71565.1	NW_004973385.1 : 9065886 - 9068491	PSMC1	NW_004973385.1:9109794-9117953
MSTRG.71565.1	NW_004973385.1 : 9065886 - 9068491	NRDE2	NW_004973385.1:9075108-9107139
MSTRG.71565.1	NW_004973385.1 : 9065886 - 9068491	LOC102096800	NW_004973385.1:9024005-9030347
MSTRG.71293.1	NW_004973385.1 : 7196972 - 7200909	ASB2	NW_004973385.1:7241763-7280006
MSTRG.71293.1	NW_004973385.1 : 7196972 - 7200909	PPP4R4	NW_004973385.1:7107716-7175830
MSTRG.70635.2	NW_004973385.1 : 2858175 - 2864136	DIO3	NW_004973385.1:2942116-2943454
MSTRG.70635.2	NW_004973385.1 : 2858175 - 2864136	PPP2R5C	NW_004973385.1:2800641-2854691
MSTRG.70093.13	NW_004973384.1 : 1459036 - 1468203	LARP1B	NW_004973384.1:1424464-1451383
MSTRG.70093.13	NW_004973384.1 : 1459036 - 1468203	ABHD18	NW_004973384.1:1387587-1412632
MSTRG.70093.13	NW_004973384.1 : 1459036 - 1468203	MFSD8	NW_004973384.1:1374672-1387175
MSTRG.67879.7	NW_004973375.1 : 753242 - 762876	PID1	NW_004973375.1:792936-846114
MSTRG.68019.2	NW_004973375.1 : 1637666 - 1640615	CHST2	NW_004973375.1:1705225-1707879
MSTRG.68019.2	NW_004973375.1 : 1637666 - 1640615	U2SURP	NW_004973375.1:1653869-1693966
MSTRG.68019.2	NW_004973375.1 : 1637666 - 1640615	PCOLCE2	NW_004973375.1:1583459-1606677
MSTRG.68019.2	NW_004973375.1 : 1637666 - 1640615	TRPC1	NW_004973375.1:1558724-1580231
MSTRG.67440.14	NW_004973372.1 : 960415 - 964900	CUNH2orf40	NW_004973372.1:876889-882840
MSTRG.67001.10	NW_004973370.1 : 954694 - 958711	ACADSB	NW_004973370.1:967790-977134
MSTRG.67001.10	NW_004973370.1 : 954694 - 958711	PSTK	NW_004973370.1:944940-949184
MSTRG.67001.10	NW_004973370.1 : 954694 - 958711	LOC102096613	NW_004973370.1:923700-944133
MSTRG.67001.10	NW_004973370.1 : 954694 - 958711	CUNH10orf88	NW_004973370.1:916499-921563
MSTRG.66909.86	NW_004973370.1 : 596396 - 623937	LOC110361009	NW_004973370.1:664631-666982
MSTRG.66909.86	NW_004973370.1 : 596396 - 623937	NSMCE4A	NW_004973370.1:502743-515222
MSTRG.67054.2	NW_004973370.1 : 1410075 - 1491749	CPXM2	NW_004973370.1:1322452-1398530
MSTRG.67001.10	NW_004973370.1 : 954694 - 958711	BUB3	NW_004973370.1:1027197-1040409
MSTRG.67001.10	NW_004973370.1 : 954694 - 958711	LOC102097156	NW_004973370.1:1013038-1025826
MSTRG.65445.2	NW_004973364.1 : 58390 - 83882	SOCS5	NW_004973364.1:84468-88444
MSTRG.65455.1	NW_004973364.1 : 159490 - 163951	SOCS5	NW_004973364.1:84468-88444
MSTRG.65455.1	NW_004973364.1 : 159490 - 163951	MCFD2	NW_004973364.1:196712-200377
MSTRG.65153.3	NW_004973359.1 : 824247 - 827383	HAUS8	NW_004973359.1:887191-895157
MSTRG.65153.3	NW_004973359.1 : 824247 - 827383	MYO9B	NW_004973359.1:847120-886860
MSTRG.65153.3	NW_004973359.1 : 824247 - 827383	USE1	NW_004973359.1:842892-846302
MSTRG.65153.3	NW_004973359.1 : 824247 - 827383	ARHGEF18	NW_004973359.1:750297-792185
MSTRG.65153.3	NW_004973359.1 : 824247 - 827383	LOC102085446	NW_004973359.1:739522-741852
MSTRG.65153.3	NW_004973359.1 : 824247 - 827383	PEX11G	NW_004973359.1:734885-737734
MSTRG.65153.3	NW_004973359.1 : 824247 - 827383	TEX45	NW_004973359.1:730920-735122
MSTRG.64799.1	NW_004973357.1 : 818563 - 820177	F7	NW_004973357.1:782051-791865
MSTRG.64799.1	NW_004973357.1 : 818563 - 820177	F10	NW_004973357.1:767483-779779
MSTRG.64799.1	NW_004973357.1 : 818563 - 820177	LOC110360871	NW_004973357.1:758508-764240
MSTRG.64799.1	NW_004973357.1 : 818563 - 820177	PROZ	NW_004973357.1:734688-746291
MSTRG.64799.1	NW_004973357.1 : 818563 - 820177	PCID2	NW_004973357.1:720631-734093
MSTRG.64574.1	NW_004973355.1 : 16465 - 20823	GRIN2B	NW_004973355.1:3857-14668
MSTRG.64163.33	NW_004973352.1 : 101213 - 105818	AFTPH	NW_004973352.1:51428-98756
MSTRG.64163.33	NW_004973352.1 : 101213 - 105818	LOC110360834	NW_004973352.1:4784-15356
MSTRG.64163.33	NW_004973352.1 : 101213 - 105818	LGALSL	NW_004973352.1:21186-32056
MSTRG.64343.1	NW_004973352.1 : 1524217 - 1526150	ETAA1	NW_004973352.1:1429923-1438080
MSTRG.64163.33	NW_004973352.1 : 101213 - 105818	SERTAD2	NW_004973352.1:118723-200562
MSTRG.63423.16	NW_004973349.1 : 1585487 - 1594367	ZADH2	NW_004973349.1:1577094-1580848
MSTRG.63423.16	NW_004973349.1 : 1585487 - 1594367	TSHZ1	NW_004973349.1:1507684-1556955
MSTRG.63145.7	NW_004973348.1 : 175458 - 177297	CDS2	NW_004973348.1:79522-91090
MSTRG.63145.7	NW_004973348.1 : 175458 - 177297	DGUOK	NW_004973348.1:261807-265374
MSTRG.63145.7	NW_004973348.1 : 175458 - 177297	ACTG2	NW_004973348.1:257451-260697
MSTRG.63145.7	NW_004973348.1 : 175458 - 177297	STAMBP	NW_004973348.1:241045-254276
MSTRG.63145.7	NW_004973348.1 : 175458 - 177297	DUSP11	NW_004973348.1:231384-238430
MSTRG.63145.7	NW_004973348.1 : 175458 - 177297	PROM2	NW_004973348.1:222669-231463
MSTRG.63145.7	NW_004973348.1 : 175458 - 177297	PRNP	NW_004973348.1:206496-208428
MSTRG.63145.7	NW_004973348.1 : 175458 - 177297	RASSF2	NW_004973348.1:191852-199940
MSTRG.63145.7	NW_004973348.1 : 175458 - 177297	TMEM230	NW_004973348.1:107399-114333
MSTRG.63145.7	NW_004973348.1 : 175458 - 177297	PCNA	NW_004973348.1:101657-105162
MSTRG.62614.1	NW_004973345.1 : 8661 - 12759	SHOC2	NW_004973345.1:52283-91763
MSTRG.62628.5	NW_004973345.1 : 25199 - 36595	SHOC2	NW_004973345.1:52283-91763
MSTRG.62628.5	NW_004973345.1 : 25199 - 36595	PDCD4	NW_004973345.1:1513-12189
MSTRG.62628.5	NW_004973345.1 : 25199 - 36595	ADRA2A	NW_004973345.1:110056-113308
MSTRG.62573.57	NW_004973344.1 : 338363 - 343526	SAV1	NW_004973344.1:383579-400492
MSTRG.62573.57	NW_004973344.1 : 338363 - 343526	ATL1	NW_004973344.1:364432-382584
MSTRG.62573.57	NW_004973344.1 : 338363 - 343526	CDKL1	NW_004973344.1:263485-277323
MSTRG.62573.57	NW_004973344.1 : 338363 - 343526	ATP5S	NW_004973344.1:258942-262654
MSTRG.62573.57	NW_004973344.1 : 338363 - 343526	L2HGDH	NW_004973344.1:244028-258428
MSTRG.62144.8	NW_004973341.1 : 168397 - 179519	CCDC14	NW_004973341.1:114173-124238
MSTRG.61663.2	NW_004973338.1 : 897656 - 899118	PER2	NW_004973338.1:902723-945294
MSTRG.61663.2	NW_004973338.1 : 897656 - 899118	LOC102098412	NW_004973338.1:887149-888977
MSTRG.61663.2	NW_004973338.1 : 897656 - 899118	LOC102098595	NW_004973338.1:854611-857403
MSTRG.61663.2	NW_004973338.1 : 897656 - 899118	CAB39	NW_004973338.1:799665-840161
MSTRG.61113.1	NW_004973336.1 : 124289 - 143277	PUF60	NW_004973336.1:73732-97289
MSTRG.61113.1	NW_004973336.1 : 124289 - 143277	LOC110360542	NW_004973336.1:184545-187283
MSTRG.61113.1	NW_004973336.1 : 124289 - 143277	LOC110360539	NW_004973336.1:160262-164390
MSTRG.61113.1	NW_004973336.1 : 124289 - 143277	LOC110360540	NW_004973336.1:150330-153321
MSTRG.58534.1	NW_004973333.1 : 1353532 - 1358180	HEATR3	NW_004973333.1:1415696-1439765
MSTRG.58534.1	NW_004973333.1 : 1353532 - 1358180	CNEP1R1	NW_004973333.1:1412644-1417249
MSTRG.58156.9	NW_004973330.1 : 1502331 - 1527793	RFX8	NW_004973330.1:1572172-1610264
MSTRG.57798.1	NW_004973329.1 : 514971 - 518811	SLC15A1	NW_004973329.1:565744-610223
MSTRG.55390.1	NW_004973320.1 : 1569467 - 1570384	CALU	NW_004973320.1:1577644-1590323
MSTRG.55390.1	NW_004973320.1 : 1569467 - 1570384	IRF5	NW_004973320.1:1553669-1556598
MSTRG.55390.1	NW_004973320.1 : 1569467 - 1570384	TNPO3	NW_004973320.1:1524343-1547573
MSTRG.55390.1	NW_004973320.1 : 1569467 - 1570384	LOC106145736	NW_004973320.1:1513646-1514647
MSTRG.55390.1	NW_004973320.1 : 1569467 - 1570384	TSPAN33	NW_004973320.1:1502420-1506654
MSTRG.55390.1	NW_004973320.1 : 1569467 - 1570384	SMO	NW_004973320.1:1494178-1498428
MSTRG.55338.4	NW_004973320.1 : 1166587 - 1234407	NRF1	NW_004973320.1:1265837-1324233
MSTRG.55338.29	NW_004973320.1 : 1208573 - 1210752	UBE2H	NW_004973320.1:1226873-1250148
MSTRG.55330.1	NW_004973320.1 : 1108381 - 1118414	ZC3HC1	NW_004973320.1:1185648-1197259
MSTRG.55338.29	NW_004973320.1 : 1208573 - 1210752	ZC3HC1	NW_004973320.1:1185648-1197259
MSTRG.55330.1	NW_004973320.1 : 1108381 - 1118414	KLHDC10	NW_004973320.1:1158289-1168747
MSTRG.55338.29	NW_004973320.1 : 1208573 - 1210752	KLHDC10	NW_004973320.1:1158289-1168747
MSTRG.55330.1	NW_004973320.1 : 1108381 - 1118414	LOC102088800	NW_004973320.1:1150738-1156886
MSTRG.55338.29	NW_004973320.1 : 1208573 - 1210752	LOC102088800	NW_004973320.1:1150738-1156886
MSTRG.55338.4	NW_004973320.1 : 1166587 - 1234407	LOC102088800	NW_004973320.1:1150738-1156886
MSTRG.55330.1	NW_004973320.1 : 1108381 - 1118414	TMEM209	NW_004973320.1:1134525-1148337
MSTRG.55338.29	NW_004973320.1 : 1208573 - 1210752	TMEM209	NW_004973320.1:1134525-1148337
MSTRG.55338.4	NW_004973320.1 : 1166587 - 1234407	TMEM209	NW_004973320.1:1134525-1148337
MSTRG.55338.29	NW_004973320.1 : 1208573 - 1210752	LOC102098475	NW_004973320.1:1117585-1131473
MSTRG.55338.4	NW_004973320.1 : 1166587 - 1234407	LOC102098475	NW_004973320.1:1117585-1131473
MSTRG.55338.29	NW_004973320.1 : 1208573 - 1210752	LOC102098295	NW_004973320.1:1109247-1114627
MSTRG.55338.4	NW_004973320.1 : 1166587 - 1234407	LOC102098295	NW_004973320.1:1109247-1114627
MSTRG.55330.1	NW_004973320.1 : 1108381 - 1118414	LOC102098115	NW_004973320.1:1104203-1108091
MSTRG.55338.4	NW_004973320.1 : 1166587 - 1234407	LOC102098115	NW_004973320.1:1104203-1108091
MSTRG.55330.1	NW_004973320.1 : 1108381 - 1118414	CEP41	NW_004973320.1:1090661-1100538
MSTRG.55338.4	NW_004973320.1 : 1166587 - 1234407	CEP41	NW_004973320.1:1090661-1100538
MSTRG.55330.1	NW_004973320.1 : 1108381 - 1118414	MEST	NW_004973320.1:1080680-1088229
MSTRG.55338.4	NW_004973320.1 : 1166587 - 1234407	MEST	NW_004973320.1:1080680-1088229
MSTRG.55330.1	NW_004973320.1 : 1108381 - 1118414	COPG2	NW_004973320.1:1056566-1080779
MSTRG.55330.1	NW_004973320.1 : 1108381 - 1118414	IL15RA	NW_004973320.1:1034444-1037149
MSTRG.55188.1	NW_004973319.1 : 747537 - 750903	MRPL1	NW_004973319.1:821082-830148
MSTRG.55188.1	NW_004973319.1 : 747537 - 750903	CNOT6L	NW_004973319.1:794342-804957
MSTRG.55188.1	NW_004973319.1 : 747537 - 750903	LOC102092103	NW_004973319.1:787116-788203
MSTRG.55188.1	NW_004973319.1 : 747537 - 750903	CXCL13	NW_004973319.1:768689-786235
MSTRG.55188.1	NW_004973319.1 : 747537 - 750903	CCNG2	NW_004973319.1:751665-758476
MSTRG.55188.1	NW_004973319.1 : 747537 - 750903	CCNI	NW_004973319.1:709749-723169
MSTRG.55188.1	NW_004973319.1 : 747537 - 750903	SOWAHB	NW_004973319.1:650151-651621
MSTRG.54965.1	NW_004973318.1 : 424809 - 491077	NHSL2	NW_004973318.1:337969-355419
MSTRG.54965.1	NW_004973318.1 : 424809 - 491077	PIN4	NW_004973318.1:334562-336037
MSTRG.54965.1	NW_004973318.1 : 424809 - 491077	ERCC6L	NW_004973318.1:325515-331719
MSTRG.54859.11	NW_004973318.1 : 75481 - 94901	LOC102087092	NW_004973318.1:140073-140909
MSTRG.54859.11	NW_004973318.1 : 75481 - 94901	LOC110360036	NW_004973318.1:131852-133245
MSTRG.54859.11	NW_004973318.1 : 75481 - 94901	LOC102085798	NW_004973318.1:112681-114171
MSTRG.54655.11	NW_004973315.1 : 269847 - 302765	TFPI	NW_004973315.1:202658-262903
MSTRG.54358.1	NW_004973313.1 : 556816 - 558372	TMEM2	NW_004973313.1:501717-552627
MSTRG.54358.1	NW_004973313.1 : 556816 - 558372	ABHD17B	NW_004973313.1:466433-477961
MSTRG.53370.28	NW_004973310.1 : 208470 - 222470	TMEM260	NW_004973310.1:299120-322334
MSTRG.53379.1	NW_004973310.1 : 147775 - 225345	TMEM260	NW_004973310.1:299120-322334
MSTRG.53370.17	NW_004973310.1 : 152495 - 158782	PELI2	NW_004973310.1:164308-216107
MSTRG.52955.5	NW_004973309.1 : 832666 - 853660	ACAN	NW_004973309.1:887105-936769
MSTRG.52955.5	NW_004973309.1 : 832666 - 853660	HAPLN3	NW_004973309.1:880964-885392
MSTRG.52955.5	NW_004973309.1 : 832666 - 853660	MFGE8	NW_004973309.1:869806-877682
MSTRG.52955.5	NW_004973309.1 : 832666 - 853660	ABHD2	NW_004973309.1:813836-832593
MSTRG.52955.5	NW_004973309.1 : 832666 - 853660	RLBP1	NW_004973309.1:803655-811297
MSTRG.52955.5	NW_004973309.1 : 832666 - 853660	FANCI	NW_004973309.1:778440-803602
MSTRG.52955.5	NW_004973309.1 : 832666 - 853660	POLG	NW_004973309.1:767960-778930
MSTRG.53059.2	NW_004973309.1 : 1140798 - 1142246	MRPS11	NW_004973309.1:1041296-1044760
MSTRG.52706.62	NW_004973307.1 : 517664 - 536741	LOC102084286	NW_004973307.1:606601-633026
MSTRG.52178.8	NW_004973302.1 : 384791 - 400556	CREB1	NW_004973302.1:363383-383869
MSTRG.52178.8	NW_004973302.1 : 384791 - 400556	METTL21A	NW_004973302.1:351113-359797
MSTRG.52178.8	NW_004973302.1 : 384791 - 400556	CCNYL1	NW_004973302.1:314751-345380
MSTRG.52378.1	NW_004973302.1 : 2544663 - 2560211	BOLL	NW_004973302.1:2492273-2519556
MSTRG.52378.1	NW_004973302.1 : 2544663 - 2560211	RFTN2	NW_004973302.1:2466744-2490062
MSTRG.52378.1	NW_004973302.1 : 2544663 - 2560211	LOC102095262	NW_004973302.1:2450751-2466332
MSTRG.51694.19	NW_004973299.1 : 694304 - 697804	SPECC1L	NW_004973299.1:628692-684623
MSTRG.51694.19	NW_004973299.1 : 694304 - 697804	ADORA2A	NW_004973299.1:596417-608108
MSTRG.50206.6	NW_004973297.1 : 20616 - 23064	LOC102084097	NW_004973297.1:845-17719
MSTRG.51462.63	NW_004973297.1 : 7162041 - 7166531	LOC102083913	NW_004973297.1:7195855-7209724
MSTRG.51462.63	NW_004973297.1 : 7162041 - 7166531	PPP1CB	NW_004973297.1:7100735-7116691
MSTRG.50206.6	NW_004973297.1 : 20616 - 23064	PRKD3	NW_004973297.1:61316-108762
MSTRG.50206.6	NW_004973297.1 : 20616 - 23064	QPCT	NW_004973297.1:42472-54617
MSTRG.50629.1	NW_004973297.1 : 2818902 - 2820988	DLK2	NW_004973297.1:2886500-2894195
MSTRG.50629.1	NW_004973297.1 : 2818902 - 2820988	ABCC10	NW_004973297.1:2868035-2885825
MSTRG.50629.1	NW_004973297.1 : 2818902 - 2820988	ZNF318	NW_004973297.1:2828988-2856857
MSTRG.50629.1	NW_004973297.1 : 2818902 - 2820988	FAM98A	NW_004973297.1:2801124-2815299
MSTRG.50629.1	NW_004973297.1 : 2818902 - 2820988	RASGRP3	NW_004973297.1:2733778-2794714
MSTRG.50206.6	NW_004973297.1 : 20616 - 23064	NDUFAF7	NW_004973297.1:109410-115743
MSTRG.49989.1	NW_004973294.1 : 716695 - 722555	LOC110359694	NW_004973294.1:778136-790453
MSTRG.49959.35	NW_004973294.1 : 680260 - 684845	TMEM17	NW_004973294.1:755780-757463
MSTRG.49989.1	NW_004973294.1 : 716695 - 722555	TMEM17	NW_004973294.1:755780-757463
MSTRG.49713.4	NW_004973292.1 : 1579622 - 1602307	KLHL34	NW_004973292.1:1602538-1606030
MSTRG.49721.1	NW_004973292.1 : 1584995 - 1594029	KLHL34	NW_004973292.1:1602538-1606030
MSTRG.49721.1	NW_004973292.1 : 1584995 - 1594029	SMPX	NW_004973292.1:1544272-1584721
MSTRG.49713.4	NW_004973292.1 : 1579622 - 1602307	MBTPS2	NW_004973292.1:1495214-1527181
MSTRG.49721.1	NW_004973292.1 : 1584995 - 1594029	MBTPS2	NW_004973292.1:1495214-1527181
MSTRG.49526.1	NW_004973291.1 : 61628 - 62356	VPS45	NW_004973291.1:89103-103148
MSTRG.49526.1	NW_004973291.1 : 61628 - 62356	PLEKHO1	NW_004973291.1:72039-86800
MSTRG.49526.1	NW_004973291.1 : 61628 - 62356	ANP32E	NW_004973291.1:48924-56678
MSTRG.49533.1	NW_004973291.1 : 81148 - 95447	ANP32E	NW_004973291.1:48924-56678
MSTRG.49526.1	NW_004973291.1 : 61628 - 62356	APH1A	NW_004973291.1:36235-38461
MSTRG.49533.1	NW_004973291.1 : 81148 - 95447	APH1A	NW_004973291.1:36235-38461
MSTRG.49526.1	NW_004973291.1 : 61628 - 62356	RPRD2	NW_004973291.1:360-15770
MSTRG.49533.1	NW_004973291.1 : 81148 - 95447	RPRD2	NW_004973291.1:360-15770
MSTRG.49533.1	NW_004973291.1 : 81148 - 95447	TXNIP	NW_004973291.1:182708-186398
MSTRG.49533.1	NW_004973291.1 : 81148 - 95447	HFE2	NW_004973291.1:167473-173218
MSTRG.49526.1	NW_004973291.1 : 61628 - 62356	PRPF3	NW_004973291.1:15918-26735
MSTRG.49533.1	NW_004973291.1 : 81148 - 95447	PRPF3	NW_004973291.1:15918-26735
MSTRG.49526.1	NW_004973291.1 : 61628 - 62356	SV2A	NW_004973291.1:144481-161188
MSTRG.49533.1	NW_004973291.1 : 81148 - 95447	SV2A	NW_004973291.1:144481-161188
MSTRG.49526.1	NW_004973291.1 : 61628 - 62356	SF3B4	NW_004973291.1:135712-140632
MSTRG.49533.1	NW_004973291.1 : 81148 - 95447	SF3B4	NW_004973291.1:135712-140632
MSTRG.49526.1	NW_004973291.1 : 61628 - 62356	OTUD7B	NW_004973291.1:108120-126411
MSTRG.49533.1	NW_004973291.1 : 81148 - 95447	OTUD7B	NW_004973291.1:108120-126411
MSTRG.48190.1	NW_004973290.1 : 6834796 - 6848115	LOC110359512	NW_004973290.1:6817475-6830183
MSTRG.48190.1	NW_004973290.1 : 6834796 - 6848115	LOC102091124	NW_004973290.1:6777707-6816177
MSTRG.47127.2	NW_004973290.1 : 160921 - 448641	LOC110359644	NW_004973290.1:540527-544021
MSTRG.49260.7	NW_004973290.1 : 15651957 - 15653048	ECSCR	NW_004973290.1:15725717-15744763
MSTRG.49260.7	NW_004973290.1 : 15651957 - 15653048	PCDH12	NW_004973290.1:15700916-15718428
MSTRG.49260.7	NW_004973290.1 : 15651957 - 15653048	KIAA0141	NW_004973290.1:15680478-15703907
MSTRG.49162.2	NW_004973290.1 : 14584000 - 14586214	LOC102091615	NW_004973290.1:14618332-14652191
MSTRG.49138.1	NW_004973290.1 : 14426387 - 14427383	LOC102097754	NW_004973290.1:14489487-14498347
MSTRG.49162.2	NW_004973290.1 : 14584000 - 14586214	LOC102097754	NW_004973290.1:14489487-14498347
MSTRG.49138.1	NW_004973290.1 : 14426387 - 14427383	LOC102097580	NW_004973290.1:14479527-14483034
MSTRG.49138.1	NW_004973290.1 : 14426387 - 14427383	LOC102097395	NW_004973290.1:14469631-14474892
MSTRG.49138.1	NW_004973290.1 : 14426387 - 14427383	LOC102097214	NW_004973290.1:14463392-14467341
MSTRG.49138.1	NW_004973290.1 : 14426387 - 14427383	LOC102096854	NW_004973290.1:14454171-14463739
MSTRG.49138.1	NW_004973290.1 : 14426387 - 14427383	LOC102096674	NW_004973290.1:14431300-14440066
MSTRG.49138.1	NW_004973290.1 : 14426387 - 14427383	ZMAT2	NW_004973290.1:14416669-14425078
MSTRG.49138.1	NW_004973290.1 : 14426387 - 14427383	LOC102091308	NW_004973290.1:14410580-14415104
MSTRG.49138.1	NW_004973290.1 : 14426387 - 14427383	HARS	NW_004973290.1:14391666-14408673
MSTRG.49138.1	NW_004973290.1 : 14426387 - 14427383	DND1	NW_004973290.1:14388072-14390707
MSTRG.49097.2	NW_004973290.1 : 14278745 - 14285949	WDR55	NW_004973290.1:14382729-14385504
MSTRG.49138.1	NW_004973290.1 : 14426387 - 14427383	WDR55	NW_004973290.1:14382729-14385504
MSTRG.49097.2	NW_004973290.1 : 14278745 - 14285949	IK	NW_004973290.1:14373948-14382719
MSTRG.49138.1	NW_004973290.1 : 14426387 - 14427383	IK	NW_004973290.1:14373948-14382719
MSTRG.49097.2	NW_004973290.1 : 14278745 - 14285949	NDUFA2	NW_004973290.1:14371449-14373238
MSTRG.49138.1	NW_004973290.1 : 14426387 - 14427383	NDUFA2	NW_004973290.1:14371449-14373238
MSTRG.49097.2	NW_004973290.1 : 14278745 - 14285949	TMCO6	NW_004973290.1:14363236-14371526
MSTRG.49138.1	NW_004973290.1 : 14426387 - 14427383	TMCO6	NW_004973290.1:14363236-14371526
MSTRG.49097.2	NW_004973290.1 : 14278745 - 14285949	CD14	NW_004973290.1:14360603-14363964
MSTRG.49138.1	NW_004973290.1 : 14426387 - 14427383	CD14	NW_004973290.1:14360603-14363964
MSTRG.49097.2	NW_004973290.1 : 14278745 - 14285949	SLC35A4	NW_004973290.1:14357100-14358949
MSTRG.49138.1	NW_004973290.1 : 14426387 - 14427383	SLC35A4	NW_004973290.1:14357100-14358949
MSTRG.49097.2	NW_004973290.1 : 14278745 - 14285949	LOC110359571	NW_004973290.1:14354789-14357057
MSTRG.49138.1	NW_004973290.1 : 14426387 - 14427383	LOC110359571	NW_004973290.1:14354789-14357057
MSTRG.49097.2	NW_004973290.1 : 14278745 - 14285949	TMEM173	NW_004973290.1:14333747-14341832
MSTRG.49138.1	NW_004973290.1 : 14426387 - 14427383	TMEM173	NW_004973290.1:14333747-14341832
MSTRG.49074.1	NW_004973290.1 : 14149805 - 14241682	UBE2D2	NW_004973290.1:14296421-14311738
MSTRG.49097.2	NW_004973290.1 : 14278745 - 14285949	UBE2D2	NW_004973290.1:14296421-14311738
MSTRG.49097.2	NW_004973290.1 : 14278745 - 14285949	CXXC5	NW_004973290.1:14221101-14227408
MSTRG.47127.2	NW_004973290.1 : 160921 - 448641	CPEB4	NW_004973290.1:118029-158663
MSTRG.46447.1	NW_004973287.1 : 135925 - 141156	CUNH17orf64	NW_004973287.1:217829-224555
MSTRG.46424.46	NW_004973287.1 : 116057 - 118559	APPBP2	NW_004973287.1:191531-215517
MSTRG.46447.1	NW_004973287.1 : 135925 - 141156	APPBP2	NW_004973287.1:191531-215517
MSTRG.46739.1	NW_004973287.1 : 1815341 - 1818130	WSCD1	NW_004973287.1:1869918-1881903
MSTRG.46739.1	NW_004973287.1 : 1815341 - 1818130	RAP1GAP2	NW_004973287.1:1752966-1772692
MSTRG.46424.46	NW_004973287.1 : 116057 - 118559	PPM1D	NW_004973287.1:166172-191469
MSTRG.46447.1	NW_004973287.1 : 135925 - 141156	PPM1D	NW_004973287.1:166172-191469
MSTRG.46671.5	NW_004973287.1 : 1543473 - 1545737	MNT	NW_004973287.1:1604365-1620010
MSTRG.46671.5	NW_004973287.1 : 1543473 - 1545737	SGSM2	NW_004973287.1:1565687-1595708
MSTRG.46671.5	NW_004973287.1 : 1543473 - 1545737	TNFAIP1	NW_004973287.1:1548624-1557861
MSTRG.46671.5	NW_004973287.1 : 1543473 - 1545737	NLK	NW_004973287.1:1513193-1539759
MSTRG.46671.5	NW_004973287.1 : 1543473 - 1545737	LYRM9	NW_004973287.1:1486712-1496980
MSTRG.46671.5	NW_004973287.1 : 1543473 - 1545737	NOS2	NW_004973287.1:1454694-1479585
MSTRG.46623.1	NW_004973287.1 : 1128582 - 1129913	MRPS23	NW_004973287.1:1037040-1039117
MSTRG.46350.1	NW_004973285.1 : 5906225 - 5908807	LOC102095508	NW_004973285.1:5898584-5904650
MSTRG.46350.1	NW_004973285.1 : 5906225 - 5908807	CDRT4	NW_004973285.1:5856444-5882499
MSTRG.46350.1	NW_004973285.1 : 5906225 - 5908807	TEKT3	NW_004973285.1:5807302-5817423
MSTRG.46202.1	NW_004973285.1 : 5206022 - 5209637	LOC102094770	NW_004973285.1:5210579-5216421
MSTRG.45782.1	NW_004973285.1 : 2137138 - 2140773	UTP18	NW_004973285.1:2177976-2186055
MSTRG.45782.1	NW_004973285.1 : 2137138 - 2140773	MBTD1	NW_004973285.1:2148433-2176773
MSTRG.45782.1	NW_004973285.1 : 2137138 - 2140773	LOC102089990	NW_004973285.1:2145867-2148078
MSTRG.45782.1	NW_004973285.1 : 2137138 - 2140773	LOC102089814	NW_004973285.1:2141722-2144991
MSTRG.45782.1	NW_004973285.1 : 2137138 - 2140773	SPAG9	NW_004973285.1:2074236-2130461
MSTRG.45745.1	NW_004973285.1 : 1896610 - 1899142	WFIKKN2	NW_004973285.1:1986798-1991967
MSTRG.45745.1	NW_004973285.1 : 1896610 - 1899142	LOC102090942	NW_004973285.1:1968160-1972155
MSTRG.45745.1	NW_004973285.1 : 1896610 - 1899142	LUC7L3	NW_004973285.1:1948198-1965899
MSTRG.45745.1	NW_004973285.1 : 1896610 - 1899142	ANKRD40	NW_004973285.1:1939162-1946786
MSTRG.45678.16	NW_004973285.1 : 1559714 - 1562736	LRRC59	NW_004973285.1:1647902-1652148
MSTRG.45678.16	NW_004973285.1 : 1559714 - 1562736	EME1	NW_004973285.1:1641855-1646364
MSTRG.45678.16	NW_004973285.1 : 1559714 - 1562736	MRPL27	NW_004973285.1:1638004-1641512
MSTRG.45678.16	NW_004973285.1 : 1559714 - 1562736	XYLT2	NW_004973285.1:1621497-1630887
MSTRG.45678.16	NW_004973285.1 : 1559714 - 1562736	LOC102086590	NW_004973285.1:1615474-1619588
MSTRG.45678.16	NW_004973285.1 : 1559714 - 1562736	LOC110359350	NW_004973285.1:1614543-1615375
MSTRG.45678.16	NW_004973285.1 : 1559714 - 1562736	LOC102089488	NW_004973285.1:1610828-1614050
MSTRG.45678.16	NW_004973285.1 : 1559714 - 1562736	RAB37	NW_004973285.1:1592796-1602263
MSTRG.45678.16	NW_004973285.1 : 1559714 - 1562736	SLC9A3R1	NW_004973285.1:1582620-1585557
MSTRG.45678.16	NW_004973285.1 : 1559714 - 1562736	NAT9	NW_004973285.1:1575977-1580542
MSTRG.45678.16	NW_004973285.1 : 1559714 - 1562736	GRIN2C	NW_004973285.1:1511706-1528510
MSTRG.45678.16	NW_004973285.1 : 1559714 - 1562736	FDXR	NW_004973285.1:1490116-1499730
MSTRG.45678.16	NW_004973285.1 : 1559714 - 1562736	FADS6	NW_004973285.1:1483000-1488298
MSTRG.44819.1	NW_004973281.1 : 949503 - 950450	TBC1D12	NW_004973281.1:996056-1042203
MSTRG.44819.1	NW_004973281.1 : 949503 - 950450	LOC102088684	NW_004973281.1:975862-987226
MSTRG.44819.1	NW_004973281.1 : 949503 - 950450	TNKS2	NW_004973281.1:918767-942804
MSTRG.44753.34	NW_004973281.1 : 792362 - 793081	PPP1R3C	NW_004973281.1:883639-885815
MSTRG.44791.14	NW_004973281.1 : 839036 - 840539	PPP1R3C	NW_004973281.1:883639-885815
MSTRG.44819.1	NW_004973281.1 : 949503 - 950450	PPP1R3C	NW_004973281.1:883639-885815
MSTRG.44753.34	NW_004973281.1 : 792362 - 793081	HECTD2	NW_004973281.1:804442-843822
MSTRG.44760.1	NW_004973281.1 : 653573 - 654674	ANKRD1	NW_004973281.1:621994-630818
MSTRG.44760.1	NW_004973281.1 : 653573 - 654674	RPP30	NW_004973281.1:601379-619551
MSTRG.44760.1	NW_004973281.1 : 653573 - 654674	HTR7	NW_004973281.1:568246-594005
MSTRG.44711.23	NW_004973281.1 : 388798 - 404753	KIF20B	NW_004973281.1:409119-450618
MSTRG.44711.23	NW_004973281.1 : 388798 - 404753	SLC16A12	NW_004973281.1:313238-347805
MSTRG.44711.23	NW_004973281.1 : 388798 - 404753	LOC102084708	NW_004973281.1:300802-311028
MSTRG.43415.77	NW_004973277.1 : 493927 - 560058	CUNH12orf49	NW_004973277.1:639217-644788
MSTRG.43415.88	NW_004973277.1 : 564500 - 566250	CUNH12orf49	NW_004973277.1:639217-644788
MSTRG.42991.14	NW_004973276.1 : 228278 - 240147	LSM5	NW_004973276.1:333191-336925
MSTRG.42991.17	NW_004973276.1 : 228312 - 250027	LSM5	NW_004973276.1:333191-336925
MSTRG.42991.6	NW_004973276.1 : 228207 - 250028	LSM5	NW_004973276.1:333191-336925
MSTRG.42991.14	NW_004973276.1 : 228278 - 240147	CRTAP	NW_004973276.1:292469-319702
MSTRG.42991.17	NW_004973276.1 : 228312 - 250027	CRTAP	NW_004973276.1:292469-319702
MSTRG.42991.6	NW_004973276.1 : 228207 - 250028	CRTAP	NW_004973276.1:292469-319702
MSTRG.42991.14	NW_004973276.1 : 228278 - 240147	SUSD5	NW_004973276.1:249163-290590
MSTRG.42991.14	NW_004973276.1 : 228278 - 240147	FBXL2	NW_004973276.1:167657-220420
MSTRG.42991.17	NW_004973276.1 : 228312 - 250027	FBXL2	NW_004973276.1:167657-220420
MSTRG.42991.6	NW_004973276.1 : 228207 - 250028	FBXL2	NW_004973276.1:167657-220420
MSTRG.42561.1	NW_004973270.1 : 1016688 - 1025205	TSEN2	NW_004973270.1:958485-975172
MSTRG.42561.1	NW_004973270.1 : 1016688 - 1025205	MKRN2OS	NW_004973270.1:955991-961302
MSTRG.42561.1	NW_004973270.1 : 1016688 - 1025205	MKRN2	NW_004973270.1:943586-955544
MSTRG.42609.43	NW_004973270.1 : 1434246 - 1437019	TAMM41	NW_004973270.1:1348600-1383097
MSTRG.42575.1	NW_004973270.1 : 1126362 - 1127362	TIMP4	NW_004973270.1:1173881-1184177
MSTRG.42588.1	NW_004973270.1 : 1154921 - 1156154	TIMP4	NW_004973270.1:1173881-1184177
MSTRG.42330.1	NW_004973269.1 : 2786173 - 2787061	LOC110359059	NW_004973269.1:2882863-2886324
MSTRG.42330.1	NW_004973269.1 : 2786173 - 2787061	LMNB1	NW_004973269.1:2848512-2873453
MSTRG.42330.1	NW_004973269.1 : 2786173 - 2787061	CUNH5orf63	NW_004973269.1:2745123-2755257
MSTRG.41962.1	NW_004973268.1 : 1045249 - 1109359	BATF3	NW_004973268.1:984114-988724
MSTRG.41962.15	NW_004973268.1 : 1058785 - 1110751	BATF3	NW_004973268.1:984114-988724
MSTRG.41962.1	NW_004973268.1 : 1045249 - 1109359	NSL1	NW_004973268.1:968983-980553
MSTRG.41962.15	NW_004973268.1 : 1058785 - 1110751	NSL1	NW_004973268.1:968983-980553
MSTRG.41962.1	NW_004973268.1 : 1045249 - 1109359	TATDN3	NW_004973268.1:962113-968455
MSTRG.41962.15	NW_004973268.1 : 1058785 - 1110751	TATDN3	NW_004973268.1:962113-968455
MSTRG.41962.1	NW_004973268.1 : 1045249 - 1109359	PPP2R5A	NW_004973268.1:1137553-1184437
MSTRG.41962.15	NW_004973268.1 : 1058785 - 1110751	PPP2R5A	NW_004973268.1:1137553-1184437
MSTRG.41962.27	NW_004973268.1 : 1085528 - 1110743	PPP2R5A	NW_004973268.1:1137553-1184437
MSTRG.41962.28	NW_004973268.1 : 1085528 - 1110751	PPP2R5A	NW_004973268.1:1137553-1184437
MSTRG.41962.1	NW_004973268.1 : 1045249 - 1109359	TMEM206	NW_004973268.1:1115696-1135526
MSTRG.41962.15	NW_004973268.1 : 1058785 - 1110751	TMEM206	NW_004973268.1:1115696-1135526
MSTRG.41962.27	NW_004973268.1 : 1085528 - 1110743	TMEM206	NW_004973268.1:1115696-1135526
MSTRG.41962.28	NW_004973268.1 : 1085528 - 1110751	TMEM206	NW_004973268.1:1115696-1135526
MSTRG.41962.1	NW_004973268.1 : 1045249 - 1109359	ATF3	NW_004973268.1:1018802-1025952
MSTRG.41962.15	NW_004973268.1 : 1058785 - 1110751	ATF3	NW_004973268.1:1018802-1025952
MSTRG.41962.27	NW_004973268.1 : 1085528 - 1110743	ATF3	NW_004973268.1:1018802-1025952
MSTRG.41962.28	NW_004973268.1 : 1085528 - 1110751	ATF3	NW_004973268.1:1018802-1025952
MSTRG.39405.34	NW_004973264.1 : 116935 - 129871	SLC20A2	NW_004973264.1:73824-111669
MSTRG.39405.36	NW_004973264.1 : 119276 - 129871	SLC20A2	NW_004973264.1:73824-111669
MSTRG.39405.37	NW_004973264.1 : 119276 - 129294	SLC20A2	NW_004973264.1:73824-111669
MSTRG.39405.38	NW_004973264.1 : 119276 - 129871	SLC20A2	NW_004973264.1:73824-111669
MSTRG.39405.39	NW_004973264.1 : 119312 - 129871	SLC20A2	NW_004973264.1:73824-111669
MSTRG.39405.34	NW_004973264.1 : 116935 - 129871	DCTN6	NW_004973264.1:64825-66534
MSTRG.39405.36	NW_004973264.1 : 119276 - 129871	DCTN6	NW_004973264.1:64825-66534
MSTRG.39405.37	NW_004973264.1 : 119276 - 129294	DCTN6	NW_004973264.1:64825-66534
MSTRG.39405.38	NW_004973264.1 : 119276 - 129871	DCTN6	NW_004973264.1:64825-66534
MSTRG.39405.39	NW_004973264.1 : 119312 - 129871	DCTN6	NW_004973264.1:64825-66534
MSTRG.39405.34	NW_004973264.1 : 116935 - 129871	RBPMS	NW_004973264.1:49609-61966
MSTRG.39405.36	NW_004973264.1 : 119276 - 129871	RBPMS	NW_004973264.1:49609-61966
MSTRG.39405.37	NW_004973264.1 : 119276 - 129294	RBPMS	NW_004973264.1:49609-61966
MSTRG.39405.38	NW_004973264.1 : 119276 - 129871	RBPMS	NW_004973264.1:49609-61966
MSTRG.39405.39	NW_004973264.1 : 119312 - 129871	RBPMS	NW_004973264.1:49609-61966
MSTRG.39405.34	NW_004973264.1 : 116935 - 129871	SMIM18	NW_004973264.1:27193-37168
MSTRG.39405.36	NW_004973264.1 : 119276 - 129871	SMIM18	NW_004973264.1:27193-37168
MSTRG.39405.37	NW_004973264.1 : 119276 - 129294	SMIM18	NW_004973264.1:27193-37168
MSTRG.39405.38	NW_004973264.1 : 119276 - 129871	SMIM18	NW_004973264.1:27193-37168
MSTRG.39405.39	NW_004973264.1 : 119312 - 129871	SMIM18	NW_004973264.1:27193-37168
MSTRG.39405.34	NW_004973264.1 : 116935 - 129871	GTF2E2	NW_004973264.1:22776-42823
MSTRG.39405.36	NW_004973264.1 : 119276 - 129871	GTF2E2	NW_004973264.1:22776-42823
MSTRG.39405.37	NW_004973264.1 : 119276 - 129294	GTF2E2	NW_004973264.1:22776-42823
MSTRG.39405.38	NW_004973264.1 : 119276 - 129871	GTF2E2	NW_004973264.1:22776-42823
MSTRG.39405.39	NW_004973264.1 : 119312 - 129871	GTF2E2	NW_004973264.1:22776-42823
MSTRG.39405.34	NW_004973264.1 : 116935 - 129871	SH2D4A	NW_004973264.1:206300-215389
MSTRG.39405.36	NW_004973264.1 : 119276 - 129871	SH2D4A	NW_004973264.1:206300-215389
MSTRG.39405.37	NW_004973264.1 : 119276 - 129294	SH2D4A	NW_004973264.1:206300-215389
MSTRG.39405.38	NW_004973264.1 : 119276 - 129871	SH2D4A	NW_004973264.1:206300-215389
MSTRG.39405.39	NW_004973264.1 : 119312 - 129871	SH2D4A	NW_004973264.1:206300-215389
MSTRG.39405.34	NW_004973264.1 : 116935 - 129871	CSGALNACT1	NW_004973264.1:189634-202750
MSTRG.39405.36	NW_004973264.1 : 119276 - 129871	CSGALNACT1	NW_004973264.1:189634-202750
MSTRG.39405.37	NW_004973264.1 : 119276 - 129294	CSGALNACT1	NW_004973264.1:189634-202750
MSTRG.39405.38	NW_004973264.1 : 119276 - 129871	CSGALNACT1	NW_004973264.1:189634-202750
MSTRG.39405.39	NW_004973264.1 : 119312 - 129871	CSGALNACT1	NW_004973264.1:189634-202750
MSTRG.39405.34	NW_004973264.1 : 116935 - 129871	INTS10	NW_004973264.1:152509-170538
MSTRG.39405.36	NW_004973264.1 : 119276 - 129871	INTS10	NW_004973264.1:152509-170538
MSTRG.39405.37	NW_004973264.1 : 119276 - 129294	INTS10	NW_004973264.1:152509-170538
MSTRG.39405.38	NW_004973264.1 : 119276 - 129871	INTS10	NW_004973264.1:152509-170538
MSTRG.39405.39	NW_004973264.1 : 119312 - 129871	INTS10	NW_004973264.1:152509-170538
MSTRG.39405.34	NW_004973264.1 : 116935 - 129871	POMK	NW_004973264.1:138807-140815
MSTRG.39405.36	NW_004973264.1 : 119276 - 129871	POMK	NW_004973264.1:138807-140815
MSTRG.39405.37	NW_004973264.1 : 119276 - 129294	POMK	NW_004973264.1:138807-140815
MSTRG.39405.38	NW_004973264.1 : 119276 - 129871	POMK	NW_004973264.1:138807-140815
MSTRG.39405.39	NW_004973264.1 : 119312 - 129871	POMK	NW_004973264.1:138807-140815
MSTRG.39405.34	NW_004973264.1 : 116935 - 129871	HGSNAT	NW_004973264.1:132684-152412
MSTRG.39405.36	NW_004973264.1 : 119276 - 129871	HGSNAT	NW_004973264.1:132684-152412
MSTRG.39405.37	NW_004973264.1 : 119276 - 129294	HGSNAT	NW_004973264.1:132684-152412
MSTRG.39405.38	NW_004973264.1 : 119276 - 129871	HGSNAT	NW_004973264.1:132684-152412
MSTRG.39405.39	NW_004973264.1 : 119312 - 129871	HGSNAT	NW_004973264.1:132684-152412
MSTRG.36855.1	NW_004973262.1 : 7096355 - 7560174	TMEM229B	NW_004973262.1:7583661-7633527
MSTRG.36855.1	NW_004973262.1 : 7096355 - 7560174	LOC102089049	NW_004973262.1:7077668-7091752
MSTRG.36087.27	NW_004973262.1 : 407180 - 420407	FUT8	NW_004973262.1:321495-401332
MSTRG.35971.4	NW_004973261.1 : 4159052 - 4161776	NLE1	NW_004973261.1:4243668-4250623
MSTRG.35971.4	NW_004973261.1 : 4159052 - 4161776	AKAP10	NW_004973261.1:4227986-4243256
MSTRG.35971.4	NW_004973261.1 : 4159052 - 4161776	LOC110358551	NW_004973261.1:4186158-4211288
MSTRG.35971.4	NW_004973261.1 : 4159052 - 4161776	TMEM211	NW_004973261.1:4162091-4209767
MSTRG.35971.4	NW_004973261.1 : 4159052 - 4161776	ASPA	NW_004973261.1:4141901-4151515
MSTRG.35971.4	NW_004973261.1 : 4159052 - 4161776	TRPV3	NW_004973261.1:4111193-4140315
MSTRG.35971.4	NW_004973261.1 : 4159052 - 4161776	LOC102083725	NW_004973261.1:4097644-4111489
MSTRG.35971.4	NW_004973261.1 : 4159052 - 4161776	SHPK	NW_004973261.1:4088915-4097498
MSTRG.35971.4	NW_004973261.1 : 4159052 - 4161776	CTNS	NW_004973261.1:4083249-4088575
MSTRG.35971.4	NW_004973261.1 : 4159052 - 4161776	TAX1BP3	NW_004973261.1:4079301-4081585
MSTRG.35971.4	NW_004973261.1 : 4159052 - 4161776	EMC6	NW_004973261.1:4076850-4077300
MSTRG.35971.4	NW_004973261.1 : 4159052 - 4161776	P2RX5	NW_004973261.1:4062435-4074509
MSTRG.35872.1	NW_004973261.1 : 3611091 - 3612018	GOSR1	NW_004973261.1:3667320-3695781
MSTRG.35872.1	NW_004973261.1 : 3611091 - 3612018	CPD	NW_004973261.1:3636607-3665136
MSTRG.35872.1	NW_004973261.1 : 3611091 - 3612018	TMIGD1	NW_004973261.1:3630697-3634825
MSTRG.35872.1	NW_004973261.1 : 3611091 - 3612018	BLMH	NW_004973261.1:3612249-3628532
MSTRG.35872.1	NW_004973261.1 : 3611091 - 3612018	SLC6A4	NW_004973261.1:3584989-3605863
MSTRG.35872.1	NW_004973261.1 : 3611091 - 3612018	NSRP1	NW_004973261.1:3573287-3584182
MSTRG.35872.1	NW_004973261.1 : 3611091 - 3612018	EFCAB5	NW_004973261.1:3541808-3571979
MSTRG.35016.4	NW_004973259.1 : 70177 - 83800	TRAM1	NW_004973259.1:45468-58183
MSTRG.35016.4	NW_004973259.1 : 70177 - 83800	XKR9	NW_004973259.1:3777-17445
MSTRG.35016.56	NW_004973259.1 : 284939 - 288749	PRDM14	NW_004973259.1:300666-309191
MSTRG.35016.4	NW_004973259.1 : 70177 - 83800	LACTB2	NW_004973259.1:25753-41716
MSTRG.34945.2	NW_004973258.1 : 943114 - 945096	RRAGD	NW_004973258.1:985980-1000696
MSTRG.34945.2	NW_004973258.1 : 943114 - 945096	LYRM2	NW_004973258.1:861831-864879
MSTRG.34883.6	NW_004973258.1 : 374948 - 378377	LOC110354865	NW_004973258.1:406238-428190
MSTRG.34883.6	NW_004973258.1 : 374948 - 378377	MAP3K7	NW_004973258.1:380801-405559
MSTRG.34887.4	NW_004973258.1 : 405875 - 411526	MAP3K7	NW_004973258.1:380801-405559
MSTRG.34982.57	NW_004973258.1 : 1169008 - 1170948	BORCS6	NW_004973258.1:1187253-1190459
MSTRG.34982.57	NW_004973258.1 : 1169008 - 1170948	PM20D2	NW_004973258.1:1144874-1162919
MSTRG.34982.57	NW_004973258.1 : 1169008 - 1170948	GABRR1	NW_004973258.1:1108374-1138674
MSTRG.34945.2	NW_004973258.1 : 943114 - 945096	UBE2J1	NW_004973258.1:1014940-1040035
MSTRG.33828.1	NW_004973257.1 : 149910 - 152572	KCTD12	NW_004973257.1:211898-217239
MSTRG.33828.1	NW_004973257.1 : 149910 - 152572	ACOD1	NW_004973257.1:177299-184416
MSTRG.33828.1	NW_004973257.1 : 149910 - 152572	LOC102096417	NW_004973257.1:166689-175768
MSTRG.33828.1	NW_004973257.1 : 149910 - 152572	CLN5	NW_004973257.1:155331-169891
MSTRG.33828.1	NW_004973257.1 : 149910 - 152572	FBXL3	NW_004973257.1:138640-149844
MSTRG.32413.1	NW_004973256.1 : 34910 - 36260	WDR4	NW_004973256.1:95720-115780
MSTRG.32413.1	NW_004973256.1 : 34910 - 36260	LOC110358167	NW_004973256.1:6967-27806
MSTRG.33097.1	NW_004973256.1 : 5658132 - 5661094	LOC110358222	NW_004973256.1:5648699-5653030
MSTRG.33097.1	NW_004973256.1 : 5658132 - 5661094	LOC102094221	NW_004973256.1:5640598-5646295
MSTRG.33007.4	NW_004973256.1 : 5201504 - 5220704	COL6A3	NW_004973256.1:5249675-5310954
MSTRG.33007.4	NW_004973256.1 : 5201504 - 5220704	COPS8	NW_004973256.1:5163498-5176014
MSTRG.32758.16	NW_004973256.1 : 3762530 - 3798338	OTC	NW_004973256.1:3847054-3882011
MSTRG.32413.1	NW_004973256.1 : 34910 - 36260	NDUFV3	NW_004973256.1:115799-124504
MSTRG.32374.26	NW_004973255.1 : 3775478 - 3781163	AIRE	NW_004973255.1:3833073-3836794
MSTRG.32374.26	NW_004973255.1 : 3775478 - 3781163	LOC102093731	NW_004973255.1:3826389-3830329
MSTRG.32374.26	NW_004973255.1 : 3775478 - 3781163	SCLY	NW_004973255.1:3820540-3826752
MSTRG.32374.26	NW_004973255.1 : 3775478 - 3781163	SLC35G2	NW_004973255.1:3813288-3819926
MSTRG.32309.1	NW_004973255.1 : 3204810 - 3208968	MAP3K13	NW_004973255.1:3253985-3297545
MSTRG.32309.1	NW_004973255.1 : 3204810 - 3208968	TMEM41A	NW_004973255.1:3250849-3252837
MSTRG.32309.1	NW_004973255.1 : 3204810 - 3208968	LIPH	NW_004973255.1:3239097-3250550
MSTRG.32309.1	NW_004973255.1 : 3204810 - 3208968	ANAPC13	NW_004973255.1:3235492-3238807
MSTRG.32309.1	NW_004973255.1 : 3204810 - 3208968	CEP63	NW_004973255.1:3214766-3250612
MSTRG.32107.1	NW_004973255.1 : 1885580 - 1938949	PIGX	NW_004973255.1:1992428-2000735
MSTRG.32107.1	NW_004973255.1 : 1885580 - 1938949	CEP19	NW_004973255.1:1988035-1992095
MSTRG.32107.1	NW_004973255.1 : 1885580 - 1938949	NRROS	NW_004973255.1:1973937-1985518
MSTRG.32107.1	NW_004973255.1 : 1885580 - 1938949	FBXO45	NW_004973255.1:1963009-1968497
MSTRG.32107.1	NW_004973255.1 : 1885580 - 1938949	WDR53	NW_004973255.1:1955804-1960873
MSTRG.32107.1	NW_004973255.1 : 1885580 - 1938949	RNF168	NW_004973255.1:1942242-1949546
MSTRG.32107.1	NW_004973255.1 : 1885580 - 1938949	D2HGDH	NW_004973255.1:1865849-1876620
MSTRG.32107.1	NW_004973255.1 : 1885580 - 1938949	ING5	NW_004973255.1:1856202-1865357
MSTRG.32107.1	NW_004973255.1 : 1885580 - 1938949	DTYMK	NW_004973255.1:1846613-1855532
MSTRG.32107.1	NW_004973255.1 : 1885580 - 1938949	ATG4B	NW_004973255.1:1823786-1845020
MSTRG.32107.1	NW_004973255.1 : 1885580 - 1938949	THAP4	NW_004973255.1:1807728-1821763
MSTRG.31574.1	NW_004973254.1 : 5259518 - 5267123	SAP18	NW_004973254.1:5344025-5345294
MSTRG.31574.1	NW_004973254.1 : 5259518 - 5267123	SKA3	NW_004973254.1:5321367-5333997
MSTRG.31574.1	NW_004973254.1 : 5259518 - 5267123	MRPL57	NW_004973254.1:5319620-5320135
MSTRG.31574.1	NW_004973254.1 : 5259518 - 5267123	MICU2	NW_004973254.1:5191463-5254795
MSTRG.31245.1	NW_004973254.1 : 1319862 - 1322598	HSPH1	NW_004973254.1:1373186-1395541
MSTRG.31066.1	NW_004973253.1 : 19083531 - 19092365	WFS1	NW_004973253.1:19022102-19055500
MSTRG.30251.4	NW_004973253.1 : 12485634 - 12509332	SEPSECS	NW_004973253.1:12584000-12609073
MSTRG.30251.4	NW_004973253.1 : 12485634 - 12509332	PI4K2B	NW_004973253.1:12559823-12583408
MSTRG.30251.4	NW_004973253.1 : 12485634 - 12509332	ZCCHC4	NW_004973253.1:12549314-12559648
MSTRG.30251.4	NW_004973253.1 : 12485634 - 12509332	ANAPC4	NW_004973253.1:12526918-12548353
MSTRG.30231.1	NW_004973253.1 : 12329902 - 12354375	SEL1L3	NW_004973253.1:12418691-12451002
MSTRG.30231.2	NW_004973253.1 : 12331036 - 12359003	SEL1L3	NW_004973253.1:12418691-12451002
MSTRG.30251.4	NW_004973253.1 : 12485634 - 12509332	SEL1L3	NW_004973253.1:12418691-12451002
MSTRG.30231.1	NW_004973253.1 : 12329902 - 12354375	RBPJ	NW_004973253.1:12248735-12310657
MSTRG.30231.2	NW_004973253.1 : 12331036 - 12359003	RBPJ	NW_004973253.1:12248735-12310657
MSTRG.28296.1	NW_004973252.1 : 4546600 - 4548152	LAMC2	NW_004973252.1:4625560-4646750
MSTRG.28296.1	NW_004973252.1 : 4546600 - 4548152	LAMC1	NW_004973252.1:4554964-4621128
MSTRG.28296.1	NW_004973252.1 : 4546600 - 4548152	SHCBP1L	NW_004973252.1:4537326-4545780
MSTRG.28296.1	NW_004973252.1 : 4546600 - 4548152	DHX9	NW_004973252.1:4509939-4536359
MSTRG.28296.1	NW_004973252.1 : 4546600 - 4548152	HEBP2	NW_004973252.1:4482689-4488857
MSTRG.28296.1	NW_004973252.1 : 4546600 - 4548152	NPL	NW_004973252.1:4479772-4512016
MSTRG.28296.1	NW_004973252.1 : 4546600 - 4548152	PIF1	NW_004973252.1:4472432-4477414
MSTRG.28296.1	NW_004973252.1 : 4546600 - 4548152	FAM183A	NW_004973252.1:4468131-4471317
MSTRG.28296.1	NW_004973252.1 : 4546600 - 4548152	EBNA1BP2	NW_004973252.1:4461286-4467899
MSTRG.28186.18	NW_004973252.1 : 3131006 - 3150795	TMEM53	NW_004973252.1:3079368-3083090
MSTRG.28186.18	NW_004973252.1 : 3131006 - 3150795	CUNH1orf228	NW_004973252.1:3060769-3078859
MSTRG.28186.18	NW_004973252.1 : 3131006 - 3150795	KIF2C	NW_004973252.1:3047890-3065980
MSTRG.28186.18	NW_004973252.1 : 3131006 - 3150795	RPS8	NW_004973252.1:3039571-3043752
MSTRG.28186.18	NW_004973252.1 : 3131006 - 3150795	BEST4	NW_004973252.1:3032353-3036478
MSTRG.27094.1	NW_004973247.1 : 765953 - 766725	PARP16	NW_004973247.1:822234-828250
MSTRG.27094.1	NW_004973247.1 : 765953 - 766725	LOC102086517	NW_004973247.1:811892-816444
MSTRG.27094.1	NW_004973247.1 : 765953 - 766725	CILP	NW_004973247.1:789744-801849
MSTRG.27094.1	NW_004973247.1 : 765953 - 766725	MTFMT	NW_004973247.1:778328-783775
MSTRG.27094.1	NW_004973247.1 : 765953 - 766725	RASL12	NW_004973247.1:760964-765885
MSTRG.27094.1	NW_004973247.1 : 765953 - 766725	KBTBD13	NW_004973247.1:757327-759466
MSTRG.27094.1	NW_004973247.1 : 765953 - 766725	UBAP1L	NW_004973247.1:740366-754598
MSTRG.27094.1	NW_004973247.1 : 765953 - 766725	PDCD7	NW_004973247.1:736120-740228
MSTRG.27094.1	NW_004973247.1 : 765953 - 766725	CLPX	NW_004973247.1:713546-735578
MSTRG.27094.1	NW_004973247.1 : 765953 - 766725	SPG21	NW_004973247.1:702561-714256
MSTRG.27094.1	NW_004973247.1 : 765953 - 766725	ANKDD1A	NW_004973247.1:695264-702378
MSTRG.26782.31	NW_004973245.1 : 216557 - 218150	RNF152	NW_004973245.1:245633-283590
MSTRG.25720.1	NW_004973242.1 : 37435 - 41287	CLDN23	NW_004973242.1:76260-77664
MSTRG.25720.1	NW_004973242.1 : 37435 - 41287	LOC110357623	NW_004973242.1:67493-75485
MSTRG.25720.1	NW_004973242.1 : 37435 - 41287	LOC102086281	NW_004973242.1:62372-83096
MSTRG.25720.1	NW_004973242.1 : 37435 - 41287	PPP1R3B	NW_004973242.1:27950-33589
MSTRG.25720.1	NW_004973242.1 : 37435 - 41287	RPS3A	NW_004973242.1:136478-139906
MSTRG.25745.28	NW_004973242.1 : 187424 - 207971	RPS3A	NW_004973242.1:136478-139906
MSTRG.25720.1	NW_004973242.1 : 37435 - 41287	LOC102098159	NW_004973242.1:133654-134166
MSTRG.25745.28	NW_004973242.1 : 187424 - 207971	LOC102098159	NW_004973242.1:133654-134166
MSTRG.25720.1	NW_004973242.1 : 37435 - 41287	MBOAT4	NW_004973242.1:125419-128862
MSTRG.25745.28	NW_004973242.1 : 187424 - 207971	MBOAT4	NW_004973242.1:125419-128862
MSTRG.25720.1	NW_004973242.1 : 37435 - 41287	PRAG1	NW_004973242.1:102125-123779
MSTRG.25745.28	NW_004973242.1 : 187424 - 207971	PRAG1	NW_004973242.1:102125-123779
MSTRG.25681.3	NW_004973241.1 : 59401 - 68932	MRPL54	NW_004973241.1:713-3183
MSTRG.25681.3	NW_004973241.1 : 59401 - 68932	ELAVL1	NW_004973241.1:70285-96071
MSTRG.25681.3	NW_004973241.1 : 59401 - 68932	LOC102097268	NW_004973241.1:3674-10621
MSTRG.25681.3	NW_004973241.1 : 59401 - 68932	MATK	NW_004973241.1:26034-34580
MSTRG.25681.3	NW_004973241.1 : 59401 - 68932	POLE4	NW_004973241.1:144098-146876
MSTRG.25681.3	NW_004973241.1 : 59401 - 68932	PRAM1	NW_004973241.1:133496-143477
MSTRG.25681.3	NW_004973241.1 : 59401 - 68932	LOC102096782	NW_004973241.1:116988-130254
MSTRG.25503.4	NW_004973238.1 : 480436 - 527373	OTUD1	NW_004973238.1:528439-530330
MSTRG.25505.1	NW_004973238.1 : 515037 - 516525	OTUD1	NW_004973238.1:528439-530330
MSTRG.25509.1	NW_004973238.1 : 523571 - 527357	OTUD1	NW_004973238.1:528439-530330
MSTRG.25511.1	NW_004973238.1 : 532306 - 535832	OTUD1	NW_004973238.1:528439-530330
MSTRG.24661.2	NW_004973236.1 : 1 - 7031	EYA3	NW_004973236.1:63381-84674
MSTRG.24810.1	NW_004973236.1 : 514180 - 520218	SFN	NW_004973236.1:611783-612828
MSTRG.24810.1	NW_004973236.1 : 514180 - 520218	GPN2	NW_004973236.1:602181-607302
MSTRG.24810.1	NW_004973236.1 : 514180 - 520218	GPATCH3	NW_004973236.1:596682-601242
MSTRG.24790.2	NW_004973236.1 : 456061 - 495167	NR0B2	NW_004973236.1:590859-593796
MSTRG.24810.1	NW_004973236.1 : 514180 - 520218	NR0B2	NW_004973236.1:590859-593796
MSTRG.24790.2	NW_004973236.1 : 456061 - 495167	NUDC	NW_004973236.1:581486-589500
MSTRG.24810.1	NW_004973236.1 : 514180 - 520218	NUDC	NW_004973236.1:581486-589500
MSTRG.24790.2	NW_004973236.1 : 456061 - 495167	KDF1	NW_004973236.1:568004-575893
MSTRG.24810.1	NW_004973236.1 : 514180 - 520218	KDF1	NW_004973236.1:568004-575893
MSTRG.24790.2	NW_004973236.1 : 456061 - 495167	SLC9A1	NW_004973236.1:502012-530715
MSTRG.24810.1	NW_004973236.1 : 514180 - 520218	WDTC1	NW_004973236.1:469361-489605
MSTRG.24810.1	NW_004973236.1 : 514180 - 520218	TMEM222	NW_004973236.1:456061-464603
MSTRG.24790.2	NW_004973236.1 : 456061 - 495167	SYTL1	NW_004973236.1:447155-451513
MSTRG.24810.1	NW_004973236.1 : 514180 - 520218	SYTL1	NW_004973236.1:447155-451513
MSTRG.24790.2	NW_004973236.1 : 456061 - 495167	CD164L2	NW_004973236.1:440619-445586
MSTRG.24810.1	NW_004973236.1 : 514180 - 520218	CD164L2	NW_004973236.1:440619-445586
MSTRG.24790.2	NW_004973236.1 : 456061 - 495167	GPR3	NW_004973236.1:436696-438809
MSTRG.24810.1	NW_004973236.1 : 514180 - 520218	GPR3	NW_004973236.1:436696-438809
MSTRG.24661.2	NW_004973236.1 : 1 - 7031	PTAFR	NW_004973236.1:42410-52284
MSTRG.24790.2	NW_004973236.1 : 456061 - 495167	WASF2	NW_004973236.1:398667-430657
MSTRG.24790.2	NW_004973236.1 : 456061 - 495167	AHDC1	NW_004973236.1:376059-413327
MSTRG.24790.2	NW_004973236.1 : 456061 - 495167	LOC110357554	NW_004973236.1:363472-365482
MSTRG.24661.2	NW_004973236.1 : 1 - 7031	DNAJC8	NW_004973236.1:32382-37974
MSTRG.24661.2	NW_004973236.1 : 1 - 7031	ATPIF1	NW_004973236.1:30366-32280
MSTRG.24661.2	NW_004973236.1 : 1 - 7031	HNRNPR	NW_004973236.1:10485-23278
MSTRG.24624.1	NW_004973235.1 : 4942635 - 5040359	C2CD3	NW_004973235.1:5087686-5137735
MSTRG.24624.1	NW_004973235.1 : 4942635 - 5040359	LOC102092157	NW_004973235.1:5082019-5087533
MSTRG.24624.1	NW_004973235.1 : 4942635 - 5040359	DNAJB13	NW_004973235.1:5077529-5081496
MSTRG.24624.1	NW_004973235.1 : 4942635 - 5040359	PAAF1	NW_004973235.1:5060323-5077763
MSTRG.24624.1	NW_004973235.1 : 4942635 - 5040359	MRPL48	NW_004973235.1:5045359-5057122
MSTRG.24566.16	NW_004973235.1 : 4508887 - 4582916	P2RY2	NW_004973235.1:4645517-4655742
MSTRG.24557.2	NW_004973235.1 : 4407908 - 4418612	RPS3	NW_004973235.1:4420856-4427707
MSTRG.24566.16	NW_004973235.1 : 4508887 - 4582916	RPS3	NW_004973235.1:4420856-4427707
MSTRG.24574.1	NW_004973235.1 : 4458371 - 4464013	RPS3	NW_004973235.1:4420856-4427707
MSTRG.24566.16	NW_004973235.1 : 4508887 - 4582916	SERPINH1	NW_004973235.1:4409750-4417617
MSTRG.24574.1	NW_004973235.1 : 4458371 - 4464013	SERPINH1	NW_004973235.1:4409750-4417617
MSTRG.23514.1	NW_004973234.1 : 837731 - 838661	LONRF3	NW_004973234.1:875544-895344
MSTRG.23514.1	NW_004973234.1 : 837731 - 838661	LOC102089167	NW_004973234.1:855052-869616
MSTRG.23514.1	NW_004973234.1 : 837731 - 838661	FAM199X	NW_004973234.1:839251-848719
MSTRG.24070.2	NW_004973234.1 : 3486582 - 3488602	LOC110357429	NW_004973234.1:3565333-3568288
MSTRG.24070.2	NW_004973234.1 : 3486582 - 3488602	LOC110357483	NW_004973234.1:3548570-3560016
MSTRG.24070.2	NW_004973234.1 : 3486582 - 3488602	HPRT1	NW_004973234.1:3529323-3547680
MSTRG.24070.2	NW_004973234.1 : 3486582 - 3488602	PHF6	NW_004973234.1:3494140-3513281
MSTRG.24001.3	NW_004973234.1 : 2764124 - 2769362	RAP2C	NW_004973234.1:2825776-2835765
MSTRG.24001.3	NW_004973234.1 : 2764124 - 2769362	FRMD7	NW_004973234.1:2805006-2817214
MSTRG.24001.3	NW_004973234.1 : 2764124 - 2769362	STK26	NW_004973234.1:2785997-2802539
MSTRG.24001.3	NW_004973234.1 : 2764124 - 2769362	IL13RA1	NW_004973234.1:2734530-2746119
MSTRG.23438.1	NW_004973232.1 : 3787689 - 3871569	LOC102088239	NW_004973232.1:3873319-3919349
MSTRG.22904.2	NW_004973231.1 : 605648 - 617217	LRRC70	NW_004973231.1:532797-541305
MSTRG.22904.2	NW_004973231.1 : 605648 - 617217	IPO11	NW_004973231.1:505733-603344
MSTRG.22803.2	NW_004973229.1 : 911655 - 919457	LOC102093062	NW_004973229.1:857259-859702
MSTRG.21927.56	NW_004973228.1 : 463721 - 568240	LOC102089913	NW_004973228.1:411636-436062
MSTRG.21916.2	NW_004973228.1 : 318566 - 323972	KDM7A	NW_004973228.1:349003-390449
MSTRG.21916.2	NW_004973228.1 : 318566 - 323972	SLC37A3	NW_004973228.1:274265-296186
MSTRG.21916.2	NW_004973228.1 : 318566 - 323972	RAB19	NW_004973228.1:266260-271615
MSTRG.21916.2	NW_004973228.1 : 318566 - 323972	MKRN1	NW_004973228.1:248522-261784
MSTRG.21650.1	NW_004973227.1 : 3851326 - 3900079	ACCS	NW_004973227.1:3915434-3933276
MSTRG.21650.1	NW_004973227.1 : 3851326 - 3900079	ALKBH3	NW_004973227.1:3815883-3839254
MSTRG.21194.2	NW_004973226.1 : 930076 - 968498	PDLIM3	NW_004973226.1:909131-929974
MSTRG.21194.2	NW_004973226.1 : 930076 - 968498	CUNH4orf47	NW_004973226.1:886445-900295
MSTRG.21194.2	NW_004973226.1 : 930076 - 968498	UFSP2	NW_004973226.1:874331-884803
MSTRG.21194.2	NW_004973226.1 : 930076 - 968498	ANKRD37	NW_004973226.1:871293-875963
MSTRG.21194.2	NW_004973226.1 : 930076 - 968498	LRP2BP	NW_004973226.1:858307-867013
MSTRG.21111.2	NW_004973226.1 : 465375 - 467611	PRIMPOL	NW_004973226.1:548070-565462
MSTRG.21111.2	NW_004973226.1 : 465375 - 467611	CASP3	NW_004973226.1:534619-545635
MSTRG.21111.2	NW_004973226.1 : 465375 - 467611	IRF2	NW_004973226.1:473800-515445
MSTRG.21111.2	NW_004973226.1 : 465375 - 467611	ENPP6	NW_004973226.1:405585-436612
MSTRG.21044.22	NW_004973226.1 : 71633 - 73359	ING2	NW_004973226.1:164517-169301
MSTRG.21044.22	NW_004973226.1 : 71633 - 73359	CDKN2AIP	NW_004973226.1:125881-152732
MSTRG.21044.22	NW_004973226.1 : 71633 - 73359	LOC102088362	NW_004973226.1:103522-104175
MSTRG.20358.22	NW_004973223.1 : 4624182 - 4639421	GLUD1	NW_004973223.1:4707619-4724646
MSTRG.20358.22	NW_004973223.1 : 4624182 - 4639421	RPS24	NW_004973223.1:4690774-4696045
MSTRG.20358.22	NW_004973223.1 : 4624182 - 4639421	POLR3A	NW_004973223.1:4654736-4689260
MSTRG.20358.22	NW_004973223.1 : 4624182 - 4639421	DLG5	NW_004973223.1:4533039-4599238
MSTRG.18728.1	NW_004973218.1 : 381997 - 385545	GATA3	NW_004973218.1:428721-457477
MSTRG.18728.2	NW_004973218.1 : 382711 - 384909	GATA3	NW_004973218.1:428721-457477
MSTRG.18390.2	NW_004973216.1 : 859059 - 867011	RRP15	NW_004973216.1:825496-846544
MSTRG.18231.2	NW_004973215.1 : 636602 - 638619	TGIF1	NW_004973215.1:688893-698615
MSTRG.18234.1	NW_004973215.1 : 643677 - 645433	TGIF1	NW_004973215.1:688893-698615
MSTRG.18231.2	NW_004973215.1 : 636602 - 638619	MYL12B	NW_004973215.1:639798-644475
MSTRG.18231.2	NW_004973215.1 : 636602 - 638619	LOC102098877	NW_004973215.1:611359-627422
MSTRG.18234.1	NW_004973215.1 : 643677 - 645433	LOC102098877	NW_004973215.1:611359-627422
MSTRG.18056.4	NW_004973213.1 : 702361 - 727788	CPA6	NW_004973213.1:635709-681746
MSTRG.17527.15	NW_004973212.1 : 646547 - 647866	ZCRB1	NW_004973212.1:674229-680995
MSTRG.17527.15	NW_004973212.1 : 646547 - 647866	YAF2	NW_004973212.1:606694-642067
MSTRG.17527.15	NW_004973212.1 : 646547 - 647866	GXYLT1	NW_004973212.1:567511-590416
MSTRG.17346.2	NW_004973211.1 : 3795205 - 3798890	PCDH18	NW_004973211.1:3832841-3842402
MSTRG.17071.6	NW_004973211.1 : 2367949 - 2368551	ZNF330	NW_004973211.1:2374859-2392855
MSTRG.16230.2	NW_004973209.1 : 47316 - 49855	CEP162	NW_004973209.1:97972-147019
MSTRG.16386.18	NW_004973209.1 : 790973 - 801682	SYNCRIP	NW_004973209.1:754158-778406
MSTRG.16386.20	NW_004973209.1 : 790973 - 801642	SYNCRIP	NW_004973209.1:754158-778406
MSTRG.16386.8	NW_004973209.1 : 780605 - 801626	SYNCRIP	NW_004973209.1:754158-778406
MSTRG.16386.9	NW_004973209.1 : 790476 - 801682	SYNCRIP	NW_004973209.1:754158-778406
MSTRG.16230.2	NW_004973209.1 : 47316 - 49855	LOC102088968	NW_004973209.1:7409-45086
MSTRG.16230.2	NW_004973209.1 : 47316 - 49855	MRAP2	NW_004973209.1:74072-99399
MSTRG.16366.1	NW_004973209.1 : 652719 - 655317	SNX14	NW_004973209.1:683725-754119
MSTRG.16386.8	NW_004973209.1 : 780605 - 801626	SNX14	NW_004973209.1:683725-754119
MSTRG.16366.1	NW_004973209.1 : 652719 - 655317	NT5E	NW_004973209.1:658817-683099
MSTRG.15541.42	NW_004973203.1 : 3448604 - 3453171	LOC102098037	NW_004973203.1:3387095-3388026
MSTRG.15541.42	NW_004973203.1 : 3448604 - 3453171	PLGRKT	NW_004973203.1:3368741-3379044
MSTRG.15481.1	NW_004973203.1 : 2877027 - 2885744	GLDC	NW_004973203.1:2900532-2947352
MSTRG.15481.2	NW_004973203.1 : 2877027 - 2885744	GLDC	NW_004973203.1:2900532-2947352
MSTRG.15240.45	NW_004973202.1 : 439940 - 448911	ARL1	NW_004973202.1:528370-532250
MSTRG.15240.48	NW_004973202.1 : 442155 - 455648	ARL1	NW_004973202.1:528370-532250
MSTRG.15240.45	NW_004973202.1 : 439940 - 448911	NUP205	NW_004973202.1:483692-523804
MSTRG.15240.48	NW_004973202.1 : 442155 - 455648	NUP205	NW_004973202.1:483692-523804
MSTRG.15240.45	NW_004973202.1 : 439940 - 448911	LOC110356862	NW_004973202.1:479550-482687
MSTRG.15240.48	NW_004973202.1 : 442155 - 455648	LOC110356862	NW_004973202.1:479550-482687
MSTRG.15240.45	NW_004973202.1 : 439940 - 448911	CNOT4	NW_004973202.1:374329-420003
MSTRG.15240.48	NW_004973202.1 : 442155 - 455648	CNOT4	NW_004973202.1:374329-420003
MSTRG.15216.1	NW_004973202.1 : 275416 - 277771	LOC102090564	NW_004973202.1:329255-353062
MSTRG.15216.1	NW_004973202.1 : 275416 - 277771	STRA8	NW_004973202.1:310613-325473
MSTRG.15216.1	NW_004973202.1 : 275416 - 277771	WDR91	NW_004973202.1:291972-310821
MSTRG.15216.1	NW_004973202.1 : 275416 - 277771	SCYL2	NW_004973202.1:222965-264295
MSTRG.15216.1	NW_004973202.1 : 275416 - 277771	SLC17A8	NW_004973202.1:182170-211222
MSTRG.14924.1	NW_004973200.1 : 7784702 - 7789142	PARD6B	NW_004973200.1:7858560-7872544
MSTRG.14924.1	NW_004973200.1 : 7784702 - 7789142	ADNP	NW_004973200.1:7797294-7819702
MSTRG.14924.1	NW_004973200.1 : 7784702 - 7789142	DPM1	NW_004973200.1:7772385-7781682
MSTRG.14924.1	NW_004973200.1 : 7784702 - 7789142	MOCS3	NW_004973200.1:7769346-7771401
MSTRG.14924.1	NW_004973200.1 : 7784702 - 7789142	KCNG1	NW_004973200.1:7747238-7754929
MSTRG.14829.1	NW_004973200.1 : 6695983 - 6701377	BCAS1	NW_004973200.1:6634349-6680514
MSTRG.14829.1	NW_004973200.1 : 6695983 - 6701377	LOC102098516	NW_004973200.1:6598930-6607667
MSTRG.13757.22	NW_004973200.1 : 516081 - 517700	KIAA1755	NW_004973200.1:587734-603700
MSTRG.13757.22	NW_004973200.1 : 516081 - 517700	TGM2	NW_004973200.1:573686-587568
MSTRG.14657.1	NW_004973200.1 : 5594677 - 5595712	SPO11	NW_004973200.1:5668629-5682405
MSTRG.14657.1	NW_004973200.1 : 5594677 - 5595712	RAE1	NW_004973200.1:5659318-5667529
MSTRG.14657.1	NW_004973200.1 : 5594677 - 5595712	RBM38	NW_004973200.1:5633611-5648350
MSTRG.14657.1	NW_004973200.1 : 5594677 - 5595712	CTCFL	NW_004973200.1:5566645-5580776
MSTRG.14657.1	NW_004973200.1 : 5594677 - 5595712	PCK1	NW_004973200.1:5546465-5554000
MSTRG.13757.22	NW_004973200.1 : 516081 - 517700	RPRD1B	NW_004973200.1:553335-570997
MSTRG.13757.22	NW_004973200.1 : 516081 - 517700	TTI1	NW_004973200.1:539055-553155
MSTRG.13757.22	NW_004973200.1 : 516081 - 517700	VSTM2L	NW_004973200.1:531913-536491
MSTRG.13757.22	NW_004973200.1 : 516081 - 517700	LOC110355874	NW_004973200.1:458210-464152
MSTRG.13757.22	NW_004973200.1 : 516081 - 517700	LOC102095187	NW_004973200.1:454047-456180
MSTRG.13757.22	NW_004973200.1 : 516081 - 517700	WFDC3	NW_004973200.1:450265-452671
MSTRG.13757.22	NW_004973200.1 : 516081 - 517700	LOC110355730	NW_004973200.1:443054-445103
MSTRG.13757.22	NW_004973200.1 : 516081 - 517700	LOC110355723	NW_004973200.1:436155-437849
MSTRG.13757.22	NW_004973200.1 : 516081 - 517700	DNTTIP1	NW_004973200.1:428399-431750
MSTRG.13757.22	NW_004973200.1 : 516081 - 517700	UBE2C	NW_004973200.1:426647-427614
MSTRG.13757.22	NW_004973200.1 : 516081 - 517700	LOC110355861	NW_004973200.1:425517-426414
MSTRG.13757.22	NW_004973200.1 : 516081 - 517700	TNNC2	NW_004973200.1:423090-424983
MSTRG.13757.22	NW_004973200.1 : 516081 - 517700	SNX21	NW_004973200.1:419100-422079
MSTRG.13757.22	NW_004973200.1 : 516081 - 517700	ACOT8	NW_004973200.1:417250-419012
MSTRG.14134.7	NW_004973200.1 : 2093675 - 2094320	EEF1A2	NW_004973200.1:2137717-2151401
MSTRG.14134.7	NW_004973200.1 : 2093675 - 2094320	PPDPF	NW_004973200.1:2128078-2129922
MSTRG.14134.7	NW_004973200.1 : 2093675 - 2094320	LOC102097504	NW_004973200.1:2116182-2125618
MSTRG.14134.7	NW_004973200.1 : 2093675 - 2094320	PCMTD2	NW_004973200.1:2056706-2069219
MSTRG.14034.3	NW_004973200.1 : 1517748 - 1520478	UCKL1	NW_004973200.1:1597239-1615350
MSTRG.14034.3	NW_004973200.1 : 1517748 - 1520478	DNAJC5	NW_004973200.1:1568542-1576911
MSTRG.14034.3	NW_004973200.1 : 1517748 - 1520478	TPD52L2	NW_004973200.1:1541303-1556771
MSTRG.14034.3	NW_004973200.1 : 1517748 - 1520478	ZBTB46	NW_004973200.1:1472005-1516608
MSTRG.14034.3	NW_004973200.1 : 1517748 - 1520478	LIME1	NW_004973200.1:1444502-1451278
[truncated: 187 more rows]

## Sheet: Supplementary Table S3d
Table S3d The predicted target genes of DE-lncRNA by trans in N vs. T birds
[truncated: 16,588 more rows]

[truncated: 2 more sheets: Supplementary Table S3e, Supplementary Table S3f]
